# Supplementary material for: Unravelling the proteome of adult rhesus monkey ovaries
Source: Royal Society of Chemistry journal article supplement (doi:10.1039/c3mb70312f), 2013-11-25
Supplement: c3mb70312f.xlsx [file c3mb70312f.xlsx]

## Sheet: proteins
Supplementary Data 1a. Credible proteins identified in the Rhesus ovary proteome with FDR of 1%
id	Protein IDs	Rhesus Ensemble Protein ID	Rhesus Ensemble Transcript ID	Rhesus Ensemble Gene ID	Description	Human Ensemble Protein ID	Human Ensemble Gene ID	Human Gene Name	Human Description	Homology Type	Mouse Ensemble Protein ID	Mouse Ensemble Gene ID	Homology Type	Peptides	Unique peptides	Peptides R1	Peptides R2	Peptides R3	Replicates	Reliable （pep>=2）	Unique peptides R1	Unique peptides R2	Unique peptides R3	Sequence coverage [%]	Unique sequence coverage [%]	Mol. weight [kDa]	Sequence length	Experiment R1	Experiment R2	Experiment R3	PEP	Sequence coverage R1 [%]	Sequence coverage R2 [%]	Sequence coverage R3 [%]	Intensity	Intensity R1	Intensity R2	Intensity R3	iBAQ	iBAQ R1	iBAQ R2	iBAQ R3
4	ENSMMUP00000000004	ENSMMUP00000000004	ENSMMUT00000000005	ENSMMUG00000000005	ENSMMUP00000000004|ENSMMUT00000000005|ENSMMUG00000000005|NAGA|N-acetylgalactosaminidase, alpha- [Source:HGNC Symbol;Acc:7631]	ENSP00000379680	ENSG00000198951	NAGA	N-acetylgalactosaminidase, alpha- [Source:HGNC Symbol;Acc:7631]	ortholog_one2one	ENSMUSP00000020397	ENSMUSG00000020180	apparent_ortholog_one2one	8	8	2	6	4	YES	YES	2	6	4	30.7	30.7	40.709	361	3	6	6	4.4136e-40	8.6	18.3	22.2	56964000	6445200	27201000	23318000	2848200	322260	1360100	1165900
6	ENSMMUP00000000013;ENSMMUP00000000011	ENSMMUP00000000013	ENSMMUT00000000016	ENSMMUG00000000009	ENSMMUP00000000013|ENSMMUT00000000016|ENSMMUG00000000009|PTPRC|protein tyrosine phosphatase, receptor type, C [Source:HGNC Symbol;Acc:9666];	ENSP00000411355	ENSG00000081237	PTPRC	protein tyrosine phosphatase, receptor type, C [Source:HGNC Symbol;Acc:9666]	ortholog_one2one	ENSMUSP00000064500	ENSMUSG00000026047	apparent_ortholog_one2one	7	7	6	6	6	YES	YES	6	6	6	8.2	8.2	144.52	1279	19	18	13	6.7315e-138	7.1	6.6	7.1	446020000	192980000	128310000	124730000	6657000	2880400	1915000	1861600
7	ENSMMUP00000000021	ENSMMUP00000000021	ENSMMUT00000000024	ENSMMUG00000000016	ENSMMUP00000000021|ENSMMUT00000000024|ENSMMUG00000000016|ADSS|adenylosuccinate synthase [Source:HGNC Symbol;Acc:292]	ENSP00000355493	ENSG00000035687	ADSS	adenylosuccinate synthase [Source:HGNC Symbol;Acc:292]	ortholog_one2one	ENSMUSP00000093905	ENSMUSG00000033653	apparent_ortholog_one2one	11	10	8	9	10	YES	YES	8	8	10	30.5	28.9	50.134	456	28	26	27	1.1777e-174	23	24.6	28.9	601520000	197890000	213350000	190280000	23135000	7611200	8205800	7318400
8	ENSMMUP00000000024	ENSMMUP00000000024	ENSMMUT00000000027	ENSMMUG00000000022	ENSMMUP00000000024|ENSMMUT00000000027|ENSMMUG00000000022|ZP1|zona pellucida glycoprotein 1 (sperm receptor) [Source:HGNC Symbol;Acc:13187]	ENSP00000278853	ENSG00000149506	ZP1	zona pellucida glycoprotein 1 (sperm receptor) [Source:HGNC Symbol;Acc:13187]	ortholog_one2one	ENSMUSP00000095025	ENSMUSG00000062078	apparent_ortholog_one2one	7	7	7	5	5	YES	YES	7	5	5	13.1	13.1	70.145	640	21	23	17	7.4583e-42	13.1	9.1	9.1	552310000	185280000	228610000	138420000	23013000	7720100	9525500	5767500
11	ENSMMUP00000000057;ENSMMUP00000038391	ENSMMUP00000000057	ENSMMUT00000000063	ENSMMUG00000000043	ENSMMUP00000000057|ENSMMUT00000000063|ENSMMUG00000000043|ORC4L|origin recognition complex, subunit 4-like (S. cerevisiae) [Source:HGNC Symbol;Acc:8490]	ENSP00000441953	ENSG00000115947	ORC4	origin recognition complex, subunit 4 [Source:HGNC Symbol;Acc:8490]	ortholog_one2one	ENSMUSP00000102471	ENSMUSG00000028522	apparent_ortholog_one2one	3	3	1	2	3	YES	YES	1	2	3	10.9	10.9	49.796	432	1	4	5	2.3219e-30	2.1	7.2	10.9	12873000	702570	1936700	10234000	476770	26021	71730	379020
12	ENSMMUP00000000071	ENSMMUP00000000071	ENSMMUT00000000078	ENSMMUG00000000054	ENSMMUP00000000071|ENSMMUT00000000078|ENSMMUG00000000054|ALKBH7|alkB, alkylation repair homolog 7 (E. coli) [Source:HGNC Symbol;Acc:21306]	ENSP00000245812	ENSG00000125652	ALKBH7	alkB, alkylation repair homolog 7 (E. coli) [Source:HGNC Symbol;Acc:21306]	ortholog_one2one	ENSMUSP00000030636	ENSMUSG00000028832	apparent_ortholog_one2one	3	3	2	1	2	YES	YES	2	1	2	14.9	14.9	24.654	221	3	1	2	5.1709e-10	14.9	8.1	14.5	5194600	2114100	2046300	1034200	324670	132130	127890	64639
13	ENSMMUP00000000075	ENSMMUP00000000075	ENSMMUT00000000082	ENSMMUG00000000058	ENSMMUP00000000075|ENSMMUT00000000082|ENSMMUG00000000058						ENSMUSP00000128803	ENSMUSG00000090841	apparent_ortholog_one2one	2	2	1	1	2	YES	YES	1	1	2	25.9	25.9	22.637	212	3	3	4	7.716e-21	10.8	10.8	25.9	68418000	15065000	31075000	22278000	5701500	1255400	2589600	1856500
15	ENSMMUP00000026448;ENSMMUP00000026449;ENSMMUP00000026450;ENSMMUP00000000085;ENSMMUP00000026447	ENSMMUP00000026448	ENSMMUT00000028265	ENSMMUG00000020092	ENSMMUP00000026448|ENSMMUT00000028265|ENSMMUG00000020092;						ENSMUSP00000030381	ENSMUSG00000028633	ortholog_one2one	4	2	4	4	3	YES	YES	2	2	2	25	16.5	24.836	236	13	15	14	8.5953e-192	25	25	22.9	2532600000	640290000	1006100000	886220000	211050000	53358000	83844000	73851000
17	ENSMMUP00000000092	ENSMMUP00000000092	ENSMMUT00000000102	ENSMMUG00000000072	ENSMMUP00000000092|ENSMMUT00000000102|ENSMMUG00000000072|CSTF1|cleavage stimulation factor, 3 pre-RNA, subunit 1, 50kDa [Source:HGNC Symbol;Acc:2483]	ENSP00000217109	ENSG00000101138	CSTF1	cleavage stimulation factor, 3' pre-RNA, subunit 1, 50kDa [Source:HGNC Symbol;Acc:2483]	apparent_ortholog_one2one	ENSMUSP00000065113	ENSMUSG00000052738	apparent_ortholog_one2one	3	3	2	2	3	YES	YES	2	2	3	20.5	20.5	38.505	346	3	4	4	2.2073e-25	13.6	13.6	20.5	93409000	35011000	35715000	22683000	5838100	2188200	2232200	1417700
18	ENSMMUP00000000097;ENSMMUP00000038153;ENSMMUP00000000098;ENSMMUP00000000099	ENSMMUP00000000097	ENSMMUT00000000107	ENSMMUG00000000074	ENSMMUP00000000097|ENSMMUT00000000107|ENSMMUG00000000074|C10H20orf43;	ENSP00000023939	ENSG00000022277	RTFDC1	replication termination factor 2 domain containing 1 [Source:HGNC Symbol;Acc:15890]	ortholog_one2one	ENSMUSP00000061092	ENSMUSG00000062937	apparent_ortholog_one2one	2	2	1	1	2	YES	YES	1	1	2	10.5	10.5	33.899	306	1	1	2	5.1842e-20	7.2	7.2	10.5	15613000	5417200	4503200	5692500	743470	257960	214440	271070
19	ENSMMUP00000000105;ENSMMUP00000000106	ENSMMUP00000000105	ENSMMUT00000000115	ENSMMUG00000000081	ENSMMUP00000000105|ENSMMUT00000000115|ENSMMUG00000000081|PRKAR2A;	ENSP00000265563	ENSG00000114302	PRKAR2A	protein kinase, cAMP-dependent, regulatory, type II, alpha [Source:HGNC Symbol;Acc:9391]	ortholog_one2one	ENSMUSP00000029773	ENSMUSG00000053931	apparent_ortholog_one2one	12	9	12	12	11	YES	YES	9	9	9	38.5	32	45.214	403	62	77	57	0	38.5	38.5	37	2821500000	957870000	1065100000	798590000	108520000	36841000	40965000	30715000
21	ENSMMUP00000000146;ENSMMUP00000000144	ENSMMUP00000000146	ENSMMUT00000000158	ENSMMUG00000000108	ENSMMUP00000000146|ENSMMUT00000000158|ENSMMUG00000000108|NCKAP1L|NCK-associated protein 1-like [Source:HGNC Symbol;Acc:4862];	ENSP00000293373	ENSG00000123338	NCKAP1L	NCK-associated protein 1-like [Source:HGNC Symbol;Acc:4862]	ortholog_one2one	ENSMUSP00000029773	ENSMUSG00000053931	apparent_ortholog_one2one	3	3	2	3	2	YES	YES	2	3	2	4.3	4.3	130.23	1144	2	5	5	6.598e-13	2.2	4.3	3.1	51309000	6398800	22267000	22644000	801710	99981	347920	353810
22	ENSMMUP00000000156	ENSMMUP00000000156	ENSMMUT00000000168	ENSMMUG00000000117	ENSMMUP00000000156|ENSMMUT00000000168|ENSMMUG00000000117|HCK|hemopoietic cell kinase [Source:HGNC Symbol;Acc:4840]	ENSP00000365012	ENSG00000101336	HCK	hemopoietic cell kinase [Source:HGNC Symbol;Acc:4840]	ortholog_one2one	ENSMUSP00000136977	ENSMUSG00000020366	apparent_ortholog_one2one	5	4	4	3	4	YES	YES	3	2	3	11.1	9.5	57.328	505	4	4	4	1.0493e-25	7.5	4.6	8.1	33408000	11211000	14552000	7645300	1077700	361650	469410	246620
23	ENSMMUP00000000159	ENSMMUP00000000159	ENSMMUT00000000171	ENSMMUG00000000120	ENSMMUP00000000159|ENSMMUT00000000171|ENSMMUG00000000120|IGHV@						ENSMUSP00000028981	ENSMUSG00000027479	apparent_ortholog_one2one	2	1	2	2	2	YES	YES	1	1	1	28	9	11.086	100	6	6	4	3.4208e-89	28	28	28	118580000	45708000	37657000	35211000	19763000	7618000	6276200	5868600
24	ENSMMUP00000000160	ENSMMUP00000000160	ENSMMUT00000000172	ENSMMUG00000000122	ENSMMUP00000000160|ENSMMUT00000000172|ENSMMUG00000000122|HEBP2|heme binding protein 2 [Source:HGNC Symbol;Acc:15716]	ENSP00000058691	ENSG00000051620	HEBP2	heme binding protein 2 [Source:HGNC Symbol;Acc:15716]	ortholog_one2one	ENSMUSP00000085218	ENSMUSG00000027522	apparent_ortholog_one2one	3	3	2	2	2	YES	YES	2	2	2	28.8	28.8	22.958	205	2	2	2	1.7119e-11	16.1	16.1	18.5	18991000	4619900	5588600	8782300	1899100	461990	558860	878230
25	ENSMMUP00000000168	ENSMMUP00000000168	ENSMMUT00000000180	ENSMMUG00000000125	ENSMMUP00000000168|ENSMMUT00000000180|ENSMMUG00000000125|RAB22A|RAB22A, member RAS oncogene family [Source:HGNC Symbol;Acc:9764]	ENSP00000244040	ENSG00000124209	RAB22A	RAB22A, member RAS oncogene family [Source:HGNC Symbol;Acc:9764]	ortholog_one2one	ENSMUSP00000093992	ENSMUSG00000065979	apparent_ortholog_one2one	3	2	3	3	2	YES	YES	2	2	2	24.7	19.1	21.839	194	5	3	3	3.6267e-17	24.7	24.7	19.1	59504000	28461000	18769000	12274000	4250300	2032900	1340600	876740
26	ENSMMUP00000032212;ENSMMUP00000032211;ENSMMUP00000000171	ENSMMUP00000032212	ENSMMUT00000039126	ENSMMUG00000000129	ENSMMUP00000032212|ENSMMUT00000039126|ENSMMUG00000000129|SH2D4A|SH2 domain containing 4A [Source:HGNC Symbol;Acc:26102];	ENSP00000265807	ENSG00000104611	SH2D4A	SH2 domain containing 4A [Source:HGNC Symbol;Acc:26102]	ortholog_one2one	ENSMUSP00000088779	ENSMUSG00000031441	ortholog_one2one	2	2	1	1	1	YES	YES	1	1	1	7.3	7.3	52.596	454	2	1	1	2.3341e-07	3.5	3.7	3.5	5307400	2700800	1427400	1179200	196570	100030	52867	43675
27	ENSMMUP00000000174	ENSMMUP00000000174	ENSMMUT00000000187	ENSMMUG00000000131	ENSMMUP00000000174|ENSMMUT00000000187|ENSMMUG00000000131|EFHD1|EF-hand domain family, member D1 [Source:HGNC Symbol;Acc:29556]	ENSP00000264059	ENSG00000115468	EFHD1	EF-hand domain family, member D1 [Source:HGNC Symbol;Acc:29556]	ortholog_one2one	ENSMUSP00000072087	ENSMUSG00000058587	apparent_ortholog_one2one	2	1	2	2	2	YES	YES	1	1	1	9.8	5.5	26.492	235	3	1	1	1.6404e-20	9.8	9.8	9.8	11340000	6052600	3163700	2123500	629990	336260	175760	117970
29	ENSMMUP00000039189;ENSMMUP00000000189	ENSMMUP00000039189	ENSMMUT00000046145	ENSMMUG00000000141	ENSMMUP00000039189|ENSMMUT00000046145|ENSMMUG00000000141|CDC37L1|cell division cycle 37 homolog (S. cerevisiae)-like 1 [Source:HGNC Symbol;Acc:17179];	ENSP00000371278	ENSG00000106993	CDC37L1	cell division cycle 37-like 1 [Source:HGNC Symbol;Acc:17179]	ortholog_one2one				3	3	2	3	3	YES	YES	2	3	3	10.4	10.4	38.88	337	4	6	8	1.3326e-19	5.9	10.4	10.4	66805000	9718300	44756000	12331000	3181200	462780	2131200	587170
30	ENSMMUP00000000191	ENSMMUP00000000191	ENSMMUT00000000204	ENSMMUG00000000143	ENSMMUP00000000191|ENSMMUT00000000204|ENSMMUG00000000143|AK3|adenylate kinase 3 [Source:HGNC Symbol;Acc:17376]	ENSP00000371230	ENSG00000147853	AK3	adenylate kinase 3 [Source:HGNC Symbol;Acc:17376]	ortholog_one2one	ENSMUSP00000039172	ENSMUSG00000036854	apparent_ortholog_one2one	5	5	4	5	4	YES	YES	4	5	4	29.1	29.1	25.483	227	26	26	19	3.0964e-171	23.8	29.1	23.8	615690000	293480000	203330000	118880000	29319000	13975000	9682600	5660700
31	ENSMMUP00000000195;ENSMMUP00000000194;ENSMMUP00000035118;ENSMMUP00000035122	ENSMMUP00000000195	ENSMMUT00000000208	ENSMMUG00000000140	ENSMMUP00000000195|ENSMMUT00000000208|ENSMMUG00000000140|EPN2|epsin 2 [Source:HGNC Symbol;Acc:18639];	ENSP00000320543	ENSG00000072134	EPN2	epsin 2 [Source:HGNC Symbol;Acc:18639]	ortholog_one2one	ENSMUSP00000125403	ENSMUSG00000024231	apparent_ortholog_one2one	4	4	2	3	2	YES	YES	2	3	2	12	12	62.294	584	4	4	2	1.9007e-18	6.3	8.9	7.7	22007000	6986600	7194300	7826000	880280	279460	287770	313040
32	ENSMMUP00000000210;ENSMMUP00000039661;ENSMMUP00000000211;ENSMMUP00000039660	ENSMMUP00000000210	ENSMMUT00000000223	ENSMMUG00000000152	ENSMMUP00000000210|ENSMMUT00000000223|ENSMMUG00000000152|Q6UIM5_MACMU|Transcription factor CP2 Fragment [Source:UniProtKB/TrEMBL;Acc:Q6UIM5];	ENSP00000257915	ENSG00000135457	TFCP2	transcription factor CP2 [Source:HGNC Symbol;Acc:11748]	ortholog_one2one	ENSMUSP00000028599	ENSMUSG00000027176	apparent_ortholog_one2one	4	3	3	4	3	YES	YES	2	3	2	12.5	9	57.246	502	8	8	5	3.9211e-54	9.2	12.5	9.2	79257000	38208000	32881000	8168600	3602600	1736700	1494600	371300
33	ENSMMUP00000000214;ENSMMUP00000010119	ENSMMUP00000000214	ENSMMUT00000000227	ENSMMUG00000000156	ENSMMUP00000000214|ENSMMUT00000000227|ENSMMUG00000000156	ENSP00000300408	ENSG00000167085	PHB	prohibitin [Source:HGNC Symbol;Acc:8912]	ortholog_one2one	ENSMUSP00000056604	ENSMUSG00000050799	apparent_ortholog_one2one	10	10	9	9	10	YES	YES	9	9	10	58.8	58.8	29.804	272	40	39	34	1.2364e-237	50	50	58.8	1639200000	783410000	493780000	361970000	86272000	41232000	25989000	19051000
34	ENSMMUP00000000221	ENSMMUP00000000221	ENSMMUT00000000234	ENSMMUG00000000158	ENSMMUP00000000221|ENSMMUT00000000234|ENSMMUG00000000158|MCM2|minichromosome maintenance complex component 2 [Source:HGNC Symbol;Acc:6944]	ENSP00000265056	ENSG00000073111	MCM2	minichromosome maintenance complex component 2 [Source:HGNC Symbol;Acc:6944]	ortholog_one2one	ENSMUSP00000035043	ENSMUSG00000032468	apparent_ortholog_one2one	8	8	5	4	5	YES	YES	5	4	5	10.6	10.6	101.32	904	8	5	8	9.6558e-41	6.7	6.1	7.6	56221000	18228000	28927000	9065600	1081200	350550	556280	174340
36	ENSMMUP00000000231	ENSMMUP00000000231	ENSMMUT00000000244	ENSMMUG00000000168	ENSMMUP00000000231|ENSMMUT00000000244|ENSMMUG00000000168|MGLL|monoglyceride lipase [Source:HGNC Symbol;Acc:17038]	ENSP00000265052	ENSG00000074416	MGLL	monoglyceride lipase [Source:HGNC Symbol;Acc:17038]	ortholog_one2one	ENSMUSP00000000260	ENSMUSG00000000253	apparent_ortholog_one2one	7	7	6	7	7	YES	YES	6	7	7	34.5	34.5	34.438	316	47	50	49	4.9029e-217	29.4	34.5	34.5	1852000000	549100000	714540000	588410000	123470000	36607000	47636000	39227000
38	ENSMMUP00000000238;ENSMMUP00000000240	ENSMMUP00000000238	ENSMMUT00000000251	ENSMMUG00000000169	ENSMMUP00000000238|ENSMMUT00000000251|ENSMMUG00000000169|ARFRP1|ADP-ribosylation factor related protein 1 [Source:HGNC Symbol;Acc:662];	ENSP00000352746	ENSG00000101246	ARFRP1	ADP-ribosylation factor related protein 1 [Source:HGNC Symbol;Acc:662]	ortholog_one2one	ENSMUSP00000006838	ENSMUSG00000032604	apparent_ortholog_one2one	2	2	2	2	2	YES	YES	2	2	2	13.9	13.9	22.598	201	5	4	4	4.1432e-130	13.9	13.9	13.9	17291000	5139500	6866500	5284500	1440900	428290	572210	440380
39	ENSMMUP00000000244	ENSMMUP00000000244	ENSMMUT00000000257	ENSMMUG00000000173	ENSMMUP00000000244|ENSMMUT00000000257|ENSMMUG00000000173|FKBP15|FK506 binding protein 15, 133kDa [Source:HGNC Symbol;Acc:23397]	ENSP00000238256	ENSG00000119321	FKBP15	FK506 binding protein 15, 133kDa [Source:HGNC Symbol;Acc:23397]	ortholog_one2one	ENSMUSP00000103474	ENSMUSG00000052429	apparent_ortholog_one2one	7	7	4	5	6	YES	YES	4	5	6	10.6	10.6	136.22	1246	10	10	13	5.3132e-61	5.5	7.5	8.6	128030000	37450000	37911000	52670000	1939800	567420	574410	798020
40	ENSMMUP00000000258	ENSMMUP00000000258	ENSMMUT00000000273	ENSMMUG00000000183	ENSMMUP00000000258|ENSMMUT00000000273|ENSMMUG00000000183|MLEC|malectin [Source:HGNC Symbol;Acc:28973]	ENSP00000228506	ENSG00000110917	MLEC	malectin [Source:HGNC Symbol;Acc:28973]	ortholog_one2one	ENSMUSP00000020649	ENSMUSG00000020380	apparent_ortholog_one2one	5	5	4	5	5	YES	YES	4	5	5	21.6	21.6	32.138	291	11	8	12	2.2339e-22	17.2	21.6	21.6	391370000	135700000	123160000	132520000	23022000	7982200	7244500	7795100
41	ENSMMUP00000006479;ENSMMUP00000000262;ENSMMUP00000008080	ENSMMUP00000006479	ENSMMUT00000006887	ENSMMUG00000000186	ENSMMUP00000006479|ENSMMUT00000006887|ENSMMUG00000000186|PPP2R5C|protein phosphatase 2, regulatory subunit B, gamma [Source:HGNC Symbol;Acc:9311];									6	5	4	5	3	YES	YES	3	4	2	15	11.5	62.53	539	7	5	3	6.661e-47	8.7	15	8.7	51452000	27240000	14133000	10079000	1774200	939320	487350	347550
43	ENSMMUP00000000265	ENSMMUP00000000265	ENSMMUT00000000280	ENSMMUG00000000188	ENSMMUP00000000265|ENSMMUT00000000280|ENSMMUG00000000188|NXF1|nuclear RNA export factor 1 [Source:HGNC Symbol;Acc:8071]	ENSP00000436679	ENSG00000162231	NXF1	nuclear RNA export factor 1 [Source:HGNC Symbol;Acc:8071]	ortholog_one2one	ENSMUSP00000008733	ENSMUSG00000029131	apparent_ortholog_one2one	5	5	4	4	4	YES	YES	4	4	4	11.5	11.5	70.139	619	7	7	8	9.6757e-68	8.6	8.9	8.9	102300000	34129000	32231000	35944000	2841800	948040	895320	998430
45	ENSMMUP00000000272;ENSMMUP00000000271	ENSMMUP00000000272	ENSMMUT00000000288	ENSMMUG00000000194	ENSMMUP00000000272|ENSMMUT00000000288|ENSMMUG00000000194|SLC27A1|solute carrier family 27 (fatty acid transporter), member 1 [Source:HGNC Symbol;Acc:10995]	ENSP00000252595	ENSG00000130304	SLC27A1	solute carrier family 27 (fatty acid transporter), member 1 [Source:HGNC Symbol;Acc:10995]	ortholog_one2one	ENSMUSP00000021018	ENSMUSG00000020680	apparent_ortholog_one2one	5	5	5	5	4	YES	YES	5	5	4	14	14	70.272	641	11	11	11	3.0256e-83	14	14	11.9	300760000	91647000	134600000	74513000	8128700	2476900	3637900	2013900
46	ENSMMUP00000000273	ENSMMUP00000000273	ENSMMUT00000000289	ENSMMUG00000000195	ENSMMUP00000000273|ENSMMUT00000000289|ENSMMUG00000000195|PGLS|6-phosphogluconolactonase [Source:HGNC Symbol;Acc:8903]	ENSP00000252603	ENSG00000130313	PGLS	6-phosphogluconolactonase [Source:HGNC Symbol;Acc:8903]	ortholog_one2one	ENSMUSP00000056502	ENSMUSG00000002010	apparent_ortholog_one2one	8	8	5	8	4	YES	YES	5	8	4	55.5	55.5	27.39	256	8	11	6	3.5661e-47	39.5	55.5	26.6	193720000	63133000	102900000	27685000	12107000	3945800	6431200	1730300
47	ENSMMUP00000000278;ENSMMUP00000031757	ENSMMUP00000000278	ENSMMUT00000000294	ENSMMUG00000000198	ENSMMUP00000000278|ENSMMUT00000000294|ENSMMUG00000000198|GLT25D1|glycosyltransferase 25 domain containing 1 [Source:HGNC Symbol;Acc:26182]	ENSP00000252599	ENSG00000130309	GLT25D1	glycosyltransferase 25 domain containing 1 [Source:HGNC Symbol;Acc:26182]	ortholog_one2one	ENSMUSP00000021479	ENSMUSG00000021076	apparent_ortholog_one2one	9	9	7	9	7	YES	YES	7	9	7	27.8	27.8	53.427	461	19	31	31	8.9204e-65	21.9	27.8	24.7	722130000	150690000	345920000	225530000	27774000	5795800	13305000	8674100
49	ENSMMUP00000000309;ENSMMUP00000000308;ENSMMUP00000031561	ENSMMUP00000000309	ENSMMUT00000000328	ENSMMUG00000000217	ENSMMUP00000000309|ENSMMUT00000000328|ENSMMUG00000000217|PPP5C|protein phosphatase 5, catalytic subunit [Source:HGNC Symbol;Acc:9322];	ENSP00000012443	ENSG00000011485	PPP5C	protein phosphatase 5, catalytic subunit [Source:HGNC Symbol;Acc:9322]	ortholog_one2one	ENSMUSP00000118169	ENSMUSG00000050335	apparent_ortholog_one2one	5	5	4	5	4	YES	YES	4	5	4	16.4	16.4	56.918	499	11	13	12	2.8034e-93	12.4	16.4	12.4	275060000	78886000	96691000	99482000	8872800	2544700	3119100	3209100
50	ENSMMUP00000000312	ENSMMUP00000000312	ENSMMUT00000000331	ENSMMUG00000000220	ENSMMUP00000000312|ENSMMUT00000000331|ENSMMUG00000000220|MRPL3|mitochondrial ribosomal protein L3 [Source:HGNC Symbol;Acc:10379]	ENSP00000264995	ENSG00000114686	MRPL3	mitochondrial ribosomal protein L3 [Source:HGNC Symbol;Acc:10379]	ortholog_one2one	ENSMUSP00000043583	ENSMUSG00000037608	apparent_ortholog_one2one	2	2	2	2	2	YES	YES	2	2	2	10.9	10.9	38.621	348	2	3	3	8.8872e-09	10.9	10.9	10.9	106180000	29585000	46903000	29693000	4424200	1232700	1954300	1237200
51	ENSMMUP00000000315;ENSMMUP00000000316;ENSMMUP00000033149	ENSMMUP00000000315	ENSMMUT00000000335	ENSMMUG00000000224	ENSMMUP00000000315|ENSMMUT00000000335|ENSMMUG00000000224|REPS1|RALBP1 associated Eps domain containing 1 [Source:HGNC Symbol;Acc:15578];	ENSP00000258062	ENSG00000135597	REPS1	RALBP1 associated Eps domain containing 1 [Source:HGNC Symbol;Acc:15578]	ortholog_one2one	ENSMUSP00000026550	ENSMUSG00000025477	apparent_ortholog_one2one	2	2	1	1	2	YES	YES	1	1	2	4.1	4.1	86.789	796	1	1	2	3.279e-07	2.1	2.1	4.1	6013600	1016200	1589000	3408400	122730	20739	32428	69560
52	ENSMMUP00000000318	ENSMMUP00000000318	ENSMMUT00000000338	ENSMMUG00000000226	ENSMMUP00000000318|ENSMMUT00000000338|ENSMMUG00000000226|GLG1|golgi glycoprotein 1 [Source:HGNC Symbol;Acc:4316]	ENSP00000205061	ENSG00000090863	GLG1	golgi glycoprotein 1 [Source:HGNC Symbol;Acc:4316]	ortholog_one2one	ENSMUSP00000002551	ENSMUSG00000002477	apparent_ortholog_one2one	9	8	7	9	8	YES	YES	6	8	7	11.4	10	138.06	1206	15	16	18	4.6058e-110	8.2	11.4	10	285850000	72232000	90210000	123410000	4026100	1017400	1270600	1738200
53	ENSMMUP00000000326	ENSMMUP00000000326	ENSMMUT00000000347	ENSMMUG00000000232	ENSMMUP00000000326|ENSMMUT00000000347|ENSMMUG00000000232|PGM2|phosphoglucomutase 2 [Source:HGNC Symbol;Acc:8906]	ENSP00000371393	ENSG00000169299	PGM2	phosphoglucomutase 2 [Source:HGNC Symbol;Acc:8906]	ortholog_one2one	ENSMUSP00000002551	ENSMUSG00000002477	apparent_ortholog_one2one	15	15	14	13	12	YES	YES	14	13	12	33.6	33.6	59.732	535	58	50	49	0	33.6	30.5	26.2	2333100000	928840000	700040000	704230000	70700000	28147000	21213000	21340000
56	ENSMMUP00000000338;ENSMMUP00000000337;ENSMMUP00000000340;ENSMMUP00000037992	ENSMMUP00000000338	ENSMMUT00000000361	ENSMMUG00000000245	ENSMMUP00000000338|ENSMMUT00000000361|ENSMMUG00000000245|ASPM_MACMU|Abnormal spindle-like microcephaly-associated protein homolog [Source:UniProtKB/Swiss-Prot;Acc:P62292];	ENSP00000356379	ENSG00000066279	ASPM	asp (abnormal spindle) homolog, microcephaly associated (Drosophila) [Source:HGNC Symbol;Acc:19048]	ortholog_one2one	ENSMUSP00000060346	ENSMUSG00000004789	apparent_ortholog_one2one	3	3	1	2	1	YES	YES	1	2	1	0.7	0.7	409.62	3476	1	2	1	3.2203e-22	0.2	0.5	0.2	15833000	4464100	11243000	125790	72295	20384	51337	574.37
57	ENSMMUP00000031646;ENSMMUP00000000343	ENSMMUP00000031646	ENSMMUT00000038547	ENSMMUG00000000249	ENSMMUP00000031646|ENSMMUT00000038547|ENSMMUG00000000249|LOC720281;	ENSP00000246533	ENSG00000126247	CAPNS1	calpain, small subunit 1 [Source:HGNC Symbol;Acc:1481]	ortholog_one2one	ENSMUSP00000062766	ENSMUSG00000048439	ortholog_one2one	8	8	8	7	8	YES	YES	8	7	8	39.8	39.8	41.222	389	86	87	79	0	39.8	27.2	39.8	1670400000	449600000	780270000	440550000	104400000	28100000	48767000	27535000
58	ENSMMUP00000000344	ENSMMUP00000000344	ENSMMUT00000000367	ENSMMUG00000000250	ENSMMUP00000000344|ENSMMUT00000000367|ENSMMUG00000000250|NP_001035368.1|cytochrome c oxidase subunit 7AH precursor [Source:RefSeq peptide;Acc:NP_001035368]	ENSP00000292907	ENSG00000161281	COX7A1	cytochrome c oxidase subunit VIIa polypeptide 1 (muscle) [Source:HGNC Symbol;Acc:2287]	ortholog_one2one	ENSMUSP00000117971	ENSMUSG00000030879	apparent_ortholog_one2one	2	2	2	2	2	YES	YES	2	2	2	29.1	29.1	9.0463	79	5	6	5	1.5923e-36	29.1	29.1	29.1	114810000	35773000	48266000	30770000	28702000	8943100	12067000	7692500
59	ENSMMUP00000000348;ENSMMUP00000000349	ENSMMUP00000000348	ENSMMUT00000000371	ENSMMUG00000000252	ENSMMUP00000000348|ENSMMUT00000000371|ENSMMUG00000000252|RAE1;	ENSP00000379182	ENSG00000101146	RAE1	RAE1 RNA export 1 homolog (S. pombe) [Source:HGNC Symbol;Acc:9828]	ortholog_one2one	ENSMUSP00000106861	ENSMUSG00000026547	apparent_ortholog_one2one	4	4	3	2	2	YES	YES	3	2	2	20.9	20.9	40.968	368	6	4	4	9.0236e-15	13	9	13.3	154690000	60313000	44272000	50106000	8141600	3174400	2330100	2637200
60	ENSMMUP00000003384;ENSMMUP00000039850;ENSMMUP00000039853;ENSMMUP00000003383;ENSMMUP00000000351;ENSMMUP00000039844;ENSMMUP00000039845;ENSMMUP00000018577	ENSMMUP00000003384	ENSMMUT00000003580	ENSMMUG00000002516	ENSMMUP00000003384|ENSMMUT00000003580|ENSMMUG00000002516|LPHN2|latrophilin 2 [Source:HGNC Symbol;Acc:18582];	ENSP00000322270	ENSG00000117114	LPHN2	latrophilin 2 [Source:HGNC Symbol;Acc:18582]	ortholog_one2one				4	4	3	3	2	YES	YES	3	3	2	4.6	4.6	164.8	1472	4	4	3	6.8881e-14	3.3	3.3	1.9	45751000	20676000	9438700	15636000	653580	295370	134840	223370
61	ENSMMUP00000000356	ENSMMUP00000000356	ENSMMUT00000000383	ENSMMUG00000000262	ENSMMUP00000000356|ENSMMUT00000000383|ENSMMUG00000000262|UPB1|ureidopropionase, beta [Source:HGNC Symbol;Acc:16297]	ENSP00000324343	ENSG00000100024	UPB1	ureidopropionase, beta [Source:HGNC Symbol;Acc:16297]	ortholog_one2one	ENSMUSP00000120595	ENSMUSG00000018379	apparent_ortholog_one2one	5	5	5	3	3	YES	YES	5	3	3	22.8	22.8	43.41	386	6	4	4	3.9118e-43	22.8	16.3	16.3	106500000	42638000	24399000	39461000	5071300	2030400	1161900	1879100
62	ENSMMUP00000000359	ENSMMUP00000000359	ENSMMUT00000000386	ENSMMUG00000000264	ENSMMUP00000000359|ENSMMUT00000000386|ENSMMUG00000000264|SNRPD3|small nuclear ribonucleoprotein D3 polypeptide 18kDa [Source:HGNC Symbol;Acc:11160]	ENSP00000215829	ENSG00000100028	SNRPD3	small nuclear ribonucleoprotein D3 polypeptide 18kDa [Source:HGNC Symbol;Acc:11160]	ortholog_one2one	ENSMUSP00000058432	ENSMUSG00000039001	apparent_ortholog_one2one	2	2	2	2	2	YES	YES	2	2	2	23.8	23.8	13.916	126	23	17	16	1.1395e-63	23.8	23.8	23.8	376720000	179860000	112560000	84300000	41858000	19985000	12507000	9366700
64	ENSMMUP00000000377	ENSMMUP00000000377	ENSMMUT00000000406	ENSMMUG00000000275	ENSMMUP00000000377|ENSMMUT00000000406|ENSMMUG00000000275|OGDHL|oxoglutarate dehydrogenase-like [Source:HGNC Symbol;Acc:25590]	ENSP00000363216	ENSG00000197444	OGDHL	oxoglutarate dehydrogenase-like [Source:HGNC Symbol;Acc:25590]	ortholog_one2one	ENSMUSP00000031034	ENSMUSG00000029148	apparent_ortholog_one2one	6	2	5	4	4	YES	YES	1	1	1	6.9	3.1	114.51	1011	1	1	1	8.1896e-50	5.6	4.5	4.5	2668400	284790	1551300	832250	48516	5178.1	28206	15132
65	ENSMMUP00000000380;ENSMMUP00000000381	ENSMMUP00000000380	ENSMMUT00000000409	ENSMMUG00000000278	ENSMMUP00000000380|ENSMMUT00000000409|ENSMMUG00000000278|TARSL2|threonyl-tRNA synthetase-like 2 [Source:HGNC Symbol;Acc:24728];	ENSP00000338093	ENSG00000185418	TARSL2	threonyl-tRNA synthetase-like 2 [Source:HGNC Symbol;Acc:24728]	ortholog_one2one	ENSMUSP00000127791	ENSMUSG00000008683	apparent_ortholog_one2one	3	2	2	1	2	YES	YES	1	0	1	5.8	4.7	81.307	701	1		1	2.5595e-13	4	1.1	3	45855000	2808900	0	43046000	1175800	72024	0	1103700
66	ENSMMUP00000000386	ENSMMUP00000000386	ENSMMUT00000000416	ENSMMUG00000000284	ENSMMUP00000000386|ENSMMUT00000000416|ENSMMUG00000000284|DCTD|dCMP deaminase [Source:HGNC Symbol;Acc:2710]	ENSP00000349576	ENSG00000129187	DCTD	dCMP deaminase [Source:HGNC Symbol;Acc:2710]	ortholog_one2one	ENSMUSP00000038135	ENSMUSG00000042699	apparent_ortholog_one2one	2	2	2	2	2	YES	YES	2	2	2	13.8	13.8	20.948	189	6	7	5	4.5092e-30	13.8	13.8	13.8	82706000	14625000	27178000	40904000	6892200	1218700	2264800	3408600
67	ENSMMUP00000000392	ENSMMUP00000000392	ENSMMUT00000000423	ENSMMUG00000000290	ENSMMUP00000000392|ENSMMUT00000000423|ENSMMUG00000000290|RBP1|retinol binding protein 1, cellular [Source:HGNC Symbol;Acc:9919]	ENSP00000232219	ENSG00000114115	RBP1	retinol binding protein 1, cellular [Source:HGNC Symbol;Acc:9919]	ortholog_one2one	ENSMUSP00000062576	ENSMUSG00000026434	apparent_ortholog_one2one	12	12	12	11	12	YES	YES	12	11	12	66.7	66.7	15.822	135	106	105	95	0	66.7	66.7	66.7	9522100000	2850000000	4658200000	2013900000	793500000	237500000	388180000	167830000
68	ENSMMUP00000036414;ENSMMUP00000000397	ENSMMUP00000036414	ENSMMUT00000043414	ENSMMUG00000000293	ENSMMUP00000036414|ENSMMUT00000043414|ENSMMUG00000000293|CTNNA2|catenin (cadherin-associated protein), alpha 2 [Source:HGNC Symbol;Acc:2510];	ENSP00000418191	ENSG00000066032	CTNNA2	catenin (cadherin-associated protein), alpha 2 [Source:HGNC Symbol;Acc:2510]	ortholog_one2one				3	1	3	3	3	YES	YES	1	1	1	4.2	1.9	105.31	953	2	2	2	1.3112e-33	4.2	4.2	4.2	42063000	12704000	19487000	9872400	737950	222870	341880	173200
69	ENSMMUP00000000400;ENSMMUP00000033336;ENSMMUP00000032074;ENSMMUP00000000399	ENSMMUP00000000400	ENSMMUT00000000431	ENSMMUG00000000294	ENSMMUP00000000400|ENSMMUT00000000431|ENSMMUG00000000294;	ENSP00000225430	ENSG00000108298	RPL19	ribosomal protein L19 [Source:HGNC Symbol;Acc:10312]	ortholog_one2one	ENSMUSP00000038533	ENSMUSG00000005501	apparent_ortholog_one2one	2	2	1	2	2	YES	YES	1	2	2	13.3	13.3	23.256	196	2	3	2	1.1848e-09	8.7	13.3	13.3	40224000	6282000	20168000	13774000	4469400	698000	2240900	1530500
70	ENSMMUP00000000412;ENSMMUP00000033827	ENSMMUP00000000412	ENSMMUT00000000445	ENSMMUG00000000306	ENSMMUP00000000412|ENSMMUT00000000445|ENSMMUG00000000306|FAM82A2|family with sequence similarity 82, member A2 [Source:HGNC Symbol;Acc:25550]	ENSP00000260385	ENSG00000137824	RMDN3	regulator of microtubule dynamics 3 [Source:HGNC Symbol;Acc:25550]	ortholog_one2one	ENSMUSP00000021339	ENSMUSG00000020956	apparent_ortholog_one2one	9	9	8	8	7	YES	YES	8	8	7	23.1	23.1	52.083	471	14	13	13	2.7681e-85	19.5	23.1	20.8	492830000	161000000	156150000	175680000	18955000	6192300	6005800	6756900
71	ENSMMUP00000000419;ENSMMUP00000000420;ENSMMUP00000000421	ENSMMUP00000000419	ENSMMUT00000000452	ENSMMUG00000000312	ENSMMUP00000000419|ENSMMUT00000000452|ENSMMUG00000000312|ABI2|abl-interactor 2 [Source:HGNC Symbol;Acc:24011];	ENSP00000261017	ENSG00000138443	ABI2	abl-interactor 2 [Source:HGNC Symbol;Acc:24011]	ortholog_one2one	ENSMUSP00000021339	ENSMUSG00000020956	apparent_ortholog_one2one	3	3	2	3	3	YES	YES	2	3	3	6.2	6.2	55.652	513	2	3	3	3.8766e-17	6.2	6.2	6.2	47895000	15569000	18921000	13405000	2280700	741360	900990	638350
72	ENSMMUP00000037843;ENSMMUP00000000426;ENSMMUP00000037835;ENSMMUP00000000427;ENSMMUP00000000424;ENSMMUP00000037837	ENSMMUP00000037843	ENSMMUT00000044822	ENSMMUG00000000314	ENSMMUP00000037843|ENSMMUT00000044822|ENSMMUG00000000314|LOC723688;	ENSP00000316543	ENSG00000173166	RAPH1	Ras association (RalGDS/AF-6) and pleckstrin homology domains 1 [Source:HGNC Symbol;Acc:14436]	ortholog_one2one				2	2	2	1	2	YES	YES	2	1	2	2.2	2.2	138.02	1270	3	3	6	6.2849e-40	2.2	1.3	2.2	17214000	3361900	7133800	6718200	264830	51722	109750	103360
74	ENSMMUP00000000430;ENSMMUP00000000429	ENSMMUP00000000430	ENSMMUT00000000464	ENSMMUG00000000319	ENSMMUP00000000430|ENSMMUT00000000464|ENSMMUG00000000319|HCFC1|host cell factor C1 (VP16-accessory protein) [Source:HGNC Symbol;Acc:4839];	ENSP00000309555	ENSG00000172534	HCFC1	host cell factor C1 (VP16-accessory protein) [Source:HGNC Symbol;Acc:4839]	ortholog_one2one	ENSMUSP00000129007	ENSMUSG00000016756	apparent_ortholog_one2one	9	9	8	6	5	YES	YES	8	6	5	10	10	161.03	1579	17	20	20	9.5227e-84	8.7	6.8	5.9	419320000	151620000	171050000	96650000	6551900	2369100	2672700	1510200
75	ENSMMUP00000000431	ENSMMUP00000000431	ENSMMUT00000000465	ENSMMUG00000000320	ENSMMUP00000000431|ENSMMUT00000000465|ENSMMUG00000000320|RENBP|renin binding protein [Source:HGNC Symbol;Acc:9959]	ENSP00000377303	ENSG00000102032	RENBP	renin binding protein [Source:HGNC Symbol;Acc:9959]	ortholog_one2one	ENSMUSP00000105312	ENSMUSG00000033088	apparent_ortholog_one2one	4	4	4	3	3	YES	YES	4	3	3	9.4	9.4	47.964	417	9	6	6	5.1201e-17	9.4	9.4	8.6	53870000	25603000	18813000	9454400	1857600	882850	648730	326010
77	ENSMMUP00000000435;ENSMMUP00000000436	ENSMMUP00000000435	ENSMMUT00000000471	ENSMMUG00000000323	ENSMMUP00000000435|ENSMMUT00000000471|ENSMMUG00000000323|ARHGAP4|Rho GTPase activating protein 4 [Source:HGNC Symbol;Acc:674];	ENSP00000359045	ENSG00000089820	ARHGAP4	Rho GTPase activating protein 4 [Source:HGNC Symbol;Acc:674]	ortholog_one2one	ENSMUSP00000096397	ENSMUSG00000074364	apparent_ortholog_one2one	2	2	1	1	2	YES	YES	1	1	2	2.8	2.8	98.405	885	5	5	6	1.6163e-105	1.2	1.2	2.8	18934000	4178300	7626300	7129500	420760	92850	169470	158430
78	ENSMMUP00000000442;ENSMMUP00000000444;ENSMMUP00000000440	ENSMMUP00000000442	ENSMMUT00000000478	ENSMMUG00000000318	ENSMMUP00000000442|ENSMMUT00000000478|ENSMMUG00000000318|TENC1|tensin like C1 domain containing phosphatase (tensin 2) [Source:HGNC Symbol;Acc:19737];	ENSP00000319756	ENSG00000111077	TENC1	tensin like C1 domain containing phosphatase (tensin 2) [Source:HGNC Symbol;Acc:19737]	ortholog_one2one	ENSMUSP00000105531	ENSMUSG00000058569	apparent_ortholog_one2one	6	6	6	5	5	YES	YES	6	5	5	7.5	7.5	153.3	1419	11	10	10	9.4386e-70	7.5	5.3	5.6	146870000	48761000	39987000	58126000	1932500	641590	526140	764810
79	ENSMMUP00000000452;ENSMMUP00000000455;ENSMMUP00000034107	ENSMMUP00000000452	ENSMMUT00000000488	ENSMMUG00000000332	ENSMMUP00000000452|ENSMMUT00000000488|ENSMMUG00000000332|TGFBI|transforming growth factor, beta-induced, 68kDa [Source:HGNC Symbol;Acc:11771];	ENSP00000416330	ENSG00000120708	TGFBI	transforming growth factor, beta-induced, 68kDa [Source:HGNC Symbol;Acc:11771]	ortholog_one2one	ENSMUSP00000073581	ENSMUSG00000061983	apparent_ortholog_one2one	13	13	12	11	11	YES	YES	12	11	11	39	39	74.799	684	45	34	43	8.365e-252	33.2	32	30.6	1530100000	461230000	618830000	450080000	39234000	11826000	15868000	11541000
80	ENSMMUP00000000453;ENSMMUP00000037020;ENSMMUP00000037021	ENSMMUP00000000453	ENSMMUT00000000489	ENSMMUG00000000336	ENSMMUP00000000453|ENSMMUT00000000489|ENSMMUG00000000336|UEVLD|UEV and lactate/malate dehyrogenase domains [Source:HGNC Symbol;Acc:30866];	ENSP00000379500	ENSG00000151116	UEVLD	UEV and lactate/malate dehyrogenase domains [Source:HGNC Symbol;Acc:30866]	ortholog_one2one	ENSMUSP00000022894	ENSMUSG00000022285	apparent_ortholog_one2one	2	2	1	2	1	YES	YES	1	2	1	6.1	6.1	41.904	375	1	3	1	4.9366e-05	2.7	6.1	2.7	4663000	1984500	2678600	0	186520	79378	107140	0
81	ENSMMUP00000000454;ENSMMUP00000000451	ENSMMUP00000000454	ENSMMUT00000000490	ENSMMUG00000000335	ENSMMUP00000000454|ENSMMUT00000000490|ENSMMUG00000000335|TRIM5_MACMU|Tripartite motif-containing protein 5 (EC 6.3.2.-)(TRIM5alpha) [Source:UniProtKB/Swiss-Prot;Acc:Q0PF16];	ENSP00000369373	ENSG00000132256	TRIM5	tripartite motif containing 5 [Source:HGNC Symbol;Acc:16276]	ortholog_one2one	ENSMUSP00000019109	ENSMUSG00000018965	apparent_ortholog_one2one	3	3	3	3	3	YES	YES	3	3	3	11.5	11.5	57.298	497	13	12	10	3.7023e-72	11.5	11.5	11.5	145980000	55330000	54238000	36409000	4708900	1784800	1749600	1174500
82	ENSMMUP00000000458;ENSMMUP00000000460;ENSMMUP00000000459	ENSMMUP00000000458	ENSMMUT00000000494	ENSMMUG00000000338	ENSMMUP00000000458|ENSMMUT00000000494|ENSMMUG00000000338|NP_001106830.1|tripartite motif-containing 22 [Source:RefSeq peptide;Acc:NP_001106830];	ENSP00000369299	ENSG00000132274	TRIM22	tripartite motif containing 22 [Source:HGNC Symbol;Acc:16379]	ortholog_one2one	ENSMUSP00000072729	ENSMUSG00000041236	apparent_ortholog_one2one	5	5	5	3	2	YES	YES	5	3	2	13.9	13.9	57.052	498	7	4	4	3.3318e-64	13.9	10.4	6.6	110270000	39403000	33864000	37002000	3341500	1194000	1026200	1121300
83	ENSMMUP00000000461	ENSMMUP00000000461	ENSMMUT00000000497	ENSMMUG00000000340	ENSMMUP00000000461|ENSMMUT00000000497|ENSMMUG00000000340	ENSP00000441954	ENSG00000113658	SMAD5	SMAD family member 5 [Source:HGNC Symbol;Acc:6771]	ortholog_one2one	ENSMUSP00000105536	ENSMUSG00000009073	apparent_ortholog_one2one	3	1	2	2	2	YES	YES	1	0	1	8.4	3.2	52.258	465	2	1	5	1.3163e-28	6	5.2	6	22979000	7724600	678420	14576000	919160	308980	27137	583040
84	ENSMMUP00000000469	ENSMMUP00000000469	ENSMMUT00000000508	ENSMMUG00000000348	ENSMMUP00000000469|ENSMMUT00000000508|ENSMMUG00000000348|KDELC1|KDEL (Lys-Asp-Glu-Leu) containing 1 [Source:HGNC Symbol;Acc:19350]	ENSP00000365172	ENSG00000134901	KDELC1	KDEL (Lys-Asp-Glu-Leu) containing 1 [Source:HGNC Symbol;Acc:19350]	ortholog_one2one	ENSMUSP00000050036	ENSMUSG00000044629	apparent_ortholog_one2one	4	4	3	3	3	YES	YES	3	3	3	13.3	13.3	58.07	502	5	5	7	1.6257e-80	10	10	10	38825000	11225000	12690000	14910000	1109300	320720	362580	425990
87	ENSMMUP00000000483	ENSMMUP00000000483	ENSMMUT00000000526	ENSMMUG00000000364	ENSMMUP00000000483|ENSMMUT00000000526|ENSMMUG00000000364|TOMM22|translocase of outer mitochondrial membrane 22 homolog (yeast) [Source:HGNC Symbol;Acc:18002]	ENSP00000216034	ENSG00000100216	TOMM22	translocase of outer mitochondrial membrane 22 homolog (yeast) [Source:HGNC Symbol;Acc:18002]	ortholog_one2one	ENSMUSP00000032715	ENSMUSG00000030505	apparent_ortholog_one2one	4	4	3	3	4	YES	YES	3	3	4	40.8	40.8	15.521	142	14	11	12	9.9803e-142	40.1	40.8	40.8	319840000	135040000	95412000	89390000	45692000	19292000	13630000	12770000
88	ENSMMUP00000000486	ENSMMUP00000000486	ENSMMUT00000000529	ENSMMUG00000003854	ENSMMUP00000000486|ENSMMUT00000000529|ENSMMUG00000003854|SH3BP1|SH3-domain binding protein 1 [Source:HGNC Symbol;Acc:10824]	ENSP00000350018	ENSG00000100092	SH3BP1	SH3-domain binding protein 1 [Source:HGNC Symbol;Acc:10824]	ortholog_one2one	ENSMUSP00000030455	ENSMUSG00000028692	apparent_ortholog_one2one	3	1	2	1	1	YES	YES	0	1	0	12.3	6.7	31.959	300		1		1.2117e-12	5.7	6.7	3.3	3022800	0	3022800	0	188920	0	188920	0
89	ENSMMUP00000000494	ENSMMUP00000000494	ENSMMUT00000000538	ENSMMUG00000000373	ENSMMUP00000000494|ENSMMUT00000000538|ENSMMUG00000000373|SLC2A1|solute carrier family 2 (facilitated glucose transporter), member 1 [Source:HGNC Symbol;Acc:11005]	ENSP00000416293	ENSG00000117394	SLC2A1	solute carrier family 2 (facilitated glucose transporter), member 1 [Source:HGNC Symbol;Acc:11005]	ortholog_one2one	ENSMUSP00000032372	ENSMUSG00000030245	apparent_ortholog_one2one	2	2	2	2	2	YES	YES	2	2	2	1.8	1.8	54.153	492	5	3	4	1.0856e-17	1.8	1.8	1.8	17550000	7852100	3956600	5741600	1350000	604000	304350	441660
90	ENSMMUP00000000498;ENSMMUP00000000502;ENSMMUP00000000503	ENSMMUP00000000498	ENSMMUT00000000543	ENSMMUG00000000376	ENSMMUP00000000498|ENSMMUT00000000543|ENSMMUG00000000376|BIN1|bridging integrator 1 [Source:HGNC Symbol;Acc:1052];	ENSP00000316779	ENSG00000136717	BIN1	bridging integrator 1 [Source:HGNC Symbol;Acc:1052]	ortholog_one2one	ENSMUSP00000111120	ENSMUSG00000045983	apparent_ortholog_one2one	4	4	3	4	3	YES	YES	3	4	3	18.3	18.3	42.136	377	6	8	7	3.1192e-43	14.6	18.3	14.6	226330000	59072000	84966000	82291000	8705000	2272000	3267900	3165000
91	ENSMMUP00000000514	ENSMMUP00000000514	ENSMMUT00000000560	ENSMMUG00000000386	ENSMMUP00000000514|ENSMMUT00000000560|ENSMMUG00000000386|ATG4C|ATG4 autophagy related 4 homolog C (S. cerevisiae) [Source:HGNC Symbol;Acc:16040]	ENSP00000322159	ENSG00000125703	ATG4C	autophagy related 4C, cysteine peptidase [Source:HGNC Symbol;Acc:16040]	ortholog_one2one	ENSMUSP00000081239	ENSMUSG00000066037	apparent_ortholog_one2one	2	2	2	1	1	YES	YES	2	1	1	10.3	10.3	52.569	458	2	1	2	4.2772e-05	10.3	5.2	5.2	24276000	4857200	5292000	14127000	837110	167490	182480	487140
93	ENSMMUP00000000522;ENSMMUP00000039370;ENSMMUP00000000524	ENSMMUP00000000522	ENSMMUT00000000568	ENSMMUG00000000389	ENSMMUP00000000522|ENSMMUT00000000568|ENSMMUG00000000389|NOL6|nucleolar protein family 6 (RNA-associated) [Source:HGNC Symbol;Acc:19910];	ENSP00000297990	ENSG00000165271	NOL6	nucleolar protein family 6 (RNA-associated) [Source:HGNC Symbol;Acc:19910]	ortholog_one2one	ENSMUSP00000026485	ENSMUSG00000025421	apparent_ortholog_one2one	3	3	2	3	2	YES	YES	2	3	2	4.5	4.5	127.55	1146	6	7	5	3.1586e-09	2.4	4.5	3.3	22535000	5574000	10380000	6580900	402410	99536	185360	117520
94	ENSMMUP00000000535	ENSMMUP00000000535	ENSMMUT00000000582	ENSMMUG00000000399	ENSMMUP00000000535|ENSMMUT00000000582|ENSMMUG00000000399|KIF2A|kinesin heavy chain member 2A [Source:HGNC Symbol;Acc:6318]	ENSP00000385000	ENSG00000068796	KIF2A	kinesin heavy chain member 2A [Source:HGNC Symbol;Acc:6318]	ortholog_one2one	ENSMUSP00000099991	ENSMUSG00000024122	apparent_ortholog_one2one	4	4	1	4	2	YES	YES	1	4	2	9	9	77.788	686	1	6	4	9.1602e-11	2.3	9	3.5	18941000	1814300	13994000	3132400	430480	41234	318060	71192
95	ENSMMUP00000033948;ENSMMUP00000000564	ENSMMUP00000033948	ENSMMUT00000040918	ENSMMUG00000000419	ENSMMUP00000033948|ENSMMUT00000040918|ENSMMUG00000000419|ARHGAP26|Rho GTPase activating protein 26 [Source:HGNC Symbol;Acc:17073];	ENSP00000274498	ENSG00000145819	ARHGAP26	Rho GTPase activating protein 26 [Source:HGNC Symbol;Acc:17073]	ortholog_one2one	ENSMUSP00000102393	ENSMUSG00000043572	ortholog_one2one	2	2	2	2	1	YES	YES	2	2	1	3.1	3.1	92.272	814	4	4	1	0.00011037	3.1	3.1	1.6	36415000	11532000	16043000	8839900	714020	226110	314580	173330
96	ENSMMUP00000000566;ENSMMUP00000000565	ENSMMUP00000000566	ENSMMUT00000000615	ENSMMUG00000000420	ENSMMUP00000000566|ENSMMUT00000000615|ENSMMUG00000000420|XM_001093660.1;						ENSMUSP00000035263	ENSMUSG00000037824	apparent_ortholog_one2one	13	6	12	13	11	YES	YES	6	6	6	55	25.4	35.812	327	152	114	140	0	53.5	55	49.2	35924000000	12315000000	10595000000	13014000000	2245300000	769700000	662190000	813370000
97	ENSMMUP00000000568;ENSMMUP00000035575;ENSMMUP00000007378;ENSMMUP00000003086;ENSMMUP00000000570;ENSMMUP00000007377;ENSMMUP00000016291;ENSMMUP00000032993;ENSMMUP00000039972;ENSMMUP00000040012;ENSMMUP00000040489;ENSMMUP00000005179;ENSMMUP00000013030	ENSMMUP00000000568	ENSMMUT00000000617	ENSMMUG00000000422	ENSMMUP00000000568|ENSMMUT00000000617|ENSMMUG00000000422|XM_001114984.1;						ENSMUSP00000002473	ENSMUSG00000031820	apparent_ortholog_one2one	4	4	3	3	4	YES	YES	3	3	4	40	40	17.832	165	12	8	13	5.2068e-80	30.3	30.3	40	1318600000	489040000	427720000	401840000	119870000	44458000	38884000	36531000
99	ENSMMUP00000000574	ENSMMUP00000000574	ENSMMUT00000000623	ENSMMUG00000000427	ENSMMUP00000000574|ENSMMUT00000000623|ENSMMUG00000000427|BUD31|BUD31 homolog (S. cerevisiae) [Source:HGNC Symbol;Acc:29629]	ENSP00000386023	ENSG00000106245	BUD31	BUD31 homolog (S. cerevisiae) [Source:HGNC Symbol;Acc:29629]	apparent_ortholog_one2one	ENSMUSP00000055036	ENSMUSG00000039108	apparent_ortholog_one2one	5	5	4	4	5	YES	YES	4	4	5	26.4	26.4	17	144	10	9	9	3.4431e-36	26.4	26.4	26.4	79491000	25268000	29416000	24807000	8832300	2807600	3268400	2756300
100	ENSMMUP00000000575	ENSMMUP00000000575	ENSMMUT00000000624	ENSMMUG00000000425	ENSMMUP00000000575|ENSMMUT00000000624|ENSMMUG00000000425	ENSP00000397879	ENSG00000156931	VPS8	vacuolar protein sorting 8 homolog (S. cerevisiae) [Source:HGNC Symbol;Acc:29122]	ortholog_one2one	ENSMUSP00000032555	ENSMUSG00000002984	apparent_ortholog_one2one	9	9	5	4	7	YES	YES	5	4	7	11	11	161.54	1426	8	6	9	3.3994e-34	6	5.1	8.9	59528000	21695000	20070000	17762000	684230	249370	230690	204160
101	ENSMMUP00000000576;ENSMMUP00000000580;ENSMMUP00000000579	ENSMMUP00000000576	ENSMMUT00000000625	ENSMMUG00000000428	ENSMMUP00000000576|ENSMMUT00000000625|ENSMMUG00000000428|QKI|quaking homolog, KH domain RNA binding (mouse) [Source:HGNC Symbol;Acc:21100];	ENSP00000355094	ENSG00000112531	QKI	QKI, KH domain containing, RNA binding [Source:HGNC Symbol;Acc:21100]	apparent_ortholog_one2one	ENSMUSP00000100538	ENSMUSG00000078134	apparent_ortholog_one2one	3	3	3	1	1	YES	YES	3	1	1	18.9	18.9	33.141	302	5	1	1	4.2286e-11	18.9	5.3	7.9	21919000	12099000	7254300	2565100	1461200	806610	483620	171010
103	ENSMMUP00000000602;ENSMMUP00000000601	ENSMMUP00000000602	ENSMMUT00000000652	ENSMMUG00000000449	ENSMMUP00000000602|ENSMMUT00000000652|ENSMMUG00000000449|PARP10|poly (ADP-ribose) polymerase family, member 10 [Source:HGNC Symbol;Acc:25895];	ENSP00000325618	ENSG00000178685	PARP10	poly (ADP-ribose) polymerase family, member 10 [Source:HGNC Symbol;Acc:25895]	ortholog_one2one	ENSMUSP00000085986	ENSMUSG00000067851	apparent_ortholog_one2one	7	7	6	4	4	YES	YES	6	4	4	13.6	13.6	109.39	1019	7	7	9	4.1348e-35	11.7	7.4	7.7	130040000	50693000	33653000	45697000	2600900	1013900	673070	913940
104	ENSMMUP00000000614;ENSMMUP00000035760	ENSMMUP00000000614	ENSMMUT00000000664	ENSMMUG00000000454	ENSMMUP00000000614|ENSMMUT00000000664|ENSMMUG00000000454|PDLIM1|PDZ and LIM domain 1 [Source:HGNC Symbol;Acc:2067];	ENSP00000360305	ENSG00000107438	PDLIM1	PDZ and LIM domain 1 [Source:HGNC Symbol;Acc:2067]	ortholog_one2one	ENSMUSP00000102987	ENSMUSG00000019173	apparent_ortholog_one2one	6	6	4	3	4	YES	YES	4	3	4	32.1	32.1	36.111	330	14	13	14	1.086e-47	27.6	14.2	17.9	954920000	529060000	163970000	261900000	50259000	27845000	8630000	13784000
105	ENSMMUP00000000618;ENSMMUP00000023313	ENSMMUP00000000618	ENSMMUT00000000668	ENSMMUG00000000455	ENSMMUP00000000618|ENSMMUT00000000668|ENSMMUG00000000455|KDM3B|lysine (K)-specific demethylase 3B [Source:HGNC Symbol;Acc:1337];	ENSP00000326563	ENSG00000120733	KDM3B	lysine (K)-specific demethylase 3B [Source:HGNC Symbol;Acc:1337]	ortholog_one2one	ENSMUSP00000023538	ENSMUSG00000022836	apparent_ortholog_one2one	15	15	8	13	12	YES	YES	8	13	12	14.7	14.7	192.1	1763	11	16	15	5.6488e-67	7.9	11.9	12.5	202250000	49727000	78512000	74014000	2174800	534700	844220	795850
106	ENSMMUP00000000623;ENSMMUP00000000626;ENSMMUP00000000624;ENSMMUP00000017455	ENSMMUP00000000623	ENSMMUT00000000673	ENSMMUG00000000458	ENSMMUP00000000623|ENSMMUT00000000673|ENSMMUG00000000458|RBPMS|RNA binding protein with multiple splicing [Source:HGNC Symbol;Acc:19097];	ENSP00000340176	ENSG00000157110	RBPMS	RNA binding protein with multiple splicing [Source:HGNC Symbol;Acc:19097]	ortholog_one2one	ENSMUSP00000100902	ENSMUSG00000020166	apparent_ortholog_one2one	3	3	2	3	3	YES	YES	2	3	3	17.3	17.3	21.802	196	4	3	4	8.3775e-06	10.7	17.3	17.3	17566000	5747600	4937300	6880900	1596900	522510	448850	625530
107	ENSMMUP00000000627	ENSMMUP00000000627	ENSMMUT00000000677	ENSMMUG00000000459	ENSMMUP00000000627|ENSMMUT00000000677|ENSMMUG00000000459|GTF2E2|general transcription factor IIE, polypeptide 2, beta 34kDa [Source:HGNC Symbol;Acc:4651]	ENSP00000348168	ENSG00000197265	GTF2E2	general transcription factor IIE, polypeptide 2, beta 34kDa [Source:HGNC Symbol;Acc:4651]	ortholog_one2one	ENSMUSP00000058613	ENSMUSG00000049313	apparent_ortholog_one2one	2	2	2	2	2	YES	YES	2	2	2	14.4	14.4	33.014	291	3	4	3	1.3003e-23	14.4	14.4	14.4	25587000	6041100	11375000	8170400	1163000	274590	517050	371380
108	ENSMMUP00000000630	ENSMMUP00000000630	ENSMMUT00000000680	ENSMMUG00000000461	ENSMMUP00000000630|ENSMMUT00000000680|ENSMMUG00000000461|CNPY3|canopy 3 homolog (zebrafish) [Source:HGNC Symbol;Acc:11968]	ENSP00000361926	ENSG00000137161	CNPY3	canopy 3 homolog (zebrafish) [Source:HGNC Symbol;Acc:11968]	ortholog_one2one	ENSMUSP00000030134	ENSMUSG00000028426	apparent_ortholog_one2one	2	2	2	2	1	YES	YES	2	2	1	13.5	13.5	30.453	274	3	3	2	1.1201e-57	13.5	13.5	6.6	127280000	51700000	38293000	37292000	9791100	3976900	2945600	2868600
109	ENSMMUP00000000633;ENSMMUP00000000635	ENSMMUP00000000633	ENSMMUT00000000684	ENSMMUG00000000464	ENSMMUP00000000633|ENSMMUT00000000684|ENSMMUG00000000464|ROD1|ROD1 regulator of differentiation 1 (S. pombe) [Source:HGNC Symbol;Acc:10253];	ENSP00000414921	ENSG00000119314	PTBP3	polypyrimidine tract binding protein 3 [Source:HGNC Symbol;Acc:10253]	ortholog_one2one	ENSMUSP00000054424	ENSMUSG00000048109	apparent_ortholog_one2one	3	2	3	3	3	YES	YES	2	2	2	9.7	8.2	58.144	536	3	2	3	7.2608e-29	9.7	9.7	9.7	109000000	38561000	18340000	52100000	5736900	2029500	965240	2742100
110	ENSMMUP00000000653	ENSMMUP00000000653	ENSMMUT00000000705	ENSMMUG00000000478	ENSMMUP00000000653|ENSMMUT00000000705|ENSMMUG00000000478						ENSMUSP00000104795	ENSMUSG00000042901	apparent_ortholog_one2one	2	2	2	2	2	YES	YES	2	2	2	8	8	34.98	311	13	8	14	1.1635e-12	8	8	8	151270000	45601000	51343000	54323000	7203200	2171500	2444900	2586800
111	ENSMMUP00000000654	ENSMMUP00000000654	ENSMMUT00000000706	ENSMMUG00000000479	ENSMMUP00000000654|ENSMMUT00000000706|ENSMMUG00000000479|MACROD1|MACRO domain containing 1 [Source:HGNC Symbol;Acc:29598]	ENSP00000255681	ENSG00000133315	MACROD1	MACRO domain containing 1 [Source:HGNC Symbol;Acc:29598]	ortholog_one2one	ENSMUSP00000126036	ENSMUSG00000025538	apparent_ortholog_one2one	2	2	2	2	2	YES	YES	2	2	2	11.4	11.4	35.516	325	8	6	6	3.7737e-46	11.4	11.4	11.4	185370000	102590000	45138000	37640000	9756200	5399500	2375700	1981000
112	ENSMMUP00000000656;ENSMMUP00000000657	ENSMMUP00000000656	ENSMMUT00000000708	ENSMMUG00000000481	ENSMMUP00000000656|ENSMMUT00000000708|ENSMMUG00000000481;						ENSMUSP00000024657	ENSMUSG00000023883	apparent_ortholog_one2one	2	2	2	1	2	YES	YES	2	1	2	3.5	3.5	54.289	479	3	2	3	8.6674e-20	3.5	3.5	3.5	4948700	1206400	2999000	743250	170640	41601	103410	25629
113	ENSMMUP00000000663	ENSMMUP00000000663	ENSMMUT00000000715	ENSMMUG00000000486	ENSMMUP00000000663|ENSMMUT00000000715|ENSMMUG00000000486	ENSP00000297258	ENSG00000164687	FABP5	fatty acid binding protein 5 (psoriasis-associated) [Source:HGNC Symbol;Acc:3560]	ortholog_one2one	ENSMUSP00000099909	ENSMUSG00000020460	apparent_ortholog_one2one	12	12	12	12	11	YES	YES	12	12	11	74.1	74.1	15.123	135	75	83	62	0	74.1	74.1	73.3	10952000000	5044500000	3431000000	2476900000	995670000	458590000	311910000	225170000
115	ENSMMUP00000000697;ENSMMUP00000038693	ENSMMUP00000000697	ENSMMUT00000000752	ENSMMUG00000000512	ENSMMUP00000000697|ENSMMUT00000000752|ENSMMUG00000000512|CORO1C|coronin, actin binding protein, 1C [Source:HGNC Symbol;Acc:2254];	ENSP00000261401	ENSG00000110880	CORO1C	coronin, actin binding protein, 1C [Source:HGNC Symbol;Acc:2254]	ortholog_one2one	ENSMUSP00000067013	ENSMUSG00000054364	apparent_ortholog_one2one	7	7	7	7	7	YES	YES	7	7	7	25.7	25.7	53.261	474	42	40	40	1.3091e-280	25.7	25.7	25.7	6096500000	1867600000	2441500000	1787400000	254020000	77816000	101730000	74474000
116	ENSMMUP00000037746;ENSMMUP00000000698;ENSMMUP00000037745	ENSMMUP00000037746	ENSMMUT00000044727	ENSMMUG00000000511	ENSMMUP00000037746|ENSMMUT00000044727|ENSMMUG00000000511|CARS|cysteinyl-tRNA synthetase [Source:HGNC Symbol;Acc:1493];	ENSP00000369897	ENSG00000110619	CARS	cysteinyl-tRNA synthetase [Source:HGNC Symbol;Acc:1493]	ortholog_one2one				10	10	9	8	8	YES	YES	9	8	8	18	18	93.908	823	20	19	20	3.2723e-123	16.9	14.1	15.2	210110000	63873000	98599000	47636000	4377200	1330700	2054100	992410
118	ENSMMUP00000000702	ENSMMUP00000000702	ENSMMUT00000000759	ENSMMUG00000000517	ENSMMUP00000000702|ENSMMUT00000000759|ENSMMUG00000000517|FAM126A|family with sequence similarity 126, member A [Source:HGNC Symbol;Acc:24587]	ENSP00000403396	ENSG00000122591	FAM126A	family with sequence similarity 126, member A [Source:HGNC Symbol;Acc:24587]	ortholog_one2one	ENSMUSP00000065810	ENSMUSG00000024758	apparent_ortholog_one2one	3	3	2	2	3	YES	YES	2	2	3	9.6	9.6	57.634	521	4	5	5	1.3151e-40	6.3	6.3	9.6	98285000	37004000	34988000	26293000	3170500	1193700	1128600	848170
121	ENSMMUP00000000712;ENSMMUP00000032544	ENSMMUP00000000712	ENSMMUT00000000769	ENSMMUG00000000525	ENSMMUP00000000712|ENSMMUT00000000769|ENSMMUG00000000525|COG7|component of oligomeric golgi complex 7 [Source:HGNC Symbol;Acc:18622]	ENSP00000305442	ENSG00000168434	COG7	component of oligomeric golgi complex 7 [Source:HGNC Symbol;Acc:18622]	ortholog_one2one	ENSMUSP00000048469	ENSMUSG00000037805	apparent_ortholog_one2one	7	7	4	4	5	YES	YES	4	4	5	18.5	18.5	86.005	766	10	11	15	3.8986e-79	10.3	9.4	12.1	75518000	23918000	29663000	21938000	1841900	583360	723480	535070
126	ENSMMUP00000000736	ENSMMUP00000000736	ENSMMUT00000000795	ENSMMUG00000000544	ENSMMUP00000000736|ENSMMUT00000000795|ENSMMUG00000000544|COL6A1|collagen, type VI, alpha 1 [Source:HGNC Symbol;Acc:2211]	ENSP00000355180	ENSG00000142156	COL6A1	collagen, type VI, alpha 1 [Source:HGNC Symbol;Acc:2211]	ortholog_one2one	ENSMUSP00000099819	ENSMUSG00000020402	apparent_ortholog_one2one	23	23	21	20	18	YES	YES	21	20	18	31.9	31.9	105.74	995	214	191	189	0	28.6	26.4	25.9	42666000000	15293000000	14754000000	12620000000	748530000	268290000	258840000	221390000
128	ENSMMUP00000000784	ENSMMUP00000000784	ENSMMUT00000000845	ENSMMUG00000000582	ENSMMUP00000000784|ENSMMUT00000000845|ENSMMUG00000000582|NOP58|NOP58 ribonucleoprotein homolog (yeast) [Source:HGNC Symbol;Acc:29926]	ENSP00000264279	ENSG00000055044	NOP58	NOP58 ribonucleoprotein [Source:HGNC Symbol;Acc:29926]	ortholog_one2one	ENSMUSP00000046016	ENSMUSG00000036781	apparent_ortholog_one2one	12	12	9	11	9	YES	YES	9	11	9	34.7	34.7	59.665	530	51	53	37	1.3923e-221	26.8	31.9	27.2	606590000	161880000	229870000	214850000	20917000	5582000	7926400	7408600
129	ENSMMUP00000000798	ENSMMUP00000000798	ENSMMUT00000000859	ENSMMUG00000029310	ENSMMUP00000000798|ENSMMUT00000000859|ENSMMUG00000029310|HBA_MACMU|Hemoglobin subunit alpha (Hemoglobin alpha chain)(Alpha-globin) [Source:UniProtKB/Swiss-Prot;Acc:P63108]						ENSMUSP00000029082	ENSMUSG00000027566	apparent_ortholog_one2one	7	2	6	7	7	YES	YES	2	2	2	77.5	21.1	15.237	142	13	12	10	1.0598e-183	57.7	77.5	77.5	1304200000	666490000	341910000	295770000	163020000	83311000	42739000	36971000
130	ENSMMUP00000000799;ENSMMUP00000031944	ENSMMUP00000000799	ENSMMUT00000000860	ENSMMUG00000000594	ENSMMUP00000000799|ENSMMUT00000000860|ENSMMUG00000000594|XM_001094526.1;						ENSMUSP00000062429	ENSMUSG00000044562	apparent_ortholog_one2one	2	2	2	2	2	YES	YES	2	2	2	44.1	44.1	13.055	118	14	15	18	1.3155e-170	44.1	44.1	44.1	496570000	110290000	213530000	172740000	82761000	18382000	35589000	28790000
131	ENSMMUP00000000800	ENSMMUP00000000800	ENSMMUT00000000861	ENSMMUG00000000596	ENSMMUP00000000800|ENSMMUT00000000861|ENSMMUG00000000596|LUC7L|LUC7-like (S. cerevisiae) [Source:HGNC Symbol;Acc:6723]	ENSP00000293872	ENSG00000007392	LUC7L	LUC7-like (S. cerevisiae) [Source:HGNC Symbol;Acc:6723]	ortholog_one2one	ENSMUSP00000077342	ENSMUSG00000059182	apparent_ortholog_one2one	3	2	1	2	1	YES	YES	1	2	0	10.1	7.9	43.385	367	1	3		4.3205e-21	3	7.9	2.2	6787500	1743900	5043600	0	339370	87193	252180	0
132	ENSMMUP00000000806;ENSMMUP00000032823;ENSMMUP00000000805	ENSMMUP00000000806	ENSMMUT00000000867	ENSMMUG00000000599	ENSMMUP00000000806|ENSMMUT00000000867|ENSMMUG00000000599|ITFG3|integrin alpha FG-GAP repeat containing 3 [Source:HGNC Symbol;Acc:14163];						ENSMUSP00000027252	ENSMUSG00000026083	apparent_ortholog_one2one	2	2	2	2	2	YES	YES	2	2	2	5.5	5.5	69.628	639	4	3	4	2.6984e-31	5.5	5.5	5.5	25690000	11565000	6036000	8089700	828720	373050	194710	260960
133	ENSMMUP00000000820;ENSMMUP00000000821	ENSMMUP00000000820	ENSMMUT00000000882	ENSMMUG00000000609	ENSMMUP00000000820|ENSMMUT00000000882|ENSMMUG00000000609|MRPL28|mitochondrial ribosomal protein L28 [Source:HGNC Symbol;Acc:14484];	ENSP00000199706	ENSG00000086504	MRPL28	mitochondrial ribosomal protein L28 [Source:HGNC Symbol;Acc:14484]	ortholog_one2one	ENSMUSP00000030623	ENSMUSG00000028820	apparent_ortholog_one2one	4	4	4	2	2	YES	YES	4	2	2	19.1	19.1	30.185	256	6	3	4	3.53e-58	19.1	7.8	7.8	58209000	29777000	13975000	14457000	2910400	1488800	698760	722850
135	ENSMMUP00000000831	ENSMMUP00000000831	ENSMMUT00000000893	ENSMMUG00000000617	ENSMMUP00000000831|ENSMMUT00000000893|ENSMMUG00000000617|AP3B2|adaptor-related protein complex 3, beta 2 subunit [Source:HGNC Symbol;Acc:567]	ENSP00000261722	ENSG00000103723	AP3B2	adaptor-related protein complex 3, beta 2 subunit [Source:HGNC Symbol;Acc:567]	ortholog_one2one	ENSMUSP00000063734	ENSMUSG00000052397	apparent_ortholog_one2one	2	1	2	2	2	YES	YES	1	1	1	2.8	1.6	119.35	1082	1	1	1	4.2881e-07	2.8	2.8	2.8	6527300	1449000	3991500	1086900	98899	21954	60477	16468
136	ENSMMUP00000000832	ENSMMUP00000000832	ENSMMUT00000000894	ENSMMUG00000000619	ENSMMUP00000000832|ENSMMUT00000000894|ENSMMUG00000000619|XM_001087780.1						ENSMUSP00000022416	ENSMUSG00000021866	apparent_ortholog_one2one	2	1	1	1	2	YES	YES	0	0	1	13	7.1	20.537	184			1	8.7582e-11	6	6	13	143070	0	0	143070	11005	0	0	11005
137	ENSMMUP00000018225;ENSMMUP00000000841	ENSMMUP00000018225	ENSMMUT00000019464	ENSMMUG00000000628	ENSMMUP00000018225|ENSMMUT00000019464|ENSMMUG00000000628|UBE3A|ubiquitin protein ligase E3A [Source:HGNC Symbol;Acc:12496];	ENSP00000381045	ENSG00000114062	UBE3A	ubiquitin protein ligase E3A [Source:HGNC Symbol;Acc:12496]	ortholog_one2one	ENSMUSP00000106684	ENSMUSG00000029710	ortholog_one2one	4	4	3	4	2	YES	YES	3	4	2	7.1	7.1	100.12	872	6	4	3	4.0559e-65	5.3	7.1	3.7	47127000	21940000	18362000	6824700	981820	457090	382540	142180
138	ENSMMUP00000000842;ENSMMUP00000000843	ENSMMUP00000000842	ENSMMUT00000000904	ENSMMUG00000000629	ENSMMUP00000000842|ENSMMUT00000000904|ENSMMUG00000000629|NP_001098053.1|serpin peptidase inhibitor, clade C, member 1 [Source:RefSeq peptide;Acc:NP_001098053];	ENSP00000356671	ENSG00000117601	SERPINC1	serpin peptidase inhibitor, clade C (antithrombin), member 1 [Source:HGNC Symbol;Acc:775]	ortholog_one2one	ENSMUSP00000030760	ENSMUSG00000028923	apparent_ortholog_one2one	14	14	14	14	13	YES	YES	14	14	13	31.7	31.7	52.623	464	187	183	163	0	31.7	31.7	28.7	26927000000	8891900000	9354100000	8681500000	841480000	277870000	292320000	271300000
139	ENSMMUP00000000852;ENSMMUP00000007630;ENSMMUP00000038396	ENSMMUP00000000852	ENSMMUT00000000914	ENSMMUG00000005782	ENSMMUP00000000852|ENSMMUT00000000914|ENSMMUG00000005782|EPHX1;	ENSP00000355802	ENSG00000143819	EPHX1	epoxide hydrolase 1, microsomal (xenobiotic) [Source:HGNC Symbol;Acc:3401]	ortholog_one2one	ENSMUSP00000005705	ENSMUSG00000005566	apparent_ortholog_one2one	18	18	14	15	14	YES	YES	14	15	14	53.6	53.6	52.961	455	45	52	46	1.7572e-191	53	48.8	44.4	3830800000	1516000000	1406100000	908630000	132100000	52276000	48488000	31332000
140	ENSMMUP00000000865;ENSMMUP00000000863;ENSMMUP00000000862;ENSMMUP00000000864	ENSMMUP00000000865	ENSMMUT00000000927	ENSMMUG00000000643	ENSMMUP00000000865|ENSMMUT00000000927|ENSMMUG00000000643|MIER1|mesoderm induction early response 1 homolog (Xenopus laevis) [Source:HGNC Symbol;Acc:29657];	ENSP00000383820	ENSG00000198160	MIER1	mesoderm induction early response 1 homolog (Xenopus laevis) [Source:HGNC Symbol;Acc:29657]	ortholog_one2one	ENSMUSP00000067400	ENSMUSG00000032571	apparent_ortholog_one2one	4	4	2	1	4	YES	YES	2	1	4	14	14	60.148	534	4	2	5	7.1729e-28	6.2	3.7	14	85014000	37828000	16906000	30280000	3269800	1454900	650240	1164600
141	ENSMMUP00000000870	ENSMMUP00000000870	ENSMMUT00000000932	ENSMMUG00000000646	ENSMMUP00000000870|ENSMMUT00000000932|ENSMMUG00000000646	ENSP00000270792	ENSG00000142669	SH3BGRL3	SH3 domain binding glutamic acid-rich protein like 3 [Source:HGNC Symbol;Acc:15568]	ortholog_one2one	ENSMUSP00000021490	ENSMUSG00000021081	apparent_ortholog_one2one	3	3	3	3	2	YES	YES	3	3	2	9.1	9.1	23.051	219	20	19	14	2.8863e-75	9.1	9.1	8.7	3073300000	1268900000	1108500000	695920000	204880000	84591000	73899000	46395000
142	ENSMMUP00000000881	ENSMMUP00000000881	ENSMMUT00000000943	ENSMMUG00000000653	ENSMMUP00000000881|ENSMMUT00000000943|ENSMMUG00000000653|STMN1|stathmin 1 [Source:HGNC Symbol;Acc:6510]	ENSP00000410452	ENSG00000117632	STMN1	stathmin 1 [Source:HGNC Symbol;Acc:6510]	ortholog_one2one	ENSMUSP00000105147	ENSMUSG00000031783	apparent_ortholog_one2one	3	3	2	3	2	YES	YES	2	3	2	18.2	18.2	17.239	148	8	12	10	4.5169e-13	18.2	18.2	18.2	208200000	44535000	88663000	75000000	20820000	4453500	8866300	7500000
143	ENSMMUP00000000885	ENSMMUP00000000885	ENSMMUT00000000947	ENSMMUG00000000652	ENSMMUP00000000885|ENSMMUT00000000947|ENSMMUG00000000652|SERBP1|SERPINE1 mRNA binding protein 1 [Source:HGNC Symbol;Acc:17860]	ENSP00000360034	ENSG00000142864	SERBP1	SERPINE1 mRNA binding protein 1 [Source:HGNC Symbol;Acc:17860]	ortholog_one2one	ENSMUSP00000068931	ENSMUSG00000055817	apparent_ortholog_one2one	3	3	3	3	2	YES	YES	3	3	2	13	13	44.965	408	17	14	14	7.5487e-213	13	13	8.6	1076100000	282420000	468010000	325710000	51245000	13449000	22286000	15510000
144	ENSMMUP00000000892;ENSMMUP00000039774	ENSMMUP00000000892	ENSMMUT00000000954	ENSMMUG00000000662	ENSMMUP00000000892|ENSMMUT00000000954|ENSMMUG00000000662|GBP1|guanylate binding protein 1, interferon-inducible, 67kDa [Source:HGNC Symbol;Acc:4182]	ENSP00000359504	ENSG00000117228	GBP1	guanylate binding protein 1, interferon-inducible [Source:HGNC Symbol;Acc:4182]	ortholog_one2one	ENSMUSP00000009774	ENSMUSG00000009630	apparent_ortholog_one2one	6	1	4	4	6	YES	YES	0	0	1	14.6	3.2	67.709	590	9	9	11	1.4691e-89	9.5	9.5	14.6	362110000	110270000	105600000	146230000	10650000	3243400	3105900	4301000
145	ENSMMUP00000000894	ENSMMUP00000000894	ENSMMUT00000000956	ENSMMUG00000000664	ENSMMUP00000000894|ENSMMUT00000000956|ENSMMUG00000000664|RRAS2|related RAS viral (r-ras) oncogene homolog 2 [Source:HGNC Symbol;Acc:17271]	ENSP00000256196	ENSG00000133818	RRAS2	related RAS viral (r-ras) oncogene homolog 2 [Source:HGNC Symbol;Acc:17271]	ortholog_one2one	ENSMUSP00000081009	ENSMUSG00000049091	apparent_ortholog_one2one	4	3	4	3	4	YES	YES	3	2	3	21.1	13.2	23.399	204	7	4	6	9.2413e-42	21.1	21.1	21.1	106140000	39693000	31807000	34641000	7076100	2646200	2120500	2309400
146	ENSMMUP00000000899;ENSMMUP00000040989;ENSMMUP00000040990	ENSMMUP00000000899	ENSMMUT00000000961	ENSMMUG00000000667	ENSMMUP00000000899|ENSMMUT00000000961|ENSMMUG00000000667|ZMYM3;	ENSP00000343909	ENSG00000147130	ZMYM3	zinc finger, MYM-type 3 [Source:HGNC Symbol;Acc:13054]	ortholog_one2one	ENSMUSP00000004137	ENSMUSG00000004035	apparent_ortholog_one2one	5	5	2	2	4	YES	YES	2	2	4	7.7	7.7	152.47	1371	3	2	4	2.1149e-18	3.9	2.8	5.5	25965000	10878000	5151400	9935700	360630	151090	71547	138000
147	ENSMMUP00000000902;ENSMMUP00000000904;ENSMMUP00000000903;ENSMMUP00000000906	ENSMMUP00000000902	ENSMMUT00000000964	ENSMMUG00000000671	ENSMMUP00000000902|ENSMMUT00000000964|ENSMMUG00000000671|IDS|iduronate 2-sulfatase [Source:HGNC Symbol;Acc:5389];	ENSP00000339801	ENSG00000010404	IDS	iduronate 2-sulfatase [Source:HGNC Symbol;Acc:5389]	ortholog_one2one	ENSMUSP00000027973	ENSMUSG00000026662	apparent_ortholog_one2one	2	2	2	2	2	YES	YES	2	2	2	5.1	5.1	61.827	551	2	2	4	2.4297e-30	5.1	5.1	5.1	22343000	6825600	6763700	8753200	930940	284400	281820	364720
148	ENSMMUP00000000905	ENSMMUP00000000905	ENSMMUT00000000967	ENSMMUG00000000672	ENSMMUP00000000905|ENSMMUT00000000967|ENSMMUG00000000672|Q28508_MACMU|Haptoglobin Fragment [Source:UniProtKB/TrEMBL;Acc:Q28508]						ENSMUSP00000078867	ENSMUSG00000009079	apparent_ortholog_one2one	3	1	3	3	2	YES	YES	1	1	1	14.9	5	44.542	402	5	5	5	1.1865e-81	14.9	14.9	8	611670000	157290000	262250000	192130000	22654000	5825400	9713100	7115900
149	ENSMMUP00000000907	ENSMMUP00000000907	ENSMMUT00000000969	ENSMMUG00000000672	ENSMMUP00000000907|ENSMMUT00000000969|ENSMMUG00000000672|Q28508_MACMU|Haptoglobin Fragment [Source:UniProtKB/TrEMBL;Acc:Q28508]						ENSMUSP00000013693	ENSMUSG00000029213	apparent_ortholog_one2one	4	2	4	4	3	YES	YES	2	2	2	17.3	9.8	38.382	347	18	17	15	7.9894e-111	17.3	17.3	13.3	1328300000	547430000	572450000	208430000	63252000	26068000	27259000	9925200
150	ENSMMUP00000000912	ENSMMUP00000000912	ENSMMUT00000000974	ENSMMUG00000000677	ENSMMUP00000000912|ENSMMUT00000000974|ENSMMUG00000000677|DHX38|DEAH (Asp-Glu-Ala-His) box polypeptide 38 [Source:HGNC Symbol;Acc:17211]	ENSP00000268482	ENSG00000140829	DHX38	DEAH (Asp-Glu-Ala-His) box polypeptide 38 [Source:HGNC Symbol;Acc:17211]	ortholog_one2one	ENSMUSP00000026173	ENSMUSG00000025173	apparent_ortholog_one2one	6	6	5	3	4	YES	YES	5	3	4	7.6	7.6	140.49	1227	6	4	4	3.8351e-87	5.2	2.9	5.5	39675000	14633000	13492000	11549000	575000	212080	195540	167380
151	ENSMMUP00000000917;ENSMMUP00000032602	ENSMMUP00000000917	ENSMMUT00000000979	ENSMMUG00000000681	ENSMMUP00000000917|ENSMMUT00000000979|ENSMMUG00000000681|LOC722574;	ENSP00000298912	ENSG00000165959	CLMN	calmin (calponin-like, transmembrane) [Source:HGNC Symbol;Acc:19972]	ortholog_one2one	ENSMUSP00000093077	ENSMUSG00000024012	apparent_ortholog_one2one	2	2	1	1	1	YES	YES	1	1	1	4.1	4.1	103.07	934	1	1	1	1.8464e-13	2.6	2.6	1.5	18230000	9268500	7482200	1479000	387860	197200	159190	31469
152	ENSMMUP00000000918;ENSMMUP00000041326	ENSMMUP00000000918	ENSMMUT00000000980	ENSMMUG00000000682	ENSMMUP00000000918|ENSMMUT00000000980|ENSMMUG00000000682|NAPG|N-ethylmaleimide-sensitive factor attachment protein, gamma [Source:HGNC Symbol;Acc:7642];	ENSP00000324628	ENSG00000134265	NAPG	N-ethylmaleimide-sensitive factor attachment protein, gamma [Source:HGNC Symbol;Acc:7642]	ortholog_one2one	ENSMUSP00000093077	ENSMUSG00000024012	apparent_ortholog_one2one	3	3	2	3	2	YES	YES	2	3	2	12.1	12.1	35.157	314	2	4	4	1.3601e-29	9.6	12.1	9.6	44206000	9138000	19512000	15556000	2210300	456900	975610	777810
153	ENSMMUP00000000920	ENSMMUP00000000920	ENSMMUT00000000982	ENSMMUG00000000684	ENSMMUP00000000920|ENSMMUT00000000982|ENSMMUG00000000684|ACADSB|acyl-CoA dehydrogenase, short/branched chain [Source:HGNC Symbol;Acc:91]	ENSP00000357873	ENSG00000196177	ACADSB	acyl-CoA dehydrogenase, short/branched chain [Source:HGNC Symbol;Acc:91]	ortholog_one2one	ENSMUSP00000096705	ENSMUSG00000074604	apparent_ortholog_one2one	9	4	8	8	8	YES	YES	4	4	4	41.1	15.1	45.942	418	43	47	47	6.0042e-253	33.7	33.7	36.8	1046700000	239800000	589360000	217500000	40256000	9223200	22668000	8365600
154	ENSMMUP00000000931;ENSMMUP00000039639;ENSMMUP00000000932;ENSMMUP00000039638	ENSMMUP00000000931	ENSMMUT00000000993	ENSMMUG00000000690	ENSMMUP00000000931|ENSMMUT00000000993|ENSMMUG00000000690|CTNNAL1|catenin (cadherin-associated protein), alpha-like 1 [Source:HGNC Symbol;Acc:2512];	ENSP00000320434	ENSG00000119326	CTNNAL1	catenin (cadherin-associated protein), alpha-like 1 [Source:HGNC Symbol;Acc:2512]	ortholog_one2one	ENSMUSP00000018569	ENSMUSG00000018425	apparent_ortholog_one2one	4	4	3	3	2	YES	YES	3	3	2	10.1	10.1	81.861	734	8	10	8	2.2224e-31	7.1	8.2	5.2	72607000	24882000	30584000	17141000	1613500	552930	679650	380910
155	ENSMMUP00000000937	ENSMMUP00000000937	ENSMMUT00000000999	ENSMMUG00000000696	ENSMMUP00000000937|ENSMMUT00000000999|ENSMMUG00000000696|ABHD10|abhydrolase domain containing 10 [Source:HGNC Symbol;Acc:25656]	ENSP00000273359	ENSG00000144827	ABHD10	abhydrolase domain containing 10 [Source:HGNC Symbol;Acc:25656]	ortholog_one2one	ENSMUSP00000022322	ENSMUSG00000021794	apparent_ortholog_one2one	5	5	2	4	4	YES	YES	2	4	4	29.4	29.4	33.759	306	6	6	9	6.7247e-38	11.8	23.9	23.5	211590000	49423000	77513000	84650000	10076000	2353500	3691100	4030900
156	ENSMMUP00000000940	ENSMMUP00000000940	ENSMMUT00000001002	ENSMMUG00000000699	ENSMMUP00000000940|ENSMMUT00000001002|ENSMMUG00000000699|CPSF2|cleavage and polyadenylation specific factor 2, 100kDa [Source:HGNC Symbol;Acc:2325]	ENSP00000298875	ENSG00000165934	CPSF2	cleavage and polyadenylation specific factor 2, 100kDa [Source:HGNC Symbol;Acc:2325]	ortholog_one2one	ENSMUSP00000006915	ENSMUSG00000006732	apparent_ortholog_one2one	11	11	8	6	9	YES	YES	8	6	9	23.3	23.3	88.472	782	24	20	26	7.7341e-119	18.8	16.6	21.1	324030000	102440000	111040000	110550000	7044100	2226900	2414000	2403300
157	ENSMMUP00000000943	ENSMMUP00000000943	ENSMMUT00000001006	ENSMMUG00000000704	ENSMMUP00000000943|ENSMMUT00000001006|ENSMMUG00000000704|NUP155|nucleoporin 155kDa [Source:HGNC Symbol;Acc:8063]	ENSP00000231498	ENSG00000113569	NUP155	nucleoporin 155kDa [Source:HGNC Symbol;Acc:8063]	ortholog_one2one	ENSMUSP00000000769	ENSMUSG00000000753	apparent_ortholog_one2one	6	6	5	3	3	YES	YES	5	3	3	12.8	12.8	83.483	760	5	6	5	6.5298e-24	10.4	6.2	6.2	78962000	31461000	24623000	22879000	2467600	983150	769450	714970
158	ENSMMUP00000000955	ENSMMUP00000000955	ENSMMUT00000001018	ENSMMUG00000000707	ENSMMUP00000000955|ENSMMUT00000001018|ENSMMUG00000000707|XM_001103862.1	ENSP00000457539	ENSG00000184730	APOBR	apolipoprotein B receptor [Source:HGNC Symbol;Acc:24087]	ortholog_one2one	ENSMUSP00000048416	ENSMUSG00000035297	apparent_ortholog_one2one	6	6	3	5	5	YES	YES	3	5	5	13.4	13.4	112.18	1053	7	7	9	4.2054e-70	5.8	11.4	11.4	194470000	54676000	68991000	70801000	3472600	976350	1232000	1264300
159	ENSMMUP00000000958;ENSMMUP00000000960;ENSMMUP00000000961;ENSMMUP00000000962	ENSMMUP00000000958	ENSMMUT00000001021	ENSMMUG00000000706	ENSMMUP00000000958|ENSMMUT00000001021|ENSMMUG00000000706|FLNB|filamin B, beta [Source:HGNC Symbol;Acc:3755];	ENSP00000420213	ENSG00000136068	FLNB	filamin B, beta [Source:HGNC Symbol;Acc:3755]	ortholog_one2one	ENSMUSP00000104456	ENSMUSG00000052414	apparent_ortholog_one2one	61	56	53	51	50	YES	YES	48	47	46	42.2	40	277.97	2603	182	189	183	0	35	36.2	34.8	9321900000	3368400000	3285800000	2667800000	59756000	21592000	21063000	17101000
161	ENSMMUP00000000980;ENSMMUP00000034033;ENSMMUP00000034035;ENSMMUP00000025837	ENSMMUP00000000980	ENSMMUT00000001046	ENSMMUG00000000729	ENSMMUP00000000980|ENSMMUT00000001046|ENSMMUG00000000729|C2|Complement C2 Precursor (EC 3.4.21.43)(C3/C5 convertase) [Contains Complement C2b fragment;Complement C2a fragment] [Source:UniProtKB/Swiss-Prot;Acc:P06681];	ENSP00000299367	ENSG00000166278	C2	complement component 2 [Source:HGNC Symbol;Acc:1248]	ortholog_one2one	ENSMUSP00000104265	ENSMUSG00000006333	apparent_ortholog_one2one	12	12	12	11	12	YES	YES	12	11	12	19.8	19.8	83.243	752	36	41	36	1.5183e-280	19.8	18.4	19.8	1280200000	437890000	446380000	395940000	29096000	9952000	10145000	8998700
162	ENSMMUP00000000984;ENSMMUP00000012226	ENSMMUP00000000984	ENSMMUT00000001050	ENSMMUG00000000730	ENSMMUP00000000984|ENSMMUT00000001050|ENSMMUG00000000730|SPTA1|spectrin, alpha, erythrocytic 1 (elliptocytosis 2) [Source:HGNC Symbol;Acc:11272];	ENSP00000357130	ENSG00000163554	SPTA1	spectrin, alpha, erythrocytic 1 (elliptocytosis 2) [Source:HGNC Symbol;Acc:11272]	ortholog_one2one	ENSMUSP00000121309	ENSMUSG00000024949	apparent_ortholog_one2one	4	4	4	2	1	YES	YES	4	2	1	3	3	280.84	2431	4	3	1	1.7366e-17	3	2.1	1.1	16085000	6453000	7192000	2440200	98081	39348	43854	14879
163	ENSMMUP00000000985;ENSMMUP00000000987	ENSMMUP00000000985	ENSMMUT00000001051	ENSMMUG00000000731	ENSMMUP00000000985|ENSMMUT00000001051|ENSMMUG00000000731						ENSMUSP00000130313	ENSMUSG00000068882	apparent_ortholog_one2one	10	10	8	8	8	YES	YES	8	8	8	19.1	19.1	85.536	763	36	37	30	2.7432e-205	13.6	13.6	14.9	1853500000	611390000	715880000	526270000	47527000	15677000	18356000	13494000
164	ENSMMUP00000000988;ENSMMUP00000034024;ENSMMUP00000000989;ENSMMUP00000034023	ENSMMUP00000000988	ENSMMUT00000001055	ENSMMUG00000000735	ENSMMUP00000000988|ENSMMUT00000001055|ENSMMUG00000000735|RDBP|Negative elongation factor E (NELF-E)(RNA-binding protein RD) [Source:UniProtKB/Swiss-Prot;Acc:P18615];	ENSP00000364578	ENSG00000204356	NELFE	negative elongation factor complex member E [Source:HGNC Symbol;Acc:13974]	ortholog_one2one	ENSMUSP00000064755	ENSMUSG00000053398	apparent_ortholog_one2one	2	2	2	2	2	YES	YES	2	2	2	9.5	9.5	43.207	380	8	7	4	7.0641e-22	9.5	9.5	9.5	56348000	26038000	18835000	11474000	2817400	1301900	941740	573710
165	ENSMMUP00000000990	ENSMMUP00000000990	ENSMMUT00000001057	ENSMMUG00000000737	ENSMMUP00000000990|ENSMMUT00000001057|ENSMMUG00000000737|HAGH|hydroxyacylglutathione hydrolase [Source:HGNC Symbol;Acc:4805]	ENSP00000380514	ENSG00000063854	HAGH	hydroxyacylglutathione hydrolase [Source:HGNC Symbol;Acc:4805]	ortholog_one2one	ENSMUSP00000044178	ENSMUSG00000034192	apparent_ortholog_one2one	5	5	4	4	4	YES	YES	4	4	4	22.4	22.4	33.905	308	8	9	9	8.5697e-42	15.6	15.6	19.8	252120000	83214000	87168000	81739000	12006000	3962600	4150900	3892300
166	ENSMMUP00000000991	ENSMMUP00000000991	ENSMMUT00000001058	ENSMMUG00000000738	ENSMMUP00000000991|ENSMMUT00000001058|ENSMMUG00000000738|FAHD1|fumarylacetoacetate hydrolase domain containing 1 [Source:HGNC Symbol;Acc:14169]	ENSP00000372112	ENSG00000180185	FAHD1	fumarylacetoacetate hydrolase domain containing 1 [Source:HGNC Symbol;Acc:14169]	ortholog_one2one	ENSMUSP00000078940	ENSMUSG00000062203	apparent_ortholog_one2one	5	5	4	3	5	YES	YES	4	3	5	42.5	42.5	24.894	226	10	8	10	7.3032e-97	33.2	27	42.5	220580000	87388000	77697000	55499000	12255000	4854900	4316500	3083300
167	ENSMMUP00000000996	ENSMMUP00000000996	ENSMMUT00000001063	ENSMMUG00000000736	ENSMMUP00000000996|ENSMMUT00000001063|ENSMMUG00000000736|SKIV2L|helicase SKI2W [Source:RefSeq peptide;Acc:NP_008860]	ENSP00000364543	ENSG00000204351	SKIV2L	superkiller viralicidic activity 2-like (S. cerevisiae) [Source:HGNC Symbol;Acc:10898]	ortholog_one2one	ENSMUSP00000099509	ENSMUSG00000003660	apparent_ortholog_one2one	10	10	8	6	7	YES	YES	8	6	7	13.8	13.8	137.34	1243	24	18	22	5.0562e-105	11.2	9.2	10.6	253190000	76376000	86411000	90405000	4083700	1231900	1393700	1458100
168	ENSMMUP00000000999	ENSMMUP00000000999	ENSMMUT00000001067	ENSMMUG00000000741	ENSMMUP00000000999|ENSMMUT00000001067|ENSMMUG00000000741|DOM3Z|Protein Dom3Z (Dom-3 homolog Z) [Source:UniProtKB/Swiss-Prot;Acc:O77932]	ENSP00000364498	ENSG00000204348	DOM3Z	dom-3 homolog Z (C. elegans) [Source:HGNC Symbol;Acc:2992]	ortholog_one2one	ENSMUSP00000068890	ENSMUSG00000027805	apparent_ortholog_one2one	3	3	1	2	2	YES	YES	1	2	2	12.6	12.6	45.035	396	1	3	2	1.8723e-07	3	9.6	7.1	14381000	41429	13843000	497220	625270	1801.2	601850	21618
169	ENSMMUP00000001008	ENSMMUP00000001008	ENSMMUT00000001076	ENSMMUG00000014452	ENSMMUP00000001008|ENSMMUT00000001076|ENSMMUG00000014452|SDHA|succinate dehydrogenase complex, subunit A, flavoprotein (Fp) [Source:HGNC Symbol;Acc:10680]	ENSP00000264932	ENSG00000073578	SDHA	succinate dehydrogenase complex, subunit A, flavoprotein (Fp) [Source:HGNC Symbol;Acc:10680]	ortholog_one2one	ENSMUSP00000066516	ENSMUSG00000028790	apparent_ortholog_one2one	6	6	5	4	5	YES	YES	5	4	5	21.3	21.3	54.557	493	24	21	23	6.2119e-111	17.6	12	15.6	547920000	163130000	182440000	202350000	20293000	6042000	6756900	7494400
170	ENSMMUP00000001011	ENSMMUP00000001011	ENSMMUT00000001079	ENSMMUG00000011933	ENSMMUP00000001011|ENSMMUT00000001079|ENSMMUG00000011933|PDCD6|programmed cell death 6 [Source:HGNC Symbol;Acc:8765]	ENSP00000264933	ENSG00000249915	PDCD6	programmed cell death 6 [Source:HGNC Symbol;Acc:8765]	ortholog_one2one	ENSMUSP00000031288	ENSMUSG00000029345	apparent_ortholog_one2one	6	6	4	6	5	YES	YES	4	6	5	47.9	47.9	21.575	190	21	30	27	2.8333e-176	30.5	47.9	44.7	1881800000	640280000	669290000	572220000	171070000	58207000	60845000	52020000
171	ENSMMUP00000001013	ENSMMUP00000001013	ENSMMUT00000001081	ENSMMUG00000000751	ENSMMUP00000001013|ENSMMUT00000001081|ENSMMUG00000000751|NLE1|notchless homolog 1 (Drosophila) [Source:HGNC Symbol;Acc:19889]	ENSP00000413572	ENSG00000073536	NLE1	notchless homolog 1 (Drosophila) [Source:HGNC Symbol;Acc:19889]	ortholog_one2one	ENSMUSP00000078886	ENSMUSG00000063802	apparent_ortholog_one2one	4	4	3	3	3	YES	YES	3	3	3	13.4	13.4	53.222	485	3	3	3	2.7481e-13	10.5	10.7	8.5	26342000	13512000	6491800	6338700	940800	482570	231850	226380
172	ENSMMUP00000001016;ENSMMUP00000001018	ENSMMUP00000001016	ENSMMUT00000001084	ENSMMUG00000000754	ENSMMUP00000001016|ENSMMUT00000001084|ENSMMUG00000000754|XR_009965.1;						ENSMUSP00000066038	ENSMUSG00000053565	apparent_ortholog_one2one	6	6	4	1	4	YES	YES	4	1	4	3.4	3.4	250	2227	4	1	6	1.1657e-15	2.3	0.4	2.2	13255000	9611400	1174500	2468800	113290	82149	10038	21101
173	ENSMMUP00000001017;ENSMMUP00000034007	ENSMMUP00000001017	ENSMMUT00000001085	ENSMMUG00000000749	ENSMMUP00000001017|ENSMMUT00000001085|ENSMMUG00000000749|Q6XML5_MACMU|C4 Fragment [Source:UniProtKB/TrEMBL;Acc:Q6XML5]						ENSMUSP00000043583	ENSMUSG00000037608	apparent_ortholog_one2one	32	32	30	31	24	YES	YES	30	31	24	36.7	36.7	117.23	1064	190	163	161	0	35.1	36.7	30.4	6764400000	2607400000	2244900000	1912000000	112740000	43457000	37415000	31867000
174	ENSMMUP00000001024	ENSMMUP00000001024	ENSMMUT00000001092	ENSMMUG00000000758	ENSMMUP00000001024|ENSMMUT00000001092|ENSMMUG00000000758	ENSP00000407685	ENSG00000168477	TNXB	tenascin XB [Source:HGNC Symbol;Acc:11976]	ortholog_one2one	ENSMUSP00000063714	ENSMUSG00000025132	apparent_ortholog_one2one	15	15	13	14	11	YES	YES	13	14	11	34.3	34.3	88.827	813	39	35	29	7.5075e-215	29.8	31.6	23.7	565490000	214370000	217000000	134120000	14137000	5359200	5425000	3353000
177	ENSMMUP00000001049	ENSMMUP00000001049	ENSMMUT00000001120	ENSMMUG00000000779	ENSMMUP00000001049|ENSMMUT00000001120|ENSMMUG00000000779|NUDCD3|NudC domain containing 3 [Source:HGNC Symbol;Acc:22208]	ENSP00000347626	ENSG00000015676	NUDCD3	NudC domain containing 3 [Source:HGNC Symbol;Acc:22208]	ortholog_one2one	ENSMUSP00000077972	ENSMUSG00000044221	apparent_ortholog_one2one	7	7	7	7	7	YES	YES	7	7	7	29.7	29.7	41.091	364	26	20	19	4.0224e-137	29.7	29.7	29.7	300820000	111280000	107620000	81919000	11570000	4280100	4139300	3150700
178	ENSMMUP00000001068;ENSMMUP00000001070;ENSMMUP00000001076	ENSMMUP00000001068	ENSMMUT00000001139	ENSMMUG00000000787	ENSMMUP00000001068|ENSMMUT00000001139|ENSMMUG00000000787|DIS3|DIS3 mitotic control homolog (S. cerevisiae) [Source:HGNC Symbol;Acc:20604];	ENSP00000366997	ENSG00000083520	DIS3	DIS3 mitotic control homolog (S. cerevisiae) [Source:HGNC Symbol;Acc:20604]	ortholog_one2one	ENSMUSP00000095285	ENSMUSG00000073639	apparent_ortholog_one2one	3	3	2	1	2	YES	YES	2	1	2	4.3	4.3	109.39	961	5	2	2	3.702e-09	2.8	1.5	3.1	27406000	16264000	4915400	6226100	489390	290440	87775	111180
179	ENSMMUP00000001071;ENSMMUP00000001047;ENSMMUP00000001067;ENSMMUP00000012516;ENSMMUP00000033509	ENSMMUP00000001071	ENSMMUT00000001142	ENSMMUG00000000777	ENSMMUP00000001071|ENSMMUT00000001142|ENSMMUG00000000777|Q3YAH9_MACMU|Dystonin Fragment [Source:UniProtKB/TrEMBL;Acc:Q3YAG8];	ENSP00000244364	ENSG00000151914	DST	dystonin [Source:HGNC Symbol;Acc:1090]	ortholog_one2one	ENSMUSP00000020077	ENSMUSG00000019920	apparent_ortholog_one2one	18	2	11	13	11	YES	YES	1	1	1	3.7	0.4	857.52	7544	16	18	16	5.2535e-137	2.2	2.8	2.4	151490000	28982000	69198000	53312000	317590	60758	145070	111770
180	ENSMMUP00000001077	ENSMMUP00000001077	ENSMMUT00000001148	ENSMMUG00000000792	ENSMMUP00000001077|ENSMMUT00000001148|ENSMMUG00000000792|FAM134A|family with sequence similarity 134, member A [Source:HGNC Symbol;Acc:28450]	ENSP00000395249	ENSG00000144567	FAM134A	family with sequence similarity 134, member A [Source:HGNC Symbol;Acc:28450]	ortholog_one2one	ENSMUSP00000020077	ENSMUSG00000019920	apparent_ortholog_one2one	3	3	1	3	1	YES	YES	1	3	1	9.4	9.4	57.866	543	2	4	1	9.1764e-08	2.4	9.4	2.4	7706100	1547100	5230400	928630	428110	85948	290580	51590
181	ENSMMUP00000001080;ENSMMUP00000005513;ENSMMUP00000005519;ENSMMUP00000005517	ENSMMUP00000001080	ENSMMUT00000001151	ENSMMUG00000004122	ENSMMUP00000001080|ENSMMUT00000001151|ENSMMUG00000004122|TAU_MACMU|Microtubule-associated protein tau (Neurofibrillary tangle protein)(Paired helical filament-tau)(PHF-tau) [Source:UniProtKB/Swiss-Prot;Acc:P57786];	ENSP00000340820	ENSG00000186868	MAPT	microtubule-associated protein tau [Source:HGNC Symbol;Acc:6893]	ortholog_one2one	ENSMUSP00000020077	ENSMUSG00000019920	apparent_ortholog_one2one	2	2	1	1	1	YES	YES	1	1	1	5	5	81.048	774	1	1	1	1.2943e-07	2.1	3	3	20164000	18541000	1025500	598220	491810	452210	25013	14591
182	ENSMMUP00000001085;ENSMMUP00000036718	ENSMMUP00000001085	ENSMMUT00000001156	ENSMMUG00000000796	ENSMMUP00000001085|ENSMMUT00000001156|ENSMMUG00000000796|KDELC2|KDEL (Lys-Asp-Glu-Leu) containing 2 [Source:HGNC Symbol;Acc:28496];	ENSP00000315386	ENSG00000178202	KDELC2	KDEL (Lys-Asp-Glu-Leu) containing 2 [Source:HGNC Symbol;Acc:28496]	ortholog_one2one	ENSMUSP00000095782	ENSMUSG00000072244	apparent_ortholog_one2one	11	11	11	10	10	YES	YES	11	10	10	30	30	58.555	507	43	36	43	2.9555e-201	30	28.2	28.2	1003600000	297460000	356490000	349690000	32376000	9595600	11500000	11280000
183	ENSMMUP00000001088	ENSMMUP00000001088	ENSMMUT00000001159	ENSMMUG00000000798	ENSMMUP00000001088|ENSMMUT00000001159|ENSMMUG00000000798|BAG3|BCL2-associated athanogene 3 [Source:HGNC Symbol;Acc:939]	ENSP00000358081	ENSG00000151929	BAG3	BCL2-associated athanogene 3 [Source:HGNC Symbol;Acc:939]	ortholog_one2one	ENSMUSP00000095782	ENSMUSG00000072244	apparent_ortholog_one2one	4	4	1	4	3	YES	YES	1	4	3	11.3	11.3	61.563	575	2	6	6	1.8967e-20	4.5	11.3	8.5	95234000	21989000	18896000	54350000	2506200	578650	497260	1430300
184	ENSMMUP00000001091;ENSMMUP00000001090	ENSMMUP00000001091	ENSMMUT00000001162	ENSMMUG00000000800	ENSMMUP00000001091|ENSMMUT00000001162|ENSMMUG00000000800|PSMD2|proteasome (prosome, macropain) 26S subunit, non-ATPase, 2 [Source:HGNC Symbol;Acc:9559];	ENSP00000310129	ENSG00000175166	PSMD2	proteasome (prosome, macropain) 26S subunit, non-ATPase, 2 [Source:HGNC Symbol;Acc:9559]	ortholog_one2one	ENSMUSP00000059562	ENSMUSG00000057335	apparent_ortholog_one2one	15	15	14	12	11	YES	YES	14	12	11	26.8	26.8	100.01	909	60	60	47	0	25.9	22.7	20.7	1800400000	687650000	604730000	508020000	33970000	12975000	11410000	9585300
186	ENSMMUP00000001096	ENSMMUP00000001096	ENSMMUT00000001167	ENSMMUG00000000803	ENSMMUP00000001096|ENSMMUT00000001167|ENSMMUG00000000803|STAT2|signal transducer and activator of transcription 2, 113kDa [Source:HGNC Symbol;Acc:11363]	ENSP00000315768	ENSG00000170581	STAT2	signal transducer and activator of transcription 2, 113kDa [Source:HGNC Symbol;Acc:11363]	ortholog_one2one	ENSMUSP00000128400	ENSMUSG00000090553	apparent_ortholog_one2one	4	4	3	4	4	YES	YES	3	4	4	5.8	5.8	97.751	851	7	5	7	1.4995e-28	2.9	5.8	5.8	65423000	14634000	26520000	24269000	1335200	298650	541220	495290
187	ENSMMUP00000001102;ENSMMUP00000013787	ENSMMUP00000001102	ENSMMUT00000001174	ENSMMUG00000000810	ENSMMUP00000001102|ENSMMUT00000001174|ENSMMUG00000000810|LOC697761;						ENSMUSP00000036277	ENSMUSG00000037461	apparent_ortholog_one2one	5	1	3	5	4	YES	YES	0	1	1	57.8	23.3	12.97	116		1	1	1.3121e-269	26.7	57.8	50	9865500	0	6846100	3019500	1233200	0	855760	377440
188	ENSMMUP00000001114;ENSMMUP00000001115;ENSMMUP00000039257	ENSMMUP00000001114	ENSMMUT00000001187	ENSMMUG00000000822	ENSMMUP00000001114|ENSMMUT00000001187|ENSMMUG00000000822|USP4|ubiquitin specific peptidase 4 (proto-oncogene) [Source:HGNC Symbol;Acc:12627];	ENSP00000265560	ENSG00000114316	USP4	ubiquitin specific peptidase 4 (proto-oncogene) [Source:HGNC Symbol;Acc:12627]	ortholog_one2one	ENSMUSP00000064840	ENSMUSG00000056167	apparent_ortholog_one2one	6	5	6	4	4	YES	YES	5	3	3	7.7	7.7	107.84	957	15	12	11	1.562e-81	7.7	4.6	4.6	143060000	58399000	50161000	34498000	2601000	1061800	912010	627240
189	ENSMMUP00000001116	ENSMMUP00000001116	ENSMMUT00000001189	ENSMMUG00000000823	ENSMMUP00000001116|ENSMMUT00000001189|ENSMMUG00000000823|LMNB1|lamin B1 [Source:HGNC Symbol;Acc:6637]	ENSP00000261366	ENSG00000113368	LMNB1	lamin B1 [Source:HGNC Symbol;Acc:6637]	ortholog_one2one	ENSMUSP00000083250	ENSMUSG00000029478	apparent_ortholog_one2one	18	18	16	15	14	YES	YES	16	15	14	41.8	41.8	66.453	586	72	88	62	0	32.1	33.8	36.3	8173100000	2425700000	3274000000	2473300000	215080000	63835000	86159000	65088000
190	ENSMMUP00000001118;ENSMMUP00000031852	ENSMMUP00000001118	ENSMMUT00000001191	ENSMMUG00000000825	ENSMMUP00000001118|ENSMMUT00000001191|ENSMMUG00000000825|DGAT1|diacylglycerol O-acyltransferase 1 [Source:HGNC Symbol;Acc:2843];	ENSP00000332258	ENSG00000185000	DGAT1	diacylglycerol O-acyltransferase 1 [Source:HGNC Symbol;Acc:2843]	ortholog_one2one	ENSMUSP00000121020	ENSMUSG00000029462	apparent_ortholog_one2one	2	2	2	2	2	YES	YES	2	2	2	7.1	7.1	55.635	491	3	2	2	2.5163e-44	7.1	7.1	7.1	11277000	7199100	2376700	1701200	626490	399950	132040	94510
192	ENSMMUP00000001121;ENSMMUP00000001122;ENSMMUP00000034752	ENSMMUP00000001121	ENSMMUT00000001194	ENSMMUG00000000828	ENSMMUP00000001121|ENSMMUT00000001194|ENSMMUG00000000828|GAB1;	ENSP00000262995	ENSG00000109458	GAB1	GRB2-associated binding protein 1 [Source:HGNC Symbol;Acc:4066]	ortholog_one2one	ENSMUSP00000029698	ENSMUSG00000028062	apparent_ortholog_one2one	4	4	1	1	2	YES	YES	1	1	2	9.7	9.7	80.135	724	1	1	2	1.7351e-08	2.1	1.7	5.9	20801000	3098800	4081700	13621000	594320	88538	116620	389170
193	ENSMMUP00000001123	ENSMMUP00000001123	ENSMMUT00000001196	ENSMMUG00000000830	ENSMMUP00000001123|ENSMMUT00000001196|ENSMMUG00000000830|DAD1|defender against cell death 1 [Source:HGNC Symbol;Acc:2664]	ENSP00000250498	ENSG00000129562	DAD1	defender against cell death 1 [Source:HGNC Symbol;Acc:2664]	ortholog_one2one	ENSMUSP00000135427	ENSMUSG00000050936	apparent_ortholog_one2one	2	2	1	1	2	YES	YES	1	1	2	20.4	20.4	12.497	113	1	2	4	1.3499e-10	10.6	10.6	20.4	74739000	30772000	29090000	14877000	14948000	6154300	5818100	2975400
194	ENSMMUP00000001125	ENSMMUP00000001125	ENSMMUT00000001198	ENSMMUG00000000829	ENSMMUP00000001125|ENSMMUT00000001198|ENSMMUG00000000829|SMARCA5|SWI/SNF related, matrix associated, actin dependent regulator of chromatin, subfamily a, member 5 [Source:HGNC Symbol;Acc:11101]	ENSP00000283131	ENSG00000153147	SMARCA5	SWI/SNF related, matrix associated, actin dependent regulator of chromatin, subfamily a, member 5 [Source:HGNC Symbol;Acc:11101]	ortholog_one2one	ENSMUSP00000036270	ENSMUSG00000033721	apparent_ortholog_one2one	11	9	9	9	7	YES	YES	7	8	6	13.7	11	121.88	1052	16	16	16	1.7194e-51	10.6	11.4	8.1	189170000	67986000	68115000	53074000	2955900	1062300	1064300	829280
196	ENSMMUP00000001129	ENSMMUP00000001129	ENSMMUT00000001203	ENSMMUG00000000835	ENSMMUP00000001129|ENSMMUT00000001203|ENSMMUG00000000835|MSLN|mesothelin [Source:HGNC Symbol;Acc:7371]	ENSP00000372313	ENSG00000102854	MSLN	mesothelin [Source:HGNC Symbol;Acc:7371]	ortholog_one2one	ENSMUSP00000103000	ENSMUSG00000028364	apparent_ortholog_one2one	4	4	4	2	2	YES	YES	4	2	2	9.7	9.7	68.694	630	8	4	5	1.2671e-29	9.7	4.4	4.4	112630000	42744000	38802000	31086000	3218100	1221300	1108600	888170
197	ENSMMUP00000001141;ENSMMUP00000001140	ENSMMUP00000001141	ENSMMUT00000001215	ENSMMUG00000000844	ENSMMUP00000001141|ENSMMUT00000001215|ENSMMUG00000000844|TTC17|tetratricopeptide repeat domain 17 [Source:HGNC Symbol;Acc:25596];	ENSP00000039989	ENSG00000052841	TTC17	tetratricopeptide repeat domain 17 [Source:HGNC Symbol;Acc:25596]	ortholog_one2one	ENSMUSP00000023538	ENSMUSG00000022836	apparent_ortholog_one2one	2	2	1	2	1	YES	YES	1	2	1	2.9	2.9	108.91	957	1	3	2	1.114e-05	1.6	2.9	1.6	11912000	706590	10047000	1158300	201900	11976	170300	19632
198	ENSMMUP00000001148	ENSMMUP00000001148	ENSMMUT00000001222	ENSMMUG00000000853	ENSMMUP00000001148|ENSMMUT00000001222|ENSMMUG00000000853|MIOS|missing oocyte, meiosis regulator, homolog (Drosophila) [Source:HGNC Symbol;Acc:21905]	ENSP00000339881	ENSG00000164654	MIOS	missing oocyte, meiosis regulator, homolog (Drosophila) [Source:HGNC Symbol;Acc:21905]	ortholog_one2one	ENSMUSP00000109574	ENSMUSG00000026918	apparent_ortholog_one2one	8	8	6	7	7	YES	YES	6	7	7	13.5	13.5	98.562	875	8	11	9	5.7351e-39	9.1	11	11.7	90205000	24017000	36485000	29703000	1528900	407070	618390	503440
199	ENSMMUP00000001149;ENSMMUP00000030411	ENSMMUP00000001149	ENSMMUT00000001223	ENSMMUG00000000854	ENSMMUP00000001149|ENSMMUT00000001223|ENSMMUG00000000854|XM_001085403.1;						ENSMUSP00000064204	ENSMUSG00000028670	apparent_ortholog_one2one	4	4	4	3	4	YES	YES	4	3	4	62	62	13.686	121	21	21	22	3.4561e-125	62	43	62	573510000	203110000	161530000	208860000	63723000	22568000	17948000	23207000
200	ENSMMUP00000001151	ENSMMUP00000001151	ENSMMUT00000001226	ENSMMUG00000000857	ENSMMUP00000001151|ENSMMUT00000001226|ENSMMUG00000000857|ANXA4|annexin A4 [Source:HGNC Symbol;Acc:542]	ENSP00000377833	ENSG00000196975	ANXA4	annexin A4 [Source:HGNC Symbol;Acc:542]	ortholog_one2one				10	10	8	10	8	YES	YES	8	10	8	38	38	36.022	321	56	53	40	1.7812e-273	28.3	38	28.3	4109200000	1375300000	1748600000	985280000	171220000	57305000	72859000	41053000
205	ENSMMUP00000001172;ENSMMUP00000001174;ENSMMUP00000001173;ENSMMUP00000001175	ENSMMUP00000001172	ENSMMUT00000001251	ENSMMUG00000000878	ENSMMUP00000001172|ENSMMUT00000001251|ENSMMUG00000000878|Q4G3X7_MACMU|BUP/PIL protein Fragment [Source:UniProtKB/TrEMBL;Acc:Q4G3X7];	ENSP00000366032	ENSG00000148444	COMMD3	COMM domain containing 3 [Source:HGNC Symbol;Acc:23332]	ortholog_one2one				4	4	4	3	3	YES	YES	4	3	3	33.8	33.8	22.012	195	9	10	9	3.984e-71	33.8	22.6	22.6	96265000	51251000	26682000	18332000	8751400	4659200	2425600	1666600
206	ENSMMUP00000001179;ENSMMUP00000001177	ENSMMUP00000001179	ENSMMUT00000001258	ENSMMUG00000000880	ENSMMUP00000001179|ENSMMUT00000001258|ENSMMUG00000000880|LOC720075;	ENSP00000297029	ENSG00000006747	SCIN	scinderin [Source:HGNC Symbol;Acc:21695]	ortholog_one2one				14	14	13	12	10	YES	YES	13	12	10	32.2	32.2	80.442	715	23	20	19	1.3402e-117	28.8	26.3	20.4	422440000	152190000	158260000	111990000	9824200	3539400	3680400	2604400
207	ENSMMUP00000001186	ENSMMUP00000001186	ENSMMUT00000001265	ENSMMUG00000000886	ENSMMUP00000001186|ENSMMUT00000001265|ENSMMUG00000000886|RRS1|RRS1 ribosome biogenesis regulator homolog (S. cerevisiae) [Source:HGNC Symbol;Acc:17083]	ENSP00000322396	ENSG00000179041	RRS1	RRS1 ribosome biogenesis regulator homolog (S. cerevisiae) [Source:HGNC Symbol;Acc:17083]	ortholog_one2one				3	3	3	2	1	YES	YES	3	2	1	13.4	13.4	41.401	365	3	3	1	4.8475e-13	13.4	8.2	3.6	13141000	1722100	6424200	4994500	597310	78279	292010	227020
208	ENSMMUP00000001187	ENSMMUP00000001187	ENSMMUT00000001266	ENSMMUG00000000887	ENSMMUP00000001187|ENSMMUT00000001266|ENSMMUG00000000887|ADHFE1|alcohol dehydrogenase, iron containing, 1 [Source:HGNC Symbol;Acc:16354]	ENSP00000379865	ENSG00000147576	ADHFE1	alcohol dehydrogenase, iron containing, 1 [Source:HGNC Symbol;Acc:16354]	ortholog_one2one				2	2	1	1	2	YES	YES	1	1	2	7.8	7.8	50.745	472	1	1	2	1.156e-08	4	4	7.8	22878000	2845000	1620300	18413000	847340	105370	60011	681960
209	ENSMMUP00000001196;ENSMMUP00000001197	ENSMMUP00000001196	ENSMMUT00000001276	ENSMMUG00000000896	ENSMMUP00000001196|ENSMMUT00000001276|ENSMMUG00000000896|LOC714172;	ENSP00000378332	ENSG00000140682	TGFB1I1	transforming growth factor beta 1 induced transcript 1 [Source:HGNC Symbol;Acc:11767]	ortholog_one2one				12	12	8	9	12	YES	YES	8	9	12	52.7	52.7	47.939	444	30	30	38	1.6502e-274	36.9	36.5	52.7	1217100000	331250000	445890000	439940000	48683000	13250000	17836000	17598000
210	ENSMMUP00000001201;ENSMMUP00000001203	ENSMMUP00000001201	ENSMMUT00000001281	ENSMMUG00000000899	ENSMMUP00000001201|ENSMMUT00000001281|ENSMMUG00000000899|LOC714281;	ENSP00000317579	ENSG00000140688	C16orf58	chromosome 16 open reading frame 58 [Source:HGNC Symbol;Acc:25848]	ortholog_one2one				3	3	3	2	2	YES	YES	3	2	2	13.7	13.7	51.184	468	5	5	2	4.4655e-60	13.7	7.9	7.9	79473000	30446000	34483000	14544000	3612400	1383900	1567400	661110
212	ENSMMUP00000001206	ENSMMUP00000001206	ENSMMUT00000001286	ENSMMUG00000000900	ENSMMUP00000001206|ENSMMUT00000001286|ENSMMUG00000000900|ADPRH|ADP-ribosylarginine hydrolase [Source:HGNC Symbol;Acc:269]	ENSP00000420200	ENSG00000144843	ADPRH	ADP-ribosylarginine hydrolase [Source:HGNC Symbol;Acc:269]	ortholog_one2one				6	6	4	4	3	YES	YES	4	4	3	28	28	39.589	357	6	6	4	4.0013e-19	16.2	16.2	16.8	83018000	18643000	39827000	24549000	3953300	887760	1896500	1169000
213	ENSMMUP00000001216	ENSMMUP00000001216	ENSMMUT00000001296	ENSMMUG00000000908	ENSMMUP00000001216|ENSMMUT00000001296|ENSMMUG00000000908|SUCLG1|succinate-CoA ligase, alpha subunit [Source:HGNC Symbol;Acc:11449]	ENSP00000377446	ENSG00000163541	SUCLG1	succinate-CoA ligase, alpha subunit [Source:HGNC Symbol;Acc:11449]	ortholog_one2one				4	4	3	3	3	YES	YES	3	3	3	25.1	25.1	33.13	315	9	10	8	2.2154e-19	17.5	20	17.5	792020000	395160000	166350000	230500000	56573000	28226000	11882000	16464000
214	ENSMMUP00000001232;ENSMMUP00000001238	ENSMMUP00000001232	ENSMMUT00000001312	ENSMMUG00000000917	ENSMMUP00000001232|ENSMMUT00000001312|ENSMMUG00000000917;									5	5	5	5	4	YES	YES	5	5	4	41.8	41.8	29.384	263	38	27	25	5.8387e-218	41.8	41.8	34.6	2848500000	1160000000	791880000	896600000	189900000	77332000	52792000	59773000
215	ENSMMUP00000001234	ENSMMUP00000001234	ENSMMUT00000001314	ENSMMUG00000012324	ENSMMUP00000001234|ENSMMUT00000001314|ENSMMUG00000012324|XM_001101789.1									4	1	4	4	2	YES	YES	1	1	1	21.7	5.1	31.194	276	4	2	2	3.4253e-80	21.7	21.7	12.7	82998000	56398000	17696000	8903500	3952300	2685600	842650	423980
216	ENSMMUP00000001248;ENSMMUP00000001249	ENSMMUP00000001248	ENSMMUT00000001329	ENSMMUG00000000932	ENSMMUP00000001248|ENSMMUT00000001329|ENSMMUG00000000932|PPP2R3A|protein phosphatase 2, regulatory subunit B, alpha [Source:HGNC Symbol;Acc:9307];	ENSP00000264977	ENSG00000073711	PPP2R3A	protein phosphatase 2, regulatory subunit B'', alpha [Source:HGNC Symbol;Acc:9307]	ortholog_one2one				2	2	1	2	2	YES	YES	1	2	2	2.1	2.1	130.09	1150	1	2	2	4.4062e-12	1.2	2.1	2.1	3973700	93864	2566600	1313300	63075	1489.9	40739	20846
217	ENSMMUP00000001266;ENSMMUP00000001267	ENSMMUP00000001266	ENSMMUT00000001348	ENSMMUG00000000943	ENSMMUP00000001266|ENSMMUT00000001348|ENSMMUG00000000943|ERLIN2|ER lipid raft associated 2 [Source:HGNC Symbol;Acc:1356]	ENSP00000276461	ENSG00000147475	ERLIN2	ER lipid raft associated 2 [Source:HGNC Symbol;Acc:1356]	ortholog_one2one				10	9	9	9	8	YES	YES	8	8	7	38.9	38.9	37.805	339	45	51	46	1.0276e-188	31.9	38.3	31.3	2558000000	763490000	1090600000	703990000	106590000	31812000	45440000	29333000
218	ENSMMUP00000001269	ENSMMUP00000001269	ENSMMUT00000001351	ENSMMUG00000000945	ENSMMUP00000001269|ENSMMUT00000001351|ENSMMUG00000000945|PROSC|proline synthetase co-transcribed homolog (bacterial) [Source:HGNC Symbol;Acc:9457]	ENSP00000333551	ENSG00000147471	PROSC	proline synthetase co-transcribed homolog (bacterial) [Source:HGNC Symbol;Acc:9457]	ortholog_one2one				3	3	3	3	3	YES	YES	3	3	3	17.5	17.5	30.385	275	13	16	11	2.7423e-108	17.5	17.5	17.5	358650000	140400000	113870000	104380000	22416000	8774900	7116900	6523900
219	ENSMMUP00000001270	ENSMMUP00000001270	ENSMMUT00000001352	ENSMMUG00000000946	ENSMMUP00000001270|ENSMMUT00000001352|ENSMMUG00000000946|CPM|carboxypeptidase M [Source:HGNC Symbol;Acc:2311]	ENSP00000448517	ENSG00000135678	CPM	carboxypeptidase M [Source:HGNC Symbol;Acc:2311]	ortholog_one2one				3	3	2	3	3	YES	YES	2	3	3	11.2	11.2	44.821	393	5	4	5	2.3564e-11	7.1	11.2	11.2	229910000	69752000	70589000	89570000	12101000	3671100	3715200	4714200
220	ENSMMUP00000001276;ENSMMUP00000001277	ENSMMUP00000001276	ENSMMUT00000001358	ENSMMUG00000000951	ENSMMUP00000001276|ENSMMUT00000001358|ENSMMUG00000000951|ITGB2|integrin, beta 2 (complement component 3 receptor 3 and 4 subunit) [Source:HGNC Symbol;Acc:6155];	ENSP00000380948	ENSG00000160255	ITGB2	integrin, beta 2 (complement component 3 receptor 3 and 4 subunit) [Source:HGNC Symbol;Acc:6155]	ortholog_one2one				13	13	12	13	10	YES	YES	12	13	10	20.4	20.4	85.051	771	55	54	50	1.5977e-200	18.5	20.4	16.6	3180100000	1242600000	968230000	969270000	63602000	24852000	19365000	19385000
221	ENSMMUP00000001283;ENSMMUP00000001284	ENSMMUP00000001283	ENSMMUT00000001365	ENSMMUG00000000955	ENSMMUP00000001283|ENSMMUT00000001365|ENSMMUG00000000955|USP15|ubiquitin specific peptidase 15 [Source:HGNC Symbol;Acc:12613];	ENSP00000280377	ENSG00000135655	USP15	ubiquitin specific peptidase 15 [Source:HGNC Symbol;Acc:12613]	ortholog_one2one				9	9	7	6	7	YES	YES	7	6	7	17.3	17.3	112.42	981	13	13	15	1.5987e-211	13.6	10.6	12.9	190880000	53416000	83066000	54394000	3408500	953850	1483300	971310
222	ENSMMUP00000001286	ENSMMUP00000001286	ENSMMUT00000001368	ENSMMUG00000000956	ENSMMUP00000001286|ENSMMUT00000001368|ENSMMUG00000000956|MON2|MON2 homolog (S. cerevisiae) [Source:HGNC Symbol;Acc:29177]	ENSP00000377252	ENSG00000061987	MON2	MON2 homolog (S. cerevisiae) [Source:HGNC Symbol;Acc:29177]	ortholog_one2one				5	5	2	3	4	YES	YES	2	3	4	3.1	3.1	189.47	1715	4	7	9	6.2579e-15	1.6	1.6	3	30566000	8159200	7907700	14499000	332240	88687	85954	157600
223	ENSMMUP00000001290;ENSMMUP00000010002;ENSMMUP00000035423	ENSMMUP00000001290	ENSMMUT00000001372	ENSMMUG00000000960	ENSMMUP00000001290|ENSMMUT00000001372|ENSMMUG00000000960|WDR1|WD repeat domain 1 [Source:HGNC Symbol;Acc:12754];	ENSP00000427687	ENSG00000071127	WDR1	WD repeat domain 1 [Source:HGNC Symbol;Acc:12754]	ortholog_one2one				15	15	14	15	14	YES	YES	14	15	14	44.1	44.1	66.476	608	104	84	95	0	42.4	44.1	38.5	10952000000	4352900000	3292800000	3306200000	304220000	120920000	91466000	91840000
225	ENSMMUP00000001311;ENSMMUP00000036559	ENSMMUP00000001311	ENSMMUT00000001393	ENSMMUG00000000974	ENSMMUP00000001311|ENSMMUT00000001393|ENSMMUG00000000974|MSH2|mutS homolog 2, colon cancer, nonpolyposis type 1 (E. coli) [Source:HGNC Symbol;Acc:7325]	ENSP00000233146	ENSG00000095002	MSH2	mutS homolog 2, colon cancer, nonpolyposis type 1 (E. coli) [Source:HGNC Symbol;Acc:7325]	ortholog_one2one				6	6	5	4	4	YES	YES	5	4	4	10.1	10.1	96.846	861	14	14	15	8.4362e-74	8.7	7.8	7.8	157220000	39617000	72723000	44882000	3275400	825340	1515100	935030
227	ENSMMUP00000001318;ENSMMUP00000032475	ENSMMUP00000001318	ENSMMUT00000001401	ENSMMUG00000000982	ENSMMUP00000001318|ENSMMUT00000001401|ENSMMUG00000000982|PPP4C|protein phosphatase 4, catalytic subunit [Source:HGNC Symbol;Acc:9319];	ENSP00000279387	ENSG00000149923	PPP4C	protein phosphatase 4, catalytic subunit [Source:HGNC Symbol;Acc:9319]	ortholog_one2one				5	4	3	4	3	YES	YES	2	3	2	27	22.5	35.08	307	3	8	2	1.6182e-31	20.2	22.8	15	54934000	14338000	31328000	9268200	3051900	796550	1740500	514900
228	ENSMMUP00000001319;ENSMMUP00000032476;ENSMMUP00000032477;ENSMMUP00000032478;ENSMMUP00000032479;ENSMMUP00000039391	ENSMMUP00000001319	ENSMMUT00000001402	ENSMMUG00000000983	ENSMMUP00000001319|ENSMMUT00000001402|ENSMMUG00000000983|ALDOA;	ENSP00000378669	ENSG00000149925	ALDOA	aldolase A, fructose-bisphosphate [Source:HGNC Symbol;Acc:414]	ortholog_one2one				15	14	13	13	11	YES	YES	12	12	10	60.7	53	39.429	364	91	88	85	0	60.7	58.8	51.6	12812000000	5064600000	4043900000	3703600000	533840000	211020000	168500000	154320000
229	ENSMMUP00000001322;ENSMMUP00000038931	ENSMMUP00000001322	ENSMMUT00000001405	ENSMMUG00000000985	ENSMMUP00000001322|ENSMMUT00000001405|ENSMMUG00000000985|PLCD1|phospholipase C, delta 1 [Source:HGNC Symbol;Acc:9060];	ENSP00000430344	ENSG00000187091	PLCD1	phospholipase C, delta 1 [Source:HGNC Symbol;Acc:9060]	ortholog_one2one				11	11	10	9	11	YES	YES	10	9	11	27.5	27.5	85.764	756	28	30	31	0	26.2	24.5	27.5	1466800000	421470000	519430000	525920000	38601000	11091000	13669000	13840000
230	ENSMMUP00000001337;ENSMMUP00000001336;ENSMMUP00000038943;ENSMMUP00000001334;ENSMMUP00000038939	ENSMMUP00000001337	ENSMMUT00000001420	ENSMMUG00000000990	ENSMMUP00000001337|ENSMMUT00000001420|ENSMMUG00000000990|ACAA1|acetyl-CoA acyltransferase 1 [Source:HGNC Symbol;Acc:82];	ENSP00000333664	ENSG00000060971	ACAA1	acetyl-CoA acyltransferase 1 [Source:HGNC Symbol;Acc:82]	ortholog_one2one				9	9	8	9	8	YES	YES	8	9	8	33	33	47.406	454	30	40	34	8.4273e-136	26.9	33	26.9	489680000	114640000	222400000	152630000	24484000	5732200	11120000	7631500
231	ENSMMUP00000001338	ENSMMUP00000001338	ENSMMUT00000001421	ENSMMUG00000000994	ENSMMUP00000001338|ENSMMUT00000001421|ENSMMUG00000000994|EPS15L1|epidermal growth factor receptor pathway substrate 15-like 1 [Source:HGNC Symbol;Acc:24634]	ENSP00000393313	ENSG00000127527	EPS15L1	epidermal growth factor receptor pathway substrate 15-like 1 [Source:HGNC Symbol;Acc:24634]	ortholog_one2one				17	17	10	12	11	YES	YES	10	12	11	30.7	30.7	93.138	854	18	19	21	3.5913e-145	18.4	20.4	22.6	230470000	45401000	103240000	81830000	4519000	890220	2024200	1604500
232	ENSMMUP00000001340	ENSMMUP00000001340	ENSMMUT00000001423	ENSMMUG00000000996	ENSMMUP00000001340|ENSMMUT00000001423|ENSMMUG00000000996|OXSR1|oxidative-stress responsive 1 [Source:HGNC Symbol;Acc:8508]	ENSP00000311713	ENSG00000172939	OXSR1	oxidative-stress responsive 1 [Source:HGNC Symbol;Acc:8508]	ortholog_one2one				5	5	4	5	5	YES	YES	4	5	5	12.1	12.1	58.078	527	9	8	11	2.108e-57	8.5	12.1	12.1	133240000	43792000	48828000	40623000	4758700	1564000	1743900	1450800
235	ENSMMUP00000001350	ENSMMUP00000001350	ENSMMUT00000001435	ENSMMUG00000001006	ENSMMUP00000001350|ENSMMUT00000001435|ENSMMUG00000001006|DDX50|DEAD (Asp-Glu-Ala-Asp) box polypeptide 50 [Source:HGNC Symbol;Acc:17906]	ENSP00000362687	ENSG00000107625	DDX50	DEAD (Asp-Glu-Ala-Asp) box polypeptide 50 [Source:HGNC Symbol;Acc:17906]	ortholog_one2one				6	6	4	2	2	YES	YES	4	2	2	12.2	12.2	82.564	737	7	9	7	3.7405e-44	10.7	4.5	4.9	57186000	27323000	16771000	13091000	1361600	650550	399320	311700
236	ENSMMUP00000001353	ENSMMUP00000001353	ENSMMUT00000001438	ENSMMUG00000001008	ENSMMUP00000001353|ENSMMUT00000001438|ENSMMUG00000001008|XR_012522.1									24	22	16	19	19	YES	YES	15	18	17	10.3	9.9	396.52	3412	36	42	39	1.482e-211	7.4	8.9	7.7	349090000	95838000	126420000	126830000	1419100	389590	513890	515590
238	ENSMMUP00000001368;ENSMMUP00000001369;ENSMMUP00000001367;ENSMMUP00000038351;ENSMMUP00000001371	ENSMMUP00000001368	ENSMMUT00000001454	ENSMMUG00000001021	ENSMMUP00000001368|ENSMMUT00000001454|ENSMMUG00000001021|LOC721247;	ENSP00000340900	ENSG00000154305	MIA3	melanoma inhibitory activity family, member 3 [Source:HGNC Symbol;Acc:24008]	ortholog_one2one				9	9	7	8	6	YES	YES	7	8	6	7.7	7.7	212.76	1904	11	17	14	1.5593e-66	6.6	7	5.6	184560000	41511000	64711000	78341000	1488400	334770	521860	631780
239	ENSMMUP00000001372;ENSMMUP00000001370;ENSMMUP00000036740	ENSMMUP00000001372	ENSMMUT00000001458	ENSMMUG00000001022	ENSMMUP00000001372|ENSMMUT00000001458|ENSMMUG00000001022|XM_001119291.1;									7	0	6	7	5	YES	YES	0	0	0	31.1	0	36.104	331	3	4	2	2.2715e-198	29.6	31.1	25.4	198100000	42641000	87951000	67513000	19810000	4264100	8795100	6751300
240	ENSMMUP00000001373	ENSMMUP00000001373	ENSMMUT00000001459	ENSMMUG00000031247	ENSMMUP00000001373|ENSMMUT00000001459|ENSMMUG00000031247									4	1	3	4	3	YES	YES	1	1	1	30.6	11.7	22.171	196	2	2	2	7.9696e-156	28.1	30.6	28.1	15579000	7836400	1577100	6165600	2225600	1119500	225310	880790
241	ENSMMUP00000001376	ENSMMUP00000001376	ENSMMUT00000001463	ENSMMUG00000001026	ENSMMUP00000001376|ENSMMUT00000001463|ENSMMUG00000001026|BLMH|bleomycin hydrolase [Source:HGNC Symbol;Acc:1059]	ENSP00000261714	ENSG00000108578	BLMH	bleomycin hydrolase [Source:HGNC Symbol;Acc:1059]	ortholog_one2one				2	2	2	2	2	YES	YES	2	2	2	6	6	52.027	452	11	9	10	3.5372e-34	6	6	6	354380000	121970000	129660000	102740000	12657000	4356200	4630900	3669500
242	ENSMMUP00000001377	ENSMMUP00000001377	ENSMMUT00000001464	ENSMMUG00000001027	ENSMMUP00000001377|ENSMMUT00000001464|ENSMMUG00000001027									21	3	19	21	18	YES	YES	3	3	2	55.2	7.4	56.98	529	11	13	11	0	49.7	55.2	48	2183700000	769400000	785690000	628570000	70441000	24819000	25345000	20276000
243	ENSMMUP00000001382	ENSMMUP00000001382	ENSMMUT00000001469	ENSMMUG00000001031	ENSMMUP00000001382|ENSMMUT00000001469|ENSMMUG00000001031|ABHD5|abhydrolase domain containing 5 [Source:HGNC Symbol;Acc:21396]	ENSP00000390849	ENSG00000011198	ABHD5	abhydrolase domain containing 5 [Source:HGNC Symbol;Acc:21396]	ortholog_one2one				3	3	2	1	2	YES	YES	2	1	2	14.3	14.3	39.181	349	2	1	2	2.2009e-41	8.6	4.6	10.3	8420900	4064600	1016600	3339700	382770	184750	46210	151800
245	ENSMMUP00000001393;ENSMMUP00000001394	ENSMMUP00000001393	ENSMMUT00000001482	ENSMMUG00000001039	ENSMMUP00000001393|ENSMMUT00000001482|ENSMMUG00000001039|PROZ|protein Z, vitamin K-dependent plasma glycoprotein [Source:HGNC Symbol;Acc:9460];	ENSP00000344458	ENSG00000126231	PROZ	protein Z, vitamin K-dependent plasma glycoprotein [Source:HGNC Symbol;Acc:9460]	ortholog_one2one				2	2	1	1	2	YES	YES	1	1	2	4.2	4.2	47.308	424	4	3	4	2.6284e-37	2.8	2.8	4.2	24829000	9497900	9437000	5894000	1182300	452280	449380	280670
246	ENSMMUP00000001401;ENSMMUP00000018126;ENSMMUP00000001397;ENSMMUP00000001398	ENSMMUP00000001401	ENSMMUT00000001490	ENSMMUG00000001041	ENSMMUP00000001401|ENSMMUT00000001490|ENSMMUG00000001041|LOC714247;	ENSP00000246505	ENSG00000126226	PCID2	PCI domain containing 2 [Source:HGNC Symbol;Acc:25653]	ortholog_one2one				5	5	4	2	5	YES	YES	4	2	5	15.9	15.9	52.22	453	8	5	10	3.7498e-100	12.6	7.1	15.9	201380000	63183000	69657000	68539000	5922900	1858300	2048700	2015900
247	ENSMMUP00000001399;ENSMMUP00000032525	ENSMMUP00000001399	ENSMMUT00000001488	ENSMMUG00000001044	ENSMMUP00000001399|ENSMMUT00000001488|ENSMMUG00000001044|AKT1;	ENSP00000451828	ENSG00000142208	AKT1	v-akt murine thymoma viral oncogene homolog 1 [Source:HGNC Symbol;Acc:391]	ortholog_one2one				7	6	6	3	5	YES	YES	5	2	4	20.4	17.1	55.697	480	11	9	11	1.4233e-38	17.7	9	16.9	110790000	28914000	50379000	31499000	3077600	803170	1399400	874970
248	ENSMMUP00000001409	ENSMMUP00000001409	ENSMMUT00000001498	ENSMMUG00000001051	ENSMMUP00000001409|ENSMMUT00000001498|ENSMMUG00000001051|MAP2K6|mitogen-activated protein kinase kinase 6 [Source:HGNC Symbol;Acc:6846]	ENSP00000468348	ENSG00000108984	MAP2K6	mitogen-activated protein kinase kinase 6 [Source:HGNC Symbol;Acc:6846]	ortholog_one2one				2	2	1	1	2	YES	YES	1	1	2	10.2	10.2	37.492	334	2	2	5	1.0343e-14	6	6	10.2	76358000	34219000	20753000	21386000	3181600	1425800	864710	891080
249	ENSMMUP00000001412;ENSMMUP00000001413	ENSMMUP00000001412	ENSMMUT00000001501	ENSMMUG00000001054	ENSMMUP00000001412|ENSMMUT00000001501|ENSMMUG00000001054|EEF1B2;	ENSP00000376056	ENSG00000114942	EEF1B2	eukaryotic translation elongation factor 1 beta 2 [Source:HGNC Symbol;Acc:3208]	ortholog_one2one				5	5	5	5	4	YES	YES	5	5	4	37.3	37.3	24.733	225	26	28	25	1.9646e-156	37.3	37.3	34.7	2093500000	600910000	825350000	667260000	139570000	40061000	55023000	44484000
250	ENSMMUP00000001417	ENSMMUP00000001417	ENSMMUT00000001506	ENSMMUG00000001058	ENSMMUP00000001417|ENSMMUT00000001506|ENSMMUG00000001058|TTC28|tetratricopeptide repeat domain 28 [Source:HGNC Symbol;Acc:29179]	ENSP00000381003	ENSG00000100154	TTC28	tetratricopeptide repeat domain 28 [Source:HGNC Symbol;Acc:29179]	ortholog_one2one				3	3	2	2	2	YES	YES	2	2	2	2.4	2.4	270.82	2481	2	2	2	7.3518e-13	1.6	1.6	1.7	16808000	5825100	6007300	4975800	116720	40452	41717	34554
252	ENSMMUP00000001422	ENSMMUP00000001422	ENSMMUT00000001511	ENSMMUG00000001062	ENSMMUP00000001422|ENSMMUT00000001511|ENSMMUG00000001062	ENSP00000262056	ENSG00000063046	EIF4B	eukaryotic translation initiation factor 4B [Source:HGNC Symbol;Acc:3285]	ortholog_one2one				2	2	1	1	2	YES	YES	1	1	2	8.1	8.1	68.616	606	8	7	10	3.7982e-64	3.5	3.5	8.1	142550000	37404000	42020000	63129000	4072900	1068700	1200600	1803700
253	ENSMMUP00000038997;ENSMMUP00000001433	ENSMMUP00000038997	ENSMMUT00000045957	ENSMMUG00000001074	ENSMMUP00000038997|ENSMMUT00000045957|ENSMMUG00000001074;									2	2	1	1	2	YES	YES	1	1	2	6.4	6.4	59.788	529	1	2	2	1.6247e-41	2.8	2.8	6.4	1862400	449270	970450	442630	60076	14493	31305	14278
254	ENSMMUP00000001438	ENSMMUP00000001438	ENSMMUT00000001530	ENSMMUG00000001079	ENSMMUP00000001438|ENSMMUT00000001530|ENSMMUG00000001079|XM_001089356.1	ENSP00000378743	ENSG00000162433	AK4	adenylate kinase 4 [Source:HGNC Symbol;Acc:363]	ortholog_one2one				4	4	4	2	3	YES	YES	4	2	3	29.1	29.1	25.323	223	9	3	4	2.2905e-09	29.1	5.4	13	28734000	23003000	2190100	3541200	1795900	1437700	136880	221320
255	ENSMMUP00000001439	ENSMMUP00000001439	ENSMMUT00000001531	ENSMMUG00000001078	ENSMMUP00000001439|ENSMMUT00000001531|ENSMMUG00000001078|ATP6V1C1|ATPase, H+ transporting, lysosomal 42kDa, V1 subunit C1 [Source:HGNC Symbol;Acc:856]	ENSP00000379203	ENSG00000155097	ATP6V1C1	ATPase, H+ transporting, lysosomal 42kDa, V1 subunit C1 [Source:HGNC Symbol;Acc:856]	ortholog_one2one				8	8	7	8	5	YES	YES	7	8	5	34.6	34.6	43.941	382	19	25	20	1.3906e-168	29.3	34.6	23	351780000	96244000	150890000	104650000	12564000	3437300	5389000	3737400
257	ENSMMUP00000001461	ENSMMUP00000001461	ENSMMUT00000001554	ENSMMUG00000001097	ENSMMUP00000001461|ENSMMUT00000001554|ENSMMUG00000001097|GSTZ1|glutathione transferase zeta 1 [Source:HGNC Symbol;Acc:4643]	ENSP00000216465	ENSG00000100577	GSTZ1	glutathione S-transferase zeta 1 [Source:HGNC Symbol;Acc:4643]	ortholog_one2one				6	6	5	5	4	YES	YES	5	5	4	46.8	46.8	24.058	216	13	11	13	1.9602e-73	35.6	38.9	32.9	232060000	73436000	100200000	58430000	17851000	5648900	7707300	4494600
258	ENSMMUP00000001485;ENSMMUP00000035581;ENSMMUP00000035580	ENSMMUP00000001485	ENSMMUT00000001579	ENSMMUG00000001118	ENSMMUP00000001485|ENSMMUT00000001579|ENSMMUG00000001118|BRWD2|WD repeat domain 11 [Source:HGNC Symbol;Acc:13831];	ENSP00000263461	ENSG00000120008	WDR11	WD repeat domain 11 [Source:HGNC Symbol;Acc:13831]	ortholog_one2one				5	5	3	3	4	YES	YES	3	3	4	6.3	6.3	136.73	1224	4	7	7	8.5725e-29	3.2	3.6	5.5	51798000	12667000	19928000	19203000	709570	173520	272990	263060
259	ENSMMUP00000001495	ENSMMUP00000001495	ENSMMUT00000001589	ENSMMUG00000001126	ENSMMUP00000001495|ENSMMUT00000001589|ENSMMUG00000001126|TIA1|TIA1 cytotoxic granule-associated RNA binding protein [Source:HGNC Symbol;Acc:11802]	ENSP00000401371	ENSG00000116001	TIA1	TIA1 cytotoxic granule-associated RNA binding protein [Source:HGNC Symbol;Acc:11802]	ortholog_one2one				5	1	5	4	5	YES	YES	1	1	1	22.8	5.7	42.936	386	1	1	1	1.2432e-118	22.8	16.3	22.8	43170000	14657000	11181000	17332000	2398300	814260	621160	962910
262	ENSMMUP00000001509;ENSMMUP00000001508	ENSMMUP00000001509	ENSMMUT00000001605	ENSMMUG00000001137	ENSMMUP00000001509|ENSMMUT00000001605|ENSMMUG00000001137|MTAP|methylthioadenosine phosphorylase [Source:HGNC Symbol;Acc:7413];	ENSP00000369519	ENSG00000099810	MTAP	methylthioadenosine phosphorylase [Source:HGNC Symbol;Acc:7413]	ortholog_one2one				5	5	5	5	5	YES	YES	5	5	5	33.2	33.2	31.236	283	31	33	28	1.3083e-111	33.2	33.2	33.2	1243200000	367630000	516490000	359120000	65434000	19349000	27184000	18901000
264	ENSMMUP00000001529	ENSMMUP00000001529	ENSMMUT00000001625	ENSMMUG00000001154	ENSMMUP00000001529|ENSMMUT00000001625|ENSMMUG00000001154|NUDT16|nudix (nucleoside diphosphate linked moiety X)-type motif 16 [Source:HGNC Symbol;Acc:26442]	ENSP00000422375	ENSG00000198585	NUDT16	nudix (nucleoside diphosphate linked moiety X)-type motif 16 [Source:HGNC Symbol;Acc:26442]	ortholog_one2one				9	8	8	8	8	YES	YES	7	8	7	60	60	21.161	195	29	28	26	5.2589e-181	60	60	52.8	464180000	156990000	188660000	118530000	38682000	13083000	15721000	9877900
265	ENSMMUP00000001532;ENSMMUP00000001534;ENSMMUP00000001535	ENSMMUP00000001532	ENSMMUT00000001628	ENSMMUG00000001155	ENSMMUP00000001532|ENSMMUT00000001628|ENSMMUG00000001155|ACSL5|acyl-CoA synthetase long-chain family member 5 [Source:HGNC Symbol;Acc:16526];	ENSP00000348429	ENSG00000197142	ACSL5	acyl-CoA synthetase long-chain family member 5 [Source:HGNC Symbol;Acc:16526]	ortholog_one2one				10	10	10	9	7	YES	YES	10	9	7	23.7	23.7	76.168	683	20	18	16	1.4074e-214	23.7	23.4	19.2	375040000	147110000	140480000	87452000	10418000	4086400	3902100	2429200
267	ENSMMUP00000001548;ENSMMUP00000001549	ENSMMUP00000001548	ENSMMUT00000001644	ENSMMUG00000001167	ENSMMUP00000001548|ENSMMUT00000001644|ENSMMUG00000001167|TRMT1|TRM1 tRNA methyltransferase 1 homolog (S. cerevisiae) [Source:HGNC Symbol;Acc:25980];	ENSP00000466967	ENSG00000104907	TRMT1	tRNA methyltransferase 1 homolog (S. cerevisiae) [Source:HGNC Symbol;Acc:25980]	ortholog_one2one				4	4	4	2	2	YES	YES	4	2	2	11.6	11.6	72.048	657	8	6	5	1.3121e-25	11.6	5	5	68008000	29425000	21860000	16724000	1658700	717680	533170	407900
268	ENSMMUP00000001560;ENSMMUP00000039830;ENSMMUP00000039827;ENSMMUP00000039829	ENSMMUP00000001560	ENSMMUT00000001656	ENSMMUG00000001169	ENSMMUP00000001560|ENSMMUT00000001656|ENSMMUG00000001169|ZNF148;	ENSP00000353863	ENSG00000163848	ZNF148	zinc finger protein 148 [Source:HGNC Symbol;Acc:12933]	ortholog_one2one				4	4	3	4	3	YES	YES	3	4	3	7.1	7.1	89.065	794	8	10	11	3.1784e-49	4.5	7.1	4.5	72643000	17719000	38457000	16467000	1816100	442970	961420	411680
269	ENSMMUP00000001567;ENSMMUP00000036406;ENSMMUP00000036407	ENSMMUP00000001567	ENSMMUT00000001663	ENSMMUG00000001176	ENSMMUP00000001567|ENSMMUT00000001663|ENSMMUG00000001176|SPG20;	ENSP00000414147	ENSG00000133104	SPG20	spastic paraplegia 20 (Troyer syndrome) [Source:HGNC Symbol;Acc:18514]	ortholog_one2one				3	3	2	2	2	YES	YES	2	2	2	8	8	72.757	666	5	2	4	1.2839e-31	5.3	5	5.3	211410000	19588000	19930000	171890000	6406300	593570	603940	5208800
270	ENSMMUP00000001570;ENSMMUP00000001571	ENSMMUP00000001570	ENSMMUT00000001666	ENSMMUG00000001179	ENSMMUP00000001570|ENSMMUT00000001666|ENSMMUG00000001179|LOC715120;	ENSP00000408979	ENSG00000155980	KIF5A	kinesin family member 5A [Source:HGNC Symbol;Acc:6323]	ortholog_one2one				5	5	5	5	4	YES	YES	5	5	4	13.1	13.1	47.356	421	7	10	9	5.0692e-25	13.1	13.1	12.6	39418000	8020400	22456000	8941400	1576700	320820	898250	357650
271	ENSMMUP00000001575	ENSMMUP00000001575	ENSMMUT00000001671	ENSMMUG00000031819	ENSMMUP00000001575|ENSMMUT00000001671|ENSMMUG00000031819|A2D695_MACMU|SLC26A10 Fragment [Source:UniProtKB/TrEMBL;Acc:A2D695]	ENSP00000335560	ENSG00000240771	ARHGEF25	Rho guanine nucleotide exchange factor (GEF) 25 [Source:HGNC Symbol;Acc:30275]	ortholog_one2one				2	2	2	1	1	YES	YES	2	1	1	4.9	4.9	62.731	571	2	1	2	1.0597e-11	4.9	3	1.9	6903600	4002500	2075800	825290	222700	129110	66962	26622
272	ENSMMUP00000001581	ENSMMUP00000001581	ENSMMUT00000001677	ENSMMUG00000001183	ENSMMUP00000001581|ENSMMUT00000001677|ENSMMUG00000001183|NOLC1|nucleolar and coiled-body phosphoprotein 1 [Source:HGNC Symbol;Acc:15608]	ENSP00000359024	ENSG00000166197	NOLC1	nucleolar and coiled-body phosphoprotein 1 [Source:HGNC Symbol;Acc:15608]	ortholog_one2one				4	4	4	2	1	YES	YES	4	2	1	6.9	6.9	74.892	711	7	2	2	4.5619e-09	6.9	3.1	1	25835000	11361000	4382000	10092000	587150	258200	99591	229360
273	ENSMMUP00000001584;ENSMMUP00000038896;ENSMMUP00000038899	ENSMMUP00000001584	ENSMMUT00000001680	ENSMMUG00000001185	ENSMMUP00000001584|ENSMMUT00000001680|ENSMMUG00000001185|Q8WMQ0_MACMU|Transformer-2 beta Fragment [Source:UniProtKB/TrEMBL;Acc:Q8WMQ0];	ENSP00000416959	ENSG00000136527	TRA2B	transformer 2 beta homolog (Drosophila) [Source:HGNC Symbol;Acc:10781]	ortholog_one2one				2	2	2	2	2	YES	YES	2	2	2	10.4	10.4	33.665	288	18	10	16	2.8426e-13	10.4	10.4	10.4	974650000	353160000	309110000	312390000	81221000	29430000	25759000	26032000
274	ENSMMUP00000001594	ENSMMUP00000001594	ENSMMUT00000001690	ENSMMUG00000001191	ENSMMUP00000001594|ENSMMUT00000001690|ENSMMUG00000001191|TIMM13|translocase of inner mitochondrial membrane 13 homolog (yeast) [Source:HGNC Symbol;Acc:11816]	ENSP00000215570	ENSG00000099800	TIMM13	translocase of inner mitochondrial membrane 13 homolog (yeast) [Source:HGNC Symbol;Acc:11816]	ortholog_one2one				2	2	2	2	2	YES	YES	2	2	2	26.3	26.3	10.53	95	3	2	2	1.6821e-20	26.3	26.3	26.3	36139000	18308000	7303000	10528000	6023200	3051300	1217200	1754700
275	ENSMMUP00000001595	ENSMMUP00000001595	ENSMMUT00000001691	ENSMMUG00000001192	ENSMMUP00000001595|ENSMMUT00000001691|ENSMMUG00000001192|LMNB2|lamin B2 [Source:HGNC Symbol;Acc:6638]	ENSP00000327054	ENSG00000176619	LMNB2	lamin B2 [Source:HGNC Symbol;Acc:6638]	ortholog_one2one				15	15	11	11	12	YES	YES	11	11	12	40.5	40.5	57.645	514	59	75	55	0	26.8	34	35.2	3707600000	1194100000	1640600000	872910000	109050000	35121000	48252000	25674000
277	ENSMMUP00000001602;ENSMMUP00000001603;ENSMMUP00000001604	ENSMMUP00000001602	ENSMMUT00000001698	ENSMMUG00000001199	ENSMMUP00000001602|ENSMMUT00000001698|ENSMMUG00000001199|SETD3|SET domain containing 3 [Source:HGNC Symbol;Acc:20493];	ENSP00000327436	ENSG00000183576	SETD3	SET domain containing 3 [Source:HGNC Symbol;Acc:20493]	ortholog_one2one				6	6	5	4	3	YES	YES	5	4	3	15	15	67.472	595	5	4	3	7.158e-23	11.6	10.3	6.4	31484000	13397000	10854000	7232100	767900	326760	264740	176390
278	ENSMMUP00000001610	ENSMMUP00000001610	ENSMMUT00000001709	ENSMMUG00000001205	ENSMMUP00000001610|ENSMMUT00000001709|ENSMMUG00000001205|TTC37|tetratricopeptide repeat domain 37 [Source:HGNC Symbol;Acc:23639]	ENSP00000351596	ENSG00000198677	TTC37	tetratricopeptide repeat domain 37 [Source:HGNC Symbol;Acc:23639]	ortholog_one2one				4	4	4	4	3	YES	YES	4	4	3	3.9	3.9	176.02	1564	5	9	4	1.0687e-27	3.9	3.9	3	71933000	18667000	34565000	18701000	781880	202910	375710	203270
279	ENSMMUP00000001619	ENSMMUP00000001619	ENSMMUT00000001718	ENSMMUG00000001214	ENSMMUP00000001619|ENSMMUT00000001718|ENSMMUG00000001214|XM_001086837.1									2	2	2	2	2	YES	YES	2	2	2	3.8	3.8	55.671	473	5	4	5	4.4539e-07	3.8	3.8	3.8	63077000	23713000	20152000	19212000	2628200	988050	839680	800480
280	ENSMMUP00000001627	ENSMMUP00000001627	ENSMMUT00000001726	ENSMMUG00000001217	ENSMMUP00000001627|ENSMMUT00000001726|ENSMMUG00000001217|CASP7|caspase 7, apoptosis-related cysteine peptidase [Source:HGNC Symbol;Acc:1508]	ENSP00000358327	ENSG00000165806	CASP7	caspase 7, apoptosis-related cysteine peptidase [Source:HGNC Symbol;Acc:1508]	ortholog_one2one				2	2	2	1	1	YES	YES	2	1	1	9	9	30.242	267	3	2	3	7.6748e-07	9	3.7	3.7	8194100	4800800	1185200	2208100	482000	282400	69716	129890
283	ENSMMUP00000001662;ENSMMUP00000001663;ENSMMUP00000023055;ENSMMUP00000023058	ENSMMUP00000001662	ENSMMUT00000001764	ENSMMUG00000001244	ENSMMUP00000001662|ENSMMUT00000001764|ENSMMUG00000001244|EPB41L5|erythrocyte membrane protein band 4.1 like 5 [Source:HGNC Symbol;Acc:19819];	ENSP00000263713	ENSG00000115109	EPB41L5	erythrocyte membrane protein band 4.1 like 5 [Source:HGNC Symbol;Acc:19819]	ortholog_one2one				5	5	5	2	2	YES	YES	5	2	2	7.9	7.9	82.056	732	5	2	2	2.5044e-11	7.9	3.3	2.9	10128000	5703400	3030000	1394200	316490	178230	94688	43569
284	ENSMMUP00000001668	ENSMMUP00000001668	ENSMMUT00000001770	ENSMMUG00000001248	ENSMMUP00000001668|ENSMMUT00000001770|ENSMMUG00000001248|F13A1|coagulation factor XIII, A1 polypeptide [Source:HGNC Symbol;Acc:3531]	ENSP00000264870	ENSG00000124491	F13A1	coagulation factor XIII, A1 polypeptide [Source:HGNC Symbol;Acc:3531]	ortholog_one2one				9	9	8	8	7	YES	YES	8	8	7	18.4	18.4	83.283	732	17	17	16	8.1287e-91	16.8	14.8	16.4	354060000	122520000	122580000	108960000	8851400	3062900	3064400	2724100
286	ENSMMUP00000001688;ENSMMUP00000034130;ENSMMUP00000034128	ENSMMUP00000001688	ENSMMUT00000001791	ENSMMUG00000001266	ENSMMUP00000001688|ENSMMUT00000001791|ENSMMUG00000001266|COG1|component of oligomeric golgi complex 1 [Source:HGNC Symbol;Acc:6545];	ENSP00000299886	ENSG00000166685	COG1	component of oligomeric golgi complex 1 [Source:HGNC Symbol;Acc:6545]	ortholog_one2one				6	6	4	3	4	YES	YES	4	3	4	11	11	108.93	980	6	5	5	7.5786e-15	7.9	6.6	7.9	37868000	16129000	13056000	8683100	631130	268810	217600	144720
287	ENSMMUP00000001694;ENSMMUP00000001696;ENSMMUP00000001699;ENSMMUP00000001697;ENSMMUP00000001698;ENSMMUP00000040068	ENSMMUP00000001694	ENSMMUT00000001797	ENSMMUG00000001267	ENSMMUP00000001694|ENSMMUT00000001797|ENSMMUG00000001267|GTF3C5|general transcription factor IIIC, polypeptide 5, 63kDa [Source:HGNC Symbol;Acc:4668];	ENSP00000361180	ENSG00000148308	GTF3C5	general transcription factor IIIC, polypeptide 5, 63kDa [Source:HGNC Symbol;Acc:4668]	ortholog_one2one				4	4	3	2	3	YES	YES	3	2	3	10	10	60.548	529	6	3	6	1.0147e-45	8.5	5.1	8.1	41945000	21368000	4202200	16375000	1103800	562330	110580	430920
290	ENSMMUP00000001730	ENSMMUP00000001730	ENSMMUT00000001834	ENSMMUG00000001294	ENSMMUP00000001730|ENSMMUT00000001834|ENSMMUG00000001294|FCHSD2|FCH and double SH3 domains 2 [Source:HGNC Symbol;Acc:29114]	ENSP00000386722	ENSG00000137478	FCHSD2	FCH and double SH3 domains 2 [Source:HGNC Symbol;Acc:29114]	ortholog_one2one				2	2	1	1	2	YES	YES	1	1	2	6.9	6.9	77.753	684	1	1	3	3.4009e-05	2.8	2.8	6.9	2971500	606100	1375800	989620	69104	14095	31994	23014
291	ENSMMUP00000001740	ENSMMUP00000001740	ENSMMUT00000001845	ENSMMUG00000001305	ENSMMUP00000001740|ENSMMUT00000001845|ENSMMUG00000001305|TBCC|tubulin folding cofactor C [Source:HGNC Symbol;Acc:11580]	ENSP00000244625	ENSG00000124659	TBCC	tubulin folding cofactor C [Source:HGNC Symbol;Acc:11580]	ortholog_one2one				5	5	3	4	5	YES	YES	3	4	5	25.1	25.1	39.34	346	4	4	7	7.2538e-60	11.6	20.8	25.1	133290000	36890000	49498000	46904000	5331700	1475600	1979900	1876200
293	ENSMMUP00000001755	ENSMMUP00000001755	ENSMMUT00000001860	ENSMMUG00000001314	ENSMMUP00000001755|ENSMMUT00000001860|ENSMMUG00000001314|STK25|serine/threonine kinase 25 [Source:HGNC Symbol;Acc:11404]	ENSP00000325748	ENSG00000115694	STK25	serine/threonine kinase 25 [Source:HGNC Symbol;Acc:11404]	ortholog_one2one				5	0	5	4	4	YES	YES	0	0	0	12.9	0	47.766	427	5	2	5	4.8618e-138	12.9	12.6	12.6	20024000	8159500	4342600	7522300	741640	302200	160840	278600
294	ENSMMUP00000012025;ENSMMUP00000036125;ENSMMUP00000036121;ENSMMUP00000001756;ENSMMUP00000036122	ENSMMUP00000012025	ENSMMUT00000012827	ENSMMUG00000009173	ENSMMUP00000012025|ENSMMUT00000012827|ENSMMUG00000009173|STK24|serine/threonine kinase 24 [Source:HGNC Symbol;Acc:11403];	ENSP00000365730	ENSG00000102572	STK24	serine/threonine kinase 24 [Source:HGNC Symbol;Acc:11403]	ortholog_one2one	ENSMUSP00000032931	ENSMUSG00000030691	ortholog_one2one	8	3	7	6	6	YES	YES	2	2	2	22.8	11.5	49.261	443	22	16	16	2.2374e-185	19	18.3	18.7	329010000	129290000	115380000	84341000	15667000	6156600	5494400	4016200
295	ENSMMUP00000001760;ENSMMUP00000001759;ENSMMUP00000032870	ENSMMUP00000001760	ENSMMUT00000001865	ENSMMUG00000001319	ENSMMUP00000001760|ENSMMUT00000001865|ENSMMUG00000001319|MTHFD1;	ENSP00000450560	ENSG00000100714	MTHFD1	methylenetetrahydrofolate dehydrogenase (NADP+ dependent) 1, methenyltetrahydrofolate cyclohydrolase, formyltetrahydrofolate synthetase [Source:HGNC Symbol;Acc:7432]	ortholog_one2one				19	19	16	18	14	YES	YES	16	18	14	32.7	32.7	103.79	955	50	49	48	1.4361e-235	26.6	31	23	1252000000	419640000	450450000	381870000	21964000	7362000	7902700	6699400
296	ENSMMUP00000001781	ENSMMUP00000001781	ENSMMUT00000001886	ENSMMUG00000001332	ENSMMUP00000001781|ENSMMUT00000001886|ENSMMUG00000001332|UBE2L6|ubiquitin-conjugating enzyme E2L 6 [Source:HGNC Symbol;Acc:12490]	ENSP00000287156	ENSG00000156587	UBE2L6	ubiquitin-conjugating enzyme E2L 6 [Source:HGNC Symbol;Acc:12490]	ortholog_one2one				5	5	3	3	5	YES	YES	3	3	5	51.3	51.3	17.464	152	14	14	19	4.207e-200	29.6	29.6	51.3	407340000	127050000	177580000	102710000	50918000	15881000	22198000	12839000
297	ENSMMUP00000001789	ENSMMUP00000001789	ENSMMUT00000001895	ENSMMUG00000001339	ENSMMUP00000001789|ENSMMUT00000001895|ENSMMUG00000001339|CAND2|cullin-associated and neddylation-dissociated 2 (putative) [Source:HGNC Symbol;Acc:30689]	ENSP00000387641	ENSG00000144712	CAND2	cullin-associated and neddylation-dissociated 2 (putative) [Source:HGNC Symbol;Acc:30689]	ortholog_one2one				8	8	2	3	6	YES	YES	2	3	6	10.3	10.3	122.76	1119	3	6	10	1.079e-39	2.1	4	8	46285000	5017300	13960000	27307000	784490	85039	236610	462830
298	ENSMMUP00000001791;ENSMMUP00000001792	ENSMMUP00000001791	ENSMMUT00000001898	ENSMMUG00000001342	ENSMMUP00000001791|ENSMMUT00000001898|ENSMMUG00000001342|IQSEC1|IQ motif and Sec7 domain 1 [Source:HGNC Symbol;Acc:29112];	ENSP00000273221	ENSG00000144711	IQSEC1	IQ motif and Sec7 domain 1 [Source:HGNC Symbol;Acc:29112]	ortholog_one2one				2	2	2	2	1	YES	YES	2	2	1	3.9	3.9	108.36	963	4	5	3	8.7487e-50	3.9	3.9	2.2	52197000	14411000	26482000	11304000	869950	240190	441360	188400
299	ENSMMUP00000001803	ENSMMUP00000001803	ENSMMUT00000001910	ENSMMUG00000001348	ENSMMUP00000001803|ENSMMUT00000001910|ENSMMUG00000001348|ERBB2|v-erb-b2 erythroblastic leukemia viral oncogene homolog 2, neuro/glioblastoma derived oncogene homolog (avian) [Source:HGNC Symbol;Acc:3430]	ENSP00000269571	ENSG00000141736	ERBB2	v-erb-b2 erythroblastic leukemia viral oncogene homolog 2, neuro/glioblastoma derived oncogene homolog (avian) [Source:HGNC Symbol;Acc:3430]	apparent_ortholog_one2one				2	1	1	1	2	YES	YES	0	0	1	2.1	0.9	107.25	974	2	1	2	9.0161e-05	1.1	1.1	2.1	6720700	2926300	1996400	1798000	137160	59720	40743	36694
301	ENSMMUP00000001807	ENSMMUP00000001807	ENSMMUT00000001914	ENSMMUG00000001353	ENSMMUP00000001807|ENSMMUT00000001914|ENSMMUG00000001353|ACTBL2|actin, beta-like 2 [Source:HGNC Symbol;Acc:17780]	ENSP00000416706	ENSG00000169067	ACTBL2	actin, beta-like 2 [Source:HGNC Symbol;Acc:17780]	ortholog_one2one				8	1	8	8	6	YES	YES	1	1	1	26.9	4.8	41.966	376	13	12	11	1.3032e-214	26.9	26.9	23.7	22200000000	7643200000	9164000000	5393200000	925010000	318470000	381830000	224720000
302	ENSMMUP00000001808;ENSMMUP00000029092;ENSMMUP00000041322	ENSMMUP00000001808	ENSMMUT00000001915	ENSMMUG00000001354	ENSMMUP00000001808|ENSMMUT00000001915|ENSMMUG00000001354|XP_001108313.1;									3	3	3	3	3	YES	YES	3	3	3	14.5	14.5	27.29	249	10	10	9	3.0363e-115	14.5	14.5	14.5	236230000	73649000	98314000	64267000	15749000	4909900	6554300	4284500
303	ENSMMUP00000001814	ENSMMUP00000001814	ENSMMUT00000001923	ENSMMUG00000001360	ENSMMUP00000001814|ENSMMUT00000001923|ENSMMUG00000001360|B6EZN2_MACMU|Adaptor-related protein complex 3, beta 1 subunit Fragment [Source:UniProtKB/TrEMBL;Acc:B6EZN2]	ENSP00000255194	ENSG00000132842	AP3B1	adaptor-related protein complex 3, beta 1 subunit [Source:HGNC Symbol;Acc:566]	ortholog_one2one				10	9	8	8	6	YES	YES	7	7	5	12.1	10.9	117.74	1055	13	11	9	2.3583e-53	9	9.9	6.7	128630000	32378000	56826000	39429000	2074700	522220	916550	635950
304	ENSMMUP00000001816	ENSMMUP00000001816	ENSMMUT00000001925	ENSMMUG00000001361	ENSMMUP00000001816|ENSMMUT00000001925|ENSMMUG00000001361|IPO8|importin 8 [Source:HGNC Symbol;Acc:9853]	ENSP00000256079	ENSG00000133704	IPO8	importin 8 [Source:HGNC Symbol;Acc:9853]	ortholog_one2one				6	6	4	6	4	YES	YES	4	6	4	10.4	10.4	119.96	1037	6	11	6	1.0136e-78	7.8	10.4	7.8	95511000	28743000	40459000	26310000	1675600	504260	709800	461570
305	ENSMMUP00000001817;ENSMMUP00000033539;ENSMMUP00000001818	ENSMMUP00000001817	ENSMMUT00000001926	ENSMMUG00000001362	ENSMMUP00000001817|ENSMMUT00000001926|ENSMMUG00000001362|VPS13C|vacuolar protein sorting 13 homolog C (S. cerevisiae) [Source:HGNC Symbol;Acc:23594];	ENSP00000261517	ENSG00000129003	VPS13C	vacuolar protein sorting 13 homolog C (S. cerevisiae) [Source:HGNC Symbol;Acc:23594]	ortholog_one2one				25	25	20	13	16	YES	YES	20	13	16	10.7	10.7	422.61	3753	30	19	27	2.1953e-131	8.3	5.1	7.1	255350000	79414000	72765000	103170000	1140000	354530	324850	460580
306	ENSMMUP00000001827	ENSMMUP00000001827	ENSMMUT00000001939	ENSMMUG00000001372	ENSMMUP00000001827|ENSMMUT00000001939|ENSMMUG00000001372|ZNF622|zinc finger protein 622 [Source:HGNC Symbol;Acc:30958]	ENSP00000310042	ENSG00000173545	ZNF622	zinc finger protein 622 [Source:HGNC Symbol;Acc:30958]	ortholog_one2one				2	2	2	1	2	YES	YES	2	1	2	5	5	54.157	477	5	4	6	2.6839e-08	5	3.4	5	32752000	8138100	16543000	8070800	1169700	290650	590830	288240
307	ENSMMUP00000001834;ENSMMUP00000001835	ENSMMUP00000001834	ENSMMUT00000001947	ENSMMUG00000001376	ENSMMUP00000001834|ENSMMUT00000001947|ENSMMUG00000001376|YTHDC2|YTH domain containing 2 [Source:HGNC Symbol;Acc:24721];	ENSP00000161863	ENSG00000047188	YTHDC2	YTH domain containing 2 [Source:HGNC Symbol;Acc:24721]	ortholog_one2one				4	4	1	1	2	YES	YES	1	1	2	4.3	4.3	160.55	1432	2	2	2	2.7532e-21	0.6	1.3	2.3	6090300	1080000	3078600	1931800	66927	11868	33830	21228
308	ENSMMUP00000001839;ENSMMUP00000001836;ENSMMUP00000001841	ENSMMUP00000001839	ENSMMUT00000001952	ENSMMUG00000001374	ENSMMUP00000001839|ENSMMUT00000001952|ENSMMUG00000001374|LOC723178;	ENSP00000364547	ENSG00000197321	SVIL	supervillin [Source:HGNC Symbol;Acc:11480]	ortholog_one2one				9	9	8	5	4	YES	YES	8	5	4	5.9	5.9	247.19	2209	16	9	13	3.0706e-25	5.1	3.8	2.6	74634000	26748000	18760000	29126000	540830	193830	135940	211060
309	ENSMMUP00000001854;ENSMMUP00000001853;ENSMMUP00000024698	ENSMMUP00000001854	ENSMMUT00000001967	ENSMMUG00000001387	ENSMMUP00000001854|ENSMMUT00000001967|ENSMMUG00000001387|PAK1|p21 protein (Cdc42/Rac)-activated kinase 1 [Source:HGNC Symbol;Acc:8590];	ENSP00000278568	ENSG00000149269	PAK1	p21 protein (Cdc42/Rac)-activated kinase 1 [Source:HGNC Symbol;Acc:8590]	ortholog_one2one				5	3	4	5	4	YES	YES	2	3	2	14.4	8.1	61.997	555	4	6	3	3.8481e-127	11.4	14.4	12.3	49351000	13779000	20630000	14942000	1827800	510340	764060	553400
310	ENSMMUP00000001855	ENSMMUP00000001855	ENSMMUT00000001968	ENSMMUG00000001388	ENSMMUP00000001855|ENSMMUT00000001968|ENSMMUG00000001388|TNFAIP8L3|tumor necrosis factor, alpha-induced protein 8-like 3 [Source:HGNC Symbol;Acc:20620]	ENSP00000328016	ENSG00000183578	TNFAIP8L3	tumor necrosis factor, alpha-induced protein 8-like 3 [Source:HGNC Symbol;Acc:20620]	ortholog_one2one				2	2	1	1	2	YES	YES	1	1	2	9.9	9.9	32.772	292	8	4	7	7.8725e-54	6.8	6.8	9.9	159790000	67574000	33086000	59134000	9399700	3974900	1946300	3478500
311	ENSMMUP00000001857;ENSMMUP00000036193;ENSMMUP00000036192	ENSMMUP00000001857	ENSMMUT00000001970	ENSMMUG00000001390	ENSMMUP00000001857|ENSMMUT00000001970|ENSMMUG00000001390|NCK2;	ENSP00000233154	ENSG00000071051	NCK2	NCK adaptor protein 2 [Source:HGNC Symbol;Acc:7665]	ortholog_one2one				4	3	3	1	3	YES	YES	2	1	2	12.3	10.2	43.204	382	5	4	2	1.7249e-11	8.9	2.9	8.4	32321000	19501000	11425000	1396000	1346700	812520	476030	58168
313	ENSMMUP00000001860	ENSMMUP00000001860	ENSMMUT00000001973	ENSMMUG00000001393	ENSMMUP00000001860|ENSMMUT00000001973|ENSMMUG00000001393|GNMT|glycine N-methyltransferase [Source:HGNC Symbol;Acc:4415]	ENSP00000361894	ENSG00000124713	GNMT	glycine N-methyltransferase [Source:HGNC Symbol;Acc:4415]	ortholog_one2one				3	3	2	2	2	YES	YES	2	2	2	16.3	16.3	32.711	295	10	5	5	2.9308e-11	9.5	9.5	9.5	43054000	6798800	22809000	13447000	2391900	377710	1267200	747040
314	ENSMMUP00000001883	ENSMMUP00000001883	ENSMMUT00000001997	ENSMMUG00000001408	ENSMMUP00000001883|ENSMMUT00000001997|ENSMMUG00000001408									2	2	1	1	1	YES	YES	1	1	1	16.9	16.9	42.333	414	1	1	1	3.1324e-09	9.2	9.2	7.7	14795000	2163000	2930700	9701700	1056800	154500	209340	692980
315	ENSMMUP00000001887	ENSMMUP00000001887	ENSMMUT00000002001	ENSMMUG00000029176	ENSMMUP00000001887|ENSMMUT00000002001|ENSMMUG00000029176									4	4	4	3	4	YES	YES	4	3	4	25.1	25.1	23.742	211	9	7	8	2.2215e-127	25.1	20.9	25.1	65709000	20965000	30168000	14577000	5054600	1612700	2320600	1121300
316	ENSMMUP00000038007;ENSMMUP00000001889;ENSMMUP00000013110;ENSMMUP00000037003	ENSMMUP00000038007	ENSMMUT00000027159	ENSMMUG00000019335	ENSMMUP00000038007|ENSMMUT00000027159|ENSMMUG00000019335|XM_001106805.1;									2	2	2	2	1	YES	YES	2	2	1	10.4	10.4	45.965	403	5	3	2	1.5696e-08	10.4	10.4	5.5	68322000	32363000	22833000	13126000	2970500	1407100	992740	570690
318	ENSMMUP00000030483;ENSMMUP00000001914;ENSMMUP00000034730	ENSMMUP00000030483	ENSMMUT00000032576	ENSMMUG00000023157	ENSMMUP00000030483|ENSMMUT00000032576|ENSMMUG00000023157|SNX18|sorting nexin 18 [Source:HGNC Symbol;Acc:19245];	ENSP00000317332	ENSG00000178996	SNX18	sorting nexin 18 [Source:HGNC Symbol;Acc:19245]	ortholog_one2one	ENSMUSP00000082406	ENSMUSG00000034574	ortholog_one2one	10	10	8	7	10	YES	YES	8	7	10	19.6	19.6	69.086	624	39	28	30	1.9988e-113	16.8	13.8	19.6	396330000	199770000	100460000	96107000	14679000	7398800	3720600	3559500
319	ENSMMUP00000001926;ENSMMUP00000001935;ENSMMUP00000005840;ENSMMUP00000012596;ENSMMUP00000031247;ENSMMUP00000031248;ENSMMUP00000031273;ENSMMUP00000034283;ENSMMUP00000034308;ENSMMUP00000034312;ENSMMUP00000034321;ENSMMUP00000040172	ENSMMUP00000001926	ENSMMUT00000002041	ENSMMUG00000001440	ENSMMUP00000001926|ENSMMUT00000002041|ENSMMUG00000001440|Q6B821_MACMU|Histone H4 Fragment [Source:UniProtKB/TrEMBL;Acc:Q6B821];									7	7	7	7	6	YES	YES	7	7	6	42.7	42.7	11.367	103	105	84	71	3.2061e-173	42.7	42.7	31.1	8590900000	3892400000	3181800000	1516700000	1431800000	648740000	530290000	252780000
320	ENSMMUP00000001929	ENSMMUP00000001929	ENSMMUT00000002044	ENSMMUG00000001443	ENSMMUP00000001929|ENSMMUT00000002044|ENSMMUG00000001443|CMTM6|CKLF-like MARVEL transmembrane domain containing 6 [Source:HGNC Symbol;Acc:19177]	ENSP00000205636	ENSG00000091317	CMTM6	CKLF-like MARVEL transmembrane domain containing 6 [Source:HGNC Symbol;Acc:19177]	ortholog_one2one				2	2	1	1	2	YES	YES	1	1	2	16.4	16.4	20.328	183	5	3	6	5.4952e-09	6	6	16.4	66482000	28484000	17484000	20514000	9497500	4069200	2497800	2930500
321	ENSMMUP00000001933;ENSMMUP00000029040;ENSMMUP00000031251;ENSMMUP00000031276;ENSMMUP00000007537	ENSMMUP00000001933	ENSMMUT00000002048	ENSMMUG00000031509	ENSMMUP00000001933|ENSMMUT00000002048|ENSMMUG00000031509|HIST3H2A|histone cluster 3, H2a [Source:HGNC Symbol;Acc:20507];	ENSP00000355656	ENSG00000181218	HIST3H2A	histone cluster 3, H2a [Source:HGNC Symbol;Acc:20507]	apparent_ortholog_one2one				4	1	4	4	4	YES	YES	1	1	1	35.4	13.8	14.121	130	26	44	34	5.9463e-78	35.4	35.4	35.4	5491200000	1391500000	2541200000	1558500000	784450000	198780000	363020000	222650000
322	ENSMMUP00000001942	ENSMMUP00000001942	ENSMMUT00000002057	ENSMMUG00000001454	ENSMMUP00000001942|ENSMMUT00000002057|ENSMMUG00000001454|ACO2|aconitase 2, mitochondrial [Source:HGNC Symbol;Acc:118]	ENSP00000216254	ENSG00000100412	ACO2	aconitase 2, mitochondrial [Source:HGNC Symbol;Acc:118]	ortholog_one2one				30	30	26	25	28	YES	YES	26	25	28	52.2	52.2	85.346	780	135	127	140	0	46.7	43.5	50.5	8032300000	2978200000	2430200000	2623900000	191250000	70911000	57861000	62474000
323	ENSMMUP00000001943	ENSMMUP00000001943	ENSMMUT00000002058	ENSMMUG00000001458	ENSMMUP00000001943|ENSMMUT00000002058|ENSMMUG00000001458	ENSP00000389631	ENSG00000130429	ARPC1B	actin related protein 2/3 complex, subunit 1B, 41kDa [Source:HGNC Symbol;Acc:704]	ortholog_one2one				5	4	5	5	5	YES	YES	4	4	4	24.2	17.7	38.493	351	17	11	17	3.2902e-60	24.2	24.2	24.2	312600000	125160000	97740000	89696000	17367000	6953400	5430000	4983100
324	ENSMMUP00000001944	ENSMMUP00000001944	ENSMMUT00000002059	ENSMMUG00000001460	ENSMMUP00000001944|ENSMMUT00000002059|ENSMMUG00000001460|PDAP1|PDGFA associated protein 1 [Source:HGNC Symbol;Acc:14634]	ENSP00000222968	ENSG00000106244	PDAP1	PDGFA associated protein 1 [Source:HGNC Symbol;Acc:14634]	ortholog_one2one				3	3	2	3	3	YES	YES	2	3	3	16.6	16.6	20.66	181	8	6	6	4.1189e-31	16.6	16.6	16.6	134820000	53058000	50328000	31436000	13482000	5305800	5032800	3143600
326	ENSMMUP00000001955	ENSMMUP00000001955	ENSMMUT00000002071	ENSMMUG00000001467	ENSMMUP00000001955|ENSMMUT00000002071|ENSMMUG00000001467|Q9BDZ2_MACMU|Collagen type I alpha 1 Fragment [Source:UniProtKB/TrEMBL;Acc:Q9BDZ2]	ENSP00000225964	ENSG00000108821	COL1A1	collagen, type I, alpha 1 [Source:HGNC Symbol;Acc:2197]	ortholog_one2one				8	8	6	6	4	YES	YES	6	6	4	11.8	11.8	139.29	1460	20	13	13	1.9456e-63	8.6	8.5	6.7	3182900000	571410000	1107900000	1503500000	37891000	6802600	13189000	17899000
327	ENSMMUP00000001959	ENSMMUP00000001959	ENSMMUT00000002075	ENSMMUG00000001473	ENSMMUP00000001959|ENSMMUT00000002075|ENSMMUG00000001473|CNN1|calponin 1, basic, smooth muscle [Source:HGNC Symbol;Acc:2155]	ENSP00000252456	ENSG00000130176	CNN1	calponin 1, basic, smooth muscle [Source:HGNC Symbol;Acc:2155]	ortholog_one2one				2	2	1	2	1	YES	YES	1	2	1	10.3	10.3	31.709	291	1	2	1	8.2141e-44	6.9	10.3	6.9	110190000	20449000	53895000	35841000	6481500	1202900	3170300	2108300
329	ENSMMUP00000001968	ENSMMUP00000001968	ENSMMUT00000002085	ENSMMUG00000001479	ENSMMUP00000001968|ENSMMUT00000002085|ENSMMUG00000001479|LAMC2|laminin, gamma 2 [Source:HGNC Symbol;Acc:6493]	ENSP00000264144	ENSG00000058085	LAMC2	laminin, gamma 2 [Source:HGNC Symbol;Acc:6493]	ortholog_one2one				2	2	2	2	1	YES	YES	2	2	1	3.1	3.1	131.28	1193	3	4	3	3.7093e-14	3.1	3.1	1.5	29755000	11310000	16840000	1606100	402100	152830	227560	21704
331	ENSMMUP00000040841;ENSMMUP00000001976;ENSMMUP00000001978	ENSMMUP00000040841	ENSMMUT00000047815	ENSMMUG00000001484	ENSMMUP00000040841|ENSMMUT00000047815|ENSMMUG00000001484|LAMP2|lysosomal-associated membrane protein 2 [Source:HGNC Symbol;Acc:6501];	ENSP00000408411	ENSG00000005893	LAMP2	lysosomal-associated membrane protein 2 [Source:HGNC Symbol;Acc:6501]	ortholog_one2one				4	4	3	3	4	YES	YES	3	3	4	11.4	11.4	45.052	411	18	16	18	7.0175e-53	7.1	7.1	11.4	332690000	130980000	115920000	85795000	17510000	6893700	6100900	4515500
332	ENSMMUP00000001992;ENSMMUP00000001991	ENSMMUP00000001992	ENSMMUT00000002109	ENSMMUG00000001498	ENSMMUP00000001992|ENSMMUT00000002109|ENSMMUG00000001498|CDA|cytidine deaminase [Source:HGNC Symbol;Acc:1712];	ENSP00000364212	ENSG00000158825	CDA	cytidine deaminase [Source:HGNC Symbol;Acc:1712]	ortholog_one2one				3	3	2	3	3	YES	YES	2	3	3	40.4	40.4	16.099	146	12	8	12	5.8396e-32	15.1	40.4	40.4	496270000	202430000	149040000	144810000	70896000	28918000	21291000	20688000
333	ENSMMUP00000001995;ENSMMUP00000001994	ENSMMUP00000001995	ENSMMUT00000002112	ENSMMUG00000001500	ENSMMUP00000001995|ENSMMUT00000002112|ENSMMUG00000001500|KRT10|keratin 10 [Source:HGNC Symbol;Acc:6413];	ENSP00000269576	ENSG00000186395	KRT10	keratin 10 [Source:HGNC Symbol;Acc:6413]	ortholog_one2one				2	2	2	1	1	YES	YES	2	1	1	3.4	3.4	57.171	566	4	5	2	3.7966e-08	3.4	3.4	3.4	22917000	5344500	12075000	5496900	848770	197940	447240	203590
334	ENSMMUP00000002002;ENSMMUP00000002001;ENSMMUP00000002005	ENSMMUP00000002002	ENSMMUT00000002119	ENSMMUG00000001505	ENSMMUP00000002002|ENSMMUT00000002119|ENSMMUG00000001505|KRT23|keratin 23 (histone deacetylase inducible) [Source:HGNC Symbol;Acc:6438];	ENSP00000209718	ENSG00000108244	KRT23	keratin 23 (histone deacetylase inducible) [Source:HGNC Symbol;Acc:6438]	ortholog_one2one				2	2	2	2	1	YES	YES	2	2	1	5.9	5.9	48.09	422	4	3	3	1.3402e-05	5.9	5.9	2.4	99464000	25516000	69710000	4237700	3108200	797370	2178400	132430
335	ENSMMUP00000002007;ENSMMUP00000002006;ENSMMUP00000034091;ENSMMUP00000034090	ENSMMUP00000002007	ENSMMUT00000002124	ENSMMUG00000001507	ENSMMUP00000002007|ENSMMUT00000002124|ENSMMUG00000001507|BRD8|bromodomain containing 8 [Source:HGNC Symbol;Acc:19874];	ENSP00000254900	ENSG00000112983	BRD8	bromodomain containing 8 [Source:HGNC Symbol;Acc:19874]	ortholog_one2one				4	4	2	2	3	YES	YES	2	2	3	7.6	7.6	101.54	933	3	4	4	2.1788e-26	4.3	2.9	6.2	19956000	4876900	4041100	11038000	498910	121920	101030	275960
336	ENSMMUP00000002009;ENSMMUP00000039564;ENSMMUP00000039563	ENSMMUP00000002009	ENSMMUT00000002126	ENSMMUG00000001509	ENSMMUP00000002009|ENSMMUT00000002126|ENSMMUG00000001509|PSMD6|proteasome (prosome, macropain) 26S subunit, non-ATPase, 6 [Source:HGNC Symbol;Acc:9564];	ENSP00000295901	ENSG00000163636	PSMD6	proteasome (prosome, macropain) 26S subunit, non-ATPase, 6 [Source:HGNC Symbol;Acc:9564]	ortholog_one2one				8	8	6	8	8	YES	YES	6	8	8	27.2	27.2	45.559	389	24	24	26	2.9802e-53	19.8	27.2	27.2	390430000	144300000	127470000	118660000	13463000	4975700	4395400	4091800
337	ENSMMUP00000002014	ENSMMUP00000002014	ENSMMUT00000002132	ENSMMUG00000001515	ENSMMUP00000002014|ENSMMUT00000002132|ENSMMUG00000001515|CDC23|cell division cycle 23 homolog (S. cerevisiae) [Source:HGNC Symbol;Acc:1724]	ENSP00000378350	ENSG00000094880	CDC23	cell division cycle 23 [Source:HGNC Symbol;Acc:1724]	ortholog_one2one				7	7	1	5	3	YES	YES	1	5	3	15.1	15.1	68.26	591	1	6	3	7.1615e-28	2.4	11.2	6.4	18376000	2161300	8913200	7301700	525030	61751	254660	208620
338	ENSMMUP00000002036	ENSMMUP00000002036	ENSMMUT00000002156	ENSMMUG00000001526	ENSMMUP00000002036|ENSMMUT00000002156|ENSMMUG00000001526|TEX10|testis expressed 10 [Source:HGNC Symbol;Acc:25988]	ENSP00000364037	ENSG00000136891	TEX10	testis expressed 10 [Source:HGNC Symbol;Acc:25988]	ortholog_one2one				3	3	3	3	3	YES	YES	3	3	3	5	5	105.62	929	5	7	10	1.8333e-20	5	5	5	119830000	33921000	35705000	50200000	2349500	665120	700110	984310
339	ENSMMUP00000002040;ENSMMUP00000033783	ENSMMUP00000002040	ENSMMUT00000002160	ENSMMUG00000001532	ENSMMUP00000002040|ENSMMUT00000002160|ENSMMUG00000001532|Q3YAM5_MACMU|Calpain 3 Fragment [Source:UniProtKB/TrEMBL;Acc:Q3YAM5]	ENSP00000326227	ENSG00000214013	GANC	glucosidase, alpha; neutral C [Source:HGNC Symbol;Acc:4139]	ortholog_one2one				13	13	11	9	11	YES	YES	11	9	11	22.8	22.8	104.28	914	31	26	27	1.2235e-295	20	14.8	19.5	522190000	176690000	197880000	147620000	10239000	3464500	3880000	2894500
340	ENSMMUP00000037045;ENSMMUP00000002045	ENSMMUP00000037045	ENSMMUT00000044039	ENSMMUG00000001537	ENSMMUP00000037045|ENSMMUT00000044039|ENSMMUG00000001537|APOL2|apolipoprotein L, 2 [Source:HGNC Symbol;Acc:619];	ENSP00000249066	ENSG00000128335	APOL2	apolipoprotein L, 2 [Source:HGNC Symbol;Acc:619]	ortholog_one2one				3	3	3	3	3	YES	YES	3	3	3	12.8	12.8	40.251	366	12	12	11	0	12.8	12.8	12.8	292650000	87202000	116570000	88883000	14633000	4360100	5828400	4444100
342	ENSMMUP00000002055	ENSMMUP00000002055	ENSMMUT00000002175	ENSMMUG00000001539	ENSMMUP00000002055|ENSMMUT00000002175|ENSMMUG00000001539|C10orf76|UPF0668 protein C10orf76 [Source:UniProtKB/Swiss-Prot;Acc:Q5T2E6]	ENSP00000359050	ENSG00000120029	C10orf76	chromosome 10 open reading frame 76 [Source:HGNC Symbol;Acc:25788]	ortholog_one2one				3	3	2	2	1	YES	YES	2	2	1	7.5	7.5	78.979	690	2	2	1	1.4622e-08	6.2	3.3	2	6690200	4540200	1124900	1025100	191150	129720	32140	29288
343	ENSMMUP00000002060	ENSMMUP00000002060	ENSMMUT00000002181	ENSMMUG00000001543	ENSMMUP00000002060|ENSMMUT00000002181|ENSMMUG00000001543	ENSP00000326706	ENSG00000241839	PLEKHO2	pleckstrin homology domain containing, family O member 2 [Source:HGNC Symbol;Acc:30026]	ortholog_one2one				5	5	4	3	4	YES	YES	4	3	4	18.8	18.8	53.53	490	12	10	13	1.5169e-86	13.7	10.8	15.9	328000000	80718000	126110000	121160000	13666000	3363200	5254700	5048500
345	ENSMMUP00000002071;ENSMMUP00000002073	ENSMMUP00000002071	ENSMMUT00000002192	ENSMMUG00000001551	ENSMMUP00000002071|ENSMMUT00000002192|ENSMMUG00000001551|SSU72|SSU72 RNA polymerase II CTD phosphatase homolog (S. cerevisiae) [Source:HGNC Symbol;Acc:25016];	ENSP00000291386	ENSG00000160075	SSU72	SSU72 RNA polymerase II CTD phosphatase homolog (S. cerevisiae) [Source:HGNC Symbol;Acc:25016]	ortholog_one2one				2	2	1	2	1	YES	YES	1	2	1	14.4	14.4	22.574	194	1	2	1	6.1936e-07	8.2	14.4	8.2	12522000	2119500	7678800	2723600	1138400	192680	698070	247600
346	ENSMMUP00000002085	ENSMMUP00000002085	ENSMMUT00000002207	ENSMMUG00000001561	ENSMMUP00000002085|ENSMMUT00000002207|ENSMMUG00000001561|CFDP1|craniofacial development protein 1 [Source:HGNC Symbol;Acc:1873]	ENSP00000283882	ENSG00000153774	CFDP1	craniofacial development protein 1 [Source:HGNC Symbol;Acc:1873]	ortholog_one2one				7	7	5	6	6	YES	YES	5	6	6	23.7	23.7	33.574	299	17	15	13	2.9799e-154	16.7	23.7	16.7	304540000	109380000	100840000	94329000	19034000	6836100	6302300	5895600
347	ENSMMUP00000002088	ENSMMUP00000002088	ENSMMUT00000002210	ENSMMUG00000001564	ENSMMUP00000002088|ENSMMUT00000002210|ENSMMUG00000001564|TMEM231|transmembrane protein 231 [Source:HGNC Symbol;Acc:37234]									2	2	2	2	1	YES	YES	2	2	1	7.9	7.9	35.989	316	3	3	2	2.9815e-09	7.9	7.9	3.8	35877000	15780000	12375000	7722600	2110400	928250	727910	454270
349	ENSMMUP00000002100	ENSMMUP00000002100	ENSMMUT00000002223	ENSMMUG00000001571	ENSMMUP00000002100|ENSMMUT00000002223|ENSMMUG00000001571|XM_001095373.1									8	5	8	7	7	YES	YES	5	4	4	63.8	36.8	21.214	185	25	25	19	5.6222e-64	63.8	63.2	63.2	796630000	296200000	311800000	188630000	66386000	24683000	25983000	15719000
351	ENSMMUP00000036731;ENSMMUP00000002105;ENSMMUP00000036729	ENSMMUP00000036731	ENSMMUT00000043742	ENSMMUG00000001575	ENSMMUP00000036731|ENSMMUT00000043742|ENSMMUG00000001575|WDR35|WD repeat domain 35 [Source:HGNC Symbol;Acc:29250];	ENSP00000314444	ENSG00000118965	WDR35	WD repeat domain 35 [Source:HGNC Symbol;Acc:29250]	ortholog_one2one				5	5	3	1	3	YES	YES	3	1	3	6.6	6.6	133.54	1181	3	1	3	3.728e-19	3.9	1.1	3.6	8177800	2794500	213990	5169400	110510	37763	2891.7	69856
353	ENSMMUP00000033915;ENSMMUP00000002117	ENSMMUP00000033915	ENSMMUT00000040886	ENSMMUG00000001586	ENSMMUP00000033915|ENSMMUT00000040886|ENSMMUG00000001586|NPLOC4|nuclear protein localization 4 homolog (S. cerevisiae) [Source:HGNC Symbol;Acc:18261];	ENSP00000331487	ENSG00000182446	NPLOC4	nuclear protein localization 4 homolog (S. cerevisiae) [Source:HGNC Symbol;Acc:18261]	ortholog_one2one	ENSMUSP00000037385	ENSMUSG00000057722	ortholog_one2one	3	3	3	2	2	YES	YES	3	2	2	19	19	27.498	242	6	6	6	6.8975e-88	19	13.2	13.2	105760000	40769000	40517000	24473000	11751000	4529900	4501900	2719200
354	ENSMMUP00000002121;ENSMMUP00000001059;ENSMMUP00000002122;ENSMMUP00000002123;ENSMMUP00000002125;ENSMMUP00000033526;ENSMMUP00000002124	ENSMMUP00000002121	ENSMMUT00000002245	ENSMMUG00000001587	ENSMMUP00000002121|ENSMMUT00000002245|ENSMMUG00000001587|TPM1|tropomyosin 1 (alpha) [Source:HGNC Symbol;Acc:12010];	ENSP00000351022	ENSG00000140416	TPM1	tropomyosin 1 (alpha) [Source:HGNC Symbol;Acc:12010]	ortholog_one2one				15	8	13	13	8	YES	YES	7	7	4	41.4	24.2	37.424	326	51	59	32	3.0343e-154	38.3	35.9	26.4	1979200000	906230000	568420000	504570000	73304000	33564000	21053000	18688000
356	ENSMMUP00000002131;ENSMMUP00000039929	ENSMMUP00000002131	ENSMMUT00000002255	ENSMMUG00000001596	ENSMMUP00000002131|ENSMMUT00000002255|ENSMMUG00000001596|GTF2E1|general transcription factor IIE, polypeptide 1, alpha 56kDa [Source:HGNC Symbol;Acc:4650];	ENSP00000283875	ENSG00000153767	GTF2E1	general transcription factor IIE, polypeptide 1, alpha 56kDa [Source:HGNC Symbol;Acc:4650]	ortholog_one2one				2	2	1	2	1	YES	YES	1	2	1	5.5	5.5	49.515	439	3	4	2	3.9705e-33	3	5.5	3	51009000	17806000	18807000	14396000	1961900	684850	723340	553710
357	ENSMMUP00000002145	ENSMMUP00000002145	ENSMMUT00000002269	ENSMMUG00000001604	ENSMMUP00000002145|ENSMMUT00000002269|ENSMMUG00000001604|GPX8|glutathione peroxidase 8 (putative) [Source:HGNC Symbol;Acc:33100]	ENSP00000423822	ENSG00000164294	GPX8	glutathione peroxidase 8 (putative) [Source:HGNC Symbol;Acc:33100]	ortholog_one2one				2	2	1	2	1	YES	YES	1	2	1	14.4	14.4	23.941	209	4	5	3	9.1479e-07	9.6	14.4	9.6	28716000	7786900	17740000	3189200	2051200	556210	1267200	227800
358	ENSMMUP00000002155;ENSMMUP00000002154	ENSMMUP00000002155	ENSMMUT00000002279	ENSMMUG00000001613	ENSMMUP00000002155|ENSMMUT00000002279|ENSMMUG00000001613|TXNL4A|thioredoxin-like 4A [Source:HGNC Symbol;Acc:30551];	ENSP00000269601	ENSG00000141759	TXNL4A	thioredoxin-like 4A [Source:HGNC Symbol;Acc:30551]	ortholog_one2one				2	2	2	2	2	YES	YES	2	2	2	30.3	30.3	16.786	142	3	3	2	2.1584e-41	30.3	30.3	30.3	119110000	28833000	44919000	45358000	13234000	3203600	4991000	5039800
359	ENSMMUP00000002161;ENSMMUP00000012414;ENSMMUP00000012413	ENSMMUP00000002161	ENSMMUT00000002285	ENSMMUG00000001614	ENSMMUP00000002161|ENSMMUT00000002285|ENSMMUG00000001614|XM_001088349.1;									6	6	5	5	6	YES	YES	5	5	6	28.2	28.2	31.498	280	26	28	24	8.5057e-64	20.7	20.7	28.2	1066000000	410910000	445750000	209370000	48456000	18678000	20261000	9517000
360	ENSMMUP00000002169;ENSMMUP00000002170	ENSMMUP00000002169	ENSMMUT00000002293	ENSMMUG00000001616	ENSMMUP00000002169|ENSMMUT00000002293|ENSMMUG00000001616|PADI2|peptidyl arginine deiminase, type II [Source:HGNC Symbol;Acc:18341]	ENSP00000364635	ENSG00000117115	PADI2	peptidyl arginine deiminase, type II [Source:HGNC Symbol;Acc:18341]	ortholog_one2one				7	6	5	4	5	YES	YES	5	3	5	14.1	13.2	75.639	665	6	6	9	2.4248e-55	11.1	8.1	11.4	92540000	21539000	35093000	35907000	2570500	598310	974810	997420
363	ENSMMUP00000002186;ENSMMUP00000031883	ENSMMUP00000002186	ENSMMUT00000002313	ENSMMUG00000001633	ENSMMUP00000002186|ENSMMUT00000002313|ENSMMUG00000001633|GSDMD|gasdermin D [Source:HGNC Symbol;Acc:25697];	ENSP00000433209	ENSG00000104518	GSDMD	gasdermin D [Source:HGNC Symbol;Acc:25697]	ortholog_one2one				3	3	2	2	3	YES	YES	2	2	3	8.5	8.5	52.832	482	2	3	3	6.8556e-26	4.6	4.6	8.5	19567000	8019900	8404200	3143300	889430	364540	382010	142880
364	ENSMMUP00000002187	ENSMMUP00000002187	ENSMMUT00000002316	ENSMMUG00000001638	ENSMMUP00000002187|ENSMMUT00000002316|ENSMMUG00000001638|GLO1|glyoxalase I [Source:HGNC Symbol;Acc:4323]	ENSP00000362463	ENSG00000124767	GLO1	glyoxalase I [Source:HGNC Symbol;Acc:4323]	ortholog_one2one				10	10	10	10	9	YES	YES	10	10	9	56	56	20.709	184	57	54	57	1.7806e-284	56	56	51.1	7164100000	2642100000	2682700000	1839300000	651280000	240190000	243880000	167210000
365	ENSMMUP00000002190	ENSMMUP00000002190	ENSMMUT00000002319	ENSMMUG00000001642	ENSMMUP00000002190|ENSMMUT00000002319|ENSMMUG00000001642|MNAT1|menage a trois homolog 1, cyclin H assembly factor (Xenopus laevis) [Source:HGNC Symbol;Acc:7181]	ENSP00000261245	ENSG00000020426	MNAT1	menage a trois homolog 1, cyclin H assembly factor (Xenopus laevis) [Source:HGNC Symbol;Acc:7181]	ortholog_one2one				2	2	2	1	1	YES	YES	2	1	1	13.6	13.6	35.823	309	3	3	2	4.3818e-15	13.6	4.5	4.5	15380000	8030400	5045100	2304200	854430	446130	280280	128010
366	ENSMMUP00000002192	ENSMMUP00000002192	ENSMMUT00000002321	ENSMMUG00000001641	ENSMMUP00000002192|ENSMMUT00000002321|ENSMMUG00000001641|NAPRT1|nicotinate phosphoribosyltransferase domain containing 1 [Source:HGNC Symbol;Acc:30450]	ENSP00000401508	ENSG00000147813	NAPRT1	nicotinate phosphoribosyltransferase domain containing 1 [Source:HGNC Symbol;Acc:30450]	ortholog_one2one				7	7	6	7	6	YES	YES	6	7	6	19.2	19.2	57.621	548	15	15	12	3.3239e-162	13.9	19.2	13.9	345970000	89943000	161990000	94046000	23065000	5996200	10799000	6269700
367	ENSMMUP00000002196;ENSMMUP00000002197;ENSMMUP00000002195;ENSMMUP00000027267	ENSMMUP00000002196	ENSMMUT00000002325	ENSMMUG00000001645	ENSMMUP00000002196|ENSMMUT00000002325|ENSMMUG00000001645;									5	5	4	5	3	YES	YES	4	5	3	19.9	19.9	34.436	311	12	12	8	8.8927e-54	17	19.9	15.8	480910000	210870000	185370000	84666000	20909000	9168200	8059600	3681100
368	ENSMMUP00000002223	ENSMMUP00000002223	ENSMMUT00000002352	ENSMMUG00000001657	ENSMMUP00000002223|ENSMMUT00000002352|ENSMMUG00000001657|RNAS6_MACMU|Ribonuclease K6 Precursor (RNase K6)(EC 3.1.27.-) [Source:UniProtKB/Swiss-Prot;Acc:O46533]	ENSP00000302046	ENSG00000169413	RNASE6	ribonuclease, RNase A family, k6 [Source:HGNC Symbol;Acc:10048]	ortholog_one2one				2	2	2	1	1	YES	YES	2	1	1	18.7	18.7	17.246	150	6	2	3	4.2616e-15	18.7	12	12	125910000	42458000	31354000	52099000	12591000	4245800	3135400	5209900
369	ENSMMUP00000002250;ENSMMUP00000037116	ENSMMUP00000002250	ENSMMUT00000002379	ENSMMUG00000001675	ENSMMUP00000002250|ENSMMUT00000002379|ENSMMUG00000001675|LOC715117;	ENSP00000380877	ENSG00000100325	ASCC2	activating signal cointegrator 1 complex subunit 2 [Source:HGNC Symbol;Acc:24103]	ortholog_one2one				5	5	2	3	4	YES	YES	2	3	4	7.6	7.6	85.688	752	5	5	8	4.7787e-16	2.8	5.2	7.4	26671000	6085600	8452400	12133000	833460	190170	264140	379150
370	ENSMMUP00000002254;ENSMMUP00000033719;ENSMMUP00000033720	ENSMMUP00000002254	ENSMMUT00000002383	ENSMMUG00000001682	ENSMMUP00000002254|ENSMMUT00000002383|ENSMMUG00000001682|Q3YAI7_MACMU|Glucose regulated protein, 58kDa Fragment [Source:UniProtKB/TrEMBL;Acc:Q3YAI7];	ENSP00000300289	ENSG00000167004	PDIA3	protein disulfide isomerase family A, member 3 [Source:HGNC Symbol;Acc:4606]	ortholog_one2one				20	20	20	18	18	YES	YES	20	18	18	43.6	43.6	56.779	505	135	139	129	0	43.6	37.4	38.4	20318000000	7094500000	7399500000	5823500000	580500000	202700000	211420000	166390000
372	ENSMMUP00000002262	ENSMMUP00000002262	ENSMMUT00000002391	ENSMMUG00000001690	ENSMMUP00000002262|ENSMMUT00000002391|ENSMMUG00000001690|CNN3|calponin 3, acidic [Source:HGNC Symbol;Acc:2157]	ENSP00000359225	ENSG00000117519	CNN3	calponin 3, acidic [Source:HGNC Symbol;Acc:2157]	ortholog_one2one				8	8	6	7	7	YES	YES	6	7	7	36.5	36.5	36.417	329	20	24	26	1.0134e-172	24.6	36.5	34	1284100000	353260000	548260000	382590000	67585000	18593000	28856000	20136000
373	ENSMMUP00000002263	ENSMMUP00000002263	ENSMMUT00000002392	ENSMMUG00000001689	ENSMMUP00000002263|ENSMMUT00000002392|ENSMMUG00000001689|SH3BGRL|SH3 domain binding glutamic acid-rich protein like [Source:HGNC Symbol;Acc:10823]	ENSP00000362308	ENSG00000131171	SH3BGRL	SH3 domain binding glutamic acid-rich protein like [Source:HGNC Symbol;Acc:10823]	ortholog_one2one				6	6	6	6	6	YES	YES	6	6	6	67.7	67.7	11.25	99	31	33	31	6.5268e-84	67.7	67.7	67.7	1948200000	545030000	823130000	580030000	243520000	68128000	102890000	72504000
375	ENSMMUP00000002273	ENSMMUP00000002273	ENSMMUT00000002403	ENSMMUG00000001700	ENSMMUP00000002273|ENSMMUT00000002403|ENSMMUG00000001700|STAM|signal transducing adaptor molecule (SH3 domain and ITAM motif) 1 [Source:HGNC Symbol;Acc:11357]	ENSP00000366746	ENSG00000136738	STAM	signal transducing adaptor molecule (SH3 domain and ITAM motif) 1 [Source:HGNC Symbol;Acc:11357]	ortholog_one2one				4	4	4	3	3	YES	YES	4	3	3	13.9	13.9	54.544	498	7	4	8	6.9594e-76	13.9	11.4	11.4	122580000	39273000	31877000	51435000	6451800	2067000	1677700	2707100
377	ENSMMUP00000002280	ENSMMUP00000002280	ENSMMUT00000002410	ENSMMUG00000001705	ENSMMUP00000002280|ENSMMUT00000002410|ENSMMUG00000001705|A2D660_MACMU|SALF Fragment [Source:UniProtKB/TrEMBL;Acc:A2D660]									4	4	2	3	1	YES	YES	2	3	1	9.2	9.2	82.336	731	2	4	1	4.6884e-17	3.8	7.7	2.3	22900000	4199400	15375000	3325800	636110	116650	427070	92384
378	ENSMMUP00000002283	ENSMMUP00000002283	ENSMMUT00000002415	ENSMMUG00000001711	ENSMMUP00000002283|ENSMMUT00000002415|ENSMMUG00000001711|SODC_MACMU|Superoxide dismutase [Cu-Zn] (EC 1.15.1.1) [Source:UniProtKB/Swiss-Prot;Acc:Q8HXQ0]	ENSP00000270142	ENSG00000142168	SOD1	superoxide dismutase 1, soluble [Source:HGNC Symbol;Acc:11179]	ortholog_one2one				7	7	7	4	3	YES	YES	7	4	3	68.2	68.2	15.983	154	36	27	23	7.6321e-171	68.2	50.6	46.8	11314000000	3583800000	4800100000	2929900000	1028500000	325800000	436370000	266360000
379	ENSMMUP00000002284	ENSMMUP00000002284	ENSMMUT00000002416	ENSMMUG00000001712	ENSMMUP00000002284|ENSMMUT00000002416|ENSMMUG00000001712|SFRS15|splicing factor, arginine/serine-rich 15 [Source:HGNC Symbol;Acc:19304]	ENSP00000286835	ENSG00000156304	SCAF4	SR-related CTD-associated factor 4 [Source:HGNC Symbol;Acc:19304]	ortholog_one2one				2	1	2	2	2	YES	YES	1	1	1	3.2	2.2	124.96	1143	4	3	4	1.1783e-14	3.2	3.2	3.2	90738000	20744000	40261000	29733000	2452400	560660	1088100	803580
380	ENSMMUP00000002293	ENSMMUP00000002293	ENSMMUT00000002425	ENSMMUG00000001720	ENSMMUP00000002293|ENSMMUT00000002425|ENSMMUG00000001720|TMEM160|transmembrane protein 160 [Source:HGNC Symbol;Acc:26042]	ENSP00000253047	ENSG00000130748	TMEM160	transmembrane protein 160 [Source:HGNC Symbol;Acc:26042]	ortholog_one2one				2	2	2	1	2	YES	YES	2	1	2	6.4	6.4	19.745	188	6	2	6	3.0303e-29	6.4	5.9	6.4	9986800	3509400	850830	5626600	1248400	438680	106350	703320
381	ENSMMUP00000002298;ENSMMUP00000034334	ENSMMUP00000002298	ENSMMUT00000002430	ENSMMUG00000001722	ENSMMUP00000002298|ENSMMUT00000002430|ENSMMUG00000001722|LOC697127;	ENSP00000379294	ENSG00000113391	FAM172A	family with sequence similarity 172, member A [Source:HGNC Symbol;Acc:25365]	ortholog_one2one				4	4	3	3	2	YES	YES	3	3	2	13.7	13.7	47.998	416	7	5	5	4.3572e-34	13.7	10.1	10.1	175100000	72060000	45502000	57539000	8755100	3603000	2275100	2877000
382	ENSMMUP00000002308;ENSMMUP00000010941;ENSMMUP00000035034;ENSMMUP00000002307	ENSMMUP00000002308	ENSMMUT00000002440	ENSMMUG00000001728	ENSMMUP00000002308|ENSMMUT00000002440|ENSMMUG00000001728|MAPK9|mitogen-activated protein kinase 9 [Source:HGNC Symbol;Acc:6886]	ENSP00000394560	ENSG00000050748	MAPK9	mitogen-activated protein kinase 9 [Source:HGNC Symbol;Acc:6886]	ortholog_one2one				4	4	4	3	3	YES	YES	4	3	3	16.5	16.5	48.332	424	11	8	12	2.2804e-88	16.5	13.4	13.4	202360000	52374000	72689000	77294000	8798100	2277100	3160400	3360600
383	ENSMMUP00000002322;ENSMMUP00000030965	ENSMMUP00000002322	ENSMMUT00000002456	ENSMMUG00000001739	ENSMMUP00000002322|ENSMMUT00000002456|ENSMMUG00000001739|ATP2A2|ATPase, Ca++ transporting, cardiac muscle, slow twitch 2 [Source:HGNC Symbol;Acc:812]	ENSP00000440045	ENSG00000174437	ATP2A2	ATPase, Ca++ transporting, cardiac muscle, slow twitch 2 [Source:HGNC Symbol;Acc:812]	ortholog_one2one				14	13	11	10	9	YES	YES	10	10	9	21.1	19.6	111.27	1000	25	26	31	2.6771e-201	15.6	16.2	13.9	584400000	170550000	238260000	175600000	11459000	3344100	4671700	3443100
385	ENSMMUP00000002330	ENSMMUP00000002330	ENSMMUT00000002464	ENSMMUG00000001742	ENSMMUP00000002330|ENSMMUT00000002464|ENSMMUG00000001742|TGFBR3|transforming growth factor, beta receptor III [Source:HGNC Symbol;Acc:11774]	ENSP00000212355	ENSG00000069702	TGFBR3	transforming growth factor, beta receptor III [Source:HGNC Symbol;Acc:11774]	ortholog_one2one				3	3	2	3	3	YES	YES	2	3	3	5	5	94.594	860	8	9	9	6.9196e-107	3.4	5	5	43271000	11054000	18934000	13283000	1311200	334980	573750	402520
387	ENSMMUP00000002332;ENSMMUP00000037271	ENSMMUP00000002332	ENSMMUT00000002466	ENSMMUG00000001745	ENSMMUP00000002332|ENSMMUT00000002466|ENSMMUG00000001745|OSBP|oxysterol binding protein [Source:HGNC Symbol;Acc:8503];	ENSP00000263847	ENSG00000110048	OSBP	oxysterol binding protein [Source:HGNC Symbol;Acc:8503]	ortholog_one2one				11	10	8	9	10	YES	YES	7	8	9	16.6	14.7	89.224	805	25	23	25	5.7804e-111	13.5	15.5	14.7	303050000	127290000	105320000	70439000	6313500	2651800	2194200	1467500
388	ENSMMUP00000002336;ENSMMUP00000002337	ENSMMUP00000002336	ENSMMUT00000002471	ENSMMUG00000001748	ENSMMUP00000002336|ENSMMUT00000002471|ENSMMUG00000001748|SYK|spleen tyrosine kinase [Source:HGNC Symbol;Acc:11491];	ENSP00000364907	ENSG00000165025	SYK	spleen tyrosine kinase [Source:HGNC Symbol;Acc:11491]	ortholog_one2one				7	7	7	7	5	YES	YES	7	7	5	19.4	19.4	72.087	635	14	9	14	1.2625e-73	19.4	19.4	15.6	173980000	78949000	43460000	51569000	3954000	1794300	987720	1172000
389	ENSMMUP00000002341;ENSMMUP00000002340	ENSMMUP00000002341	ENSMMUT00000002476	ENSMMUG00000001753	ENSMMUP00000002341|ENSMMUT00000002476|ENSMMUG00000001753|ITGA1|integrin, alpha 1 [Source:HGNC Symbol;Acc:6134];	ENSP00000282588	ENSG00000213949	ITGA1	integrin, alpha 1 [Source:HGNC Symbol;Acc:6134]	ortholog_one2one				8	8	6	6	7	YES	YES	6	6	7	13.3	13.3	130.95	1179	13	15	19	4.3878e-168	9.8	9.5	12.4	221740000	69697000	75300000	76740000	3519600	1106300	1195200	1218100
390	ENSMMUP00000002343	ENSMMUP00000002343	ENSMMUT00000002479	ENSMMUG00000001753	ENSMMUP00000002343|ENSMMUT00000002479|ENSMMUG00000001753|ITGA1|integrin, alpha 1 [Source:HGNC Symbol;Acc:6134]	ENSP00000282588	ENSG00000213949	ITGA1	integrin, alpha 1 [Source:HGNC Symbol;Acc:6134]	ortholog_one2one				2	2	2	2	2	YES	YES	2	2	2	12.5	12.5	43.435	385	3	8	4	2.8909e-66	12.5	12.5	12.5	50321000	9337700	25957000	15026000	1935400	359140	998350	577930
391	ENSMMUP00000033886;ENSMMUP00000002346;ENSMMUP00000006638	ENSMMUP00000033886	ENSMMUT00000040858	ENSMMUG00000001758	ENSMMUP00000033886|ENSMMUT00000040858|ENSMMUG00000001758|Q3YAQ7_MACMU|Casein kinase 1, alpha 1 Fragment [Source:UniProtKB/TrEMBL;Acc:Q3YAQ7];	ENSP00000421689	ENSG00000113712	CSNK1A1	casein kinase 1, alpha 1 [Source:HGNC Symbol;Acc:2451]	ortholog_one2one	ENSMUSP00000110342	ENSMUSG00000022708	ortholog_one2one	4	4	4	3	3	YES	YES	4	3	3	10.7	10.7	41.79	364	4	3	5	1.3195e-25	10.7	7.1	7.1	12964000	4398700	4282000	4283400	589280	199940	194630	194700
392	ENSMMUP00000002350;ENSMMUP00000016560	ENSMMUP00000002350	ENSMMUT00000002486	ENSMMUG00000001763	ENSMMUP00000002350|ENSMMUT00000002486|ENSMMUG00000001763|NCAPH2|non-SMC condensin II complex, subunit H2 [Source:HGNC Symbol;Acc:25071];	ENSP00000299821	ENSG00000025770	NCAPH2	non-SMC condensin II complex, subunit H2 [Source:HGNC Symbol;Acc:25071]	ortholog_one2one				2	2	1	2	2	YES	YES	1	2	2	5.8	5.8	68.162	607	1	2	3	3.697e-08	3.1	5.8	5.8	12513000	2980400	5233700	4299300	446910	106440	186920	153540
393	ENSMMUP00000002352;ENSMMUP00000002353	ENSMMUP00000002352	ENSMMUT00000002488	ENSMMUG00000001765	ENSMMUP00000002352|ENSMMUT00000002488|ENSMMUG00000001765|LOC716161;	ENSP00000379038	ENSG00000025708	TYMP	thymidine phosphorylase [Source:HGNC Symbol;Acc:3148]	ortholog_one2one				4	4	3	3	2	YES	YES	3	3	2	18.3	18.3	49.908	482	7	10	7	4.6028e-76	14.3	14.5	10.6	133260000	24174000	88758000	20332000	5330600	966980	3550300	813290
394	ENSMMUP00000002359;ENSMMUP00000037979;ENSMMUP00000002358;ENSMMUP00000037974;ENSMMUP00000037973	ENSMMUP00000002359	ENSMMUT00000002496	ENSMMUG00000001761	ENSMMUP00000002359|ENSMMUT00000002496|ENSMMUG00000001761|MYO1B|myosin IB [Source:HGNC Symbol;Acc:7596];	ENSP00000376132	ENSG00000128641	MYO1B	myosin IB [Source:HGNC Symbol;Acc:7596]	ortholog_one2one				9	9	7	8	5	YES	YES	7	8	5	12.3	12.3	131.84	1135	12	16	8	7.2094e-70	9.7	11.6	7.5	174930000	68855000	66942000	39129000	2498900	983640	956320	558980
397	ENSMMUP00000002371;ENSMMUP00000019343	ENSMMUP00000002371	ENSMMUT00000002508	ENSMMUG00000001780	ENSMMUP00000002371|ENSMMUT00000002508|ENSMMUG00000001780|CPT1A|carnitine palmitoyltransferase 1A (liver) [Source:HGNC Symbol;Acc:2328];	ENSP00000265641	ENSG00000110090	CPT1A	carnitine palmitoyltransferase 1A (liver) [Source:HGNC Symbol;Acc:2328]	ortholog_one2one				6	6	4	6	5	YES	YES	4	6	5	10.1	10.1	88.384	773	11	11	10	2.0186e-21	6.9	10.1	8.2	96995000	40706000	30406000	25883000	2309400	969180	723960	616260
398	ENSMMUP00000002376	ENSMMUP00000002376	ENSMMUT00000002513	ENSMMUG00000001785	ENSMMUP00000002376|ENSMMUT00000002513|ENSMMUG00000001785|THG1L|tRNA-histidine guanylyltransferase 1-like (S. cerevisiae) [Source:HGNC Symbol;Acc:26053]	ENSP00000231198	ENSG00000113272	THG1L	tRNA-histidine guanylyltransferase 1-like (S. cerevisiae) [Source:HGNC Symbol;Acc:26053]	ortholog_one2one				2	2	2	1	1	YES	YES	2	1	1	11.4	11.4	34.799	298	3	1	1	5.2614e-06	11.4	5.7	5.7	9763500	3641600	3433600	2688300	574320	214210	201970	158140
399	ENSMMUP00000002381	ENSMMUP00000002381	ENSMMUT00000002518	ENSMMUG00000001791	ENSMMUP00000002381|ENSMMUT00000002518|ENSMMUG00000001791|GRWD1|glutamate-rich WD repeat containing 1 [Source:HGNC Symbol;Acc:21270]	ENSP00000253237	ENSG00000105447	GRWD1	glutamate-rich WD repeat containing 1 [Source:HGNC Symbol;Acc:21270]	ortholog_one2one				5	5	4	5	4	YES	YES	4	5	4	17.7	17.7	49.423	446	13	11	8	1.5101e-35	17.7	17.7	14.1	64300000	22207000	24604000	17488000	3061900	1057500	1171600	832780
400	ENSMMUP00000002388;ENSMMUP00000002387;ENSMMUP00000002389;ENSMMUP00000034037	ENSMMUP00000002388	ENSMMUT00000002525	ENSMMUG00000001795	ENSMMUP00000002388|ENSMMUT00000002525|ENSMMUG00000001795|SRP68|signal recognition particle 68kDa [Source:HGNC Symbol;Acc:11302];	ENSP00000312066	ENSG00000167881	SRP68	signal recognition particle 68kDa [Source:HGNC Symbol;Acc:11302]	ortholog_one2one				6	6	6	5	5	YES	YES	6	5	5	16.6	16.6	70.419	622	9	10	8	5.4932e-39	16.6	14.1	14.1	209350000	66839000	82383000	60126000	4984500	1591400	1961500	1431600
401	ENSMMUP00000002391	ENSMMUP00000002391	ENSMMUT00000002528	ENSMMUG00000001798	ENSMMUP00000002391|ENSMMUT00000002528|ENSMMUG00000001798|XM_001095709.1									8	8	7	8	7	YES	YES	7	8	7	48.3	48.3	23.52	207	34	30	31	0	48.3	48.3	43.5	3175100000	1161500000	1201400000	812270000	186770000	68321000	70668000	47780000
402	ENSMMUP00000002392	ENSMMUP00000002392	ENSMMUT00000002529	ENSMMUG00000001799	ENSMMUP00000002392|ENSMMUT00000002529|ENSMMUG00000001799|CCM2|cerebral cavernous malformation 2 [Source:HGNC Symbol;Acc:21708]	ENSP00000370503	ENSG00000136280	CCM2	cerebral cavernous malformation 2 [Source:HGNC Symbol;Acc:21708]	ortholog_one2one				4	4	4	1	1	YES	YES	4	1	1	12.2	12.2	51.689	467	6	2	3	9.0048e-12	12.2	3.6	3.6	29988000	16421000	7756900	5809500	1071000	586470	277030	207480
403	ENSMMUP00000002393	ENSMMUP00000002393	ENSMMUT00000002530	ENSMMUG00000001800	ENSMMUP00000002393|ENSMMUT00000002530|ENSMMUG00000001800|CUL5|cullin 5 [Source:HGNC Symbol;Acc:2556]	ENSP00000376808	ENSG00000166266	CUL5	cullin 5 [Source:HGNC Symbol;Acc:2556]	ortholog_one2one				12	12	11	9	9	YES	YES	11	9	9	16.9	16.9	90.954	780	22	25	23	9.7731e-231	15.3	13.1	13.7	299420000	114760000	99146000	85509000	5649400	2165400	1870700	1613400
405	ENSMMUP00000002408;ENSMMUP00000037525	ENSMMUP00000002408	ENSMMUT00000002545	ENSMMUG00000001809	ENSMMUP00000002408|ENSMMUT00000002545|ENSMMUG00000001809|GPCPD1|glycerophosphocholine phosphodiesterase GDE1 homolog (S. cerevisiae) [Source:HGNC Symbol;Acc:26957]	ENSP00000368305	ENSG00000125772	GPCPD1	glycerophosphocholine phosphodiesterase GDE1 homolog (S. cerevisiae) [Source:HGNC Symbol;Acc:26957]	ortholog_one2one				4	4	3	1	2	YES	YES	3	1	2	6.9	6.9	74.142	654	4	1	2	4.4873e-12	4	1.7	5.2	9229400	2998300	1664000	4567100	249440	81035	44972	123440
406	ENSMMUP00000002416	ENSMMUP00000002416	ENSMMUT00000002554	ENSMMUG00000001814	ENSMMUP00000002416|ENSMMUT00000002554|ENSMMUG00000001814|LMCD1|LIM and cysteine-rich domains 1 [Source:HGNC Symbol;Acc:6633]	ENSP00000157600	ENSG00000071282	LMCD1	LIM and cysteine-rich domains 1 [Source:HGNC Symbol;Acc:6633]	ortholog_one2one				8	8	7	7	8	YES	YES	7	7	8	30.4	30.4	39.497	352	28	29	28	5.0207e-135	26.4	26.4	30.4	2226000000	722910000	803150000	699980000	82446000	26774000	29746000	25925000
407	ENSMMUP00000002417	ENSMMUP00000002417	ENSMMUT00000002556	ENSMMUG00000001816	ENSMMUP00000002417|ENSMMUT00000002556|ENSMMUG00000001816|MAPRE1|microtubule-associated protein, RP/EB family, member 1 [Source:HGNC Symbol;Acc:6890]	ENSP00000364721	ENSG00000101367	MAPRE1	microtubule-associated protein, RP/EB family, member 1 [Source:HGNC Symbol;Acc:6890]	apparent_ortholog_one2one				7	7	5	6	3	YES	YES	5	6	3	35.1	35.1	30.019	268	9	9	8	3.1225e-75	19.4	34.7	12.7	106060000	31567000	45042000	29454000	5582200	1661400	2370600	1550200
408	ENSMMUP00000002440;ENSMMUP00000002438;ENSMMUP00000002439	ENSMMUP00000002440	ENSMMUT00000002583	ENSMMUG00000001833	ENSMMUP00000002440|ENSMMUT00000002583|ENSMMUG00000001833|STX16|syntaxin 16 [Source:HGNC Symbol;Acc:11431];	ENSP00000457522	ENSG00000254995	STX16-NPEPL1	STX16-NPEPL1 readthrough (non-protein coding) [Source:HGNC Symbol;Acc:41993]	ortholog_one2one				2	2	2	2	2	YES	YES	2	2	2	10.3	10.3	43.692	387	3	2	3	1.4134e-16	10.3	10.3	10.3	21283000	5753800	10059000	5469800	967400	261540	457240	248630
409	ENSMMUP00000002443	ENSMMUP00000002443	ENSMMUT00000002586	ENSMMUG00000001836	ENSMMUP00000002443|ENSMMUT00000002586|ENSMMUG00000001836|ISLR|immunoglobulin superfamily containing leucine-rich repeat [Source:HGNC Symbol;Acc:6133]	ENSP00000249842	ENSG00000129009	ISLR	immunoglobulin superfamily containing leucine-rich repeat [Source:HGNC Symbol;Acc:6133]	ortholog_one2one				2	2	2	2	1	YES	YES	2	2	1	6.1	6.1	45.851	428	5	4	2	3.3684e-08	6.1	6.1	3.7	42095000	20316000	15644000	6134900	2806300	1354400	1042900	408990
410	ENSMMUP00000002451	ENSMMUP00000002451	ENSMMUT00000002595	ENSMMUG00000001841	ENSMMUP00000002451|ENSMMUT00000002595|ENSMMUG00000001841|SETD7|SET domain containing (lysine methyltransferase) 7 [Source:HGNC Symbol;Acc:30412]	ENSP00000274031	ENSG00000145391	SETD7	SET domain containing (lysine methyltransferase) 7 [Source:HGNC Symbol;Acc:30412]	ortholog_one2one				4	4	3	4	3	YES	YES	3	4	3	21	21	40.72	366	8	8	6	1.0272e-26	16.1	21	16.1	90363000	38744000	36833000	14786000	5315500	2279000	2166700	869760
412	ENSMMUP00000036966;ENSMMUP00000002469;ENSMMUP00000019822	ENSMMUP00000036966	ENSMMUT00000043968	ENSMMUG00000001856	ENSMMUP00000036966|ENSMMUT00000043968|ENSMMUG00000001856|XRCC6|X-ray repair complementing defective repair in Chinese hamster cells 6 [Source:HGNC Symbol;Acc:4055];	ENSP00000352257	ENSG00000196419	XRCC6	X-ray repair complementing defective repair in Chinese hamster cells 6 [Source:HGNC Symbol;Acc:4055]	ortholog_one2one				29	29	24	28	25	YES	YES	24	28	25	39.6	39.6	69.751	608	195	172	161	0	38.3	39.6	38.5	9865200000	3383600000	3367900000	3113700000	240610000	82527000	82144000	75944000
413	ENSMMUP00000002473;ENSMMUP00000002475;ENSMMUP00000037987	ENSMMUP00000002473	ENSMMUT00000002619	ENSMMUG00000001858	ENSMMUP00000002473|ENSMMUT00000002619|ENSMMUG00000001858|HNRNPA3|heterogeneous nuclear ribonucleoprotein A3 [Source:HGNC Symbol;Acc:24941];									16	16	16	16	12	YES	YES	16	16	12	33.6	33.6	38.056	348	90	80	79	8.4131e-225	33.6	33.6	23.3	10972000000	4133200000	3749400000	3089300000	548590000	206660000	187470000	154470000
415	ENSMMUP00000002488	ENSMMUP00000002488	ENSMMUT00000002634	ENSMMUG00000001871	ENSMMUP00000002488|ENSMMUT00000002634|ENSMMUG00000001871|AOC3|amine oxidase, copper containing 3 (vascular adhesion protein 1) [Source:HGNC Symbol;Acc:550]	ENSP00000312326	ENSG00000131471	AOC3	amine oxidase, copper containing 3 (vascular adhesion protein 1) [Source:HGNC Symbol;Acc:550]	ortholog_one2one				9	9	9	8	9	YES	YES	9	8	9	16.6	16.6	84.674	763	48	38	46	1.2015e-293	16.6	14	16.6	2608500000	893680000	832900000	881940000	74529000	25534000	23797000	25198000
416	ENSMMUP00000002495;ENSMMUP00000002496	ENSMMUP00000002495	ENSMMUT00000002641	ENSMMUG00000001873	ENSMMUP00000002495|ENSMMUT00000002641|ENSMMUG00000001873|CNOT7;	ENSP00000355279	ENSG00000198791	CNOT7	CCR4-NOT transcription complex, subunit 7 [Source:HGNC Symbol;Acc:14101]	ortholog_one2one				3	3	3	3	3	YES	YES	3	3	3	17.2	17.2	32.745	285	10	7	9	1.8085e-72	17.2	17.2	17.2	116850000	47311000	32666000	36869000	7302900	2957000	2041600	2304300
417	ENSMMUP00000002497	ENSMMUP00000002497	ENSMMUT00000002643	ENSMMUG00000001874	ENSMMUP00000002497|ENSMMUT00000002643|ENSMMUG00000001874|TM9SF3|transmembrane 9 superfamily member 3 [Source:HGNC Symbol;Acc:21529]	ENSP00000360184	ENSG00000077147	TM9SF3	transmembrane 9 superfamily member 3 [Source:HGNC Symbol;Acc:21529]	ortholog_one2one				4	4	4	4	3	YES	YES	4	4	3	10.1	10.1	67.542	587	12	11	11	5.852e-103	10.1	10.1	9.9	157730000	41807000	79602000	36325000	7169800	1900300	3618300	1651200
418	ENSMMUP00000002506	ENSMMUP00000002506	ENSMMUT00000002654	ENSMMUG00000001880	ENSMMUP00000002506|ENSMMUT00000002654|ENSMMUG00000001880|DDX60|DEAD (Asp-Glu-Ala-Asp) box polypeptide 60 [Source:HGNC Symbol;Acc:25942]	ENSP00000377344	ENSG00000137628	DDX60	DEAD (Asp-Glu-Ala-Asp) box polypeptide 60 [Source:HGNC Symbol;Acc:25942]	ortholog_one2one				4	4	3	2	2	YES	YES	3	2	2	3.7	3.7	198.09	1712	3	2	2	2.9806e-12	3.1	1.6	1.8	8624900	3650100	2768500	2206300	80606	34114	25873	20619
419	ENSMMUP00000002513;ENSMMUP00000002510	ENSMMUP00000002513	ENSMMUT00000002661	ENSMMUG00000001886	ENSMMUP00000002513|ENSMMUT00000002661|ENSMMUG00000001886|NP_001098632.1|ATP-binding cassette, sub-family F, member 1 [Source:RefSeq peptide;Acc:NP_001098632];	ENSP00000313603	ENSG00000204574	ABCF1	ATP-binding cassette, sub-family F (GCN20), member 1 [Source:HGNC Symbol;Acc:70]	ortholog_one2one				4	4	3	2	3	YES	YES	3	2	3	8.4	8.4	95.739	843	9	11	9	2.5052e-128	4.9	2.7	6.3	99844000	44770000	31965000	23109000	2322000	1041200	743370	537420
421	ENSMMUP00000002518	ENSMMUP00000002518	ENSMMUT00000002666	ENSMMUG00000001892	ENSMMUP00000002518|ENSMMUT00000002666|ENSMMUG00000001892|UGDH|UDP-glucose 6-dehydrogenase [Source:HGNC Symbol;Acc:12525]	ENSP00000319501	ENSG00000109814	UGDH	UDP-glucose 6-dehydrogenase [Source:HGNC Symbol;Acc:12525]	ortholog_one2one				14	14	13	14	13	YES	YES	13	14	13	42.5	42.5	55.077	494	36	35	29	5.6968e-152	38.5	42.5	38.5	1178900000	460580000	426710000	291610000	33683000	13159000	12192000	8331800
422	ENSMMUP00000002520;ENSMMUP00000002519;ENSMMUP00000040678;ENSMMUP00000040679;ENSMMUP00000002523;ENSMMUP00000040681;ENSMMUP00000040680;ENSMMUP00000002521	ENSMMUP00000002520	ENSMMUT00000002668	ENSMMUG00000001894	ENSMMUP00000002520|ENSMMUT00000002668|ENSMMUG00000001894|CDC2L1;	ENSP00000464036	ENSG00000248333	CDK11B	cyclin-dependent kinase 11B [Source:HGNC Symbol;Acc:1729]	ortholog_one2one				6	5	5	4	4	YES	YES	4	3	3	9.1	8.1	91.663	794	10	7	4	4.6927e-24	7.2	6.2	6.5	81472000	27639000	38244000	15589000	1733400	588060	813690	331690
423	ENSMMUP00000002522;ENSMMUP00000002524;ENSMMUP00000002529;ENSMMUP00000002528	ENSMMUP00000002522	ENSMMUT00000002670	ENSMMUG00000001893	ENSMMUP00000002522|ENSMMUT00000002670|ENSMMUG00000001893|Q9N148_MACMU|Interleukin-6 signal transducer receptor Fragment [Source:UniProtKB/TrEMBL;Acc:Q9N148];	ENSP00000370698	ENSG00000134352	IL6ST	interleukin 6 signal transducer (gp130, oncostatin M receptor) [Source:HGNC Symbol;Acc:6021]	ortholog_one2one				2	2	2	2	1	YES	YES	2	2	1	3.1	3.1	103.73	918	3	3	3	5.8491e-06	3.1	3.1	1.9	35923000	9233400	22151000	4538500	690830	177560	425990	87280
424	ENSMMUP00000002526;ENSMMUP00000040671;ENSMMUP00000040670	ENSMMUP00000002526	ENSMMUT00000002674	ENSMMUG00000001896	ENSMMUP00000002526|ENSMMUT00000002674|ENSMMUG00000001896|GNB1|guanine nucleotide binding protein (G protein), beta polypeptide 1 [Source:HGNC Symbol;Acc:4396]	ENSP00000367872	ENSG00000078369	GNB1	guanine nucleotide binding protein (G protein), beta polypeptide 1 [Source:HGNC Symbol;Acc:4396]	ortholog_one2one				8	7	8	8	7	YES	YES	7	7	6	33.5	30.3	37.377	340	43	38	38	0	33.5	33.5	32.4	3741700000	1531700000	1458100000	751870000	287820000	117830000	112160000	57836000
425	ENSMMUP00000002535	ENSMMUP00000002535	ENSMMUT00000002683	ENSMMUG00000001899	ENSMMUP00000002535|ENSMMUT00000002683|ENSMMUG00000001899									5	5	4	4	4	YES	YES	4	4	4	27.1	27.1	29.524	262	10	13	10	5.3603e-53	26.7	27.1	27.1	233210000	116090000	64189000	52931000	13718000	6828900	3775800	3113600
426	ENSMMUP00000002540	ENSMMUP00000002540	ENSMMUT00000002688	ENSMMUG00000001901	ENSMMUP00000002540|ENSMMUT00000002688|ENSMMUG00000001901|TMX1|thioredoxin-related transmembrane protein 1 [Source:HGNC Symbol;Acc:15487]	ENSP00000393316	ENSG00000139921	TMX1	thioredoxin-related transmembrane protein 1 [Source:HGNC Symbol;Acc:15487]	ortholog_one2one				4	4	4	4	4	YES	YES	4	4	4	9.3	9.3	31.834	280	14	14	14	6.9704e-143	9.3	9.3	9.3	249400000	109600000	67944000	71857000	22673000	9963900	6176700	6532500
427	ENSMMUP00000002555	ENSMMUP00000002555	ENSMMUT00000002703	ENSMMUG00000001913	ENSMMUP00000002555|ENSMMUT00000002703|ENSMMUG00000001913|MRPS23|mitochondrial ribosomal protein S23 [Source:HGNC Symbol;Acc:14509]	ENSP00000320184	ENSG00000181610	MRPS23	mitochondrial ribosomal protein S23 [Source:HGNC Symbol;Acc:14509]	ortholog_one2one				2	2	2	1	1	YES	YES	2	1	1	15.8	15.8	21.844	190	5	4	3	3.4982e-18	15.8	7.4	7.4	63382000	24847000	25669000	12866000	4527300	1774800	1833500	919030
430	ENSMMUP00000002566	ENSMMUP00000002566	ENSMMUT00000002714	ENSMMUG00000001916	ENSMMUP00000002566|ENSMMUT00000002714|ENSMMUG00000001916|IPO9|importin 9 [Source:HGNC Symbol;Acc:19425]	ENSP00000354742	ENSG00000198700	IPO9	importin 9 [Source:HGNC Symbol;Acc:19425]	ortholog_one2one				7	7	6	4	4	YES	YES	6	4	4	10.5	10.5	115.95	1041	8	7	6	4.2966e-72	8.9	6.3	6.8	65937000	15999000	31323000	18616000	1569900	380920	745770	443230
431	ENSMMUP00000002571	ENSMMUP00000002571	ENSMMUT00000002720	ENSMMUG00000001923	ENSMMUP00000002571|ENSMMUT00000002720|ENSMMUG00000001923|LMOD1|leiomodin 1 (smooth muscle) [Source:HGNC Symbol;Acc:6647]	ENSP00000356257	ENSG00000163431	LMOD1	leiomodin 1 (smooth muscle) [Source:HGNC Symbol;Acc:6647]	ortholog_one2one				5	5	5	5	5	YES	YES	5	5	5	11.3	11.3	70.5	631	12	11	10	5.9157e-47	11.3	11.3	11.3	213020000	96594000	78835000	37589000	5917200	2683200	2189900	1044100
433	ENSMMUP00000002575;ENSMMUP00000038073	ENSMMUP00000002575	ENSMMUT00000002725	ENSMMUG00000001926	ENSMMUP00000002575|ENSMMUT00000002725|ENSMMUG00000001926|RNPEP|arginyl aminopeptidase (aminopeptidase B) [Source:HGNC Symbol;Acc:10078];	ENSP00000295640	ENSG00000176393	RNPEP	arginyl aminopeptidase (aminopeptidase B) [Source:HGNC Symbol;Acc:10078]	ortholog_one2one				10	10	8	9	8	YES	YES	8	9	8	20.6	20.6	72.494	650	18	17	17	1.4927e-43	16.3	18.8	17.2	216870000	93542000	71841000	51483000	6378400	2751200	2113000	1514200
434	ENSMMUP00000002581	ENSMMUP00000002581	ENSMMUT00000002733	ENSMMUG00000001927	ENSMMUP00000002581|ENSMMUT00000002733|ENSMMUG00000001927|Q6UIL5_MACMU|Ku autoantigen Fragment [Source:UniProtKB/TrEMBL;Acc:Q6UIL5]									15	15	13	14	12	YES	YES	13	14	12	47.3	47.3	45.467	402	86	95	82	0	46.8	46.8	45.5	8932800000	2420200000	3763000000	2749600000	425370000	115250000	179190000	130930000
435	ENSMMUP00000002588;ENSMMUP00000002589	ENSMMUP00000002588	ENSMMUT00000002742	ENSMMUG00000001938	ENSMMUP00000002588|ENSMMUT00000002742|ENSMMUG00000001938|C17orf68|CST complex subunit CTC1 (Conserved telomere maintenance component 1)(HBV DNAPTP1-transactivated protein B) [Source:UniProtKB/Swiss-Prot;Acc:Q2NKJ3];	ENSP00000313759	ENSG00000178971	CTC1	CTS telomere maintenance complex component 1 [Source:HGNC Symbol;Acc:26169]	ortholog_one2one				2	2	1	1	1	YES	YES	1	1	1	1.8	1.8	133.13	1206	1	2	1	5.5824e-05	1	0.8	0.8	1516800	457380	850270	209170	24866	7498	13939	3429
436	ENSMMUP00000002591;ENSMMUP00000034832;ENSMMUP00000034829;ENSMMUP00000034831;ENSMMUP00000002594	ENSMMUP00000002591	ENSMMUT00000002745	ENSMMUG00000001940	ENSMMUP00000002591|ENSMMUT00000002745|ENSMMUG00000001940;	ENSP00000376889	ENSG00000011052	NME2	NME/NM23 nucleoside diphosphate kinase 2 [Source:HGNC Symbol;Acc:7850]	ortholog_one2one				10	10	10	10	9	YES	YES	10	10	9	56.9	56.9	30.137	267	160	134	142	1.7846e-260	56.9	56.9	50.6	7543600000	2402200000	3515800000	1625600000	314320000	100090000	146490000	67735000
437	ENSMMUP00000002609	ENSMMUP00000002609	ENSMMUT00000002764	ENSMMUG00000001953	ENSMMUP00000002609|ENSMMUT00000002764|ENSMMUG00000001953|QTRTD1|queuine tRNA-ribosyltransferase domain containing 1 [Source:HGNC Symbol;Acc:25771]	ENSP00000420682	ENSG00000151576	QTRTD1	queuine tRNA-ribosyltransferase domain containing 1 [Source:HGNC Symbol;Acc:25771]	ortholog_one2one				3	3	1	1	3	YES	YES	1	1	3	15.3	15.3	47.028	418	2	5	7	3.7388e-46	3.8	3.8	15.3	110900000	14106000	46342000	50452000	5040900	641160	2106400	2293300
438	ENSMMUP00000002632;ENSMMUP00000002634;ENSMMUP00000002633	ENSMMUP00000002632	ENSMMUT00000002788	ENSMMUG00000001974	ENSMMUP00000002632|ENSMMUT00000002788|ENSMMUG00000001974|Q3YAQ4_MACMU|NRAS-related protein Fragment [Source:UniProtKB/TrEMBL;Acc:Q3YAQ4];	ENSP00000407724	ENSG00000009307	CSDE1	cold shock domain containing E1, RNA-binding [Source:HGNC Symbol;Acc:29905]	ortholog_one2one				6	6	6	4	3	YES	YES	6	4	3	10.4	10.4	93.741	844	10	5	8	1.6413e-26	10.4	6.4	4	93397000	40120000	30284000	22993000	1729600	742970	560810	425800
439	ENSMMUP00000002639;ENSMMUP00000002637	ENSMMUP00000002639	ENSMMUT00000002795	ENSMMUG00000031438	ENSMMUP00000002639|ENSMMUT00000002795|ENSMMUG00000031438;									7	6	6	7	5	YES	YES	5	6	4	15	13.6	87.163	787	6	8	5	2.4678e-50	13	15	9.7	146880000	34965000	70715000	41203000	3060100	728440	1473200	858400
440	ENSMMUP00000002641;ENSMMUP00000002650;ENSMMUP00000002647	ENSMMUP00000002641	ENSMMUT00000002797	ENSMMUG00000001975	ENSMMUP00000002641|ENSMMUT00000002797|ENSMMUG00000001975;									2	2	1	2	1	YES	YES	1	2	1	6	6	70.129	648	1	2	1	1.1962e-06	2.8	6	2.8	13168000	6331800	4671800	2164100	299270	143900	106180	49185
443	ENSMMUP00000002653	ENSMMUP00000002653	ENSMMUT00000002809	ENSMMUG00000001983	ENSMMUP00000002653|ENSMMUT00000002809|ENSMMUG00000001983|STUB1|STIP1 homology and U-box containing protein 1 [Source:HGNC Symbol;Acc:11427]	ENSP00000219548	ENSG00000103266	STUB1	STIP1 homology and U-box containing protein 1, E3 ubiquitin protein ligase [Source:HGNC Symbol;Acc:11427]	ortholog_one2one				5	5	2	3	2	YES	YES	2	3	2	32.9	32.9	27.067	231	2	3	2	1.5611e-24	8.2	19.5	18.2	27180000	10821000	9120800	7238600	1430500	569520	480040	380980
444	ENSMMUP00000002656;ENSMMUP00000002657	ENSMMUP00000002656	ENSMMUT00000002812	ENSMMUG00000001986	ENSMMUP00000002656|ENSMMUT00000002812|ENSMMUG00000001986|WDR24|WD repeat domain 24 [Source:HGNC Symbol;Acc:20852];	ENSP00000293883	ENSG00000127580	WDR24	WD repeat domain 24 [Source:HGNC Symbol;Acc:20852]	ortholog_one2one				2	2	2	2	1	YES	YES	2	2	1	3.4	3.4	101.7	916	3	2	2	6.8893e-15	3.4	3.4	1.2	17497000	6609800	7637600	3249400	364520	137700	159120	67697
445	ENSMMUP00000002663;ENSMMUP00000025819	ENSMMUP00000002663	ENSMMUT00000002819	ENSMMUG00000001990	ENSMMUP00000002663|ENSMMUT00000002819|ENSMMUG00000001990|CAP2|CAP, adenylate cyclase-associated protein, 2 (yeast) [Source:HGNC Symbol;Acc:20039];	ENSP00000229922	ENSG00000112186	CAP2	CAP, adenylate cyclase-associated protein, 2 (yeast) [Source:HGNC Symbol;Acc:20039]	ortholog_one2one				7	7	6	5	4	YES	YES	6	5	4	24.1	24.1	52.801	477	15	10	6	1.1059e-47	18.7	18.7	15.9	108170000	44226000	39288000	24652000	3380200	1382100	1227700	770370
446	ENSMMUP00000002667;ENSMMUP00000002669	ENSMMUP00000002667	ENSMMUT00000002823	ENSMMUG00000001993	ENSMMUP00000002667|ENSMMUT00000002823|ENSMMUG00000001993|NUP153|nucleoporin 153kDa [Source:HGNC Symbol;Acc:8062];	ENSP00000262077	ENSG00000124789	NUP153	nucleoporin 153kDa [Source:HGNC Symbol;Acc:8062]	ortholog_one2one				5	5	3	2	4	YES	YES	3	2	4	7.1	7.1	153.72	1474	6	6	4	1.9308e-76	4	2.6	6.1	54600000	19658000	17418000	17524000	791300	284900	252430	253970
447	ENSMMUP00000038563;ENSMMUP00000002677;ENSMMUP00000002678;ENSMMUP00000038566;ENSMMUP00000002675;ENSMMUP00000002679	ENSMMUP00000038563	ENSMMUT00000045529	ENSMMUG00000001996	ENSMMUP00000038563|ENSMMUT00000045529|ENSMMUG00000001996|F11R;	ENSP00000357005	ENSG00000158769	F11R	F11 receptor [Source:HGNC Symbol;Acc:14685]	ortholog_one2one				2	2	2	1	2	YES	YES	2	1	2	7.1	7.1	35.263	324	4	3	3	9.701e-12	7.1	3.4	7.1	24451000	14155000	7350400	2945500	1222500	707740	367520	147280
449	ENSMMUP00000002683	ENSMMUP00000002683	ENSMMUT00000002840	ENSMMUG00000002004	ENSMMUP00000002683|ENSMMUT00000002840|ENSMMUG00000002004|CDKN2AIP|CDKN2A interacting protein [Source:HGNC Symbol;Acc:24325]	ENSP00000427108	ENSG00000168564	CDKN2AIP	CDKN2A interacting protein [Source:HGNC Symbol;Acc:24325]	ortholog_one2one				2	2	2	1	1	YES	YES	2	1	1	3.4	3.4	61.076	580	6	5	4	4.0371e-20	3.4	1.9	1.9	15100000	4931500	3976600	6191800	419440	136990	110460	171990
451	ENSMMUP00000038555;ENSMMUP00000002688;ENSMMUP00000002689;ENSMMUP00000038556	ENSMMUP00000038555	ENSMMUT00000045522	ENSMMUG00000002009	ENSMMUP00000038555|ENSMMUT00000045522|ENSMMUG00000002009|NIT1|nitrilase 1 [Source:HGNC Symbol;Acc:7828];	ENSP00000356988	ENSG00000158793	NIT1	nitrilase 1 [Source:HGNC Symbol;Acc:7828]	ortholog_one2one				3	3	3	2	3	YES	YES	3	2	3	12.4	12.4	39.559	363	5	3	6	1.7544e-19	12.4	8.8	12.4	117220000	62229000	29356000	25636000	6169500	3275200	1545100	1349200
452	ENSMMUP00000002695	ENSMMUP00000002695	ENSMMUT00000002852	ENSMMUG00000002013	ENSMMUP00000002695|ENSMMUT00000002852|ENSMMUG00000002013|RBM45|RNA binding motif protein 45 [Source:HGNC Symbol;Acc:24468]	ENSP00000286070	ENSG00000155636	RBM45	RNA binding motif protein 45 [Source:HGNC Symbol;Acc:24468]	ortholog_one2one				2	2	1	2	1	YES	YES	1	2	1	7.8	7.8	53.338	474	4	6	5	2.5955e-30	3	7.8	3	38739000	8601100	17296000	12841000	1139400	252970	508710	377690
454	ENSMMUP00000002705	ENSMMUP00000002705	ENSMMUT00000002862	ENSMMUG00000002021	ENSMMUP00000002705|ENSMMUT00000002862|ENSMMUG00000002021|BDH1|3-hydroxybutyrate dehydrogenase, type 1 [Source:HGNC Symbol;Acc:1027]	ENSP00000376184	ENSG00000161267	BDH1	3-hydroxybutyrate dehydrogenase, type 1 [Source:HGNC Symbol;Acc:1027]	ortholog_one2one				7	7	5	5	7	YES	YES	5	5	7	30.3	30.3	38.019	343	9	9	11	1.9233e-104	21.3	21.3	30.3	95815000	34241000	33719000	27854000	4562600	1630500	1605700	1326400
456	ENSMMUP00000002718;ENSMMUP00000032198;ENSMMUP00000032199;ENSMMUP00000032197;ENSMMUP00000033726	ENSMMUP00000002718	ENSMMUT00000002875	ENSMMUG00000002032	ENSMMUP00000002718|ENSMMUT00000002875|ENSMMUG00000002032|XPO7|exportin 7 [Source:HGNC Symbol;Acc:14108];	ENSP00000252512	ENSG00000130227	XPO7	exportin 7 [Source:HGNC Symbol;Acc:14108]	ortholog_one2one				9	9	8	8	7	YES	YES	8	8	7	13.8	13.8	123.37	1079	30	32	28	2.0389e-165	11.5	11.5	10.8	296980000	104930000	118300000	73753000	4949700	1748800	1971700	1229200
457	ENSMMUP00000002734	ENSMMUP00000002734	ENSMMUT00000002892	ENSMMUG00000002043	ENSMMUP00000002734|ENSMMUT00000002892|ENSMMUG00000002043|CD81|CD81 molecule [Source:HGNC Symbol;Acc:1701]	ENSP00000263645	ENSG00000110651	CD81	CD81 molecule [Source:HGNC Symbol;Acc:1701]	ortholog_one2one				3	3	2	3	2	YES	YES	2	3	2	25	25	25.758	236	5	7	6	5.2248e-140	15.3	25	15.3	553650000	126100000	249440000	178110000	69207000	15763000	31179000	22264000
458	ENSMMUP00000039868;ENSMMUP00000002741;ENSMMUP00000002742	ENSMMUP00000039868	ENSMMUT00000046839	ENSMMUG00000002045	ENSMMUP00000039868|ENSMMUT00000046839|ENSMMUG00000002045|PFKM|phosphofructokinase, muscle [Source:HGNC Symbol;Acc:8877];	ENSP00000345771	ENSG00000152556	PFKM	phosphofructokinase, muscle [Source:HGNC Symbol;Acc:8877]	ortholog_one2one				15	14	13	12	9	YES	YES	12	11	9	28.8	27.7	93.269	851	47	45	34	0	24.3	23.1	18.7	1439600000	661400000	407280000	370870000	32717000	15032000	9256300	8428900
459	ENSMMUP00000002745	ENSMMUP00000002745	ENSMMUT00000002903	ENSMMUG00000002050	ENSMMUP00000002745|ENSMMUT00000002903|ENSMMUG00000002050|PAFAH1B2|platelet-activating factor acetylhydrolase 1b, catalytic subunit 2 (30kDa) [Source:HGNC Symbol;Acc:8575]	ENSP00000435289	ENSG00000168092	PAFAH1B2	platelet-activating factor acetylhydrolase 1b, catalytic subunit 2 (30kDa) [Source:HGNC Symbol;Acc:8575]	ortholog_one2one				6	6	6	5	6	YES	YES	6	5	6	50.2	50.2	25.569	229	29	31	27	6.3667e-256	50.2	33.6	50.2	1417800000	461110000	446830000	509900000	157540000	51234000	49647000	56655000
460	ENSMMUP00000002752;ENSMMUP00000036681;ENSMMUP00000034098	ENSMMUP00000002752	ENSMMUT00000002912	ENSMMUG00000002058	ENSMMUP00000002752|ENSMMUT00000002912|ENSMMUG00000002058|TAGLN;	ENSP00000432282	ENSG00000149591	TAGLN	transgelin [Source:HGNC Symbol;Acc:11553]	ortholog_one2one				6	6	6	6	5	YES	YES	6	6	5	42.8	42.8	22.625	201	40	36	24	5.5784e-155	42.8	42.8	30.3	3250400000	1258000000	1332900000	659510000	191200000	73997000	78405000	38795000
461	ENSMMUP00000002759	ENSMMUP00000002759	ENSMMUT00000002919	ENSMMUG00000002063	ENSMMUP00000002759|ENSMMUT00000002919|ENSMMUG00000002063|ERAP1|endoplasmic reticulum aminopeptidase 1 [Source:HGNC Symbol;Acc:18173]	ENSP00000296754	ENSG00000164307	ERAP1	endoplasmic reticulum aminopeptidase 1 [Source:HGNC Symbol;Acc:18173]	ortholog_one2one				13	13	11	11	13	YES	YES	11	11	13	17.9	17.9	107.58	941	44	37	45	2.68e-139	13.8	13.8	17.9	744690000	253300000	245550000	245850000	15845000	5389400	5224400	5230800
463	ENSMMUP00000002763;ENSMMUP00000036679	ENSMMUP00000002763	ENSMMUT00000002923	ENSMMUG00000002067	ENSMMUP00000002763|ENSMMUT00000002923|ENSMMUG00000002067|RNF214|ring finger protein 214 [Source:HGNC Symbol;Acc:25335];	ENSP00000431643	ENSG00000167257	RNF214	ring finger protein 214 [Source:HGNC Symbol;Acc:25335]	ortholog_one2one				2	2	2	2	1	YES	YES	2	2	1	5.3	5.3	70.977	636	3	3	1	5.4213e-29	5.3	5.3	2.5	24505000	5743300	10227000	8535700	612640	143580	255660	213390
464	ENSMMUP00000002766;ENSMMUP00000002767	ENSMMUP00000002766	ENSMMUT00000002926	ENSMMUG00000002069	ENSMMUP00000002766|ENSMMUT00000002926|ENSMMUG00000002069|MSI2|musashi homolog 2 (Drosophila) [Source:HGNC Symbol;Acc:18585];	ENSP00000284073	ENSG00000153944	MSI2	musashi RNA-binding protein 2 [Source:HGNC Symbol;Acc:18585]	ortholog_one2one				3	3	3	3	3	YES	YES	3	3	3	13.9	13.9	31.952	295	7	9	7	1.7732e-92	13.9	13.9	13.9	209460000	60521000	91554000	57387000	17455000	5043400	7629500	4782200
465	ENSMMUP00000002781	ENSMMUP00000002781	ENSMMUT00000002944	ENSMMUG00000002083	ENSMMUP00000002781|ENSMMUT00000002944|ENSMMUG00000002083									5	1	5	5	4	YES	YES	1	1	1	13.6	6.2	29.061	257	1	2	1	3.9519e-79	13.6	13.6	10.5	49882000	1239700	45769000	2873500	3325500	82649	3051200	191560
466	ENSMMUP00000002782;ENSMMUP00000025472	ENSMMUP00000002782	ENSMMUT00000002945	ENSMMUG00000011073	ENSMMUP00000002782|ENSMMUT00000002945|ENSMMUG00000011073|Q3YAP6_MACMU|Heat shock 90kDa protein 1, alpha Fragment [Source:UniProtKB/TrEMBL;Acc:Q3YAP6]									12	3	11	11	8	YES	YES	2	3	2	34.5	10.2	35.889	313	52	46	62	0	34.5	31.6	28.8	3337200000	1235800000	1359400000	742050000	222480000	82386000	90624000	49470000
468	ENSMMUP00000002788	ENSMMUP00000002788	ENSMMUT00000002951	ENSMMUG00000002090	ENSMMUP00000002788|ENSMMUT00000002951|ENSMMUG00000002090|ATP6V1B1|ATPase, H+ transporting, lysosomal 56/58kDa, V1 subunit B1 [Source:HGNC Symbol;Acc:853]	ENSP00000234396	ENSG00000116039	ATP6V1B1	ATPase, H+ transporting, lysosomal 56/58kDa, V1 subunit B1 [Source:HGNC Symbol;Acc:853]	ortholog_one2one				7	1	5	5	6	YES	YES	0	0	1	19.1	2.9	56.832	513			3	1.0804e-94	13.5	13.5	16.2	69516000	0	0	69516000	2242500	0	0	2242500
469	ENSMMUP00000002789;ENSMMUP00000039352	ENSMMUP00000002789	ENSMMUT00000002952	ENSMMUG00000002088	ENSMMUP00000002789|ENSMMUT00000002952|ENSMMUG00000002088|SMU1|smu-1 suppressor of mec-8 and unc-52 homolog (C. elegans) [Source:HGNC Symbol;Acc:18247];	ENSP00000380336	ENSG00000122692	SMU1	smu-1 suppressor of mec-8 and unc-52 homolog (C. elegans) [Source:HGNC Symbol;Acc:18247]	ortholog_one2one				10	10	6	8	5	YES	YES	6	8	5	32.4	32.4	57.543	513	22	20	20	7.1315e-111	20.9	25	16.4	703100000	225710000	277480000	199920000	21972000	7053500	8671100	6247400
470	ENSMMUP00000002797	ENSMMUP00000002797	ENSMMUT00000002961	ENSMMUG00000002096	ENSMMUP00000002797|ENSMMUT00000002961|ENSMMUG00000002096|NAGK|N-acetylglucosamine kinase [Source:HGNC Symbol;Acc:17174]	ENSP00000389087	ENSG00000124357	NAGK	N-acetylglucosamine kinase [Source:HGNC Symbol;Acc:17174]	ortholog_one2one				7	7	5	7	5	YES	YES	5	7	5	27.9	27.9	37.294	344	24	26	25	7.9421e-263	22.4	27.9	22.4	538500000	182350000	189370000	166780000	28342000	9597100	9966900	8778100
471	ENSMMUP00000002806	ENSMMUP00000002806	ENSMMUT00000002970	ENSMMUG00000002105	ENSMMUP00000002806|ENSMMUT00000002970|ENSMMUG00000002105|ZP4|zona pellucida glycoprotein 4 [Source:HGNC Symbol;Acc:15770]	ENSP00000355529	ENSG00000116996	ZP4	zona pellucida glycoprotein 4 [Source:HGNC Symbol;Acc:15770]	ortholog_one2one				12	12	12	12	12	YES	YES	12	12	12	37.3	37.3	52.896	477	133	111	110	0	37.3	37.3	37.3	14912000000	5660200000	4854900000	4396900000	784840000	297910000	255520000	231410000
473	ENSMMUP00000002815;ENSMMUP00000036384	ENSMMUP00000002815	ENSMMUT00000002980	ENSMMUG00000002113	ENSMMUP00000002815|ENSMMUT00000002980|ENSMMUG00000002113|NHLRC3|NHL repeat containing 3 [Source:HGNC Symbol;Acc:33751];	ENSP00000368920	ENSG00000188811	NHLRC3	NHL repeat containing 3 [Source:HGNC Symbol;Acc:33751]	ortholog_one2one				4	4	3	2	3	YES	YES	3	2	3	12.7	12.7	38.234	347	5	3	4	7.3047e-34	12.4	7.5	12.4	57700000	29114000	10434000	18152000	3394100	1712600	613790	1067700
474	ENSMMUP00000002816;ENSMMUP00000003944	ENSMMUP00000002816	ENSMMUT00000002982	ENSMMUG00000002114	ENSMMUP00000002816|ENSMMUT00000002982|ENSMMUG00000002114|TFRC|transferrin receptor (p90, CD71) [Source:HGNC Symbol;Acc:11763];	ENSP00000353224	ENSG00000072274	TFRC	transferrin receptor (p90, CD71) [Source:HGNC Symbol;Acc:11763]	ortholog_one2one				15	15	12	13	13	YES	YES	12	13	13	26.3	26.3	84.907	760	35	38	36	1.4156e-258	21.2	22	22.9	982780000	341180000	353140000	288460000	20910000	7259200	7513700	6137400
476	ENSMMUP00000002824	ENSMMUP00000002824	ENSMMUT00000002991	ENSMMUG00000002122	ENSMMUP00000002824|ENSMMUT00000002991|ENSMMUG00000002122|SPOCK2|sparc/osteonectin, cwcv and kazal-like domains proteoglycan (testican) 2 [Source:HGNC Symbol;Acc:13564]	ENSP00000321108	ENSG00000107742	SPOCK2	sparc/osteonectin, cwcv and kazal-like domains proteoglycan (testican) 2 [Source:HGNC Symbol;Acc:13564]	ortholog_one2one				2	2	2	2	2	YES	YES	2	2	2	3.1	3.1	46.791	424	4	2	3	1.8708e-05	3.1	3.1	3.1	10270000	4192200	1037700	5040400	410810	167690	41509	201620
478	ENSMMUP00000002837;ENSMMUP00000002838	ENSMMUP00000002837	ENSMMUT00000003005	ENSMMUG00000002132	ENSMMUP00000002837|ENSMMUT00000003005|ENSMMUG00000002132|PSMD12|proteasome (prosome, macropain) 26S subunit, non-ATPase, 12 [Source:HGNC Symbol;Acc:9557];	ENSP00000348442	ENSG00000197170	PSMD12	proteasome (prosome, macropain) 26S subunit, non-ATPase, 12 [Source:HGNC Symbol;Acc:9557]	ortholog_one2one				9	9	8	5	6	YES	YES	8	5	6	24.1	24.1	52.904	456	11	7	14	9.9613e-46	21.3	14	17.1	196760000	28283000	57120000	111350000	5787000	831850	1680000	3275100
480	ENSMMUP00000002843;ENSMMUP00000028473	ENSMMUP00000002843	ENSMMUT00000003011	ENSMMUG00000021618	ENSMMUP00000002843|ENSMMUT00000003011|ENSMMUG00000021618|KIAA1274|KIAA1274 [Source:HGNC Symbol;Acc:23530];	ENSP00000263563	ENSG00000107719	PALD1	phosphatase domain containing, paladin 1 [Source:HGNC Symbol;Acc:23530]	ortholog_one2one				3	3	1	2	3	YES	YES	1	2	3	5.8	5.8	96.037	855	1	3	3	2.1372e-46	1.5	4.1	5.8	16074000	2555900	7250300	6268100	272450	43321	122890	106240
481	ENSMMUP00000002844	ENSMMUP00000002844	ENSMMUT00000003012	ENSMMUG00000002134	ENSMMUP00000002844|ENSMMUT00000003012|ENSMMUG00000002134|RPS6KA3|ribosomal protein S6 kinase, 90kDa, polypeptide 3 [Source:HGNC Symbol;Acc:10432]	ENSP00000368884	ENSG00000177189	RPS6KA3	ribosomal protein S6 kinase, 90kDa, polypeptide 3 [Source:HGNC Symbol;Acc:10432]	ortholog_one2one				9	8	5	5	8	YES	YES	4	4	7	16.6	14.4	83.847	741	13	16	16	1.9592e-35	11.7	10.3	15.7	313610000	126980000	77672000	108960000	6672600	2701800	1652600	2318200
482	ENSMMUP00000002846;ENSMMUP00000002848;ENSMMUP00000002847;ENSMMUP00000036442	ENSMMUP00000002846	ENSMMUT00000003014	ENSMMUG00000002136	ENSMMUP00000002846|ENSMMUT00000003014|ENSMMUG00000002136|HTRA2|HtrA serine peptidase 2 [Source:HGNC Symbol;Acc:14348];	ENSP00000258080	ENSG00000115317	HTRA2	HtrA serine peptidase 2 [Source:HGNC Symbol;Acc:14348]	ortholog_one2one				3	3	3	2	2	YES	YES	3	2	2	11.1	11.1	48.75	458	6	3	9	5.5256e-44	11.1	7.9	8.5	168250000	74698000	50367000	43182000	6471000	2873000	1937200	1660800
483	ENSMMUP00000002858	ENSMMUP00000002858	ENSMMUT00000003026	ENSMMUG00000002142	ENSMMUP00000002858|ENSMMUT00000003026|ENSMMUG00000002142|NENF|neuron derived neurotrophic factor [Source:HGNC Symbol;Acc:30384]	ENSP00000355955	ENSG00000117691	NENF	neudesin neurotrophic factor [Source:HGNC Symbol;Acc:30384]	ortholog_one2one				3	3	2	2	2	YES	YES	2	2	2	32	32	18.729	172	4	4	2	3.9838e-18	25.6	21.5	21.5	104840000	22086000	65005000	17749000	8736600	1840500	5417100	1479100
484	ENSMMUP00000019717;ENSMMUP00000002860	ENSMMUP00000019717	ENSMMUT00000021087	ENSMMUG00000002144	ENSMMUP00000019717|ENSMMUT00000021087|ENSMMUG00000002144;						ENSMUSP00000135639	ENSMUSG00000024613	ortholog_one2one	3	3	1	1	2	YES	YES	1	1	2	3.2	3.2	156.32	1386	1	2	2	2.3958e-10	1.3	1.3	1.9	11338000	1685600	5716600	3935700	169220	25158	85323	58741
485	ENSMMUP00000002861	ENSMMUP00000002861	ENSMMUT00000003029	ENSMMUG00000002145	ENSMMUP00000002861|ENSMMUT00000003029|ENSMMUG00000002145|PHF17|PHD finger protein 17 [Source:HGNC Symbol;Acc:30027]	ENSP00000226319	ENSG00000077684	PHF17	PHD finger protein 17 [Source:HGNC Symbol;Acc:30027]	ortholog_one2one				2	2	2	2	2	YES	YES	2	2	2	4.6	4.6	95.679	843	2	2	4	1.1055e-42	4.6	4.6	4.6	10101000	1938100	4268800	3893900	187050	35890	79052	72110
486	ENSMMUP00000002864	ENSMMUP00000002864	ENSMMUT00000003032	ENSMMUG00000002148	ENSMMUP00000002864|ENSMMUT00000003032|ENSMMUG00000002148|C4orf33|UPF0462 protein C4orf33 [Source:UniProtKB/Swiss-Prot;Acc:Q8N1A6]	ENSP00000281146	ENSG00000151470	C4orf33	chromosome 4 open reading frame 33 [Source:HGNC Symbol;Acc:27025]	ortholog_one2one				2	2	2	1	1	YES	YES	2	1	1	22.5	22.5	24.122	204	3	1	2	3.8486e-11	22.5	13.7	13.7	31153000	4722000	2860200	23571000	2596100	393500	238350	1964200
488	ENSMMUP00000002867	ENSMMUP00000002867	ENSMMUT00000003035	ENSMMUG00000002149	ENSMMUP00000002867|ENSMMUT00000003035|ENSMMUG00000002149|VPS25|vacuolar protein sorting 25 homolog (S. cerevisiae) [Source:HGNC Symbol;Acc:28122]	ENSP00000253794	ENSG00000131475	VPS25	vacuolar protein sorting 25 homolog (S. cerevisiae) [Source:HGNC Symbol;Acc:28122]	ortholog_one2one				6	6	6	6	6	YES	YES	6	6	6	47.2	47.2	20.747	176	23	24	25	5.4279e-121	47.2	47.2	47.2	230030000	51099000	101080000	77844000	20911000	4645300	9189400	7076700
489	ENSMMUP00000002875;ENSMMUP00000002874	ENSMMUP00000002875	ENSMMUT00000003043	ENSMMUG00000002153	ENSMMUP00000002875|ENSMMUT00000003043|ENSMMUG00000002153|G3BP2|GTPase activating protein (SH3 domain) binding protein 2 [Source:HGNC Symbol;Acc:30291];	ENSP00000352738	ENSG00000138757	G3BP2	GTPase activating protein (SH3 domain) binding protein 2 [Source:HGNC Symbol;Acc:30291]	ortholog_one2one				5	4	3	3	4	YES	YES	2	2	3	17.6	16	54.124	482	8	9	12	5.6183e-33	7.3	7.3	15.6	141740000	42186000	48547000	51009000	5062200	1506600	1733800	1821700
490	ENSMMUP00000002883;ENSMMUP00000004823;ENSMMUP00000013867;ENSMMUP00000005910;ENSMMUP00000023766;ENSMMUP00000011928;ENSMMUP00000011929	ENSMMUP00000002883	ENSMMUT00000003053	ENSMMUG00000002163	ENSMMUP00000002883|ENSMMUT00000003053|ENSMMUG00000002163|KRT8|keratin 8 [Source:HGNC Symbol;Acc:6446]									11	9	10	11	8	YES	YES	8	9	6	24.2	20.5	53.66	483	30	28	21	1.0903e-257	20.3	24.2	18.6	1585800000	540740000	547080000	497940000	49555000	16898000	17096000	15561000
491	ENSMMUP00000039432;ENSMMUP00000002884;ENSMMUP00000008582;ENSMMUP00000039430	ENSMMUP00000039432	ENSMMUT00000046387	ENSMMUG00000002164	ENSMMUP00000039432|ENSMMUT00000046387|ENSMMUG00000002164|PA2G4|proliferation-associated 2G4, 38kDa [Source:HGNC Symbol;Acc:8550];	ENSP00000302886	ENSG00000170515	PA2G4	proliferation-associated 2G4, 38kDa [Source:HGNC Symbol;Acc:8550]	ortholog_one2one				8	8	7	8	8	YES	YES	7	8	8	24.9	24.9	43.728	394	26	26	25	2.8462e-86	19.5	24.9	24.9	1438400000	553280000	497030000	388120000	59935000	23053000	20709000	16172000
493	ENSMMUP00000002886	ENSMMUP00000002886	ENSMMUT00000003057	ENSMMUG00000002167	ENSMMUP00000002886|ENSMMUT00000003057|ENSMMUG00000002167|MRC2|mannose receptor, C type 2 [Source:HGNC Symbol;Acc:16875]	ENSP00000307513	ENSG00000011028	MRC2	mannose receptor, C type 2 [Source:HGNC Symbol;Acc:16875]	ortholog_one2one				13	13	8	8	10	YES	YES	8	8	10	13.8	13.8	166.51	1479	14	17	23	6.7888e-174	8.7	8.8	10.1	446350000	183760000	147520000	115070000	6867000	2827000	2269600	1770300
494	ENSMMUP00000002891;ENSMMUP00000002892;ENSMMUP00000028715	ENSMMUP00000002891	ENSMMUT00000003062	ENSMMUG00000002171	ENSMMUP00000002891|ENSMMUT00000003062|ENSMMUG00000002171|LOC723032;	ENSP00000263934	ENSG00000054523	KIF1B	kinesin family member 1B [Source:HGNC Symbol;Acc:16636]	ortholog_one2one				3	3	2	2	2	YES	YES	2	2	2	2.7	2.7	205.58	1823	4	4	4	8.4986e-42	1.4	1.4	1.8	23486000	9460700	5951600	8074000	217470	87599	55108	74759
495	ENSMMUP00000002900	ENSMMUP00000002900	ENSMMUT00000003071	ENSMMUG00000002176	ENSMMUP00000002900|ENSMMUT00000003071|ENSMMUG00000002176|UHRF2|ubiquitin-like with PHD and ring finger domains 2 [Source:HGNC Symbol;Acc:12557]	ENSP00000276893	ENSG00000147854	UHRF2	ubiquitin-like with PHD and ring finger domains 2, E3 ubiquitin protein ligase [Source:HGNC Symbol;Acc:12557]	ortholog_one2one				2	2	2	2	2	YES	YES	2	2	2	4.2	4.2	90.096	800	3	2	2	1.059e-20	4.2	4.2	4.2	8692100	3376300	2638500	2677300	177390	68905	53847	54638
497	ENSMMUP00000002913;ENSMMUP00000038089	ENSMMUP00000002913	ENSMMUT00000003086	ENSMMUG00000002185	ENSMMUP00000002913|ENSMMUT00000003086|ENSMMUG00000002185|LOC709385;	ENSP00000318176	ENSG00000180228	PRKRA	protein kinase, interferon-inducible double stranded RNA dependent activator [Source:HGNC Symbol;Acc:9438]	ortholog_one2one				4	4	4	4	3	YES	YES	4	4	3	20.1	20.1	34.404	313	19	21	20	7.7589e-137	20.1	20.1	16.3	746980000	248450000	329230000	169300000	49799000	16563000	21948000	11287000
498	ENSMMUP00000002916	ENSMMUP00000002916	ENSMMUT00000003089	ENSMMUG00000002187	ENSMMUP00000002916|ENSMMUT00000003089|ENSMMUG00000002187|FKBP7|FK506 binding protein 7 [Source:HGNC Symbol;Acc:3723]	ENSP00000413152	ENSG00000079150	FKBP7	FK506 binding protein 7 [Source:HGNC Symbol;Acc:3723]	ortholog_one2one				5	5	5	5	5	YES	YES	5	5	5	11.7	11.7	25.741	222	15	15	10	2.9144e-92	11.7	11.7	11.7	351530000	134000000	111880000	105640000	19529000	7444700	6215700	5869000
499	ENSMMUP00000002926;ENSMMUP00000002929;ENSMMUP00000034151	ENSMMUP00000002926	ENSMMUT00000003100	ENSMMUG00000002194	ENSMMUP00000002926|ENSMMUT00000003100|ENSMMUG00000002194|LOC719021;	ENSP00000464977	ENSG00000108946	PRKAR1A	protein kinase, cAMP-dependent, regulatory, type I, alpha [Source:HGNC Symbol;Acc:9388]	ortholog_one2one				8	8	6	7	5	YES	YES	6	7	5	28.1	28.1	43.011	381	21	19	23	5.5885e-135	17.3	28.1	16	1315000000	398160000	578510000	338350000	62620000	18960000	27548000	16112000
502	ENSMMUP00000002947	ENSMMUP00000002947	ENSMMUT00000003122	ENSMMUG00000002204	ENSMMUP00000002947|ENSMMUT00000003122|ENSMMUG00000002204|PIGN|phosphatidylinositol glycan anchor biosynthesis, class N [Source:HGNC Symbol;Acc:8967]	ENSP00000350263	ENSG00000197563	PIGN	phosphatidylinositol glycan anchor biosynthesis, class N [Source:HGNC Symbol;Acc:8967]	ortholog_one2one				2	2	2	2	1	YES	YES	2	2	1	3	3	106.37	930	2	3	2	1.8067e-16	3	3	1.3	8726600	2297000	3904500	2525100	256670	67559	114840	74268
503	ENSMMUP00000002952;ENSMMUP00000002951	ENSMMUP00000002952	ENSMMUT00000003127	ENSMMUG00000002209	ENSMMUP00000002952|ENSMMUT00000003127|ENSMMUG00000002209|KIAA1468|KIAA1468 [Source:HGNC Symbol;Acc:29289];	ENSP00000381198	ENSG00000134444	KIAA1468	KIAA1468 [Source:HGNC Symbol;Acc:29289]	ortholog_one2one				5	5	5	5	5	YES	YES	5	5	5	6.4	6.4	124.11	1105	15	12	10	2.5663e-143	6.4	6.4	6.4	57802000	18162000	26203000	13436000	932290	292940	422640	216710
504	ENSMMUP00000002956	ENSMMUP00000002956	ENSMMUT00000003131	ENSMMUG00000031999	ENSMMUP00000002956|ENSMMUT00000003131|ENSMMUG00000031999									3	3	2	3	3	YES	YES	2	3	3	42.5	42.5	9.1144	80	3	12	10	1.6416e-42	33.8	42.5	42.5	102510000	41579000	30484000	30451000	20503000	8315800	6096900	6090100
505	ENSMMUP00000002957;ENSMMUP00000039804	ENSMMUP00000002957	ENSMMUT00000003132	ENSMMUG00000002213	ENSMMUP00000002957|ENSMMUT00000003132|ENSMMUG00000002213									10	10	9	10	8	YES	YES	9	10	8	48.2	48.2	37.076	336	25	24	21	1.227e-200	39.3	48.2	40.5	566970000	247590000	195760000	123610000	29840000	13031000	10303000	6505900
506	ENSMMUP00000002960	ENSMMUP00000002960	ENSMMUT00000003136	ENSMMUG00000002217	ENSMMUP00000002960|ENSMMUT00000003136|ENSMMUG00000002217|ALPL|alkaline phosphatase, liver/bone/kidney [Source:HGNC Symbol;Acc:438]	ENSP00000363973	ENSG00000162551	ALPL	alkaline phosphatase, liver/bone/kidney [Source:HGNC Symbol;Acc:438]	ortholog_one2one				7	7	7	6	5	YES	YES	7	6	5	17.9	17.9	57.454	524	14	11	10	2.7102e-52	17.9	17.4	15.1	222050000	79731000	66322000	76002000	7930500	2847500	2368600	2714400
507	ENSMMUP00000002964;ENSMMUP00000002962;ENSMMUP00000034709	ENSMMUP00000002964	ENSMMUT00000003140	ENSMMUG00000002212	ENSMMUP00000002964|ENSMMUT00000003140|ENSMMUG00000002212|LRBA|LPS-responsive vesicle trafficking, beach and anchor containing [Source:HGNC Symbol;Acc:1742];	ENSP00000349629	ENSG00000198589	LRBA	LPS-responsive vesicle trafficking, beach and anchor containing [Source:HGNC Symbol;Acc:1742]	ortholog_one2one				6	4	3	5	4	YES	YES	1	3	2	4.2	3.1	318.89	2863	10	13	10	8.3405e-128	1.4	3	2.6	121300000	27011000	60807000	33477000	772580	172040	387310	213230
510	ENSMMUP00000002978;ENSMMUP00000036946	ENSMMUP00000002978	ENSMMUT00000003155	ENSMMUG00000002229	ENSMMUP00000002978|ENSMMUT00000003155|ENSMMUG00000002229|LOC711160;	ENSP00000263245	ENSG00000242247	ARFGAP3	ADP-ribosylation factor GTPase activating protein 3 [Source:HGNC Symbol;Acc:661]	ortholog_one2one				5	5	3	5	4	YES	YES	3	5	4	14.7	14.7	56.824	516	7	9	9	2.8521e-64	7.8	14.7	13	84382000	17887000	48393000	18101000	2481800	526100	1423300	532380
511	ENSMMUP00000002980;ENSMMUP00000002979	ENSMMUP00000002980	ENSMMUT00000003157	ENSMMUG00000002227	ENSMMUP00000002980|ENSMMUT00000003157|ENSMMUG00000002227|LOC723458;	ENSP00000355809	ENSG00000154380	ENAH	enabled homolog (Drosophila) [Source:HGNC Symbol;Acc:18271]	ortholog_one2one				2	2	2	2	2	YES	YES	2	2	2	7	7	51.877	460	5	5	3	1.9015e-14	7	7	7	38394000	20586000	13140000	4667500	1669300	895050	571320	202940
512	ENSMMUP00000002993	ENSMMUP00000002993	ENSMMUT00000003172	ENSMMUG00000002241	ENSMMUP00000002993|ENSMMUT00000003172|ENSMMUG00000002241|RDX|radixin [Source:HGNC Symbol;Acc:9944]	ENSP00000384136	ENSG00000137710	RDX	radixin [Source:HGNC Symbol;Acc:9944]	ortholog_one2one				14	8	14	13	14	YES	YES	8	7	8	27.8	17.5	68.549	583	46	40	43	3.4398e-224	27.8	27.8	27.8	1168800000	335280000	493830000	339650000	31588000	9061600	13347000	9179600
513	ENSMMUP00000003000	ENSMMUP00000003000	ENSMMUT00000003179	ENSMMUG00000002244	ENSMMUP00000003000|ENSMMUT00000003179|ENSMMUG00000002244|EEA1|early endosome antigen 1 [Source:HGNC Symbol;Acc:3185]	ENSP00000317955	ENSG00000102189	EEA1	early endosome antigen 1 [Source:HGNC Symbol;Acc:3185]	ortholog_one2one				5	5	1	3	3	YES	YES	1	3	3	5.8	5.8	162.22	1409	1	6	4	3.3857e-58	1.1	3.5	3.4	35460000	2903900	20993000	11563000	319460	26161	189130	104170
514	ENSMMUP00000003002;ENSMMUP00000003003	ENSMMUP00000003002	ENSMMUT00000003181	ENSMMUG00000002247	ENSMMUP00000003002|ENSMMUT00000003181|ENSMMUG00000002247;									6	1	5	6	6	YES	YES	1	1	1	25.5	3.6	46.438	415	12	11	17	3.5961e-155	25.5	25.5	25.5	418220000	89011000	148920000	180280000	16729000	3560400	5956900	7211300
515	ENSMMUP00000003012;ENSMMUP00000032555;ENSMMUP00000003013	ENSMMUP00000003012	ENSMMUT00000003192	ENSMMUG00000002257	ENSMMUP00000003012|ENSMMUT00000003192|ENSMMUG00000002257|POLR3E|polymerase (RNA) III (DNA directed) polypeptide E (80kD) [Source:HGNC Symbol;Acc:30347];	ENSP00000299853	ENSG00000058600	POLR3E	polymerase (RNA) III (DNA directed) polypeptide E (80kD) [Source:HGNC Symbol;Acc:30347]	ortholog_one2one				2	2	2	1	1	YES	YES	2	1	1	4.1	4.1	79.433	709	5	1	1	3.8315e-08	4.1	2.1	2.1	2994900	2952400	18010	24505	73046	72009	439.26	597.69
516	ENSMMUP00000003017;ENSMMUP00000040606	ENSMMUP00000003017	ENSMMUT00000003197	ENSMMUG00000032251	ENSMMUP00000003017|ENSMMUT00000003197|ENSMMUG00000032251|FBXO44|F-box protein 44 [Source:HGNC Symbol;Acc:24847];	ENSP00000365961	ENSG00000132879	FBXO44	F-box protein 44 [Source:HGNC Symbol;Acc:24847]	ortholog_one2one				3	1	3	3	3	YES	YES	1	1	1	12.5	3.9	29.746	255	2	2	2	1.023e-25	12.5	12.5	12.5	5529300	1334100	2510300	1684900	291020	70218	132120	88680
517	ENSMMUP00000021966;ENSMMUP00000003020;ENSMMUP00000008082;ENSMMUP00000009866	ENSMMUP00000021966	ENSMMUT00000023477	ENSMMUG00000002263	ENSMMUP00000021966|ENSMMUT00000023477|ENSMMUG00000002263|ACTR2|ARP2 actin-related protein 2 homolog (yeast) [Source:HGNC Symbol;Acc:169];	ENSP00000367220	ENSG00000138071	ACTR2	ARP2 actin-related protein 2 homolog (yeast) [Source:HGNC Symbol;Acc:169]	ortholog_one2one	ENSMUSP00000048925	ENSMUSG00000058997	ortholog_one2one	12	12	10	8	11	YES	YES	10	8	11	37.3	37.3	45.274	399	71	78	69	2.8644e-210	29.6	28.8	36.8	2797600000	1026500000	1100400000	670640000	133220000	48883000	52399000	31935000
518	ENSMMUP00000003023	ENSMMUP00000003023	ENSMMUT00000003203	ENSMMUG00000002266	ENSMMUP00000003023|ENSMMUT00000003203|ENSMMUG00000002266|MPO|myeloperoxidase [Source:HGNC Symbol;Acc:7218]	ENSP00000225275	ENSG00000005381	MPO	myeloperoxidase [Source:HGNC Symbol;Acc:7218]	ortholog_one2one				3	3	1	2	3	YES	YES	1	2	3	7.5	7.5	87.238	776	2	2	3	2.4104e-13	1.7	4.4	7.5	6674200	1287300	2362800	3024100	130870	25242	46330	59296
519	ENSMMUP00000003031	ENSMMUP00000003031	ENSMMUT00000003211	ENSMMUG00000002269	ENSMMUP00000003031|ENSMMUT00000003211|ENSMMUG00000002269|SCPEP1|serine carboxypeptidase 1 [Source:HGNC Symbol;Acc:29507]	ENSP00000262288	ENSG00000121064	SCPEP1	serine carboxypeptidase 1 [Source:HGNC Symbol;Acc:29507]	ortholog_one2one				7	7	7	7	7	YES	YES	7	7	7	20.1	20.1	50.631	452	40	37	42	0	20.1	20.1	20.1	1088300000	330170000	389100000	369070000	45348000	13757000	16213000	15378000
520	ENSMMUP00000003033;ENSMMUP00000040014;ENSMMUP00000003032;ENSMMUP00000003034;ENSMMUP00000003029	ENSMMUP00000003033	ENSMMUT00000003213	ENSMMUG00000002267	ENSMMUP00000003033|ENSMMUT00000003213|ENSMMUG00000002267|LAMC3|laminin, gamma 3 [Source:HGNC Symbol;Acc:6494];	ENSP00000354360	ENSG00000050555	LAMC3	laminin, gamma 3 [Source:HGNC Symbol;Acc:6494]	ortholog_one2one				7	6	7	6	5	YES	YES	6	6	5	12.2	11.1	85.318	784	10	11	10	1.5494e-47	12.2	11.1	10.8	339810000	109670000	113050000	117090000	9708800	3133500	3229900	3345400
521	ENSMMUP00000003036;ENSMMUP00000003037	ENSMMUP00000003036	ENSMMUT00000003216	ENSMMUG00000002270	ENSMMUP00000003036|ENSMMUT00000003216|ENSMMUG00000002270|ARID1B|AT rich interactive domain 1B (SWI1-like) [Source:HGNC Symbol;Acc:18040];	ENSP00000344546	ENSG00000049618	ARID1B	AT rich interactive domain 1B (SWI1-like) [Source:HGNC Symbol;Acc:18040]	ortholog_one2one				7	6	5	4	6	YES	YES	4	3	6	6.6	5.7	234.73	2207	5	5	7	1.382e-76	5.1	3.9	5.7	61584000	15924000	17143000	28517000	724520	187340	201680	335500
522	ENSMMUP00000003041	ENSMMUP00000003041	ENSMMUT00000003221	ENSMMUG00000002272	ENSMMUP00000003041|ENSMMUT00000003221|ENSMMUG00000002272|CLINT1|clathrin interactor 1 [Source:HGNC Symbol;Acc:23186]	ENSP00000429824	ENSG00000113282	CLINT1	clathrin interactor 1 [Source:HGNC Symbol;Acc:23186]	ortholog_one2one				2	2	2	1	1	YES	YES	2	1	1	8.2	8.2	43.881	401	3	3	2	1.1215e-42	8.2	5	5	45058000	22413000	16220000	6424700	2048100	1018800	737270	292030
523	ENSMMUP00000032025;ENSMMUP00000003048;ENSMMUP00000027359	ENSMMUP00000032025	ENSMMUT00000038937	ENSMMUG00000002278	ENSMMUP00000032025|ENSMMUT00000038937|ENSMMUG00000002278|ARID3A|AT rich interactive domain 3A (BRIGHT-like) [Source:HGNC Symbol;Acc:3031];	ENSP00000263620	ENSG00000116017	ARID3A	AT rich interactive domain 3A (BRIGHT-like) [Source:HGNC Symbol;Acc:3031]	ortholog_one2one	ENSMUSP00000107850	ENSMUSG00000048120	ortholog_one2one	2	2	1	2	1	YES	YES	1	2	1	2.4	2.4	60.811	589	2	2	1	1.5142e-30	2	2.4	2	4024300	1136200	2029700	858300	138770	39181	69991	29597
524	ENSMMUP00000003056	ENSMMUP00000003056	ENSMMUT00000003236	ENSMMUG00000002285	ENSMMUP00000003056|ENSMMUT00000003236|ENSMMUG00000002285|GALNT2|UDP-N-acetyl-alpha-D-galactosamine:polypeptide N-acetylgalactosaminyltransferase 2 (GalNAc-T2) [Source:HGNC Symbol;Acc:4124]	ENSP00000355632	ENSG00000143641	GALNT2	UDP-N-acetyl-alpha-D-galactosamine:polypeptide N-acetylgalactosaminyltransferase 2 (GalNAc-T2) [Source:HGNC Symbol;Acc:4124]	ortholog_one2one				4	4	3	4	3	YES	YES	3	4	3	10.3	10.3	64.704	571	5	6	5	9.8699e-42	7.5	10.3	6.5	102830000	38046000	29611000	35177000	3024500	1119000	870900	1034600
525	ENSMMUP00000032686;ENSMMUP00000003058;ENSMMUP00000003062;ENSMMUP00000001192;ENSMMUP00000032685	ENSMMUP00000032686	ENSMMUT00000039620	ENSMMUG00000002286	ENSMMUP00000032686|ENSMMUT00000039620|ENSMMUG00000002286|CREBBP|CREB binding protein [Source:HGNC Symbol;Acc:2348];	ENSP00000262367	ENSG00000005339	CREBBP	CREB binding protein [Source:HGNC Symbol;Acc:2348]	ortholog_one2one	ENSMUSP00000028499	ENSMUSG00000027087	ortholog_one2one	3	3	2	2	3	YES	YES	2	2	3	2.4	2.4	266.46	2457	5	4	5	1.7715e-25	1.4	1.4	2.4	61147000	9225000	15229000	36693000	687040	103650	171110	412280
526	ENSMMUP00000003071	ENSMMUP00000003071	ENSMMUT00000003252	ENSMMUG00000002295	ENSMMUP00000003071|ENSMMUT00000003252|ENSMMUG00000002295|CRABP2|cellular retinoic acid binding protein 2 [Source:HGNC Symbol;Acc:2339]	ENSP00000357205	ENSG00000143320	CRABP2	cellular retinoic acid binding protein 2 [Source:HGNC Symbol;Acc:2339]	ortholog_one2one				3	3	2	3	2	YES	YES	2	3	2	28.3	28.3	15.679	138	3	4	3	5.8934e-13	13	28.3	13	47232000	16275000	24138000	6818900	3936000	1356200	2011500	568240
527	ENSMMUP00000003077;ENSMMUP00000003078	ENSMMUP00000003077	ENSMMUT00000003259	ENSMMUG00000002301	ENSMMUP00000003077|ENSMMUT00000003259|ENSMMUG00000002301|RAB11FIP5|RAB11 family interacting protein 5 (class I) [Source:HGNC Symbol;Acc:24845];	ENSP00000258098	ENSG00000135631	RAB11FIP5	RAB11 family interacting protein 5 (class I) [Source:HGNC Symbol;Acc:24845]	ortholog_one2one				2	2	1	2	1	YES	YES	1	2	1	5.2	5.2	70.255	653	3	2	2	6.7768e-08	2.5	5.2	2.5	9028200	2059800	4470700	2497800	250780	57216	124190	69383
528	ENSMMUP00000003080;ENSMMUP00000003079	ENSMMUP00000003080	ENSMMUT00000003262	ENSMMUG00000002302	ENSMMUP00000003080|ENSMMUT00000003262|ENSMMUG00000002302|STAU1|staufen, RNA binding protein, homolog 1 (Drosophila) [Source:HGNC Symbol;Acc:11370];	ENSP00000360922	ENSG00000124214	STAU1	staufen, RNA binding protein, homolog 1 (Drosophila) [Source:HGNC Symbol;Acc:11370]	ortholog_one2one				4	4	2	3	3	YES	YES	2	3	3	10	10	55.618	502	7	7	10	2.3414e-34	2.8	5.6	7.2	65861000	13717000	25717000	26427000	2058200	428650	803660	825860
529	ENSMMUP00000003096;ENSMMUP00000003097;ENSMMUP00000003098	ENSMMUP00000003096	ENSMMUT00000003279	ENSMMUG00000002317	ENSMMUP00000003096|ENSMMUT00000003279|ENSMMUG00000002317|WDR91|WD repeat domain 91 [Source:HGNC Symbol;Acc:24997];	ENSP00000346466	ENSG00000105875	WDR91	WD repeat domain 91 [Source:HGNC Symbol;Acc:24997]	ortholog_one2one				8	8	8	5	7	YES	YES	8	5	7	15.5	15.5	82.349	737	14	16	14	2.0473e-66	15.5	9.8	13.2	219680000	73117000	87633000	58928000	4992700	1661700	1991700	1339300
530	ENSMMUP00000003103;ENSMMUP00000032625	ENSMMUP00000003103	ENSMMUT00000003287	ENSMMUG00000002323	ENSMMUP00000003103|ENSMMUT00000003287|ENSMMUG00000002323|CPPED1|calcineurin-like phosphoesterase domain containing 1 [Source:HGNC Symbol;Acc:25632];	ENSP00000371193	ENSG00000103381	CPPED1	calcineurin-like phosphoesterase domain containing 1 [Source:HGNC Symbol;Acc:25632]	ortholog_one2one				4	4	3	4	2	YES	YES	3	4	2	18.2	18.2	33.116	291	9	10	6	7.6105e-51	13.1	18.2	9.6	204080000	68717000	84663000	50695000	14577000	4908300	6047400	3621100
531	ENSMMUP00000003116	ENSMMUP00000003116	ENSMMUT00000003300	ENSMMUG00000002328	ENSMMUP00000003116|ENSMMUT00000003300|ENSMMUG00000002328|PRKCSH|protein kinase C substrate 80K-H [Source:HGNC Symbol;Acc:9411]	ENSP00000252455	ENSG00000130175	PRKCSH	protein kinase C substrate 80K-H [Source:HGNC Symbol;Acc:9411]	ortholog_one2one				6	6	5	5	5	YES	YES	5	5	5	14.1	14.1	57.118	516	22	22	23	2.4708e-62	12.2	13.2	13.2	3250300000	1195100000	1142000000	913200000	171070000	62902000	60106000	48063000
532	ENSMMUP00000003122;ENSMMUP00000032754	ENSMMUP00000003122	ENSMMUT00000003306	ENSMMUG00000002332	ENSMMUP00000003122|ENSMMUT00000003306|ENSMMUG00000002332|RBM25|RNA binding motif protein 25 [Source:HGNC Symbol;Acc:23244];	ENSP00000261973	ENSG00000119707	RBM25	RNA binding motif protein 25 [Source:HGNC Symbol;Acc:23244]	ortholog_one2one				4	4	4	4	3	YES	YES	4	4	3	8.1	8.1	100.15	843	10	10	6	1.9193e-13	8.1	8.1	6.3	180580000	79765000	66023000	34796000	5016200	2215700	1834000	966550
534	ENSMMUP00000003126	ENSMMUP00000003126	ENSMMUT00000003311	ENSMMUG00000002336	ENSMMUP00000003126|ENSMMUT00000003311|ENSMMUG00000002336|PTK2|PTK2 protein tyrosine kinase 2 [Source:HGNC Symbol;Acc:9611]	ENSP00000341189	ENSG00000169398	PTK2	PTK2 protein tyrosine kinase 2 [Source:HGNC Symbol;Acc:9611]	ortholog_one2one				2	2	2	1	2	YES	YES	2	1	2	9.4	9.4	48.045	424	2	3	2	2.8216e-40	9.4	2.4	9.4	13428000	4753000	2656900	6018000	559490	198040	110700	250750
535	ENSMMUP00000003127	ENSMMUP00000003127	ENSMMUT00000003312	ENSMMUG00000002337	ENSMMUP00000003127|ENSMMUT00000003312|ENSMMUG00000002337|AQR|aquarius homolog (mouse) [Source:HGNC Symbol;Acc:29513]	ENSP00000156471	ENSG00000021776	AQR	aquarius homolog (mouse) [Source:HGNC Symbol;Acc:29513]	ortholog_one2one				16	16	14	12	14	YES	YES	14	12	14	15.1	15.1	176.06	1527	26	23	25	5.8322e-177	12.9	12	13.9	233820000	79828000	78588000	75408000	2851500	973520	958390	919610
536	ENSMMUP00000003131;ENSMMUP00000003129	ENSMMUP00000003131	ENSMMUT00000003316	ENSMMUG00000002338	ENSMMUP00000003131|ENSMMUT00000003316|ENSMMUG00000002338|HNRPLL|heterogeneous nuclear ribonucleoprotein L-like [Source:HGNC Symbol;Acc:25127]	ENSP00000387088	ENSG00000143889	HNRPLL	heterogeneous nuclear ribonucleoprotein L-like [Source:HGNC Symbol;Acc:25127]	ortholog_one2one				9	9	6	7	9	YES	YES	6	7	9	31.7	31.7	59.631	537	12	12	14	4.4576e-58	16.6	24.6	31.7	238290000	86413000	83931000	67949000	7943100	2880400	2797700	2265000
537	ENSMMUP00000003140	ENSMMUP00000003140	ENSMMUT00000003326	ENSMMUG00000002345	ENSMMUP00000003140|ENSMMUT00000003326|ENSMMUG00000002345|TMOD3|tropomodulin 3 (ubiquitous) [Source:HGNC Symbol;Acc:11873]	ENSP00000308753	ENSG00000138594	TMOD3	tropomodulin 3 (ubiquitous) [Source:HGNC Symbol;Acc:11873]	ortholog_one2one				5	5	5	3	4	YES	YES	5	3	4	24.7	24.7	39.681	352	12	7	6	5.1428e-71	24.7	14.2	19.9	173980000	76973000	52443000	44565000	7908200	3498800	2383800	2025700
538	ENSMMUP00000039875;ENSMMUP00000003146	ENSMMUP00000039875	ENSMMUT00000046846	ENSMMUG00000002350	ENSMMUP00000039875|ENSMMUT00000046846|ENSMMUG00000002350|IFI44|interferon-induced protein 44 [Source:HGNC Symbol;Acc:16938];	ENSP00000359783	ENSG00000137965	IFI44	interferon-induced protein 44 [Source:HGNC Symbol;Acc:16938]	ortholog_one2one				2	2	1	1	2	YES	YES	1	1	2	6.4	6.4	51.652	452	4	3	6	3.2255e-17	3.5	3.5	6.4	66693000	19181000	14022000	33491000	2021000	581230	424910	1014900
539	ENSMMUP00000003147	ENSMMUP00000003147	ENSMMUT00000003334	ENSMMUG00000002351	ENSMMUP00000003147|ENSMMUT00000003334|ENSMMUG00000002351|DUSP3|dual specificity phosphatase 3 [Source:HGNC Symbol;Acc:3069]	ENSP00000226004	ENSG00000108861	DUSP3	dual specificity phosphatase 3 [Source:HGNC Symbol;Acc:3069]	ortholog_one2one				3	3	2	2	3	YES	YES	2	2	3	22.7	22.7	20.478	185	4	4	5	4.6673e-86	15.7	15.7	22.7	75321000	22999000	28811000	23510000	7532100	2299900	2881100	2351000
541	ENSMMUP00000003156	ENSMMUP00000003156	ENSMMUT00000003343	ENSMMUG00000002359	ENSMMUP00000003156|ENSMMUT00000003343|ENSMMUG00000002359|MGST1|microsomal glutathione S-transferase 1 [Source:HGNC Symbol;Acc:7061]	ENSP00000379512	ENSG00000008394	MGST1	microsomal glutathione S-transferase 1 [Source:HGNC Symbol;Acc:7061]	ortholog_one2one				2	2	1	1	2	YES	YES	1	1	2	24.5	24.5	17.706	155	2	1	2	1.5442e-11	7.7	24.5	24.5	14854000	4712200	6557500	3584200	2475600	785360	1092900	597370
542	ENSMMUP00000003159;ENSMMUP00000039657	ENSMMUP00000003159	ENSMMUT00000003347	ENSMMUG00000002361	ENSMMUP00000003159|ENSMMUT00000003347|ENSMMUG00000002361;									3	3	2	2	2	YES	YES	2	2	2	5.7	5.7	120.69	1091	2	3	2	2.1422e-18	3	3.9	3.9	26908000	13686000	8945200	4277300	489240	248830	162640	77769
543	ENSMMUP00000003160	ENSMMUP00000003160	ENSMMUT00000003348	ENSMMUG00000002362	ENSMMUP00000003160|ENSMMUT00000003348|ENSMMUG00000002362|KIAA0020|KIAA0020 [Source:HGNC Symbol;Acc:29676]	ENSP00000380982	ENSG00000080608	KIAA0020	KIAA0020 [Source:HGNC Symbol;Acc:29676]	ortholog_one2one				4	4	2	1	4	YES	YES	2	1	4	9.7	9.7	62.083	547	3	2	7	3.5467e-13	6.4	3.5	9.7	50913000	16424000	13841000	20648000	1414200	456240	384470	573550
544	ENSMMUP00000003170;ENSMMUP00000003167;ENSMMUP00000003168;ENSMMUP00000003169;ENSMMUP00000035046;ENSMMUP00000003171;ENSMMUP00000035045;ENSMMUP00000003174	ENSMMUP00000003170	ENSMMUT00000003358	ENSMMUG00000002364	ENSMMUP00000003170|ENSMMUT00000003358|ENSMMUG00000002364|AKAP9|A kinase (PRKA) anchor protein (yotiao) 9 [Source:HGNC Symbol;Acc:379];	ENSP00000348573	ENSG00000127914	AKAP9	A kinase (PRKA) anchor protein (yotiao) 9 [Source:HGNC Symbol;Acc:379]	ortholog_one2one				5	5	2	4	3	YES	YES	2	4	3	2.5	2.5	452.47	3904	4	5	3	2.1105e-12	0.8	2.1	1.2	57282000	7268800	37406000	12607000	203850	25868	133120	44866
545	ENSMMUP00000003172;ENSMMUP00000003175;ENSMMUP00000038146;ENSMMUP00000003173	ENSMMUP00000003172	ENSMMUT00000003360	ENSMMUG00000002370	ENSMMUP00000003172|ENSMMUT00000003360|ENSMMUG00000002370|ITGA6|integrin, alpha 6 [Source:HGNC Symbol;Acc:6142];	ENSP00000386896	ENSG00000091409	ITGA6	integrin, alpha 6 [Source:HGNC Symbol;Acc:6142]	ortholog_one2one				15	15	11	9	12	YES	YES	11	9	12	23.5	23.5	126.64	1130	28	22	25	1.5195e-127	14.9	12.7	18.1	381930000	129210000	132970000	119740000	5456100	1845900	1899600	1710600
546	ENSMMUP00000003176	ENSMMUP00000003176	ENSMMUT00000003364	ENSMMUG00000002371	ENSMMUP00000003176|ENSMMUT00000003364|ENSMMUG00000002371|MYO1C|myosin IC [Source:HGNC Symbol;Acc:7597]	ENSP00000352834	ENSG00000197879	MYO1C	myosin IC [Source:HGNC Symbol;Acc:7597]	ortholog_one2one				22	22	20	21	20	YES	YES	20	21	20	32	32	113.19	1003	100	98	90	0	29.4	30.2	29	3017100000	1009700000	1234000000	773360000	50284000	16829000	20566000	12889000
547	ENSMMUP00000003178	ENSMMUP00000003178	ENSMMUT00000003366	ENSMMUG00000002373	ENSMMUP00000003178|ENSMMUT00000003366|ENSMMUG00000002373|INPP5K|inositol polyphosphate-5-phosphatase K [Source:HGNC Symbol;Acc:33882]	ENSP00000413937	ENSG00000132376	INPP5K	inositol polyphosphate-5-phosphatase K [Source:HGNC Symbol;Acc:33882]	ortholog_one2one				2	2	2	2	2	YES	YES	2	2	2	4.7	4.7	51.232	448	4	4	4	1.409e-08	4.7	4.7	4.7	28891000	11798000	10381000	6712400	1256100	512960	451330	291840
548	ENSMMUP00000003180	ENSMMUP00000003180	ENSMMUT00000003368	ENSMMUG00000002374	ENSMMUP00000003180|ENSMMUT00000003368|ENSMMUG00000002374|PITPNA|phosphatidylinositol transfer protein, alpha [Source:HGNC Symbol;Acc:9001]	ENSP00000316809	ENSG00000174238	PITPNA	phosphatidylinositol transfer protein, alpha [Source:HGNC Symbol;Acc:9001]	ortholog_one2one				9	9	7	7	8	YES	YES	7	7	8	40.7	40.7	31.796	270	18	15	16	4.5627e-117	28.9	31.5	37.8	473960000	200070000	156230000	117650000	18229000	7695000	6009000	4525100
549	ENSMMUP00000003189;ENSMMUP00000003188;ENSMMUP00000035438;ENSMMUP00000003190	ENSMMUP00000003189	ENSMMUT00000003377	ENSMMUG00000002380	ENSMMUP00000003189|ENSMMUT00000003377|ENSMMUG00000002380|WDR81|WD repeat domain 81 [Source:HGNC Symbol;Acc:26600];	ENSP00000386609	ENSG00000167716	WDR81	WD repeat domain 81 [Source:HGNC Symbol;Acc:26600]	ortholog_one2one				4	4	1	2	1	YES	YES	1	2	1	7.7	7.7	108.64	1010	1	2	1	1.6664e-12	1.3	4.1	2.4	9701400	2641500	6116100	943800	220490	60034	139000	21450
550	ENSMMUP00000003191	ENSMMUP00000003191	ENSMMUT00000003379	ENSMMUG00000002382	ENSMMUP00000003191|ENSMMUT00000003379|ENSMMUG00000002382|SERPINF2|serpin peptidase inhibitor, clade F (alpha-2 antiplasmin, pigment epithelium derived factor), member 2 [Source:HGNC Symbol;Acc:9075]	ENSP00000321853	ENSG00000167711	SERPINF2	serpin peptidase inhibitor, clade F (alpha-2 antiplasmin, pigment epithelium derived factor), member 2 [Source:HGNC Symbol;Acc:9075]	ortholog_one2one				8	8	8	7	7	YES	YES	8	7	7	23.4	23.4	55.161	495	45	34	35	3.9443e-161	23.4	21.4	21.4	1715500000	751360000	539680000	424500000	74589000	32668000	23464000	18457000
551	ENSMMUP00000003194	ENSMMUP00000003194	ENSMMUT00000003382	ENSMMUG00000002381	ENSMMUP00000003194|ENSMMUT00000003382|ENSMMUG00000002381|XM_001112093.1	ENSP00000222270	ENSG00000105663	WBP7	Histone-lysine N-methyltransferase MLL4 [Source:UniProtKB/Swiss-Prot;Acc:Q9UMN6]	ortholog_one2one				2	2	2	1	2	YES	YES	2	1	2	1.2	1.2	284.9	2628	3	1	2	9.8785e-08	1.2	0.6	1.2	4427300	3071000	1081600	274680	31624	21936	7725.7	1962
552	ENSMMUP00000003198;ENSMMUP00000029977;ENSMMUP00000035691	ENSMMUP00000003198	ENSMMUT00000003386	ENSMMUG00000022769	ENSMMUP00000003198|ENSMMUT00000003386|ENSMMUG00000022769|U2AF1|U2 small nuclear RNA auxiliary factor 1 [Source:HGNC Symbol;Acc:12453];	ENSP00000291552	ENSG00000160201	U2AF1	U2 small nuclear RNA auxiliary factor 1 [Source:HGNC Symbol;Acc:12453]	ortholog_one2one				7	7	6	7	6	YES	YES	6	7	6	45.8	45.8	27.882	240	22	26	23	6.276e-174	45.4	45.8	45.4	1689700000	526910000	709780000	452990000	168970000	52691000	70978000	45299000
553	ENSMMUP00000040078;ENSMMUP00000003202;ENSMMUP00000040075;ENSMMUP00000003201	ENSMMUP00000040078	ENSMMUT00000047047	ENSMMUG00000002387	ENSMMUP00000040078|ENSMMUT00000047047|ENSMMUG00000002387|LOC693720;	ENSP00000360262	ENSG00000172456	FGGY	FGGY carbohydrate kinase domain containing [Source:HGNC Symbol;Acc:25610]	ortholog_one2one				2	2	2	1	1	YES	YES	2	1	1	3.8	3.8	63.172	580	2	1	1	1.8981e-06	3.8	1.4	1.4	1476500	763450	465240	247790	47628	24627	15008	7993.2
554	ENSMMUP00000003208	ENSMMUP00000003208	ENSMMUT00000003396	ENSMMUG00000002389	ENSMMUP00000003208|ENSMMUT00000003396|ENSMMUG00000002389|HSPB6|heat shock protein, alpha-crystallin-related, B6 [Source:HGNC Symbol;Acc:26511]	ENSP00000468057	ENSG00000004776	HSPB6	heat shock protein, alpha-crystallin-related, B6 [Source:HGNC Symbol;Acc:26511]	ortholog_one2one				4	4	3	4	4	YES	YES	3	4	4	48.8	48.8	17.165	160	9	15	10	2.9296e-66	47.5	48.8	48.8	677150000	119060000	394700000	163390000	96735000	17008000	56386000	23341000
556	ENSMMUP00000003220	ENSMMUP00000003220	ENSMMUT00000003410	ENSMMUG00000002400	ENSMMUP00000003220|ENSMMUT00000003410|ENSMMUG00000002400|DEGS1|degenerative spermatocyte homolog 1, lipid desaturase (Drosophila) [Source:HGNC Symbol;Acc:13709]	ENSP00000316476	ENSG00000143753	DEGS1	delta(4)-desaturase, sphingolipid 1 [Source:HGNC Symbol;Acc:13709]	ortholog_one2one				5	5	5	5	4	YES	YES	5	5	4	16.1	16.1	38.034	323	11	9	9	4.4619e-27	16.1	16.1	11.1	287690000	100170000	100010000	87506000	23974000	8347700	8334300	7292200
557	ENSMMUP00000003227	ENSMMUP00000003227	ENSMMUT00000003417	ENSMMUG00000002407	ENSMMUP00000003227|ENSMMUT00000003417|ENSMMUG00000002407|CLEC11A|C-type lectin domain family 11, member A [Source:HGNC Symbol;Acc:10576]	ENSP00000250340	ENSG00000105472	CLEC11A	C-type lectin domain family 11, member A [Source:HGNC Symbol;Acc:10576]	ortholog_one2one				2	2	1	1	2	YES	YES	1	1	2	7.1	7.1	35.786	323	4	2	4	7.2308e-05	4.3	4.3	7.1	39775000	20215000	6775500	12784000	2093400	1064000	356600	672830
558	ENSMMUP00000003232	ENSMMUP00000003232	ENSMMUT00000003422	ENSMMUG00000002408	ENSMMUP00000003232|ENSMMUT00000003422|ENSMMUG00000002408|URGCP|upregulator of cell proliferation [Source:HGNC Symbol;Acc:30890]	ENSP00000396918	ENSG00000106608	URGCP	upregulator of cell proliferation [Source:HGNC Symbol;Acc:30890]	ortholog_one2one				5	5	3	5	4	YES	YES	3	5	4	7.6	7.6	104.22	922	5	8	5	2.3712e-20	5.1	7.6	6.4	23237000	5422000	11097000	6718000	430310	100410	205490	124410
559	ENSMMUP00000003240;ENSMMUP00000003243	ENSMMUP00000003240	ENSMMUT00000003430	ENSMMUG00000002414	ENSMMUP00000003240|ENSMMUT00000003430|ENSMMUG00000002414|NOL11|nucleolar protein 11 [Source:HGNC Symbol;Acc:24557];	ENSP00000253247	ENSG00000130935	NOL11	nucleolar protein 11 [Source:HGNC Symbol;Acc:24557]	ortholog_one2one				2	2	2	2	2	YES	YES	2	2	2	5.9	5.9	80.852	716	3	2	3	5.5884e-08	5.9	5.9	5.9	21430000	8184800	4768300	8476600	465860	177930	103660	184270
560	ENSMMUP00000003241;ENSMMUP00000003244	ENSMMUP00000003241	ENSMMUT00000003431	ENSMMUG00000002416	ENSMMUP00000003241|ENSMMUT00000003431|ENSMMUG00000002416|CLIC4;	ENSP00000363500	ENSG00000169504	CLIC4	chloride intracellular channel 4 [Source:HGNC Symbol;Acc:13518]	ortholog_one2one				10	10	9	9	9	YES	YES	9	9	9	55.7	55.7	28.758	253	27	25	25	5.0483e-186	50.6	55.7	50.6	1896800000	604250000	789620000	502930000	111580000	35544000	46448000	29584000
561	ENSMMUP00000003252	ENSMMUP00000003252	ENSMMUT00000003442	ENSMMUG00000002422	ENSMMUP00000003252|ENSMMUT00000003442|ENSMMUG00000002422|AEBP1|AE binding protein 1 [Source:HGNC Symbol;Acc:303]	ENSP00000223357	ENSG00000106624	AEBP1	AE binding protein 1 [Source:HGNC Symbol;Acc:303]	ortholog_one2one				5	5	4	5	4	YES	YES	4	5	4	5.8	5.8	129.98	1156	13	14	8	1.4678e-80	4.7	5.8	4.7	322170000	114410000	123360000	84401000	5857700	2080100	2243000	1534600
562	ENSMMUP00000003257;ENSMMUP00000003255	ENSMMUP00000003257	ENSMMUT00000003447	ENSMMUG00000002424	ENSMMUP00000003257|ENSMMUT00000003447|ENSMMUG00000002424|FBLN1|fibulin 1 [Source:HGNC Symbol;Acc:3600];	ENSP00000331544	ENSG00000077942	FBLN1	fibulin 1 [Source:HGNC Symbol;Acc:3600]	ortholog_one2one				10	7	7	7	9	YES	YES	5	5	7	22.2	14.5	76.918	703	26	20	29	3.4005e-148	18.8	17.2	19.2	1854900000	755790000	655830000	443290000	52997000	21594000	18738000	12665000
563	ENSMMUP00000003264	ENSMMUP00000003264	ENSMMUT00000003454	ENSMMUG00000002429	ENSMMUP00000003264|ENSMMUT00000003454|ENSMMUG00000002429|CAT|catalase [Source:HGNC Symbol;Acc:1516]	ENSP00000241052	ENSG00000121691	CAT	catalase [Source:HGNC Symbol;Acc:1516]	ortholog_one2one				14	14	13	12	13	YES	YES	13	12	13	45.9	45.9	59.942	527	104	93	97	0	42.3	42.3	43.1	7648600000	2508000000	2804500000	2336100000	246730000	80902000	90467000	75359000
564	ENSMMUP00000003265;ENSMMUP00000025419;ENSMMUP00000033294	ENSMMUP00000003265	ENSMMUT00000003455	ENSMMUG00000002430	ENSMMUP00000003265|ENSMMUT00000003455|ENSMMUG00000002430|YKT6|YKT6 v-SNARE homolog (S. cerevisiae) [Source:HGNC Symbol;Acc:16959]	ENSP00000223369	ENSG00000106636	YKT6	YKT6 v-SNARE homolog (S. cerevisiae) [Source:HGNC Symbol;Acc:16959]	ortholog_one2one				3	3	3	3	3	YES	YES	3	3	3	22.2	22.2	22.417	198	9	10	5	3.7024e-27	22.2	22.2	22.2	1036300000	586380000	391380000	58572000	74023000	41884000	27955000	4183700
565	ENSMMUP00000028184;ENSMMUP00000028186;ENSMMUP00000028185;ENSMMUP00000003275;ENSMMUP00000028183;ENSMMUP00000003272;ENSMMUP00000003276;ENSMMUP00000003278;ENSMMUP00000003280;ENSMMUP00000003282;ENSMMUP00000003283;ENSMMUP00000003284;ENSMMUP00000035857	ENSMMUP00000028184	ENSMMUT00000030116	ENSMMUG00000021393	ENSMMUP00000028184|ENSMMUT00000030116|ENSMMUG00000021393|LOC721612;	ENSP00000319060	ENSG00000148660	CAMK2G	calcium/calmodulin-dependent protein kinase II gamma [Source:HGNC Symbol;Acc:1463]	ortholog_one2one	ENSMUSP00000026416	ENSMUSG00000025358	ortholog_one2one	7	5	5	4	6	YES	YES	3	2	4	22.5	16.9	62.18	556	4	2	6	1.654e-60	18.5	11.7	19.4	59627000	24703000	15308000	19616000	1987600	823440	510270	653880
567	ENSMMUP00000003291	ENSMMUP00000003291	ENSMMUT00000003482	ENSMMUG00000002442	ENSMMUP00000003291|ENSMMUT00000003482|ENSMMUG00000002442									3	2	2	2	3	YES	YES	1	2	2	14.2	6.4	30.185	267	11	11	10	9.1418e-78	14.2	6.4	14.2	287330000	115470000	93713000	78146000	17958000	7217000	5857100	4884100
568	ENSMMUP00000003295	ENSMMUP00000003295	ENSMMUT00000003486	ENSMMUG00000002445	ENSMMUP00000003295|ENSMMUT00000003486|ENSMMUG00000002445|RPL11|ribosomal protein L11 [Source:HGNC Symbol;Acc:10301]									3	3	1	2	2	YES	YES	1	2	2	30.5	30.5	19.024	167	2	3	5	2.5282e-37	8.4	16.8	22.2	354620000	104520000	146390000	103710000	39402000	11613000	16265000	11523000
569	ENSMMUP00000003305;ENSMMUP00000018420	ENSMMUP00000003305	ENSMMUT00000003496	ENSMMUG00000002451	ENSMMUP00000003305|ENSMMUT00000003496|ENSMMUG00000002451|CUL7|cullin 7 [Source:HGNC Symbol;Acc:21024]	ENSP00000438788	ENSG00000044090	CUL7	cullin 7 [Source:HGNC Symbol;Acc:21024]	ortholog_one2one				6	5	3	4	5	YES	YES	2	4	4	4.5	4	191.27	1697	6	7	7	1.0302e-16	2.5	4	4	46521000	21706000	16262000	8553600	534720	249490	186910	98317
570	ENSMMUP00000003310	ENSMMUP00000003310	ENSMMUT00000003501	ENSMMUG00000002458	ENSMMUP00000003310|ENSMMUT00000003501|ENSMMUG00000002458|MUT|methylmalonyl CoA mutase [Source:HGNC Symbol;Acc:7526]	ENSP00000274813	ENSG00000146085	MUT	methylmalonyl CoA mutase [Source:HGNC Symbol;Acc:7526]	ortholog_one2one				11	11	7	8	9	YES	YES	7	8	9	21.1	21.1	83.095	750	13	20	19	2.8627e-110	17.2	16	18	319590000	85313000	127700000	106580000	8194600	2187500	3274200	2732900
572	ENSMMUP00000003320;ENSMMUP00000023959;ENSMMUP00000019644	ENSMMUP00000003320	ENSMMUT00000003511	ENSMMUG00000002468	ENSMMUP00000003320|ENSMMUT00000003511|ENSMMUG00000002468|KRT5|keratin 5 [Source:HGNC Symbol;Acc:6442];	ENSP00000252242	ENSG00000186081	KRT5	keratin 5 [Source:HGNC Symbol;Acc:6442]	ortholog_one2one				2	1	2	1	2	YES	YES	1	0	1	4	2	62.605	593	3	3	3	7.6852e-50	4	2	4	40740000	7844000	22517000	10379000	1164000	224120	643350	296540
573	ENSMMUP00000003322;ENSMMUP00000036014;ENSMMUP00000036016;ENSMMUP00000003324	ENSMMUP00000003322	ENSMMUT00000003513	ENSMMUG00000002469	ENSMMUP00000003322|ENSMMUT00000003513|ENSMMUG00000002469|CUL2;	ENSP00000444856	ENSG00000108094	CUL2	cullin 2 [Source:HGNC Symbol;Acc:2552]	ortholog_one2one				13	13	11	10	11	YES	YES	11	10	11	25.6	25.6	86.982	745	26	22	23	3.1587e-95	21.6	20.1	22	405340000	135380000	115260000	154700000	8444600	2820400	2401200	3223000
574	ENSMMUP00000003323	ENSMMUP00000003323	ENSMMUT00000003514	ENSMMUG00000002471	ENSMMUP00000003323|ENSMMUT00000003514|ENSMMUG00000002471|APOC2|apolipoprotein C-II [Source:HGNC Symbol;Acc:609]	ENSP00000466775	ENSG00000234906	APOC2	apolipoprotein C-II [Source:HGNC Symbol;Acc:609]	ortholog_one2one				3	3	3	3	3	YES	YES	3	3	3	36.6	36.6	11.161	101	18	15	11	9.6792e-66	36.6	36.6	36.6	350350000	155870000	134280000	60195000	116780000	51957000	44761000	20065000
575	ENSMMUP00000003325;ENSMMUP00000003326	ENSMMUP00000003325	ENSMMUT00000003516	ENSMMUG00000002472	ENSMMUP00000003325|ENSMMUT00000003516|ENSMMUG00000002472|CLPTM1|cleft lip and palate associated transmembrane protein 1 [Source:HGNC Symbol;Acc:2087];	ENSP00000336994	ENSG00000104853	CLPTM1	cleft lip and palate associated transmembrane protein 1 [Source:HGNC Symbol;Acc:2087]	ortholog_one2one				3	3	3	2	2	YES	YES	3	2	2	9.1	9.1	79.526	700	7	5	4	7.8229e-76	9.1	4.6	4.6	53851000	21090000	20493000	12268000	1923300	753220	731890	438150
576	ENSMMUP00000003339	ENSMMUP00000003339	ENSMMUT00000003531	ENSMMUG00000002483	ENSMMUP00000003339|ENSMMUT00000003531|ENSMMUG00000002483|CS|citrate synthase [Source:HGNC Symbol;Acc:2422]	ENSP00000342056	ENSG00000062485	CS	citrate synthase [Source:HGNC Symbol;Acc:2422]	ortholog_one2one				10	10	8	10	8	YES	YES	8	10	8	34.8	34.8	51.698	466	37	45	33	1.0318e-228	29.8	34.8	29.8	1544900000	521710000	570490000	452730000	77247000	26086000	28524000	22637000
577	ENSMMUP00000003355;ENSMMUP00000037596	ENSMMUP00000003355	ENSMMUT00000003550	ENSMMUG00000002494	ENSMMUP00000003355|ENSMMUT00000003550|ENSMMUG00000002494|XM_001109603.1									9	3	9	8	9	YES	YES	3	2	3	9.8	2.7	103.29	901	3	2	3	8.7988e-168	9.8	9.7	9.8	10813000	3802900	5229000	1781400	177270	62342	85722	29203
579	ENSMMUP00000003379;ENSMMUP00000003380;ENSMMUP00000003381;ENSMMUP00000003382;ENSMMUP00000039973	ENSMMUP00000003379	ENSMMUT00000003575	ENSMMUG00000002515	ENSMMUP00000003379|ENSMMUT00000003575|ENSMMUG00000002515|PPP2R4|protein phosphatase 2A activator, regulatory subunit 4 [Source:HGNC Symbol;Acc:9308];	ENSP00000377036	ENSG00000119383	PPP2R4	protein phosphatase 2A activator, regulatory subunit 4 [Source:HGNC Symbol;Acc:9308]	ortholog_one2one				7	7	7	6	5	YES	YES	7	6	5	31.1	31.1	40.247	357	17	16	16	6.7857e-73	31.1	27.2	24.4	670840000	226650000	206880000	237300000	31945000	10793000	9851400	11300000
580	ENSMMUP00000003388	ENSMMUP00000003388	ENSMMUT00000003584	ENSMMUG00000002519	ENSMMUP00000003388|ENSMMUT00000003584|ENSMMUG00000002519|STK11IP|serine/threonine kinase 11 interacting protein [Source:HGNC Symbol;Acc:19184]	ENSP00000295641	ENSG00000144589	STK11IP	serine/threonine kinase 11 interacting protein [Source:HGNC Symbol;Acc:19184]	ortholog_one2one				2	2	2	2	1	YES	YES	2	2	1	2.6	2.6	120.68	1092	2	3	2	5.613e-07	2.6	2.6	1.4	3756100	973790	1804500	977760	69557	18033	33417	18107
581	ENSMMUP00000036615;ENSMMUP00000036614;ENSMMUP00000015118;ENSMMUP00000003391	ENSMMUP00000036615	ENSMMUT00000043619	ENSMMUG00000002521	ENSMMUP00000036615|ENSMMUT00000043619|ENSMMUG00000002521|STRN|striatin, calmodulin binding protein [Source:HGNC Symbol;Acc:11424];	ENSP00000263918	ENSG00000115808	STRN	striatin, calmodulin binding protein [Source:HGNC Symbol;Acc:11424]	ortholog_one2one				7	7	4	6	7	YES	YES	4	6	7	18.9	18.9	85.949	783	7	10	17	2.4595e-40	9.2	13.5	18.9	313360000	110460000	87892000	115000000	8469100	2985500	2375500	3108100
582	ENSMMUP00000003400;ENSMMUP00000003401;ENSMMUP00000038195	ENSMMUP00000003400	ENSMMUT00000003596	ENSMMUG00000002528	ENSMMUP00000003400|ENSMMUT00000003596|ENSMMUG00000002528|Q3YAI1_MACMU|Ligatin Fragment [Source:UniProtKB/TrEMBL;Acc:Q3YAI1];	ENSP00000271764	ENSG00000143486	EIF2D	eukaryotic translation initiation factor 2D [Source:HGNC Symbol;Acc:6583]	ortholog_one2one				7	7	6	4	5	YES	YES	6	4	5	21.6	21.6	64.498	584	25	18	26	9.0238e-206	18.2	10.4	13.9	235410000	87476000	82075000	65856000	7356500	2733600	2564900	2058000
583	ENSMMUP00000003402;ENSMMUP00000037349	ENSMMUP00000003402	ENSMMUT00000003598	ENSMMUG00000002529	ENSMMUP00000003402|ENSMMUT00000003598|ENSMMUG00000002529|CECR1|cat eye syndrome chromosome region, candidate 1 [Source:HGNC Symbol;Acc:1839];	ENSP00000382733	ENSG00000093072	CECR1	cat eye syndrome chromosome region, candidate 1 [Source:HGNC Symbol;Acc:1839]	ortholog_one2one				6	6	3	2	3	YES	YES	3	2	3	20.2	20.2	58.444	509	3	3	5	9.8852e-16	7.5	7.1	11.4	49276000	17695000	2924100	28657000	1368800	491520	81225	796030
584	ENSMMUP00000003403;ENSMMUP00000003406	ENSMMUP00000003403	ENSMMUT00000003599	ENSMMUG00000002523	ENSMMUP00000003403|ENSMMUT00000003599|ENSMMUG00000002523|LOC720820;	ENSP00000268712	ENSG00000141027	NCOR1	nuclear receptor corepressor 1 [Source:HGNC Symbol;Acc:7672]	ortholog_one2one				3	3	2	3	1	YES	YES	2	3	1	3.4	3.4	242.73	2176	2	4	2	1.0165e-22	2.2	3.4	0.7	6569500	1499700	4144300	925460	46925	10712	29602	6610.5
585	ENSMMUP00000032886;ENSMMUP00000003420;ENSMMUP00000032885;ENSMMUP00000003418	ENSMMUP00000032886	ENSMMUT00000039825	ENSMMUG00000002540	ENSMMUP00000032886|ENSMMUT00000039825|ENSMMUG00000002540|DHRS7|dehydrogenase/reductase (SDR family) member 7 [Source:HGNC Symbol;Acc:21524];	ENSP00000216500	ENSG00000100612	DHRS7	dehydrogenase/reductase (SDR family) member 7 [Source:HGNC Symbol;Acc:21524]	ortholog_one2one	ENSMUSP00000066777	ENSMUSG00000052316	ortholog_one2one	8	8	6	6	6	YES	YES	6	6	6	31.6	31.6	42.227	374	14	14	14	1.912e-131	24.3	24.9	24.3	733240000	244220000	259990000	229020000	34916000	11630000	12381000	10906000
586	ENSMMUP00000003421;ENSMMUP00000037073;ENSMMUP00000037074;ENSMMUP00000003422	ENSMMUP00000003421	ENSMMUT00000003617	ENSMMUG00000002539	ENSMMUP00000003421|ENSMMUT00000003617|ENSMMUG00000002539|LOC720571;	ENSP00000335595	ENSG00000176148	TCP11L1	t-complex 11, testis-specific-like 1 [Source:HGNC Symbol;Acc:25655]	ortholog_one2one				8	8	6	5	4	YES	YES	6	5	4	22.2	22.2	56.945	509	9	11	8	1.1783e-38	15.5	13.6	10.4	52508000	23682000	16728000	12098000	1591200	717640	506920	366590
587	ENSMMUP00000003424;ENSMMUP00000003423	ENSMMUP00000003424	ENSMMUT00000003620	ENSMMUG00000002543	ENSMMUP00000003424|ENSMMUT00000003620|ENSMMUG00000002543|ARCN1|archain 1 [Source:HGNC Symbol;Acc:649];	ENSP00000264028	ENSG00000095139	ARCN1	archain 1 [Source:HGNC Symbol;Acc:649]	ortholog_one2one				12	12	11	8	9	YES	YES	11	8	9	27.9	27.9	61.58	552	32	24	29	2.8773e-207	24.3	14.5	23.9	785380000	238060000	257230000	290080000	23799000	7213900	7794900	8790400
588	ENSMMUP00000003425	ENSMMUP00000003425	ENSMMUT00000003621	ENSMMUG00000002542	ENSMMUP00000003425|ENSMMUT00000003621|ENSMMUG00000002542|CSTF3|cleavage stimulation factor, 3 pre-RNA, subunit 3, 77kDa [Source:HGNC Symbol;Acc:2485]	ENSP00000315791	ENSG00000176102	CSTF3	cleavage stimulation factor, 3' pre-RNA, subunit 3, 77kDa [Source:HGNC Symbol;Acc:2485]	ortholog_one2one				8	8	3	6	6	YES	YES	3	6	6	16.2	16.2	82.921	717	9	11	10	5.5894e-263	4.6	10	14.1	135460000	31989000	64502000	38964000	3386400	799720	1612600	974110
589	ENSMMUP00000003431;ENSMMUP00000003430;ENSMMUP00000003432;ENSMMUP00000036665	ENSMMUP00000003431	ENSMMUT00000003628	ENSMMUG00000002544	ENSMMUP00000003431|ENSMMUT00000003628|ENSMMUG00000002544|PHLDB1|pleckstrin homology-like domain, family B, member 1 [Source:HGNC Symbol;Acc:23697];	ENSP00000354498	ENSG00000019144	PHLDB1	pleckstrin homology-like domain, family B, member 1 [Source:HGNC Symbol;Acc:23697]	ortholog_one2one				2	1	2	2	2	YES	YES	1	1	1	1.8	1.4	150.7	1374	5	6	5	3.0809e-42	1.8	1.8	1.8	18168000	3480100	9344600	5343700	221570	42440	113960	65167
590	ENSMMUP00000003448	ENSMMUP00000003448	ENSMMUT00000003648	ENSMMUG00000002566	ENSMMUP00000003448|ENSMMUT00000003648|ENSMMUG00000002566|NP_001152973.1|selenoprotein H [Source:RefSeq peptide;Acc:NP_001152973]	ENSP00000373509	ENSG00000211450	C11orf31	chromosome 11 open reading frame 31 [Source:HGNC Symbol;Acc:18251]	ortholog_one2one				5	5	4	3	5	YES	YES	4	3	5	61.8	61.8	8.4847	76	10	6	12	6.2325e-25	61.8	59.2	61.8	227650000	108960000	49082000	69614000	45530000	21791000	9816400	13923000
591	ENSMMUP00000003453;ENSMMUP00000003457;ENSMMUP00000003458;ENSMMUP00000003455	ENSMMUP00000003453	ENSMMUT00000003654	ENSMMUG00000002569	ENSMMUP00000003453|ENSMMUT00000003654|ENSMMUG00000002569|PML|promyelocytic leukemia [Source:HGNC Symbol;Acc:9113]	ENSP00000268058	ENSG00000140464	PML	promyelocytic leukemia [Source:HGNC Symbol;Acc:9113]	ortholog_one2one				5	5	5	3	4	YES	YES	5	3	4	10.5	10.5	97.758	883	7	6	6	2.82e-30	10.5	7.7	6.7	171240000	58719000	59661000	52861000	3643400	1249300	1269400	1124700
592	ENSMMUP00000003468	ENSMMUP00000003468	ENSMMUT00000003670	ENSMMUG00000031475	ENSMMUP00000003468|ENSMMUT00000003670|ENSMMUG00000031475|HIST1H2BA|histone cluster 1, H2ba [Source:HGNC Symbol;Acc:18730]	ENSP00000274764	ENSG00000146047	HIST1H2BA	histone cluster 1, H2ba [Source:HGNC Symbol;Acc:18730]	ortholog_one2one				2	1	1	2	2	YES	YES	0	1	1	18.9	11.8	14.208	127		2	1	1.0063e-06	7.1	18.9	18.9	2613100	0	1995000	618070	237550	0	181360	56188
594	ENSMMUP00000003488	ENSMMUP00000003488	ENSMMUT00000003694	ENSMMUG00000002594	ENSMMUP00000003488|ENSMMUT00000003694|ENSMMUG00000002594|DEPDC6|DEP domain containing 6 [Source:HGNC Symbol;Acc:22953]	ENSP00000286234	ENSG00000155792	DEPTOR	DEP domain containing MTOR-interacting protein [Source:HGNC Symbol;Acc:22953]	ortholog_one2one				2	2	2	2	2	YES	YES	2	2	2	5.6	5.6	46.337	409	5	3	4	5.2437e-68	5.6	5.6	5.6	24094000	9603500	8550300	5940500	1003900	400140	356260	247520
595	ENSMMUP00000003491;ENSMMUP00000003490;ENSMMUP00000003493	ENSMMUP00000003491	ENSMMUT00000003697	ENSMMUG00000002595	ENSMMUP00000003491|ENSMMUT00000003697|ENSMMUG00000002595|COL14A1|collagen, type XIV, alpha 1 [Source:HGNC Symbol;Acc:2191];	ENSP00000297848	ENSG00000187955	COL14A1	collagen, type XIV, alpha 1 [Source:HGNC Symbol;Acc:2191]	ortholog_one2one				47	47	44	44	41	YES	YES	44	44	41	38.3	38.3	193.67	1798	550	544	532	0	37.2	37.7	34.5	55129000000	17458000000	21145000000	16526000000	633670000	200670000	243040000	189960000
596	ENSMMUP00000003494	ENSMMUP00000003494	ENSMMUT00000003700	ENSMMUG00000002599	ENSMMUP00000003494|ENSMMUT00000003700|ENSMMUG00000002599|MRPL13|mitochondrial ribosomal protein L13 [Source:HGNC Symbol;Acc:14278]	ENSP00000306548	ENSG00000172172	MRPL13	mitochondrial ribosomal protein L13 [Source:HGNC Symbol;Acc:14278]	ortholog_one2one				5	5	4	4	4	YES	YES	4	4	4	32	32	20.63	178	6	5	6	1.9488e-18	27.5	27.5	26.4	77334000	29576000	21435000	26323000	4833400	1848500	1339700	1645200
597	ENSMMUP00000003504	ENSMMUP00000003504	ENSMMUT00000003710	ENSMMUG00000002607	ENSMMUP00000003504|ENSMMUT00000003710|ENSMMUG00000002607|SNTB1|syntrophin, beta 1 (dystrophin-associated protein A1, 59kDa, basic component 1) [Source:HGNC Symbol;Acc:11168]	ENSP00000378965	ENSG00000172164	SNTB1	syntrophin, beta 1 (dystrophin-associated protein A1, 59kDa, basic component 1) [Source:HGNC Symbol;Acc:11168]	ortholog_one2one				5	1	5	4	5	YES	YES	1	1	1	18.8	2.4	40.321	377	10	8	10	4.4598e-53	18.8	15.6	18.8	183290000	103630000	34233000	45430000	7637300	4318000	1426400	1892900
598	ENSMMUP00000003508	ENSMMUP00000003508	ENSMMUT00000003714	ENSMMUG00000002612	ENSMMUP00000003508|ENSMMUT00000003714|ENSMMUG00000002612|SOD3|superoxide dismutase 3, extracellular [Source:HGNC Symbol;Acc:11181]	ENSP00000371554	ENSG00000109610	SOD3	superoxide dismutase 3, extracellular [Source:HGNC Symbol;Acc:11181]	ortholog_one2one				4	4	4	3	3	YES	YES	4	3	3	28.3	28.3	25.759	240	18	17	20	1.5968e-218	28.3	23.8	23.8	1713700000	606010000	434890000	672750000	131820000	46616000	33453000	51750000
601	ENSMMUP00000003528	ENSMMUP00000003528	ENSMMUT00000003734	ENSMMUG00000002623	ENSMMUP00000003528|ENSMMUT00000003734|ENSMMUG00000002623|APOA1BP|apolipoprotein A-I binding protein [Source:HGNC Symbol;Acc:18453]	ENSP00000357218	ENSG00000163382	APOA1BP	apolipoprotein A-I binding protein [Source:HGNC Symbol;Acc:18453]	ortholog_one2one				3	3	3	3	2	YES	YES	3	3	2	11	11	26.77	246	13	11	11	5.7067e-12	11	11	9.3	822030000	312980000	250750000	258290000	63233000	24076000	19289000	19869000
602	ENSMMUP00000003532	ENSMMUP00000003532	ENSMMUT00000003738	ENSMMUG00000002628	ENSMMUP00000003532|ENSMMUT00000003738|ENSMMUG00000002628|IMPA1|inositol(myo)-1(or 4)-monophosphatase 1 [Source:HGNC Symbol;Acc:6050]	ENSP00000408526	ENSG00000133731	IMPA1	inositol(myo)-1(or 4)-monophosphatase 1 [Source:HGNC Symbol;Acc:6050]	ortholog_one2one				2	2	2	2	2	YES	YES	2	2	2	11.9	11.9	30.27	277	6	5	5	1.0049e-16	11.9	11.9	11.9	189850000	61371000	62330000	66147000	11168000	3610100	3666500	3891000
605	ENSMMUP00000032024;ENSMMUP00000003556	ENSMMUP00000032024	ENSMMUT00000038936	ENSMMUG00000002638	ENSMMUP00000032024|ENSMMUT00000038936|ENSMMUG00000002638|WDR18|WD repeat domain 18 [Source:HGNC Symbol;Acc:17956];	ENSP00000251289	ENSG00000065268	WDR18	WD repeat domain 18 [Source:HGNC Symbol;Acc:17956]	ortholog_one2one	ENSMUSP00000107850	ENSMUSG00000048120	ortholog_one2one	4	4	4	3	2	YES	YES	4	3	2	15	15	47.065	432	6	4	6	9.6349e-15	15	9.5	7.6	34027000	15181000	10432000	8414200	1620300	722880	496780	400680
606	ENSMMUP00000003567	ENSMMUP00000003567	ENSMMUT00000003775	ENSMMUG00000002650	ENSMMUP00000003567|ENSMMUT00000003775|ENSMMUG00000002650|TMED4|transmembrane emp24 protein transport domain containing 4 [Source:HGNC Symbol;Acc:22301]	ENSP00000404042	ENSG00000158604	TMED4	transmembrane emp24 protein transport domain containing 4 [Source:HGNC Symbol;Acc:22301]	ortholog_one2one				2	2	2	2	1	YES	YES	2	2	1	16.3	16.3	26.114	227	3	3	4	1.4976e-13	16.3	16.3	8.8	161060000	49657000	26647000	84757000	10737000	3310500	1776500	5650400
607	ENSMMUP00000003569	ENSMMUP00000003569	ENSMMUT00000003777	ENSMMUG00000002651	ENSMMUP00000003569|ENSMMUT00000003777|ENSMMUG00000002651|OGDH|oxoglutarate (alpha-ketoglutarate) dehydrogenase (lipoamide) [Source:HGNC Symbol;Acc:8124]	ENSP00000222673	ENSG00000105953	OGDH	oxoglutarate (alpha-ketoglutarate) dehydrogenase (lipoamide) [Source:HGNC Symbol;Acc:8124]	ortholog_one2one				26	22	22	21	20	YES	YES	18	18	17	37.2	34.7	115.89	1023	96	86	87	0	33.4	33.1	29.4	3666500000	1081600000	1495800000	1089100000	73330000	21632000	29915000	21783000
608	ENSMMUP00000003573;ENSMMUP00000033680	ENSMMUP00000003573	ENSMMUT00000003781	ENSMMUG00000002653	ENSMMUP00000003573|ENSMMUT00000003781|ENSMMUG00000002653|HK3;	ENSP00000292432	ENSG00000160883	HK3	hexokinase 3 (white cell) [Source:HGNC Symbol;Acc:4925]	ortholog_one2one				16	14	12	14	11	YES	YES	10	12	9	28.3	25.5	98.938	923	40	48	48	0	20.5	24.4	19.9	1554100000	525230000	583810000	445020000	37001000	12506000	13900000	10596000
609	ENSMMUP00000003578;ENSMMUP00000003576	ENSMMUP00000003578	ENSMMUT00000003786	ENSMMUG00000002656	ENSMMUP00000003578|ENSMMUT00000003786|ENSMMUG00000002656|TCF20|transcription factor 20 (AR1) [Source:HGNC Symbol;Acc:11631]	ENSP00000352463	ENSG00000100207	TCF20	transcription factor 20 (AR1) [Source:HGNC Symbol;Acc:11631]	ortholog_one2one				5	5	2	2	3	YES	YES	2	2	3	4.1	4.1	211.95	1960	2	2	6	1.0186e-14	1.5	1.4	2.8	43443000	35979000	2353400	5111200	409840	339420	22202	48219
610	ENSMMUP00000003585;ENSMMUP00000036446;ENSMMUP00000038937;ENSMMUP00000038778	ENSMMUP00000003585	ENSMMUT00000003793	ENSMMUG00000023399	ENSMMUP00000003585|ENSMMUT00000003793|ENSMMUG00000023399|HMGB1|high-mobility group box 1 [Source:HGNC Symbol;Acc:4983];									6	5	6	5	6	YES	YES	5	4	5	28.1	23.6	31.807	263	34	31	27	4.9728e-162	28.1	22.4	28.1	2209200000	1269100000	587650000	352460000	157800000	90646000	41975000	25176000
612	ENSMMUP00000003600;ENSMMUP00000036393	ENSMMUP00000003600	ENSMMUT00000003809	ENSMMUG00000002675	ENSMMUP00000003600|ENSMMUT00000003809|ENSMMUG00000002675|CAPG;	ENSP00000263867	ENSG00000042493	CAPG	capping protein (actin filament), gelsolin-like [Source:HGNC Symbol;Acc:1474]	ortholog_one2one				10	10	8	10	7	YES	YES	8	10	7	49.1	49.1	38.533	348	47	44	43	2.1338e-194	42	49.1	35.6	5931300000	1842300000	2381200000	1707700000	348900000	108370000	140070000	100460000
614	ENSMMUP00000003608;ENSMMUP00000032006;ENSMMUP00000034961;ENSMMUP00000039235;ENSMMUP00000038230;ENSMMUP00000034797;ENSMMUP00000034799	ENSMMUP00000003608	ENSMMUT00000003817	ENSMMUG00000002679	ENSMMUP00000003608|ENSMMUT00000003817|ENSMMUG00000002679|LDHB;									13	2	12	11	9	YES	YES	2	2	2	41.3	5.7	36.638	334	79	78	73	0	35.3	37.1	29.6	7974900000	2553400000	3167000000	2254500000	379760000	121590000	150810000	107360000
616	ENSMMUP00000003615	ENSMMUP00000003615	ENSMMUT00000003824	ENSMMUG00000002685	ENSMMUP00000003615|ENSMMUT00000003824|ENSMMUG00000002685|B6F0M9_MACMU|NADH dehydrogenase (Ubiquinone) 1 beta subcomplex, 6, 17kDa Fragment [Source:UniProtKB/TrEMBL;Acc:B6F0M9]	ENSP00000369176	ENSG00000165264	NDUFB6	NADH dehydrogenase (ubiquinone) 1 beta subcomplex, 6, 17kDa [Source:HGNC Symbol;Acc:7701]	ortholog_one2one				2	2	2	2	1	YES	YES	2	2	1	21.1	21.1	15.4	128	6	7	4	2.0483e-11	21.1	21.1	15.6	127990000	37922000	67459000	22612000	12799000	3792200	6745900	2261200
617	ENSMMUP00000003622;ENSMMUP00000037305	ENSMMUP00000003622	ENSMMUT00000003832	ENSMMUG00000002691	ENSMMUP00000003622|ENSMMUT00000003832|ENSMMUG00000002691|DDB1|damage-specific DNA binding protein 1, 127kDa [Source:HGNC Symbol;Acc:2717];	ENSP00000301764	ENSG00000167986	DDB1	damage-specific DNA binding protein 1, 127kDa [Source:HGNC Symbol;Acc:2717]	ortholog_one2one				24	24	22	21	20	YES	YES	22	21	20	26.4	26.4	123.92	1113	81	69	70	1.2973e-233	23.5	22.6	19.9	2222200000	774410000	798730000	649010000	39681000	13829000	14263000	11590000
618	ENSMMUP00000003624	ENSMMUP00000003624	ENSMMUT00000003834	ENSMMUG00000002692	ENSMMUP00000003624|ENSMMUT00000003834|ENSMMUG00000002692|DAK|dihydroxyacetone kinase 2 homolog (S. cerevisiae) [Source:HGNC Symbol;Acc:24552]	ENSP00000378360	ENSG00000149476	DAK	dihydroxyacetone kinase 2 homolog (S. cerevisiae) [Source:HGNC Symbol;Acc:24552]	ortholog_one2one				5	5	5	5	5	YES	YES	5	5	5	20.5	20.5	42.808	414	19	17	17	2.4549e-91	20.5	20.5	20.5	241730000	69932000	71231000	100570000	10510000	3040500	3097000	4372600
619	ENSMMUP00000003625	ENSMMUP00000003625	ENSMMUT00000003835	ENSMMUG00000002694	ENSMMUP00000003625|ENSMMUT00000003835|ENSMMUG00000002694|KRTDAP|keratinocyte differentiation-associated protein [Source:HGNC Symbol;Acc:16313]	ENSP00000339251	ENSG00000188508	KRTDAP	keratinocyte differentiation-associated protein [Source:HGNC Symbol;Acc:16313]	ortholog_one2one				2	2	1	2	1	YES	YES	1	2	1	16.2	16.2	11.04	99	1	2	1	3.5347e-06	15.2	16.2	16.2	2802500	521720	1924400	356360	700620	130430	481090	89091
620	ENSMMUP00000003628	ENSMMUP00000003628	ENSMMUT00000003838	ENSMMUG00000002696	ENSMMUP00000003628|ENSMMUT00000003838|ENSMMUG00000002696|GATAD2B|GATA zinc finger domain containing 2B [Source:HGNC Symbol;Acc:30778]	ENSP00000357644	ENSG00000143614	GATAD2B	GATA zinc finger domain containing 2B [Source:HGNC Symbol;Acc:30778]	ortholog_one2one				2	2	1	1	1	YES	YES	1	1	1	6.7	6.7	65.406	594	1	1	1	3.1896e-18	2.5	4.2	4.2	32745000	569360	16646000	15530000	909600	15816	462400	431380
622	ENSMMUP00000003650	ENSMMUP00000003650	ENSMMUT00000003861	ENSMMUG00000002714	ENSMMUP00000003650|ENSMMUT00000003861|ENSMMUG00000002714|FAAH|fatty acid amide hydrolase [Source:HGNC Symbol;Acc:3553]	ENSP00000243167	ENSG00000117480	FAAH	fatty acid amide hydrolase [Source:HGNC Symbol;Acc:3553]	ortholog_one2one				3	3	3	2	2	YES	YES	3	2	2	6.2	6.2	62.423	578	6	6	6	1.4641e-15	6.2	4	4	39165000	14809000	12745000	11611000	1566600	592350	509800	464440
623	ENSMMUP00000003668	ENSMMUP00000003668	ENSMMUT00000003881	ENSMMUG00000002726	ENSMMUP00000003668|ENSMMUT00000003881|ENSMMUG00000002726|MOGS|mannosyl-oligosaccharide glucosidase [Source:HGNC Symbol;Acc:24862]	ENSP00000233616	ENSG00000115275	MOGS	mannosyl-oligosaccharide glucosidase [Source:HGNC Symbol;Acc:24862]	ortholog_one2one				16	16	13	14	12	YES	YES	13	14	12	29	29	92.117	837	52	48	42	0	24.6	25.9	25.8	986970000	293520000	446160000	247290000	21933000	6522600	9914600	5495300
624	ENSMMUP00000003679	ENSMMUP00000003679	ENSMMUT00000003893	ENSMMUG00000002737	ENSMMUP00000003679|ENSMMUT00000003893|ENSMMUG00000002737|FGL2|fibrinogen-like 2 [Source:HGNC Symbol;Acc:3696]	ENSP00000248598	ENSG00000127951	FGL2	fibrinogen-like 2 [Source:HGNC Symbol;Acc:3696]	ortholog_one2one				3	3	3	1	2	YES	YES	3	1	2	11.8	11.8	50.34	439	5	4	4	1.0041e-40	11.8	3.6	8.2	28484000	12560000	7670500	8253900	890130	392490	239700	257930
627	ENSMMUP00000003702	ENSMMUP00000003702	ENSMMUT00000003918	ENSMMUG00000002758	ENSMMUP00000003702|ENSMMUT00000003918|ENSMMUG00000002758									4	4	4	2	3	YES	YES	4	2	3	14.1	14.1	49.535	460	8	3	3	7.0387e-56	14.1	7	10.4	31960000	19844000	4324200	7792000	1065300	661470	144140	259730
628	ENSMMUP00000003704;ENSMMUP00000003705;ENSMMUP00000003701	ENSMMUP00000003704	ENSMMUT00000003920	ENSMMUG00000002759	ENSMMUP00000003704|ENSMMUT00000003920|ENSMMUG00000002759|DPM1|dolichyl-phosphate mannosyltransferase polypeptide 1, catalytic subunit [Source:HGNC Symbol;Acc:3005];	ENSP00000360644	ENSG00000000419	DPM1	dolichyl-phosphate mannosyltransferase polypeptide 1, catalytic subunit [Source:HGNC Symbol;Acc:3005]	ortholog_one2one				7	7	6	7	5	YES	YES	6	7	5	27.5	27.5	33.357	295	14	18	12	4.8105e-119	25.1	27.5	22	208790000	85576000	58061000	65156000	9942500	4075000	2764800	3102700
630	ENSMMUP00000003708	ENSMMUP00000003708	ENSMMUT00000003924	ENSMMUG00000002761	ENSMMUP00000003708|ENSMMUT00000003924|ENSMMUG00000002761|ADNP|activity-dependent neuroprotector homeobox [Source:HGNC Symbol;Acc:15766]	ENSP00000379346	ENSG00000101126	ADNP	activity-dependent neuroprotector homeobox [Source:HGNC Symbol;Acc:15766]	ortholog_one2one				10	10	6	8	6	YES	YES	6	8	6	10.6	10.6	123.6	1103	13	14	11	8.7904e-71	6.8	8.1	6.8	71142000	24034000	28233000	18875000	961380	324790	381520	255060
631	ENSMMUP00000035193;ENSMMUP00000003711	ENSMMUP00000035193	ENSMMUT00000042194	ENSMMUG00000002764	ENSMMUP00000035193|ENSMMUT00000042194|ENSMMUG00000002764|XM_001116723.1;									8	8	7	8	8	YES	YES	7	8	8	38.1	38.1	37.987	352	80	71	65	4.5583e-219	31.5	38.1	38.1	11528000000	5091400000	4228200000	2208600000	720510000	318210000	264260000	138040000
632	ENSMMUP00000003713	ENSMMUP00000003713	ENSMMUT00000003930	ENSMMUG00000002765	ENSMMUP00000003713|ENSMMUT00000003930|ENSMMUG00000002765|SLC25A11|solute carrier family 25 (mitochondrial carrier; oxoglutarate carrier), member 11 [Source:HGNC Symbol;Acc:10981]	ENSP00000225665	ENSG00000108528	SLC25A11	solute carrier family 25 (mitochondrial carrier; oxoglutarate carrier), member 11 [Source:HGNC Symbol;Acc:10981]	ortholog_one2one				8	1	7	8	6	YES	YES	1	1	1	29.3	3.8	34.135	314	22	22	21	1.6268e-40	21.7	29.3	20.7	339690000	141450000	109860000	88386000	17879000	7444800	5782000	4651900
633	ENSMMUP00000003717	ENSMMUP00000003717	ENSMMUT00000003935	ENSMMUG00000002772	ENSMMUP00000003717|ENSMMUT00000003935|ENSMMUG00000002772|PFN1|profilin 1 [Source:HGNC Symbol;Acc:8881]	ENSP00000225655	ENSG00000108518	PFN1	profilin 1 [Source:HGNC Symbol;Acc:8881]	ortholog_one2one				10	10	9	8	6	YES	YES	9	8	6	77.1	77.1	15.054	140	39	49	38	0	77.1	69.3	67.9	3995000000	953050000	1752800000	1289100000	443880000	105890000	194760000	143230000
634	ENSMMUP00000003724;ENSMMUP00000003723	ENSMMUP00000003724	ENSMMUT00000003942	ENSMMUG00000002775	ENSMMUP00000003724|ENSMMUT00000003942|ENSMMUG00000002775|SR140|U2-associated protein SR140 (140 kDa Ser/Arg-rich domain protein) [Source:UniProtKB/Swiss-Prot;Acc:O15042];	ENSP00000418563	ENSG00000163714	U2SURP	U2 snRNP-associated SURP domain containing [Source:HGNC Symbol;Acc:30855]	ortholog_one2one				7	7	5	5	7	YES	YES	5	5	7	10.6	10.6	118.31	1029	14	10	13	2.5768e-198	7.4	7.4	10.6	158070000	46463000	52236000	59369000	3363100	988580	1111400	1263200
636	ENSMMUP00000003739;ENSMMUP00000003740	ENSMMUP00000003739	ENSMMUT00000003957	ENSMMUG00000002789	ENSMMUP00000003739|ENSMMUT00000003957|ENSMMUG00000002789|SLC25A24|solute carrier family 25 (mitochondrial carrier; phosphate carrier), member 24 [Source:HGNC Symbol;Acc:20662];	ENSP00000457733	ENSG00000085491	SLC25A24	solute carrier family 25 (mitochondrial carrier; phosphate carrier), member 24 [Source:HGNC Symbol;Acc:20662]	ortholog_one2one				9	9	9	8	9	YES	YES	9	8	9	24.9	24.9	53.251	477	43	43	43	2.646e-208	24.9	24.3	24.9	1187300000	389310000	397950000	400040000	42404000	13904000	14213000	14287000
637	ENSMMUP00000003743;ENSMMUP00000009150;ENSMMUP00000028220	ENSMMUP00000003743	ENSMMUT00000003961	ENSMMUG00000002792	ENSMMUP00000003743|ENSMMUT00000003961|ENSMMUG00000002792;									10	5	10	10	9	YES	YES	5	5	4	63.5	34.8	20.697	181	101	72	69	0	63.5	63.5	59.7	4051500000	1424100000	1636100000	991290000	368320000	129470000	148740000	90117000
638	ENSMMUP00000003744;ENSMMUP00000028027	ENSMMUP00000003744	ENSMMUT00000003963	ENSMMUG00000021285	ENSMMUP00000003744|ENSMMUT00000003963|ENSMMUG00000021285|ARMC8|armadillo repeat containing 8 [Source:HGNC Symbol;Acc:24999];	ENSP00000420333	ENSG00000114098	ARMC8	armadillo repeat containing 8 [Source:HGNC Symbol;Acc:24999]	ortholog_one2one				2	2	1	1	1	YES	YES	1	1	1	4.4	4.4	73.862	658	1	1	1	1.9846e-07	1.5	2.9	2.9	5468900	1923000	1429000	2116800	127180	44721	33233	49228
639	ENSMMUP00000003745;ENSMMUP00000039786	ENSMMUP00000003745	ENSMMUT00000003964	ENSMMUG00000002794	ENSMMUP00000003745|ENSMMUT00000003964|ENSMMUG00000002794|GTF2B|general transcription factor IIB [Source:HGNC Symbol;Acc:4648]	ENSP00000359531	ENSG00000137947	GTF2B	general transcription factor IIB [Source:HGNC Symbol;Acc:4648]	ortholog_one2one				6	6	4	3	2	YES	YES	4	3	2	24.7	24.7	34.833	316	7	4	4	9.481e-44	18	13	12.7	38715000	23173000	7665000	7877000	1613100	965550	319370	328210
640	ENSMMUP00000003748	ENSMMUP00000003748	ENSMMUT00000003968	ENSMMUG00000002799	ENSMMUP00000003748|ENSMMUT00000003968|ENSMMUG00000002799|IWS1|IWS1 homolog (S. cerevisiae) [Source:HGNC Symbol;Acc:25467]	ENSP00000295321	ENSG00000163166	IWS1	IWS1 homolog (S. cerevisiae) [Source:HGNC Symbol;Acc:25467]	ortholog_one2one				3	3	1	2	2	YES	YES	1	2	2	5.6	5.6	91.832	819	5	7	6	2.5473e-58	2.3	3.9	4	30530000	6191900	14048000	10291000	610600	123840	280950	205810
642	ENSMMUP00000039194;ENSMMUP00000003763;ENSMMUP00000029046;ENSMMUP00000031280;ENSMMUP00000033818;ENSMMUP00000001936;ENSMMUP00000012594;ENSMMUP00000038491;ENSMMUP00000003469;ENSMMUP00000002611	ENSMMUP00000039194	ENSMMUT00000046150	ENSMMUG00000031747	ENSMMUP00000039194|ENSMMUT00000046150|ENSMMUG00000031747|HIST2H2BF|histone cluster 2, H2bf [Source:HGNC Symbol;Acc:24700];	ENSP00000445831	ENSG00000203814	HIST2H2BF	histone cluster 2, H2bf [Source:HGNC Symbol;Acc:24700]	ortholog_one2one				3	2	3	2	3	YES	YES	2	1	2	25.8	18.8	14.166	128	320	305	322	0	25.8	18.8	25.8	27079000000	16915000000	7311800000	2852400000	2256600000	1409600000	609310000	237700000
643	ENSMMUP00000003770;ENSMMUP00000003769	ENSMMUP00000003770	ENSMMUT00000003994	ENSMMUG00000002820	ENSMMUP00000003770|ENSMMUT00000003994|ENSMMUG00000002820|C3orf63|Uncharacterized protein C3orf63 (Retinoblastoma-associated protein RAP140)(CTCL tumor antigen se89-1) [Source:UniProtKB/Swiss-Prot;Acc:Q9UK61];	ENSP00000417509	ENSG00000163946	FAM208A	family with sequence similarity 208, member A [Source:HGNC Symbol;Acc:30314]	ortholog_one2one				5	5	2	3	4	YES	YES	2	3	4	5.9	5.9	179.94	1586	2	3	6	2.2999e-134	2.5	3.7	4.7	41595000	9121800	17575000	14899000	452120	99150	191030	161940
644	ENSMMUP00000003772	ENSMMUP00000003772	ENSMMUT00000003996	ENSMMUG00000002821	ENSMMUP00000003772|ENSMMUT00000003996|ENSMMUG00000002821|ORC3L|origin recognition complex, subunit 3-like (yeast) [Source:HGNC Symbol;Acc:8489]	ENSP00000257789	ENSG00000135336	ORC3	origin recognition complex, subunit 3 [Source:HGNC Symbol;Acc:8489]	ortholog_one2one				2	2	2	2	2	YES	YES	2	2	2	4.7	4.7	75.278	653	3	4	5	1.0547e-165	4.7	4.7	4.7	40926000	10770000	14392000	15764000	1023200	269250	359800	394110
645	ENSMMUP00000003776	ENSMMUP00000003776	ENSMMUT00000004001	ENSMMUG00000002822	ENSMMUP00000003776|ENSMMUT00000004001|ENSMMUG00000002822|UNC13D|unc-13 homolog D (C. elegans) [Source:HGNC Symbol;Acc:23147]	ENSP00000207549	ENSG00000092929	UNC13D	unc-13 homolog D (C. elegans) [Source:HGNC Symbol;Acc:23147]	ortholog_one2one				2	2	2	1	2	YES	YES	2	1	2	2.2	2.2	123.13	1090	3	2	6	1.0283e-06	2.2	1.3	2.2	36498000	9266000	5221500	22010000	701880	178190	100410	423270
647	ENSMMUP00000003781;ENSMMUP00000003782;ENSMMUP00000003785;ENSMMUP00000003788	ENSMMUP00000003781	ENSMMUT00000004006	ENSMMUG00000002808	ENSMMUP00000003781|ENSMMUT00000004006|ENSMMUG00000002808|TSC2|tuberous sclerosis 2 [Source:HGNC Symbol;Acc:12363];	ENSP00000219476	ENSG00000103197	TSC2	tuberous sclerosis 2 [Source:HGNC Symbol;Acc:12363]	ortholog_one2one				2	2	2	1	1	YES	YES	2	1	1	1.4	1.4	200.62	1807	3	1	1	1.777e-45	1.4	0.7	0.7	6015400	5592200	200740	222430	59558	55368	1987.5	2202.3
648	ENSMMUP00000003787	ENSMMUP00000003787	ENSMMUT00000004012	ENSMMUG00000002833	ENSMMUP00000003787|ENSMMUT00000004012|ENSMMUG00000002833|KLHDC8B|kelch domain containing 8B [Source:HGNC Symbol;Acc:28557]	ENSP00000327468	ENSG00000185909	KLHDC8B	kelch domain containing 8B [Source:HGNC Symbol;Acc:28557]	ortholog_one2one				3	3	2	1	2	YES	YES	2	1	2	17.2	17.2	37.623	354	2	1	3	7.4863e-12	13.3	5.4	9.3	8156500	3935300	629630	3591500	479790	231490	37037	211260
650	ENSMMUP00000033854;ENSMMUP00000003808;ENSMMUP00000033852	ENSMMUP00000033854	ENSMMUT00000040828	ENSMMUG00000002848	ENSMMUP00000033854|ENSMMUT00000040828|ENSMMUG00000002848|LOC710901;						ENSMUSP00000088663	ENSMUSG00000079484	ortholog_one2one	4	4	4	3	4	YES	YES	4	3	4	19.5	19.5	18.175	169	17	15	17	1.8975e-54	19.5	19.5	19.5	715690000	352830000	196600000	166250000	89461000	44104000	24575000	20782000
651	ENSMMUP00000003811	ENSMMUP00000003811	ENSMMUT00000004037	ENSMMUG00000002849	ENSMMUP00000003811|ENSMMUT00000004037|ENSMMUG00000002849|SGSH|N-sulfoglucosamine sulfohydrolase [Source:HGNC Symbol;Acc:10818]	ENSP00000314606	ENSG00000181523	SGSH	N-sulfoglucosamine sulfohydrolase [Source:HGNC Symbol;Acc:10818]	ortholog_one2one				9	9	6	6	6	YES	YES	6	6	6	28.3	28.3	56.627	502	9	11	11	1.2634e-95	24.1	17.5	20.3	190190000	47618000	63710000	78860000	7314900	1831400	2450400	3033100
653	ENSMMUP00000003828	ENSMMUP00000003828	ENSMMUT00000004055	ENSMMUG00000002863	ENSMMUP00000003828|ENSMMUT00000004055|ENSMMUG00000002863|TFG|TRK-fused gene [Source:HGNC Symbol;Acc:11758]	ENSP00000240851	ENSG00000114354	TFG	TRK-fused gene [Source:HGNC Symbol;Acc:11758]	ortholog_one2one				6	6	4	5	6	YES	YES	4	5	6	23.5	23.5	43.457	400	17	22	13	2.9089e-158	17	17	23.5	552640000	180520000	218130000	153990000	36843000	12035000	14542000	10266000
656	ENSMMUP00000003849	ENSMMUP00000003849	ENSMMUT00000004077	ENSMMUG00000002879	ENSMMUP00000003849|ENSMMUT00000004077|ENSMMUG00000002879|GABPB1|GA binding protein transcription factor, beta subunit 1 [Source:HGNC Symbol;Acc:4074]	ENSP00000220429	ENSG00000104064	GABPB1	GA binding protein transcription factor, beta subunit 1 [Source:HGNC Symbol;Acc:4074]	ortholog_one2one				2	2	2	2	1	YES	YES	2	2	1	10.4	10.4	42.482	395	4	4	2	9.3431e-07	10.4	10.4	5.3	41136000	17450000	12560000	11126000	3428000	1454200	1046700	927140
657	ENSMMUP00000003877;ENSMMUP00000003872;ENSMMUP00000003876;ENSMMUP00000005723	ENSMMUP00000003877	ENSMMUT00000004109	ENSMMUG00000002894	ENSMMUP00000003877|ENSMMUT00000004109|ENSMMUG00000002894|DOCK4|dedicator of cytokinesis 4 [Source:HGNC Symbol;Acc:19192];	ENSP00000404179	ENSG00000128512	DOCK4	dedicator of cytokinesis 4 [Source:HGNC Symbol;Acc:19192]	ortholog_one2one				8	8	6	6	7	YES	YES	6	6	7	5.2	5.2	223.8	1958	10	9	11	5.0933e-39	3.6	4.2	4.7	34776000	8227400	13516000	13032000	310500	73459	120680	116360
658	ENSMMUP00000003882;ENSMMUP00000003884	ENSMMUP00000003882	ENSMMUT00000004114	ENSMMUG00000002899	ENSMMUP00000003882|ENSMMUT00000004114|ENSMMUG00000002899|FUBP1|far upstream element (FUSE) binding protein 1 [Source:HGNC Symbol;Acc:4004];	ENSP00000359804	ENSG00000162613	FUBP1	far upstream element (FUSE) binding protein 1 [Source:HGNC Symbol;Acc:4004]	ortholog_one2one				10	9	10	8	8	YES	YES	9	7	8	22	20.6	68.691	654	36	32	34	1.0105e-78	22	18.7	20.5	862410000	346610000	243480000	272320000	23308000	9367800	6580600	7360000
659	ENSMMUP00000003895	ENSMMUP00000003895	ENSMMUT00000004128	ENSMMUG00000002910	ENSMMUP00000003895|ENSMMUT00000004128|ENSMMUG00000002910|EIF2B2|eukaryotic translation initiation factor 2B, subunit 2 beta, 39kDa [Source:HGNC Symbol;Acc:3258]	ENSP00000266126	ENSG00000119718	EIF2B2	eukaryotic translation initiation factor 2B, subunit 2 beta, 39kDa [Source:HGNC Symbol;Acc:3258]	ortholog_one2one				3	3	2	2	3	YES	YES	2	2	3	12.8	12.8	38.968	351	3	2	4	3.3505e-10	8.5	8.5	12.8	70812000	22994000	17399000	30419000	3727000	1210200	915750	1601000
660	ENSMMUP00000003898;ENSMMUP00000003896	ENSMMUP00000003898	ENSMMUT00000004131	ENSMMUG00000002912	ENSMMUP00000003898|ENSMMUT00000004131|ENSMMUG00000002912|TLE6|transducin-like enhancer of split 6 (E(sp1) homolog, Drosophila) [Source:HGNC Symbol;Acc:30788];	ENSP00000246112	ENSG00000104953	TLE6	transducin-like enhancer of split 6 (E(sp1) homolog, Drosophila) [Source:HGNC Symbol;Acc:30788]	ortholog_one2one				2	2	2	2	2	YES	YES	2	2	2	11.1	11.1	48.139	433	4	5	4	6.5622e-36	11.1	11.1	11.1	145400000	45195000	54578000	45623000	5815800	1807800	2183100	1824900
661	ENSMMUP00000003908	ENSMMUP00000003908	ENSMMUT00000004142	ENSMMUG00000002919	ENSMMUP00000003908|ENSMMUT00000004142|ENSMMUG00000002919|UBASH3B|ubiquitin associated and SH3 domain containing B [Source:HGNC Symbol;Acc:29884]	ENSP00000284273	ENSG00000154127	UBASH3B	ubiquitin associated and SH3 domain containing B [Source:HGNC Symbol;Acc:29884]	ortholog_one2one				2	2	2	1	1	YES	YES	2	1	1	4.2	4.2	72.658	649	2	1	1	2.2721e-25	4.2	2.3	2.3	2220700	1631500	447260	141910	61686	45321	12424	3941.8
662	ENSMMUP00000003910;ENSMMUP00000003911	ENSMMUP00000003910	ENSMMUT00000004145	ENSMMUG00000002921	ENSMMUP00000003910|ENSMMUT00000004145|ENSMMUG00000002921|CPSF6|microRNA 1279 [Source:HGNC Symbol;Acc:35357];	ENSP00000391774	ENSG00000111605	CPSF6	cleavage and polyadenylation specific factor 6, 68kDa [Source:HGNC Symbol;Acc:13871]	ortholog_one2one				5	5	4	4	5	YES	YES	4	4	5	14.3	14.3	63.47	588	21	18	20	1.1391e-218	11.6	11.6	14.3	588100000	139040000	273780000	175280000	22619000	5347600	10530000	6741700
664	ENSMMUP00000003919;ENSMMUP00000034586;ENSMMUP00000009877	ENSMMUP00000003919	ENSMMUT00000004154	ENSMMUG00000002926	ENSMMUP00000003919|ENSMMUT00000004154|ENSMMUG00000002926|THRAP4;									5	5	5	3	3	YES	YES	5	3	3	8.8	8.8	110.33	990	9	8	6	8.2939e-19	8.8	4.9	5.4	32027000	15250000	8830500	7946600	542830	258470	149670	134690
666	ENSMMUP00000003922	ENSMMUP00000003922	ENSMMUT00000004157	ENSMMUG00000002932	ENSMMUP00000003922|ENSMMUT00000004157|ENSMMUG00000002932|DPT|dermatopontin [Source:HGNC Symbol;Acc:3011]	ENSP00000356791	ENSG00000143196	DPT	dermatopontin [Source:HGNC Symbol;Acc:3011]	ortholog_one2one				5	5	5	5	5	YES	YES	5	5	5	39.2	39.2	24.399	204	19	17	20	1.46e-282	39.2	39.2	39.2	636150000	204870000	209770000	221510000	70683000	22763000	23308000	24612000
668	ENSMMUP00000003928	ENSMMUP00000003928	ENSMMUT00000004164	ENSMMUG00000002936	ENSMMUP00000003928|ENSMMUT00000004164|ENSMMUG00000002936|GMPR|guanosine monophosphate reductase [Source:HGNC Symbol;Acc:4376]	ENSP00000259727	ENSG00000137198	GMPR	guanosine monophosphate reductase [Source:HGNC Symbol;Acc:4376]	ortholog_one2one				2	2	2	2	2	YES	YES	2	2	2	6.9	6.9	33.885	317	10	13	10	5.3609e-78	6.9	6.9	6.9	119970000	30026000	55116000	34830000	7998100	2001700	3674400	2322000
670	ENSMMUP00000003936	ENSMMUP00000003936	ENSMMUT00000004172	ENSMMUG00000002943	ENSMMUP00000003936|ENSMMUT00000004172|ENSMMUG00000002943|QARS|glutaminyl-tRNA synthetase [Source:HGNC Symbol;Acc:9751]	ENSP00000307567	ENSG00000172053	QARS	glutaminyl-tRNA synthetase [Source:HGNC Symbol;Acc:9751]	ortholog_one2one				13	13	13	12	11	YES	YES	13	12	11	19.6	19.6	87.738	775	31	29	32	2.0705e-98	19.6	19.2	17.3	463320000	153600000	160830000	148890000	9652600	3200100	3350600	3101900
671	ENSMMUP00000003938	ENSMMUP00000003938	ENSMMUT00000004174	ENSMMUG00000002947	ENSMMUP00000003938|ENSMMUT00000004174|ENSMMUG00000002947|PCOLCE|procollagen C-endopeptidase enhancer [Source:HGNC Symbol;Acc:8738]	ENSP00000223061	ENSG00000106333	PCOLCE	procollagen C-endopeptidase enhancer [Source:HGNC Symbol;Acc:8738]	ortholog_one2one				6	6	4	4	4	YES	YES	4	4	4	21.7	21.7	48.368	451	6	4	6	1.1196e-46	16.2	14.4	15.1	104820000	32963000	37525000	34327000	3743400	1177300	1340200	1226000
672	ENSMMUP00000003955	ENSMMUP00000003955	ENSMMUT00000004192	ENSMMUG00000002952	ENSMMUP00000003955|ENSMMUT00000004192|ENSMMUG00000002952|LAMB2|laminin, beta 2 (laminin S) [Source:HGNC Symbol;Acc:6487]	ENSP00000388325	ENSG00000172037	LAMB2	laminin, beta 2 (laminin S) [Source:HGNC Symbol;Acc:6487]	ortholog_one2one				32	32	30	30	28	YES	YES	30	30	28	27.4	27.4	196.01	1798	125	132	124	0	26	25.2	24.9	8206500000	2908500000	3165000000	2133000000	75289000	26683000	29037000	19569000
673	ENSMMUP00000003956;ENSMMUP00000034171;ENSMMUP00000034170	ENSMMUP00000003956	ENSMMUT00000004193	ENSMMUG00000002959	ENSMMUP00000003956|ENSMMUT00000004193|ENSMMUG00000002959|HELZ|helicase with zinc finger [Source:HGNC Symbol;Acc:16878];	ENSP00000351524	ENSG00000198265	HELZ	helicase with zinc finger [Source:HGNC Symbol;Acc:16878]	ortholog_one2one				3	3	2	1	2	YES	YES	2	1	2	2.8	2.8	218.69	1941	3	2	3	2.7603e-20	1.4	0.6	2	14151000	2958100	4438500	6754700	140110	29289	43945	66879
674	ENSMMUP00000003957;ENSMMUP00000025987	ENSMMUP00000003957	ENSMMUT00000004194	ENSMMUG00000002961	ENSMMUP00000003957|ENSMMUT00000004194|ENSMMUG00000002961|GNA11|guanine nucleotide binding protein (G protein), alpha 11 (Gq class) [Source:HGNC Symbol;Acc:4379]	ENSP00000078429	ENSG00000088256	GNA11	guanine nucleotide binding protein (G protein), alpha 11 (Gq class) [Source:HGNC Symbol;Acc:4379]	ortholog_one2one				6	4	6	5	4	YES	YES	4	4	4	27	18.4	42.113	359	16	13	12	1.5041e-101	27	22.6	18.4	540830000	254480000	179490000	106860000	23514000	11064000	7803700	4646100
676	ENSMMUP00000003974	ENSMMUP00000003974	ENSMMUT00000004212	ENSMMUG00000002974	ENSMMUP00000003974|ENSMMUT00000004212|ENSMMUG00000002974|ACP5|acid phosphatase 5, tartrate resistant [Source:HGNC Symbol;Acc:124]	ENSP00000468767	ENSG00000102575	ACP5	acid phosphatase 5, tartrate resistant [Source:HGNC Symbol;Acc:124]	ortholog_one2one				7	7	5	4	7	YES	YES	5	4	7	37.8	37.8	36.681	325	20	17	17	1.8666e-74	31.7	20.3	37.8	919420000	378370000	279300000	261750000	61294000	25225000	18620000	17450000
677	ENSMMUP00000003989;ENSMMUP00000003987;ENSMMUP00000003991	ENSMMUP00000003989	ENSMMUT00000004228	ENSMMUG00000002984	ENSMMUP00000003989|ENSMMUT00000004228|ENSMMUG00000002984|XM_001109439.1	ENSP00000379691	ENSG00000179889	PDXDC1	pyridoxal-dependent decarboxylase domain containing 1 [Source:HGNC Symbol;Acc:28995]	ortholog_one2one				11	11	8	7	7	YES	YES	8	7	7	24.4	24.4	86.705	788	15	10	10	2.4694e-70	18.4	15.7	16.2	397930000	256190000	69199000	72541000	8842800	5693000	1537800	1612000
678	ENSMMUP00000003992	ENSMMUP00000003992	ENSMMUT00000004232	ENSMMUG00000002985	ENSMMUP00000003992|ENSMMUT00000004232|ENSMMUG00000002985|GBF1|golgi brefeldin A resistant guanine nucleotide exchange factor 1 [Source:HGNC Symbol;Acc:4181]	ENSP00000359000	ENSG00000107862	GBF1	golgi brefeldin A resistant guanine nucleotide exchange factor 1 [Source:HGNC Symbol;Acc:4181]	ortholog_one2one				10	10	10	8	7	YES	YES	10	8	7	7.5	7.5	206.41	1859	14	17	18	1.3487e-91	7.5	5.6	5.5	116180000	27986000	53059000	35138000	1065900	256750	486780	322370
679	ENSMMUP00000003997;ENSMMUP00000003998;ENSMMUP00000035698	ENSMMUP00000003997	ENSMMUT00000004237	ENSMMUG00000002990	ENSMMUP00000003997|ENSMMUT00000004237|ENSMMUG00000002990|NFKB2|nuclear factor of kappa light polypeptide gene enhancer in B-cells 2 (p49/p100) [Source:HGNC Symbol;Acc:7795];	ENSP00000358983	ENSG00000077150	NFKB2	nuclear factor of kappa light polypeptide gene enhancer in B-cells 2 (p49/p100) [Source:HGNC Symbol;Acc:7795]	ortholog_one2one				2	2	1	1	2	YES	YES	1	1	2	5	5	92.526	859	1	2	2	5.4405e-17	2.6	2.4	5	26701000	7558300	5006600	14136000	593360	167960	111260	314140
681	ENSMMUP00000034942;ENSMMUP00000004023	ENSMMUP00000034942	ENSMMUT00000041932	ENSMMUG00000003012	ENSMMUP00000034942|ENSMMUT00000041932|ENSMMUG00000003012|SCRN2|secernin 2 [Source:HGNC Symbol;Acc:30381];	ENSP00000290216	ENSG00000141295	SCRN2	secernin 2 [Source:HGNC Symbol;Acc:30381]	ortholog_one2one				4	4	4	3	3	YES	YES	4	3	3	19	19	47.732	436	13	15	13	6.817e-47	19	15.4	15.4	270930000	103010000	85977000	81940000	12315000	4682400	3908000	3724500
683	ENSMMUP00000004029	ENSMMUP00000004029	ENSMMUT00000004273	ENSMMUG00000003017	ENSMMUP00000004029|ENSMMUT00000004273|ENSMMUG00000003017|TMEM70|transmembrane protein 70 [Source:HGNC Symbol;Acc:26050]	ENSP00000312599	ENSG00000175606	TMEM70	transmembrane protein 70 [Source:HGNC Symbol;Acc:26050]	ortholog_one2one				2	2	2	2	2	YES	YES	2	2	2	13.5	13.5	28.996	260	3	2	4	2.3982e-13	13.5	13.5	13.5	99428000	25675000	31384000	42370000	6628500	1711700	2092200	2824700
686	ENSMMUP00000004035;ENSMMUP00000035585	ENSMMUP00000004035	ENSMMUT00000004280	ENSMMUG00000003023	ENSMMUP00000004035|ENSMMUT00000004280|ENSMMUG00000003023|CCT8|chaperonin containing TCP1, subunit 8 (theta) [Source:HGNC Symbol;Acc:1623];	ENSP00000286788	ENSG00000156261	CCT8	chaperonin containing TCP1, subunit 8 (theta) [Source:HGNC Symbol;Acc:1623]	ortholog_one2one				10	10	8	8	7	YES	YES	8	8	7	27.2	27.2	59.374	547	33	33	27	2.4704e-183	21.4	21.2	17.4	1175700000	429180000	433820000	312650000	27992000	10219000	10329000	7444100
687	ENSMMUP00000031774;ENSMMUP00000004044;ENSMMUP00000031773	ENSMMUP00000031774	ENSMMUT00000038693	ENSMMUG00000003031	ENSMMUP00000031774|ENSMMUT00000038693|ENSMMUG00000003031|PGLYRP2|peptidoglycan recognition protein 2 [Source:HGNC Symbol;Acc:30013];	ENSP00000345968	ENSG00000161031	PGLYRP2	peptidoglycan recognition protein 2 [Source:HGNC Symbol;Acc:30013]	ortholog_one2one	ENSMUSP00000018653	ENSMUSG00000018509	ortholog_one2one	8	8	6	6	6	YES	YES	6	6	6	28.3	28.3	61.836	576	19	15	16	1.2947e-106	20.5	18.1	20.5	520020000	201230000	166950000	151840000	21668000	8384500	6956200	6326800
688	ENSMMUP00000004045;ENSMMUP00000018613;ENSMMUP00000018611	ENSMMUP00000004045	ENSMMUT00000004290	ENSMMUG00000003029	ENSMMUP00000004045|ENSMMUT00000004290|ENSMMUG00000003029|PRMT1|protein arginine methyltransferase 1 [Source:HGNC Symbol;Acc:5187]	ENSP00000406162	ENSG00000126457	PRMT1	protein arginine methyltransferase 1 [Source:HGNC Symbol;Acc:5187]	ortholog_one2one				12	12	11	12	11	YES	YES	11	12	11	49.4	49.4	36.737	320	35	35	35	1.7034e-93	49.4	49.4	44.4	1212600000	470900000	376700000	364950000	60628000	23545000	18835000	18247000
690	ENSMMUP00000004053;ENSMMUP00000041222	ENSMMUP00000004053	ENSMMUT00000004299	ENSMMUG00000003040	ENSMMUP00000004053|ENSMMUT00000004299|ENSMMUG00000003040|ACAA2|acetyl-CoA acyltransferase 2 [Source:HGNC Symbol;Acc:83];	ENSP00000285093	ENSG00000167315	ACAA2	acetyl-CoA acyltransferase 2 [Source:HGNC Symbol;Acc:83]	ortholog_one2one				11	11	9	10	10	YES	YES	9	10	10	48.4	48.4	41.805	397	42	44	43	0	41.6	41.6	48.4	2273200000	655780000	961060000	656350000	94716000	27324000	40044000	27348000
692	ENSMMUP00000004055	ENSMMUP00000004055	ENSMMUT00000004301	ENSMMUG00000030403	ENSMMUP00000004055|ENSMMUT00000004301|ENSMMUG00000030403									3	3	2	3	3	YES	YES	2	3	3	34.4	34.4	14.28	128	3	5	4	2.6229e-16	25.8	34.4	34.4	25701000	6946300	11296000	7458600	3671600	992330	1613800	1065500
693	ENSMMUP00000004064;ENSMMUP00000004062	ENSMMUP00000004064	ENSMMUT00000004311	ENSMMUG00000003042	ENSMMUP00000004064|ENSMMUT00000004311|ENSMMUG00000003042;									4	4	4	2	3	YES	YES	4	2	3	12.4	12.4	79.25	696	8	6	8	1.8827e-89	12.4	7.5	11.4	120660000	27636000	56575000	36446000	3093800	708630	1450600	934520
694	ENSMMUP00000004065;ENSMMUP00000004066	ENSMMUP00000004065	ENSMMUT00000004312	ENSMMUG00000003046	ENSMMUP00000004065|ENSMMUT00000004312|ENSMMUG00000003046|GAMT|guanidinoacetate N-methyltransferase [Source:HGNC Symbol;Acc:4136];	ENSP00000403536	ENSG00000130005	GAMT	guanidinoacetate N-methyltransferase [Source:HGNC Symbol;Acc:4136]	ortholog_one2one				4	4	4	4	4	YES	YES	4	4	4	31.2	31.2	26.145	234	24	27	19	1.1803e-85	31.2	31.2	31.2	526860000	163410000	241770000	121680000	58540000	18157000	26863000	13520000
695	ENSMMUP00000004067;ENSMMUP00000004068	ENSMMUP00000004067	ENSMMUT00000004314	ENSMMUG00000003047	ENSMMUP00000004067|ENSMMUT00000004314|ENSMMUG00000003047|DAZAP1|DAZ associated protein 1 [Source:HGNC Symbol;Acc:2683];	ENSP00000233078	ENSG00000071626	DAZAP1	DAZ associated protein 1 [Source:HGNC Symbol;Acc:2683]	ortholog_one2one				4	4	4	3	4	YES	YES	4	3	4	19.7	19.7	43.324	407	23	31	25	1.0086e-127	19.7	14.5	19.7	679060000	182800000	326090000	170160000	52235000	14062000	25084000	13089000
696	ENSMMUP00000032005;ENSMMUP00000004069	ENSMMUP00000032005	ENSMMUT00000038921	ENSMMUG00000003050	ENSMMUP00000032005|ENSMMUT00000038921|ENSMMUG00000003050|RPS15|ribosomal protein S15 [Source:HGNC Symbol;Acc:10388];	ENSP00000467676	ENSG00000115268	RPS15	ribosomal protein S15 [Source:HGNC Symbol;Acc:10388]	apparent_ortholog_one2one	ENSMUSP00000001242	ENSMUSG00000053329	ortholog_one2one	2	2	1	1	2	YES	YES	1	1	2	30.3	30.3	17.707	152	12	11	14	1.0681e-125	12.5	12.5	30.3	604100000	147470000	246280000	210350000	75513000	18434000	30785000	26294000
697	ENSMMUP00000004070;ENSMMUP00000032774	ENSMMUP00000004070	ENSMMUT00000004317	ENSMMUG00000003048	ENSMMUP00000004070|ENSMMUT00000004317|ENSMMUG00000003048|MRPS22|mitochondrial ribosomal protein S22 [Source:HGNC Symbol;Acc:14508]	ENSP00000418008	ENSG00000175110	MRPS22	mitochondrial ribosomal protein S22 [Source:HGNC Symbol;Acc:14508]	ortholog_one2one				7	7	7	2	2	YES	YES	7	2	2	30.3	30.3	41.323	360	11	3	4	8.4462e-41	30.3	11.1	11.1	154200000	58841000	45559000	49800000	6704400	2558300	1980800	2165200
698	ENSMMUP00000004072	ENSMMUP00000004072	ENSMMUT00000004320	ENSMMUG00000003051	ENSMMUP00000004072|ENSMMUT00000004320|ENSMMUG00000003051|COPB2|coatomer protein complex, subunit beta 2 (beta prime) [Source:HGNC Symbol;Acc:2232]	ENSP00000329419	ENSG00000184432	COPB2	coatomer protein complex, subunit beta 2 (beta prime) [Source:HGNC Symbol;Acc:2232]	ortholog_one2one				16	16	13	13	12	YES	YES	13	13	12	28.3	28.3	102.22	906	42	45	43	3.4202e-162	22.6	22.4	22.5	1236900000	488170000	442520000	306240000	23787000	9387900	8510100	5889200
699	ENSMMUP00000004091;ENSMMUP00000004093	ENSMMUP00000004091	ENSMMUT00000004339	ENSMMUG00000003067	ENSMMUP00000004091|ENSMMUT00000004339|ENSMMUG00000003067|ERGIC1;	ENSP00000377374	ENSG00000113719	ERGIC1	endoplasmic reticulum-golgi intermediate compartment (ERGIC) 1 [Source:HGNC Symbol;Acc:29205]	ortholog_one2one				5	5	4	4	4	YES	YES	4	4	4	28.3	28.3	32.468	290	10	10	13	7.3275e-32	20	25.2	25.2	295010000	113100000	75212000	106700000	22693000	8699600	5785500	8207600
700	ENSMMUP00000004102;ENSMMUP00000011436	ENSMMUP00000004102	ENSMMUT00000004350	ENSMMUG00000003073	ENSMMUP00000004102|ENSMMUT00000004350|ENSMMUG00000003073	ENSP00000448035	ENSG00000196531	NACA	nascent polypeptide-associated complex alpha subunit [Source:HGNC Symbol;Acc:7629]	apparent_ortholog_one2one				6	6	6	6	5	YES	YES	6	6	5	37.5	37.5	20.947	192	25	23	24	0	37.5	37.5	36.5	740030000	217620000	281100000	241300000	123340000	36270000	46850000	40217000
701	ENSMMUP00000004103	ENSMMUP00000004103	ENSMMUT00000004351	ENSMMUG00000003075	ENSMMUP00000004103|ENSMMUT00000004351|ENSMMUG00000003075|CCDC9|coiled-coil domain containing 9 [Source:HGNC Symbol;Acc:24560]	ENSP00000221922	ENSG00000105321	CCDC9	coiled-coil domain containing 9 [Source:HGNC Symbol;Acc:24560]	ortholog_one2one				2	2	1	1	2	YES	YES	1	1	2	8.9	8.9	59.162	528	1	2	2	4.9861e-21	4.2	4.2	8.9	34736000	7743700	11516000	15477000	1085500	241990	359860	483660
703	ENSMMUP00000004124	ENSMMUP00000004124	ENSMMUT00000004373	ENSMMUG00000003092	ENSMMUP00000004124|ENSMMUT00000004373|ENSMMUG00000003092|BUB3|budding uninhibited by benzimidazoles 3 homolog (yeast) [Source:HGNC Symbol;Acc:1151]	ENSP00000357858	ENSG00000154473	BUB3	BUB3 mitotic checkpoint protein [Source:HGNC Symbol;Acc:1151]	ortholog_one2one				6	6	6	6	5	YES	YES	6	6	5	27.1	27.1	37.154	328	25	18	25	3.4976e-74	27.1	27.1	26.8	1108700000	733750000	175790000	199170000	69294000	45859000	10987000	12448000
704	ENSMMUP00000004138	ENSMMUP00000004138	ENSMMUT00000004388	ENSMMUG00000003098	ENSMMUP00000004138|ENSMMUT00000004388|ENSMMUG00000003098|PMPCA|peptidase (mitochondrial processing) alpha [Source:HGNC Symbol;Acc:18667]	ENSP00000360782	ENSG00000165688	PMPCA	peptidase (mitochondrial processing) alpha [Source:HGNC Symbol;Acc:18667]	ortholog_one2one				5	5	5	2	3	YES	YES	5	2	3	17	17	58.195	525	7	4	5	2.5445e-28	17	5.7	9.7	100960000	46393000	18884000	35683000	3155000	1449800	590130	1115100
705	ENSMMUP00000004139	ENSMMUP00000004139	ENSMMUT00000004389	ENSMMUG00000003102	ENSMMUP00000004139|ENSMMUT00000004389|ENSMMUG00000003102|ALDH18A1|aldehyde dehydrogenase 18 family, member A1 [Source:HGNC Symbol;Acc:9722]	ENSP00000360268	ENSG00000059573	ALDH18A1	aldehyde dehydrogenase 18 family, member A1 [Source:HGNC Symbol;Acc:9722]	ortholog_one2one				6	6	6	6	5	YES	YES	6	6	5	9.2	9.2	86.548	795	17	15	10	4.5676e-83	9.2	9.2	9.2	219550000	61851000	125910000	31792000	4574000	1288600	2623100	662330
706	ENSMMUP00000004141;ENSMMUP00000004142	ENSMMUP00000004141	ENSMMUT00000004391	ENSMMUG00000003104	ENSMMUP00000004141|ENSMMUT00000004391|ENSMMUG00000003104|TOLLIP|toll interacting protein [Source:HGNC Symbol;Acc:16476];	ENSP00000314733	ENSG00000078902	TOLLIP	toll interacting protein [Source:HGNC Symbol;Acc:16476]	ortholog_one2one				3	3	3	3	3	YES	YES	3	3	3	15.3	15.3	30.312	274	12	10	8	6.6062e-21	15.3	15.3	15.3	387870000	134690000	167560000	85616000	24242000	8418100	10473000	5351000
707	ENSMMUP00000004144;ENSMMUP00000004145	ENSMMUP00000004144	ENSMMUT00000004394	ENSMMUG00000003103	ENSMMUP00000004144|ENSMMUT00000004394|ENSMMUG00000003103|TCTN3|tectonic family member 3 [Source:HGNC Symbol;Acc:24519];	ENSP00000265993	ENSG00000119977	TCTN3	tectonic family member 3 [Source:HGNC Symbol;Acc:24519]	ortholog_one2one				2	2	1	1	2	YES	YES	1	1	2	3	3	67.78	625	2	2	2	8.186e-05	1.3	1.3	3	3375900	1573800	1103500	698610	120570	56207	39410	24950
708	ENSMMUP00000004150	ENSMMUP00000004150	ENSMMUT00000004400	ENSMMUG00000003110	ENSMMUP00000004150|ENSMMUT00000004400|ENSMMUG00000003110|Q9N143_MACMU|Tyrosine kinase-2 Fragment [Source:UniProtKB/TrEMBL;Acc:Q9N143]	ENSP00000431885	ENSG00000105397	TYK2	tyrosine kinase 2 [Source:HGNC Symbol;Acc:12440]	ortholog_one2one				7	7	5	3	2	YES	YES	5	3	2	10.3	10.3	131.38	1175	6	5	4	2.4348e-19	7.4	4.8	3.6	24921000	11477000	10472000	2971900	383400	176570	161110	45722
709	ENSMMUP00000004151	ENSMMUP00000004151	ENSMMUT00000004401	ENSMMUG00000003111	ENSMMUP00000004151|ENSMMUT00000004401|ENSMMUG00000003111|CDC37|cell division cycle 37 homolog (S. cerevisiae) [Source:HGNC Symbol;Acc:1735]	ENSP00000222005	ENSG00000105401	CDC37	cell division cycle 37 [Source:HGNC Symbol;Acc:1735]	ortholog_one2one				8	8	7	5	7	YES	YES	7	5	7	26.5	26.5	44.468	378	19	12	16	1.2994e-113	18.8	17.2	25.1	695440000	230100000	227460000	237890000	36602000	12110000	11971000	12520000
710	ENSMMUP00000004155;ENSMMUP00000004153;ENSMMUP00000004154;ENSMMUP00000004161	ENSMMUP00000004155	ENSMMUT00000004405	ENSMMUG00000003106	ENSMMUP00000004155|ENSMMUT00000004405|ENSMMUG00000003106|SEC16A|SEC16 homolog A (S. cerevisiae) [Source:HGNC Symbol;Acc:29006];	ENSP00000325827	ENSG00000148396	SEC16A	SEC16 homolog A (S. cerevisiae) [Source:HGNC Symbol;Acc:29006]	ortholog_one2one				5	5	4	4	3	YES	YES	4	4	3	5.8	5.8	231.45	2165	9	10	9	1.7227e-88	4.5	4.7	3.4	132450000	31022000	55562000	45866000	1471700	344690	617350	509620
711	ENSMMUP00000031438;ENSMMUP00000031436;ENSMMUP00000031437;ENSMMUP00000031435;ENSMMUP00000031433;ENSMMUP00000004166;ENSMMUP00000031434;ENSMMUP00000031439	ENSMMUP00000031438	ENSMMUT00000038338	ENSMMUG00000003115	ENSMMUP00000031438|ENSMMUT00000038338|ENSMMUG00000003115|LOC723255;	ENSP00000445135	ENSG00000022556	NLRP2	NLR family, pyrin domain containing 2 [Source:HGNC Symbol;Acc:22948]	ortholog_one2one	ENSMUSP00000063325	ENSMUSG00000020777	ortholog_one2one	6	6	4	5	2	YES	YES	4	5	2	6.5	6.5	120.52	1061	5	8	3	3.6599e-12	4.8	5.6	2.8	69202000	22494000	18729000	27979000	1048500	340820	283780	423930
714	ENSMMUP00000004174	ENSMMUP00000004174	ENSMMUT00000004424	ENSMMUG00000003120	ENSMMUP00000004174|ENSMMUT00000004424|ENSMMUG00000003120|HECTD1|HECT domain containing 1 [Source:HGNC Symbol;Acc:20157]	ENSP00000382269	ENSG00000092148	HECTD1	HECT domain containing E3 ubiquitin protein ligase 1 [Source:HGNC Symbol;Acc:20157]	ortholog_one2one				6	6	5	4	6	YES	YES	5	4	6	3.6	3.6	236.63	2125	10	13	10	2.6191e-105	3.1	2.5	3.6	46501000	11097000	24482000	10922000	400870	95665	211050	94157
715	ENSMMUP00000004177	ENSMMUP00000004177	ENSMMUT00000004427	ENSMMUG00000003122	ENSMMUP00000004177|ENSMMUT00000004427|ENSMMUG00000003122|CHKB|choline kinase beta [Source:HGNC Symbol;Acc:1938]									2	2	2	1	2	YES	YES	2	1	2	6.1	6.1	45.298	396	2	1	5	5.0166e-06	6.1	2.8	6.1	23814000	9822600	7089000	6902600	992260	409270	295370	287610
717	ENSMMUP00000004182	ENSMMUP00000004182	ENSMMUT00000004433	ENSMMUG00000003128	ENSMMUP00000004182|ENSMMUT00000004433|ENSMMUG00000003128|LIMK1|LIM domain kinase 1 [Source:HGNC Symbol;Acc:6613]									2	2	1	2	2	YES	YES	1	2	2	4.9	4.9	72.341	647	1	2	2	2.3268e-05	2.3	4.9	4.9	11790000	3856300	4301100	3632500	327500	107120	119470	100900
718	ENSMMUP00000004184	ENSMMUP00000004184	ENSMMUT00000004435	ENSMMUG00000003130	ENSMMUP00000004184|ENSMMUT00000004435|ENSMMUG00000003130|RAD50|RAD50 homolog (S. cerevisiae) [Source:HGNC Symbol;Acc:9816]	ENSP00000265335	ENSG00000113522	RAD50	RAD50 homolog (S. cerevisiae) [Source:HGNC Symbol;Acc:9816]	ortholog_one2one				12	12	10	10	11	YES	YES	10	10	11	13.2	13.2	153.89	1312	25	26	26	0	10.7	10.7	12.4	391330000	127130000	156080000	108120000	4034300	1310600	1609100	1114600
719	ENSMMUP00000004193;ENSMMUP00000041217	ENSMMUP00000004193	ENSMMUT00000004444	ENSMMUG00000003136	ENSMMUP00000004193|ENSMMUT00000004444|ENSMMUG00000003136|MBD2|methyl-CpG binding domain protein 2 [Source:HGNC Symbol;Acc:6917];	ENSP00000256429	ENSG00000134046	MBD2	methyl-CpG binding domain protein 2 [Source:HGNC Symbol;Acc:6917]	ortholog_one2one				2	2	2	2	2	YES	YES	2	2	2	6.8	6.8	43.334	412	3	3	3	1.0609e-08	6.8	6.8	6.8	42056000	25390000	8889600	7777300	2002700	1209000	423310	370350
720	ENSMMUP00000004209;ENSMMUP00000004210;ENSMMUP00000004817;ENSMMUP00000004211	ENSMMUP00000004209	ENSMMUT00000004460	ENSMMUG00000003146	ENSMMUP00000004209|ENSMMUT00000004460|ENSMMUG00000003146|PDLIM7|PDZ and LIM domain 7 (enigma) [Source:HGNC Symbol;Acc:22958];	ENSP00000348099	ENSG00000196923	PDLIM7	PDZ and LIM domain 7 (enigma) [Source:HGNC Symbol;Acc:22958]	ortholog_one2one				7	7	5	6	6	YES	YES	5	6	6	41	41	37.839	351	14	14	16	1.9897e-36	21.4	32.2	38.2	779700000	316590000	219610000	243510000	32487000	13191000	9150300	10146000
724	ENSMMUP00000004237;ENSMMUP00000018368	ENSMMUP00000004237	ENSMMUT00000004489	ENSMMUG00000013973	ENSMMUP00000004237|ENSMMUT00000004489|ENSMMUG00000013973|CCT4|chaperonin containing TCP1, subunit 4 (delta) [Source:HGNC Symbol;Acc:1617];	ENSP00000377958	ENSG00000115484	CCT4	chaperonin containing TCP1, subunit 4 (delta) [Source:HGNC Symbol;Acc:1617]	ortholog_one2one				13	13	11	13	9	YES	YES	11	13	9	42.3	42.3	53.657	497	52	64	57	1.0126e-232	34.2	42.3	29.2	2541800000	746390000	975310000	820060000	74758000	21953000	28686000	24119000
725	ENSMMUP00000004242;ENSMMUP00000004241;ENSMMUP00000032325	ENSMMUP00000004242	ENSMMUT00000004495	ENSMMUG00000003174	ENSMMUP00000004242|ENSMMUT00000004495|ENSMMUG00000003174|FUK|fucokinase [Source:HGNC Symbol;Acc:29500];	ENSP00000288078	ENSG00000157353	FUK	fucokinase [Source:HGNC Symbol;Acc:29500]	ortholog_one2one				10	10	7	7	5	YES	YES	7	7	5	14.7	14.7	118.81	1093	12	9	8	2.8908e-56	11.1	9.6	7.1	128840000	56132000	33521000	39186000	2477700	1079500	644640	753580
726	ENSMMUP00000004244;ENSMMUP00000025137	ENSMMUP00000004244	ENSMMUT00000004497	ENSMMUG00000003176	ENSMMUP00000004244|ENSMMUT00000004497|ENSMMUG00000003176|DNAJB6|DnaJ (Hsp40) homolog, subfamily B, member 6 [Source:HGNC Symbol;Acc:14888];	ENSP00000262177	ENSG00000105993	DNAJB6	DnaJ (Hsp40) homolog, subfamily B, member 6 [Source:HGNC Symbol;Acc:14888]	ortholog_one2one				2	2	2	2	2	YES	YES	2	2	2	10.7	10.7	36.121	326	4	3	2	7.3313e-07	10.7	10.7	10.7	47054000	21322000	15571000	10160000	3136900	1421500	1038100	677330
727	ENSMMUP00000004250	ENSMMUP00000004250	ENSMMUT00000004505	ENSMMUG00000003184	ENSMMUP00000004250|ENSMMUT00000004505|ENSMMUG00000003184|SEC23A|Sec23 homolog A (S. cerevisiae) [Source:HGNC Symbol;Acc:10701]	ENSP00000306881	ENSG00000100934	SEC23A	Sec23 homolog A (S. cerevisiae) [Source:HGNC Symbol;Acc:10701]	ortholog_one2one				16	12	14	13	11	YES	YES	10	9	9	28.2	24.3	86.146	765	47	45	40	0	25	23.3	22.5	1966300000	619810000	724820000	621700000	50419000	15893000	18585000	15941000
728	ENSMMUP00000004251;ENSMMUP00000026308	ENSMMUP00000004251	ENSMMUT00000004508	ENSMMUG00000003187	ENSMMUP00000004251|ENSMMUT00000004508|ENSMMUG00000003187|HMGB2|high-mobility group box 2 [Source:HGNC Symbol;Acc:5000];	ENSP00000296503	ENSG00000164104	HMGB2	high mobility group box 2 [Source:HGNC Symbol;Acc:5000]	apparent_ortholog_one2one				3	2	2	2	3	YES	YES	1	1	2	13.7	7.8	23.473	205	4	2	5	5.359e-21	13.7	13.7	13.7	11820000	6408400	2922200	2489400	985000	534040	243510	207450
729	ENSMMUP00000004252	ENSMMUP00000004252	ENSMMUT00000004510	ENSMMUG00000003189	ENSMMUP00000004252|ENSMMUT00000004510|ENSMMUG00000003189|Q9N0U4_MACMU|Peptidyl-prolyl cis-trans isomerase Fragment (EC 5.2.1.8) [Source:UniProtKB/TrEMBL;Acc:Q9N0U4]	ENSP00000225174	ENSG00000108179	PPIF	peptidylprolyl isomerase F [Source:HGNC Symbol;Acc:9259]	ortholog_one2one				3	3	3	2	2	YES	YES	3	2	2	31.4	31.4	21.949	207	3	3	2	1.5316e-94	31.4	18.4	18.4	55935000	19491000	20316000	16128000	3496000	1218200	1269800	1008000
731	ENSMMUP00000004265	ENSMMUP00000004265	ENSMMUT00000004524	ENSMMUG00000003193	ENSMMUP00000004265|ENSMMUT00000004524|ENSMMUG00000003193|VIM|vimentin [Source:HGNC Symbol;Acc:12692]	ENSP00000446007	ENSG00000026025	VIM	vimentin [Source:HGNC Symbol;Acc:12692]	ortholog_one2one				40	4	37	38	28	YES	YES	4	4	4	69.3	11	53.32	463	620	609	479	0	66.5	64.1	52.3	90543000000	38338000000	30900000000	21304000000	2663000000	1127600000	908820000	626600000
732	ENSMMUP00000004266	ENSMMUP00000004266	ENSMMUT00000004526	ENSMMUG00000003193	ENSMMUP00000004266|ENSMMUT00000004526|ENSMMUG00000003193|VIM|vimentin [Source:HGNC Symbol;Acc:12692]	ENSP00000446007	ENSG00000026025	VIM	vimentin [Source:HGNC Symbol;Acc:12692]	ortholog_one2one				37	1	34	35	25	YES	YES	1	1	1	78.4	3.7	43.394	379	3	3	3	0	74.9	72	57.5	64265000	15149000	30123000	18992000	2295200	541040	1075800	678290
733	ENSMMUP00000004269;ENSMMUP00000027133;ENSMMUP00000027134;ENSMMUP00000039603	ENSMMUP00000004269	ENSMMUT00000004529	ENSMMUG00000003197	ENSMMUP00000004269|ENSMMUT00000004529|ENSMMUG00000003197|NIPSNAP3A|nipsnap homolog 3A (C. elegans) [Source:HGNC Symbol;Acc:23619]	ENSP00000363899	ENSG00000136783	NIPSNAP3A	nipsnap homolog 3A (C. elegans) [Source:HGNC Symbol;Acc:23619]	ortholog_one2one				9	9	7	8	8	YES	YES	7	8	8	44.7	44.7	28.312	246	34	27	31	1.1225e-119	44.7	44.7	41.1	1038100000	491600000	318860000	227600000	69204000	32774000	21257000	15174000
734	ENSMMUP00000004293;ENSMMUP00000004294;ENSMMUP00000035612;ENSMMUP00000028717	ENSMMUP00000004293	ENSMMUT00000004555	ENSMMUG00000003213	ENSMMUP00000004293|ENSMMUT00000004555|ENSMMUG00000003213|LOC723347;	ENSP00000331342	ENSG00000156675	RAB11FIP1	RAB11 family interacting protein 1 (class I) [Source:HGNC Symbol;Acc:30265]	ortholog_one2one				6	6	5	2	3	YES	YES	5	2	3	10.1	10.1	135.91	1275	10	8	9	6.348e-32	8.4	3.4	5.1	172740000	59859000	52476000	60407000	2741900	950140	832960	958840
739	ENSMMUP00000004328	ENSMMUP00000004328	ENSMMUT00000004594	ENSMMUG00000003245	ENSMMUP00000004328|ENSMMUT00000004594|ENSMMUG00000003245|RASA1|RAS p21 protein activator (GTPase activating protein) 1 [Source:HGNC Symbol;Acc:9871]	ENSP00000274376	ENSG00000145715	RASA1	RAS p21 protein activator (GTPase activating protein) 1 [Source:HGNC Symbol;Acc:9871]	ortholog_one2one				6	6	4	6	4	YES	YES	4	6	4	8.6	8.6	115.85	1040	8	11	9	1.9844e-63	5.1	8.6	7.4	230810000	54574000	86285000	89955000	4049400	957430	1513800	1578200
740	ENSMMUP00000004348;ENSMMUP00000038493	ENSMMUP00000004348	ENSMMUT00000004614	ENSMMUG00000003262	ENSMMUP00000004348|ENSMMUT00000004614|ENSMMUG00000003262|PCCB;	ENSP00000419027	ENSG00000114054	PCCB	propionyl CoA carboxylase, beta polypeptide [Source:HGNC Symbol;Acc:8654]	ortholog_one2one				8	8	6	8	6	YES	YES	6	8	6	24.5	24.5	58.188	539	18	21	17	4.4941e-211	17.8	24.5	18.2	327390000	92538000	129030000	105820000	9629000	2721700	3794900	3112500
741	ENSMMUP00000040008;ENSMMUP00000004351;ENSMMUP00000040006;ENSMMUP00000004352	ENSMMUP00000040008	ENSMMUT00000046978	ENSMMUG00000003265	ENSMMUP00000040008|ENSMMUT00000046978|ENSMMUG00000003265|LEPR_MACMU|Leptin receptor Precursor (LEP-R)(OB receptor)(OB-R)(CD295 antigen) [Source:UniProtKB/Swiss-Prot;Acc:Q9MYL0];	ENSP00000330393	ENSG00000116678	LEPR	leptin receptor [Source:HGNC Symbol;Acc:6554]	ortholog_one2one				2	2	2	1	1	YES	YES	2	1	1	2.7	2.7	135.87	1194	4	1	2	9.0009e-10	2.7	1.7	1.7	14051000	6161000	3408300	4481700	226630	99371	54972	72286
742	ENSMMUP00000004353	ENSMMUP00000004353	ENSMMUT00000004619	ENSMMUG00000003266	ENSMMUP00000004353|ENSMMUT00000004619|ENSMMUG00000003266|SERPINA7|serpin peptidase inhibitor, clade A (alpha-1 antiproteinase, antitrypsin), member 7 [Source:HGNC Symbol;Acc:11583]	ENSP00000329374	ENSG00000123561	SERPINA7	serpin peptidase inhibitor, clade A (alpha-1 antiproteinase, antitrypsin), member 7 [Source:HGNC Symbol;Acc:11583]	ortholog_one2one				5	5	3	3	3	YES	YES	3	3	3	19.2	19.2	42.7	380	9	9	9	5.519e-40	10.5	12.9	12.1	180090000	64142000	62349000	53602000	8575900	3054400	2969000	2552500
744	ENSMMUP00000004363;ENSMMUP00000040441;ENSMMUP00000004357	ENSMMUP00000004363	ENSMMUT00000004629	ENSMMUG00000003269	ENSMMUP00000004363|ENSMMUT00000004629|ENSMMUG00000003269|PHC2|polyhomeotic homolog 2 (Drosophila) [Source:HGNC Symbol;Acc:3183];	ENSP00000257118	ENSG00000134686	PHC2	polyhomeotic homolog 2 (Drosophila) [Source:HGNC Symbol;Acc:3183]	ortholog_one2one				3	3	3	2	3	YES	YES	3	2	3	4.3	4.3	90.609	859	5	4	5	4.5874e-43	4.3	3.1	4.3	100860000	38084000	35908000	26871000	2654300	1002200	944940	707130
745	ENSMMUP00000004364	ENSMMUP00000004364	ENSMMUT00000004630	ENSMMUG00000003273	ENSMMUP00000004364|ENSMMUT00000004630|ENSMMUG00000003273|BCAM|basal cell adhesion molecule (Lutheran blood group) [Source:HGNC Symbol;Acc:6722]	ENSP00000270233	ENSG00000187244	BCAM	basal cell adhesion molecule (Lutheran blood group) [Source:HGNC Symbol;Acc:6722]	ortholog_one2one				6	6	4	5	5	YES	YES	4	5	5	16.2	16.2	55.322	507	10	9	9	9.9886e-20	10.7	13.2	13.6	104350000	36569000	41271000	26506000	3478200	1219000	1375700	883550
746	ENSMMUP00000004369	ENSMMUP00000004369	ENSMMUT00000004635	ENSMMUG00000003277	ENSMMUP00000004369|ENSMMUT00000004635|ENSMMUG00000003277|LOC717868	ENSP00000421705	ENSG00000196353	CPNE4	copine IV [Source:HGNC Symbol;Acc:2317]	ortholog_one2one				2	1	2	2	2	YES	YES	1	1	1	3.2	1.6	62.263	557	2	2	2	8.2827e-30	3.2	3.2	3.2	11121000	5982200	2655100	2484000	370710	199410	88504	82802
748	ENSMMUP00000004385	ENSMMUP00000004385	ENSMMUT00000004651	ENSMMUG00000003294	ENSMMUP00000004385|ENSMMUT00000004651|ENSMMUG00000003294|ENDOG|endonuclease G [Source:HGNC Symbol;Acc:3346]	ENSP00000361725	ENSG00000167136	ENDOG	endonuclease G [Source:HGNC Symbol;Acc:3346]	ortholog_one2one				4	4	4	3	3	YES	YES	4	3	3	21.8	21.8	30.602	280	7	5	5	8.629e-22	21.8	18.2	18.2	102790000	41172000	34897000	26721000	5710500	2287300	1938700	1484500
749	ENSMMUP00000004386;ENSMMUP00000040980;ENSMMUP00000026556;ENSMMUP00000038161;ENSMMUP00000037217	ENSMMUP00000004386	ENSMMUT00000004652	ENSMMUG00000003295	ENSMMUP00000004386|ENSMMUT00000004652|ENSMMUG00000003295|NP_001138538.1|ribosomal protein S4, Y-linked 2 [Source:RefSeq peptide;Acc:NP_001138538];	ENSP00000362744	ENSG00000198034	RPS4X	ribosomal protein S4, X-linked [Source:HGNC Symbol;Acc:10424]	ortholog_one2one				4	4	4	4	4	YES	YES	4	4	4	14.4	14.4	29.597	263	10	10	11	4.5534e-46	14.4	14.4	14.4	200680000	53116000	88176000	59385000	9556100	2529300	4198900	2827800
750	ENSMMUP00000004395;ENSMMUP00000004394;ENSMMUP00000004397;ENSMMUP00000004396	ENSMMUP00000004395	ENSMMUT00000004661	ENSMMUG00000003298	ENSMMUP00000004395|ENSMMUT00000004661|ENSMMUG00000003298|ATXN2L|ataxin 2-like [Source:HGNC Symbol;Acc:31326];	ENSP00000378917	ENSG00000168488	ATXN2L	ataxin 2-like [Source:HGNC Symbol;Acc:31326]	ortholog_one2one				5	5	1	4	2	YES	YES	1	4	2	9.1	9.1	109.8	1042	9	10	9	1.706e-21	2	7.7	3.5	195930000	13724000	45238000	136970000	4452900	311900	1028100	3112900
751	ENSMMUP00000004400	ENSMMUP00000004400	ENSMMUT00000004666	ENSMMUG00000003303	ENSMMUP00000004400|ENSMMUT00000004666|ENSMMUG00000003303|TUFM|Tu translation elongation factor, mitochondrial [Source:HGNC Symbol;Acc:12420]	ENSP00000322439	ENSG00000178952	TUFM	Tu translation elongation factor, mitochondrial [Source:HGNC Symbol;Acc:12420]	ortholog_one2one				15	15	13	12	10	YES	YES	13	12	10	42.2	42.2	49.946	455	48	47	39	2.5093e-91	32.5	34.5	29	3394200000	1162800000	1160300000	1071100000	106070000	36338000	36258000	33472000
752	ENSMMUP00000004406;ENSMMUP00000028101	ENSMMUP00000004406	ENSMMUT00000004672	ENSMMUG00000003304	ENSMMUP00000004406|ENSMMUT00000004672|ENSMMUG00000003304|EPHB3|EPH receptor B3 [Source:HGNC Symbol;Acc:3394];	ENSP00000332118	ENSG00000182580	EPHB3	EPH receptor B3 [Source:HGNC Symbol;Acc:3394]	ortholog_one2one				2	0	1	1	2	YES	YES	0	0	0	3.5	0	110.23	997			1	6.4985e-09	1.6	1.6	3.5	3526300	0	0	3526300	59767	0	0	59767
753	ENSMMUP00000004407	ENSMMUP00000004407	ENSMMUT00000004673	ENSMMUG00000003305	ENSMMUP00000004407|ENSMMUT00000004673|ENSMMUG00000003305|TAF15|TAF15 RNA polymerase II, TATA box binding protein (TBP)-associated factor, 68kDa [Source:HGNC Symbol;Acc:11547]	ENSP00000466950	ENSG00000172660	TAF15	TAF15 RNA polymerase II, TATA box binding protein (TBP)-associated factor, 68kDa [Source:HGNC Symbol;Acc:11547]	ortholog_one2one				4	3	4	4	4	YES	YES	3	3	3	12.5	12.5	61.932	592	8	8	13	3.335e-69	12.5	12.5	12.5	488150000	158390000	200270000	129480000	12846000	4168300	5270400	3407300
754	ENSMMUP00000011419;ENSMMUP00000004412	ENSMMUP00000011419	ENSMMUT00000012174	ENSMMUG00000008711	ENSMMUP00000011419|ENSMMUT00000012174|ENSMMUG00000008711|CHI3L1|chitinase 3-like 1 (cartilage glycoprotein-39) [Source:HGNC Symbol;Acc:1932];	ENSP00000255409	ENSG00000133048	CHI3L1	chitinase 3-like 1 (cartilage glycoprotein-39) [Source:HGNC Symbol;Acc:1932]	ortholog_one2one	ENSMUSP00000097919	ENSMUSG00000018411	ortholog_one2one	5	5	5	5	2	YES	YES	5	5	2	14.4	14.4	42.56	383	11	13	9	8.6803e-64	14.4	14.4	7.6	152290000	54452000	73324000	24514000	6922300	2475100	3332900	1114300
755	ENSMMUP00000004414;ENSMMUP00000004413	ENSMMUP00000004414	ENSMMUT00000004681	ENSMMUG00000003310	ENSMMUP00000004414|ENSMMUT00000004681|ENSMMUG00000003310|TTC7A|tetratricopeptide repeat domain 7A [Source:HGNC Symbol;Acc:19750];	ENSP00000316699	ENSG00000068724	TTC7A	tetratricopeptide repeat domain 7A [Source:HGNC Symbol;Acc:19750]	ortholog_one2one				2	2	1	2	2	YES	YES	1	2	2	4.6	4.6	82.219	738	1	3	2	1.3896e-08	2.3	4.6	4.6	7669800	400940	2997600	4271300	178370	9324.1	69711	99333
756	ENSMMUP00000004415	ENSMMUP00000004415	ENSMMUT00000004682	ENSMMUG00000003311	ENSMMUP00000004415|ENSMMUT00000004682|ENSMMUG00000003311|Q3YAL1_MACMU|Methylosome protein 50 Fragment [Source:UniProtKB/TrEMBL;Acc:Q3YAL1]	ENSP00000235090	ENSG00000116455	WDR77	WD repeat domain 77 [Source:HGNC Symbol;Acc:29652]	ortholog_one2one				2	2	2	2	2	YES	YES	2	2	2	6.1	6.1	36.829	342	10	8	3	3.0769e-83	6.1	6.1	6.1	79397000	26818000	34384000	18195000	6616400	2234800	2865300	1516300
757	ENSMMUP00000004417;ENSMMUP00000018617	ENSMMUP00000004417	ENSMMUT00000004684	ENSMMUG00000003313	ENSMMUP00000004417|ENSMMUT00000004684|ENSMMUG00000003313|XM_001093831.1									5	5	4	4	2	YES	YES	4	4	2	29.3	29.3	28.776	256	14	15	13	3.4927e-44	23.4	23	12.5	481320000	257510000	66975000	156830000	28313000	15148000	3939700	9225300
758	ENSMMUP00000004423;ENSMMUP00000004422	ENSMMUP00000004423	ENSMMUT00000004690	ENSMMUG00000003316	ENSMMUP00000004423|ENSMMUT00000004690|ENSMMUG00000003316|MAN2A1|mannosidase, alpha, class 2A, member 1 [Source:HGNC Symbol;Acc:6824];	ENSP00000261483	ENSG00000112893	MAN2A1	mannosidase, alpha, class 2A, member 1 [Source:HGNC Symbol;Acc:6824]	ortholog_one2one				8	8	6	6	5	YES	YES	6	6	5	9.6	9.6	132.68	1151	12	12	10	1.4866e-47	7.5	6.3	5.7	117560000	32618000	49604000	35339000	1927200	534720	813180	579330
759	ENSMMUP00000004433	ENSMMUP00000004433	ENSMMUT00000004700	ENSMMUG00000003325	ENSMMUP00000004433|ENSMMUT00000004700|ENSMMUG00000003325|PNPO|pyridoxamine 5-phosphate oxidase [Source:HGNC Symbol;Acc:30260]	ENSP00000225573	ENSG00000108439	PNPO	pyridoxamine 5'-phosphate oxidase [Source:HGNC Symbol;Acc:30260]	ortholog_one2one				4	4	2	4	2	YES	YES	2	4	2	23.4	23.4	30.095	261	3	7	3	7.8019e-37	14.2	23.4	14.2	193660000	79598000	79054000	35009000	13833000	5685600	5646700	2500600
761	ENSMMUP00000004441;ENSMMUP00000004444;ENSMMUP00000004445;ENSMMUP00000035251	ENSMMUP00000004441	ENSMMUT00000004709	ENSMMUG00000003333	ENSMMUP00000004441|ENSMMUT00000004709|ENSMMUG00000003333|ANTXR2|anthrax toxin receptor 2 [Source:HGNC Symbol;Acc:21732];	ENSP00000306185	ENSG00000163297	ANTXR2	anthrax toxin receptor 2 [Source:HGNC Symbol;Acc:21732]	ortholog_one2one				4	3	1	1	4	YES	YES	1	1	3	6.5	4.1	53.969	489	1	1	6	2.1743e-14	2	2	6.5	7071600	1112100	938730	5020800	252560	39717	33526	179310
764	ENSMMUP00000004458;ENSMMUP00000032109	ENSMMUP00000004458	ENSMMUT00000004729	ENSMMUG00000003347	ENSMMUP00000004458|ENSMMUT00000004729|ENSMMUG00000003347|PCMTD1|protein-L-isoaspartate (D-aspartate) O-methyltransferase domain containing 1 [Source:HGNC Symbol;Acc:30483];	ENSP00000353739	ENSG00000168300	PCMTD1	protein-L-isoaspartate (D-aspartate) O-methyltransferase domain containing 1 [Source:HGNC Symbol;Acc:30483]	ortholog_one2one				2	2	1	2	2	YES	YES	1	2	2	10.6	10.6	40.671	357	3	6	9	2.0261e-23	5	10.6	10.6	35929000	5428800	15205000	15295000	1633100	246760	691140	695220
765	ENSMMUP00000004463;ENSMMUP00000004462;ENSMMUP00000004460	ENSMMUP00000004463	ENSMMUT00000004734	ENSMMUG00000003349	ENSMMUP00000004463|ENSMMUT00000004734|ENSMMUG00000003349|TOM1L2|target of myb1-like 2 (chicken) [Source:HGNC Symbol;Acc:11984];	ENSP00000368818	ENSG00000175662	TOM1L2	target of myb1-like 2 (chicken) [Source:HGNC Symbol;Acc:11984]	ortholog_one2one				6	6	4	3	4	YES	YES	4	3	4	20.5	20.5	55.559	507	5	5	6	2.4209e-50	10.7	9.5	13.4	105130000	20830000	23014000	61287000	4778700	946820	1046100	2785800
766	ENSMMUP00000004469;ENSMMUP00000036719	ENSMMUP00000004469	ENSMMUT00000004741	ENSMMUG00000003355	ENSMMUP00000004469|ENSMMUT00000004741|ENSMMUG00000003355|LOC717510;	ENSP00000237822	ENSG00000118961	C2orf43	chromosome 2 open reading frame 43 [Source:HGNC Symbol;Acc:26145]	ortholog_one2one				3	3	1	2	2	YES	YES	1	2	2	12	12	37.407	325	3	4	4	4.946e-08	3.1	8.3	6.8	112250000	14767000	12063000	85419000	5907800	777210	634870	4495800
767	ENSMMUP00000039770;ENSMMUP00000004474;ENSMMUP00000004472;ENSMMUP00000004476;ENSMMUP00000039765;ENSMMUP00000004470	ENSMMUP00000039770	ENSMMUT00000046742	ENSMMUG00000003356	ENSMMUP00000039770|ENSMMUT00000046742|ENSMMUG00000003356|TNC|tenascin C [Source:HGNC Symbol;Acc:5318];	ENSP00000265131	ENSG00000041982	TNC	tenascin C [Source:HGNC Symbol;Acc:5318]	ortholog_one2one				7	7	4	4	6	YES	YES	4	4	6	4.7	4.7	201.63	1838	8	4	9	3.3822e-29	2.9	2.2	3.9	17577000	6775400	3581700	7219600	174030	67083	35463	71481
768	ENSMMUP00000004489;ENSMMUP00000010922	ENSMMUP00000004489	ENSMMUT00000004763	ENSMMUG00000008331	ENSMMUP00000004489|ENSMMUT00000004763|ENSMMUG00000008331|PLXNB2|plexin B2 [Source:HGNC Symbol;Acc:9104];	ENSP00000409171	ENSG00000196576	PLXNB2	plexin B2 [Source:HGNC Symbol;Acc:9104]	ortholog_one2one				14	13	11	11	10	YES	YES	10	10	9	12	11.6	205.53	1844	22	23	17	5.9703e-242	10.3	9	8.1	388550000	196920000	116950000	74679000	3736000	1893500	1124500	718070
770	ENSMMUP00000004496	ENSMMUP00000004496	ENSMMUT00000004770	ENSMMUG00000003374	ENSMMUP00000004496|ENSMMUT00000004770|ENSMMUG00000003374|IDH3G|isocitrate dehydrogenase 3 (NAD+) gamma [Source:HGNC Symbol;Acc:5386]	ENSP00000217901	ENSG00000067829	IDH3G	isocitrate dehydrogenase 3 (NAD+) gamma [Source:HGNC Symbol;Acc:5386]	apparent_ortholog_one2one				4	4	3	3	2	YES	YES	3	3	2	25.8	25.8	39.165	364	5	3	5	8.2784e-48	19.5	17.3	11	207170000	69900000	52403000	84872000	12187000	4111800	3082500	4992500
771	ENSMMUP00000004497	ENSMMUP00000004497	ENSMMUT00000004771	ENSMMUG00000003375	ENSMMUP00000004497|ENSMMUT00000004771|ENSMMUG00000003375|SSR4|signal sequence receptor, delta (translocon-associated protein delta) [Source:HGNC Symbol;Acc:11326]	ENSP00000317331	ENSG00000180879	SSR4	signal sequence receptor, delta [Source:HGNC Symbol;Acc:11326]	ortholog_one2one				2	2	2	2	2	YES	YES	2	2	2	17.3	17.3	19.089	173	19	23	18	5.9051e-43	17.3	17.3	17.3	1923600000	558380000	707290000	657940000	213730000	62042000	78588000	73105000
772	ENSMMUP00000004502;ENSMMUP00000004504	ENSMMUP00000004502	ENSMMUT00000004776	ENSMMUG00000003378	ENSMMUP00000004502|ENSMMUT00000004776|ENSMMUG00000003378|ACTR5|ARP5 actin-related protein 5 homolog (yeast) [Source:HGNC Symbol;Acc:14671]	ENSP00000243903	ENSG00000101442	ACTR5	ARP5 actin-related protein 5 homolog (yeast) [Source:HGNC Symbol;Acc:14671]	ortholog_one2one				3	3	1	2	2	YES	YES	1	2	2	9.2	9.2	68.271	607	1	3	2	3.972e-08	2.6	6.4	5.4	7413300	1088100	4924400	1400800	264760	38862	175870	50027
773	ENSMMUP00000004514;ENSMMUP00000004512;ENSMMUP00000037343;ENSMMUP00000004518	ENSMMUP00000004514	ENSMMUT00000004788	ENSMMUG00000003386	ENSMMUP00000004514|ENSMMUT00000004788|ENSMMUG00000003386|LRRFIP1|leucine rich repeat (in FLII) interacting protein 1 [Source:HGNC Symbol;Acc:6702];	ENSP00000375857	ENSG00000124831	LRRFIP1	leucine rich repeat (in FLII) interacting protein 1 [Source:HGNC Symbol;Acc:6702]	ortholog_one2one				4	4	3	2	3	YES	YES	3	2	3	6.1	6.1	88.637	808	5	4	6	7.184e-41	3.7	3.5	5.8	75939000	13505000	25028000	37407000	1852200	329380	610430	912360
774	ENSMMUP00000004529;ENSMMUP00000004530	ENSMMUP00000004529	ENSMMUT00000004803	ENSMMUG00000003396	ENSMMUP00000004529|ENSMMUT00000004803|ENSMMUG00000003396|YAP1|Yes-associated protein 1 [Source:HGNC Symbol;Acc:16262];	ENSP00000282441	ENSG00000137693	YAP1	Yes-associated protein 1 [Source:HGNC Symbol;Acc:16262]	ortholog_one2one				6	6	4	5	6	YES	YES	4	5	6	22.6	22.6	54.429	504	17	25	13	1.8053e-100	11.3	15.3	22.6	627390000	251730000	214670000	160990000	31369000	12587000	10734000	8049300
775	ENSMMUP00000004532	ENSMMUP00000004532	ENSMMUT00000004806	ENSMMUG00000003397	ENSMMUP00000004532|ENSMMUT00000004806|ENSMMUG00000003397|AK7|adenylate kinase 7 [Source:HGNC Symbol;Acc:20091]	ENSP00000267584	ENSG00000140057	AK7	adenylate kinase 7 [Source:HGNC Symbol;Acc:20091]	ortholog_one2one				2	2	2	2	2	YES	YES	2	2	2	4.1	4.1	82.851	723	4	3	3	4.3955e-05	4.1	4.1	4.1	247150000	94612000	100010000	52526000	5492200	2102500	2222500	1167200
777	ENSMMUP00000004552;ENSMMUP00000013528;ENSMMUP00000021320;ENSMMUP00000015564;ENSMMUP00000015565	ENSMMUP00000004552	ENSMMUT00000004826	ENSMMUG00000003411	ENSMMUP00000004552|ENSMMUT00000004826|ENSMMUG00000003411|LOC723099;									3	3	2	2	3	YES	YES	2	2	3	19	19	11.784	105	6	7	7	8.6669e-66	10.5	10.5	19	572370000	199640000	237700000	135030000	81768000	28521000	33957000	19290000
778	ENSMMUP00000004553;ENSMMUP00000037997;ENSMMUP00000004554;ENSMMUP00000004555;ENSMMUP00000004556	ENSMMUP00000004553	ENSMMUT00000004828	ENSMMUG00000003410	ENSMMUP00000004553|ENSMMUT00000004828|ENSMMUG00000003410|PIGT|phosphatidylinositol glycan anchor biosynthesis, class T [Source:HGNC Symbol;Acc:14938];	ENSP00000279036	ENSG00000124155	PIGT	phosphatidylinositol glycan anchor biosynthesis, class T [Source:HGNC Symbol;Acc:14938]	ortholog_one2one				4	4	4	3	3	YES	YES	4	3	3	11.8	11.8	65.863	578	10	7	9	5.4164e-92	11.8	8.8	9.7	103600000	51274000	26766000	25560000	3047100	1508100	787240	751760
779	ENSMMUP00000004558;ENSMMUP00000007776;ENSMMUP00000007777;ENSMMUP00000007782;ENSMMUP00000007780;ENSMMUP00000007778;ENSMMUP00000007783	ENSMMUP00000004558	ENSMMUT00000004836	ENSMMUG00000005914	ENSMMUP00000004558|ENSMMUT00000004836|ENSMMUG00000005914|ABCC1|ATP-binding cassette, sub-family C (CFTR/MRP), member 1 [Source:HGNC Symbol;Acc:51];									5	5	4	3	3	YES	YES	4	3	3	7	7	126.2	1133	5	4	5	3.9995e-32	5.6	4.5	3.7	84980000	38610000	19458000	26912000	1370600	622740	313840	434070
780	ENSMMUP00000004562	ENSMMUP00000004562	ENSMMUT00000004841	ENSMMUG00000003414	ENSMMUP00000004562|ENSMMUT00000004841|ENSMMUG00000003414|ABCC3|ATP-binding cassette, sub-family C (CFTR/MRP), member 3 [Source:HGNC Symbol;Acc:54]	ENSP00000285238	ENSG00000108846	ABCC3	ATP-binding cassette, sub-family C (CFTR/MRP), member 3 [Source:HGNC Symbol;Acc:54]	ortholog_one2one				6	6	5	5	5	YES	YES	5	5	5	6.3	6.3	169.23	1526	7	5	5	5.1475e-25	5.2	5.2	5.2	40276000	16003000	12076000	12197000	592290	235330	177590	179370
781	ENSMMUP00000004571	ENSMMUP00000004571	ENSMMUT00000004851	ENSMMUG00000003429	ENSMMUP00000004571|ENSMMUT00000004851|ENSMMUG00000003429|Q3YAP5_MACMU|Mitochondrial processing peptidase beta Fragment [Source:UniProtKB/TrEMBL;Acc:Q3YAP5]	ENSP00000249269	ENSG00000105819	PMPCB	peptidase (mitochondrial processing) beta [Source:HGNC Symbol;Acc:9119]	ortholog_one2one				4	4	4	2	3	YES	YES	4	2	3	17.2	17.2	37.395	337	7	6	7	3.5725e-49	17.2	8.3	16.9	150940000	49873000	44789000	56283000	10063000	3324900	2985900	3752200
782	ENSMMUP00000004572;ENSMMUP00000004574;ENSMMUP00000035010;ENSMMUP00000035009	ENSMMUP00000004572	ENSMMUT00000004852	ENSMMUG00000003430	ENSMMUP00000004572|ENSMMUT00000004852|ENSMMUG00000003430|DNAJC2|DnaJ (Hsp40) homolog, subfamily C, member 2 [Source:HGNC Symbol;Acc:13192];	ENSP00000368565	ENSG00000105821	DNAJC2	DnaJ (Hsp40) homolog, subfamily C, member 2 [Source:HGNC Symbol;Acc:13192]	ortholog_one2one				4	4	2	4	1	YES	YES	2	4	1	5.8	5.8	71.93	621	8	9	6	8.5498e-105	2.7	5.8	2.1	80206000	21600000	33338000	25268000	2291600	617150	952500	721960
783	ENSMMUP00000004576	ENSMMUP00000004576	ENSMMUT00000004856	ENSMMUG00000003432	ENSMMUP00000004576|ENSMMUT00000004856|ENSMMUG00000003432|PSMC2|proteasome (prosome, macropain) 26S subunit, ATPase, 2 [Source:HGNC Symbol;Acc:9548]	ENSP00000391211	ENSG00000161057	PSMC2	proteasome (prosome, macropain) 26S subunit, ATPase, 2 [Source:HGNC Symbol;Acc:9548]	ortholog_one2one				6	6	5	5	5	YES	YES	5	5	5	48.7	48.7	22.262	197	13	14	12	5.5409e-38	36	36	42.1	289430000	104200000	117160000	68067000	20673000	7442600	8368800	4861900
784	ENSMMUP00000004582	ENSMMUP00000004582	ENSMMUT00000004862	ENSMMUG00000003437	ENSMMUP00000004582|ENSMMUT00000004862|ENSMMUG00000003437|STAT5B|signal transducer and activator of transcription 5B [Source:HGNC Symbol;Acc:11367]									8	3	5	7	7	YES	YES	2	3	3	30.5	12.6	44.961	390	4	6	5	1.2836e-198	19.2	25.9	26.4	85063000	20588000	31243000	33233000	3544300	857820	1301800	1384700
785	ENSMMUP00000004583;ENSMMUP00000004584;ENSMMUP00000004585	ENSMMUP00000004583	ENSMMUT00000004863	ENSMMUG00000003439	ENSMMUP00000004583|ENSMMUT00000004863|ENSMMUG00000003439|NFIC|nuclear factor I/C (CCAAT-binding transcription factor) [Source:HGNC Symbol;Acc:7786];	ENSP00000465655	ENSG00000141905	NFIC	nuclear factor I/C (CCAAT-binding transcription factor) [Source:HGNC Symbol;Acc:7786]	ortholog_one2one				5	5	4	4	4	YES	YES	4	4	4	16.4	16.4	53.943	493	9	6	8	1.7666e-56	14.2	12	12	206480000	72187000	60211000	74086000	7941700	2776400	2315800	2849400
786	ENSMMUP00000004587	ENSMMUP00000004587	ENSMMUT00000004868	ENSMMUG00000003442	ENSMMUP00000004587|ENSMMUT00000004868|ENSMMUG00000003442|ZNF326|zinc finger protein 326 [Source:HGNC Symbol;Acc:14104]	ENSP00000340796	ENSG00000162664	ZNF326	zinc finger protein 326 [Source:HGNC Symbol;Acc:14104]	ortholog_one2one				4	1	4	3	3	YES	YES	1	0	1	19.6	5.1	42.715	373	10	3	6	2.3732e-30	19.6	14.5	15.3	229430000	114030000	33375000	82016000	13496000	6707900	1963300	4824400
787	ENSMMUP00000004588	ENSMMUP00000004588	ENSMMUT00000004869	ENSMMUG00000003443	ENSMMUP00000004588|ENSMMUT00000004869|ENSMMUG00000003443|VRK1|vaccinia related kinase 1 [Source:HGNC Symbol;Acc:12718]	ENSP00000216639	ENSG00000100749	VRK1	vaccinia related kinase 1 [Source:HGNC Symbol;Acc:12718]	ortholog_one2one				3	3	2	3	1	YES	YES	2	3	1	12.1	12.1	45.485	396	3	5	1	1.3615e-12	7.3	12.1	3.8	39132000	13905000	19785000	5442600	1565300	556180	791400	217710
789	ENSMMUP00000004590	ENSMMUP00000004590	ENSMMUT00000004871	ENSMMUG00000003442	ENSMMUP00000004590|ENSMMUT00000004871|ENSMMUG00000003442|ZNF326|zinc finger protein 326 [Source:HGNC Symbol;Acc:14104]	ENSP00000340796	ENSG00000162664	ZNF326	zinc finger protein 326 [Source:HGNC Symbol;Acc:14104]	ortholog_one2one				4	1	4	4	3	YES	YES	1	1	1	13.3	4	65.282	579	1	1	1	6.9746e-33	13.3	13.3	10.5	25722000	19693000	3676200	2352700	756540	579220	108120	69197
790	ENSMMUP00000004602	ENSMMUP00000004602	ENSMMUT00000004885	ENSMMUG00000003456	ENSMMUP00000004602|ENSMMUT00000004885|ENSMMUG00000003456|GPC4|glypican 4 [Source:HGNC Symbol;Acc:4452]	ENSP00000359864	ENSG00000076716	GPC4	glypican 4 [Source:HGNC Symbol;Acc:4452]	ortholog_one2one				3	3	3	3	1	YES	YES	3	3	1	7.9	7.9	62.468	556	9	9	6	3.586e-17	7.9	7.9	3.1	79240000	32698000	25000000	21542000	2141600	883730	675680	582210
791	ENSMMUP00000004604;ENSMMUP00000001447;ENSMMUP00000039831;ENSMMUP00000004603	ENSMMUP00000004604	ENSMMUT00000004887	ENSMMUG00000003457	ENSMMUP00000004604|ENSMMUT00000004887|ENSMMUG00000003457|PRKACB|protein kinase, cAMP-dependent, catalytic, beta [Source:HGNC Symbol;Acc:9381];	ENSP00000359719	ENSG00000142875	PRKACB	protein kinase, cAMP-dependent, catalytic, beta [Source:HGNC Symbol;Acc:9381]	ortholog_one2one				8	0	6	8	8	YES	YES	0	0	0	32.6	0	39.264	337	54	49	40	5.0806e-277	32	32.6	32.6	1535800000	528050000	488070000	519720000	85324000	29336000	27115000	28873000
792	ENSMMUP00000004605	ENSMMUP00000004605	ENSMMUT00000004888	ENSMMUG00000003457	ENSMMUP00000004605|ENSMMUT00000004888|ENSMMUG00000003457|PRKACB|protein kinase, cAMP-dependent, catalytic, beta [Source:HGNC Symbol;Acc:9381]	ENSP00000359719	ENSG00000142875	PRKACB	protein kinase, cAMP-dependent, catalytic, beta [Source:HGNC Symbol;Acc:9381]	ortholog_one2one				7	1	6	7	7	YES	YES	1	1	1	37.2	6.2	35.309	304	2	1	1	5.9612e-217	37.2	37.2	37.2	35030000	14952000	13432000	6646300	2335400	996770	895490	443090
793	ENSMMUP00000004613	ENSMMUP00000004613	ENSMMUT00000004898	ENSMMUG00000003464	ENSMMUP00000004613|ENSMMUT00000004898|ENSMMUG00000003464									12	12	6	7	8	YES	YES	6	7	8	4.7	4.7	460.08	4067	13	7	9	1.285e-47	2.1	2.6	2.9	54994000	17065000	14967000	22962000	248840	77219	67722	103900
794	ENSMMUP00000004615	ENSMMUP00000004615	ENSMMUT00000004900	ENSMMUG00000029536	ENSMMUP00000004615|ENSMMUT00000004900|ENSMMUG00000029536|XM_001092160.1									2	2	2	2	2	YES	YES	2	2	2	5.2	5.2	54.662	484	3	4	2	3.3236e-45	5.2	5.2	5.2	9661700	2970600	3421600	3269500	301930	92833	106920	102170
795	ENSMMUP00000004630	ENSMMUP00000004630	ENSMMUT00000004915	ENSMMUG00000003472	ENSMMUP00000004630|ENSMMUT00000004915|ENSMMUG00000003472|LBR|lamin B receptor [Source:HGNC Symbol;Acc:6518]	ENSP00000339883	ENSG00000143815	LBR	lamin B receptor [Source:HGNC Symbol;Acc:6518]	ortholog_one2one				5	5	5	5	4	YES	YES	5	5	4	11.5	11.5	70.669	615	24	20	17	9.9864e-155	11.5	11.5	10.6	766720000	189960000	342760000	234010000	27383000	6784300	12241000	8357300
797	ENSMMUP00000004636;ENSMMUP00000036636	ENSMMUP00000004636	ENSMMUT00000004921	ENSMMUG00000003476	ENSMMUP00000004636|ENSMMUT00000004921|ENSMMUG00000003476|EHD3|EH-domain containing 3 [Source:HGNC Symbol;Acc:3244];	ENSP00000327116	ENSG00000013016	EHD3	EH-domain containing 3 [Source:HGNC Symbol;Acc:3244]	ortholog_one2one				16	10	12	14	16	YES	YES	6	8	10	45.7	29.7	65.253	576	12	15	19	0	31.4	42.9	45.7	316480000	76913000	97822000	141740000	9308200	2262100	2877100	4168900
798	ENSMMUP00000041339;ENSMMUP00000004648	ENSMMUP00000041339	ENSMMUT00000048303	ENSMMUG00000003485	ENSMMUP00000041339|ENSMMUT00000048303|ENSMMUG00000003485|RNMT|RNA (guanine-7-) methyltransferase [Source:HGNC Symbol;Acc:10075];	ENSP00000372804	ENSG00000101654	RNMT	RNA (guanine-7-) methyltransferase [Source:HGNC Symbol;Acc:10075]	ortholog_one2one				5	5	5	3	3	YES	YES	5	3	3	14.3	14.3	57.536	503	9	6	8	4.8521e-21	14.3	12.1	12.1	141730000	58751000	37455000	45527000	4429200	1836000	1170500	1422700
801	ENSMMUP00000004673	ENSMMUP00000004673	ENSMMUT00000004962	ENSMMUG00000003508	ENSMMUP00000004673|ENSMMUT00000004962|ENSMMUG00000003508|ACTR10|actin-related protein 10 homolog (S. cerevisiae) [Source:HGNC Symbol;Acc:17372]	ENSP00000254286	ENSG00000131966	ACTR10	actin-related protein 10 homolog (S. cerevisiae) [Source:HGNC Symbol;Acc:17372]	ortholog_one2one				3	3	2	2	2	YES	YES	2	2	2	12.8	12.8	46.432	415	3	4	3	1.764e-36	7	10.6	7	31366000	4747900	15995000	10624000	1254600	189910	639780	424940
803	ENSMMUP00000004676	ENSMMUP00000004676	ENSMMUT00000004966	ENSMMUG00000003509	ENSMMUP00000004676|ENSMMUT00000004966|ENSMMUG00000003509|PSMA3|proteasome (prosome, macropain) subunit, alpha type, 3 [Source:HGNC Symbol;Acc:9532]	ENSP00000216455	ENSG00000100567	PSMA3	proteasome (prosome, macropain) subunit, alpha type, 3 [Source:HGNC Symbol;Acc:9532]	ortholog_one2one				3	3	3	3	3	YES	YES	3	3	3	16.9	16.9	28.433	255	16	12	12	2.0205e-27	16.9	16.9	16.9	298700000	133580000	86460000	78662000	19913000	8905400	5764000	5244100
805	ENSMMUP00000004689	ENSMMUP00000004689	ENSMMUT00000004979	ENSMMUG00000003520	ENSMMUP00000004689|ENSMMUT00000004979|ENSMMUG00000003520|UFSP2|UFM1-specific peptidase 2 [Source:HGNC Symbol;Acc:25640]	ENSP00000264689	ENSG00000109775	UFSP2	UFM1-specific peptidase 2 [Source:HGNC Symbol;Acc:25640]	ortholog_one2one				3	3	1	3	2	YES	YES	1	3	2	14.1	14.1	49.836	441	1	4	2	8.8485e-09	6.3	14.1	10.2	46037000	8475200	18001000	19560000	2092600	385240	818240	889100
806	ENSMMUP00000004693	ENSMMUP00000004693	ENSMMUT00000004983	ENSMMUG00000003523	ENSMMUP00000004693|ENSMMUT00000004983|ENSMMUG00000003523|RMND5A|required for meiotic nuclear division 5 homolog A (S. cerevisiae) [Source:HGNC Symbol;Acc:25850]	ENSP00000283632	ENSG00000153561	RMND5A	required for meiotic nuclear division 5 homolog A (S. cerevisiae) [Source:HGNC Symbol;Acc:25850]	ortholog_one2one				2	2	2	2	1	YES	YES	2	2	1	6.4	6.4	44.275	393	2	3	1	8.486e-09	6.4	6.4	3.1	8197300	4234000	3150300	813020	327890	169360	126010	32521
808	ENSMMUP00000004713	ENSMMUP00000004713	ENSMMUT00000005004	ENSMMUG00000003538	ENSMMUP00000004713|ENSMMUT00000005004|ENSMMUG00000003538|KIAA0196|KIAA0196 [Source:HGNC Symbol;Acc:28984]	ENSP00000318016	ENSG00000164961	KIAA0196	KIAA0196 [Source:HGNC Symbol;Acc:28984]	ortholog_one2one				12	12	6	11	9	YES	YES	6	11	9	13.4	13.4	134.31	1160	18	24	20	6.934e-60	7.4	12.5	10.7	247690000	61822000	104620000	81248000	3347100	835430	1413700	1097900
809	ENSMMUP00000004718	ENSMMUP00000004718	ENSMMUT00000005009	ENSMMUG00000003543	ENSMMUP00000004718|ENSMMUT00000005009|ENSMMUG00000003543|PRPSAP1|phosphoribosyl pyrophosphate synthetase-associated protein 1 [Source:HGNC Symbol;Acc:9466]	ENSP00000414624	ENSG00000161542	PRPSAP1	phosphoribosyl pyrophosphate synthetase-associated protein 1 [Source:HGNC Symbol;Acc:9466]	ortholog_one2one				5	5	5	5	3	YES	YES	5	5	3	20.8	20.8	39.222	356	16	14	8	9.5066e-38	20.8	20.8	12.4	261140000	113190000	85461000	62486000	10881000	4716400	3560900	2603600
810	ENSMMUP00000004719	ENSMMUP00000004719	ENSMMUT00000005010	ENSMMUG00000003544	ENSMMUP00000004719|ENSMMUT00000005010|ENSMMUG00000003544|LACTB|lactamase, beta [Source:HGNC Symbol;Acc:16468]	ENSP00000261893	ENSG00000103642	LACTB	lactamase, beta [Source:HGNC Symbol;Acc:16468]	ortholog_one2one				8	8	4	8	6	YES	YES	4	8	6	24.7	24.7	60.627	547	16	18	15	1.8931e-89	9.7	24.7	16.5	480310000	155620000	183510000	141170000	14555000	4715800	5561000	4277900
813	ENSMMUP00000041183;ENSMMUP00000004729;ENSMMUP00000008134	ENSMMUP00000041183	ENSMMUT00000021019	ENSMMUG00000014993	ENSMMUP00000041183|ENSMMUT00000021019|ENSMMUG00000014993;									9	9	7	8	8	YES	YES	7	8	8	35.8	35.8	39.779	374	35	33	38	1.7024e-278	29.4	31.8	33.4	4513000000	1648700000	1454400000	1409900000	196220000	71684000	63233000	61302000
815	ENSMMUP00000004739;ENSMMUP00000036091	ENSMMUP00000004739	ENSMMUT00000005030	ENSMMUG00000003558	ENSMMUP00000004739|ENSMMUT00000005030|ENSMMUG00000003558|CLYBL|citrate lyase beta like [Source:HGNC Symbol;Acc:18355];	ENSP00000365538	ENSG00000125246	CLYBL	citrate lyase beta like [Source:HGNC Symbol;Acc:18355]	ortholog_one2one				2	2	2	1	1	YES	YES	2	1	1	7.6	7.6	37.454	341	4	2	3	1.3113e-10	7.6	2.9	2.9	24114000	6413100	7139100	10561000	1004700	267210	297460	440060
816	ENSMMUP00000004740;ENSMMUP00000004741	ENSMMUP00000004740	ENSMMUT00000005031	ENSMMUG00000003560	ENSMMUP00000004740|ENSMMUT00000005031|ENSMMUG00000003560|UCHL3|ubiquitin carboxyl-terminal esterase L3 (ubiquitin thiolesterase) [Source:HGNC Symbol;Acc:12515];	ENSP00000366819	ENSG00000118939	UCHL3	ubiquitin carboxyl-terminal esterase L3 (ubiquitin thiolesterase) [Source:HGNC Symbol;Acc:12515]	apparent_ortholog_one2one				5	5	3	3	3	YES	YES	3	3	3	29.6	29.6	26.165	230	9	11	10	5.8244e-29	23.9	23.5	17.8	216400000	45784000	126260000	44353000	15457000	3270300	9018800	3168100
818	ENSMMUP00000004748;ENSMMUP00000004746	ENSMMUP00000004748	ENSMMUT00000005040	ENSMMUG00000003565	ENSMMUP00000004748|ENSMMUT00000005040|ENSMMUG00000003565|LGALS3|lectin, galactoside-binding, soluble, 3 [Source:HGNC Symbol;Acc:6563];	ENSP00000254301	ENSG00000131981	LGALS3	lectin, galactoside-binding, soluble, 3 [Source:HGNC Symbol;Acc:6563]	ortholog_one2one				3	3	3	3	3	YES	YES	3	3	3	15.2	15.2	26.98	256	44	25	30	5.7332e-95	15.2	15.2	15.2	8307700000	3978100000	1756500000	2573200000	830770000	397810000	175650000	257320000
819	ENSMMUP00000004753	ENSMMUP00000004753	ENSMMUT00000005045	ENSMMUG00000003570	ENSMMUP00000004753|ENSMMUT00000005045|ENSMMUG00000003570|ATP5A1|ATP synthase, H+ transporting, mitochondrial F1 complex, alpha subunit 1, cardiac muscle [Source:HGNC Symbol;Acc:823]	ENSP00000282050	ENSG00000152234	ATP5A1	ATP synthase, H+ transporting, mitochondrial F1 complex, alpha subunit 1, cardiac muscle [Source:HGNC Symbol;Acc:823]	ortholog_one2one				17	17	16	15	14	YES	YES	16	15	14	41	41	59.747	553	113	104	98	0	37.4	36.9	36.7	12429000000	3993800000	3828000000	4607300000	345250000	110940000	106330000	127980000
820	ENSMMUP00000004761	ENSMMUP00000004761	ENSMMUT00000005053	ENSMMUG00000003572	ENSMMUP00000004761|ENSMMUT00000005053|ENSMMUG00000003572									9	9	8	7	8	YES	YES	8	7	8	28.3	28.3	55.279	491	21	19	13	2.1077e-210	27.9	21.2	25.3	298730000	69089000	176470000	53173000	9957700	2303000	5882300	1772400
823	ENSMMUP00000004782	ENSMMUP00000004782	ENSMMUT00000005075	ENSMMUG00000003585	ENSMMUP00000004782|ENSMMUT00000005075|ENSMMUG00000003585|ALG5|asparagine-linked glycosylation 5, dolichyl-phosphate beta-glucosyltransferase homolog (S. cerevisiae) [Source:HGNC Symbol;Acc:20266]	ENSP00000239891	ENSG00000120697	ALG5	asparagine-linked glycosylation 5, dolichyl-phosphate beta-glucosyltransferase homolog (S. cerevisiae) [Source:HGNC Symbol;Acc:20266]	ortholog_one2one				6	6	5	5	5	YES	YES	5	5	5	17.9	17.9	36.916	324	25	29	29	2.9823e-65	12	14.5	12	149380000	40726000	64082000	44577000	7469200	2036300	3204100	2228800
825	ENSMMUP00000004789	ENSMMUP00000004789	ENSMMUT00000005082	ENSMMUG00000003591	ENSMMUP00000004789|ENSMMUT00000005082|ENSMMUG00000003591|PLEKHA2|pleckstrin homology domain containing, family A (phosphoinositide binding specific) member 2 [Source:HGNC Symbol;Acc:14336]	ENSP00000393860	ENSG00000169499	PLEKHA2	pleckstrin homology domain containing, family A (phosphoinositide binding specific) member 2 [Source:HGNC Symbol;Acc:14336]	ortholog_one2one				3	3	2	3	2	YES	YES	2	3	2	10.3	10.3	41.624	379	7	7	4	4.1194e-34	6.6	10.3	6.6	37958000	12885000	16569000	8503700	1459900	495580	637260	327060
826	ENSMMUP00000035797;ENSMMUP00000004790;ENSMMUP00000004791;ENSMMUP00000004794	ENSMMUP00000035797	ENSMMUT00000042785	ENSMMUG00000003589	ENSMMUP00000035797|ENSMMUT00000042785|ENSMMUG00000003589|ANK3|ankyrin 3, node of Ranvier (ankyrin G) [Source:HGNC Symbol;Acc:494];	ENSP00000280772	ENSG00000151150	ANK3	ankyrin 3, node of Ranvier (ankyrin G) [Source:HGNC Symbol;Acc:494]	ortholog_one2one				8	5	6	2	4	YES	YES	4	1	3	3.1	2.2	479.83	4373	5	1	4	3.9499e-32	2.5	0.8	1.9	31888000	19809000	1896200	10183000	118100	73366	7022.8	37714
827	ENSMMUP00000004793;ENSMMUP00000038756	ENSMMUP00000004793	ENSMMUT00000005086	ENSMMUG00000003594	ENSMMUP00000004793|ENSMMUT00000005086|ENSMMUG00000003594|USP13|ubiquitin specific peptidase 13 (isopeptidase T-3) [Source:HGNC Symbol;Acc:12611];	ENSP00000263966	ENSG00000058056	USP13	ubiquitin specific peptidase 13 (isopeptidase T-3) [Source:HGNC Symbol;Acc:12611]	ortholog_one2one				8	6	6	7	7	YES	YES	4	5	5	14.8	13.6	97.291	863	8	8	10	9.1208e-89	8.6	11.7	12.7	73159000	16250000	32108000	24801000	1701400	377900	746710	576760
828	ENSMMUP00000004809	ENSMMUP00000004809	ENSMMUT00000005104	ENSMMUG00000003604	ENSMMUP00000004809|ENSMMUT00000005104|ENSMMUG00000003604|GNB2L1|guanine nucleotide binding protein (G protein), beta polypeptide 2-like 1 [Source:HGNC Symbol;Acc:4399]	ENSP00000426909	ENSG00000204628	GNB2L1	guanine nucleotide binding protein (G protein), beta polypeptide 2-like 1 [Source:HGNC Symbol;Acc:4399]	apparent_ortholog_one2one				10	10	10	10	10	YES	YES	10	10	10	55.6	55.6	33.392	302	64	48	51	0	55.6	55.6	55.6	5831800000	2819000000	1517500000	1495400000	277710000	134240000	72260000	71209000
830	ENSMMUP00000004830;ENSMMUP00000004829	ENSMMUP00000004830	ENSMMUT00000005126	ENSMMUG00000003618	ENSMMUP00000004830|ENSMMUT00000005126|ENSMMUG00000003618|CHID1|chitinase domain containing 1 [Source:HGNC Symbol;Acc:28474];	ENSP00000398722	ENSG00000177830	CHID1	chitinase domain containing 1 [Source:HGNC Symbol;Acc:28474]	ortholog_one2one				10	10	10	8	7	YES	YES	10	8	7	39.2	39.2	44.931	393	22	24	21	1.526e-209	39.2	26.7	25.2	568190000	229420000	209140000	129630000	25827000	10428000	9506500	5892100
831	ENSMMUP00000004831	ENSMMUP00000004831	ENSMMUT00000005127	ENSMMUG00000003620	ENSMMUP00000004831|ENSMMUT00000005127|ENSMMUG00000003620|AP2A2|adaptor-related protein complex 2, alpha 2 subunit [Source:HGNC Symbol;Acc:562]	ENSP00000413234	ENSG00000183020	AP2A2	adaptor-related protein complex 2, alpha 2 subunit [Source:HGNC Symbol;Acc:562]	ortholog_one2one				18	13	17	16	17	YES	YES	12	11	12	30.6	23.1	103.97	940	68	64	66	0	29.5	28.3	29.1	2382700000	772520000	840190000	769960000	40384000	13093000	14241000	13050000
832	ENSMMUP00000004834	ENSMMUP00000004834	ENSMMUT00000005130	ENSMMUG00000003621	ENSMMUP00000004834|ENSMMUT00000005130|ENSMMUG00000003621|AKT2|v-akt murine thymoma viral oncogene homolog 2 [Source:HGNC Symbol;Acc:392]	ENSP00000375892	ENSG00000105221	AKT2	v-akt murine thymoma viral oncogene homolog 2 [Source:HGNC Symbol;Acc:392]	ortholog_one2one				3	3	2	3	2	YES	YES	2	3	2	7.9	7.9	55.708	481	8	8	6	4.4555e-14	5	7.9	5	38242000	8299800	26787000	3155000	1062300	230550	744090	87640
833	ENSMMUP00000004838;ENSMMUP00000004835;ENSMMUP00000004840	ENSMMUP00000004838	ENSMMUT00000005134	ENSMMUG00000003619	ENSMMUP00000004838|ENSMMUT00000005134|ENSMMUG00000003619|HNRNPA2B1|heterogeneous nuclear ribonucleoprotein A2/B1 [Source:HGNC Symbol;Acc:5033];	ENSP00000346694	ENSG00000122566	HNRNPA2B1	heterogeneous nuclear ribonucleoprotein A2/B1 [Source:HGNC Symbol;Acc:5033]	ortholog_one2one				19	18	17	16	15	YES	YES	17	16	14	46	46	37.297	352	248	215	192	0	45.5	43.8	43.2	20320000000	7040300000	7542900000	5736700000	1016000000	352020000	377150000	286840000
835	ENSMMUP00000004848;ENSMMUP00000037127;ENSMMUP00000004852	ENSMMUP00000004848	ENSMMUT00000005146	ENSMMUG00000003631	ENSMMUP00000004848|ENSMMUT00000005146|ENSMMUG00000003631|CKAP5|cytoskeleton associated protein 5 [Source:HGNC Symbol;Acc:28959]	ENSP00000432768	ENSG00000175216	CKAP5	cytoskeleton associated protein 5 [Source:HGNC Symbol;Acc:28959]	ortholog_one2one				10	10	8	9	7	YES	YES	8	9	7	8.3	8.3	202.35	1826	14	17	12	1.5863e-38	6.6	7.2	5.7	112870000	38666000	36150000	38051000	998820	342180	319910	336730
836	ENSMMUP00000004853;ENSMMUP00000011565	ENSMMUP00000004853	ENSMMUT00000005151	ENSMMUG00000003636	ENSMMUP00000004853|ENSMMUT00000005151|ENSMMUG00000003636|BTF3L4|basic transcription factor 3-like 4 [Source:HGNC Symbol;Acc:30547];									6	6	5	5	6	YES	YES	5	5	6	66.4	66.4	16.451	152	11	8	13	1.6509e-68	66.4	65.8	66.4	736450000	181370000	281960000	273120000	73645000	18137000	28196000	27312000
837	ENSMMUP00000035397;ENSMMUP00000004854	ENSMMUP00000035397	ENSMMUT00000003633	ENSMMUG00000003637	ENSMMUP00000035397|ENSMMUT00000003633|ENSMMUG00000003637|ZP3|zona pellucida glycoprotein 3 (sperm receptor) [Source:HGNC Symbol;Acc:13189];									7	7	7	7	4	YES	YES	7	7	4	25.7	25.7	49.793	456	51	33	40	8.8001e-246	25.7	25.7	17.5	2958200000	1206100000	933550000	818560000	118330000	48244000	37342000	32742000
838	ENSMMUP00000004855	ENSMMUP00000004855	ENSMMUT00000005153	ENSMMUG00000003638	ENSMMUP00000004855|ENSMMUT00000005153|ENSMMUG00000003638	ENSP00000261921	ENSG00000129038	LOXL1	lysyl oxidase-like 1 [Source:HGNC Symbol;Acc:6665]	ortholog_one2one				2	2	1	1	2	YES	YES	1	1	2	4.7	4.7	63.322	576	3	2	4	1.688e-08	2.3	2.3	4.7	29177000	7638700	9350800	12188000	884160	231480	283360	369330
839	ENSMMUP00000004862	ENSMMUP00000004862	ENSMMUT00000005161	ENSMMUG00000003644	ENSMMUP00000004862|ENSMMUT00000005161|ENSMMUG00000003644|RRP9|ribosomal RNA processing 9, small subunit (SSU) processome component, homolog (yeast) [Source:HGNC Symbol;Acc:16829]	ENSP00000232888	ENSG00000114767	RRP9	ribosomal RNA processing 9, small subunit (SSU) processome component, homolog (yeast) [Source:HGNC Symbol;Acc:16829]	ortholog_one2one				2	2	1	2	2	YES	YES	1	2	2	9.5	9.5	51.513	472	1	2	3	8.2351e-47	3.6	9.5	9.5	26378000	9996300	6300700	10081000	942070	357010	225030	360040
840	ENSMMUP00000004864	ENSMMUP00000004864	ENSMMUT00000005163	ENSMMUG00000003646	ENSMMUP00000004864|ENSMMUT00000005163|ENSMMUG00000003646	ENSP00000420487	ENSG00000114786	ABHD14A-ACY1	ABHD14A-ACY1 readthrough (non-protein coding) [Source:HGNC Symbol;Acc:38856]	ortholog_one2one				7	7	7	6	6	YES	YES	7	6	6	48.3	48.3	30.157	271	13	11	11	4.1125e-112	48.3	36.9	43.2	299890000	83058000	143670000	73163000	15784000	4371500	7561500	3850700
842	ENSMMUP00000004871	ENSMMUP00000004871	ENSMMUT00000005171	ENSMMUG00000003655	ENSMMUP00000004871|ENSMMUT00000005171|ENSMMUG00000003655|CRYGD|crystallin, gamma D [Source:HGNC Symbol;Acc:2411]	ENSP00000264376	ENSG00000118231	CRYGD	crystallin, gamma D [Source:HGNC Symbol;Acc:2411]	ortholog_one2one				2	2	2	2	2	YES	YES	2	2	2	10.3	10.3	20.726	174	4	3	5	1.7798e-23	10.3	10.3	10.3	52311000	25319000	8219500	18773000	5812400	2813200	913280	2085900
843	ENSMMUP00000004874;ENSMMUP00000004872	ENSMMUP00000004874	ENSMMUT00000005174	ENSMMUG00000003654	ENSMMUP00000004874|ENSMMUT00000005174|ENSMMUG00000003654|UBE2I|ubiquitin-conjugating enzyme E2I (UBC9 homolog, yeast) [Source:HGNC Symbol;Acc:12485];	ENSP00000348056	ENSG00000103275	UBE2I	ubiquitin-conjugating enzyme E2I [Source:HGNC Symbol;Acc:12485]	ortholog_one2one				3	3	1	2	1	YES	YES	1	2	1	19.1	19.1	20.275	183	3	3	1	1.1502e-06	7.1	12	5.5	11294000	1158200	8161100	1974200	1254800	128690	906790	219360
844	ENSMMUP00000004875	ENSMMUP00000004875	ENSMMUT00000005176	ENSMMUG00000003657	ENSMMUP00000004875|ENSMMUT00000005176|ENSMMUG00000003657|ATPAF2|ATP synthase mitochondrial F1 complex assembly factor 2 [Source:HGNC Symbol;Acc:18802]	ENSP00000417190	ENSG00000171953	ATPAF2	ATP synthase mitochondrial F1 complex assembly factor 2 [Source:HGNC Symbol;Acc:18802]	ortholog_one2one				4	4	3	4	3	YES	YES	3	4	3	14.2	14.2	32.755	289	8	7	7	3.931e-24	10	14.2	10	144330000	46697000	56946000	40687000	10309000	3335500	4067500	2906200
845	ENSMMUP00000004886	ENSMMUP00000004886	ENSMMUT00000005187	ENSMMUG00000003665	ENSMMUP00000004886|ENSMMUT00000005187|ENSMMUG00000003665|PLBD1|phospholipase B domain containing 1 [Source:HGNC Symbol;Acc:26215]	ENSP00000240617	ENSG00000121316	PLBD1	phospholipase B domain containing 1 [Source:HGNC Symbol;Acc:26215]	ortholog_one2one				11	11	9	7	9	YES	YES	9	7	9	23.7	23.7	63.318	553	24	19	24	1.2104e-88	23.7	16.5	23.5	457290000	189410000	150280000	117590000	19054000	7892000	6261900	4899700
846	ENSMMUP00000004889;ENSMMUP00000004891	ENSMMUP00000004889	ENSMMUT00000005191	ENSMMUG00000003669	ENSMMUP00000004889|ENSMMUT00000005191|ENSMMUG00000003669|LOC717617;	ENSP00000347324	ENSG00000174099	MSRB3	methionine sulfoxide reductase B3 [Source:HGNC Symbol;Acc:27375]	ortholog_one2one				3	3	2	3	2	YES	YES	2	3	2	29.7	29.7	19.983	185	4	5	4	4.2481e-14	22.7	29.7	22.7	42747000	8120600	23612000	11015000	4749700	902280	2623500	1223800
847	ENSMMUP00000004896;ENSMMUP00000004895;ENSMMUP00000004890;ENSMMUP00000004892	ENSMMUP00000004896	ENSMMUT00000005198	ENSMMUG00000003668	ENSMMUP00000004896|ENSMMUT00000005198|ENSMMUG00000003668|GAPVD1|GTPase activating protein and VPS9 domains 1 [Source:HGNC Symbol;Acc:23375];	ENSP00000377665	ENSG00000165219	GAPVD1	GTPase activating protein and VPS9 domains 1 [Source:HGNC Symbol;Acc:23375]	ortholog_one2one				5	5	3	2	2	YES	YES	3	2	2	5.1	5.1	158.73	1424	9	5	6	8.5719e-09	3.1	2.7	2.5	80366000	33659000	32512000	14196000	1181900	494980	478110	208770
848	ENSMMUP00000004907	ENSMMUP00000004907	ENSMMUT00000005210	ENSMMUG00000003682	ENSMMUP00000004907|ENSMMUT00000005210|ENSMMUG00000003682|TMEM179B|transmembrane protein 179B [Source:HGNC Symbol;Acc:33744]	ENSP00000333697	ENSG00000185475	TMEM179B	transmembrane protein 179B [Source:HGNC Symbol;Acc:33744]	ortholog_one2one				2	2	2	1	1	YES	YES	2	1	1	11	11	23.656	219	5	3	3	5.9005e-08	11	7.3	7.3	25863000	8797000	9487800	7577900	3232800	1099600	1186000	947230
849	ENSMMUP00000004937;ENSMMUP00000004934	ENSMMUP00000004937	ENSMMUT00000005241	ENSMMUG00000003700	ENSMMUP00000004937|ENSMMUT00000005241|ENSMMUG00000003700|KNG1|kininogen 1 [Source:HGNC Symbol;Acc:6383];	ENSP00000265023	ENSG00000113889	KNG1	kininogen 1 [Source:HGNC Symbol;Acc:6383]	ortholog_one2one				9	9	8	6	7	YES	YES	8	6	7	14.8	14.8	72.05	644	19	18	20	2.7376e-177	14.8	12	12	484660000	192060000	171440000	121160000	13099000	5190700	4633500	3274700
850	ENSMMUP00000004942;ENSMMUP00000038285;ENSMMUP00000004941;ENSMMUP00000026101	ENSMMUP00000004942	ENSMMUT00000005246	ENSMMUG00000003702	ENSMMUP00000004942|ENSMMUT00000005246|ENSMMUG00000003702|XM_001102871.1;									11	6	11	11	11	YES	YES	6	6	6	45.7	28.5	46.402	407	38	41	34	0	45.7	45.7	45.7	2702300000	977900000	976800000	747600000	112600000	40746000	40700000	31150000
851	ENSMMUP00000004943	ENSMMUP00000004943	ENSMMUT00000005247	ENSMMUG00000003704	ENSMMUP00000004943|ENSMMUT00000005247|ENSMMUG00000003704|RFC4|replication factor C (activator 1) 4, 37kDa [Source:HGNC Symbol;Acc:9972]	ENSP00000376272	ENSG00000163918	RFC4	replication factor C (activator 1) 4, 37kDa [Source:HGNC Symbol;Acc:9972]	ortholog_one2one				3	3	3	3	1	YES	YES	3	3	1	13.2	13.2	39.737	363	5	5	3	4.259e-10	13.2	13.2	2.5	49536000	15695000	28478000	5364200	1905200	603640	1095300	206310
852	ENSMMUP00000004952;ENSMMUP00000004951	ENSMMUP00000004952	ENSMMUT00000005256	ENSMMUG00000003710	ENSMMUP00000004952|ENSMMUT00000005256|ENSMMUG00000003710|BCLAF1|BCL2-associated transcription factor 1 [Source:HGNC Symbol;Acc:16863];	ENSP00000435210	ENSG00000029363	BCLAF1	BCL2-associated transcription factor 1 [Source:HGNC Symbol;Acc:16863]	ortholog_one2one				10	4	6	6	8	YES	YES	2	2	3	12	3.2	100.23	869	29	20	26	7.9038e-101	12	12	11.3	1333400000	683400000	308780000	341260000	27780000	14237000	6433000	7109500
854	ENSMMUP00000004959	ENSMMUP00000004959	ENSMMUT00000005264	ENSMMUG00000028907	ENSMMUP00000004959|ENSMMUT00000005264|ENSMMUG00000028907|INSR_MACMU|Insulin receptor Fragment (IR)(EC 2.7.10.1)(CD220 antigen) [Contains Insulin receptor subunit alpha;Insulin receptor subunit beta] [Source:UniProtKB/Swiss-Prot;Acc:Q28516]									2	2	2	1	2	YES	YES	2	1	2	3.2	3.2	89.21	786	4	1	3	3.9086e-06	3.2	1.3	3.2	7765400	4427200	1753300	1584900	176490	100620	39847	36021
856	ENSMMUP00000008838;ENSMMUP00000004970	ENSMMUP00000008838	ENSMMUT00000009405	ENSMMUG00000031948	ENSMMUP00000008838|ENSMMUT00000009405|ENSMMUG00000031948;									8	1	7	7	8	YES	YES	1	1	1	22.9	2.8	28.139	253	5	1	2	7.2506e-157	19.4	19.4	22.9	39613000	34033000	1658300	3920900	2475800	2127100	103650	245060
857	ENSMMUP00000004971;ENSMMUP00000004972;ENSMMUP00000039609;ENSMMUP00000004973	ENSMMUP00000004971	ENSMMUT00000005277	ENSMMUG00000003730	ENSMMUP00000004971|ENSMMUT00000005277|ENSMMUG00000003730|DPH5|DPH5 homolog (S. cerevisiae) [Source:HGNC Symbol;Acc:24270];	ENSP00000359127	ENSG00000117543	DPH5	DPH5 homolog (S. cerevisiae) [Source:HGNC Symbol;Acc:24270]	ortholog_one2one				2	2	2	1	1	YES	YES	2	1	1	11.2	11.2	31.661	285	3	4	1	8.7171e-119	11.2	6.7	4.6	15718000	3478300	10687000	1553100	924590	204600	628630	91356
858	ENSMMUP00000033338;ENSMMUP00000008874;ENSMMUP00000033339;ENSMMUP00000004985;ENSMMUP00000014101;ENSMMUP00000007295;ENSMMUP00000039551	ENSMMUP00000033338	ENSMMUT00000032593	ENSMMUG00000029534	ENSMMUP00000033338|ENSMMUT00000032593|ENSMMUG00000029534|LOC718267;						ENSMUSP00000025815	ENSMUSG00000024878	ortholog_one2one	2	2	2	2	1	YES	YES	2	2	1	20.1	20.1	15.514	134	3	3	2	5.0197e-09	20.1	20.1	11.2	94053000	47309000	26488000	20256000	13436000	6758400	3784000	2893800
859	ENSMMUP00000034946;ENSMMUP00000004986	ENSMMUP00000034946	ENSMMUT00000041936	ENSMMUG00000003736	ENSMMUP00000034946|ENSMMUT00000041936|ENSMMUG00000003736|Q8SPT6_MACMU|Nuclear factor of kappa light polypeptide gene enhancer in B-cells 1 Fragment [Source:UniProtKB/TrEMBL;Acc:Q8SPT6];	ENSP00000226574	ENSG00000109320	NFKB1	nuclear factor of kappa light polypeptide gene enhancer in B-cells 1 [Source:HGNC Symbol;Acc:7794]	ortholog_one2one				9	9	7	7	7	YES	YES	7	7	7	16.6	16.6	105.61	969	12	13	11	6.2106e-134	12.9	12.5	13.7	357010000	83645000	155100000	118270000	6491200	1520800	2820000	2150300
860	ENSMMUP00000004987	ENSMMUP00000004987	ENSMMUT00000005293	ENSMMUG00000003739	ENSMMUP00000004987|ENSMMUT00000005293|ENSMMUG00000003739|MANBA|mannosidase, beta A, lysosomal [Source:HGNC Symbol;Acc:6831]	ENSP00000226578	ENSG00000109323	MANBA	mannosidase, beta A, lysosomal [Source:HGNC Symbol;Acc:6831]	ortholog_one2one				4	4	2	3	2	YES	YES	2	3	2	6.9	6.9	94.779	821	2	4	2	3.1191e-14	3.5	5.5	3.7	19780000	5101100	8862500	5816500	460000	118630	206100	135270
862	ENSMMUP00000004992;ENSMMUP00000004991	ENSMMUP00000004992	ENSMMUT00000005299	ENSMMUG00000003744	ENSMMUP00000004992|ENSMMUT00000005299|ENSMMUG00000003744|SLC44A2|solute carrier family 44, member 2 [Source:HGNC Symbol;Acc:17292];	ENSP00000336888	ENSG00000129353	SLC44A2	solute carrier family 44, member 2 [Source:HGNC Symbol;Acc:17292]	ortholog_one2one				3	3	2	3	3	YES	YES	2	3	3	7.8	7.8	49.704	437	11	15	12	1.5128e-50	5.5	7.8	7.8	180270000	67826000	59420000	53025000	8194200	3083000	2700900	2410200
863	ENSMMUP00000004994;ENSMMUP00000004993	ENSMMUP00000004994	ENSMMUT00000005302	ENSMMUG00000003745	ENSMMUP00000004994|ENSMMUT00000005302|ENSMMUG00000003745|THOC2|THO complex 2 [Source:HGNC Symbol;Acc:19073];	ENSP00000245838	ENSG00000125676	THOC2	THO complex 2 [Source:HGNC Symbol;Acc:19073]	ortholog_one2one				8	8	7	7	6	YES	YES	7	7	6	7.1	7.1	173.75	1515	17	18	11	1.7496e-39	6.2	7.1	5.3	86182000	24127000	39424000	22631000	1064000	297860	486720	279400
865	ENSMMUP00000005000;ENSMMUP00000035685;ENSMMUP00000035683;ENSMMUP00000035684;ENSMMUP00000035682	ENSMMUP00000005000	ENSMMUT00000005308	ENSMMUG00000003749	ENSMMUP00000005000|ENSMMUT00000005308|ENSMMUG00000003749|NT5C2|5-nucleotidase, cytosolic II [Source:HGNC Symbol;Acc:8022];	ENSP00000339479	ENSG00000076685	NT5C2	5'-nucleotidase, cytosolic II [Source:HGNC Symbol;Acc:8022]	ortholog_one2one				10	10	9	9	9	YES	YES	9	9	9	28.9	28.9	64.969	561	28	20	22	5.4156e-131	26.6	25.7	26.6	308840000	84263000	92892000	131680000	9083400	2478300	2732100	3873000
866	ENSMMUP00000005008	ENSMMUP00000005008	ENSMMUT00000005318	ENSMMUG00000003755	ENSMMUP00000005008|ENSMMUT00000005318|ENSMMUG00000003755|Q5EE52_MACMU|Integrin alpha 5 Fragment [Source:UniProtKB/TrEMBL;Acc:Q5EE52]	ENSP00000293379	ENSG00000161638	ITGA5	integrin, alpha 5 (fibronectin receptor, alpha polypeptide) [Source:HGNC Symbol;Acc:6141]	ortholog_one2one				9	9	7	5	8	YES	YES	7	5	8	15	15	114.76	1048	16	14	12	4.0513e-122	11.6	8.9	13.9	531120000	208680000	188420000	134010000	12954000	5089700	4595700	3268600
870	ENSMMUP00000005018;ENSMMUP00000037797	ENSMMUP00000005018	ENSMMUT00000005330	ENSMMUG00000003768	ENSMMUP00000005018|ENSMMUT00000005330|ENSMMUG00000003768|SOAT1|sterol O-acyltransferase 1 [Source:HGNC Symbol;Acc:11177];	ENSP00000356591	ENSG00000057252	SOAT1	sterol O-acyltransferase 1 [Source:HGNC Symbol;Acc:11177]	ortholog_one2one				6	6	6	6	5	YES	YES	6	6	5	11.2	11.2	64.899	552	9	11	11	3.0164e-114	11.2	11.2	9.2	170030000	60649000	56050000	53328000	6801100	2426000	2242000	2133100
871	ENSMMUP00000005021;ENSMMUP00000005022;ENSMMUP00000024214;ENSMMUP00000003461;ENSMMUP00000015339;ENSMMUP00000021169;ENSMMUP00000034218;ENSMMUP00000019214	ENSMMUP00000005021	ENSMMUT00000005333	ENSMMUG00000003765	ENSMMUP00000005021|ENSMMUT00000005333|ENSMMUG00000003765|Q5TM34_MACMU|Major histocompatibility complex, class I, B [Source:UniProtKB/TrEMBL;Acc:Q5TM34];									6	0	6	5	4	YES	YES	0	0	0	23.1	0	41.099	363	13	10	6	6.2434e-143	23.1	18.7	12.7	353850000	126350000	121270000	106230000	17692000	6317600	6063400	5311400
873	ENSMMUP00000005033;ENSMMUP00000005031;ENSMMUP00000005034;ENSMMUP00000005032	ENSMMUP00000005033	ENSMMUT00000005345	ENSMMUG00000003775	ENSMMUP00000005033|ENSMMUT00000005345|ENSMMUG00000003775|XM_001118081.1;									5	5	4	4	2	YES	YES	4	4	2	33.2	33.2	34.22	313	15	15	11	1.3692e-27	24.6	24.9	15	1726400000	696730000	487730000	541930000	156950000	63339000	44340000	49266000
874	ENSMMUP00000005038;ENSMMUP00000005037	ENSMMUP00000005038	ENSMMUT00000005350	ENSMMUG00000003776	ENSMMUP00000005038|ENSMMUT00000005350|ENSMMUG00000003776|UBA6|ubiquitin-like modifier activating enzyme 6 [Source:HGNC Symbol;Acc:25581]	ENSP00000313454	ENSG00000033178	UBA6	ubiquitin-like modifier activating enzyme 6 [Source:HGNC Symbol;Acc:25581]	ortholog_one2one				12	12	9	9	10	YES	YES	9	9	10	16.7	16.7	117.98	1051	26	25	24	0	12.8	10.8	15.3	465870000	127790000	192100000	145970000	7394700	2028400	3049300	2317000
875	ENSMMUP00000009026;ENSMMUP00000005040	ENSMMUP00000009026	ENSMMUT00000009605	ENSMMUG00000003780	ENSMMUP00000009026|ENSMMUT00000009605|ENSMMUG00000003780|LOC723667;	ENSP00000438262	ENSG00000119139	TJP2	tight junction protein 2 [Source:HGNC Symbol;Acc:11828]	ortholog_one2one				3	3	3	2	2	YES	YES	3	2	2	3.9	3.9	130.83	1164	6	5	5	5.7829e-33	3.9	2.9	2.9	111390000	29047000	29938000	52401000	1485100	387300	399170	698680
876	ENSMMUP00000005043	ENSMMUP00000005043	ENSMMUT00000005355	ENSMMUG00000003783	ENSMMUP00000005043|ENSMMUT00000005355|ENSMMUG00000003783|PTPN9|protein tyrosine phosphatase, non-receptor type 9 [Source:HGNC Symbol;Acc:9661]	ENSP00000303554	ENSG00000169410	PTPN9	protein tyrosine phosphatase, non-receptor type 9 [Source:HGNC Symbol;Acc:9661]	ortholog_one2one				4	4	3	1	2	YES	YES	3	1	2	10	10	66.557	580	4	1	3	4.6004e-13	8.1	1.9	3.8	19669000	16396000	1481000	1792800	561980	468440	42314	51222
877	ENSMMUP00000005044;ENSMMUP00000029510	ENSMMUP00000005044	ENSMMUT00000005356	ENSMMUG00000003785	ENSMMUP00000005044|ENSMMUT00000005356|ENSMMUG00000003785|TPRG1L|tumor protein p63 regulated 1-like [Source:HGNC Symbol;Acc:27007];	ENSP00000367595	ENSG00000158109	TPRG1L	tumor protein p63 regulated 1-like [Source:HGNC Symbol;Acc:27007]	ortholog_one2one				7	7	6	6	4	YES	YES	6	6	4	39	39	30.255	272	11	11	10	2.5944e-46	32	33.8	26.1	193960000	77181000	90665000	26117000	11410000	4540000	5333200	1536300
878	ENSMMUP00000005046;ENSMMUP00000005048	ENSMMUP00000005046	ENSMMUT00000005358	ENSMMUG00000003787	ENSMMUP00000005046|ENSMMUT00000005358|ENSMMUG00000003787|EXOC3|exocyst complex component 3 [Source:HGNC Symbol;Acc:30378];	ENSP00000425587	ENSG00000180104	EXOC3	exocyst complex component 3 [Source:HGNC Symbol;Acc:30378]	ortholog_one2one				6	6	4	3	5	YES	YES	4	3	5	9.7	9.7	85.558	745	7	6	8	4.5627e-16	7.5	5.8	7.9	116670000	54620000	35406000	26647000	2845700	1332200	863550	649920
880	ENSMMUP00000005049	ENSMMUP00000005049	ENSMMUT00000005361	ENSMMUG00000003788	ENSMMUP00000005049|ENSMMUT00000005361|ENSMMUG00000003788|TXNDC17|thioredoxin domain containing 17 [Source:HGNC Symbol;Acc:28218]	ENSP00000250101	ENSG00000129235	TXNDC17	thioredoxin domain containing 17 [Source:HGNC Symbol;Acc:28218]	ortholog_one2one				3	3	3	3	3	YES	YES	3	3	3	35.8	35.8	13.942	123	21	14	17	6.2851e-49	35.8	35.8	35.8	608540000	276140000	172260000	160150000	67615000	30682000	19139000	17794000
881	ENSMMUP00000005051	ENSMMUP00000005051	ENSMMUT00000005363	ENSMMUG00000003790	ENSMMUP00000005051|ENSMMUT00000005363|ENSMMUG00000003790|MED31|mediator complex subunit 31 [Source:HGNC Symbol;Acc:24260]	ENSP00000225728	ENSG00000108590	MED31	mediator complex subunit 31 [Source:HGNC Symbol;Acc:24260]	ortholog_one2one				3	3	3	2	2	YES	YES	3	2	2	33.6	33.6	15.805	131	5	4	4	6.1595e-17	33.6	24.4	24.4	13407000	4414000	2865000	6127500	1489600	490450	318330	680840
882	ENSMMUP00000005054	ENSMMUP00000005054	ENSMMUT00000005366	ENSMMUG00000003793	ENSMMUP00000005054|ENSMMUT00000005366|ENSMMUG00000003793|TOR1B|torsin family 1, member B (torsin B) [Source:HGNC Symbol;Acc:11995]	ENSP00000259339	ENSG00000136816	TOR1B	torsin family 1, member B (torsin B) [Source:HGNC Symbol;Acc:11995]	ortholog_one2one				3	2	2	1	2	YES	YES	2	1	1	12.5	9.5	37.897	336	3	1	5	1.1932e-10	9.5	4.2	8.3	8201800	3437300	1650500	3114000	390560	163680	78596	148290
883	ENSMMUP00000005056	ENSMMUP00000005056	ENSMMUT00000005368	ENSMMUG00000003794	ENSMMUP00000005056|ENSMMUT00000005368|ENSMMUG00000003794|TOR1A|torsin family 1, member A (torsin A) [Source:HGNC Symbol;Acc:3098]	ENSP00000345719	ENSG00000136827	TOR1A	torsin family 1, member A (torsin A) [Source:HGNC Symbol;Acc:3098]	ortholog_one2one				2	1	1	1	2	YES	YES	1	1	1	7.2	3.6	31.882	278	2	2	2	1.3402e-15	3.6	3.6	7.2	36005000	12254000	9531400	14220000	2000300	680800	529520	789980
884	ENSMMUP00000039997;ENSMMUP00000005063	ENSMMUP00000039997	ENSMMUT00000046966	ENSMMUG00000003799	ENSMMUP00000039997|ENSMMUT00000046966|ENSMMUG00000003799|FNBP1|formin binding protein 1 [Source:HGNC Symbol;Acc:17069];	ENSP00000413625	ENSG00000187239	FNBP1	formin binding protein 1 [Source:HGNC Symbol;Acc:17069]	ortholog_one2one				5	5	4	4	4	YES	YES	4	4	4	12.2	12.2	57.51	501	11	8	10	1.3434e-21	11	8.2	8.2	90498000	35656000	30062000	24780000	2828100	1114300	939440	774370
886	ENSMMUP00000005073	ENSMMUP00000005073	ENSMMUT00000005386	ENSMMUG00000003802	ENSMMUP00000005073|ENSMMUT00000005386|ENSMMUG00000003802|INPP5A|inositol polyphosphate-5-phosphatase, 40kDa [Source:HGNC Symbol;Acc:6076]	ENSP00000357583	ENSG00000068383	INPP5A	inositol polyphosphate-5-phosphatase, 40kDa [Source:HGNC Symbol;Acc:6076]	apparent_ortholog_one2one				3	3	3	3	3	YES	YES	3	3	3	16.3	16.3	21.227	184	5	6	4	7.7975e-44	16.3	16.3	16.3	64198000	22743000	25417000	16038000	4585600	1624500	1815500	1145600
888	ENSMMUP00000005086;ENSMMUP00000005087	ENSMMUP00000005086	ENSMMUT00000005402	ENSMMUG00000003820	ENSMMUP00000005086|ENSMMUT00000005402|ENSMMUG00000003820|DHX30|DEAH (Asp-Glu-Ala-His) box polypeptide 30 [Source:HGNC Symbol;Acc:16716];	ENSP00000405620	ENSG00000132153	DHX30	DEAH (Asp-Glu-Ala-His) box polypeptide 30 [Source:HGNC Symbol;Acc:16716]	ortholog_one2one				5	5	3	3	3	YES	YES	3	3	3	7.3	7.3	133.96	1194	5	4	3	3.6989e-24	4.4	3.8	4.4	27159000	12602000	6166600	8390400	323320	150030	73412	99886
889	ENSMMUP00000005091;ENSMMUP00000005094;ENSMMUP00000005092;ENSMMUP00000005093	ENSMMUP00000005091	ENSMMUT00000005407	ENSMMUG00000003823	ENSMMUP00000005091|ENSMMUT00000005407|ENSMMUG00000003823|MAP4|microtubule-associated protein 4 [Source:HGNC Symbol;Acc:6862];	ENSP00000353375	ENSG00000047849	MAP4	microtubule-associated protein 4 [Source:HGNC Symbol;Acc:6862]	ortholog_one2one				12	12	9	9	11	YES	YES	9	9	11	21.8	21.8	102.89	986	24	21	25	2.1171e-127	17.5	17.2	20.4	1134200000	250390000	492420000	391400000	17185000	3793700	7460900	5930200
890	ENSMMUP00000005095	ENSMMUP00000005095	ENSMMUT00000005411	ENSMMUG00000031737	ENSMMUP00000005095|ENSMMUT00000005411|ENSMMUG00000031737									2	2	2	2	2	YES	YES	2	2	2	34.3	34.3	10.426	99	3	4	3	9.5799e-59	34.3	34.3	34.3	60749000	15134000	29398000	16217000	10125000	2522300	4899600	2702900
891	ENSMMUP00000005100;ENSMMUP00000005101;ENSMMUP00000035129;ENSMMUP00000005105;ENSMMUP00000005102;ENSMMUP00000005104;ENSMMUP00000035130;ENSMMUP00000035149	ENSMMUP00000005100	ENSMMUT00000005416	ENSMMUG00000003827	ENSMMUP00000005100|ENSMMUT00000005416|ENSMMUG00000003827|ALBU_MACMU|Serum albumin Precursor; Fragment [Source:UniProtKB/Swiss-Prot;Acc:Q28522];	ENSP00000295897	ENSG00000163631	ALB	albumin [Source:HGNC Symbol;Acc:399]	ortholog_one2one				53	46	46	45	36	YES	YES	40	42	32	69.6	66	68.874	608	1612	1502	1259	0	67.4	66.1	56.6	309080000000	121130000000	112600000000	75342000000	7359000000	2884200000	2681000000	1793900000
892	ENSMMUP00000005107	ENSMMUP00000005107	ENSMMUT00000005423	ENSMMUG00000003831	ENSMMUP00000005107|ENSMMUT00000005423|ENSMMUG00000003831|AFM|afamin [Source:HGNC Symbol;Acc:316]	ENSP00000226355	ENSG00000079557	AFM	afamin [Source:HGNC Symbol;Acc:316]	ortholog_one2one				12	12	9	8	11	YES	YES	9	8	11	26.7	26.7	57.797	506	39	37	39	0	19.8	16.8	26.5	1921200000	519230000	819080000	582900000	54892000	14835000	23402000	16654000
893	ENSMMUP00000005119	ENSMMUP00000005119	ENSMMUT00000005438	ENSMMUG00000003840	ENSMMUP00000005119|ENSMMUT00000005438|ENSMMUG00000003840|LAT2|linker for activation of T cells family, member 2 [Source:HGNC Symbol;Acc:12749]	ENSP00000420494	ENSG00000086730	LAT2	linker for activation of T cells family, member 2 [Source:HGNC Symbol;Acc:12749]	ortholog_one2one				2	2	2	1	1	YES	YES	2	1	1	14.8	14.8	26.625	243	2	1	3	4.3709e-100	14.8	6.6	8.2	13286000	3705700	2992200	6587600	1476200	411740	332470	731960
894	ENSMMUP00000005121;ENSMMUP00000005123	ENSMMUP00000005121	ENSMMUT00000005440	ENSMMUG00000003842	ENSMMUP00000005121|ENSMMUT00000005440|ENSMMUG00000003842;									4	4	4	3	4	YES	YES	4	3	4	16.1	16.1	37.966	335	6	4	7	1.4408e-37	16.1	11.6	16.1	21923000	8497600	4759000	8666700	1044000	404650	226620	412700
895	ENSMMUP00000005124;ENSMMUP00000005125	ENSMMUP00000005124	ENSMMUT00000005443	ENSMMUG00000003843	ENSMMUP00000005124|ENSMMUT00000005443|ENSMMUG00000003843|RFC2|replication factor C (activator 1) 2, 40kDa [Source:HGNC Symbol;Acc:9970];	ENSP00000055077	ENSG00000049541	RFC2	replication factor C (activator 1) 2, 40kDa [Source:HGNC Symbol;Acc:9970]	ortholog_one2one				4	4	3	1	2	YES	YES	3	1	2	19.6	19.6	38.863	352	4	2	3	2.7507e-76	14.8	4.8	9.7	52286000	31509000	6240100	14537000	2091400	1260400	249600	581470
896	ENSMMUP00000005127	ENSMMUP00000005127	ENSMMUT00000005447	ENSMMUG00000003846	ENSMMUP00000005127|ENSMMUT00000005447|ENSMMUG00000003846|EHD4|EH-domain containing 4 [Source:HGNC Symbol;Acc:3245]	ENSP00000220325	ENSG00000103966	EHD4	EH-domain containing 4 [Source:HGNC Symbol;Acc:3245]	ortholog_one2one				19	16	18	17	16	YES	YES	15	14	13	54.5	48.8	61.247	541	33	25	29	0	52.3	50.1	50.5	749880000	283950000	241330000	224600000	23434000	8873400	7541600	7018700
898	ENSMMUP00000005139;ENSMMUP00000037019;ENSMMUP00000037018;ENSMMUP00000005136	ENSMMUP00000005139	ENSMMUT00000005460	ENSMMUG00000003854	ENSMMUP00000005139|ENSMMUT00000005460|ENSMMUG00000003854|SH3BP1|SH3-domain binding protein 1 [Source:HGNC Symbol;Acc:10824];	ENSP00000350018	ENSG00000100092	SH3BP1	SH3-domain binding protein 1 [Source:HGNC Symbol;Acc:10824]	ortholog_one2one				8	6	8	5	6	YES	YES	6	5	5	14.7	11.9	65.356	598	15	9	17	2.8193e-75	14.7	11.7	10.7	104060000	39146000	33460000	31450000	3251700	1223300	1045600	982810
899	ENSMMUP00000005145	ENSMMUP00000005145	ENSMMUT00000005466	ENSMMUG00000003857	ENSMMUP00000005145|ENSMMUT00000005466|ENSMMUG00000003857|NME3|non-metastatic cells 3, protein expressed in [Source:HGNC Symbol;Acc:7851]	ENSP00000219302	ENSG00000103024	NME3	NME/NM23 nucleoside diphosphate kinase 3 [Source:HGNC Symbol;Acc:7851]	ortholog_one2one				5	5	5	5	5	YES	YES	5	5	5	39.1	39.1	17.565	156	23	28	20	3.453e-68	39.1	39.1	39.1	208500000	79526000	82407000	46571000	17375000	6627200	6867200	3880900
900	ENSMMUP00000005147;ENSMMUP00000033884;ENSMMUP00000003871	ENSMMUP00000005147	ENSMMUT00000005468	ENSMMUG00000003858	ENSMMUP00000005147|ENSMMUT00000005468|ENSMMUG00000003858|RXRB|retinoid X receptor, beta [Source:HGNC Symbol;Acc:10478];	ENSP00000363817	ENSG00000204231	RXRB	retinoid X receptor, beta [Source:HGNC Symbol;Acc:10478]	ortholog_one2one				2	2	2	2	2	YES	YES	2	2	2	5.8	5.8	56.992	534	5	3	4	2.6688e-21	5.8	5.8	5.8	45146000	14654000	15713000	14780000	1612400	523340	561170	527860
901	ENSMMUP00000005154;ENSMMUP00000018239;ENSMMUP00000037929	ENSMMUP00000005154	ENSMMUT00000005475	ENSMMUG00000003863	ENSMMUP00000005154|ENSMMUT00000005475|ENSMMUG00000003863|RING1_MACMU|E3 ubiquitin-protein ligase RING1 (EC 6.3.2.-)(RING finger protein 1)(Polycomb complex protein RING1) [Source:UniProtKB/Swiss-Prot;Acc:Q8WMN5];	ENSP00000363787	ENSG00000204227	RING1	ring finger protein 1 [Source:HGNC Symbol;Acc:10018]	ortholog_one2one				3	3	3	2	1	YES	YES	3	2	1	10.4	10.4	41.394	395	5	4	3	4.4947e-09	10.4	6.3	2.8	84092000	53773000	21523000	8796000	5255800	3360800	1345200	549750
902	ENSMMUP00000005156;ENSMMUP00000005158	ENSMMUP00000005156	ENSMMUT00000005477	ENSMMUG00000003864	ENSMMUP00000005156|ENSMMUT00000005477|ENSMMUG00000003864|Q8WMN6_MACMU|Suppressor of action mutation 2-like protein Fragment [Source:UniProtKB/TrEMBL;Acc:Q8WMN6];	ENSP00000409952	ENSG00000223501	VPS52	vacuolar protein sorting 52 homolog (S. cerevisiae) [Source:HGNC Symbol;Acc:10518]	ortholog_one2one				4	4	3	2	3	YES	YES	3	2	3	5.9	5.9	82.214	723	7	4	5	8.6031e-23	3.2	3	5.8	22342000	11978000	6885400	3478900	507780	272230	156490	79067
903	ENSMMUP00000005169	ENSMMUP00000005169	ENSMMUT00000005490	ENSMMUG00000003874	ENSMMUP00000005169|ENSMMUT00000005490|ENSMMUG00000003874|CTSD|cathepsin D [Source:HGNC Symbol;Acc:2529]	ENSP00000236671	ENSG00000117984	CTSD	cathepsin D [Source:HGNC Symbol;Acc:2529]	ortholog_one2one				13	13	13	12	9	YES	YES	13	12	9	44.9	44.9	44.731	412	178	194	151	0	44.9	41.3	28.2	17087000000	5506700000	6690600000	4889900000	711960000	229450000	278780000	203740000
905	ENSMMUP00000005178;ENSMMUP00000005177	ENSMMUP00000005178	ENSMMUT00000005500	ENSMMUG00000003878	ENSMMUP00000005178|ENSMMUT00000005500|ENSMMUG00000003878|PGCP|Plasma glutamate carboxypeptidase Precursor (EC 3.4.17.-) [Source:UniProtKB/Swiss-Prot;Acc:Q9Y646];	ENSP00000220763	ENSG00000104324	CPQ	carboxypeptidase Q [Source:HGNC Symbol;Acc:16910]	ortholog_one2one				7	7	7	5	6	YES	YES	7	5	6	22.2	22.2	59.888	540	9	6	7	8.7684e-63	22.2	14.6	20.4	213310000	62726000	75294000	75295000	8888100	2613600	3137300	3137300
906	ENSMMUP00000005187	ENSMMUP00000005187	ENSMMUT00000005511	ENSMMUG00000003890	ENSMMUP00000005187|ENSMMUT00000005511|ENSMMUG00000003890|CYFIP1|cytoplasmic FMR1 interacting protein 1 [Source:HGNC Symbol;Acc:13759]	ENSP00000324549	ENSG00000068793	CYFIP1	cytoplasmic FMR1 interacting protein 1 [Source:HGNC Symbol;Acc:13759]	ortholog_one2one				21	14	20	18	17	YES	YES	13	12	11	20.9	13.4	144.99	1251	64	56	60	0	19.6	17.3	16.5	1512700000	521120000	519440000	472090000	20721000	7138600	7115600	6467000
907	ENSMMUP00000005194;ENSMMUP00000041239;ENSMMUP00000041238;ENSMMUP00000041237;ENSMMUP00000041236;ENSMMUP00000005195	ENSMMUP00000005194	ENSMMUT00000005518	ENSMMUG00000003896	ENSMMUP00000005194|ENSMMUT00000005518|ENSMMUG00000003896|ARHGAP6|Rho GTPase activating protein 6 [Source:HGNC Symbol;Acc:676];	ENSP00000338967	ENSG00000047648	ARHGAP6	Rho GTPase activating protein 6 [Source:HGNC Symbol;Acc:676]	ortholog_one2one				3	3	3	2	2	YES	YES	3	2	2	5.1	5.1	106.29	977	4	3	3	1.9499e-18	5.1	3.4	3.6	39199000	11833000	11920000	15446000	768610	232020	233730	302860
908	ENSMMUP00000031535;ENSMMUP00000005203	ENSMMUP00000031535	ENSMMUT00000038435	ENSMMUG00000003904	ENSMMUP00000031535|ENSMMUT00000038435|ENSMMUG00000003904|NUCB1|nucleobindin 1 [Source:HGNC Symbol;Acc:8043];	ENSP00000385923	ENSG00000104805	NUCB1	nucleobindin 1 [Source:HGNC Symbol;Acc:8043]	ortholog_one2one	ENSMUSP00000001548	ENSMUSG00000001507	ortholog_one2one	5	5	4	3	4	YES	YES	4	3	4	13.3	13.3	53.43	466	10	12	14	1.2458e-41	13.3	8.4	8.4	269130000	39781000	101950000	127400000	8681700	1283300	3288700	4109800
910	ENSMMUP00000005205	ENSMMUP00000005205	ENSMMUT00000005529	ENSMMUG00000003905	ENSMMUP00000005205|ENSMMUT00000005529|ENSMMUG00000003905|DHDH|dihydrodiol dehydrogenase (dimeric) [Source:HGNC Symbol;Acc:17887]	ENSP00000221403	ENSG00000104808	DHDH	dihydrodiol dehydrogenase (dimeric) [Source:HGNC Symbol;Acc:17887]	ortholog_one2one				2	2	1	1	2	YES	YES	1	1	2	11.5	11.5	35.912	330	2	2	3	1.8535e-15	8.2	8.2	11.5	161070000	90785000	32758000	37526000	8477300	4778200	1724100	1975000
911	ENSMMUP00000005209;ENSMMUP00000005212;ENSMMUP00000005211	ENSMMUP00000005209	ENSMMUT00000005533	ENSMMUG00000003907	ENSMMUP00000005209|ENSMMUT00000005533|ENSMMUG00000003907|A0EJI2_MACMU|BAX Fragment [Source:UniProtKB/TrEMBL;Acc:A0EJI2];	ENSP00000293288	ENSG00000087088	BAX	BCL2-associated X protein [Source:HGNC Symbol;Acc:959]	ortholog_one2one				3	3	3	2	1	YES	YES	3	2	1	25.5	25.5	21.208	192	3	3	2	2.5493e-36	25.5	18.8	7.8	31931000	12803000	13278000	5850100	2902900	1163900	1207100	531830
912	ENSMMUP00000005213;ENSMMUP00000036634	ENSMMUP00000005213	ENSMMUT00000005537	ENSMMUG00000003908	ENSMMUP00000005213|ENSMMUT00000005537|ENSMMUG00000003908|MEMO1|mediator of cell motility 1 pseudogene 2 [Source:HGNC Symbol;Acc:38502];	ENSP00000295065	ENSG00000162959	MEMO1	mediator of cell motility 1 [Source:HGNC Symbol;Acc:14014]	ortholog_one2one				6	6	6	5	6	YES	YES	6	5	6	32.8	32.8	34.185	299	11	11	13	9.8212e-53	32.8	25.8	32.8	157600000	59392000	38709000	59503000	7504900	2828200	1843300	2833500
913	ENSMMUP00000005216	ENSMMUP00000005216	ENSMMUT00000005540	ENSMMUG00000003909	ENSMMUP00000005216|ENSMMUT00000005540|ENSMMUG00000003909|FTL|ferritin, light polypeptide [Source:HGNC Symbol;Acc:3999]									3	3	2	3	2	YES	YES	2	3	2	36	36	19.995	175	19	18	16	1.7407e-106	16	36	16	1862800000	624980000	676220000	561620000	206980000	69443000	75135000	62402000
914	ENSMMUP00000005219;ENSMMUP00000005222	ENSMMUP00000005219	ENSMMUT00000005544	ENSMMUG00000003911	ENSMMUP00000005219|ENSMMUT00000005544|ENSMMUG00000003911|GYS1_MACMU|Glycogen [starch] synthase, muscle (EC 2.4.1.11) [Source:UniProtKB/Swiss-Prot;Acc:Q8MJ26];	ENSP00000317904	ENSG00000104812	GYS1	glycogen synthase 1 (muscle) [Source:HGNC Symbol;Acc:4706]	ortholog_one2one				10	10	8	6	9	YES	YES	8	6	9	21.3	21.3	83.82	737	18	16	23	1.9501e-71	18	14.8	21	437100000	133840000	135630000	167640000	10928000	3345900	3390700	4191000
915	ENSMMUP00000005224;ENSMMUP00000031534	ENSMMUP00000005224	ENSMMUT00000005549	ENSMMUG00000003915	ENSMMUP00000005224|ENSMMUT00000005549|ENSMMUG00000003915|RUVBL2|RuvB-like 2 (E. coli) [Source:HGNC Symbol;Acc:10475];	ENSP00000473172	ENSG00000183207	RUVBL2	RuvB-like 2 (E. coli) [Source:HGNC Symbol;Acc:10475]	ortholog_one2one				13	13	9	12	11	YES	YES	9	12	11	31.3	31.3	51.156	463	43	45	47	1.023e-283	25.7	29.2	28.3	1423800000	496850000	545690000	381270000	49097000	17133000	18817000	13147000
917	ENSMMUP00000005235;ENSMMUP00000005236	ENSMMUP00000005235	ENSMMUT00000005561	ENSMMUG00000003924	ENSMMUP00000005235|ENSMMUT00000005561|ENSMMUG00000003924|WAPAL|wings apart-like homolog (Drosophila) [Source:HGNC Symbol;Acc:23293]	ENSP00000298767	ENSG00000062650	WAPAL	wings apart-like homolog (Drosophila) [Source:HGNC Symbol;Acc:23293]	ortholog_one2one				5	5	1	2	3	YES	YES	1	2	3	7	7	140.4	1256	1	3	3	1.3242e-13	1.3	3	4	33534000	4520600	17316000	11697000	414000	55809	213780	144410
918	ENSMMUP00000032889;ENSMMUP00000005251	ENSMMUP00000032889	ENSMMUT00000039827	ENSMMUG00000003934	ENSMMUP00000032889|ENSMMUT00000039827|ENSMMUG00000003934|ARSD|arylsulfatase D [Source:HGNC Symbol;Acc:717];	ENSP00000370546	ENSG00000006756	ARSD	arylsulfatase D [Source:HGNC Symbol;Acc:717]	ortholog_one2one	ENSMUSP00000081946	ENSMUSG00000009741	ortholog_one2one	2	2	1	2	1	YES	YES	1	2	1	8.6	8.6	53.921	488	1	2	1	7.7253e-13	3.1	8.6	3.1	5208100	1766000	3442100	0	179590	60895	118690	0
919	ENSMMUP00000005260;ENSMMUP00000005261	ENSMMUP00000005260	ENSMMUT00000005586	ENSMMUG00000003942	ENSMMUP00000005260|ENSMMUT00000005586|ENSMMUG00000003942|TRPV4|transient receptor potential cation channel, subfamily V, member 4 [Source:HGNC Symbol;Acc:18083];	ENSP00000406191	ENSG00000111199	TRPV4	transient receptor potential cation channel, subfamily V, member 4 [Source:HGNC Symbol;Acc:18083]	ortholog_one2one				3	3	2	1	1	YES	YES	2	1	1	10.2	10.2	78.063	685	2	2	1	3.7883e-13	4.8	3.5	5.4	16521000	2116300	5532300	8872400	550700	70544	184410	295750
920	ENSMMUP00000029374;ENSMMUP00000029375;ENSMMUP00000005270;ENSMMUP00000005276	ENSMMUP00000029374	ENSMMUT00000031392	ENSMMUG00000022313	ENSMMUP00000029374|ENSMMUT00000031392|ENSMMUG00000022313|ATF7|activating transcription factor 7 [Source:HGNC Symbol;Acc:792];	ENSP00000466174	ENSG00000267281	ATF7	Uncharacterized protein [Source:UniProtKB/TrEMBL;Acc:K7ELQ4]	ortholog_one2one	ENSMUSP00000022169	ENSMUSG00000021665	ortholog_one2one	2	2	2	2	2	YES	YES	2	2	2	5.2	5.2	44.061	407	3	4	4	4.8119e-25	5.2	5.2	5.2	22288000	4584800	14199000	3503900	1485900	305650	946600	233590
923	ENSMMUP00000005278	ENSMMUP00000005278	ENSMMUT00000005605	ENSMMUG00000003950	ENSMMUP00000005278|ENSMMUT00000005605|ENSMMUG00000003950|NUP98|nucleoporin 98kDa [Source:HGNC Symbol;Acc:8068]									12	12	9	8	11	YES	YES	9	8	11	16.3	16.3	144.04	1354	19	17	24	9.1897e-77	12	10.9	14.8	343060000	139100000	88334000	115630000	6472900	2624600	1666700	2181600
924	ENSMMUP00000005284	ENSMMUP00000005284	ENSMMUT00000005611	ENSMMUG00000003957	ENSMMUP00000005284|ENSMMUT00000005611|ENSMMUG00000003957|RHOG|ras homolog gene family, member G (rho G) [Source:HGNC Symbol;Acc:672]	ENSP00000339467	ENSG00000177105	RHOG	ras homolog family member G [Source:HGNC Symbol;Acc:672]	ortholog_one2one				4	4	4	4	3	YES	YES	4	4	3	30.4	30.4	21.294	191	11	12	11	1.5282e-70	30.4	30.4	29.3	370180000	113630000	175250000	81308000	30848000	9468900	14604000	6775700
925	ENSMMUP00000005288	ENSMMUP00000005288	ENSMMUT00000005615	ENSMMUG00000003958	ENSMMUP00000005288|ENSMMUT00000005615|ENSMMUG00000003958|STIM1|stromal interaction molecule 1 [Source:HGNC Symbol;Acc:11386]	ENSP00000300737	ENSG00000167323	STIM1	stromal interaction molecule 1 [Source:HGNC Symbol;Acc:11386]	ortholog_one2one				6	5	5	4	5	YES	YES	5	3	4	14.5	12.1	77.352	684	13	13	14	5.5939e-44	12.1	8.8	11.1	242210000	87508000	79003000	75702000	6374000	2302900	2079000	1992100
926	ENSMMUP00000005291	ENSMMUP00000005291	ENSMMUT00000005619	ENSMMUG00000003962	ENSMMUP00000005291|ENSMMUT00000005619|ENSMMUG00000003962|RRM1|ribonucleotide reductase M1 [Source:HGNC Symbol;Acc:10451]	ENSP00000300738	ENSG00000167325	RRM1	ribonucleotide reductase M1 [Source:HGNC Symbol;Acc:10451]	ortholog_one2one				6	6	5	6	5	YES	YES	5	6	5	10.4	10.4	90.127	792	10	10	11	6.4842e-84	8.7	10.4	8.7	150300000	41538000	52467000	56293000	3340000	923070	1165900	1251000
927	ENSMMUP00000005294;ENSMMUP00000034784	ENSMMUP00000005294	ENSMMUT00000005623	ENSMMUG00000003966	ENSMMUP00000005294|ENSMMUT00000005623|ENSMMUG00000003966|LOC721774;	ENSP00000281623	ENSG00000151876	FBXO4	F-box protein 4 [Source:HGNC Symbol;Acc:13583]	ortholog_one2one				2	2	1	1	2	YES	YES	1	1	2	10.9	10.9	44.069	387	2	2	2	4.3094e-18	4.9	5.9	10.9	13687000	8254000	2221000	3212300	720380	434420	116900	169070
928	ENSMMUP00000005295	ENSMMUP00000005295	ENSMMUT00000005625	ENSMMUG00000003968	ENSMMUP00000005295|ENSMMUT00000005625|ENSMMUG00000003968|C5orf51|UPF0600 protein C5orf51 [Source:UniProtKB/Swiss-Prot;Acc:A6NDU8]	ENSP00000371061	ENSG00000205765	C5orf51	chromosome 5 open reading frame 51 [Source:HGNC Symbol;Acc:27750]	ortholog_one2one				4	4	4	3	3	YES	YES	4	3	3	20.7	20.7	33.645	294	10	8	7	8.8399e-150	20.7	15.3	15.3	294560000	95913000	72599000	126050000	16365000	5328500	4033300	7002900
929	ENSMMUP00000005300	ENSMMUP00000005300	ENSMMUT00000005630	ENSMMUG00000003972	ENSMMUP00000005300|ENSMMUT00000005630|ENSMMUG00000003972|EHD1|EH-domain containing 1 [Source:HGNC Symbol;Acc:3242]	ENSP00000320516	ENSG00000110047	EHD1	EH-domain containing 1 [Source:HGNC Symbol;Acc:3242]	ortholog_one2one				26	20	24	23	25	YES	YES	18	17	19	63.1	46.3	60.626	534	84	85	80	0	63.1	59	63.1	2895600000	933710000	1076100000	885720000	87744000	28294000	32610000	26840000
931	ENSMMUP00000005324	ENSMMUP00000005324	ENSMMUT00000005657	ENSMMUG00000003992	ENSMMUP00000005324|ENSMMUT00000005657|ENSMMUG00000003992|SNRPD1|small nuclear ribonucleoprotein D1 polypeptide 16kDa [Source:HGNC Symbol;Acc:11158]	ENSP00000300413	ENSG00000167088	SNRPD1	small nuclear ribonucleoprotein D1 polypeptide 16kDa [Source:HGNC Symbol;Acc:11158]	apparent_ortholog_one2one				3	3	3	2	2	YES	YES	3	2	2	45.4	45.4	13.281	119	14	10	9	1.3279e-59	45.4	27.7	27.7	316200000	135090000	116870000	64239000	63240000	27018000	23375000	12848000
934	ENSMMUP00000033625;ENSMMUP00000005328;ENSMMUP00000005329	ENSMMUP00000033625	ENSMMUT00000040573	ENSMMUG00000003996	ENSMMUP00000033625|ENSMMUT00000040573|ENSMMUG00000003996|HNRNPAB|heterogeneous nuclear ribonucleoprotein A/B [Source:HGNC Symbol;Acc:5034];	ENSP00000351108	ENSG00000197451	HNRNPAB	heterogeneous nuclear ribonucleoprotein A/B [Source:HGNC Symbol;Acc:5034]	ortholog_one2one	ENSMUSP00000000356	ENSMUSG00000000346	ortholog_one2one	8	8	8	8	8	YES	YES	8	8	8	21.4	21.4	35.983	332	60	43	53	1.4651e-137	21.4	21.4	21.4	1988600000	728930000	720890000	538770000	152970000	56071000	55453000	41443000
937	ENSMMUP00000005342;ENSMMUP00000034564;ENSMMUP00000026830	ENSMMUP00000005342	ENSMMUT00000005675	ENSMMUG00000004005	ENSMMUP00000005342|ENSMMUT00000005675|ENSMMUG00000004005|SMARCE1|SWI/SNF related, matrix associated, actin dependent regulator of chromatin, subfamily e, member 1 [Source:HGNC Symbol;Acc:11109];	ENSP00000323967	ENSG00000073584	SMARCE1	SWI/SNF related, matrix associated, actin dependent regulator of chromatin, subfamily e, member 1 [Source:HGNC Symbol;Acc:11109]	ortholog_one2one				4	4	3	4	2	YES	YES	3	4	2	16.3	16.3	46.649	411	11	11	8	2.7502e-37	12.7	16.3	9.2	266440000	109090000	85296000	72048000	11584000	4743200	3708500	3132500
938	ENSMMUP00000005346	ENSMMUP00000005346	ENSMMUT00000005679	ENSMMUG00000004009	ENSMMUP00000005346|ENSMMUT00000005679|ENSMMUG00000004009|OPLAH|5-oxoprolinase (ATP-hydrolysing) [Source:HGNC Symbol;Acc:8149]									8	8	6	5	7	YES	YES	6	5	7	10.7	10.7	134.54	1257	14	11	16	5.9093e-70	8.4	6	9.9	254960000	127050000	54162000	73746000	4321400	2153400	918000	1249900
940	ENSMMUP00000005360	ENSMMUP00000005360	ENSMMUT00000005693	ENSMMUG00000004017	ENSMMUP00000005360|ENSMMUT00000005693|ENSMMUG00000004017|NP_001107831.1|apolipoprotein B mRNA editing enzyme, catalytic polypeptide-like 3C [Source:RefSeq peptide;Acc:NP_001107831]	ENSP00000355340	ENSG00000244509	APOBEC3C	apolipoprotein B mRNA editing enzyme, catalytic polypeptide-like 3C [Source:HGNC Symbol;Acc:17353]	ortholog_one2one				3	3	3	2	3	YES	YES	3	2	3	18.6	18.6	24.902	210	5	3	3	1.4794e-70	18.6	12.9	18.6	117320000	52606000	30785000	33927000	10665000	4782300	2798600	3084300
942	ENSMMUP00000005369	ENSMMUP00000005369	ENSMMUT00000005704	ENSMMUG00000004025	ENSMMUP00000005369|ENSMMUT00000005704|ENSMMUG00000004025|UBR7|ubiquitin protein ligase E3 component n-recognin 7 (putative) [Source:HGNC Symbol;Acc:20344]	ENSP00000013070	ENSG00000012963	UBR7	ubiquitin protein ligase E3 component n-recognin 7 (putative) [Source:HGNC Symbol;Acc:20344]	ortholog_one2one				4	4	4	3	3	YES	YES	4	3	3	6.1	6.1	48.011	425	4	5	3	6.0272e-35	6.1	5.9	6.1	28055000	8370600	14924000	4760700	1122200	334820	596960	190430
944	ENSMMUP00000005390;ENSMMUP00000036584	ENSMMUP00000005390	ENSMMUT00000005726	ENSMMUG00000004040	ENSMMUP00000005390|ENSMMUT00000005726|ENSMMUG00000004040|HAAO|3-hydroxyanthranilate 3,4-dioxygenase [Source:HGNC Symbol;Acc:4796];	ENSP00000294973	ENSG00000162882	HAAO	3-hydroxyanthranilate 3,4-dioxygenase [Source:HGNC Symbol;Acc:4796]	ortholog_one2one				6	6	5	5	5	YES	YES	5	5	5	30.3	30.3	33.964	300	10	14	14	5.2518e-63	23	30.3	27	104060000	24827000	51281000	27950000	5476700	1306700	2699000	1471000
945	ENSMMUP00000005397;ENSMMUP00000005399;ENSMMUP00000032730	ENSMMUP00000005397	ENSMMUT00000005733	ENSMMUG00000004041	ENSMMUP00000005397|ENSMMUT00000005733|ENSMMUG00000004041|ABCD4|ATP-binding cassette, sub-family D (ALD), member 4 [Source:HGNC Symbol;Acc:68];	ENSP00000349396	ENSG00000119688	ABCD4	ATP-binding cassette, sub-family D (ALD), member 4 [Source:HGNC Symbol;Acc:68]	ortholog_one2one				2	2	1	1	2	YES	YES	1	1	2	5.6	5.6	68.589	606	1	1	2	1.6184e-07	2.1	2.1	5.6	3915000	677200	223120	3014700	115150	19918	6562.3	88666
947	ENSMMUP00000005410	ENSMMUP00000005410	ENSMMUT00000005747	ENSMMUG00000004052	ENSMMUP00000005410|ENSMMUT00000005747|ENSMMUG00000004052|PDE12|phosphodiesterase 12 [Source:HGNC Symbol;Acc:25386]	ENSP00000309142	ENSG00000174840	PDE12	phosphodiesterase 12 [Source:HGNC Symbol;Acc:25386]	ortholog_one2one				4	4	2	3	3	YES	YES	2	3	3	10.8	10.8	67.265	609	4	7	6	1.8055e-16	5.9	7.9	8.9	100090000	28841000	45639000	25605000	3849400	1109300	1755400	984810
948	ENSMMUP00000005412	ENSMMUP00000005412	ENSMMUT00000005749	ENSMMUG00000004051	ENSMMUP00000005412|ENSMMUT00000005749|ENSMMUG00000004051|LOC721201	ENSP00000345974	ENSG00000132199	ENOSF1	enolase superfamily member 1 [Source:HGNC Symbol;Acc:30365]	ortholog_one2one				3	1	2	2	3	YES	YES	0	0	1	19.1	9.5	40.533	367			1	1.8213e-17	9.5	9.5	19.1	16860000	0	0	16860000	766380	0	0	766380
949	ENSMMUP00000005414	ENSMMUP00000005414	ENSMMUT00000005751	ENSMMUG00000004051	ENSMMUP00000005414|ENSMMUT00000005751|ENSMMUG00000004051|LOC721201	ENSP00000345974	ENSG00000132199	ENOSF1	enolase superfamily member 1 [Source:HGNC Symbol;Acc:30365]	ortholog_one2one				3	1	3	3	3	YES	YES	1	1	1	15.3	5	38.466	340	7	9	6	1.1381e-30	15.3	15.3	15.3	475390000	120860000	163950000	190570000	22637000	5755400	7807100	9075000
950	ENSMMUP00000005417	ENSMMUP00000005417	ENSMMUT00000005754	ENSMMUG00000004054	ENSMMUP00000005417|ENSMMUT00000005754|ENSMMUG00000004054|YES1|v-yes-1 Yamaguchi sarcoma viral oncogene homolog 1 [Source:HGNC Symbol;Acc:12841]	ENSP00000462468	ENSG00000176105	YES1	v-yes-1 Yamaguchi sarcoma viral oncogene homolog 1 [Source:HGNC Symbol;Acc:12841]	ortholog_one2one				5	4	4	4	5	YES	YES	3	3	4	15.8	13.8	60.785	543	25	21	22	4.3797e-62	11.4	11.4	15.8	142040000	38024000	60022000	43995000	4734700	1267500	2000700	1466500
951	ENSMMUP00000005427;ENSMMUP00000032641;ENSMMUP00000032643	ENSMMUP00000005427	ENSMMUT00000005764	ENSMMUG00000004059	ENSMMUP00000005427|ENSMMUT00000005764|ENSMMUG00000004059|USP7|ubiquitin specific peptidase 7 (herpes virus-associated) [Source:HGNC Symbol;Acc:12630];	ENSP00000343535	ENSG00000187555	USP7	ubiquitin specific peptidase 7 (herpes virus-associated) [Source:HGNC Symbol;Acc:12630]	ortholog_one2one				25	25	24	21	21	YES	YES	24	21	21	33.4	33.4	128.83	1109	67	65	69	0	33.1	29.4	29.8	2030600000	655330000	671290000	703980000	29862000	9637300	9871900	10353000
953	ENSMMUP00000005433;ENSMMUP00000032105;ENSMMUP00000032107;ENSMMUP00000032106;ENSMMUP00000032104	ENSMMUP00000005433	ENSMMUT00000005770	ENSMMUG00000004064	ENSMMUP00000005433|ENSMMUT00000005770|ENSMMUG00000004064|ATP6V1H|ATPase, H+ transporting, lysosomal 50/57kDa, V1 subunit H [Source:HGNC Symbol;Acc:18303];	ENSP00000352522	ENSG00000047249	ATP6V1H	ATPase, H+ transporting, lysosomal 50/57kDa, V1 subunit H [Source:HGNC Symbol;Acc:18303]	ortholog_one2one				9	9	7	6	6	YES	YES	7	6	6	24.6	24.6	53.76	463	26	33	29	1.0783e-240	17.7	15.3	19	708820000	184110000	292360000	232350000	28353000	7364400	11694000	9294200
955	ENSMMUP00000005437	ENSMMUP00000005437	ENSMMUT00000005774	ENSMMUG00000004067	ENSMMUP00000005437|ENSMMUT00000005774|ENSMMUG00000004067|XPNPEP3|X-prolyl aminopeptidase (aminopeptidase P) 3, putative [Source:HGNC Symbol;Acc:28052]	ENSP00000349658	ENSG00000196236	XPNPEP3	X-prolyl aminopeptidase (aminopeptidase P) 3, putative [Source:HGNC Symbol;Acc:28052]	ortholog_one2one				4	4	3	3	3	YES	YES	3	3	3	21.2	21.2	35.013	311	6	5	7	2.8762e-24	16.7	13.8	16.7	23712000	6978300	6972800	9760500	1129100	332300	332040	464790
956	ENSMMUP00000005451	ENSMMUP00000005451	ENSMMUT00000005789	ENSMMUG00000004080	ENSMMUP00000005451|ENSMMUT00000005789|ENSMMUG00000004080|GNB2|guanine nucleotide binding protein (G protein), beta polypeptide 2 [Source:HGNC Symbol;Acc:4398]	ENSP00000305260	ENSG00000172354	GNB2	guanine nucleotide binding protein (G protein), beta polypeptide 2 [Source:HGNC Symbol;Acc:4398]	ortholog_one2one				2	1	2	2	2	YES	YES	1	1	1	15.6	10.1	21.615	199	7	5	3	1.381e-35	15.6	15.6	15.6	158920000	53938000	88193000	16791000	22703000	7705500	12599000	2398700
957	ENSMMUP00000005458;ENSMMUP00000005456	ENSMMUP00000005458	ENSMMUT00000005796	ENSMMUG00000004079	ENSMMUP00000005458|ENSMMUT00000005796|ENSMMUG00000004079|LOC704400;	ENSP00000420617	ENSG00000171109	MFN1	mitofusin 1 [Source:HGNC Symbol;Acc:18262]	ortholog_one2one				2	2	2	1	2	YES	YES	2	1	2	3.4	3.4	84.069	741	3	5	4	1.9404e-09	3.4	1.9	3.4	25421000	8130200	9557700	7732800	508410	162600	191150	154660
958	ENSMMUP00000005459	ENSMMUP00000005459	ENSMMUT00000005797	ENSMMUG00000004083	ENSMMUP00000005459|ENSMMUT00000005797|ENSMMUG00000004083|GNB4|guanine nucleotide binding protein (G protein), beta polypeptide 4 [Source:HGNC Symbol;Acc:20731]	ENSP00000232564	ENSG00000114450	GNB4	guanine nucleotide binding protein (G protein), beta polypeptide 4 [Source:HGNC Symbol;Acc:20731]	ortholog_one2one				8	7	7	6	7	YES	YES	6	5	6	35.9	32.6	37.567	340	15	12	13	1.0554e-73	30	32.4	30	1843000000	731610000	359990000	751420000	131640000	52258000	25713000	53673000
959	ENSMMUP00000005464	ENSMMUP00000005464	ENSMMUT00000005802	ENSMMUG00000004087	ENSMMUP00000005464|ENSMMUT00000005802|ENSMMUG00000004087|C7orf27|BRCA1-associated protein required for ATM activation protein 1 [Source:UniProtKB/Swiss-Prot;Acc:Q6PJG6]	ENSP00000339637	ENSG00000106009	BRAT1	BRCA1-associated ATM activator 1 [Source:HGNC Symbol;Acc:21701]	ortholog_one2one				4	3	4	2	2	YES	YES	3	1	1	5.5	4.7	88.222	823	8	3	4	4.7929e-149	5.5	2.2	2.2	16599000	8612800	2449100	5537600	331990	172260	48981	110750
960	ENSMMUP00000005469;ENSMMUP00000038871	ENSMMUP00000005469	ENSMMUT00000005807	ENSMMUG00000004093	ENSMMUP00000005469|ENSMMUT00000005807|ENSMMUG00000004093|LOC713673;	ENSP00000451211	ENSG00000139350	NEDD1	neural precursor cell expressed, developmentally down-regulated 1 [Source:HGNC Symbol;Acc:7723]	ortholog_one2one				2	2	1	1	1	YES	YES	1	1	1	6.4	6.4	71.954	660	1	1	1	0.00010258	1.7	4.7	4.7	20507000	0	9444200	11063000	603140	0	277770	325370
961	ENSMMUP00000005471;ENSMMUP00000005473;ENSMMUP00000005472;ENSMMUP00000019934	ENSMMUP00000005471	ENSMMUT00000005809	ENSMMUG00000004094	ENSMMUP00000005471|ENSMMUT00000005809|ENSMMUG00000004094;	ENSP00000367086	ENSG00000097021	ACOT7	acyl-CoA thioesterase 7 [Source:HGNC Symbol;Acc:24157]	ortholog_one2one				2	2	2	1	1	YES	YES	2	1	1	6.1	6.1	41.896	379	2	1	1	7.5904e-17	6.1	3.2	2.9	13742000	5502000	2915100	5325100	763460	305670	161950	295840
963	ENSMMUP00000005483;ENSMMUP00000025159	ENSMMUP00000005483	ENSMMUT00000005821	ENSMMUG00000004101	ENSMMUP00000005483|ENSMMUT00000005821|ENSMMUG00000004101|VPS26A|vacuolar protein sorting 26 homolog A (S. pombe) [Source:HGNC Symbol;Acc:12711];	ENSP00000362480	ENSG00000122958	VPS26A	vacuolar protein sorting 26 homolog A (S. pombe) [Source:HGNC Symbol;Acc:12711]	ortholog_one2one				8	7	8	7	6	YES	YES	7	6	5	41.1	39	38.038	326	20	16	22	7.3812e-63	41.1	33.7	30.1	591070000	252730000	203580000	134760000	25699000	10988000	8851400	5859300
965	ENSMMUP00000005502;ENSMMUP00000005505	ENSMMUP00000005502	ENSMMUT00000005842	ENSMMUG00000004112	ENSMMUP00000005502|ENSMMUT00000005842|ENSMMUG00000004112|MRE11A|MRE11 meiotic recombination 11 homolog A (S. cerevisiae) [Source:HGNC Symbol;Acc:7230];	ENSP00000325863	ENSG00000020922	MRE11A	MRE11 meiotic recombination 11 homolog A (S. cerevisiae) [Source:HGNC Symbol;Acc:7230]	ortholog_one2one				9	9	9	9	8	YES	YES	9	9	8	19.1	19.1	80.289	705	24	25	21	2.9614e-108	19.1	19.1	15.9	486600000	157300000	195930000	133360000	13151000	4251400	5295500	3604300
966	ENSMMUP00000005514;ENSMMUP00000011305	ENSMMUP00000005514	ENSMMUT00000005854	ENSMMUG00000004124	ENSMMUP00000005514|ENSMMUT00000005854|ENSMMUG00000004124|HSPB1|heat shock 27kDa protein 1 [Source:HGNC Symbol;Acc:5246]									10	10	10	9	9	YES	YES	10	9	9	62	62	22.782	205	115	120	104	4.8136e-211	62	62	62	16012000000	4629700000	7137400000	4245300000	1143700000	330690000	509810000	303230000
967	ENSMMUP00000005516	ENSMMUP00000005516	ENSMMUT00000005856	ENSMMUG00000004125	ENSMMUP00000005516|ENSMMUT00000005856|ENSMMUG00000004125|YWHAG|tyrosine 3-monooxygenase/tryptophan 5-monooxygenase activation protein, gamma polypeptide [Source:HGNC Symbol;Acc:12852]	ENSP00000306330	ENSG00000170027	YWHAG	tyrosine 3-monooxygenase/tryptophan 5-monooxygenase activation protein, gamma polypeptide [Source:HGNC Symbol;Acc:12852]	ortholog_one2one				7	5	7	6	4	YES	YES	5	4	3	50.2	39.7	28.302	247	19	15	16	0	50.2	42.1	27.9	1332700000	346020000	542000000	444700000	74040000	19223000	30111000	24705000
969	ENSMMUP00000036917;ENSMMUP00000036920;ENSMMUP00000005525	ENSMMUP00000036917	ENSMMUT00000043923	ENSMMUG00000004132	ENSMMUP00000036917|ENSMMUT00000043923|ENSMMUG00000004132|NUP50;	ENSP00000345895	ENSG00000093000	NUP50	nucleoporin 50kDa [Source:HGNC Symbol;Acc:8065]	ortholog_one2one				2	2	1	2	1	YES	YES	1	2	1	7.9	7.9	50.132	468	5	8	6	6.9766e-11	4.7	7.9	4.7	47556000	11536000	20948000	15073000	1486100	360490	654610	471030
970	ENSMMUP00000005531	ENSMMUP00000005531	ENSMMUT00000005874	ENSMMUG00000004140	ENSMMUP00000005531|ENSMMUT00000005874|ENSMMUG00000004140|NUP35|nucleoporin 35kDa [Source:HGNC Symbol;Acc:29797]	ENSP00000295119	ENSG00000163002	NUP35	nucleoporin 35kDa [Source:HGNC Symbol;Acc:29797]	ortholog_one2one				4	4	2	2	4	YES	YES	2	2	4	21.5	21.5	34.787	326	2	2	5	2.4221e-19	13.2	13.2	21.5	33411000	3630500	7346800	22434000	2227400	242030	489790	1495600
971	ENSMMUP00000005536	ENSMMUP00000005536	ENSMMUT00000005879	ENSMMUG00000004142	ENSMMUP00000005536|ENSMMUT00000005879|ENSMMUG00000004142|THTPA|thiamine triphosphatase [Source:HGNC Symbol;Acc:18987]	ENSP00000288014	ENSG00000259431	THTPA	thiamine triphosphatase [Source:HGNC Symbol;Acc:18987]	ortholog_one2one				2	2	1	2	1	YES	YES	1	2	1	21.7	21.7	25.37	230	5	6	4	1.0986e-189	8.3	21.7	8.3	135550000	50502000	43177000	41872000	9682200	3607300	3084100	2990900
972	ENSMMUP00000005539;ENSMMUP00000005541	ENSMMUP00000005539	ENSMMUT00000005882	ENSMMUG00000004146	ENSMMUP00000005539|ENSMMUT00000005882|ENSMMUG00000004146|RBBP9|retinoblastoma binding protein 9 [Source:HGNC Symbol;Acc:9892];	ENSP00000336866	ENSG00000089050	RBBP9	retinoblastoma binding protein 9 [Source:HGNC Symbol;Acc:9892]	ortholog_one2one				5	5	5	4	4	YES	YES	5	4	4	47.3	47.3	21.053	186	11	13	10	1.0065e-45	47.3	35.5	35.5	308640000	118010000	109900000	80730000	23742000	9077900	8453700	6210000
973	ENSMMUP00000005543;ENSMMUP00000013347	ENSMMUP00000005543	ENSMMUT00000005886	ENSMMUG00000004145	ENSMMUP00000005543|ENSMMUT00000005886|ENSMMUG00000004145|XP_001099473.1									13	4	12	11	11	YES	YES	3	4	4	21.9	6.1	58.462	540	35	39	48	2.0833e-263	21.9	17.6	17.6	3925100000	1353400000	1226500000	1345200000	103290000	35617000	32275000	35400000
974	ENSMMUP00000005549;ENSMMUP00000005550;ENSMMUP00000005551	ENSMMUP00000005549	ENSMMUT00000005892	ENSMMUG00000004144	ENSMMUP00000005549|ENSMMUT00000005892|ENSMMUG00000004144|AP1G2;	ENSP00000312442	ENSG00000213983	AP1G2	adaptor-related protein complex 1, gamma 2 subunit [Source:HGNC Symbol;Acc:556]	ortholog_one2one				5	5	3	4	4	YES	YES	3	4	4	10.7	10.7	86.948	785	8	8	8	4.904e-32	6.8	8.4	8.2	57496000	15468000	24477000	17551000	1277700	343740	543940	390020
975	ENSMMUP00000005561;ENSMMUP00000036720;ENSMMUP00000005560	ENSMMUP00000005561	ENSMMUT00000005904	ENSMMUG00000004153	ENSMMUP00000005561|ENSMMUT00000005904|ENSMMUG00000004153|ATM|ataxia telangiectasia mutated [Source:HGNC Symbol;Acc:795];	ENSP00000278616	ENSG00000149311	ATM	ataxia telangiectasia mutated [Source:HGNC Symbol;Acc:795]	ortholog_one2one				17	17	14	12	9	YES	YES	14	12	9	7.8	7.8	338.21	2951	22	19	15	7.3897e-88	6.8	5.6	4.1	129010000	45332000	53633000	30046000	671930	236100	279340	156490
977	ENSMMUP00000005564	ENSMMUP00000005564	ENSMMUT00000005908	ENSMMUG00000004160	ENSMMUP00000005564|ENSMMUT00000005908|ENSMMUG00000004160|ATPBD4|ATP binding domain 4 [Source:HGNC Symbol;Acc:30543]	ENSP00000256538	ENSG00000134146	ATPBD4	ATP binding domain 4 [Source:HGNC Symbol;Acc:30543]	ortholog_one2one				3	3	1	1	3	YES	YES	1	1	3	16.4	16.4	30.591	269	1	2	4	1.0886e-12	8.6	8.6	16.4	22096000	4177500	7672200	10246000	1473100	278500	511480	683070
978	ENSMMUP00000005565;ENSMMUP00000005567;ENSMMUP00000005568	ENSMMUP00000005565	ENSMMUT00000005909	ENSMMUG00000004161	ENSMMUP00000005565|ENSMMUT00000005909|ENSMMUG00000004161|ACAT1|acetyl-CoA acetyltransferase 1 [Source:HGNC Symbol;Acc:93];	ENSP00000265838	ENSG00000075239	ACAT1	acetyl-CoA acetyltransferase 1 [Source:HGNC Symbol;Acc:93]	ortholog_one2one				10	10	7	8	9	YES	YES	7	8	9	40.7	40.7	45.098	427	19	19	22	8.4648e-153	33.5	37	36.3	880590000	228510000	381580000	270500000	35224000	9140400	15263000	10820000
979	ENSMMUP00000005582	ENSMMUP00000005582	ENSMMUT00000005927	ENSMMUG00000004173	ENSMMUP00000005582|ENSMMUT00000005927|ENSMMUG00000004173|PFKL|phosphofructokinase, liver [Source:HGNC Symbol;Acc:8876]	ENSP00000269848	ENSG00000141959	PFKL	phosphofructokinase, liver [Source:HGNC Symbol;Acc:8876]	ortholog_one2one				11	11	10	11	10	YES	YES	10	11	10	39.8	39.8	51.397	465	32	33	36	8.8921e-271	35.7	39.8	37.4	1672400000	709030000	438050000	525320000	69683000	29543000	18252000	21888000
980	ENSMMUP00000006549;ENSMMUP00000005583;ENSMMUP00000028989	ENSMMUP00000006549	ENSMMUT00000006964	ENSMMUG00000004935	ENSMMUP00000006549|ENSMMUT00000006964|ENSMMUG00000004935|LOC722330;	ENSP00000370517	ENSG00000067057	PFKP	phosphofructokinase, platelet [Source:HGNC Symbol;Acc:8878]	ortholog_one2one				13	12	11	13	9	YES	YES	10	12	9	22.7	21.6	85.245	783	26	29	25	1.8144e-135	19.9	22.7	17.4	604340000	205740000	218110000	180480000	15108000	5143600	5452800	4512000
981	ENSMMUP00000005584;ENSMMUP00000035708;ENSMMUP00000005585;REV__ENSMMUP00000016938	ENSMMUP00000005584	ENSMMUT00000005929	ENSMMUG00000004174	ENSMMUP00000005584|ENSMMUT00000005929|ENSMMUG00000004174|C21orf2|Uncharacterized protein C21orf2 (C21orf-HUMF09G8.5)(YF5/A2) [Source:UniProtKB/Swiss-Prot;Acc:O43822];	ENSP00000344566	ENSG00000160226	C21orf2	chromosome 21 open reading frame 2 [Source:HGNC Symbol;Acc:1260]	ortholog_one2one				3	3	2	2	2	YES	YES	2	2	2	6.1	6.1	35.819	330	4	5	4	6.5734e-08	5.5	5.5	3.9	21883000	10360000	8006900	3515700	1215700	575580	444830	195310
982	ENSMMUP00000036003;ENSMMUP00000036002;ENSMMUP00000005592;ENSMMUP00000036004;ENSMMUP00000036005	ENSMMUP00000036003	ENSMMUT00000042991	ENSMMUG00000004179	ENSMMUP00000036003|ENSMMUT00000042991|ENSMMUG00000004179|LIMS2;	ENSP00000326888	ENSG00000072163	LIMS2	LIM and senescent cell antigen-like domains 2 [Source:HGNC Symbol;Acc:16084]	ortholog_one2one				2	1	2	2	2	YES	YES	1	1	1	5.8	3.2	46.425	411	3	5	5	3.7479e-08	5.8	5.8	5.8	19283000	3744900	8228800	7309200	876490	170220	374040	332230
983	ENSMMUP00000005599	ENSMMUP00000005599	ENSMMUT00000005945	ENSMMUG00000004185	ENSMMUP00000005599|ENSMMUT00000005945|ENSMMUG00000004185|IFIT2|interferon-induced protein with tetratricopeptide repeats 2 [Source:HGNC Symbol;Acc:5409]	ENSP00000360891	ENSG00000119922	IFIT2	interferon-induced protein with tetratricopeptide repeats 2 [Source:HGNC Symbol;Acc:5409]	ortholog_one2one				3	3	2	1	2	YES	YES	2	1	2	6.6	6.6	54.522	472	3	2	4	1.2568e-23	6.6	4.2	4.2	18280000	4657400	10764000	2859000	553930	141130	326170	86636
984	ENSMMUP00000005601;ENSMMUP00000040876	ENSMMUP00000005601	ENSMMUT00000005948	ENSMMUG00000004188	ENSMMUP00000005601|ENSMMUT00000005948|ENSMMUG00000004188|LOC704908;	ENSP00000339787	ENSG00000068366	ACSL4	acyl-CoA synthetase long-chain family member 4 [Source:HGNC Symbol;Acc:3571]	ortholog_one2one				2	1	2	2	1	YES	YES	1	1	0	4.8	2.3	79.136	711	1	1		2.1723e-14	4.8	4.8	2.5	9984500	4157900	5826500	0	249610	103950	145660	0
985	ENSMMUP00000005605;ENSMMUP00000005607	ENSMMUP00000005605	ENSMMUT00000005952	ENSMMUG00000004189	ENSMMUP00000005605|ENSMMUT00000005952|ENSMMUG00000004189|FNDC3B;	ENSP00000338523	ENSG00000075420	FNDC3B	fibronectin type III domain containing 3B [Source:HGNC Symbol;Acc:24670]	ortholog_one2one				2	2	2	1	2	YES	YES	2	1	2	2.2	2.2	132.89	1204	3	1	3	2.8316e-23	2.2	1.2	2.2	19237000	9210800	3192100	6834600	384750	184220	63842	136690
987	ENSMMUP00000005620	ENSMMUP00000005620	ENSMMUT00000005968	ENSMMUG00000004204	ENSMMUP00000005620|ENSMMUT00000005968|ENSMMUG00000004204|XM_001107675.1									2	2	2	2	2	YES	YES	2	2	2	23.4	23.4	8.9582	77	4	2	6	1.9356e-12	23.4	23.4	23.4	91425000	33639000	26474000	31312000	22856000	8409600	6618500	7828100
989	ENSMMUP00000005625	ENSMMUP00000005625	ENSMMUT00000005973	ENSMMUG00000004205	ENSMMUP00000005625|ENSMMUT00000005973|ENSMMUG00000004205|PLBD2|phospholipase B domain containing 2 [Source:HGNC Symbol;Acc:27283]	ENSP00000280800	ENSG00000151176	PLBD2	phospholipase B domain containing 2 [Source:HGNC Symbol;Acc:27283]	ortholog_one2one				3	3	2	2	2	YES	YES	2	2	2	10.7	10.7	59.776	542	2	3	3	1.824e-108	7.6	8.1	8.1	26666000	11379000	9177200	6109500	987630	421450	339900	226280
990	ENSMMUP00000005628	ENSMMUP00000005628	ENSMMUT00000005977	ENSMMUG00000004209	ENSMMUP00000005628|ENSMMUT00000005977|ENSMMUG00000004209|ESD|esterase D [Source:HGNC Symbol;Acc:3465]	ENSP00000367992	ENSG00000139684	ESD	esterase D [Source:HGNC Symbol;Acc:3465]	ortholog_one2one				7	7	6	5	6	YES	YES	6	5	6	47.9	47.9	31.547	282	39	40	40	0	39.4	31.9	40.4	2359200000	1045700000	694670000	618870000	147450000	65354000	43417000	38679000
991	ENSMMUP00000005638;ENSMMUP00000003870	ENSMMUP00000005638	ENSMMUT00000005987	ENSMMUG00000004216	ENSMMUP00000005638|ENSMMUT00000005987|ENSMMUG00000004216|FUCA1|fucosidase, alpha-L- 1, tissue [Source:HGNC Symbol;Acc:4006];	ENSP00000363603	ENSG00000179163	FUCA1	fucosidase, alpha-L- 1, tissue [Source:HGNC Symbol;Acc:4006]	ortholog_one2one				12	12	10	9	11	YES	YES	10	9	11	37.8	37.8	54.277	468	95	70	92	1.8316e-184	25.2	27.4	33.8	2362800000	665400000	1100600000	596840000	102730000	28931000	47851000	25949000
992	ENSMMUP00000005644;ENSMMUP00000005645	ENSMMUP00000005644	ENSMMUT00000005994	ENSMMUG00000004222	ENSMMUP00000005644|ENSMMUT00000005994|ENSMMUG00000004222|TBXAS1|thromboxane A synthase 1 (platelet) [Source:HGNC Symbol;Acc:11609];	ENSP00000389414	ENSG00000059377	TBXAS1	thromboxane A synthase 1 (platelet) [Source:HGNC Symbol;Acc:11609]	ortholog_one2one				5	5	3	5	4	YES	YES	3	5	4	17.8	17.8	60.526	534	11	15	12	4.1576e-57	11.4	17.8	15.5	118540000	26763000	52983000	38793000	3592100	811000	1605500	1175500
993	ENSMMUP00000005647	ENSMMUP00000005647	ENSMMUT00000005997	ENSMMUG00000004225	ENSMMUP00000005647|ENSMMUT00000005997|ENSMMUG00000004225|THUMPD1|THUMP domain containing 1 [Source:HGNC Symbol;Acc:23807]	ENSP00000370741	ENSG00000066654	THUMPD1	THUMP domain containing 1 [Source:HGNC Symbol;Acc:23807]	ortholog_one2one				6	6	5	3	4	YES	YES	5	3	4	16.7	16.7	39.279	353	9	5	8	2.8392e-64	16.4	13.6	13.9	215020000	95333000	46462000	73228000	7679400	3404800	1659400	2615300
994	ENSMMUP00000005665;ENSMMUP00000005666;ENSMMUP00000030928	ENSMMUP00000005665	ENSMMUT00000006018	ENSMMUG00000004242	ENSMMUP00000005665|ENSMMUT00000006018|ENSMMUG00000004242|PEX5|peroxisomal biogenesis factor 5 [Source:HGNC Symbol;Acc:9719];	ENSP00000407401	ENSG00000139197	PEX5	peroxisomal biogenesis factor 5 [Source:HGNC Symbol;Acc:9719]	ortholog_one2one				6	6	4	3	4	YES	YES	4	3	4	16.8	16.8	69.891	631	10	10	6	2.22e-57	9.4	7	12.2	27818000	7000600	7533500	13284000	818170	205900	221570	390700
995	ENSMMUP00000005667;ENSMMUP00000005670;ENSMMUP00000033659	ENSMMUP00000005667	ENSMMUT00000006021	ENSMMUG00000004239	ENSMMUP00000005667|ENSMMUT00000006021|ENSMMUG00000004239|FBN1|fibrillin 1 [Source:HGNC Symbol;Acc:3603];	ENSP00000325527	ENSG00000166147	FBN1	fibrillin 1 [Source:HGNC Symbol;Acc:3603]	ortholog_one2one				9	9	7	5	4	YES	YES	7	5	4	6	6	312.36	2871	14	14	9	4.8605e-143	4.8	3	2.2	716960000	358720000	207880000	150360000	4453200	2228100	1291200	933910
996	ENSMMUP00000005674	ENSMMUP00000005674	ENSMMUT00000006030	ENSMMUG00000004252	ENSMMUP00000005674|ENSMMUT00000006030|ENSMMUG00000004252|EMILIN3|elastin microfibril interfacer 3 [Source:HGNC Symbol;Acc:16123]	ENSP00000332806	ENSG00000183798	EMILIN3	elastin microfibril interfacer 3 [Source:HGNC Symbol;Acc:16123]	ortholog_one2one				4	4	3	3	3	YES	YES	3	3	3	8.5	8.5	82.667	766	4	3	5	1.0576e-09	5.9	5.9	6.8	27211000	7347600	6844200	13019000	513410	138630	129140	245640
997	ENSMMUP00000005681	ENSMMUP00000005681	ENSMMUT00000006037	ENSMMUG00000004255	ENSMMUP00000005681|ENSMMUT00000006037|ENSMMUG00000004255|YLPM1|YLP motif containing 1 [Source:HGNC Symbol;Acc:17798]	ENSP00000324463	ENSG00000119596	YLPM1	YLP motif-containing protein 1 [Source:UniProtKB/Swiss-Prot;Acc:P49750]	ortholog_one2one				11	1	9	9	7	YES	YES	0	1	0	9.7	0.7	207.62	1837		1		2.4161e-61	7.8	8.2	6.3	2524000	0	2524000	0	25755	0	25755	0
998	ENSMMUP00000005685;ENSMMUP00000005679;ENSMMUP00000005688	ENSMMUP00000005685	ENSMMUT00000006041	ENSMMUG00000004255	ENSMMUP00000005685|ENSMMUT00000006041|ENSMMUG00000004255|YLPM1|YLP motif containing 1 [Source:HGNC Symbol;Acc:17798];	ENSP00000324463	ENSG00000119596	YLPM1	YLP motif-containing protein 1 [Source:UniProtKB/Swiss-Prot;Acc:P49750]	ortholog_one2one				13	3	12	11	10	YES	YES	3	3	3	11.7	2.3	198.74	1755	33	30	41	1.523e-194	10.5	10.1	8.9	488370000	115790000	215650000	156940000	5251300	1245000	2318800	1687500
999	ENSMMUP00000005696;ENSMMUP00000005698;ENSMMUP00000005697	ENSMMUP00000005696	ENSMMUT00000006052	ENSMMUG00000004260	ENSMMUP00000005696|ENSMMUT00000006052|ENSMMUG00000004260|DLST|dihydrolipoamide S-succinyltransferase (E2 component of 2-oxo-glutarate complex) [Source:HGNC Symbol;Acc:2911];	ENSP00000335304	ENSG00000119689	DLST	dihydrolipoamide S-succinyltransferase (E2 component of 2-oxo-glutarate complex) [Source:HGNC Symbol;Acc:2911]	ortholog_one2one				9	9	7	8	5	YES	YES	7	8	5	35	35	48.917	454	21	22	12	6.1444e-169	18.3	33.7	24	898250000	296730000	427310000	174210000	34548000	11413000	16435000	6700200
1000	ENSMMUP00000005726	ENSMMUP00000005726	ENSMMUT00000006082	ENSMMUG00000004278	ENSMMUP00000005726|ENSMMUT00000006082|ENSMMUG00000004278	ENSP00000432799	ENSG00000145050	MANF	mesencephalic astrocyte-derived neurotrophic factor [Source:HGNC Symbol;Acc:15461]	ortholog_one2one				3	3	2	3	2	YES	YES	2	3	2	18.5	18.5	21.007	184	6	6	6	2.2351e-14	17.4	18.5	17.4	50507000	20139000	21331000	9037100	4591500	1830800	1939200	821560
1003	ENSMMUP00000005737	ENSMMUP00000005737	ENSMMUT00000006094	ENSMMUG00000004286	ENSMMUP00000005737|ENSMMUT00000006094|ENSMMUG00000004286|NDUFS3|NADH dehydrogenase (ubiquinone) Fe-S protein 3, 30kDa (NADH-coenzyme Q reductase) [Source:HGNC Symbol;Acc:7710]	ENSP00000263774	ENSG00000213619	NDUFS3	NADH dehydrogenase (ubiquinone) Fe-S protein 3, 30kDa (NADH-coenzyme Q reductase) [Source:HGNC Symbol;Acc:7710]	ortholog_one2one				2	2	2	2	1	YES	YES	2	2	1	13.4	13.4	22.755	201	4	4	3	4.2092e-13	13.4	13.4	6.5	18257000	4825400	9483800	3948200	1141100	301590	592740	246760
1004	ENSMMUP00000005738;ENSMMUP00000005734	ENSMMUP00000005738	ENSMMUT00000006095	ENSMMUG00000004286	ENSMMUP00000005738|ENSMMUT00000006095|ENSMMUG00000004286|NDUFS3|NADH dehydrogenase (ubiquinone) Fe-S protein 3, 30kDa (NADH-coenzyme Q reductase) [Source:HGNC Symbol;Acc:7710];	ENSP00000263774	ENSG00000213619	NDUFS3	NADH dehydrogenase (ubiquinone) Fe-S protein 3, 30kDa (NADH-coenzyme Q reductase) [Source:HGNC Symbol;Acc:7710]	ortholog_one2one				12	12	11	12	9	YES	YES	11	12	9	41.7	41.7	30.229	264	41	38	39	1.0099e-168	41.7	41.7	36.4	1488800000	531610000	605580000	351630000	74441000	26580000	30279000	17582000
1005	ENSMMUP00000033085;ENSMMUP00000005740;ENSMMUP00000005741;ENSMMUP00000033082;ENSMMUP00000033081;ENSMMUP00000033083	ENSMMUP00000033085	ENSMMUT00000040015	ENSMMUG00000004290	ENSMMUP00000033085|ENSMMUT00000040015|ENSMMUG00000004290|NCOA7|nuclear receptor coactivator 7 [Source:HGNC Symbol;Acc:21081];	ENSP00000357341	ENSG00000111912	NCOA7	nuclear receptor coactivator 7 [Source:HGNC Symbol;Acc:21081]	ortholog_one2one	ENSMUSP00000029699	ENSMUSG00000028063	ortholog_one2one	4	4	2	1	2	YES	YES	2	1	2	5.6	5.6	105.16	930	2	1	2	8.198e-37	2.4	1	3.2	1823100	929770	362340	530990	31984	16312	6356.8	9315.6
1006	ENSMMUP00000005744	ENSMMUP00000005744	ENSMMUT00000006101	ENSMMUG00000004291	ENSMMUP00000005744|ENSMMUT00000006101|ENSMMUG00000004291|HINT3|histidine triad nucleotide binding protein 3 [Source:HGNC Symbol;Acc:18468]	ENSP00000229633	ENSG00000111911	HINT3	histidine triad nucleotide binding protein 3 [Source:HGNC Symbol;Acc:18468]	ortholog_one2one				2	2	2	1	2	YES	YES	2	1	2	19.2	19.2	20.392	182	4	3	6	1.2366e-08	19.2	8.2	19.2	80545000	19589000	40685000	20271000	7322200	1780800	3698600	1842800
1009	ENSMMUP00000005760;ENSMMUP00000037007	ENSMMUP00000005760	ENSMMUT00000006118	ENSMMUG00000004304	ENSMMUP00000005760|ENSMMUT00000006118|ENSMMUG00000004304|Q6UIQ8_MACMU|DEAD box polypeptide 17 Fragment [Source:UniProtKB/TrEMBL;Acc:Q6UIQ8];	ENSP00000380033	ENSG00000100201	DDX17	DEAD (Asp-Glu-Ala-Asp) box helicase 17 [Source:HGNC Symbol;Acc:2740]	ortholog_one2one				17	13	15	16	14	YES	YES	11	13	10	29.4	22.9	80.223	729	75	69	64	5.6489e-245	26.7	27.7	26.3	4838200000	1891900000	1745500000	1200800000	118010000	46143000	42574000	29288000
1011	ENSMMUP00000005765;ENSMMUP00000005764;ENSMMUP00000005766	ENSMMUP00000005765	ENSMMUT00000006124	ENSMMUG00000004311	ENSMMUP00000005765|ENSMMUT00000006124|ENSMMUG00000004311|LOC720801;	ENSP00000265388	ENSG00000064419	TNPO3	transportin 3 [Source:HGNC Symbol;Acc:17103]	ortholog_one2one				12	12	11	8	9	YES	YES	11	8	9	19.7	19.7	104.2	923	28	23	25	3.0437e-132	18.5	13	15.6	462410000	165480000	153480000	143450000	9838500	3520800	3265500	3052100
1012	ENSMMUP00000005767;ENSMMUP00000037506;ENSMMUP00000005768;ENSMMUP00000005771;ENSMMUP00000037505	ENSMMUP00000005767	ENSMMUT00000006126	ENSMMUG00000004313	ENSMMUP00000005767|ENSMMUT00000006126|ENSMMUG00000004313|PLCB1|phospholipase C, beta 1 (phosphoinositide-specific) [Source:HGNC Symbol;Acc:15917];	ENSP00000338185	ENSG00000182621	PLCB1	phospholipase C, beta 1 (phosphoinositide-specific) [Source:HGNC Symbol;Acc:15917]	ortholog_one2one				9	9	7	5	6	YES	YES	7	5	6	12.7	12.7	138.58	1216	14	14	14	2.0491e-50	10.2	6.7	8.4	75080000	14530000	40835000	19715000	1137600	220150	618720	298710
1013	ENSMMUP00000005783;ENSMMUP00000005785;ENSMMUP00000005784;ENSMMUP00000005786	ENSMMUP00000005783	ENSMMUT00000006142	ENSMMUG00000004327	ENSMMUP00000005783|ENSMMUT00000006142|ENSMMUG00000004327|CD44|CD44 molecule (Indian blood group) [Source:HGNC Symbol;Acc:1681];	ENSP00000398632	ENSG00000026508	CD44	CD44 molecule (Indian blood group) [Source:HGNC Symbol;Acc:1681]	ortholog_one2one				2	2	2	2	2	YES	YES	2	2	2	5.3	5.3	78.762	721	9	12	10	1.4174e-76	5.3	5.3	5.3	1439700000	472960000	476910000	489880000	44992000	14780000	14903000	15309000
1014	ENSMMUP00000005791;ENSMMUP00000005793;ENSMMUP00000005804;ENSMMUP00000041299;ENSMMUP00000041300	ENSMMUP00000005791	ENSMMUT00000006150	ENSMMUG00000004321	ENSMMUP00000005791|ENSMMUT00000006150|ENSMMUG00000004321|LAMA3|laminin, alpha 3 [Source:HGNC Symbol;Acc:6483]	ENSP00000324532	ENSG00000053747	LAMA3	laminin, alpha 3 [Source:HGNC Symbol;Acc:6483]	ortholog_one2one				19	17	15	15	17	YES	YES	14	13	15	9.2	8.8	367.15	3334	35	32	36	1.3326e-182	6.7	6.9	8.2	1223000000	322830000	301200000	599000000	6240000	1647100	1536800	3056100
1016	ENSMMUP00000039281;ENSMMUP00000005805;ENSMMUP00000005808;ENSMMUP00000005811	ENSMMUP00000039281	ENSMMUT00000046240	ENSMMUG00000004338	ENSMMUP00000039281|ENSMMUT00000046240|ENSMMUG00000004338|DENND4C|DENN/MADD domain containing 4C [Source:HGNC Symbol;Acc:26079];	ENSP00000369797	ENSG00000137145	DENND4C	DENN/MADD domain containing 4C [Source:HGNC Symbol;Acc:26079]	ortholog_one2one				7	7	2	6	4	YES	YES	2	6	4	6.6	6.6	180.82	1622	4	7	4	8.3063e-55	1.9	5.1	4.3	51605000	13766000	26460000	11379000	586420	156430	300690	129310
1018	ENSMMUP00000005828;ENSMMUP00000005826;ENSMMUP00000041298	ENSMMUP00000005828	ENSMMUT00000006192	ENSMMUG00000004350	ENSMMUP00000005828|ENSMMUT00000006192|ENSMMUG00000004350|Q4G3W9_MACMU|Oxysterol binding protein-like protein 1A Fragment [Source:UniProtKB/TrEMBL;Acc:Q4G3W9];	ENSP00000320291	ENSG00000141447	OSBPL1A	oxysterol binding protein-like 1A [Source:HGNC Symbol;Acc:16398]	ortholog_one2one				11	11	10	9	9	YES	YES	10	9	9	19.9	19.9	108.56	949	23	25	23	4.3054e-162	17.4	16	16.2	457910000	205340000	141250000	111320000	8033500	3602500	2478000	1953000
1020	ENSMMUP00000005853	ENSMMUP00000005853	ENSMMUT00000006222	ENSMMUG00000004380	ENSMMUP00000005853|ENSMMUT00000006222|ENSMMUG00000004380|HADHA|hydroxyacyl-CoA dehydrogenase/3-ketoacyl-CoA thiolase/enoyl-CoA hydratase (trifunctional protein), alpha subunit [Source:HGNC Symbol;Acc:4801]	ENSP00000370023	ENSG00000084754	HADHA	hydroxyacyl-CoA dehydrogenase/3-ketoacyl-CoA thiolase/enoyl-CoA hydratase (trifunctional protein), alpha subunit [Source:HGNC Symbol;Acc:4801]	ortholog_one2one				22	22	19	21	20	YES	YES	19	21	20	42.9	42.9	83.052	763	133	140	142	0	35.5	40.5	37.2	5705900000	1760000000	2272600000	1673300000	126800000	39110000	50503000	37185000
1021	ENSMMUP00000005855;ENSMMUP00000041275	ENSMMUP00000005855	ENSMMUT00000006224	ENSMMUG00000004381	ENSMMUP00000005855|ENSMMUT00000006224|ENSMMUG00000004381|HADHB|hydroxyacyl-CoA dehydrogenase/3-ketoacyl-CoA thiolase/enoyl-CoA hydratase (trifunctional protein), beta subunit [Source:HGNC Symbol;Acc:4803]	ENSP00000325136	ENSG00000138029	HADHB	hydroxyacyl-CoA dehydrogenase/3-ketoacyl-CoA thiolase/enoyl-CoA hydratase (trifunctional protein), beta subunit [Source:HGNC Symbol;Acc:4803]	ortholog_one2one				11	11	11	10	10	YES	YES	11	10	10	32.8	32.8	50.158	464	50	44	42	8.8418e-124	32.8	29.3	30.6	3115500000	1074600000	1075800000	965120000	107430000	37055000	37098000	33280000
1023	ENSMMUP00000005868;ENSMMUP00000031789	ENSMMUP00000005868	ENSMMUT00000006237	ENSMMUG00000004390	ENSMMUP00000005868|ENSMMUT00000006237|ENSMMUG00000004390|FARSA|phenylalanyl-tRNA synthetase, alpha subunit [Source:HGNC Symbol;Acc:3592];	ENSP00000320309	ENSG00000179115	FARSA	phenylalanyl-tRNA synthetase, alpha subunit [Source:HGNC Symbol;Acc:3592]	ortholog_one2one				10	10	9	10	7	YES	YES	9	10	7	37.6	37.6	57.496	508	24	32	25	0	37.4	37.6	23.4	789020000	201510000	357360000	230140000	27207000	6948700	12323000	7935900
1024	ENSMMUP00000005869	ENSMMUP00000005869	ENSMMUT00000006238	ENSMMUG00000004392	ENSMMUP00000005869|ENSMMUT00000006238|ENSMMUG00000004392|CALR|calreticulin [Source:HGNC Symbol;Acc:1455]	ENSP00000320866	ENSG00000179218	CALR	calreticulin [Source:HGNC Symbol;Acc:1455]	ortholog_one2one				13	13	13	12	13	YES	YES	13	12	13	47.7	47.7	48.113	417	117	111	142	0	47.7	45.6	47.7	26316000000	7351300000	8844800000	10119000000	974650000	272270000	327590000	374790000
1025	ENSMMUP00000005870	ENSMMUP00000005870	ENSMMUT00000006239	ENSMMUG00000004393	ENSMMUP00000005870|ENSMMUT00000006239|ENSMMUG00000004393|RAD23A|RAD23 homolog A (S. cerevisiae) [Source:HGNC Symbol;Acc:9812]	ENSP00000467024	ENSG00000179262	RAD23A	RAD23 homolog A (S. cerevisiae) [Source:HGNC Symbol;Acc:9812]	ortholog_one2one				3	3	2	2	3	YES	YES	2	2	3	37.3	37.3	29.318	271	14	17	9	2.6325e-84	21.4	21.4	37.3	119180000	26432000	64201000	28545000	9167500	2033200	4938500	2195700
1026	ENSMMUP00000005874;ENSMMUP00000035689;ENSMMUP00000035690	ENSMMUP00000005874	ENSMMUT00000006243	ENSMMUG00000004396	ENSMMUP00000005874|ENSMMUT00000006243|ENSMMUG00000004396|SUFU|suppressor of fused homolog (Drosophila) [Source:HGNC Symbol;Acc:16466];	ENSP00000358918	ENSG00000107882	SUFU	suppressor of fused homolog (Drosophila) [Source:HGNC Symbol;Acc:16466]	ortholog_one2one				4	4	2	3	2	YES	YES	2	3	2	16.1	16.1	53.946	484	5	4	4	5.9091e-54	6.2	10.3	9.1	17019000	3436600	5421800	8160600	773590	156210	246450	370940
1027	ENSMMUP00000005875;ENSMMUP00000005879	ENSMMUP00000005875	ENSMMUT00000006244	ENSMMUG00000004401	ENSMMUP00000005875|ENSMMUT00000006244|ENSMMUG00000004401|CARM1|coactivator-associated arginine methyltransferase 1 [Source:HGNC Symbol;Acc:23393];	ENSP00000325690	ENSG00000142453	CARM1	coactivator-associated arginine methyltransferase 1 [Source:HGNC Symbol;Acc:23393]	ortholog_one2one				2	2	2	1	1	YES	YES	2	1	1	5.5	5.5	61.92	566	4	1	3	7.2264e-17	5.5	3.2	3.2	35946000	18374000	2574100	14998000	1497800	765580	107250	624930
1030	ENSMMUP00000005884	ENSMMUP00000005884	ENSMMUT00000006254	ENSMMUG00000004406	ENSMMUP00000005884|ENSMMUT00000006254|ENSMMUG00000004406|PGPEP1|pyroglutamyl-peptidase I [Source:HGNC Symbol;Acc:13568]	ENSP00000269919	ENSG00000130517	PGPEP1	pyroglutamyl-peptidase I [Source:HGNC Symbol;Acc:13568]	ortholog_one2one				4	4	4	2	2	YES	YES	4	2	2	39.2	39.2	23.138	209	10	7	10	1.6094e-115	39.2	16.7	16.7	98742000	43581000	30754000	24407000	8228500	3631700	2562800	2033900
1031	ENSMMUP00000005885	ENSMMUP00000005885	ENSMMUT00000006256	ENSMMUG00000004408	ENSMMUP00000005885|ENSMMUT00000006256|ENSMMUG00000004408|SEC11C|SEC11 homolog C (S. cerevisiae) [Source:HGNC Symbol;Acc:23400]	ENSP00000468633	ENSG00000166562	SEC11C	SEC11 homolog C (S. cerevisiae) [Source:HGNC Symbol;Acc:23400]	ortholog_one2one				3	3	2	3	3	YES	YES	2	3	3	16.1	16.1	21.584	192	6	4	5	5.7667e-33	15.6	16.1	16.1	41830000	16056000	11298000	14476000	3802700	1459700	1027100	1316000
1032	ENSMMUP00000005888	ENSMMUP00000005888	ENSMMUT00000006259	ENSMMUG00000004411	ENSMMUP00000005888|ENSMMUT00000006259|ENSMMUG00000004411|CYP7B1|cytochrome P450, family 7, subfamily B, polypeptide 1 [Source:HGNC Symbol;Acc:2652]	ENSP00000310721	ENSG00000172817	CYP7B1	cytochrome P450, family 7, subfamily B, polypeptide 1 [Source:HGNC Symbol;Acc:2652]	ortholog_one2one				3	3	3	1	3	YES	YES	3	1	3	10.9	10.9	58.155	505	3	1	4	5.7311e-41	10.9	3	10.9	8583000	2570600	2701300	3311200	276870	82922	87137	106810
[truncated: 3,522 more rows]

## Sheet: overlap
Supplementary Data 1b. Overlapping genes between the rhesus ovary proteome and the human ovary proteome
[truncated: 90 more rows]
