# Supplementary material for: Unravelling the proteome of adult rhesus monkey ovaries
Source: Royal Society of Chemistry journal article supplement (doi:10.1039/c3mb70312f), 2013-11-25
Supplement: c3mb70312f_2.pdf [file c3mb70312f_2.pdf]

**Supplementary Table 8: Proteins differently expressed in PCOS ovary and normal ovary<sup>a</sup> were also identified in this proteome**

| Spot | Accession numbers | Gene symbols | Normal (% volume) n = 3 (Mean ± SD) | PCOS (% volume) n = 3 (Mean ± SD) |
|------|-------------------|--------------|-------------------------------------|-----------------------------------|
| 1    | P62333            | PSMC6        | 0.027 ± 0.011                       | 0.0581 ± 0.008*                   |
| 2    | Q9NR50            | EIF2B3       | 0                                   | 0.007 ± 0.002*                    |
| 4    | P22626            | HNRNPA2B1    | 0.030 ± 0.027                       | 0.092 ± 0.016*                    |
| 6    | P45880            | VDAC2        | 0.024 ± 0.010                       | 0.081 ± 0.007*                    |
| 8    | Q99798            | ACO2         | 0.032 ± 0.006                       | 0.061 ± 0.007*                    |
| 10   | Q96AE4            | FUBP1        | 0.013 ± 0.006                       | 0.027 ± 0.003*                    |
| 12   | Q5TCJ3            | LMNA         | 0.003 ± 0.005                       | 0.025 ± 0.007*                    |
| 13   | Q03252            | LMNB2        | 0.042 ± 0.011                       | 0.069 ± 0.010*                    |
| 15   | Q5SZY0            | CCT3         | 0.024 ± 0.005                       | 0.050 ± 0.013*                    |
| 17   | P01008            | SERPINC1     | 0.008 ± 0.003                       | 0.016 ± 0.003*                    |
| 18   | P50990            | CCT8         | 0                                   | 0.007 ± 0.001*                    |
| 19   | Q14195            | DPYSL3       | 0.006 ± 0.001                       | 0.016 ± 0.004*                    |
| 20   | Q16555            | DPYSL2       | 0.014 ± 0.002                       | 0.028 ± 0.004*                    |
| 21   | P28838            | LAP3         | 0.006 ± 0.011                       | 0.031 ± 0.009*                    |
| 22   | O75955            | FLOT1        | 0.006 ± 0.006                       | 0.023 ± 0.007*                    |
| 23   | P31153            | MAT2A        | 0.003 ± 0.006                       | 0.016 ± 0.001*                    |
| 24   | Q9UQ80            | PA2G4        | 0.007 ± 0.006                       | 0.023 ± 0.003*                    |
| 25   | P50454            | SERPINH1     | 0.008 ± 0.014                       | 0.034 ± 0.009*                    |
| 27   | Q00688            | FKBP3        | 0.001 ± 0.002                       | 0.010 ± 0.002*                    |
| 29   | P28062            | PSMB8        | 0                                   | 0.011 ± 0.003*                    |
| 32   | P42025            | ACTR1B       | 0.029 ± 0.0079                      | 0.053 ± 0.003*                    |
| 34   | Q9UNZ2            | NSFL1C       | 0.001 ± 0.001                       | 0.008 ± 0.001*                    |
| 35   | P37837            | TALDO1       | 0.014 ± 0.003                       | 0.025 ± 0.005*                    |
| 36   | Q9UIJ7            | AK3          | 0.005 ± 0.006                       | 0.022 ± 0.009*                    |
| 37   | Q5U4P6            | KHSRP        | 0.011 ± 0.009                       | 0.041 ± 0.006*                    |
| 38   | Q4QQH7            | FGA          | 0.006 ± 0.005                       | 0.021 ± 0.006*                    |
| 39   | Q9NRN5            | OLFML3       | 0.023 ± 0.008                       | 0.036 ± 0.008*                    |
| 40   | P62873            | GNB1         | 0.102 ± 0.004933                    | 0.134 ± 0.007*                    |
| 41   | P08670            | VIM          | 0                                   | 0.007 ± 0.001*                    |
| 42   | P20774            | OGN          | 0                                   | 0.045 ± 0.014*                    |
| 44   | P02679            | FGG          | 0                                   | 0.007 ± 0.001*                    |
| 45   | P49593            | PPM1F        | 0.004 ± 0.003                       | 0.013 ± 0.001*                    |
| 46   | P04075            | ALDOA        | 0.020 ± 0.002                       | 0.062 ± 0.013*                    |
| 47   | P40926            | MDH2         | 0.038 ± 0.073                       | 0.0483 ± 0.005*                   |
| 48   | P50416            | CPT1A        | 0                                   | 0.014 ± 0.002*                    |
| 49   | P17980            | PSMC3        | 0.003 ± 0.005                       | 0.011 ± 0.003*                    |
| 50   | P22392            | NME2         | 0.042 ± 0.007                       | 0.082 ± 0.018*                    |
| 43   | O94760            | DDAH1        | 0.006 ± 0.001                       | 0.011 ± 0.003*                    |
| 51   | P30086            | PEBP1        | 0.056 ± 0.013                       | 0.080 ± 0.011*                    |
| 59   | P07355            | ANXA2        | 0.038 ± 0.009                       | 0.020 ± 0.002*                    |
| 62   | O60701            | UGDH         | 0.073 ± 0.020                       | 0.021 ± 0.019*                    |
| 63   | Q16658            | FSCN1        | 0.449 ± 0.112                       | 0.168 ± 0.010*                    |
| 64   | Q969H8            | C19orf10     | 0.038 ± 0.003                       | 0.030 ± 0.002*                    |
| 65   | P40121            | CAPG         | 0.014 ± 0.004                       | 0.005 ± 0.005*                    |
| 66   | Q567T7            | MAT2B        | 0.021 ± 0.0004                      | 0.014 ± 0.003*                    |
| 67   | Q8TCD5            | NT5C         | 0.028 ± 0.006                       | 0.007 ± 0.0008*                   |
| 68   | Q01995            | TAGLN        | 0.027 ± 0.010                       | 0.007 ± 0.006*                    |
| 69   | P50995            | ANXA11       | 0.038 ± 0.006                       | 0.022 ± 0.004*                    |

<sup>a</sup> reported by Ma et al. (2007): Proteomic analysis of human ovaries from normal and polycystic ovarian syndrome.

\*statistically significant difference between normal and PCOS group.
