# Supplementary material for: Unravelling the proteome of adult rhesus monkey ovaries
Source: Royal Society of Chemistry journal article supplement (doi:10.1039/c3mb70312f), 2013-11-25
Supplement: c3mb70312f_2.xlsx [file c3mb70312f_2.xlsx]

## Sheet: peptides
Supplementary Data 2. Peptides identified in the Rhesus ovary proteome with FDR of 1%
id	Protein group IDs	Sequence	Length	Missed cleavages	Mass	Proteins	Leading razor protein	Unique (Groups)	Unique (Proteins)	Charges	PEP	Score	Experiment R1	Experiment R2	Experiment R3	Unique Experiment R1	Unique Experiment R2	Unique Experiment R3	Intensity	Intensity R1	Intensity R2	Intensity R3
3736	4	DMGYTYLNIDDCWIGGR	17	0	2047.88	ENSMMUP00000000004	ENSMMUP00000000004	yes	yes	2	0.00021007	95.662		1			1		2864100	0	2864100	0
7863	4	FPHGIPFLADYVHSLGLK	18	0	2010.07	ENSMMUP00000000004	ENSMMUP00000000004	yes	yes	3,4	1.7546e-05	105.14	2	1	3	2	1	3	8802700	1925800	5368300	1508600
11110	4	HQDILQPVAGPGHWNDPDMLLIGNFGLSLEQSR	33	0	3653.8	ENSMMUP00000000004	ENSMMUP00000000004	yes	yes	3	2.4114e-14	84.299			1			1	1255200	0	0	1255200
21579	4	RFPHGIPFLADYVHSLGLK	19	1	2166.17	ENSMMUP00000000004	ENSMMUP00000000004	yes	yes	4	0.013582	56.851		1			1		195610	0	195610	0
23192	4	SLIEVYMR	8	0	1009.53	ENSMMUP00000000004	ENSMMUP00000000004	yes	yes	2	0.065616	61.962		1			1		800250	0	800250	0
23193	4	SLIEVYMRPLSNK	13	1	1548.83	ENSMMUP00000000004	ENSMMUP00000000004	yes	yes	2,3	0.0085075	83.087	1	1		1	1		7733800	4519400	3214400	0
24879	4	TISAQNMDILQNPLMIK	17	0	1929.01	ENSMMUP00000000004	ENSMMUP00000000004	yes	yes	2	1.8073e-11	166.04		1	1		1	1	27626000	0	14759000	12868000
27822	4	VVQDAQTFAEWK	12	0	1420.7	ENSMMUP00000000004	ENSMMUP00000000004	yes	yes	2	0.036241	86.288			1			1	7686700	0	0	7686700
5252	6	EGIYLENLEPEYEYK	15	0	1887.88	ENSMMUP00000000013;ENSMMUP00000000011	ENSMMUP00000000013	yes	no	2	2.8456e-10	161.82	3	2	1	3	2	1	54317000	29853000	14536000	9928700
5973	6	ELVSLIQVLK	10	0	1140.71	ENSMMUP00000000013;ENSMMUP00000000011	ENSMMUP00000000013	yes	no	2	5.0142e-65	232.79	4	4	4	4	4	4	63688000	22506000	28213000	12969000
6744	6	EVTHIQFTSWPDHGVPEDPHLLLK	24	0	2794.41	ENSMMUP00000000013;ENSMMUP00000000011	ENSMMUP00000000013	yes	no	2,3,4	4.8229e-22	136.46	3	2	3	3	2	3	191220000	88086000	22925000	80211000
15337	6	LFLAEFQSIPR	11	0	1319.72	ENSMMUP00000000013;ENSMMUP00000000011	ENSMMUP00000000013	yes	no	2	4.2186e-08	151.26	2	5	2	2	5	2	54136000	13069000	28737000	12330000
22037	6	RSCNLDEQQELVER	14	1	1774.83	ENSMMUP00000000013;ENSMMUP00000000011	ENSMMUP00000000013	yes	no	2	0.09487	49.298		1			1		1106200	0	1106200	0
25675	6	TVYQYQYTNWSVEQLPAEPK	20	0	2443.17	ENSMMUP00000000013;ENSMMUP00000000011	ENSMMUP00000000013	yes	no	2	3.4051e-32	186.15	2		1	2		1	7028100	5180100	0	1848000
29591	6	YVDILPYDYNR	11	0	1429.69	ENSMMUP00000000013;ENSMMUP00000000011	ENSMMUP00000000013	yes	no	2	0.007178	77.64	5	4	2	5	4	2	74517000	34289000	32790000	7438100
886	7	AHIVFDFHQAADGIQEQQR	19	0	2209.07	ENSMMUP00000000021	ENSMMUP00000000021	yes	yes	2,3,4	3.0675e-31	186.72	5	5	4	5	5	4	254780000	80207000	95798000	78773000
3030	7	DGVYFLYEALHGPPK	15	0	1704.85	ENSMMUP00000000021	ENSMMUP00000000021	yes	yes	2,3	1.1276e-05	141.54	3	3	4	3	3	4	52410000	16163000	10490000	25757000
3031	7	DGVYFLYEALHGPPKK	16	1	1832.95	ENSMMUP00000000021	ENSMMUP00000000021	yes	yes	2,3,4	5.6067e-07	151.72	8	6	5	8	6	5	87561000	41719000	26997000	18846000
5894	7	ELPVNAQNYVR	11	0	1301.67	ENSMMUP00000000021	ENSMMUP00000000021	yes	yes	2	0.0080092	103.26			1			1	0	0	0	0
7418	7	FIEDELQIPVK	11	0	1329.72	ENSMMUP00000000021	ENSMMUP00000000021	yes	yes	2	2.4745e-18	174.77	2	2	1	2	2	1	29710000	8958400	13526000	7226100
14875	7	LDILDMFTEIK	11	0	1336.69	ENSMMUP00000000021	ENSMMUP00000000021	yes	yes	2	6.1898e-60	217.14	3	3	4	3	3	4	79746000	18056000	33458000	28232000
18167	7	MCDLVSDFDGFSER	14	0	1676.68	ENSMMUP00000000021	ENSMMUP00000000021	yes	yes	2	1.5841e-08	150.26	3	2	2	3	2	2	17262000	7732100	6741100	2788500
22980	7	SIYPTLEIDIEGELQK	16	0	1846.96	ENSMMUP00000000021	ENSMMUP00000000021	yes	yes	2	0.0088657	62.861			1			1	1433900	0	0	1433900
25047	7	TLPGWNTDISNAR	13	0	1443.71	ENSMMUP00000000021	ENSMMUP00000000021	yes	yes	2	0.017118	63.76	1	1	1	1	1	1	12246000	2684800	4596200	4964600
26412	7	VGIGAFPTEQENEIGELLQTR	21	0	2300.16	ENSMMUP00000000021	ENSMMUP00000000021	yes	yes	2,3	1.0775e-37	181.64	3	2	4	3	2	4	66376000	22372000	21745000	22258000
2718	8	DETFSSYYGEDDYPIVR	17	0	2054.87	ENSMMUP00000000024	ENSMMUP00000000024	yes	yes	2	3.7122e-11	162.79	4	4	4	4	4	4	114160000	31369000	43634000	39159000
8214	8	FTVATFALLDSGSQR	15	0	1611.83	ENSMMUP00000000024	ENSMMUP00000000024	yes	yes	3	0.061339	88.092	1			1			1117500	1117500	0	0
9699	8	GMQLLVFPR	9	0	1059.59	ENSMMUP00000000024	ENSMMUP00000000024	yes	yes	2	9.2003e-08	160.88	5	5	2	5	5	2	46234000	25123000	13288000	7823100
11467	8	IAKDETFSSYYGEDDYPIVR	20	1	2367.09	ENSMMUP00000000024	ENSMMUP00000000024	yes	yes	2,3	1.3613e-13	154.19	4	7	4	4	7	4	255010000	80385000	119940000	54693000
17147	8	LQPDPGLPGLR	11	0	1161.65	ENSMMUP00000000024	ENSMMUP00000000024	yes	yes	2	0.029437	59.542	1		1	1		1	3784200	2019400	0	1764800
25348	8	TQMVALDGATPFQSHYQR	18	0	2048.97	ENSMMUP00000000024	ENSMMUP00000000024	yes	yes	2,3	9.5907e-07	133.71	5	6	6	5	6	6	121280000	41327000	44968000	34982000
26317	8	VFMEAVLPDGR	11	0	1232.62	ENSMMUP00000000024	ENSMMUP00000000024	yes	yes	2	0.0092638	73.848	1	1		1	1		10727000	3942000	6785200	0
561	11	AFEHLQQLELIKPMER	16	1	1981.05	ENSMMUP00000000057	ENSMMUP00000000057	yes	yes	3,4	0.0098156	74.789			2			2	7594400	0	0	7594400
10930	11	HLNDIYEEEPFNFQMVYNEFQK	22	0	2833.27	ENSMMUP00000000057	ENSMMUP00000000057	yes	yes	3	1.4791e-24	147.25		1	1		1	1	2166600	0	1112800	1053700
14878	11	LDILELLEK	9	0	1084.64	ENSMMUP00000000057;ENSMMUP00000038391	ENSMMUP00000000057	yes	no	2	0.00015993	142	1	3	2	1	3	2	3111900	702570	823880	1585500
22143	12	RYEYDHWDAAIHGFR	15	1	1934.88	ENSMMUP00000000071	ENSMMUP00000000071	yes	yes	3	0.0049237	73.887	1			1			92145	92145	0	0
28650	12	YDFSHEILRDEESFFGER	18	1	2275.02	ENSMMUP00000000071	ENSMMUP00000000071	yes	yes	3,4	8.1955e-05	103.39	2	1	1	2	1	1	4758900	2022000	2046300	690580
28769	12	YEYDHWDAAIHGFR	14	0	1778.78	ENSMMUP00000000071	ENSMMUP00000000071	yes	yes	3	0.0012814	83.204			1			1	343640	0	0	343640
14320	13	KTPQGPPEIYSDTQFPSLQSTAK	23	1	2519.25	ENSMMUP00000000075	ENSMMUP00000000075	yes	yes	3	3.6922e-19	139.02	3	3	3	3	3	3	61680000	15065000	31075000	15540000
24368	13	TALVQAPPAPVIVTETPEPAMTSGVYRPPGAR	32	1	3272.72	ENSMMUP00000000075	ENSMMUP00000000075	yes	yes	3	0.020898	40.625			1			1	6738100	0	0	6738100
166	15	AAPSVTLFPPSSEELQANK	19	0	1985.01	ENSMMUP00000026448;ENSMMUP00000026449;ENSMMUP00000026450;ENSMMUP00000000085;ENSMMUP00000026447	ENSMMUP00000026448	yes	no	2,3	1.9561e-09	130.01	10	12	10	10	12	10	2501100000	632640000	987950000	880540000
2040	15	ATLVCLISDFYPGAVEVAWK	20	0	2238.14	ENSMMUP00000026448;ENSMMUP00000026449;ENSMMUP00000026450;ENSMMUP00000000085;ENSMMUP00000026447	ENSMMUP00000026448	yes	no	2,3	6.0998e-53	202.96	3	3	4	3	3	4	31499000	7654000	18172000	5672900
22248	17	SAMPIEVMMNETAQQNMENHPVIR	24	0	2769.27	ENSMMUP00000000092	ENSMMUP00000000092	yes	yes	3	0.000498	64.83			1			1	2198600	0	0	2198600
22948	17	SISFHPSGDFILVGTQHPTLR	21	0	2308.2	ENSMMUP00000000092	ENSMMUP00000000092	yes	yes	3,4	1.5396e-05	100.97	2	2	1	2	2	1	55901000	30198000	20065000	5636800
25114	17	TLYDHVDEVTCLAFHPTEQILASGSR	26	0	2958.42	ENSMMUP00000000092	ENSMMUP00000000092	yes	yes	3,4	2.8788e-17	119.87	1	2	2	1	2	2	35310000	4813000	15649000	14847000
2568	18	DAVIEFLLDK	10	0	1161.63	ENSMMUP00000000097;ENSMMUP00000038153;ENSMMUP00000000098;ENSMMUP00000000099	ENSMMUP00000000097	yes	no	2	0.012438	75.819			1			1	314320	0	0	314320
26002	18	VDKDAELVAQWNYCTLSQEILR	22	1	2650.31	ENSMMUP00000000097;ENSMMUP00000038153;ENSMMUP00000000098;ENSMMUP00000000099	ENSMMUP00000000097	yes	no	3	4.1679e-18	145.02	1	1	1	1	1	1	15299000	5417200	4503200	5378200
203	19	AATIVATSEGSLWGLDR	17	0	1745.89	ENSMMUP00000000105;ENSMMUP00000000106	ENSMMUP00000000105	yes	no	2	6.3264e-86	238.32	3	3	4	3	3	4	115610000	29406000	47789000	38418000
281	19	ADEHVIDQGDDGDNFYVIER	20	0	2306.01	ENSMMUP00000000105;ENSMMUP00000000106	ENSMMUP00000000105	yes	no	2,3	5.218e-18	158.58	6	7	9	6	7	9	393230000	182320000	131720000	79187000
14045	19	KMFESFIESVPLLK	14	1	1666.9	ENSMMUP00000000105;ENSMMUP00000000106	ENSMMUP00000000105	yes	no	2,3	1.1295e-06	136.39	4	7	3	4	7	3	37972000	12106000	17407000	8459100
16273	19	LLGPCMDIMK	10	0	1176.57	ENSMMUP00000000105;ENSMMUP00000000106	ENSMMUP00000000105	yes	no	2	7.5063e-05	129.38	2	2	1	2	2	1	17238000	7824700	8280100	1132700
18353	19	MFESFIESVPLLK	13	0	1538.81	ENSMMUP00000000105;ENSMMUP00000000106	ENSMMUP00000000105	yes	no	2,3	5.2583e-34	202.03	5	7	6	5	7	6	165820000	41565000	54192000	70061000
18361	19	MFGSSMDLGNLGQ	13	0	1355.59	ENSMMUP00000000105;ENSMMUP00000000106	ENSMMUP00000000105	yes	no	2	3.4982e-42	209.19	1	1	1	1	1	1	13120000	3501600	5913300	3704700
19597	19	NLDQEQLSQVLDAMFER	17	0	2034.97	ENSMMUP00000000105;ENSMMUP00000000106	ENSMMUP00000000105	yes	no	2,3	8.3056e-169	287.01	8	13	9	8	13	9	918340000	225610000	380240000	312480000
21236	19	QQPPDLVEFAVDYFTR	16	0	1923.94	ENSMMUP00000000105;ENSMMUP00000000106	ENSMMUP00000000105	yes	no	2,3	2.8578e-120	264.92	8	9	3	8	9	3	90717000	41247000	32149000	17321000
22815	19	SHIQIPPGLTELLQGYTVEVLR	22	0	2462.35	ENSMMUP00000000105;ENSMMUP00000000106	ENSMMUP00000000105	yes	no	2,3	1.2941e-30	166.21	11	16	12	11	16	12	457540000	145280000	181650000	130610000
1103	21	ALAELLGPYGMK	12	0	1261.67	ENSMMUP00000000146;ENSMMUP00000000144	ENSMMUP00000000146	yes	no	2	2.2786e-05	127.87	1	3	3	1	3	3	20608000	2952200	12080000	5575500
18346	21	MFAMTLEEPTMLR	13	0	1568.74	ENSMMUP00000000146;ENSMMUP00000000144	ENSMMUP00000000146	yes	no	2	0.010503	90.731	1	1		1	1		3446600	3446600	0	0
23458	21	SNFSKPDLMASLLPQLTGAENVLK	24	1	2572.36	ENSMMUP00000000146;ENSMMUP00000000144	ENSMMUP00000000146	yes	no	3	2.757e-06	85.881		1	2		1	2	27254000	0	10186000	17068000
8668	22	GDQMVVLEESGEWWK	15	0	1791.81	ENSMMUP00000000156	ENSMMUP00000000156	yes	yes	2	0.00065537	87.088	1			1			3333800	3333800	0	0
15835	22	LIDFSAQIAEGMAFIEQR	18	0	2038.02	ENSMMUP00000000156	ENSMMUP00000000156	yes	yes	3	0.019631	89.358			1			1	354970	0	0	354970
23965	22	STFSTLQELVDHYK	14	0	1666.82	ENSMMUP00000000156	ENSMMUP00000000156	yes	yes	2,3	1.5841e-08	150.26	1	2	2	1	2	2	12840000	3704800	2564600	6570800
23966	22	STFSTLQELVDHYKK	15	1	1794.92	ENSMMUP00000000156	ENSMMUP00000000156	yes	yes	3,4	0.0020391	80.318	2	2	1	2	2	1	16879000	4172400	11987000	719490
9475	23	GLEWVGLIR	9	0	1041.6	ENSMMUP00000000159	ENSMMUP00000000159	yes	yes	2	1.7567e-09	164.96	6	6	4	6	6	4	118580000	45708000	37657000	35211000
18105	24	MAEPLQPDPGAAEDAAAQAVETPGWK	26	0	2649.24	ENSMMUP00000000160	ENSMMUP00000000160	yes	yes	3	0.13033	30.976			1			1	609980	0	0	609980
27993	24	VYYTAGYNSPFK	12	0	1408.67	ENSMMUP00000000160	ENSMMUP00000000160	yes	yes	2	8.5435e-06	133.32	1	1	1	1	1	1	12746000	2676100	1897700	8172300
28518	24	WVSTSVESMDWDSAIQTGFTR	21	0	2402.08	ENSMMUP00000000160	ENSMMUP00000000160	yes	yes	2	1.5375e-05	98.543	1	1		1	1		5634800	1943900	3690900	0
4460	25	DYADSIHAIFVETSAK	16	0	1765.85	ENSMMUP00000000168	ENSMMUP00000000168	yes	yes	2,3	3.4269e-07	151.9	1	1	1	1	1	1	6880900	2763900	1874700	2242300
10001	25	GSAAAIIVYDITKEETFSTLK	21	1	2256.19	ENSMMUP00000000168	ENSMMUP00000000168	yes	yes	2,3	1.769e-07	123.4	2	1	2	2	1	2	25506000	8991000	6483300	10032000
1519	26	ANELLLSTGMPGSFLIR	17	0	1817.97	ENSMMUP00000032212;ENSMMUP00000032211;ENSMMUP00000000171	ENSMMUP00000032212	yes	no	2	0.0075221	62.203		1			1		1427400	0	1427400	0
25405	26	TSDTIAPWFHGILTLK	16	0	1798.96	ENSMMUP00000032212;ENSMMUP00000032211;ENSMMUP00000000171	ENSMMUP00000032212	yes	no	3	3.103e-05	136.24	2		1	2		1	3880000	2700800	0	1179200
26322	27	VFNPYTEFPEFSR	13	0	1631.76	ENSMMUP00000000174	ENSMMUP00000000174	yes	yes	2	8.0947e-06	129.54	3	1	1	3	1	1	11340000	6052600	3163700	2123500
413	29	AEEEGYFEAFKNELEAFK	18	1	2149.98	ENSMMUP00000039189;ENSMMUP00000000189	ENSMMUP00000039189	yes	no	2,3	2.6165e-06	135.27	1	3	3	1	3	3	27299000	1589400	20192000	5518100
1055	29	AKAEEEGYFEAFKNELEAFK	20	2	2349.12	ENSMMUP00000039189;ENSMMUP00000000189	ENSMMUP00000039189	yes	no	3,4	7.417e-10	136.34	3	2	4	3	2	4	36653000	8128900	22919000	5604400
18325	29	MEQPWPPPGPWSLPR	15	0	1773.87	ENSMMUP00000039189;ENSMMUP00000000189	ENSMMUP00000039189	yes	no	2	6.8669e-05	122.33		1	1		1	1	2853200	0	1645100	1208100
2321	30	AYEDQTKPVLEYYQK	15	1	1873.91	ENSMMUP00000000191	ENSMMUP00000000191	yes	yes	2,3	9.3893e-22	188.39	9	9	8	9	9	8	194620000	147650000	31969000	15005000
13218	30	IWPYVYAFLQTK	12	0	1527.81	ENSMMUP00000000191	ENSMMUP00000000191	yes	yes	3	0.0024782	86.014		1			1		158650	0	158650	0
19764	30	NLTQYSWLLDGFPR	14	0	1708.86	ENSMMUP00000000191	ENSMMUP00000000191	yes	yes	2,3	1.1296e-137	271.64	13	12	8	13	12	8	322670000	117790000	127690000	77192000
25597	30	TVGIDDLTGEPLIQR	15	0	1625.86	ENSMMUP00000000191	ENSMMUP00000000191	yes	yes	2	2.075e-05	136.6	2	2	2	2	2	2	77819000	22265000	34036000	21518000
27957	30	VYNIEFNPPK	10	0	1219.62	ENSMMUP00000000191	ENSMMUP00000000191	yes	yes	2	5.6772e-06	146.11	2	2	1	2	2	1	20413000	5767200	9484600	5161200
502	31	AEPWGPSASTNQTNPWGR	18	0	1954.89	ENSMMUP00000000195;ENSMMUP00000000194;ENSMMUP00000035118;ENSMMUP00000035122	ENSMMUP00000000195	yes	no	2	0.0010576	75.548			1			1	2230700	0	0	2230700
741	31	AGGSPASYHGSTSPR	15	0	1430.65	ENSMMUP00000000195	ENSMMUP00000000195	yes	yes	2	0.055186	47.774		2			2		285130	0	285130	0
5351	31	EHGSLPQQTTLLDLMDALPSSGLPAQK	27	0	2846.45	ENSMMUP00000000195;ENSMMUP00000000194;ENSMMUP00000035118;ENSMMUP00000035122	ENSMMUP00000000195	yes	no	3	3.0823e-12	99.078	2	1	1	2	1	1	16659000	4851900	6212300	5595300
6107	31	ENIFAIQTLK	10	0	1175.65	ENSMMUP00000000195;ENSMMUP00000000194;ENSMMUP00000035118	ENSMMUP00000000195	yes	no	2	0.010566	77.744	2	1		2	1		2831600	2134700	696890	0
1552	32	ANPTQLNTVEFLWDPAK	17	0	1942.98	ENSMMUP00000000210;ENSMMUP00000039661;ENSMMUP00000000211;ENSMMUP00000039660	ENSMMUP00000000210	yes	no	2	7.2386e-05	105.99		1			1		1831100	0	1831100	0
12289	32	ILDIDIPMSVGIIDPR	16	0	1765.96	ENSMMUP00000000210;ENSMMUP00000039661;ENSMMUP00000000211;ENSMMUP00000039660	ENSMMUP00000000210	yes	no	2,3	1.9423e-10	161.82	3	1	3	3	1	3	8907000	3157400	2149400	3600200
15408	32	LFTNFSGADLLK	12	0	1324.7	ENSMMUP00000000210;ENSMMUP00000039661;ENSMMUP00000000211	ENSMMUP00000000210	yes	no	2	3.428e-14	162.49	2	2	1	2	2	1	9812300	5062600	3920000	829760
48	33	AAELIANSLATAGDGLIELR	20	0	1997.08	ENSMMUP00000000214	ENSMMUP00000000214	yes	yes	2,3	9.056e-119	257.2	6	6	4	6	6	4	124130000	40027000	60032000	24068000
199	33	AATFGLILDDVSLTHLTFGK	20	0	2118.14	ENSMMUP00000000214	ENSMMUP00000000214	yes	yes	2,3	2.2322e-24	175.21	6	2	3	6	2	3	30252000	16941000	6868200	6442600
7006	33	FDAGELITQR	10	0	1148.58	ENSMMUP00000000214	ENSMMUP00000000214	yes	yes	2	6.3288e-05	131.83	1	1	2	1	1	2	19240000	5939900	11159000	2140800
7297	33	FGLALAVAGGVVNSALYNVDAGHR	24	0	2370.24	ENSMMUP00000000214	ENSMMUP00000000214	yes	yes	3	0.030305	42.172			1			1	240600	0	0	240600
10314	33	GVQDIVVGEGTHFLIPWVQK	20	0	2221.19	ENSMMUP00000000214;ENSMMUP00000010119	ENSMMUP00000000214	yes	no	2,3	6.893e-14	150.23	2	4	4	2	4	4	104400000	21277000	27020000	56100000
11895	33	IFTSIGEDYDER	12	0	1443.65	ENSMMUP00000000214	ENSMMUP00000000214	yes	yes	2	3.3255e-14	162.68	2	2	2	2	2	2	52504000	13411000	18614000	20479000
12341	33	ILFRPVASQLPR	12	1	1395.84	ENSMMUP00000000214	ENSMMUP00000000214	yes	yes	2,3	0.00027593	122.69	7	6	6	7	6	6	429950000	279950000	60015000	89979000
13883	33	KLEAAEDIAYQLSR	14	1	1605.84	ENSMMUP00000000214	ENSMMUP00000000214	yes	yes	2,3	3.0328e-52	218.78	11	11	8	11	11	8	666820000	323380000	225560000	117880000
19533	33	NITYLPAGQSVLLQLPQ	17	0	1854.03	ENSMMUP00000000214	ENSMMUP00000000214	yes	yes	2,3	3.2035e-05	112.96	3	5	2	3	5	2	79332000	31041000	35300000	12991000
26934	33	VLPSITTEILK	11	0	1212.73	ENSMMUP00000000214	ENSMMUP00000000214	yes	yes	2	0.00051894	110.38	2	2	2	2	2	2	132300000	51438000	49218000	31644000
1984	34	ATEDGEEDEEMIESIENLEDLK	22	0	2537.09	ENSMMUP00000000221	ENSMMUP00000000221	yes	yes	2,3	5.566e-09	121.47		1	1		1	1	1302700	0	743480	559200
1985	34	ATEDGEEDEEMIESIENLEDLKGHSVR	27	1	3073.37	ENSMMUP00000000221	ENSMMUP00000000221	yes	yes	4	0.0067696	53.342		1			1		8509500	0	8509500	0
3817	34	DNNELLLFILK	11	0	1330.75	ENSMMUP00000000221	ENSMMUP00000000221	yes	yes	2	3.6975e-18	172.11	1		1	1		1	2407000	1104800	0	1302200
8331	34	FVVGSHVR	8	0	899.498	ENSMMUP00000000221	ENSMMUP00000000221	yes	yes	2	0.015824	81.784			1			1	150470	0	0	150470
12878	34	ISHLPLVEELR	11	0	1304.75	ENSMMUP00000000221	ENSMMUP00000000221	yes	yes	3	0.0013721	99.568	4	1	3	4	1	3	15964000	11010000	1678000	3275700
15134	34	LEIHHR	6	0	803.44	ENSMMUP00000000221	ENSMMUP00000000221	yes	yes	2	0.039124	69.39	1			1			585530	585530	0	0
21023	34	QINIHNLSAFYDSELFR	17	0	2066.02	ENSMMUP00000000221	ENSMMUP00000000221	yes	yes	2,3	3.9673e-05	111.64	1	2	2	1	2	2	27140000	5366000	17996000	3778000
25432	34	TSIHEAMEQQSISISK	16	0	1787.87	ENSMMUP00000000221	ENSMMUP00000000221	yes	yes	3	0.020567	55.975	1			1			162080	162080	0	0
5875	36	ELPEVTNSVFHEINMWVSQR	20	0	2414.17	ENSMMUP00000000231	ENSMMUP00000000231	yes	yes	2,3,4	2.8292e-44	202.16	17	17	18	17	17	18	329320000	86779000	129820000	112720000
17650	36	LTVPFLLLQGSADR	14	0	1528.86	ENSMMUP00000000231	ENSMMUP00000000231	yes	yes	2,3	7.9817e-23	188.48	11	9	10	11	9	10	511160000	158260000	201190000	151710000
19561	36	NKTEVDIYNSDPLICR	16	1	1935.94	ENSMMUP00000000231	ENSMMUP00000000231	yes	yes	2	5.5153e-10	163.91		2	1		2	1	10709000	0	6539800	4169600
22077	36	RTPQSIPYQDLPHLVNADGQYLFCR	25	1	2987.47	ENSMMUP00000000231	ENSMMUP00000000231	yes	yes	3,4	1.6247e-10	98.121	2	3	1	2	3	1	40414000	18884000	18339000	3191400
25284	36	TPQSIPYQDLPHLVNADGQYLFCR	24	0	2831.37	ENSMMUP00000000231	ENSMMUP00000000231	yes	yes	2,3,4	9.0117e-17	133.98	8	8	8	8	8	8	781770000	245690000	277280000	258800000
25912	36	VCFGIQLLNAVSR	13	0	1475.79	ENSMMUP00000000231	ENSMMUP00000000231	yes	yes	2	1.2966e-10	149.69	1	1	2	1	1	2	8185600	2914100	1866800	3404700
26908	36	VLNLVLPNLSLGPIDSSVLSR	21	0	2205.27	ENSMMUP00000000231	ENSMMUP00000000231	yes	yes	2,3	2.0737e-106	245.1	8	10	9	8	10	9	170490000	36574000	79497000	54419000
16580	38	LMFWDLGGQEELQSLWDK	18	0	2194.04	ENSMMUP00000000238;ENSMMUP00000000240	ENSMMUP00000000238	yes	no	2	2.5339e-110	256.96	1	1	2	1	1	2	10467000	2565400	4556500	3345200
19031	38	MYTLLSGLYK	10	0	1187.63	ENSMMUP00000000238	ENSMMUP00000000238	yes	yes	2	1.6351e-20	182.64	4	3	2	4	3	2	6823600	2574200	2310100	1939400
9994	39	GRPPPTPLFGDDDDDDDIDWLG	22	1	2427.05	ENSMMUP00000000244	ENSMMUP00000000244	yes	yes	2	9.4135e-06	100.21	2	3	3	2	3	3	13194000	1963500	6639400	4591100
11171	39	HSAGNSMLIPSMSVTMETSMIMSNIQR	27	0	2952.36	ENSMMUP00000000244	ENSMMUP00000000244	yes	yes	3	0.13294	20.24			1			1	0	0	0	0
12504	39	IMNQVFQSLR	10	0	1234.65	ENSMMUP00000000244	ENSMMUP00000000244	yes	yes	2	9.7031e-10	164.33	1	1	2	1	1	2	6215300	1280300	2035700	2899300
14725	39	LASLFGLDQAAAGHGNEFFQYTAPK	25	0	2652.3	ENSMMUP00000000244	ENSMMUP00000000244	yes	yes	3	0.00011101	71.527	3	2	4	3	2	4	84661000	22690000	22013000	39959000
24854	39	TILGTIMNTIK	11	0	1203.69	ENSMMUP00000000244	ENSMMUP00000000244	yes	yes	2	9.0122e-05	130.01	4	3	2	4	3	2	18453000	11516000	5143400	1794100
27544	39	VSTDQAAAEQLSLVQAELQTQWEAK	25	0	2743.37	ENSMMUP00000000244	ENSMMUP00000000244	yes	yes	3	2.4402e-35	147.11		1			1		2079800	0	2079800	0
27685	39	VTSLEEELTDLR	12	0	1403.71	ENSMMUP00000000244	ENSMMUP00000000244	yes	yes	2	0.0017923	89.629			1			1	3426500	0	0	3426500
3390	40	DLDIFDR	7	0	892.429	ENSMMUP00000000258	ENSMMUP00000000258	yes	yes	2	0.0060377	103.92	2	1	3	2	1	3	2365000	1504100	860860	0
17464	40	LSVQGEVSTFTGK	13	0	1351.7	ENSMMUP00000000258	ENSMMUP00000000258	yes	yes	2	0.0012798	90.444		1	1		1	1	11816000	0	6438300	5377900
17988	40	LYIEFVK	7	0	910.516	ENSMMUP00000000258	ENSMMUP00000000258	yes	yes	2	0.0083364	97.602	4	2	3	4	2	3	14797000	7642000	3667900	3486700
23492	40	SNPEDQILYQTER	13	0	1591.75	ENSMMUP00000000258	ENSMMUP00000000258	yes	yes	2	1.4984e-07	142.1	1	1	1	1	1	1	14217000	2212800	5832600	6171500
29259	40	YNEETFGYEVPIKEEGDYVLVLK	23	1	2733.34	ENSMMUP00000000258	ENSMMUP00000000258	yes	yes	2,3	2.3143e-08	113.54	4	3	4	4	3	4	348170000	124340000	106360000	117480000
138	41	AALSEMVEYITHNR	14	0	1632.79	ENSMMUP00000006479;ENSMMUP00000000262	ENSMMUP00000006479	yes	no	2,3	4.3194e-05	117.03	4		2	4		2	27469000	19695000	0	7774100
1441	41	ALYYWNNEYIMSLISDNAAK	20	0	2378.13	ENSMMUP00000006479;ENSMMUP00000000262	ENSMMUP00000006479	yes	no	2,3	1.3487e-13	153.36		2			2		1504100	0	1504100	0
4153	41	DSTLTEPVVMALLK	14	0	1515.82	ENSMMUP00000006479;ENSMMUP00000000262;ENSMMUP00000008080	ENSMMUP00000006479	yes	no	2	0.017602	61.423		1	1		1	1	5200800	0	2895900	2304900
7576	41	FLESPDFQPNIAK	13	0	1504.76	ENSMMUP00000006479;ENSMMUP00000000262;ENSMMUP00000008080	ENSMMUP00000006479	yes	no	2	1.1234e-14	166.7	1	1		1	1		15324000	6145600	9178100	0
21433	41	RAALSEMVEYITHNR	15	1	1788.89	ENSMMUP00000006479;ENSMMUP00000000262	ENSMMUP00000006479	yes	no	3	0.00022702	101.42	2	1		2	1		1954700	1399700	555040	0
1725	43	AQFFVEDASTASALK	15	0	1583.78	ENSMMUP00000000265	ENSMMUP00000000265	yes	yes	2	4.9054e-15	169.37	1	1	1	1	1	1	8415200	3813800	3263200	1338200
2298	43	AWLLSMIQSK	10	0	1175.64	ENSMMUP00000000265	ENSMMUP00000000265	yes	yes	2	9.7031e-10	164.33	2	2	2	2	2	2	8992500	5755000	1919000	1318400
12122	43	IIEENIPELLSLNLSNNR	18	0	2080.12	ENSMMUP00000000265	ENSMMUP00000000265	yes	yes	2	2.5761e-06	124.08		1	1		1	1	5259700	0	2808900	2450900
15068	43	LEELWLDGNSLCDTFR	16	0	1966.91	ENSMMUP00000000265	ENSMMUP00000000265	yes	yes	2	0.001256	80.361	1			1			1184400	1184400	0	0
16753	43	LNVVAFLNELPK	12	0	1355.78	ENSMMUP00000000265	ENSMMUP00000000265	yes	yes	2	6.2826e-36	196.38	3	3	4	3	3	4	78452000	23376000	24240000	30836000
778	45	AGMAAIADPHSLLDPNAMYQELQK	24	0	2583.25	ENSMMUP00000000272	ENSMMUP00000000272	yes	yes	3	3.631e-47	177	2	4	2	2	4	2	85780000	20020000	42283000	23478000
7000	45	FCSGDLGPEGILPDTHLLDPLLK	23	0	2506.28	ENSMMUP00000000272;ENSMMUP00000000271	ENSMMUP00000000272	yes	no	3	4.6346e-27	156.13	4	3	3	4	3	3	161090000	50264000	76935000	33892000
20954	45	QGHYLPLNEVVYTR	14	0	1687.87	ENSMMUP00000000272	ENSMMUP00000000272	yes	yes	2,3	0.0084987	68.034	1	1		1	1		16789000	12555000	4234100	0
21330	45	QTSDQLFFLDLK	12	0	1453.75	ENSMMUP00000000272	ENSMMUP00000000272	yes	yes	2	0.00029794	111.12	3	2	4	3	2	4	25293000	6269300	7154700	11869000
28431	45	WRGENVSTTEVEGVLSR	17	1	1917.95	ENSMMUP00000000272	ENSMMUP00000000272	yes	yes	2,3	7.1007e-05	135.09	1	1	2	1	1	2	11809000	2538900	3995100	5274600
156	46	AAPAPGLISVFSSPQELGASLAQLVAQR	28	0	2777.51	ENSMMUP00000000273	ENSMMUP00000000273	yes	yes	3	0.00010833	66.853	1	1		1	1		2362800	360040	2002800	0
5864	46	ELPAAVAPAGPVSLAR	16	0	1517.86	ENSMMUP00000000273	ENSMMUP00000000273	yes	yes	2	0.00042359	91.207	1	1		1	1		35468000	15556000	19912000	0
6932	46	FALGLSGGSLVSMLAR	16	0	1577.86	ENSMMUP00000000273	ENSMMUP00000000273	yes	yes	2	4.7322e-05	132.44	1	1	1	1	1	1	4188500	1295100	1724000	1169400
12315	46	ILEDQEENPVPAALVQPHTGK	21	0	2284.17	ENSMMUP00000000273	ENSMMUP00000000273	yes	yes	3	6.9405e-06	109.28		1			1		18610000	0	18610000	0
14796	46	LCWFLDEAAAR	11	0	1350.64	ENSMMUP00000000273	ENSMMUP00000000273	yes	yes	2	0.0029274	107.06		1	2		1	2	14760000	0	6630200	8130300
16864	46	LPIPESQVITINPELPVEEAAEDYAK	26	0	2864.47	ENSMMUP00000000273	ENSMMUP00000000273	yes	yes	3	9.8208e-22	130.3	2	2	1	2	2	1	47698000	17217000	22919000	7561500
17780	46	LVPFDHAESTYGLYR	15	0	1766.86	ENSMMUP00000000273	ENSMMUP00000000273	yes	yes	2,3	5.8967e-05	110.98	3	3	2	3	3	2	69004000	28704000	29476000	10824000
28479	46	WTLGFCDER	9	0	1182.51	ENSMMUP00000000273	ENSMMUP00000000273	yes	yes	2	0.013958	77.677		1			1		1626300	0	1626300	0
4287	47	DVEREGLDWDLIYVGR	16	1	1933.95	ENSMMUP00000000278;ENSMMUP00000031757	ENSMMUP00000000278	yes	no	2,3	2.061e-06	148.72	1	2		1	2		5374100	2562700	2811400	0
5032	47	EEYGFLPVPLR	11	0	1318.69	ENSMMUP00000000278	ENSMMUP00000000278	yes	yes	2	4.4549e-18	170.47	3	5	6	3	5	6	56407000	9041300	23067000	24299000
5255	47	EGLDWDLIYVGR	12	0	1434.71	ENSMMUP00000000278;ENSMMUP00000031757	ENSMMUP00000000278	yes	no	2	4.9093e-10	155.48	1	1	2	1	1	2	98092000	17728000	29498000	50867000
8777	47	GELGCFLSHYNIWK	14	0	1722.82	ENSMMUP00000000278;ENSMMUP00000031757	ENSMMUP00000000278	yes	no	2,3	3.7931e-07	141.54	4	2	8	4	2	8	61926000	17156000	29087000	15682000
18600	47	MLPVDEFLPVMFDK	14	0	1679.83	ENSMMUP00000000278	ENSMMUP00000000278	yes	yes	2,3	1.9204e-11	162.48	5	7	6	5	7	6	138920000	26172000	42209000	70544000
18601	47	MLPVDEFLPVMFDKHPVSEYK	21	1	2520.24	ENSMMUP00000000278	ENSMMUP00000000278	yes	yes	2,3,4	4.8696e-05	105.5	3	10	6	3	10	6	179460000	16198000	147280000	15980000
19648	47	NLHAFSVEPLLIYPTHYTGDDGYVSDTETSVVWNNEHVK	39	0	4446.11	ENSMMUP00000000278	ENSMMUP00000000278	yes	yes	4,5	0.001133	38.81	2	2	2	2	2	2	155320000	61832000	55784000	37699000
20061	47	NSDVLQSPLDSAARDEL	17	1	1828.88	ENSMMUP00000000278	ENSMMUP00000000278	yes	yes	2	6.4569e-07	149.86		1	1		1	1	25183000	0	14729000	10454000
25663	47	TVVAPMLDSR	10	0	1087.57	ENSMMUP00000000278	ENSMMUP00000000278	yes	yes	2	0.076261	52.49		1			1		1452600	0	1452600	0
603	49	AFLEENNLDYIIR	13	0	1608.81	ENSMMUP00000000309;ENSMMUP00000000308	ENSMMUP00000000309	yes	no	2	1.2092e-19	179.67	2	3	2	2	3	2	106120000	20858000	48736000	36521000
8419	49	FYSQAIELNPSNAIYYGNR	19	0	2219.06	ENSMMUP00000000309;ENSMMUP00000000308	ENSMMUP00000000309	yes	no	2,3	2.2705e-52	209.45	3	4	3	3	4	3	33563000	11108000	15496000	6958300
9733	49	GNHETDNMNQIYGFEGEVK	19	0	2180.94	ENSMMUP00000000309;ENSMMUP00000000308;ENSMMUP00000031561	ENSMMUP00000000309	yes	no	2,3	1.7324e-13	156.15	3	2	2	3	2	2	107810000	39619000	25563000	42626000
16552	49	LLYPDHFHLLR	11	0	1422.78	ENSMMUP00000000309;ENSMMUP00000000308;ENSMMUP00000031561	ENSMMUP00000000309	yes	no	2,3,4	4.9302e-08	150.1	3	3	5	3	3	5	24225000	7300000	3548700	13376000
26858	49	VLIMHGGLFSEDGVTLDDIR	20	0	2186.1	ENSMMUP00000000309;ENSMMUP00000000308;ENSMMUP00000031561	ENSMMUP00000000309	yes	no	3	0.011955	52.814		1			1		3347200	0	3347200	0
14791	50	LCPLKDEPWPIHPWEPGSFR	20	1	2460.2	ENSMMUP00000000312	ENSMMUP00000000312	yes	yes	3,4	1.1744e-06	120.63	1	2	2	1	2	2	25548000	2947800	20357000	2243900
22762	50	SGTWWDEHLSEENVPFIK	18	0	2173.01	ENSMMUP00000000312	ENSMMUP00000000312	yes	yes	3	0.0075672	58.814	1	1	1	1	1	1	80633000	26638000	26546000	27449000
12894	51	ISLEVQLEQLRPFSHL	16	1	1908.05	ENSMMUP00000000315;ENSMMUP00000000316;ENSMMUP00000033149	ENSMMUP00000000315	yes	no	3	0.013583	70.438			1			1	1354000	0	0	1354000
16861	51	LPILELSHIWELSDFDK	17	0	2054.07	ENSMMUP00000000315;ENSMMUP00000000316	ENSMMUP00000000315	yes	no	3	2.4141e-05	132.81	1	1	1	1	1	1	4659600	1016200	1589000	2054400
310	52	ADIFVDPVLHTACALDIK	18	0	1997.03	ENSMMUP00000000318	ENSMMUP00000000318	yes	yes	3	9.2473e-05	92.063		1	1		1	1	11656000	0	7365300	4291200
16204	52	LLELQYFISR	10	0	1280.71	ENSMMUP00000000318	ENSMMUP00000000318	yes	yes	2	8.264e-21	183.99	1	2	2	1	2	2	39529000	5353600	17812000	16363000
17070	52	LQETEMMDPELDYTLMR	17	0	2113.94	ENSMMUP00000000318	ENSMMUP00000000318	no	no	2,3	5.5983e-56	221.13	6	5	5				85849000	23774000	34204000	27870000
17474	52	LSYLLMCLESAVHR	14	0	1690.85	ENSMMUP00000000318	ENSMMUP00000000318	yes	yes	3	9.8557e-05	111.12	1	1	1	1	1	1	2527600	788770	1256400	482470
18589	52	MLMEDFSLSPEIILSCR	17	0	2039.97	ENSMMUP00000000318	ENSMMUP00000000318	yes	yes	2,3	0.0046533	66.826	1	1		1	1		4065700	3063100	1002500	0
18877	52	MTAIIFSDYR	10	0	1215.6	ENSMMUP00000000318	ENSMMUP00000000318	yes	yes	2	0.00076227	103.34	1	2	1	1	2	1	17211000	3758200	12270000	1183000
22656	52	SGDPMILSCLMEHLYTEK	18	0	2122.97	ENSMMUP00000000318	ENSMMUP00000000318	yes	yes	2,3	4.0857e-13	159.19	2	2	4	2	2	4	57434000	7758900	6641700	43034000
25782	52	VAELSSDDFHLDR	13	0	1502.7	ENSMMUP00000000318	ENSMMUP00000000318	yes	yes	3	0.00039316	105.65	3	1	3	3	1	3	58065000	27736000	4641900	25687000
25855	52	VAPADGFSDLAMQVMTSPSK	20	0	2050.97	ENSMMUP00000000318	ENSMMUP00000000318	yes	yes	2	1.9171e-05	108.18		1	1		1	1	9515600	0	5016800	4498900
551	53	AFDLVPPEAVPEQK	14	0	1538.8	ENSMMUP00000000326	ENSMMUP00000000326	yes	yes	2	0.0011454	84.892	1	1	1	1	1	1	25089000	6492200	10694000	7902800
552	53	AFDLVPPEAVPEQKDPDPEFPTVK	24	1	2664.33	ENSMMUP00000000326	ENSMMUP00000000326	yes	yes	3,4	3.8568e-05	80.142	2	4	3	2	4	3	281710000	48236000	153890000	79585000
3025	53	DGVSAAVISAELASFLATK	19	0	1848.98	ENSMMUP00000000326	ENSMMUP00000000326	yes	yes	2,3	8.1808e-116	250.27	12	9	14	12	9	14	262180000	61876000	109820000	90481000
5209	53	EGFHFEETLTGFK	13	0	1540.72	ENSMMUP00000000326	ENSMMUP00000000326	yes	yes	2,3	3.9115e-06	133.05	3	6	4	3	6	4	320950000	146810000	95650000	78494000
8277	53	FVHTSVHGVGHNFVQSAFK	19	0	2097.05	ENSMMUP00000000326	ENSMMUP00000000326	yes	yes	2,3,4,5	1.3971e-116	256.08	6	4	7	6	4	7	246520000	96110000	83688000	66725000
8504	53	GALKDTYMLSSTVSSK	16	1	1686.85	ENSMMUP00000000326	ENSMMUP00000000326	yes	yes	2,3	2.8263e-30	195.38	5	3	2	5	3	2	14436000	12610000	956900	869640
9344	53	GIVISFDAR	9	0	976.534	ENSMMUP00000000326	ENSMMUP00000000326	yes	yes	2	0.013672	86.67	2	1	1	2	1	1	4168600	2095500	1282400	790720
10289	53	GVLTLSFALADK	12	0	1233.7	ENSMMUP00000000326	ENSMMUP00000000326	yes	yes	2	5.2452e-07	142.97	2	3	2	2	3	2	4719600	1034400	2675300	1009800
13153	53	IVLANDPDADRLAVAEK	17	1	1808.96	ENSMMUP00000000326	ENSMMUP00000000326	yes	yes	2,3	0.00016731	123.08	3			3			8271200	8271200	0	0
18669	53	MNDLTIIQTTQGFCR	15	0	1796.85	ENSMMUP00000000326	ENSMMUP00000000326	yes	yes	2	0.032914	87.447	2	1		2	1		0	0	0	0
19314	53	NFLTLEAVK	9	0	1033.58	ENSMMUP00000000326	ENSMMUP00000000326	yes	yes	2	0.0019755	107.21			1			1	1055200	0	0	1055200
27986	53	VYWDNGAQIISPHDK	15	0	1741.84	ENSMMUP00000000326	ENSMMUP00000000326	yes	yes	2,3	9.1841e-139	273.99	9	10	10	9	10	10	872880000	401370000	146950000	324560000
28052	53	WDKNFLTLEAVK	12	1	1462.78	ENSMMUP00000000326	ENSMMUP00000000326	yes	yes	2,3	2.0533e-05	134.61	3	2	3	3	2	3	175630000	78900000	52299000	44435000
28053	53	WDKNFLTLEAVKR	13	2	1618.88	ENSMMUP00000000326	ENSMMUP00000000326	yes	yes	2,3,4	3.0071e-18	179.67	5	4	1	5	4	1	93148000	53073000	31757000	8317900
29359	53	YPNPEEGKGVLTLSFALADK	20	1	2148.11	ENSMMUP00000000326	ENSMMUP00000000326	yes	yes	3	1.1527e-05	113.33	3	2		3	2		22344000	11965000	10379000	0
4952	56	EEIAFLK	7	0	848.464	ENSMMUP00000000338;ENSMMUP00000000337;ENSMMUP00000000340	ENSMMUP00000000338	yes	no	1,2	2.1603e-20	111.69	1	1		1	1		12972000	4464100	8507700	0
11390	56	HYLHLR	6	0	837.461	ENSMMUP00000000338;ENSMMUP00000000337;ENSMMUP00000037992	ENSMMUP00000000338	yes	no	2	0.093276	47.044			1			1	125790	0	0	125790
28620	56	YAVQVLLNVSK	11	0	1232.71	ENSMMUP00000000338;ENSMMUP00000000337;ENSMMUP00000000340;ENSMMUP00000037992	ENSMMUP00000000338	yes	no	2	0.15982	65.395		1			1		2735000	0	2735000	0
7704	57	FLVNSFLK	8	0	966.554	ENSMMUP00000031646;ENSMMUP00000000343	ENSMMUP00000031646	yes	no	2	0.0005774	133.86	3	2	4	3	2	4	6200600	1563800	2399300	2237500
9062	57	GGGGGGGGGGGLGGGLGNVLGGLISGAGGGGGGGGGGGGGGGGGGTAMR	49	0	3466.61	ENSMMUP00000031646;ENSMMUP00000000343	ENSMMUP00000031646	yes	no	3,4	4.4014e-36	93.969	1		1	1		1	33809000	27470000	0	6338900
12350	57	ILGGVISAISEAAAQYNPEPPPPR	24	0	2446.29	ENSMMUP00000031646;ENSMMUP00000000343	ENSMMUP00000031646	yes	no	2,3,4	4.665e-79	209.85	7	9	8	7	9	8	208570000	48292000	102550000	57726000
15249	57	LFAQLAGDDMEVSATELMNILNK	23	0	2522.24	ENSMMUP00000031646;ENSMMUP00000000343	ENSMMUP00000031646	yes	no	2,3	3.6556e-69	202.39	26	31	24	26	31	24	343030000	87343000	161870000	93811000
18374	57	MFLVNSFLK	9	0	1097.59	ENSMMUP00000031646;ENSMMUP00000000343	ENSMMUP00000031646	yes	no	2	4.9733e-60	228.05	32	26	27	32	26	27	524300000	174490000	207870000	141940000
21801	57	RLFAQLAGDDMEVSATELMNILNK	24	1	2678.34	ENSMMUP00000031646;ENSMMUP00000000343	ENSMMUP00000031646	yes	no	2,3	5.9909e-46	170.14	5	3	1	5	3	1	25710000	15086000	9632500	991590
22758	57	SGTICSSELPGAFEAAGFHLNEHLYNMIIR	30	0	3333.59	ENSMMUP00000031646;ENSMMUP00000000343	ENSMMUP00000031646	yes	no	3,4	4.8651e-10	86.946	7	10	10	7	10	10	273370000	33366000	181800000	58205000
29465	57	YSDESGNMDFDNFISCLVR	19	0	2267.95	ENSMMUP00000031646;ENSMMUP00000000343	ENSMMUP00000031646	yes	no	2,3	1.2972e-40	194.05	5	6	4	5	6	4	255430000	61989000	114140000	79304000
9057	58	GGFVDNILYR	10	0	1152.59	ENSMMUP00000000344	ENSMMUP00000000344	yes	yes	2	8.9853e-05	126.31	2	3	1	2	3	1	16089000	5856000	8549700	1682900
15383	58	LFQEDNDIPLYLK	13	0	1606.82	ENSMMUP00000000344	ENSMMUP00000000344	yes	yes	2	1.7721e-32	197.36	3	3	4	3	3	4	98720000	29917000	39717000	29087000
9535	59	GLIVYQLENQPSEFR	15	0	1791.92	ENSMMUP00000000348;ENSMMUP00000000349	ENSMMUP00000000348	yes	no	2	0.0003895	90.725	1			1			6536600	6536600	0	0
19000	59	MWDLSSNQAIQIAQHDAPVK	20	0	2251.11	ENSMMUP00000000348;ENSMMUP00000000349	ENSMMUP00000000348	yes	no	3	5.9397e-05	87.088	3	3	3	3	3	3	144720000	53382000	44100000	47236000
23142	59	SLFGTTSGFGTSGTSMFGSATTDNHNPMK	29	0	2937.29	ENSMMUP00000000348;ENSMMUP00000000349	ENSMMUP00000000348	yes	no	3	0.00035292	58.015			1			1	2870400	0	0	2870400
25818	59	VAIHYINPPNPAK	13	0	1432.78	ENSMMUP00000000348;ENSMMUP00000000349	ENSMMUP00000000348	yes	no	3	0.0011052	91.937	2	1		2	1		565680	394080	171600	0
133	60	AALPFGLVR	9	0	942.565	ENSMMUP00000003384;ENSMMUP00000039850;ENSMMUP00000039853;ENSMMUP00000003383;ENSMMUP00000000351;ENSMMUP00000039844;ENSMMUP00000039845	ENSMMUP00000003384	yes	no	2	0.0081503	84.568	2	1	1	2	1	1	2730000	1780700	731100	218250
1039	60	AIVDTVDNLLRPEALESWK	19	1	2168.15	ENSMMUP00000003384;ENSMMUP00000039850;ENSMMUP00000039853;ENSMMUP00000003383;ENSMMUP00000000351;ENSMMUP00000039844;ENSMMUP00000039845;ENSMMUP00000018577	ENSMMUP00000003384	yes	no	3	0.00051595	83.54		1	2		1	2	21972000	0	6554000	15418000
16576	60	LMEQLVDILDAQLQELKPSEK	21	1	2439.29	ENSMMUP00000003384;ENSMMUP00000039850;ENSMMUP00000039853;ENSMMUP00000003383;ENSMMUP00000000351;ENSMMUP00000039844;ENSMMUP00000039845;ENSMMUP00000018577	ENSMMUP00000003384	yes	no	3	2.5892e-06	117.65	1	2		1	2		2567500	413850	2153600	0
22659	60	SGEAIINYANYHDTSPYR	18	0	2069.94	ENSMMUP00000003384;ENSMMUP00000039850;ENSMMUP00000039853;ENSMMUP00000003383;ENSMMUP00000000351;ENSMMUP00000039844;ENSMMUP00000039845;ENSMMUP00000018577	ENSMMUP00000003384	yes	no	3	0.0063264	60.918	1			1			18481000	18481000	0	0
5602	61	EKLPWTEFAESAEDGPTTR	19	1	2163.01	ENSMMUP00000000356	ENSMMUP00000000356	yes	yes	2	1.9897e-22	169.25	1	1	1	1	1	1	9189400	3009400	2513900	3666100
10939	61	HLPLPDLQEVKR	12	1	1443.82	ENSMMUP00000000356	ENSMMUP00000000356	yes	yes	3	0.018002	68.355	1			1			6631000	6631000	0	0
19410	61	NHDMVVVSPILER	13	0	1507.78	ENSMMUP00000000356	ENSMMUP00000000356	yes	yes	3	0.022317	60.401	1			1			1156400	1156400	0	0
25267	61	TPLPADAPVAEQVSALHR	18	0	1870.99	ENSMMUP00000000356	ENSMMUP00000000356	yes	yes	3	3.2424e-13	161.24	1	2	1	1	2	1	27978000	9183200	12686000	6109300
26368	61	VGDFNESTYYMEGNLGHPVFQTQFGR	26	0	2992.34	ENSMMUP00000000356	ENSMMUP00000000356	yes	yes	3	1.5093e-05	78.324	2	1	2	2	1	2	61543000	22658000	9199200	29686000
7612	62	FLILPDMLK	9	0	1088.63	ENSMMUP00000000359	ENSMMUP00000000359	yes	yes	2	0.0011898	116.05	13	11	10	13	11	10	276420000	114730000	95777000	65920000
26836	62	VLHEAEGHIVTCETNTGEVYR	21	0	2413.13	ENSMMUP00000000359	ENSMMUP00000000359	yes	yes	2,3,4	9.5774e-61	212.72	10	6	6	10	6	6	100300000	65133000	16783000	18381000
11359	64	HWLDSPWPGFFNVDGEPK	18	0	2126.99	ENSMMUP00000000377	ENSMMUP00000000377	yes	yes	3	6.6218e-05	96.096	1			1			284790	284790	0	0
15196	64	LEQISPFPFDLIK	13	0	1545.84	ENSMMUP00000000377	ENSMMUP00000000377	yes	yes	2	1.4389e-14	166.03		1	1		1	1	2383600	0	1551300	832250
6265	65	EQELFFFHDLSPGSCFFLPR	20	0	2472.16	ENSMMUP00000000380;ENSMMUP00000000381	ENSMMUP00000000380	yes	no	3	4.7119e-10	126.63	1			1			2808900	2808900	0	0
12042	65	IHGEILVTSAIVK	13	0	1378.82	ENSMMUP00000000380;ENSMMUP00000000381	ENSMMUP00000000380	yes	no	2	0.12554	41.401			1			1	43046000	0	0	43046000
16239	66	LLFDMAGVTFR	11	0	1268.66	ENSMMUP00000000386	ENSMMUP00000000386	yes	yes	2	5.3657e-26	184.88	5	5	3	5	5	3	46940000	12298000	14174000	20467000
29381	66	YPYVCHAELNAIMNK	15	0	1821.85	ENSMMUP00000000386	ENSMMUP00000000386	yes	yes	3	8.4039e-05	107.53	1	2	2	1	2	2	35766000	2326200	13004000	20436000
1157	67	ALDVNVALR	9	0	969.561	ENSMMUP00000000392	ENSMMUP00000000392	yes	yes	2	2.6817e-07	161.63	3	1	3	3	1	3	7849700	1179800	5084900	1585100
5056	67	EFEEDLTGIDDR	12	0	1437.63	ENSMMUP00000000392	ENSMMUP00000000392	yes	yes	2	2.6242e-20	169.23	6	4	4	6	4	4	138250000	42950000	67145000	28153000
5057	67	EFEEDLTGIDDRK	13	1	1565.72	ENSMMUP00000000392	ENSMMUP00000000392	yes	yes	2,3	3.4901e-24	182.1	2	1	1	2	1	1	22028000	16442000	1178900	4407700
5531	67	EIVQDGDHMIIR	12	0	1424.71	ENSMMUP00000000392	ENSMMUP00000000392	yes	yes	2,3	1.4088e-56	221.6	8	6	5	8	6	5	117820000	100370000	8814600	8634600
10395	67	GWTQWIEGDELHLEMR	16	0	1998.93	ENSMMUP00000000392	ENSMMUP00000000392	yes	yes	2,3	3.3613e-53	213.94	24	30	26	24	30	26	3028000000	444710000	2079900000	503450000
11485	67	IANLLKPDKEIVQDGDHMIIR	21	2	2417.31	ENSMMUP00000000392	ENSMMUP00000000392	yes	yes	2,3,4	7.7615e-18	156.15	6	5	3	6	5	3	934770000	312530000	414340000	207910000
18551	67	MLANENFEEYLR	12	0	1527.7	ENSMMUP00000000392	ENSMMUP00000000392	yes	yes	2	8.3179e-69	224.42	11	16	15	11	16	15	2641500000	906400000	989080000	745980000
20334	67	NYIMDFQVGK	10	0	1213.58	ENSMMUP00000000392	ENSMMUP00000000392	yes	yes	2	4.0611e-10	167.12	6	4	6	6	4	6	288990000	96106000	129720000	63170000
20335	67	NYIMDFQVGKEFEEDLTGIDDR	22	1	2633.2	ENSMMUP00000000392	ENSMMUP00000000392	yes	yes	2,3	2.5666e-55	193.27	18	19	16	18	19	16	918780000	326770000	409650000	182370000
20336	67	NYIMDFQVGKEFEEDLTGIDDRK	23	2	2761.29	ENSMMUP00000000392	ENSMMUP00000000392	yes	yes	2,3	2.7445e-82	221.81	9	7	4	9	7	4	221870000	69802000	129140000	22924000
20428	67	PDKEIVQDGDHMIIR	15	1	1764.88	ENSMMUP00000000392	ENSMMUP00000000392	yes	yes	2	0.00037274	106.19	2		1	2		1	30299000	19545000	0	10754000
20693	67	PVDFTGYWK	9	0	1111.53	ENSMMUP00000000392	ENSMMUP00000000392	yes	yes	2	3.7447e-05	153.24	11	12	11	11	12	11	1171900000	513170000	424160000	234590000
16211	68	LLEPLVTQVTTLVNTSNK	18	0	1969.11	ENSMMUP00000036414;ENSMMUP00000000397	ENSMMUP00000036414	yes	no	2,3	9.4116e-19	169.43	2	2	2	2	2	2	42063000	12704000	19487000	9872400
20541	69	PILMGHIHK	9	0	1044.59	ENSMMUP00000000400	ENSMMUP00000000400	yes	yes	2	0.0057426	88.942		1	1		1	1	18530000	0	10272000	8258100
27890	69	VWLDPNETNEIANANSR	17	0	1941.92	ENSMMUP00000000400;ENSMMUP00000033336;ENSMMUP00000032074;ENSMMUP00000000399	ENSMMUP00000000400	yes	no	2	2.0632e-07	147.64	2	2	1	2	2	1	21694000	6282000	9895800	5516200
930	70	AIALQPENPMAHFLLGR	17	0	1877	ENSMMUP00000000412;ENSMMUP00000033827	ENSMMUP00000000412	yes	no	2,3	1.0185e-07	152.94	4	4	5	4	4	5	347810000	113140000	91314000	143350000
2232	70	AVSGGAGDAAVLPSLPR	17	0	1536.83	ENSMMUP00000000412	ENSMMUP00000000412	yes	yes	2	3.1623e-05	117.2		1	1		1	1	27927000	0	20917000	7009900
5212	70	EGFQLLLNNK	10	0	1174.63	ENSMMUP00000000412;ENSMMUP00000033827	ENSMMUP00000000412	yes	no	2	0.00034839	112.71	1	1		1	1		4844100	1676000	3168100	0
9411	70	GLAGEIVGEVR	11	0	1098.6	ENSMMUP00000000412	ENSMMUP00000000412	yes	yes	2	0.00025946	118.9	1	1	1	1	1	1	9042200	1593300	3248900	4200000
14294	70	KTATALLESPLSATVEDALQSFLK	24	1	2532.37	ENSMMUP00000000412	ENSMMUP00000000412	yes	yes	3	9.451e-07	86.761	1	1		1	1		4309000	1581500	2727500	0
14640	70	LALELPDVTK	10	0	1097.63	ENSMMUP00000000412	ENSMMUP00000000412	yes	yes	2	0.0070824	84.17	2		1	2		1	1101300	0	0	1101300
14641	70	LALELPDVTKEDLALQK	17	1	1895.06	ENSMMUP00000000412	ENSMMUP00000000412	yes	yes	3	0.0099081	71.279	1	1	1	1	1	1	26951000	18442000	4593900	3915700
24384	70	TATALLESPLSATVEDALQSFLK	23	0	2404.27	ENSMMUP00000000412	ENSMMUP00000000412	yes	yes	2,3	8.5013e-39	177.08	1	1	1	1	1	1	8111800	3934300	1968100	2209400
28026	70	WCYQVSHLSWLEK	13	0	1734.82	ENSMMUP00000000412;ENSMMUP00000033827	ENSMMUP00000000412	yes	no	2,3	1.6863e-18	173.68	3	3	3	3	3	3	62737000	20635000	28213000	13889000
473	71	AELQMLLEEEIPGGR	15	0	1683.85	ENSMMUP00000000419;ENSMMUP00000000420	ENSMMUP00000000419	yes	no	2	0.00019001	103.39		1	1		1	1	2869600	0	1505600	1364000
474	71	AELQMLLEEEIPGGRR	16	1	1839.95	ENSMMUP00000000419;ENSMMUP00000000420	ENSMMUP00000000419	yes	no	2	0.0015643	88.768	1	1	1	1	1	1	2884700	885590	1321200	677900
14152	71	KPIDYTILDDIGHGVK	16	1	1782.95	ENSMMUP00000000419;ENSMMUP00000000420;ENSMMUP00000000421	ENSMMUP00000000419	yes	no	3	1.3042e-10	166.04	1	1	1	1	1	1	42141000	14683000	16094000	11364000
11833	72	IFEDHENLVENLLNWTR	17	0	2141.05	ENSMMUP00000037843;ENSMMUP00000000426;ENSMMUP00000037835;ENSMMUP00000000427;ENSMMUP00000000424	ENSMMUP00000037843	yes	no	2,3	1.8333e-32	195.77	2	3	5	2	3	5	15157000	2556400	7133800	5466500
18357	72	MFGAWLGELDK	11	0	1265.61	ENSMMUP00000037843;ENSMMUP00000000426;ENSMMUP00000037835;ENSMMUP00000000427;ENSMMUP00000000424;ENSMMUP00000037837	ENSMMUP00000037843	yes	no	2	3.4281e-08	152.54	1		1	1		1	2057200	805530	0	1251700
1824	74	ASAVSPANSPAVLLQPR	17	0	1676.92	ENSMMUP00000000430	ENSMMUP00000000430	yes	yes	2	5.9588e-05	128.59	1	1		1	1		9583300	3105600	6477800	0
3699	74	DLWYLETEKPPPPAR	15	1	1810.93	ENSMMUP00000000430;ENSMMUP00000000429	ENSMMUP00000000430	yes	no	2,3	5.8727e-15	176.89	5	6	6	5	6	6	159320000	54435000	58863000	46022000
12674	74	IPPSSAPTVLSVPAGTTIVK	20	0	1934.11	ENSMMUP00000000430;ENSMMUP00000000429	ENSMMUP00000000430	yes	no	2	3.8963e-05	90.581		1			1		15516000	0	15516000	0
15471	74	LGDLWTLDIDTLTWNKPSLSGVAPLPR	27	1	2977.59	ENSMMUP00000000430;ENSMMUP00000000429	ENSMMUP00000000430	yes	no	3	1.8018e-42	148.75	2	1	2	2	1	2	33889000	10918000	7261500	15710000
15543	74	LGHSFSLVGNK	11	0	1157.62	ENSMMUP00000000430;ENSMMUP00000000429	ENSMMUP00000000430	yes	no	3	0.022948	63.283	1			1			17940	17940	0	0
16513	74	LLVFGGMVEYGK	12	0	1311.69	ENSMMUP00000000430	ENSMMUP00000000430	yes	yes	2	0.002933	83.617	1	1	1	1	1	1	8163300	3278700	2268200	2616300
19032	74	MYVFGGWVPLVMDDVK	16	0	1854.9	ENSMMUP00000000430;ENSMMUP00000000429	ENSMMUP00000000430	yes	no	2,3	7.0308e-11	166.48	5	10	10	5	10	10	164940000	53786000	80664000	30487000
23568	74	SPISVPGGSALISNLGK	17	0	1595.89	ENSMMUP00000000430;ENSMMUP00000000429	ENSMMUP00000000430	yes	no	2	0.039883	88.311	1			1			22485000	22485000	0	0
27636	74	VTGPQATTGTPLVTMRPTSQAGK	23	1	2298.2	ENSMMUP00000000430;ENSMMUP00000000429	ENSMMUP00000000430	yes	no	3	0.0020538	64.723	1		1	1		1	5408200	3593200	0	1815000
3873	75	DPEYGEWFGYLSR	13	0	1617.71	ENSMMUP00000000431	ENSMMUP00000000431	yes	yes	2	6.1864e-07	135.81	1		1	1		1	5765300	3740600	0	2024700
7632	75	FLLLPFR	7	0	904.553	ENSMMUP00000000431	ENSMMUP00000000431	yes	yes	2	0.0060084	118.06	4	2	3	4	2	3	7601400	3486600	2580100	1534700
20921	75	QFRDPEYGEWFGYLSR	16	1	2048.94	ENSMMUP00000000431	ENSMMUP00000000431	yes	yes	3	0.00029109	124.78	1	1		1	1		1883400	608660	1274700	0
21232	75	QQNPGHALEAGWFLLR	16	0	1835.94	ENSMMUP00000000431	ENSMMUP00000000431	yes	yes	2,3	4.7322e-05	132.44	3	3	2	3	3	2	38620000	17767000	14958000	5895000
5833	77	ELLQELAEFMR	11	0	1377.7	ENSMMUP00000000435;ENSMMUP00000000436	ENSMMUP00000000435	yes	no	2,3	1.6264e-103	247.3	5	5	5	5	5	5	17668000	4178300	7626300	5863300
7441	77	FINLNGLQHEGIFR	14	0	1656.87	ENSMMUP00000000435	ENSMMUP00000000435	yes	yes	3	0.009938	66.989			1			1	1266200	0	0	1266200
2546	78	DAPGSASSELSGPSTPLHTSSPVQGK	26	0	2493.2	ENSMMUP00000000442;ENSMMUP00000000444;ENSMMUP00000000440	ENSMMUP00000000442	yes	no	3	1.436e-05	78.456	1	1		1	1		15346000	5697300	9648400	0
6514	78	ETAILDDEEQPTVGGGPHLGVYPGHRPGLSR	31	1	3253.61	ENSMMUP00000000442;ENSMMUP00000000444;ENSMMUP00000000440	ENSMMUP00000000442	yes	no	3,4	5.826e-42	131.33	1		2	1		2	41987000	7959800	0	34027000
14652	78	LALPTAALYGLR	12	0	1257.74	ENSMMUP00000000442;ENSMMUP00000000444;ENSMMUP00000000440	ENSMMUP00000000442	yes	no	2	0.00028333	111.63	2	2	2	2	2	2	12563000	5937700	4309100	2316600
22124	78	RWDLDLTYVTER	12	1	1565.78	ENSMMUP00000000442;ENSMMUP00000000444	ENSMMUP00000000442	yes	no	2,3	2.0656e-14	166.6	2	2	1	2	2	1	24777000	10914000	8847900	5015300
27329	78	VQDFGWPELHAPPLDK	16	0	1847.92	ENSMMUP00000000442;ENSMMUP00000000444	ENSMMUP00000000442	yes	no	3	0.0012183	80.534	3	3	3	3	3	3	46479000	15668000	14848000	15963000
29146	78	YLLFNLSEK	9	0	1125.61	ENSMMUP00000000442;ENSMMUP00000000444	ENSMMUP00000000442	yes	no	2	0.0015822	111.06	2	2	2	2	2	2	5721600	2584000	2333500	804100
3163	79	DILATNGVIHYIDELLIPDSAK	22	0	2409.28	ENSMMUP00000000452;ENSMMUP00000000455;ENSMMUP00000034107	ENSMMUP00000000452	yes	no	2,3	3.7252e-37	172.6	7	3	3	7	3	3	58034000	26761000	22018000	9254800
5319	79	EGVYTVFAPTNEAFR	15	0	1699.82	ENSMMUP00000000452;ENSMMUP00000000455;ENSMMUP00000034107	ENSMMUP00000000452	yes	no	2	0.00031008	91.812	4	3	4	4	3	4	231630000	79070000	83172000	69388000
8093	79	FSMLVAAIQSAGLTETLNR	19	0	2021.06	ENSMMUP00000000452;ENSMMUP00000000455;ENSMMUP00000034107	ENSMMUP00000000452	yes	no	2,3	6.6614e-14	152.89	3	3	6	3	3	6	9327200	1448700	3932200	3946300
8575	79	GCPAALPLSNLYETLGVVGSTTTQLYTDR	29	0	3096.54	ENSMMUP00000000452;ENSMMUP00000000455	ENSMMUP00000000452	yes	no	3	5.7927e-37	131.38	3	4	5	3	4	5	176650000	31971000	79264000	65419000
8595	79	GDELADSALEIFK	13	0	1406.69	ENSMMUP00000000452;ENSMMUP00000000455	ENSMMUP00000000452	yes	no	2	2.4744e-18	170.66	4	4	4	4	4	4	109760000	34146000	48299000	27313000
10742	79	HGMTLTSMYQNSDIQIHHYPNGIVTVNCAR	30	0	3456.61	ENSMMUP00000000452;ENSMMUP00000000455	ENSMMUP00000000452	yes	no	4	2.9159e-05	61.417	1		1	1		1	25177000	12103000	0	13073000
12347	79	ILGDPEALRDLLNNHILK	18	1	2043.15	ENSMMUP00000000452;ENSMMUP00000000455	ENSMMUP00000000452	yes	no	2,4	0.0056268	72.615	3	1		3	1		12194000	10818000	1376900	0
17574	79	LTLLAPLNSVFK	12	0	1314.79	ENSMMUP00000000452;ENSMMUP00000000455;ENSMMUP00000034107	ENSMMUP00000000452	yes	no	2	5.5338e-36	197.07	7	7	6	7	7	6	522010000	155090000	218110000	148820000
19869	79	NNVVSVNKEPVAEPDIMATNGVVHVITNVLQPPANRPQER	40	2	4345.26	ENSMMUP00000000452;ENSMMUP00000000455	ENSMMUP00000000452	yes	no	4	0.073883	36.215		1			1		5591200	0	5591200	0
26643	79	VISTVTNNIQQIIEIEDTFETLR	23	0	2675.4	ENSMMUP00000000452;ENSMMUP00000000455	ENSMMUP00000000452	yes	no	2,3	4.9087e-83	213.5	6	5	5	6	5	5	250440000	76864000	96076000	77498000
26997	79	VLTPPMGTVMDVLK	14	0	1499.81	ENSMMUP00000000452;ENSMMUP00000000455;ENSMMUP00000034107	ENSMMUP00000000452	yes	no	2	0.00027921	101.43	1	2	1	1	2	1	117340000	25504000	60761000	31078000
28994	79	YHVGDEILVSGGIGALVR	18	0	1854	ENSMMUP00000000452;ENSMMUP00000000455;ENSMMUP00000034107	ENSMMUP00000000452	yes	no	3	3.142e-07	140.27	3		6	3		6	9711600	6037600	0	3674000
29218	79	YLYHGQTLETLGGK	14	0	1578.8	ENSMMUP00000000452;ENSMMUP00000000455;ENSMMUP00000034107	ENSMMUP00000000452	yes	no	2,3	2.6254e-09	156.81	3	1	2	3	1	2	2275600	1420800	236120	618640
13263	80	IYLPYLQNWSHPK	13	0	1657.86	ENSMMUP00000000453;ENSMMUP00000037020;ENSMMUP00000037021	ENSMMUP00000000453	yes	no	3	0.020716	61.435		1			1		1067300	0	1067300	0
20254	80	NVNVFFPHFK	10	0	1247.65	ENSMMUP00000000453;ENSMMUP00000037020	ENSMMUP00000000453	yes	no	3	0.002383	93.178	1	2	1	1	2	1	3595700	1984500	1611300	0
5466	81	EILDWEESNELQNLEKEEEDILK	23	1	2844.36	ENSMMUP00000000454;ENSMMUP00000000451	ENSMMUP00000000454	yes	no	3	3.4049e-10	124.08	2	2	2	2	2	2	84462000	33661000	26776000	24026000
9166	81	GHHTFLMEEVAQEYHVK	17	0	2053.97	ENSMMUP00000000454;ENSMMUP00000000451	ENSMMUP00000000454	yes	no	2,3,4	1.2025e-07	152	4	4	2	4	4	2	10163000	7519800	1576200	1066900
17088	81	LQGSMMDLLQGVDGIIK	17	0	1816.94	ENSMMUP00000000454	ENSMMUP00000000454	yes	yes	2,3	9.0426e-56	219.23	7	6	6	7	6	6	51352000	14150000	25886000	11316000
10094	82	GSSIEMLQDVIDVMK	15	0	1663.82	ENSMMUP00000000458;ENSMMUP00000000460;ENSMMUP00000000459	ENSMMUP00000000458	yes	no	2,3	3.4842e-31	200.97	2	2	3	2	2	3	73360000	22610000	20207000	30542000
10095	82	GSSIEMLQDVIDVMKR	16	1	1819.92	ENSMMUP00000000458;ENSMMUP00000000460;ENSMMUP00000000459	ENSMMUP00000000458	yes	no	3	0.0087953	67.275	1			1			3373500	3373500	0	0
15061	82	LEEGEVNVLDNLAAAR	16	0	1711.87	ENSMMUP00000000458;ENSMMUP00000000460;ENSMMUP00000000459	ENSMMUP00000000458	yes	no	2	0.0054281	67.415	1			1			3756900	3756900	0	0
23838	82	SSGFVFDPSVNYANVYSK	18	0	1979.93	ENSMMUP00000000458;ENSMMUP00000000460;ENSMMUP00000000459	ENSMMUP00000000458	yes	no	2	2.2444e-26	183.74	2	1	1	2	1	1	21231000	7432900	7338700	6459800
26555	82	VICWVCELSQEHQGHQTFR	19	0	2413.11	ENSMMUP00000000458;ENSMMUP00000000460;ENSMMUP00000000459	ENSMMUP00000000458	yes	no	4	0.00089243	71.08	1	1		1	1		8547200	2229200	6318000	0
11020	83	HNEFNPQHSLLVQFR	15	0	1864.93	ENSMMUP00000000461	ENSMMUP00000000461	yes	yes	3	1.9999e-10	163.99	1		2	1		2	20923000	7177600	0	13745000
11350	83	HWCSIVYYELNNR	13	0	1752.8	ENSMMUP00000000461	ENSMMUP00000000461	no	no	2,3	3.3396e-14	161.94	1	1	3				2056100	547030	678420	830610
3246	84	DIVMPTYDLTDSVLETMGR	19	0	2155.02	ENSMMUP00000000469	ENSMMUP00000000469	yes	yes	2,3	2.5998e-31	187.39	2	3	4	2	3	4	18604000	2879200	8726600	6998100
18715	84	MPDMEFFVNLGDWPLEK	17	0	2066.95	ENSMMUP00000000469	ENSMMUP00000000469	yes	yes	2	2.3176e-23	180.78		1			1		1390100	0	1390100	0
19851	84	NNLMGDDIFCYYFK	14	0	1798.77	ENSMMUP00000000469	ENSMMUP00000000469	yes	yes	2	9.5003e-23	187.97	1	1	1	1	1	1	7168500	2259200	2573600	2335700
20832	84	QDSIYYEHFYNELQPWK	17	0	2259.03	ENSMMUP00000000469	ENSMMUP00000000469	yes	yes	2,3	2.8399e-05	121.32	2		2	2		2	11663000	6086900	0	5575900
23	87	AAAVAAAGAGEPQSPDELLPK	21	0	1962.01	ENSMMUP00000000483	ENSMMUP00000000483	yes	yes	2,3	1.5188e-23	166.92	1		3	1		3	8816600	5019100	0	3797500
8583	87	GDAEKPEEELEEDDDEELDETLSER	25	1	2920.21	ENSMMUP00000000483	ENSMMUP00000000483	yes	yes	3	8.2894e-45	162.11	3	2	1	3	2	1	56248000	26120000	22102000	8026500
17896	87	LWGLTEMFPER	11	0	1377.68	ENSMMUP00000000483	ENSMMUP00000000483	yes	yes	2	3.0959e-73	226.29	10	8	7	10	8	7	252110000	103900000	71854000	76358000
18082	87	MAAAVAAAGAGEPQSPDELLPK	22	0	2093.05	ENSMMUP00000000483	ENSMMUP00000000483	yes	yes	3	0.025605	46.494		1	1		1	1	2664000	0	1455500	1208600
16843	88	LPGPPGAPGAVFVLGGEGLR	20	0	1860.03	ENSMMUP00000000486	ENSMMUP00000000486	yes	yes	2	5.8554e-07	116.29		1			1		3022800	0	3022800	0
14429	89	KVTILELFR	9	1	1117.69	ENSMMUP00000000494	ENSMMUP00000000494	yes	yes	2,3	0.0060952	93.556	2	1	2	2	1	2	5073600	3069200	563730	1440600
27647	89	VTILELFR	8	0	989.591	ENSMMUP00000000494	ENSMMUP00000000494	yes	yes	2	1.7811e-15	182.53	3	2	2	3	2	2	12477000	4782800	3392800	4301000
11447	90	IAENNDLLWMDYHQK	15	0	1888.88	ENSMMUP00000000498;ENSMMUP00000000502;ENSMMUP00000000503	ENSMMUP00000000498	yes	no	2,3	3.5678e-05	128.71	2	2	3	2	2	3	66455000	21763000	24148000	20543000
16717	90	LNQNLNDVLVSLEK	14	0	1597.87	ENSMMUP00000000498;ENSMMUP00000000502;ENSMMUP00000000503	ENSMMUP00000000498	yes	no	2	4.9781e-10	157.86		1			1		4059600	0	4059600	0
17680	90	LVDQALLTMDTYLGQFPDIK	20	0	2280.17	ENSMMUP00000000498;ENSMMUP00000000502;ENSMMUP00000000503	ENSMMUP00000000498	yes	no	2,3	1.1516e-24	177.6	3	3	3	3	3	3	73844000	18702000	22234000	32908000
26396	90	VGFYVNTFQSIAGLEENFHK	20	0	2299.13	ENSMMUP00000000498;ENSMMUP00000000502;ENSMMUP00000000503	ENSMMUP00000000498	yes	no	3	1.525e-05	109.42	1	2	1	1	2	1	81971000	18607000	34524000	28840000
2309	91	AWTWPDALNIENSDSESWTSHTVK	24	0	2773.26	ENSMMUP00000000514	ENSMMUP00000000514	yes	yes	3	0.00030592	67.396	1	1	2	1	1	2	23263000	3843800	5292000	14127000
25045	91	TLPAESGCTIEDHVIAGNVEEFR	23	0	2543.2	ENSMMUP00000000514	ENSMMUP00000000514	yes	yes	5	0.13981	29.476	1			1			1013400	1013400	0	0
549	93	AFDHVLHLHPLSR	13	0	1540.83	ENSMMUP00000000522;ENSMMUP00000039370;ENSMMUP00000000524	ENSMMUP00000000522	yes	no	2,4	0.0011423	91.62	1	2		1	2		1636700	1161300	475420	0
16538	93	LLWGLEGLPLTVSAVQGAHPVLR	23	0	2425.38	ENSMMUP00000000522;ENSMMUP00000039370	ENSMMUP00000000522	yes	no	3	0.025173	44.238		1	1		1	1	3192400	0	1896100	1296300
25594	93	TVFRPPLDIYDVLIR	15	1	1816.02	ENSMMUP00000000522;ENSMMUP00000039370	ENSMMUP00000000522	yes	no	2,3	0.00010985	132.97	5	4	4	5	4	4	17706000	4412800	8008400	5284600
7096	94	FDYAFDDSAPNEMVYR	16	0	1938.81	ENSMMUP00000000535	ENSMMUP00000000535	yes	yes	2	3.8585e-05	134.44	1	1	2	1	1	2	6176600	1814300	1229900	3132400
8457	94	GADTSSADRQTRLEGAEINK	20	2	2118.03	ENSMMUP00000000535	ENSMMUP00000000535	yes	yes	2	0.0062972	77.505		1			1		8694800	0	8694800	0
10059	94	GSLDYRPLTTADPIDEHR	18	1	2055	ENSMMUP00000000535	ENSMMUP00000000535	yes	yes	3	0.054105	56.121		1			1		4069800	0	4069800	0
11610	94	IDILTELR	8	0	971.565	ENSMMUP00000000535	ENSMMUP00000000535	yes	yes	2	0.0069679	130.96		3	2		3	2	0	0	0	0
18593	95	MLPGPLMMYQFQR	13	0	1610.78	ENSMMUP00000033948;ENSMMUP00000000564	ENSMMUP00000033948	yes	no	2,3	0.10142	30.205	3	3	1	3	3	1	35238000	11163000	15235000	8839900
24730	95	TGLIPENYVEFL	12	0	1393.71	ENSMMUP00000033948;ENSMMUP00000000564	ENSMMUP00000033948	yes	no	2	0.0010883	95.477	1	1		1	1		1177200	368810	808430	0
7824	96	FNWYVDGVEVHNAQTK	16	0	1905.9	ENSMMUP00000000566;ENSMMUP00000000565	ENSMMUP00000000566	yes	no	2,3	7.4427e-83	235.35	13	10	11	13	10	11	3259000000	819120000	1075400000	1364400000
7825	96	FNWYVDGVEVHNAQTKPR	18	1	2159.05	ENSMMUP00000000566;ENSMMUP00000000565	ENSMMUP00000000566	yes	no	2,3,4	3.3433e-150	269.92	46	28	38	46	28	38	13454000000	4850100000	2940900000	5662700000
9016	96	GFYPSDIVVEWASNGQPENTYK	22	0	2500.15	ENSMMUP00000000566;ENSMMUP00000000565	ENSMMUP00000000566	yes	no	2,3,4	1.9629e-82	221.81	30	31	33	30	31	33	9968700000	2752100000	3867300000	3349200000
23949	96	STCPPCPAELLGGPSVFLFPPK	22	0	2370.18	ENSMMUP00000000566	ENSMMUP00000000566	yes	yes	2,3	7.9459e-56	191.21	4	5	5	4	5	5	26843000	4612300	11638000	10593000
23950	96	STCPPCPAELLGGPSVFLFPPKPK	24	1	2595.32	ENSMMUP00000000566	ENSMMUP00000000566	yes	yes	2,3,4	2.662e-08	93.572	17	18	21	17	18	21	4836500000	1474500000	1786200000	1575800000
25234	96	TPEVTCVVVDVSQEEPDVK	19	0	2129.02	ENSMMUP00000000566;ENSMMUP00000000565	ENSMMUP00000000566	yes	no	2,3	2.598e-98	245.78	13	8	11	13	8	11	998800000	410920000	277940000	309940000
5467	97	EILGTAQSVGCNVDGR	16	0	1674.8	ENSMMUP00000000568;ENSMMUP00000035575;ENSMMUP00000007378;ENSMMUP00000003086;ENSMMUP00000000570;ENSMMUP00000016291;ENSMMUP00000040012;ENSMMUP00000013030	ENSMMUP00000000568	yes	no	2	0.0023417	75.376			1			1	2088900	0	0	2088900
11081	97	HPHDIIDDINSGAVECPAS	19	0	2045.91	ENSMMUP00000000568;ENSMMUP00000035575;ENSMMUP00000007378;ENSMMUP00000003086;ENSMMUP00000000570;ENSMMUP00000007377	ENSMMUP00000000568	yes	no	2,3	2.6177e-17	163.91	2	3	2	2	3	2	73249000	21423000	38949000	12877000
11184	97	HSGNITFDEIINIAR	15	0	1698.87	ENSMMUP00000000568;ENSMMUP00000003086;ENSMMUP00000000570	ENSMMUP00000000568	yes	no	2,3	1.553e-30	196.8	8	4	7	8	4	7	1063800000	432460000	313720000	317630000
20789	97	QAQIEVVPSASALIIK	16	0	1665.97	ENSMMUP00000000568;ENSMMUP00000035575;ENSMMUP00000007378;ENSMMUP00000007377;ENSMMUP00000032993;ENSMMUP00000039972;ENSMMUP00000040489;ENSMMUP00000005179	ENSMMUP00000000568	yes	no	2	5.4696e-31	196.95	2	1	3	2	1	3	179460000	35158000	75057000	69246000
1636	99	APPDGWELIEPTLDELDQK	19	0	2165.05	ENSMMUP00000000574	ENSMMUP00000000574	yes	yes	2,3	8.5176e-13	148.52		1	2		1	2	2802100	0	1674500	1127600
13356	99	KAPPDGWELIEPTLDELDQK	20	1	2293.15	ENSMMUP00000000574	ENSMMUP00000000574	yes	yes	2,3	8.3299e-05	88.283	1	1	2	1	1	2	32496000	10999000	8201700	13295000
14372	99	KVESLWPIFR	10	1	1273.72	ENSMMUP00000000574	ENSMMUP00000000574	yes	yes	2,3	5.3059e-14	170.89	4	3	2	4	3	2	27334000	9650500	10883000	6800900
26196	99	VESLWPIFR	9	0	1145.62	ENSMMUP00000000574	ENSMMUP00000000574	yes	yes	2	0.00017474	143.86	1		1	1		1	2033600	724910	0	1308700
29010	99	YIFDLFYK	8	0	1107.56	ENSMMUP00000000574	ENSMMUP00000000574	yes	yes	2	0.0052342	100.15	4	4	2	4	4	2	14825000	3893700	8656500	2275000
2359	100	AYPLGDIPEDLVPLVK	16	0	1737.96	ENSMMUP00000000575	ENSMMUP00000000575	yes	yes	2	5.0062e-05	123.76	2	2	2	2	2	2	4227100	1326500	2115000	785580
3897	100	DPLREEEVFNYIHNILSIPGHSAEEK	26	1	3035.5	ENSMMUP00000000575	ENSMMUP00000000575	yes	yes	3,4	1.9726e-10	95.996	3	2	2	3	2	2	29049000	5915100	14696000	8438600
8155	100	FSYIDLDKELEFK	13	1	1645.82	ENSMMUP00000000575	ENSMMUP00000000575	yes	yes	3	5.9989e-07	142.07	1	1	1	1	1	1	9525700	4707500	2279700	2538400
10253	100	GVFLECLEPYILSDK	15	0	1781.89	ENSMMUP00000000575	ENSMMUP00000000575	yes	yes	2	5.2829e-05	111.83			1			1	1473400	0	0	1473400
13618	100	KGDIHGAFLIMLER	14	1	1598.86	ENSMMUP00000000575	ENSMMUP00000000575	yes	yes	3	0.0018384	84.753	1			1			225070	225070	0	0
15787	100	LHSAEASPEEEIYPYIR	17	0	2002.96	ENSMMUP00000000575	ENSMMUP00000000575	yes	yes	3	0.025477	52.823			1			1	868680	0	0	868680
22959	100	SITDAHPPGTAILHIK	16	0	1669.92	ENSMMUP00000000575	ENSMMUP00000000575	yes	yes	3	0.13535	35.657	1			1			9520800	9520800	0	0
23053	100	SLATGGNVSQALALVGEK	18	0	1713.93	ENSMMUP00000000575	ENSMMUP00000000575	yes	yes	3	0.0014398	72.417		1	1		1	1	2905400	0	979760	1925700
27077	100	VMVENSDFTPSQVGCLFTFLAR	22	0	2517.2	ENSMMUP00000000575	ENSMMUP00000000575	yes	yes	3	0.11901	59.857			1			1	1732000	0	0	1732000
9398	101	GKPNWEHLNEDLHVLITVEDAQNR	24	1	2826.4	ENSMMUP00000000576;ENSMMUP00000000580;ENSMMUP00000000579	ENSMMUP00000000576	yes	no	3,4	1.4708e-06	88.755	3		1	3		1	5904800	3339700	0	2565100
18069	101	LYVPVKEYPDFNFVGR	16	1	1942	ENSMMUP00000000576;ENSMMUP00000000580;ENSMMUP00000000579	ENSMMUP00000000576	yes	no	3	0.0031282	85.909	1	1		1	1		12466000	5211900	7254300	0
22188	101	SAELPDAVGPIVQLQEK	17	0	1792.96	ENSMMUP00000000576;ENSMMUP00000000580;ENSMMUP00000000579	ENSMMUP00000000576	yes	no	2	0.0091906	59.513	1			1			3547600	3547600	0	0
9593	103	GLPPAVPDELLTLYFENR	18	0	2043.07	ENSMMUP00000000602	ENSMMUP00000000602	yes	yes	2	0.0010576	75.548	1	2	2	1	2	2	21388000	3136100	10445000	7806300
9892	103	GPWNKLEHLAESTGEFR	17	1	1969.96	ENSMMUP00000000602;ENSMMUP00000000601	ENSMMUP00000000602	yes	no	2,3	0.00042814	101.9	2	2		2	2		3249700	991830	2257900	0
14613	103	LAGQEGLAEMVLLMEPGAMR	20	0	2115.05	ENSMMUP00000000602;ENSMMUP00000000601	ENSMMUP00000000602	yes	no	2,3	2.6751e-11	137.45			3			3	8382600	0	0	8382600
21978	103	RPVEQVLYHGTTAPAVPDICAHGFNR	26	1	2904.45	ENSMMUP00000000602;ENSMMUP00000000601	ENSMMUP00000000602	yes	no	4	5.8827e-11	97.776	1	1	1	1	1	1	42476000	9102800	13634000	19739000
26729	103	VLAQADHELHGAQLSLRPAPPR	22	1	2375.28	ENSMMUP00000000602	ENSMMUP00000000602	yes	yes	3	0.034673	52.185	1			1			1984600	1984600	0	0
27476	103	VSHPLLQQQYELYR	14	0	1772.92	ENSMMUP00000000602;ENSMMUP00000000601	ENSMMUP00000000602	yes	no	2,3	1.583e-05	127.71	1	2	3	1	2	3	50862000	33777000	7316100	9769200
27760	103	VVGDGASVDLLLLELYLENERR	22	1	2472.32	ENSMMUP00000000602	ENSMMUP00000000602	yes	yes	3	0.10572	37.237	1			1			1700600	1700600	0	0
9155	104	GHFFVEDQIYCEK	13	0	1670.74	ENSMMUP00000000614	ENSMMUP00000000614	yes	yes	2,3	1.2084e-10	150.26	4	3	3	4	3	3	135160000	63138000	35062000	36962000
18681	104	MNLASEPQEVLHIGSAHNR	19	0	2102.03	ENSMMUP00000000614;ENSMMUP00000035760	ENSMMUP00000000614	yes	no	2,3,4	2.8827e-23	173.87	7	9	9	7	9	9	733150000	404250000	115810000	213090000
21293	104	QSTSFLVLQEILESEEK	17	0	1979.01	ENSMMUP00000000614;ENSMMUP00000035760	ENSMMUP00000000614	yes	no	2	7.2972e-05	105.89			1			1	3801900	0	0	3801900
21294	104	QSTSFLVLQEILESEEKGDPNKPSGFR	27	2	3034.52	ENSMMUP00000000614;ENSMMUP00000035760	ENSMMUP00000000614	yes	no	3,4	0.0042712	64.069	2		1	2		1	37639000	29601000	0	8037800
24321	104	TAASGVEANSRPLDHAQPPSSLVIDKESEVYK	32	2	3394.7	ENSMMUP00000000614;ENSMMUP00000035760	ENSMMUP00000000614	yes	no	4	4.1759e-07	77.233	1			1			32072000	32072000	0	0
27674	104	VTPPEGYEVVTVFPK	15	0	1660.87	ENSMMUP00000000614	ENSMMUP00000000614	yes	yes	2	0.023953	56.569		1			1		13094000	0	13094000	0
1017	105	AIRPPCPDTAPPSSALHWLADLATQK	26	1	2812.43	ENSMMUP00000000618;ENSMMUP00000023313	ENSMMUP00000000618	yes	no	4	0.0015995	61.361			1			1	6695800	0	0	6695800
1889	105	ASLPNFLDHIIASVVENK	18	0	1966.05	ENSMMUP00000000618;ENSMMUP00000023313	ENSMMUP00000000618	yes	no	3	1.4399e-05	106.93	2	1	2	2	1	2	4551600	1099900	1959100	1492500
1890	105	ASLPNFLDHIIASVVENKK	19	1	2094.15	ENSMMUP00000000618;ENSMMUP00000023313	ENSMMUP00000000618	yes	no	3	0.0012599	72.433	2	1		2	1		2560200	1478000	1082200	0
2892	105	DFWDGFEIICK	11	0	1428.64	ENSMMUP00000000618;ENSMMUP00000023313	ENSMMUP00000000618	yes	no	2	9.8053e-09	156.51	2	1	1	2	1	1	4314100	2105300	1419800	789050
5003	105	EEPSNPFLAFVEK	13	0	1505.74	ENSMMUP00000000618;ENSMMUP00000023313	ENSMMUP00000000618	yes	no	2	8.6784e-05	115.34		3	2		3	2	12779000	0	7297000	5481900
6066	105	EMVMGLNVLDPHTSHSWLCDGR	22	0	2553.16	ENSMMUP00000000618;ENSMMUP00000023313	ENSMMUP00000000618	yes	no	4	0.069738	36.744		1			1		1598100	0	1598100	0
7113	105	FEDLMENLPLPEYTK	15	0	1837.88	ENSMMUP00000000618;ENSMMUP00000023313	ENSMMUP00000000618	yes	no	2	0.000177	99.344		1	2		1	2	3837800	0	663220	3174500
9944	105	GQSHEPENLMPTQIIPGTALYNIGDMVHAAR	31	0	3359.64	ENSMMUP00000000618;ENSMMUP00000023313	ENSMMUP00000000618	yes	no	4	0.00030288	50.705	1	1	1	1	1	1	54951000	19822000	19207000	15922000
14380	105	KVGEEQGQENPPDHDPIHDQSWYLDQTLR	29	1	3430.58	ENSMMUP00000000618;ENSMMUP00000023313	ENSMMUP00000000618	yes	no	4	0.00017646	59.555	1	1	1	1	1	1	47701000	10999000	20077000	16624000
14409	105	KVPAESMPTLTPAFPR	16	1	1740.92	ENSMMUP00000000618;ENSMMUP00000023313	ENSMMUP00000000618	yes	no	3	0.12867	42.958		1			1		2855500	0	2855500	0
16953	105	LPSYFVRPDLGPK	13	1	1487.81	ENSMMUP00000000618;ENSMMUP00000023313	ENSMMUP00000000618	yes	no	3	0.070203	63.408		1	1		1	1	4787400	0	2589300	2198100
22470	105	SELWKPEAFSQEFGDQDVDLVNCR	24	1	2868.3	ENSMMUP00000000618;ENSMMUP00000023313	ENSMMUP00000000618	yes	no	3	1.1918e-11	120.52	1		1	1		1	9090000	4973700	0	4116300
22498	105	SETEEMGDEEVFSWLK	16	0	1914.82	ENSMMUP00000000618;ENSMMUP00000023313	ENSMMUP00000000618	yes	no	2	3.1861e-07	152.34		2	1		2	1	13195000	0	7699500	5495100
27405	105	VRDFWDGFEIICK	13	1	1683.81	ENSMMUP00000000618;ENSMMUP00000023313	ENSMMUP00000000618	yes	no	3	1.3748e-10	155.86	1	1	1	1	1	1	2484900	255360	968020	1261500
27963	105	VYQPEGEEGWLYGVVSHQDSITR	23	0	2648.25	ENSMMUP00000000618	ENSMMUP00000000618	yes	yes	3	0.0073537	50.358	1	1	1	1	1	1	30853000	8993200	11096000	10764000
5994	106	ELYLLFR	7	0	952.538	ENSMMUP00000000623;ENSMMUP00000000626;ENSMMUP00000000624;ENSMMUP00000017455	ENSMMUP00000000623	yes	no	2	0.0057905	114.19	2	1	2	2	1	2	4447800	2168100	849860	1429800
24984	106	TLFVSGLPLDIKPR	14	1	1554.91	ENSMMUP00000000623;ENSMMUP00000000626;ENSMMUP00000000624	ENSMMUP00000000623	yes	no	3	0.017753	73.466	2	1	1	2	1	1	9862500	3579500	3250900	3032100
28300	106	WLPPSEATSQGWK	13	0	1485.73	ENSMMUP00000000623	ENSMMUP00000000623	yes	yes	2	0.081495	46.88		1	1		1	1	3255400	0	836520	2418900
8683	107	GDTHPLTLDEILDETQHLDIGLK	23	0	2572.3	ENSMMUP00000000627	ENSMMUP00000000627	yes	yes	3,4	9.1932e-07	84.975	2	2	1	2	2	1	11316000	4956300	4710800	1648500
9505	107	GLGGILLEDIEEALPNSQK	19	0	1995.05	ENSMMUP00000000627	ENSMMUP00000000627	yes	yes	2,3	1.4145e-17	166.3	1	2	2	1	2	2	14271000	1084700	6664300	6521800
5757	108	ELGGLEGDPSPEEDEGIQK	19	0	1997.91	ENSMMUP00000000630	ENSMMUP00000000630	yes	yes	2	5.5344e-52	204.05	1	1		1	1		17348000	9757800	7590200	0
19442	108	NHQEEDLTEFLCANHVLK	18	0	2196.03	ENSMMUP00000000630	ENSMMUP00000000630	yes	yes	3,4	2.0238e-06	127.75	2	2	2	2	2	2	109940000	41942000	30703000	37292000
6080	109	ENALVQMADANQAQLAMNHLSGQR	24	0	2609.24	ENSMMUP00000000633;ENSMMUP00000000635	ENSMMUP00000000633	yes	no	3	1.7043e-16	132.13	1	1	1	1	1	1	9454600	4633300	3105300	1716000
19856	109	NNQFQALLQYADPVNAHYAK	20	0	2304.13	ENSMMUP00000000633;ENSMMUP00000000635	ENSMMUP00000000633	yes	no	3	4.1501e-10	127.83	2	1	2	2	1	2	99546000	33928000	15234000	50384000
7187	110	FFEHFIEGGR	10	0	1237.59	ENSMMUP00000000653	ENSMMUP00000000653	yes	yes	2,3	2.1338e-05	141.88	10	5	10	10	5	10	127150000	44076000	34385000	48690000
27954	110	VYLLYRPGHYDILYK	15	1	1912.02	ENSMMUP00000000653	ENSMMUP00000000653	yes	yes	2,3	5.4528e-08	157.86	3	3	4	3	3	4	24115000	1525100	16958000	5632600
22304	111	SCYLSSLDLLLEHR	14	0	1704.85	ENSMMUP00000000654	ENSMMUP00000000654	yes	yes	2,3	1.9593e-08	148.41	5	3	4	5	3	4	101550000	57072000	22271000	22204000
29610	111	YVIHTVGPIAYGEPSASQAAELR	23	0	2428.24	ENSMMUP00000000654	ENSMMUP00000000654	yes	yes	3	1.9261e-38	173.21	3	3	2	3	3	2	83821000	45519000	22866000	15436000
6373	112	ERNELQEAEELLSLAVR	17	1	1998.04	ENSMMUP00000000656;ENSMMUP00000000657	ENSMMUP00000000656	yes	no	3	0.00010003	132.44	2	2	2	2	2	2	4471000	1005000	2999000	467020
19238	112	NELQEAEELLSLAVR	15	0	1712.89	ENSMMUP00000000656;ENSMMUP00000000657	ENSMMUP00000000656	yes	no	3	8.6645e-16	178.23	1		1	1		1	477680	201460	0	276230
5773	113	ELGVGIALR	9	0	926.555	ENSMMUP00000000663	ENSMMUP00000000663	yes	yes	2	1.3839e-05	154.49	2	6	3	2	6	3	127340000	42979000	55358000	28998000
8857	113	GFDEYMKELGVGIALR	16	1	1796.91	ENSMMUP00000000663	ENSMMUP00000000663	yes	yes	2,3	5.83e-06	146.77	5	7	2	5	7	2	33055000	10059000	21372000	1623300
8858	113	GFDEYMKELGVGIALRK	17	2	1925.01	ENSMMUP00000000663	ENSMMUP00000000663	yes	yes	3	0.00037417	136.17	1	2		1	2		16519000	2747600	13772000	0
14326	113	KTQTVCSFTDGALVQHQEWDGK	22	1	2534.19	ENSMMUP00000000663	ENSMMUP00000000663	yes	yes	2,3,4	7.2355e-156	265.96	20	16	17	20	16	17	3928600000	1864900000	853140000	1210600000
14327	113	KTQTVCSFTDGALVQHQEWDGKESTITR	28	2	3221.54	ENSMMUP00000000663	ENSMMUP00000000663	yes	yes	3,4	7.414e-34	137.38	5	5	2	5	5	2	756000000	335990000	315420000	104590000
17683	113	LVDSKGFDEYMKELGVGIALR	21	2	2339.22	ENSMMUP00000000663	ENSMMUP00000000663	yes	yes	3,4	3.8935e-14	144.01	1	7	2	1	7	2	65019000	2153400	61905000	960610
17853	113	LVVDCVMNNVTCTR	14	0	1679.78	ENSMMUP00000000663	ENSMMUP00000000663	yes	yes	2,3	9.6171e-67	234.22	6	6	6	6	6	6	649050000	227990000	296420000	124630000
18399	113	MGAMAKPDCIITCDGK	16	1	1766.78	ENSMMUP00000000663	ENSMMUP00000000663	yes	yes	2,3	0.00029652	123.38	4	3	4	4	3	4	17221000	12330000	2105300	2786300
25368	113	TQTVCSFTDGALVQHQEWDGK	21	0	2406.09	ENSMMUP00000000663	ENSMMUP00000000663	yes	yes	2,3	7.4501e-106	242.1	12	12	15	12	12	15	2806000000	1114600000	873620000	817800000
25369	113	TQTVCSFTDGALVQHQEWDGKESTITR	27	1	3093.45	ENSMMUP00000000663	ENSMMUP00000000663	yes	yes	3,4	5.7473e-23	121.47	8	12	4	8	12	4	1517500000	727530000	713900000	76051000
25546	113	TTQFSCTLGEKFEETTADGR	20	1	2277.02	ENSMMUP00000000663	ENSMMUP00000000663	yes	yes	2,3	1.1083e-23	173.98	8	6	5	8	6	5	495710000	185860000	209530000	100320000
25547	113	TTQFSCTLGEKFEETTADGRK	21	2	2405.12	ENSMMUP00000000663	ENSMMUP00000000663	yes	yes	2,3,4	0.00019255	108.71	3	1	2	3	1	2	540280000	517280000	14465000	8540200
960	115	AIFLADGNVFTTGFSR	16	0	1714.87	ENSMMUP00000000697;ENSMMUP00000038693	ENSMMUP00000000697	yes	no	2,3	2.1982e-83	243.04	9	9	7	9	9	7	531380000	158020000	248630000	124720000
14267	115	KSDLFQDDLYPDTAGPEAALEAEEWFEGK	29	1	3270.49	ENSMMUP00000000697;ENSMMUP00000038693	ENSMMUP00000000697	yes	no	2,3,4	4.2976e-89	181.33	17	14	17	17	14	17	3346100000	962920000	1479400000	903820000
19047	115	NADPILISLK	10	0	1082.63	ENSMMUP00000000697;ENSMMUP00000038693	ENSMMUP00000000697	yes	no	2	0.00021544	118.28	1	1	1	1	1	1	21865000	9208800	10566000	2090100
19818	115	NMQEPIALHEMDTSNGVLLPFYDPDTSIIYLCGK	34	0	3880.84	ENSMMUP00000000697;ENSMMUP00000038693	ENSMMUP00000000697	yes	no	3,4	3.1144e-20	95.823	4	5	3	4	5	3	373390000	107000000	172860000	93537000
22344	115	SDLFQDDLYPDTAGPEAALEAEEWFEGK	28	0	3142.39	ENSMMUP00000000697;ENSMMUP00000038693	ENSMMUP00000000697	yes	no	3	3.1892e-35	136.71	1	1	1	1	1	1	33909000	8706200	14447000	10756000
27706	115	VTWDSSFCAVNPR	13	0	1537.7	ENSMMUP00000000697;ENSMMUP00000038693	ENSMMUP00000000697	yes	no	2	1.2585e-20	180.09	3	2	2	3	2	2	51147000	20272000	21712000	9163300
28786	115	YFEITDESPYVHYLNTFSSK	20	0	2439.13	ENSMMUP00000000697;ENSMMUP00000038693	ENSMMUP00000000697	yes	no	2,3	5.1459e-32	183.6	7	8	9	7	8	9	1738700000	601450000	493930000	643290000
3570	116	DLLSDWLDSTLGSDVTDNSIFSK	23	0	2527.2	ENSMMUP00000037746;ENSMMUP00000000698;ENSMMUP00000037745	ENSMMUP00000037746	yes	no	3	2.1308e-07	92.563	1		1	1		1	553350	475000	0	78348
3724	116	DMEALNVLPPDVLTR	15	0	1681.87	ENSMMUP00000037746;ENSMMUP00000000698;ENSMMUP00000037745	ENSMMUP00000037746	yes	no	2	0.0007737	85.469	1	2	1	1	2	1	15452000	3278300	8349500	3824300
6291	116	EQKVPEVLQLSDALRDDILPELGVR	25	2	2831.54	ENSMMUP00000037746;ENSMMUP00000000698;ENSMMUP00000037745	ENSMMUP00000037746	yes	no	4	0.016282	61.703	1	1	1	1	1	1	6243300	1315400	1982400	2945500
7645	116	FLNEFFLNVK	10	0	1269.68	ENSMMUP00000037746;ENSMMUP00000000698;ENSMMUP00000037745	ENSMMUP00000037746	yes	no	2	0.00016096	121.36	3	2	2	3	2	2	10411000	3431700	2990600	3988800
7864	116	FPHHDNELAQSEAYFENDCWVR	22	0	2763.18	ENSMMUP00000037746;ENSMMUP00000000698;ENSMMUP00000037745	ENSMMUP00000037746	yes	no	3,4	1.0574e-30	165.17	2	2	2	2	2	2	34470000	18718000	11267000	4485300
12740	116	IQHEVQLATEPLEK	14	0	1633.87	ENSMMUP00000037746;ENSMMUP00000000698;ENSMMUP00000037745	ENSMMUP00000037746	yes	no	3	8.2974e-05	112.08	1	1		1	1		370990	235310	135680	0
14595	116	LAFLMHSWK	9	0	1131.59	ENSMMUP00000037746;ENSMMUP00000000698;ENSMMUP00000037745	ENSMMUP00000037746	yes	no	3	0.013192	78.334			1			1	853650	0	0	853650
21906	116	RPEAAQLLEDVQAALKPFSVK	21	2	2309.27	ENSMMUP00000037746;ENSMMUP00000000698;ENSMMUP00000037745	ENSMMUP00000037746	yes	no	3,4	3.0036e-58	207.22	6	6	8	6	6	8	86078000	19537000	53292000	13249000
24262	116	SYISFDILR	9	0	1112.59	ENSMMUP00000037746;ENSMMUP00000000698;ENSMMUP00000037745	ENSMMUP00000037746	yes	no	2	0.0026914	101.11	1	1		1	1		6276900	3438900	2838000	0
27207	116	VPEVLQLSDALRDDILPELGVR	22	1	2446.34	ENSMMUP00000037746;ENSMMUP00000000698;ENSMMUP00000037745	ENSMMUP00000037746	yes	no	3	8.0948e-12	126.84	4	4	4	4	4	4	49398000	13443000	17745000	18211000
1743	118	AQLELYPEPLLVANAIK	17	0	1881.06	ENSMMUP00000000702	ENSMMUP00000000702	yes	yes	2	0.032717	50.053			1			1	2503900	0	0	2503900
10336	118	GVVEEWLSEFK	11	0	1321.66	ENSMMUP00000000702	ENSMMUP00000000702	yes	yes	2	1.2993e-35	196.88	3	3	3	3	3	3	44653000	23488000	12843000	8322600
26631	118	VIQEPQSELLEPVCHQLFEFYR	22	0	2760.36	ENSMMUP00000000702	ENSMMUP00000000702	yes	yes	3	0.00030938	69.148	1	2	1	1	2	1	51128000	13517000	22145000	15467000
3821	121	DNPAEYASLMEILYTLK	17	0	1969.97	ENSMMUP00000000712	ENSMMUP00000000712	yes	yes	2,3	3.4838e-56	222.3	6	7	8	6	7	8	35281000	8686500	16370000	10224000
9463	121	GLEMALLPHLHEHNLVK	17	0	1950.05	ENSMMUP00000000712	ENSMMUP00000000712	yes	yes	3,4,5	0.0013678	77.776	2	2	4	2	2	4	14276000	5970500	5034400	3270900
14821	121	LDDIPPDSLFQEDWTAFQNSIR	22	0	2606.23	ENSMMUP00000000712	ENSMMUP00000000712	yes	yes	3	0.0068249	54.117		1			1		4826700	0	4826700	0
16721	121	LNQQAHQLAFDSVFLR	16	0	1885.98	ENSMMUP00000000712	ENSMMUP00000000712	yes	yes	2,3	0.00039275	91.657		1	1		1	1	6183400	0	3431200	2752200
16828	121	LPFPPEQGDELPELDNMADNWLGSIAR	27	0	3023.43	ENSMMUP00000000712;ENSMMUP00000032544	ENSMMUP00000000712	yes	no	3	9.4116e-06	76.799	1			1			3365400	3365400	0	0
17111	121	LQLFIQEVNHAVEETSHQALQNMPK	25	0	2903.46	ENSMMUP00000000712	ENSMMUP00000000712	yes	yes	3	1.0071e-06	82.8			1			1	2889500	0	0	2889500
27615	121	VTELVDAVYDPYKPYQLK	18	1	2140.11	ENSMMUP00000000712	ENSMMUP00000000712	yes	yes	3	0.00032202	93.823	1		1	1		1	8697100	5895300	0	2801900
2471	126	DAEEVISQTIDTIVDMIK	18	0	2019.01	ENSMMUP00000000736	ENSMMUP00000000736	yes	yes	2,3	2.4519e-13	167.29	2	3		2	3		5153700	1252000	3901700	0
2698	126	DELVKFEPGQSYAGVVQYSHSQMQEHVSLR	30	1	3447.65	ENSMMUP00000000736	ENSMMUP00000000736	yes	yes	3,4	4.932e-14	94.837	3	4	2	3	4	2	298800000	131260000	137420000	30129000
4237	126	DTTPLNVLCSPGVQVVSVGIK	21	0	2182.17	ENSMMUP00000000736	ENSMMUP00000000736	yes	yes	2,3	1.8868e-19	156.92	2	3	1	2	3	1	117190000	28693000	64745000	23755000
4289	126	DVFDFVPGSDQLNVISCQGLAPSQGR	26	0	2805.34	ENSMMUP00000000736	ENSMMUP00000000736	yes	yes	2,3	6.6844e-36	148.09	5	5	6	5	5	6	948940000	234810000	450090000	264040000
6168	126	ENYAELLEDAFLK	13	0	1553.76	ENSMMUP00000000736	ENSMMUP00000000736	yes	yes	2,3	6.001e-266	328.29	23	17	19	23	17	19	6479500000	1566500000	2529700000	2383300000
7145	126	FEPGQSYAGVVQYSHSQMQEHVSLR	25	0	2863.33	ENSMMUP00000000736	ENSMMUP00000000736	yes	yes	2,3,4	1.6838e-16	115.96	17	14	18	17	14	18	10325000000	3702400000	3483800000	3139000000
9464	126	GLEQLLVGGSHLK	13	0	1349.77	ENSMMUP00000000736	ENSMMUP00000000736	yes	yes	2,3	2.0392e-07	140.31	23	21	22	23	21	22	5225800000	2659700000	1696700000	869420000
9465	126	GLEQLLVGGSHLKENK	16	1	1720.95	ENSMMUP00000000736	ENSMMUP00000000736	yes	yes	2,3,4	0.00020294	123.02	6	4	2	6	4	2	99669000	46605000	36921000	16144000
9793	126	GPEGPQGPPGHPGPPGPDECEILDIIMK	28	0	2890.36	ENSMMUP00000000736	ENSMMUP00000000736	yes	yes	3	0.12218	26.841			1			1	1381400	0	0	1381400
10894	126	HLFRVPSYQALLR	13	1	1598.9	ENSMMUP00000000736	ENSMMUP00000000736	yes	yes	3	0.0050082	90.614		1			1		1439600	0	1439600	0
11478	126	IALVITDGR	9	0	956.565	ENSMMUP00000000736	ENSMMUP00000000736	yes	yes	2	0.0013204	113.62	5	2	3	5	2	3	1715700	1288800	410910	15975
13661	126	KGLEQLLVGGSHLK	14	1	1477.86	ENSMMUP00000000736	ENSMMUP00000000736	yes	yes	2,3,4	0.00031371	105.03	3	3	1	3	3	1	26993000	13898000	10133000	2961700
16059	126	LKPYGALVDK	10	1	1102.64	ENSMMUP00000000736	ENSMMUP00000000736	yes	yes	3	0.0084876	94.692	1			1			48159	48159	0	0
16348	126	LLLFSDGNSQGATPAAIEK	19	0	1931	ENSMMUP00000000736	ENSMMUP00000000736	yes	yes	2,3	2.5558e-158	269.16	9	11	12	9	11	12	3100800000	786670000	1235800000	1078400000
19741	126	NLQWMAGGTFTGEALQYTR	19	0	2143.02	ENSMMUP00000000736	ENSMMUP00000000736	yes	yes	2,3	0	374.68	24	25	26	24	25	26	1537200000	483210000	487170000	566850000
19783	126	NLVWNAGALHYSDDVEIIQGLTR	23	0	2583.31	ENSMMUP00000000736	ENSMMUP00000000736	yes	yes	2,3,4	9.4798e-99	224.86	30	25	24	30	25	24	6417900000	2119800000	1850500000	2447600000
21822	126	RLLLFSDGNSQGATPAAIEK	20	1	2087.1	ENSMMUP00000000736	ENSMMUP00000000736	yes	yes	2,3	1.3845e-13	148.15	3	7	2	3	7	2	135920000	74939000	53836000	7145800
24333	126	TAEYDVAYGER	11	0	1272.56	ENSMMUP00000000736	ENSMMUP00000000736	yes	yes	2	0.00016512	124.12	2	1		2	1		235740	166850	68899	0
25899	126	VAVVQYSGTGQQRPER	16	1	1773.91	ENSMMUP00000000736	ENSMMUP00000000736	yes	yes	3	0.0035677	84.297	1			1			179860	179860	0	0
26341	126	VFSVAITPDHLEPR	14	0	1579.84	ENSMMUP00000000736	ENSMMUP00000000736	yes	yes	2,3	2.8241e-16	176.25	22	19	22	22	19	22	4239200000	1992800000	1444700000	801690000
27284	126	VPSYQALLR	9	0	1045.59	ENSMMUP00000000736	ENSMMUP00000000736	yes	yes	2	0.00076348	125.97	4	5	2	4	5	2	243420000	88916000	44565000	109940000
29140	126	YLIVVTDGHPLEGYK	15	0	1702.89	ENSMMUP00000000736	ENSMMUP00000000736	yes	yes	2,3	1.645e-40	203.82	13	9	15	13	9	15	313570000	127160000	94026000	92384000
29141	126	YLIVVTDGHPLEGYKEPCGGLEDAVNEAK	29	1	3172.54	ENSMMUP00000000736	ENSMMUP00000000736	yes	yes	2,3,4	4.7927e-36	126.32	16	12	11	16	12	11	3145700000	1232300000	1128000000	785340000
6001	128	EMAAMCLGLAHSLSR	15	0	1645.77	ENSMMUP00000000784	ENSMMUP00000000784	yes	yes	3	0.13386	37.613			1			1	3049300	0	0	3049300
6812	128	EWYGWHFPELGK	12	0	1547.72	ENSMMUP00000000784	ENSMMUP00000000784	yes	yes	2,3	6.6049e-45	202.65	2	4	2	2	4	2	29599000	5070500	14758000	9770500
7924	128	FQDTAEALAAFTALMEGK	18	0	1912.92	ENSMMUP00000000784	ENSMMUP00000000784	yes	yes	2,3	9.3733e-110	256.08	21	25	14	21	25	14	302420000	63315000	131590000	107520000
15816	128	LIAHAGSLLNLAK	13	0	1319.79	ENSMMUP00000000784	ENSMMUP00000000784	yes	yes	3	0.00011118	122.33	5	1	4	5	1	4	24250000	13599000	1998500	8652400
16696	128	LNLSCIHSPVVNELMR	16	0	1880.96	ENSMMUP00000000784	ENSMMUP00000000784	yes	yes	3	0.00034491	93.237	3	1	1	3	1	1	19619000	14259000	1878800	3481000
17308	128	LSELLPEEVEAEVK	14	0	1583.83	ENSMMUP00000000784	ENSMMUP00000000784	yes	yes	2	3.979e-05	118.24	2	1	1	2	1	1	51097000	13936000	23446000	13716000
18638	128	MMAIAPNVTVMVGELVGAR	19	0	1958.02	ENSMMUP00000000784	ENSMMUP00000000784	yes	yes	2,3	3.945e-23	171.56	7	5	5	7	5	5	30033000	11850000	10659000	7523700
23715	128	SQMDGLIPGVEPR	13	0	1397.7	ENSMMUP00000000784	ENSMMUP00000000784	yes	yes	2	7.2703e-05	117.2	1	1		1	1		10581000	5674800	4906600	0
25344	128	TQLYEYLQNR	10	0	1326.66	ENSMMUP00000000784	ENSMMUP00000000784	yes	yes	2	0.0010394	101.39		2			2		1033200	0	1033200	0
26709	128	VKVEEEEEEEKVAEEEETSVK	21	2	2477.15	ENSMMUP00000000784	ENSMMUP00000000784	yes	yes	3,4	4.8912e-06	117.78	5	7	4	5	7	4	56341000	24485000	17269000	14587000
28636	128	YDAFGEDSSSAMGVENR	17	0	1833.75	ENSMMUP00000000784	ENSMMUP00000000784	yes	yes	2	2.4458e-16	171.78		1			1		3164300	0	3164300	0
28914	128	YGLIYHASLVGQTSPK	16	0	1732.91	ENSMMUP00000000784	ENSMMUP00000000784	yes	yes	2,3	3.0875e-05	136.3	5	5	5	5	5	5	75402000	9688100	19167000	46547000
14343	129	KVADALTLAVGHVDDMPHALSALSDLHAHK	30	1	3131.62	ENSMMUP00000000798	ENSMMUP00000000798	yes	yes	2,3,4,5	2.298e-44	142.2	8	7	5	8	7	5	674920000	386140000	164250000	124530000
25758	129	VADALTLAVGHVDDMPHALSALSDLHAHK	29	0	3003.52	ENSMMUP00000000798	ENSMMUP00000000798	yes	yes	2,3,4	2.4241e-52	147.26	5	5	5	5	5	5	629260000	280350000	177670000	171250000
712	130	AGEVVPPAVYQFSQYVCQQTGLQIPQLPAPPK	32	0	3509.8	ENSMMUP00000000799;ENSMMUP00000031944	ENSMMUP00000000799	yes	no	3,4	7.5607e-12	87.991	1	2	4	1	2	4	43189000	4280200	17628000	21281000
4166	130	DSWNAGIMTVMSALSVAPSK	20	0	2064	ENSMMUP00000000799;ENSMMUP00000031944	ENSMMUP00000000799	yes	no	2,3	1.7399e-159	272.3	13	13	14	13	13	14	453380000	106010000	195900000	151460000
1267	131	ALLDQLMGTAR	11	0	1187.63	ENSMMUP00000000800	ENSMMUP00000000800	yes	yes	2	3.6917e-18	172.13	1	2		1	2		6526400	1743900	4782600	0
14589	131	LAETQEEISAEVSAKAEK	18	1	1931.97	ENSMMUP00000000800	ENSMMUP00000000800	yes	yes	3	0.010316	68.257		1			1		261050	0	261050	0
11190	132	HSLYMFHPTLPR	12	0	1497.76	ENSMMUP00000000806;ENSMMUP00000032823;ENSMMUP00000000805	ENSMMUP00000000806	yes	no	2,3	1.7691e-05	129.82	2	2	2	2	2	2	5487200	3785300	711640	990320
22192	132	SAFFFWGLHELGSTSETETGEAR	23	0	2558.17	ENSMMUP00000000806;ENSMMUP00000032823;ENSMMUP00000000805	ENSMMUP00000000806	yes	no	3	1.5253e-26	151.63	2	1	2	2	1	2	20203000	7779400	5324400	7099400
9658	133	GLWGGEGWILGQR	13	0	1427.73	ENSMMUP00000000820;ENSMMUP00000000821	ENSMMUP00000000820	yes	no	2	3.3803e-53	213.38	2	2	2	2	2	2	39421000	15200000	11685000	12536000
16187	133	LLEEKDPVPLFK	12	1	1426.81	ENSMMUP00000000820	ENSMMUP00000000820	yes	yes	3	0.014143	80.706	1			1			7589200	7589200	0	0
24950	133	TLDLIDEAYGFDFYILK	17	0	2035.02	ENSMMUP00000000820;ENSMMUP00000000821	ENSMMUP00000000820	yes	no	2	0.12656	36.193	1			1			6243700	6243700	0	0
29378	133	YPVWLWK	7	0	990.533	ENSMMUP00000000820;ENSMMUP00000000821	ENSMMUP00000000820	yes	no	2	0.0058342	111.69	2	1	2	2	1	2	4955300	744110	2290100	1921100
4016	135	DRDHFQLGSLSHLLNAK	17	1	1950.01	ENSMMUP00000000831	ENSMMUP00000000831	yes	yes	4	0.00014305	119.65	1	1	1	1	1	1	6527300	1449000	3991500	1086900
23114	136	SLEEIYVFSLPIK	13	0	1536.84	ENSMMUP00000000832	ENSMMUP00000000832	yes	yes	3	0.0017631	86.313			1			1	143070	0	0	143070
5164	137	EFWEIVHSFTDEQKR	15	1	1949.93	ENSMMUP00000018225;ENSMMUP00000000841	ENSMMUP00000018225	yes	no	2,3	1.0557e-52	220.97	2	1	2	2	1	2	20251000	4492700	13497000	2260800
15164	137	LEMIAMENPADLKK	14	1	1601.82	ENSMMUP00000018225;ENSMMUP00000000841	ENSMMUP00000018225	yes	no	3	6.3247e-05	118.24	1	1		1	1		10305000	7066700	3238000	0
19659	137	NLHSPEYLEMALPLFCK	17	0	2061.01	ENSMMUP00000018225;ENSMMUP00000000841	ENSMMUP00000018225	yes	no	2,3	2.7076e-05	127.32	3	1	1	3	1	1	16283000	10381000	1338200	4563900
29121	137	YLFRPEEIELLICGSR	16	1	1994.03	ENSMMUP00000018225;ENSMMUP00000000841	ENSMMUP00000018225	yes	no	3	0.00022435	117.37		1			1		288370	0	288370	0
1553	138	ANRPFLVFIR	10	1	1231.72	ENSMMUP00000000842;ENSMMUP00000000843	ENSMMUP00000000842	yes	no	2,3	2.9657e-05	138.4	12	13	9	12	13	9	643520000	224400000	223740000	195380000
3201	138	DIPMNPMCIYR	11	0	1408.63	ENSMMUP00000000842;ENSMMUP00000000843	ENSMMUP00000000842	yes	no	2	1.7363e-05	136.96	7	8	5	7	8	5	808850000	409020000	228950000	170880000
3798	138	DNIFLSPLSVSTAFAMTK	18	0	1940.99	ENSMMUP00000000842;ENSMMUP00000000843	ENSMMUP00000000842	yes	no	2,3	3.0758e-74	228.08	6	9	11	6	9	11	158890000	33413000	61896000	63576000
6310	138	EQLQDMGLVDLFSPEK	16	0	1847.9	ENSMMUP00000000842	ENSMMUP00000000842	yes	yes	2,3	3.9658e-67	224.67	21	24	23	21	24	23	4859200000	1371200000	2200600000	1287400000
6726	138	EVPLNTIIFMGR	12	0	1388.75	ENSMMUP00000000842;ENSMMUP00000000843	ENSMMUP00000000842	yes	no	2,3	4.8434e-45	205.46	15	14	14	15	14	14	3439500000	1109900000	1334500000	995090000
6972	138	FATTFYQHLADSK	13	0	1527.74	ENSMMUP00000000842;ENSMMUP00000000843	ENSMMUP00000000842	yes	no	2,3	7.0594e-118	267.21	22	19	14	22	19	14	3915200000	2034400000	758060000	1122800000
8014	138	FRIEDGFSLK	10	1	1210.63	ENSMMUP00000000842	ENSMMUP00000000842	yes	yes	2,3	7.5696e-80	243.53	24	16	13	24	16	13	1931800000	668850000	798510000	464450000
8588	138	GDDITMVLILPKPEK	15	1	1667.92	ENSMMUP00000000842	ENSMMUP00000000842	yes	yes	2,3	1.5354e-09	159.22	23	20	27	23	20	27	546090000	171670000	177900000	196520000
19160	138	NDKDNIFLSPLSVSTAFAMTK	21	1	2298.16	ENSMMUP00000000842;ENSMMUP00000000843	ENSMMUP00000000842	yes	no	2,3	9.3788e-38	189.07	24	29	25	24	29	25	7129900000	2053200000	2427700000	2649000000
21108	138	QLMEVFKFDTISEK	14	1	1713.86	ENSMMUP00000000842;ENSMMUP00000000843	ENSMMUP00000000842	yes	no	3	0.093158	58.32	1	1		1	1		12727000	7070800	5656500	0
22079	138	RVAEGTQVLELPFK	14	1	1585.88	ENSMMUP00000000842	ENSMMUP00000000842	yes	yes	2	0.00036247	103.14	2	3	2	2	3	2	70487000	31372000	23086000	16029000
25402	138	TSDQIHFFFAK	11	0	1339.66	ENSMMUP00000000842;ENSMMUP00000000843	ENSMMUP00000000842	yes	no	2,3	2.7715e-12	162.26	15	13	14	15	13	14	2643700000	539350000	824340000	1280000000
25778	138	VAEGTQVLELPFK	13	0	1429.78	ENSMMUP00000000842	ENSMMUP00000000842	yes	yes	2	1.8356e-32	197.19	4	5	5	4	5	5	586040000	137460000	209690000	238890000
25779	138	VAEGTQVLELPFKGDDITMVLILPKPEK	28	2	3079.69	ENSMMUP00000000842	ENSMMUP00000000842	yes	yes	3	1.8494e-22	117.21	11	9	1	11	9	1	181540000	100630000	79418000	1491400
3276	139	DKEETLPLEDGWWGPGTR	18	1	2084.98	ENSMMUP00000000852;ENSMMUP00000007630;ENSMMUP00000038396	ENSMMUP00000000852	yes	no	2,3	9.1191e-06	126.8		1	3		1	3	18852000	0	2436000	16416000
3277	139	DKEETLPLEDGWWGPGTRPTGR	22	2	2496.2	ENSMMUP00000000852;ENSMMUP00000007630;ENSMMUP00000038396	ENSMMUP00000000852	yes	no	3,4	4.4793e-05	103.87	3	2	1	3	2	1	109390000	54809000	38910000	15675000
4796	139	EDESIHPFKVETSDEEIHDLHQR	23	1	2789.29	ENSMMUP00000000852;ENSMMUP00000007630;ENSMMUP00000038396	ENSMMUP00000000852	yes	no	2,3,4	5.0559e-31	160.67	5	3	3	5	3	3	632640000	275830000	230530000	126280000
5019	139	EETLPLEDGWWGPGTRPTGR	20	1	2253.08	ENSMMUP00000000852;ENSMMUP00000007630;ENSMMUP00000038396	ENSMMUP00000000852	yes	no	3	0.0004774	80.411		1	1		1	1	45986000	0	19636000	26350000
6435	139	ESGYMHIQCTKPDTVGSALNDSPVGLAAYILEK	33	1	3563.73	ENSMMUP00000000852;ENSMMUP00000007630	ENSMMUP00000000852	yes	no	3,4	1.5618e-35	116.72	3	7	5	3	7	5	157900000	20096000	111520000	26290000
7690	139	FLSVLEQQ	8	0	962.507	ENSMMUP00000000852;ENSMMUP00000007630	ENSMMUP00000000852	yes	no	2	8.5893e-06	163.99	1			1			0	0	0	0
8144	139	FSTWTNTEFR	10	0	1287.59	ENSMMUP00000000852;ENSMMUP00000007630	ENSMMUP00000000852	yes	no	2	7.2059e-05	130.01	3	5	3	3	5	3	110150000	30078000	27734000	52339000
8203	139	FTPPLEDSCFHYGFNSNYLK	20	0	2435.09	ENSMMUP00000000852;ENSMMUP00000007630	ENSMMUP00000000852	yes	no	2,3	0.00055184	70.986	2	2	1	2	2	1	270180000	113900000	150400000	5876700
8392	139	FYKENLGQGWMTQK	14	1	1728.83	ENSMMUP00000000852;ENSMMUP00000007630	ENSMMUP00000000852	yes	no	3	0.002114	93.348	1			1			2074700	2074700	0	0
9069	139	GGHFAAFEEPELLAR	15	0	1642.81	ENSMMUP00000000852;ENSMMUP00000007630	ENSMMUP00000000852	yes	no	2,3	4.1352e-10	158.52	12	10	13	12	10	13	1228300000	626640000	357240000	244450000
11721	139	IEGLDIHFIHVKPPQLPAGR	20	1	2236.25	ENSMMUP00000000852;ENSMMUP00000007630	ENSMMUP00000000852	yes	no	2,3,4	2.6733e-10	135.27	5	5	3	5	5	3	296770000	138710000	63525000	94535000
12179	139	IIPLLTDPK	9	0	1008.62	ENSMMUP00000000852;ENSMMUP00000007630	ENSMMUP00000000852	yes	no	2	0.003321	96.948	1	1	1	1	1	1	10132000	4845900	3916200	1370100
19415	139	NHGLSDEHVFEVICPSIPGYGFSEASSK	28	0	3062.41	ENSMMUP00000000852;ENSMMUP00000007630	ENSMMUP00000000852	yes	no	3,4	5.1103e-29	132.26	3	4	4	3	4	4	481200000	134960000	162290000	183950000
20575	139	PLLMVHGWPGSFYEFYK	17	0	2070.01	ENSMMUP00000000852;ENSMMUP00000007630	ENSMMUP00000000852	yes	no	2,3	8.6744e-08	153.7	1	4		1	4		9377800	662340	8715400	0
24914	139	TKIEGLDIHFIHVKPPQLPAGR	22	2	2465.39	ENSMMUP00000000852;ENSMMUP00000007630	ENSMMUP00000000852	yes	no	2,3,4	1.0652e-35	171.47	4	2	5	4	2	5	195190000	52039000	108070000	35079000
25257	139	TPKPLLMVHGWPGSFYEFYK	20	1	2396.2	ENSMMUP00000000852;ENSMMUP00000007630	ENSMMUP00000000852	yes	no	2,3	0.0010582	77.221		2			2		1849500	0	1849500	0
26204	139	VETSDEEIHDLHQR	14	0	1706.79	ENSMMUP00000000852;ENSMMUP00000007630;ENSMMUP00000038396	ENSMMUP00000000852	yes	no	2	0.054605	50.562			1			1	4995700	0	0	4995700
27983	139	VYVPTGFSAFPSELIHTPEK	20	0	2218.13	ENSMMUP00000000852;ENSMMUP00000007630	ENSMMUP00000000852	yes	no	2,3	0.015777	50.053	1	3	2	1	3	2	255750000	61353000	119380000	75023000
5191	140	EGDMPIHELLSLYGYGSTVR	20	0	2236.08	ENSMMUP00000000865;ENSMMUP00000000863;ENSMMUP00000000862;ENSMMUP00000000864	ENSMMUP00000000865	yes	no	2,3	2.1405e-10	132.13	2	2	2	2	2	2	54294000	15286000	16906000	22102000
10241	140	GVEAIPEGSHIKDNEQALYELVK	23	1	2538.3	ENSMMUP00000000865;ENSMMUP00000000863;ENSMMUP00000000862;ENSMMUP00000000864	ENSMMUP00000000865	yes	no	3	0.018151	54.117			1			1	5761900	0	0	5761900
27931	140	VYENDDQLLWDPEYLPEDK	19	0	2380.07	ENSMMUP00000000865;ENSMMUP00000000863;ENSMMUP00000000862;ENSMMUP00000000864	ENSMMUP00000000865	yes	no	2	5.941e-06	109.5			1			1	1584100	0	0	1584100
29277	140	YNLHPGVTDYMDR	13	0	1579.71	ENSMMUP00000000865;ENSMMUP00000000863;ENSMMUP00000000862;ENSMMUP00000000864	ENSMMUP00000000865	yes	no	3	3.1076e-11	156.08	2		1	2		1	23374000	22542000	0	831940
12794	141	IQYQLVDISQDNALR	15	0	1774.92	ENSMMUP00000000870	ENSMMUP00000000870	yes	yes	2	3.5473e-66	226.93	2	2	2	2	2	2	58392000	20524000	17448000	20420000
12795	141	IQYQLVDISQDNALRDEMR	19	1	2306.13	ENSMMUP00000000870	ENSMMUP00000000870	yes	yes	2,3	8.6202e-07	119.92	16	14	12	16	14	12	2854900000	1183700000	995680000	675500000
21729	141	RIQYQLVDISQDNALRDEMR	20	2	2462.23	ENSMMUP00000000870	ENSMMUP00000000870	yes	yes	3,4	0.00094389	90.754	2	3		2	3		159960000	64610000	95351000	0
1864	142	ASGQAFELILSPR	13	0	1387.75	ENSMMUP00000000881	ENSMMUP00000000881	yes	yes	2	2.1748e-07	139.86	4	5	6	4	5	6	121300000	23336000	65482000	32480000
6503	142	ESVPEFPLSPPK	12	0	1325.69	ENSMMUP00000000881	ENSMMUP00000000881	yes	yes	2	0.011188	68.44		1			1		3148800	0	3148800	0
23005	142	SKESVPEFPLSPPK	14	1	1540.81	ENSMMUP00000000881	ENSMMUP00000000881	yes	yes	2,3	0.00018565	115.78	4	6	4	4	6	4	83751000	21198000	20033000	42520000
7071	143	FDQLFDDESDPFEVLK	16	0	1942.88	ENSMMUP00000000885	ENSMMUP00000000885	yes	yes	2,3	1.1385e-188	293.52	10	10	9	10	10	9	967260000	243820000	432650000	290790000
14119	143	KPANDITSQLEINFGDLGR	19	1	2087.06	ENSMMUP00000000885	ENSMMUP00000000885	yes	yes	2	9.6918e-19	168.99	5	3	5	5	3	5	90320000	31142000	24265000	34913000
23801	143	SSASAPDVDDPEAFPALA	18	0	1758.79	ENSMMUP00000000885	ENSMMUP00000000885	yes	yes	2	6.8415e-07	135.14	2	1		2	1		18551000	7455400	11096000	0
9308	144	GIQAEEILQTYLK	13	0	1504.81	ENSMMUP00000000892	ENSMMUP00000000892	no	no	2	8.8883e-05	115.06	1	1	1				4405400	2284400	1287100	833970
9355	144	GIWMWCVPHPK	11	0	1409.67	ENSMMUP00000000892	ENSMMUP00000000892	no	no	2	0.092251	46.001			1				2118900	0	0	2118900
13650	144	KGIQAEEILQTYLK	14	1	1632.91	ENSMMUP00000000892	ENSMMUP00000000892	no	no	2	2.1034e-08	151.56	1	1	1				15307000	4835500	5825100	4646000
14145	144	KPGHVLVLLDTEGLGDVEK	19	1	2018.1	ENSMMUP00000000892	ENSMMUP00000000892	yes	yes	4	0.0050834	63.681			1			1	2312400	0	0	2312400
15717	144	LHDEELDPEFVQQVADFCSYIFSNSK	26	0	3116.41	ENSMMUP00000000892;ENSMMUP00000039774	ENSMMUP00000000892	no	no	3	4.8105e-68	189.78	1	2	2				25976000	6858500	11296000	7821800
27368	144	VQLPTETLQELLDLHR	16	0	1904.04	ENSMMUP00000000892;ENSMMUP00000039774	ENSMMUP00000000892	no	no	2,3	3.4833e-07	151.8	6	5	5				311990000	96296000	87191000	128500000
4014	145	DRDEFPMILIGNK	13	1	1546.78	ENSMMUP00000000894	ENSMMUP00000000894	yes	yes	3	0.0044298	91.858	2		1	2		1	5650300	3076400	0	2574000
18702	145	MNVDQAFHELVR	12	0	1457.71	ENSMMUP00000000894	ENSMMUP00000000894	yes	yes	2,3	0.00012475	119.39	3	2	2	3	2	2	58015000	24365000	18531000	15120000
26668	145	VKDRDEFPMILIGNK	15	2	1773.94	ENSMMUP00000000894	ENSMMUP00000000894	yes	yes	2,3,4	1.5641e-05	147.18	2	2	3	2	2	3	42476000	12253000	13277000	16947000
12232	146	IKEDILACSAAELNYGLAQFVR	22	1	2480.27	ENSMMUP00000000899;ENSMMUP00000040989;ENSMMUP00000040990	ENSMMUP00000000899	yes	no	3	5.3676e-08	116.39	2	1	1	2	1	1	6994700	3271400	2413800	1309400
18138	146	MANVLDEPGQDLEADFPK	18	0	1987.92	ENSMMUP00000000899;ENSMMUP00000040989;ENSMMUP00000040990	ENSMMUP00000000899	yes	no	2	5.2344e-05	98.227			1			1	3784400	0	0	3784400
19923	146	NPLDINPSVDFLFDCGLVGPEDVSTEQDLPR	31	0	3457.63	ENSMMUP00000000899;ENSMMUP00000040989;ENSMMUP00000040990	ENSMMUP00000000899	yes	no	4	0.13652	20.759	1			1			7606900	7606900	0	0
22296	146	SCIAESPLWYSVIPMDR	17	0	2022.95	ENSMMUP00000000899;ENSMMUP00000040989;ENSMMUP00000040990	ENSMMUP00000000899	yes	no	2	3.5656e-05	112.34		1	1		1	1	4971000	0	2737600	2233400
23327	146	SLSTWQPTLLPNNTVFSR	18	0	2060.07	ENSMMUP00000000899;ENSMMUP00000040989;ENSMMUP00000040990	ENSMMUP00000000899	yes	no	2	0.15464	49.537			1			1	2608500	0	0	2608500
15381	147	LFPYLDPFDSASELMEPGR	19	0	2183.02	ENSMMUP00000000902	ENSMMUP00000000902	yes	yes	2,3	3.7523e-23	171.98	1	1	3	1	1	3	14780000	1953100	4813000	8014200
17946	147	LYDFNSYWR	9	0	1262.57	ENSMMUP00000000902;ENSMMUP00000000904;ENSMMUP00000000903;ENSMMUP00000000906	ENSMMUP00000000902	yes	no	2	6.4752e-08	163.32	1	1	1	1	1	1	7562300	4872500	1950800	739010
23634	148	SPVGEQPILNEHTFCAGMSK	20	0	2201.02	ENSMMUP00000000905	ENSMMUP00000000905	yes	yes	2,3	1.1643e-41	194.77	5	5	5	5	5	5	611670000	157290000	262250000	192130000
20192	149	NTWYAAGILSFDK	13	0	1484.73	ENSMMUP00000000907	ENSMMUP00000000907	yes	yes	2	7.7223e-42	204.35	8	7	8	8	7	8	677940000	312670000	301010000	64253000
29394	149	YQEDTCYGDAGSAFAVHDLEK	21	0	2375	ENSMMUP00000000907	ENSMMUP00000000907	yes	yes	2,3	1.0152e-29	174.22	5	5	5	5	5	5	463460000	178460000	175920000	109080000
16616	150	LMVEFPLDPALSK	13	0	1458.78	ENSMMUP00000000912	ENSMMUP00000000912	yes	yes	2	0.0010011	93.766	1			1			940500	940500	0	0
20659	150	PSLLGLDLLASLK	13	0	1338.81	ENSMMUP00000000912	ENSMMUP00000000912	yes	yes	2	3.8122e-08	145.81	1	1		1	1		3851400	1777500	2073900	0
20753	150	QADRDWYMMDEGYDEFHNPLAYSSEDYVR	29	1	3601.48	ENSMMUP00000000912	ENSMMUP00000000912	yes	yes	4	0.0011783	57.21			1			1	2118700	0	0	2118700
23278	150	SLNTDVLFGLLR	12	0	1346.76	ENSMMUP00000000912	ENSMMUP00000000912	yes	yes	2	2.7419e-69	231.67	2	2	1	2	2	1	28256000	9287700	10918000	8050200
24651	150	TFPVDILFSK	10	0	1165.64	ENSMMUP00000000912	ENSMMUP00000000912	yes	yes	2	0.017098	71.03	1	1	1	1	1	1	2934500	1480400	500070	954030
26522	150	VHLMVHNLVPPFLDGR	16	0	1842.99	ENSMMUP00000000912	ENSMMUP00000000912	yes	yes	4	0.0018191	77.776	1		1	1		1	1573800	1147300	0	426500
1363	151	ALSDSSTEFMHQIIDQVLQGGPGK	24	0	2557.25	ENSMMUP00000000917;ENSMMUP00000032602	ENSMMUP00000000917	yes	no	3	2.1365e-12	121.82	1	1		1	1		16751000	9268500	7482200	0
7846	151	FPELEAEDVFDSDK	14	0	1639.73	ENSMMUP00000000917;ENSMMUP00000032602	ENSMMUP00000000917	yes	no	2	0.086422	45.28			1			1	1479000	0	0	1479000
2221	152	AVQLYQQTANVFENEER	17	0	2037.98	ENSMMUP00000000918;ENSMMUP00000041326	ENSMMUP00000000918	yes	no	2	1.5484e-23	184.22	1	2	2	1	2	2	32348000	6181300	15286000	10880000
2352	152	AYLFQLLK	8	0	994.585	ENSMMUP00000000918	ENSMMUP00000000918	yes	yes	2	0.0021166	113.7		1			1		2508000	0	2508000	0
15605	152	LGLSLVVPGGGIK	13	0	1208.75	ENSMMUP00000000918;ENSMMUP00000041326	ENSMMUP00000000918	yes	no	2	0.00041502	105.03	1	1	2	1	1	2	9350100	2956700	1717800	4675700
9334	153	GITTFIVDRDTPGLHIGKPENK	22	2	2407.29	ENSMMUP00000000920	ENSMMUP00000000920	yes	yes	2,3	8.1897e-17	140.63	1	1	1	1	1	1	62335000	5518600	33923000	22894000
12013	153	IGTIYEGASNIQLNTIAK	18	0	1905.02	ENSMMUP00000000920	ENSMMUP00000000920	yes	yes	2	1.9725e-59	214.28	1	1	1	1	1	1	57407000	16730000	22970000	17708000
15255	153	LFDFQGLQHQVAHMATQLEAAR	22	0	2510.25	ENSMMUP00000000920	ENSMMUP00000000920	yes	yes	2,3,4	1.6648e-68	210.43	21	24	24	21	24	24	606300000	115450000	398970000	91877000
21802	153	RLFDFQGLQHQVAHMATQLEAAR	23	1	2666.35	ENSMMUP00000000920	ENSMMUP00000000920	yes	yes	3,4,5	5.6121e-08	110.67	3	1	2	3	1	2	7598400	3891500	2396300	1310700
6118	154	ENLDVFCEAWESQISDMSTLLR	22	0	2642.2	ENSMMUP00000000931;ENSMMUP00000039639;ENSMMUP00000000932	ENSMMUP00000000931	yes	no	3	2.616e-06	98.543		1			1		1915100	0	1915100	0
17131	154	LQMENNGWISVTNK	14	0	1632.79	ENSMMUP00000000931;ENSMMUP00000039639;ENSMMUP00000000932	ENSMMUP00000000931	yes	no	2	0.11034	42.317	1			1			325400	325400	0	0
24072	154	SVEQTLLPLVSQITTLINHK	20	0	2233.27	ENSMMUP00000000931;ENSMMUP00000039639;ENSMMUP00000000932;ENSMMUP00000039638	ENSMMUP00000000931	yes	no	3	4.6203e-05	89.344	3	4	3	3	4	3	43130000	12729000	21708000	8693400
25473	154	TSQDLIHQLEVFAAEGLK	18	0	1998.04	ENSMMUP00000000931;ENSMMUP00000039639;ENSMMUP00000000932	ENSMMUP00000000931	yes	no	2,3	1.6664e-20	179.95	4	5	5	4	5	5	27237000	11828000	6961700	8447600
4580	155	EAEHHCLLHSPIPVNCPIR	19	0	2278.11	ENSMMUP00000000937	ENSMMUP00000000937	yes	yes	3,4	0.00010386	85.493		1	2		1	2	46257000	0	10929000	35328000
5541	155	EKADIQLLVYTIDDLIDK	18	1	2104.13	ENSMMUP00000000937	ENSMMUP00000000937	yes	yes	3	7.6239e-05	104.21		1			1		1300200	0	1300200	0
16293	155	LLHGMKDDIVPWHTSMQVADR	21	1	2448.2	ENSMMUP00000000937	ENSMMUP00000000937	yes	yes	2,3,4,5	1.1596e-22	162.09	4	2	4	4	2	4	94765000	29700000	38302000	26763000
25453	155	TSLSFLNRPDLPNLAYK	17	1	1948.04	ENSMMUP00000000937	ENSMMUP00000000937	yes	yes	3	0.12222	50.806			1			1	4467000	0	0	4467000
29478	155	YSEEGVYNVQYSFIK	15	0	1824.86	ENSMMUP00000000937	ENSMMUP00000000937	yes	yes	2	5.9926e-07	147.7	2	2	2	2	2	2	64797000	19723000	26982000	18092000
1057	156	AKDAELAWIDGVLDMR	16	1	1801.9	ENSMMUP00000000940	ENSMMUP00000000940	yes	yes	3	9.3626e-05	141.55	4	4	4	4	4	4	34654000	9412400	21807000	3435100
2475	156	DAELAWIDGVLDMR	14	0	1602.77	ENSMMUP00000000940	ENSMMUP00000000940	yes	yes	2,3	2.6438e-52	216.68	8	7	8	8	7	8	42315000	11263000	16810000	14242000
9163	156	GHGLSITPLPAGHMIGGTIWK	21	0	2142.14	ENSMMUP00000000940	ENSMMUP00000000940	yes	yes	3	0.0028004	59.372			1			1	4079200	0	0	4079200
11044	156	HNTEDFTLFTLDDVDAAFDK	20	0	2313.04	ENSMMUP00000000940	ENSMMUP00000000940	yes	yes	2,3	4.9318e-24	169.25	2	2	3	2	2	3	39668000	9779000	12708000	17181000
11307	156	HVHQIDAVLLSHPDPLHLGALPYAVGK	27	0	2896.57	ENSMMUP00000000940	ENSMMUP00000000940	yes	yes	3,4,5	3.0543e-05	69.704	2	2	3	2	2	3	49033000	15146000	22239000	11648000
12259	156	IKWDEYGEIIKPEDFLVPELQATEEEK	27	2	3247.62	ENSMMUP00000000940	ENSMMUP00000000940	yes	yes	3,4	1.2101e-16	109.91	4	4	4	4	4	4	66031000	23188000	16874000	25970000
13744	156	KHVHQIDAVLLSHPDPLHLGALPYAVGK	28	1	3024.67	ENSMMUP00000000940	ENSMMUP00000000940	yes	yes	5	0.071445	34.459			1			1	1892000	0	0	1892000
15732	156	LHETVDATSETHIYQVR	17	0	1997.98	ENSMMUP00000000940	ENSMMUP00000000940	yes	yes	3,4	0.0001562	98.943	2			2			2331100	2331100	0	0
18441	156	MGQMFMYDLYQSR	13	0	1668.71	ENSMMUP00000000940	ENSMMUP00000000940	yes	yes	2	2.5947e-05	123.38			1			1	5975000	0	0	5975000
23140	156	SLFGDDEKETGEESEIIPTLEPLPPHEVPGHQSVFMNEPR	40	1	4486.13	ENSMMUP00000000940	ENSMMUP00000000940	yes	yes	5	0.00067081	47.105	1	1	1	1	1	1	72974000	26241000	20605000	26129000
28043	156	WDEYGEIIKPEDFLVPELQATEEEK	25	1	3006.44	ENSMMUP00000000940	ENSMMUP00000000940	yes	yes	3	0.00031513	74.251	1			1			5077100	5077100	0	0
3060	157	DHIPITDSPVVVQQHMLPPKK	21	1	2378.28	ENSMMUP00000000943	ENSMMUP00000000943	yes	yes	4	0.012377	54.805	1			1			17148000	17148000	0	0
12493	157	IMGNIWDASLVVER	14	0	1601.82	ENSMMUP00000000943	ENSMMUP00000000943	yes	yes	3	0.045993	88.092	1			1			507080	507080	0	0
12904	157	ISLQAIQQLVR	11	0	1267.76	ENSMMUP00000000943	ENSMMUP00000000943	yes	yes	2	1.3885e-05	138.99	1	4	3	1	4	3	16798000	1831300	9849400	5117100
21193	157	QPLARPNTLTLIHVR	15	1	1728.02	ENSMMUP00000000943	ENSMMUP00000000943	yes	yes	4	0.12705	54.276	1			1			954340	954340	0	0
25876	157	VASVSQNAIVSAAGNIAR	18	0	1726.93	ENSMMUP00000000943	ENSMMUP00000000943	yes	yes	2	2.3505e-13	163.41	1	1	1	1	1	1	29960000	11020000	10781000	8158800
25968	157	VDGHSWALSAIDELKVDK	18	1	1982.01	ENSMMUP00000000943	ENSMMUP00000000943	yes	yes	4	0.027663	59.673		1	1		1	1	13595000	0	3991700	9603100
2290	158	AWGTWGPGAEPEDWGILGR	19	0	2053.96	ENSMMUP00000000955	ENSMMUP00000000955	yes	yes	2	1.724e-40	191.37	2	2	2	2	2	2	87377000	25227000	32395000	29755000
4635	158	EAGSSAVEQTWSWGDGSSHGSQAER	25	0	2605.11	ENSMMUP00000000955	ENSMMUP00000000955	yes	yes	3	1.2029e-06	81.016		1	3		1	3	24151000	0	7507600	16644000
9018	158	GGAASSWSEAPLPGSLLDVSVPR	23	0	2252.14	ENSMMUP00000000955	ENSMMUP00000000955	yes	yes	2	1.5436e-07	98.74		1	1		1	1	6232400	0	3598700	2633700
9148	158	GHEEWPTHQAPAEAAPGSVGEAETAEATGSAR	32	0	3200.44	ENSMMUP00000000955	ENSMMUP00000000955	yes	yes	4	3.8794e-06	60.029		1	1		1	1	8556400	0	5771900	2784500
21939	158	RPLGHGFDLMHPGMMQELQAR	21	1	2420.17	ENSMMUP00000000955	ENSMMUP00000000955	yes	yes	3,4,5	6.0549e-08	123.63	3		2	3		2	32895000	13911000	0	18984000
27906	158	VWVLEEEGDEEREAEVSPFPK	21	1	2473.16	ENSMMUP00000000955	ENSMMUP00000000955	yes	yes	3	5.5929e-05	104.21	2	2		2	2		35255000	15537000	19717000	0
83	159	AAGSGELSVTVK	12	0	1117.6	ENSMMUP00000000958;ENSMMUP00000000960;ENSMMUP00000000961;ENSMMUP00000000962	ENSMMUP00000000958	yes	no	2	0.0021547	87.719	2	1	1	2	1	1	322120	177390	102970	41763
308	159	ADIEMPFDPSK	11	0	1248.57	ENSMMUP00000000958;ENSMMUP00000000960;ENSMMUP00000000961;ENSMMUP00000000962	ENSMMUP00000000958	yes	no	2	0.0011029	101.39	2	2	1	2	2	1	47220000	24827000	19809000	2585000
809	159	AGSNMLLIGVHGPTTPCEEVSMK	23	0	2427.16	ENSMMUP00000000958;ENSMMUP00000000960;ENSMMUP00000000961	ENSMMUP00000000958	yes	no	2,3	4.8583e-08	109.37	3	4	5	3	4	5	141590000	32223000	63746000	45622000
882	159	AHGPGLEGGLVGKPAEFTIDTK	22	1	2193.14	ENSMMUP00000000958;ENSMMUP00000000960;ENSMMUP00000000961;ENSMMUP00000000962	ENSMMUP00000000958	yes	no	2,3,4	1.082e-36	174.63	12	10	12	12	10	12	947190000	410410000	291070000	245700000
884	159	AHIANPSGASTECFVTDNADGTYQVEYTPFEK	32	0	3518.56	ENSMMUP00000000958;ENSMMUP00000000960;ENSMMUP00000000961;ENSMMUP00000000962	ENSMMUP00000000958	yes	no	3	5.1777e-43	130.71			1			1	1990200	0	0	1990200
1042	159	AIVHDNKDGTYAVTYIPDK	19	1	2119.06	ENSMMUP00000000958;ENSMMUP00000000960;ENSMMUP00000000961;ENSMMUP00000000962	ENSMMUP00000000958	yes	no	2,3,4	1.6911e-22	170.89	6	6	8	6	6	8	160340000	101210000	22019000	37105000
1213	159	ALGALVDSCAPGLCPDWESWDPQKPVDNAR	30	1	3323.53	ENSMMUP00000000958;ENSMMUP00000000960;ENSMMUP00000000961;ENSMMUP00000000962	ENSMMUP00000000958	yes	no	3	9.1383e-06	69.619		1			1		4657900	0	4657900	0
1627	159	APLNVQFNSPLPGDAVK	17	0	1765.94	ENSMMUP00000000958;ENSMMUP00000000960;ENSMMUP00000000961;ENSMMUP00000000962	ENSMMUP00000000958	yes	no	2	1.6434e-16	174.52	2	2	3	2	2	3	281900000	68637000	105500000	107770000
2500	159	DAGEGLLAVQITDQEGKPK	19	1	1968.02	ENSMMUP00000000958;ENSMMUP00000000960;ENSMMUP00000000961;ENSMMUP00000000962	ENSMMUP00000000958	yes	no	2	4.5198e-65	221.13	3	4	4	3	4	4	93548000	26527000	36490000	30532000
2510	159	DAGYGGISLAVEGPSK	16	0	1519.75	ENSMMUP00000000958;ENSMMUP00000000960;ENSMMUP00000000961;ENSMMUP00000000962	ENSMMUP00000000958	yes	no	2	1.2851e-15	174.95	2	2	1	2	2	1	58205000	21180000	23265000	13760000
3006	159	DGTCTVTYLPTLPGDYSILVK	21	0	2312.16	ENSMMUP00000000958;ENSMMUP00000000960;ENSMMUP00000000961;ENSMMUP00000000962	ENSMMUP00000000958	yes	no	2	0.0012847	65.887			1			1	2023500	0	0	2023500
3018	159	DGTYAVTYVPLTAGMYTLTMK	21	0	2295.12	ENSMMUP00000000958;ENSMMUP00000000960;ENSMMUP00000000961;ENSMMUP00000000962	ENSMMUP00000000958	yes	no	2,3	4.2593e-38	187.39	7	8	5	7	8	5	154200000	42907000	80219000	31075000
3395	159	DLDVIDNYDYSHTVK	15	0	1795.83	ENSMMUP00000000958;ENSMMUP00000000960;ENSMMUP00000000961;ENSMMUP00000000962	ENSMMUP00000000958	yes	no	2,3	8.2028e-53	220.21	7	8	5	7	8	5	299190000	110920000	139270000	49001000
4609	159	EAFTNKPNVFTVVTR	15	1	1721.91	ENSMMUP00000000958;ENSMMUP00000000960;ENSMMUP00000000961;ENSMMUP00000000962	ENSMMUP00000000958	yes	no	2,3	3.4144e-06	146.96	8	7	7	8	7	7	338980000	138720000	89054000	111200000
4699	159	EAMQQADDWLGVPQVITPEEIIHPDVDEHSVMTYLSQFPK	40	0	4592.19	ENSMMUP00000000958;ENSMMUP00000000960;ENSMMUP00000000961;ENSMMUP00000000962	ENSMMUP00000000958	yes	no	3,4,5	6.6923e-37	108.99	6	5	4	6	5	4	169610000	39133000	85465000	45015000
4735	159	EATTDFTVDSRPLTQVGGDHIK	22	1	2386.18	ENSMMUP00000000958;ENSMMUP00000000960;ENSMMUP00000000961;ENSMMUP00000000962	ENSMMUP00000000958	yes	no	3	2.2007e-05	85.937	1	2		1	2		59054000	3743800	55310000	0
4943	159	EEGLYAVDVTYDGHPVPGSPYTVEASLPPDPTK	33	0	3499.67	ENSMMUP00000000958;ENSMMUP00000000960;ENSMMUP00000000961;ENSMMUP00000000962	ENSMMUP00000000958	yes	no	3	1.9145e-14	85.881		1			1		3902700	0	3902700	0
6201	159	EPGEYAVHIMCDDEDIKDSPYMAFIHPATGDYNPDLVR	38	1	4379.94	ENSMMUP00000000958;ENSMMUP00000000960;ENSMMUP00000000961;ENSMMUP00000000962	ENSMMUP00000000958	yes	no	3,4	0.0029498	41.591	1	1	2	1	1	2	45835000	4368800	18764000	22703000
7764	159	FNDEHIPDSPYLVPVIAPSDDAR	23	0	2566.23	ENSMMUP00000000958;ENSMMUP00000000960;ENSMMUP00000000961	ENSMMUP00000000958	yes	no	2,3	9.6766e-08	104.67	3	5	4	3	5	4	285280000	62678000	150000000	72601000
7765	159	FNDEHIPDSPYLVPVIAPSDDARR	24	1	2722.34	ENSMMUP00000000958;ENSMMUP00000000960;ENSMMUP00000000961	ENSMMUP00000000958	yes	no	4	0.00039445	68.168	1			1			5168200	5168200	0	0
7779	159	FNGSHVVGSPFK	12	0	1274.64	ENSMMUP00000000958;ENSMMUP00000000960;ENSMMUP00000000961	ENSMMUP00000000958	yes	no	2	0.12745	41.242	1			1			2543400	2543400	0	0
8307	159	FVPQEMGMHTVSVK	14	0	1588.77	ENSMMUP00000000958;ENSMMUP00000000960;ENSMMUP00000000961	ENSMMUP00000000958	yes	no	2	0.0005268	93.51	1			1			11065000	11065000	0	0
8483	159	GAGIGGLGITVEGPSESK	18	0	1627.84	ENSMMUP00000000958;ENSMMUP00000000960;ENSMMUP00000000961;ENSMMUP00000000962	ENSMMUP00000000958	yes	no	2	1.9881e-06	123.08	3	3	2	3	3	2	172230000	41055000	71472000	59708000
8718	159	GEAGVPAEFSIWTR	14	0	1518.75	ENSMMUP00000000958;ENSMMUP00000000960;ENSMMUP00000000961	ENSMMUP00000000958	yes	no	2	3.0766e-05	121.45		1	3		1	3	80674000	0	36472000	44202000
8947	159	GFLDGVYAFEYYPSTPGR	18	0	2037.95	ENSMMUP00000000958;ENSMMUP00000000960;ENSMMUP00000000961;ENSMMUP00000000962	ENSMMUP00000000958	yes	no	2,3	4.8055e-10	156.57	5	7	7	5	7	7	694360000	179350000	206020000	308990000
9524	159	GLHVVEVTYDDVPIPNSPFK	20	0	2225.14	ENSMMUP00000000958;ENSMMUP00000000960;ENSMMUP00000000961;ENSMMUP00000000962	ENSMMUP00000000958	yes	no	2,3	2.4331e-137	262.25	9	8	7	9	8	7	392700000	153760000	141980000	96962000
9645	159	GLVEPVNVVDNGDGTHTVTYTPSQEGPFMVSVK	33	0	3472.68	ENSMMUP00000000958;ENSMMUP00000000960;ENSMMUP00000000961;ENSMMUP00000000962	ENSMMUP00000000958	yes	no	3,4	1.0674e-13	81.534	3	5	4	3	5	4	274220000	66811000	130090000	77324000
9921	159	GQHVTGSPFQFTVGPLGEGGAHK	23	0	2307.14	ENSMMUP00000000958;ENSMMUP00000000960;ENSMMUP00000000961	ENSMMUP00000000958	yes	no	2,3,4	5.035e-83	213.23	6	8	10	6	8	10	418060000	125060000	130180000	162830000
11250	159	HTIAVVWGGVNIPHSPFR	18	0	1986.06	ENSMMUP00000000958;ENSMMUP00000000960;ENSMMUP00000000961;ENSMMUP00000000962	ENSMMUP00000000958	yes	no	3	3.4235e-05	101.01		2			2		4232700	0	4232700	0
11820	159	IFAQDGEGQPIDIQMK	16	0	1788.87	ENSMMUP00000000958;ENSMMUP00000000960;ENSMMUP00000000961;ENSMMUP00000000962	ENSMMUP00000000958	yes	no	2	1.2926e-53	220.27	2	2	2	2	2	2	145200000	45193000	52013000	47998000
11985	159	IGNLQTDLSDGLR	13	0	1400.73	ENSMMUP00000000958;ENSMMUP00000000960;ENSMMUP00000000961;ENSMMUP00000000962	ENSMMUP00000000958	yes	no	2	0.00034035	107.14	2	1	1	2	1	1	46380000	24454000	17260000	4665800
12617	159	IPEINSSDMSAHVTSPSGR	19	0	1983.93	ENSMMUP00000000958;ENSMMUP00000000960	ENSMMUP00000000958	yes	no	2,3	4.4427e-17	160.27	4	4	5	4	4	5	74870000	29972000	21457000	23442000
12708	159	IPYLPITNFNQNWQDGK	17	0	2047.02	ENSMMUP00000000958;ENSMMUP00000000960;ENSMMUP00000000961;ENSMMUP00000000962	ENSMMUP00000000958	yes	no	2,3	8.9095e-104	246.96	8	9	8	8	9	8	450030000	139730000	182310000	127990000
15653	159	LGSAADFLLDISETDLSSLTASIK	24	0	2466.27	ENSMMUP00000000958;ENSMMUP00000000960;ENSMMUP00000000961;ENSMMUP00000000962	ENSMMUP00000000958	yes	no	3	9.9459e-05	71.527			1			1	148760	0	0	148760
16895	159	LPNNHIGISFIPR	13	0	1476.82	ENSMMUP00000000958;ENSMMUP00000000960;ENSMMUP00000000961;ENSMMUP00000000962	ENSMMUP00000000958	yes	no	2,3	5.3815e-08	145.29	9	6	8	9	6	8	293540000	146200000	59372000	87966000
17828	159	LVSPGSANETSSILVESVTR	20	0	2045.06	ENSMMUP00000000958;ENSMMUP00000000960;ENSMMUP00000000961	ENSMMUP00000000958	yes	no	2,3	4.6153e-10	126.84	4	4	2	4	4	2	192130000	56394000	83969000	51767000
19385	159	NGNHVANSPVSIMVVQSEIGDAR	23	0	2393.18	ENSMMUP00000000958;ENSMMUP00000000960;ENSMMUP00000000961;ENSMMUP00000000962	ENSMMUP00000000958	yes	no	3	1.4106e-31	159.75	1	2	3	1	2	3	29591000	4928700	12007000	12655000
21834	159	RLPNNHIGISFIPR	14	1	1632.92	ENSMMUP00000000958;ENSMMUP00000000960;ENSMMUP00000000961;ENSMMUP00000000962	ENSMMUP00000000958	yes	no	2,3,4	4.2741e-07	143.25	3	5	4	3	5	4	85156000	35351000	31004000	18801000
22651	159	SGCIVSNLAEFTVDPK	16	0	1735.85	ENSMMUP00000000958;ENSMMUP00000000960;ENSMMUP00000000961;ENSMMUP00000000962	ENSMMUP00000000958	yes	no	2	1.5253e-05	141.86	2	2	2	2	2	2	30836000	8352100	12611000	9873000
23544	159	SPFEVQVGPEAGMQK	15	0	1602.77	ENSMMUP00000000958;ENSMMUP00000000960;ENSMMUP00000000961;ENSMMUP00000000962	ENSMMUP00000000958	yes	no	2	1.4878e-05	139.66		1	1		1	1	28002000	0	25737000	2264400
23550	159	SPFTVGVAAPLDLSK	15	0	1500.82	ENSMMUP00000000958;ENSMMUP00000000960;ENSMMUP00000000961;ENSMMUP00000000962	ENSMMUP00000000958	yes	no	2	2.6685e-05	133.47	1	3	2	1	3	2	204720000	49605000	93547000	61571000
24391	159	TATPEIVDNKDGTVTVR	17	1	1814.94	ENSMMUP00000000958;ENSMMUP00000000960;ENSMMUP00000000961;ENSMMUP00000000962	ENSMMUP00000000958	yes	no	3	0.029467	62.377	2		1	2		1	1749100	1378200	0	370840
24613	159	TFEMSDFIVDTR	12	0	1459.67	ENSMMUP00000000958;ENSMMUP00000000960;ENSMMUP00000000961;ENSMMUP00000000962	ENSMMUP00000000958	yes	no	2	2.2645e-07	147.24	5	4	3	5	4	3	94809000	33645000	45005000	16159000
26269	159	VFFAGDTIPK	10	0	1093.58	ENSMMUP00000000958;ENSMMUP00000000960;ENSMMUP00000000961;ENSMMUP00000000962	ENSMMUP00000000958	yes	no	2	0.016788	71.349	1	1	1	1	1	1	25854000	7585200	11591000	6677600
26378	159	VGEAGLLSVDCSEAGPGALGLEAVSDSGAK	30	0	2815.35	ENSMMUP00000000958;ENSMMUP00000000960;ENSMMUP00000000961;ENSMMUP00000000962	ENSMMUP00000000958	yes	no	2	0.00073496	47.757	1			1			6764900	6764900	0	0
26788	159	VLFASQEIPASPFR	14	0	1560.83	ENSMMUP00000000958;ENSMMUP00000000960;ENSMMUP00000000961;ENSMMUP00000000962	ENSMMUP00000000958	yes	no	2	2.4508e-11	160.65	2	2	1	2	2	1	169650000	58121000	80945000	30581000
26963	159	VLSEDEEDVDFDIIHNANDTFTVK	24	0	2764.27	ENSMMUP00000000958;ENSMMUP00000000960;ENSMMUP00000000961;ENSMMUP00000000962	ENSMMUP00000000958	yes	no	3	3.3922e-07	89.028	1	4	3	1	4	3	151820000	7567600	87518000	56736000
27082	159	VMYTPMAPGNYLIGVK	16	0	1752.89	ENSMMUP00000000958;ENSMMUP00000000960;ENSMMUP00000000961	ENSMMUP00000000958	yes	no	2	1.3098e-10	164.2	4	4	4	4	4	4	165990000	50279000	61613000	54101000
27576	159	VSYFPTVPGVYIVSTK	16	0	1755.94	ENSMMUP00000000958;ENSMMUP00000000960;ENSMMUP00000000961;ENSMMUP00000000962	ENSMMUP00000000958	yes	no	2,3	1.6713e-05	141.34	6	6	6	6	6	6	263190000	79383000	97321000	86489000
27589	159	VTASGPGLSSYGVPASLPVDFAIDAR	26	0	2546.3	ENSMMUP00000000958;ENSMMUP00000000960;ENSMMUP00000000961;ENSMMUP00000000962	ENSMMUP00000000958	yes	no	3	2.669e-17	120.25	1	1		1	1		33711000	10744000	22966000	0
28167	159	WGEEHIPGSPFHVTVP	16	0	1787.86	ENSMMUP00000000958;ENSMMUP00000000960;ENSMMUP00000000961	ENSMMUP00000000958	yes	no	2,3	0.0020472	76.728	6	3	4	6	3	4	482520000	332570000	82480000	67465000
28880	159	YGGELVPHFPAR	12	0	1341.68	ENSMMUP00000000958;ENSMMUP00000000960;ENSMMUP00000000961;ENSMMUP00000000962	ENSMMUP00000000958	yes	no	2,3	0.00026238	112.36	10	10	11	10	10	11	750770000	422710000	142230000	185840000
29235	159	YMIGVTYGGDDIPLSPYR	18	0	2015.97	ENSMMUP00000000958;ENSMMUP00000000960;ENSMMUP00000000961;ENSMMUP00000000962	ENSMMUP00000000958	yes	no	2,3	1.3346e-46	204.07	6	7	5	6	7	5	329730000	86368000	128250000	115120000
29450	159	YRGQHVTGSPFQFTVGPLGEGGAHK	25	1	2626.3	ENSMMUP00000000958;ENSMMUP00000000960;ENSMMUP00000000961	ENSMMUP00000000958	yes	no	4	0.0029518	60.325	1			1			19001000	19001000	0	0
29495	159	YSIAITWGGHHIPK	14	0	1578.83	ENSMMUP00000000958;ENSMMUP00000000960;ENSMMUP00000000961;ENSMMUP00000000962	ENSMMUP00000000958	yes	no	2,3,4	1.1395e-08	152.47	3	2	5	3	2	5	30628000	20358000	3800700	6470100
29574	159	YTPTQQGNMQVLVTYGGDPIPK	22	0	2406.19	ENSMMUP00000000958;ENSMMUP00000000960;ENSMMUP00000000961;ENSMMUP00000000962	ENSMMUP00000000958	yes	no	2	5.9148e-07	110.75	2	2	2	2	2	2	56495000	17626000	18693000	20176000
1242	161	ALHQVFEHMLDVSK	14	0	1652.83	ENSMMUP00000000980;ENSMMUP00000034033;ENSMMUP00000034035	ENSMMUP00000000980	yes	no	2,3,4	1.9055e-22	184.76	7	7	6	7	7	6	195830000	55441000	65961000	74423000
2179	161	AVISPGFDVFAK	12	0	1249.67	ENSMMUP00000000980;ENSMMUP00000034033;ENSMMUP00000034035	ENSMMUP00000000980	yes	no	2	3.9924e-10	155.97	3	5	3	3	5	3	117430000	46364000	47170000	23900000
2772	161	DFHINLFR	8	0	1060.55	ENSMMUP00000000980;ENSMMUP00000034033	ENSMMUP00000000980	yes	no	2,3	0.0012735	120.46	7	4	6	7	4	6	118840000	44975000	43419000	30445000
3232	161	DITEVISSLENAK	13	0	1417.73	ENSMMUP00000000980;ENSMMUP00000034035	ENSMMUP00000000980	yes	no	2	1.6637e-160	289.37	2	3	2	2	3	2	50062000	9449800	24085000	16528000
8503	161	GALISDQWVLTAAHCFR	17	0	1943.97	ENSMMUP00000000980;ENSMMUP00000034033;ENSMMUP00000034035	ENSMMUP00000000980	yes	no	2,3	3.187e-05	130.01	4	3	4	4	3	4	135740000	62187000	32323000	41233000
14100	161	KNQGILEFYGDDIALLK	17	1	1936.03	ENSMMUP00000000980;ENSMMUP00000034033;ENSMMUP00000034035	ENSMMUP00000000980	yes	no	2,3	8.6987e-24	188.71	4	4	3	4	4	3	305210000	106460000	93067000	105680000
19191	161	NDYLDIYAIGVGK	13	0	1439.73	ENSMMUP00000000980;ENSMMUP00000034033;ENSMMUP00000034035	ENSMMUP00000000980	yes	no	2	0.00021962	143.25	1	2	2	1	2	2	11087000	4236300	4981500	1869600
19992	161	NQGILEFYGDDIALLK	16	0	1807.94	ENSMMUP00000000980;ENSMMUP00000034033;ENSMMUP00000034035	ENSMMUP00000000980	yes	no	2	1.0398e-22	188.47	1	5	5	1	5	5	100700000	4895100	53846000	41955000
20990	161	QHLGDVLNFLPL	12	0	1364.75	ENSMMUP00000000980;ENSMMUP00000034033	ENSMMUP00000000980	yes	no	2	1.9431e-09	147.74	1	3	1	1	3	1	14809000	5775200	6817800	2215500
21205	161	QPYSYDFPEDVAPALGTSFSHMLGATNPTQR	31	0	3396.57	ENSMMUP00000000980;ENSMMUP00000034033;ENSMMUP00000025837	ENSMMUP00000000980	yes	no	3	3.4948e-06	65.801	1	1	1	1	1	1	25826000	6165000	8239800	11421000
21880	161	RNDYLDIYAIGVGK	14	1	1595.83	ENSMMUP00000000980;ENSMMUP00000034033;ENSMMUP00000034035	ENSMMUP00000000980	yes	no	2,3	2.2959e-16	178.15	4	4	2	4	4	2	199660000	88751000	66467000	44439000
26902	161	VLMSVLNVNSR	11	0	1230.68	ENSMMUP00000000980;ENSMMUP00000034035	ENSMMUP00000000980	yes	no	2	0.00095436	102.4	1		1	1		1	5021500	3187200	0	1834200
345	162	ADMEAEAPTFQALEDFGAELIDSEHR	26	0	2891.29	ENSMMUP00000000984;ENSMMUP00000012226	ENSMMUP00000000984	yes	no	3	5.5303e-11	95.195	1	2	1	1	2	1	8416200	1733200	4242800	2440200
2328	162	AYFLDGSLLK	10	0	1125.61	ENSMMUP00000000984;ENSMMUP00000012226	ENSMMUP00000000984	yes	no	2	0.074852	52.79	1			1			724390	724390	0	0
3368	162	DLASAGNLLKK	11	1	1128.65	ENSMMUP00000000984;ENSMMUP00000012226	ENSMMUP00000000984	yes	no	2	0.13705	46.844	1			1			2302400	2302400	0	0
22017	162	RQNDLEANVQFQQYLADLHEAETWIR	26	1	3186.55	ENSMMUP00000000984;ENSMMUP00000012226	ENSMMUP00000000984	yes	no	4	3.061e-05	77.575	1	1		1	1		4642400	1693100	2949200	0
4627	163	EAGIPEFYDYDVALIK	16	0	1841.91	ENSMMUP00000000985	ENSMMUP00000000985	yes	yes	2,3	2.7303e-53	215.87	14	13	11	14	13	11	1277900000	385840000	494510000	397520000
5603	163	EKLQDEDLGFL	11	1	1305.65	ENSMMUP00000000985	ENSMMUP00000000985	yes	yes	2	5.7569e-73	231.05	4	5	5	4	5	5	158260000	84523000	50717000	23022000
7536	163	FLCTGGVSPYADPNTCR	17	0	1913.84	ENSMMUP00000000985	ENSMMUP00000000985	yes	yes	2	4.8921e-05	110.04			1			1	4082400	0	0	4082400
11309	163	HVIILMTDGLHNMGGDPITVIDEIR	25	0	2758.41	ENSMMUP00000000985;ENSMMUP00000000987	ENSMMUP00000000985	yes	no	4	0.00080447	59.356			2			2	2858500	0	0	2858500
13457	163	KEAGIPEFYDYDVALIK	17	1	1970	ENSMMUP00000000985	ENSMMUP00000000985	yes	yes	2,3	4.1273e-05	123.14	4	4	2	4	4	2	167120000	62474000	53559000	51085000
16433	163	LLQEGQALEYVCPSGFYPYPVQTR	24	0	2814.37	ENSMMUP00000000985;ENSMMUP00000000987	ENSMMUP00000000985	yes	no	2,3	3.8791e-10	111.66	4	4	6	4	4	6	102500000	29658000	27838000	45007000
16762	163	LNYDPTIRPICLPCTEGTTR	20	1	2376.16	ENSMMUP00000000985	ENSMMUP00000000985	yes	yes	3	0.00029268	84.653	2	3	1	2	3	1	35590000	18779000	15047000	1764400
16911	163	LPPTTTCQQQKEELLPAQDIK	21	1	2437.25	ENSMMUP00000000985	ENSMMUP00000000985	yes	yes	3	0.0029975	68.168	3	2		3	2		31030000	14552000	16478000	0
17016	163	LQDEDLGFL	9	0	1048.51	ENSMMUP00000000985	ENSMMUP00000000985	yes	yes	2	5.9872e-06	148.52	3	2	2	3	2	2	6028500	1275700	3827800	925030
28601	163	YALVTYATYPR	11	0	1316.68	ENSMMUP00000000985;ENSMMUP00000000987	ENSMMUP00000000985	yes	no	2	5.2733e-48	212.72	2	4		2	4		68195000	14287000	53907000	0
8475	164	GAFSPFGNIIDLSMDPPR	18	0	1932.94	ENSMMUP00000000988;ENSMMUP00000034024;ENSMMUP00000000989;ENSMMUP00000034023	ENSMMUP00000000988	yes	no	2,3	3.2424e-13	161.24	6	4	2	6	4	2	21231000	13585000	3231200	4415100
13672	164	KGNTLYVYGEDMTPTLLR	18	1	2070.05	ENSMMUP00000000988;ENSMMUP00000034024;ENSMMUP00000000989;ENSMMUP00000034023	ENSMMUP00000000988	yes	no	2,3	2.1787e-09	153.75	2	3	2	2	3	2	35117000	12454000	15604000	7059200
1276	165	ALLEVLGR	8	0	869.533	ENSMMUP00000000990	ENSMMUP00000000990	yes	yes	2	0.0077355	123.69	1	1		1	1		0	0	0	0
5650	165	EKYSIGEPTVPSTLAEEFTYNPFMR	25	1	2905.38	ENSMMUP00000000990	ENSMMUP00000000990	yes	yes	3	2.5337e-10	99.957	1	2	1	1	2	1	46020000	13999000	26492000	5528900
13035	165	ITHLSTLQVGSLNVK	15	0	1608.92	ENSMMUP00000000990	ENSMMUP00000000990	yes	yes	3	0.00025313	94.717	1	1	2	1	1	2	41590000	17864000	3737000	19990000
26210	165	VEVLPALTDNYMYLVIDDETK	21	0	2440.21	ENSMMUP00000000990	ENSMMUP00000000990	yes	yes	2,3	3.5554e-19	155.88			2			2	6143200	0	0	6143200
29497	165	YSIGEPTVPSTLAEEFTYNPFMR	23	0	2648.25	ENSMMUP00000000990	ENSMMUP00000000990	yes	yes	2,3	4.8583e-08	109.37	5	5	4	5	5	4	158370000	51351000	56940000	50077000
12204	166	IITLEEGDIILTGTPK	16	0	1711.96	ENSMMUP00000000991	ENSMMUP00000000991	yes	yes	2	6.8503e-42	211.7	1	1	1	1	1	1	16791000	5079200	6930900	4780600
19653	166	NLHHELELGVVMGK	14	0	1574.82	ENSMMUP00000000991	ENSMMUP00000000991	yes	yes	2,3	1.2832e-11	164.68	2	2	2	2	2	2	31524000	12459000	7629800	11435000
20855	166	QEGETASMIFSIPYIISYVSK	21	0	2362.18	ENSMMUP00000000991	ENSMMUP00000000991	yes	yes	3	0.014019	49.559			1			1	493690	0	0	493690
22278	166	SAVLSEPVLFLKPSTAYAPEGSPILMPAYTR	31	1	3304.74	ENSMMUP00000000991	ENSMMUP00000000991	yes	yes	3,4	1.2075e-41	126.25	6	5	5	6	5	5	155200000	56482000	63137000	35580000
22621	166	SFTASCPVSAFVPK	14	0	1496.73	ENSMMUP00000000991	ENSMMUP00000000991	yes	yes	2	0.049077	51.939	1		1	1		1	16576000	13367000	0	3208700
3422	167	DLEWVIFDEVHYINDAER	18	0	2262.06	ENSMMUP00000000996	ENSMMUP00000000996	yes	yes	3	0.0075672	58.814			1			1	46425	0	0	46425
3910	167	DPPLAAVTTAVQELLR	16	0	1692.94	ENSMMUP00000000996	ENSMMUP00000000996	yes	yes	2,3	7.4416e-42	211.57	10	9	9	10	9	9	66508000	12969000	30910000	22628000
4378	167	DVSVVEGGLR	10	0	1029.55	ENSMMUP00000000996	ENSMMUP00000000996	yes	yes	2	0.058557	56.258	1			1			4223.1	4223.1	0	0
5527	167	EIVEMLFSR	9	0	1122.57	ENSMMUP00000000996	ENSMMUP00000000996	yes	yes	2	0.0033156	121.73	2			2			0	0	0	0
7635	167	FLLSDQSLLLLPEYHQR	17	0	2071.11	ENSMMUP00000000996	ENSMMUP00000000996	yes	yes	2,3	7.0441e-05	106.32	2	1	3	2	1	3	38961000	14535000	10175000	14251000
9519	167	GLGVHHSGILPILK	14	0	1439.86	ENSMMUP00000000996	ENSMMUP00000000996	yes	yes	3,4	0.00052326	93.623	1	1	2	1	1	2	14791000	2628500	3654000	8508000
9696	167	GMPFSELAGLSGTPEGLVVR	20	0	2016.04	ENSMMUP00000000996	ENSMMUP00000000996	yes	yes	2,3	0.020732	73.11	2			2			1836900	1836900	0	0
15453	167	LGALEEPDVTGQLVDLPEYYGWGEELTETQHMIQR	35	0	4015.91	ENSMMUP00000000996	ENSMMUP00000000996	yes	yes	3	1.1391e-32	103.42	2	2	2	2	2	2	72374000	25674000	22375000	24325000
15923	167	LIPQPAFQWAFEPDVFQK	18	0	2160.1	ENSMMUP00000000996	ENSMMUP00000000996	yes	yes	2,3	1.1372e-13	166.35	4	3	4	4	3	4	55494000	18728000	16688000	20078000
17760	167	LVLPPPDPLDLPLR	14	0	1553.92	ENSMMUP00000000996	ENSMMUP00000000996	yes	yes	2	0.00046718	95.417		2	1		2	1	3177100	0	2608500	568630
14866	168	LDHLLCWLLEHR	12	0	1603.83	ENSMMUP00000000999	ENSMMUP00000000999	yes	yes	4	0.042065	55.452	1		1	1		1	89726	41429	0	48297
15102	168	LEGGPGWLAEAIVTWR	16	0	1753.92	ENSMMUP00000000999	ENSMMUP00000000999	yes	yes	2,3	3.6997e-05	134.81		2	1		2	1	1673500	0	1224500	448920
20504	168	PGSSPDPSGEVNTNVAFCSVLR	22	0	2289.07	ENSMMUP00000000999	ENSMMUP00000000999	yes	yes	2	0.12031	32.121		1			1		12618000	0	12618000	0
3086	169	DHVYLQLHHLPPEQLATR	18	0	2166.13	ENSMMUP00000001008	ENSMMUP00000001008	yes	yes	2,3,4	2.0662e-26	184.32	3	2	3	3	2	3	126400000	40535000	37397000	48468000
6213	169	EPIPVLPTVHYNMGGIPTNYK	21	0	2339.2	ENSMMUP00000001008	ENSMMUP00000001008	yes	yes	3	2.958e-05	85.203	4	4	5	4	4	5	165020000	37361000	37411000	90243000
8573	169	GCGPEKDHVYLQLHHLPPEQLATR	24	1	2794.4	ENSMMUP00000001008	ENSMMUP00000001008	yes	yes	3,4	8.1687e-09	102.48	1	2	2	1	2	2	29723000	7455100	14363000	7904900
11322	169	HVNGQDQIVPGLYACGEAACASVHGANR	28	0	2950.36	ENSMMUP00000001008	ENSMMUP00000001008	yes	yes	4	0.095301	29.492	1			1			13900000	13900000	0	0
15454	169	LGANSLLDLVVFGR	14	0	1472.84	ENSMMUP00000001008	ENSMMUP00000001008	yes	yes	2,3	6.0995e-66	228.78	15	13	12	15	13	12	212460000	63884000	93265000	55310000
16837	169	LPGISETAMIFAGVDVTK	18	0	1847.97	ENSMMUP00000001008	ENSMMUP00000001008	yes	yes	3	2.1404e-06	117			1			1	421450	0	0	421450
241	170	AAYSYRPGPGAGPGPAAGAALPDQSFLWNVFQR	33	1	3388.67	ENSMMUP00000001011	ENSMMUP00000001011	yes	yes	3,4	2.6587e-46	130.32		10			10		71759000	0	71759000	0
831	170	AGVNFSEFTGVWK	13	0	1440.7	ENSMMUP00000001011	ENSMMUP00000001011	yes	yes	2	1.8139e-18	173.19	8	7	7	8	7	7	902620000	332440000	313180000	257000000
20495	170	PGPGAGPGPAAGAALPDQSFLWNVFQR	27	0	2677.34	ENSMMUP00000001011	ENSMMUP00000001011	yes	yes	2,3	2.4323e-28	131.82		2	5		2	5	69256000	0	11724000	57532000
22766	170	SGVISDTELQQALSNGTWTPFNPVTVR	27	0	2916.46	ENSMMUP00000001011	ENSMMUP00000001011	yes	yes	2,3	1.3144e-53	164.82	6	4	5	6	4	5	231060000	62954000	95247000	72856000
22902	170	SIISMFDR	8	0	967.48	ENSMMUP00000001011	ENSMMUP00000001011	yes	yes	2	0.00037513	141.2	5	5	8	5	5	8	79620000	41817000	26532000	11271000
29042	170	YITDWQNVFR	10	0	1340.65	ENSMMUP00000001011	ENSMMUP00000001011	yes	yes	2	4.899e-29	194.06	2	2	2	2	2	2	527480000	203070000	150850000	173570000
8343	171	FWDLSTETPHFTCK	14	0	1767.79	ENSMMUP00000001013	ENSMMUP00000001013	yes	yes	3	0.00028049	101.39	1	1	1	1	1	1	8485600	3999900	1707200	2778500
17819	171	LVSGSDDFTLFLWSPAEDKKPLTR	24	2	2721.4	ENSMMUP00000001013	ENSMMUP00000001013	yes	yes	4	0.045464	57.482	1	1		1	1		9331600	6912100	2419500	0
26748	171	VLDIIYQPQAVFR	13	0	1560.87	ENSMMUP00000001013	ENSMMUP00000001013	yes	yes	2	0.0039987	77.527	1		1	1		1	3747400	2599800	0	1147600
28168	171	WGGDGLLYSASQDR	14	0	1523.7	ENSMMUP00000001013	ENSMMUP00000001013	yes	yes	2	5.3893e-06	133.48		1	1		1	1	4777900	0	2365200	2412700
1045	172	AIVWGLFR	8	0	960.555	ENSMMUP00000001016;ENSMMUP00000001018	ENSMMUP00000001016	yes	no	2	0.052964	93.262			1			1	117810	0	0	117810
4113	172	DSNNNSILHMWHLHLK	16	0	1957.96	ENSMMUP00000001016	ENSMMUP00000001016	yes	yes	3,4	0.013605	58.32	1		2	1		2	1381100	825160	0	555990
7956	172	FQLYNWLEK	9	0	1239.63	ENSMMUP00000001016;ENSMMUP00000001018	ENSMMUP00000001016	yes	no	2	0.0094201	82.261	1	1	2	1	1	2	4866800	2123100	1174500	1569200
15301	172	LFFTTANAHFK	11	0	1295.67	ENSMMUP00000001016;ENSMMUP00000001018	ENSMMUP00000001016	yes	no	2	0.0052561	81.338	1			1			3856200	3856200	0	0
19837	172	NNDALDAALFYLSMK	15	0	1684.81	ENSMMUP00000001016;ENSMMUP00000001018	ENSMMUP00000001016	yes	no	2	3.9817e-05	119.56			1			1	225810	0	0	225810
26975	172	VLSSHLMHSSLPGLTR	16	0	1733.92	ENSMMUP00000001016;ENSMMUP00000001018	ENSMMUP00000001016	yes	no	4	0.00082058	85.42	1			1			2806900	2806900	0	0
1181	173	ALEILQEEDLIDEDDIPVR	19	0	2224.11	ENSMMUP00000001017	ENSMMUP00000001017	yes	yes	2,3	4.0398e-17	161.08	4	3	5	4	3	5	241110000	58979000	108440000	73688000
2162	173	AVGSGATFSHYYYMILSR	18	0	2021.97	ENSMMUP00000001017	ENSMMUP00000001017	yes	yes	2,3	4.7235e-27	189.59		4			4		59557000	0	59557000	0
2734	173	DFALLSLQVPLK	12	0	1342.79	ENSMMUP00000001017	ENSMMUP00000001017	yes	yes	2	3.428e-14	162.49	2	3	4	2	3	4	8754200	542620	2942700	5268800
2735	173	DFALLSLQVPLKDVK	15	1	1684.98	ENSMMUP00000001017	ENSMMUP00000001017	yes	yes	3	0.004441	80.905		1	2		1	2	7097200	0	1600900	5496300
4408	173	DVYLPSSIFQDDFVIPDISEPGTWK	25	0	2867.39	ENSMMUP00000001017	ENSMMUP00000001017	yes	yes	2,3	1.5489e-45	163.91	7	7	9	7	7	9	368840000	92778000	151190000	124870000
5178	173	EGAIHTEELVYELNPLDHR	19	0	2234.1	ENSMMUP00000001017	ENSMMUP00000001017	yes	yes	2,3,4	3.4609e-97	239.86	14	14	13	14	14	13	929800000	385630000	274970000	269200000
6197	173	EPFLSCCQFAESLR	14	0	1742.78	ENSMMUP00000001017	ENSMMUP00000001017	yes	yes	2	1.9204e-11	162.48	2	1		2	1		37715000	23726000	13989000	0
7152	173	FEQLELRPVLYNYLAR	16	1	2023.09	ENSMMUP00000001017	ENSMMUP00000001017	yes	yes	2,3	7.4309e-07	154.72	6	6	6	6	6	6	821020000	280600000	253370000	287040000
9177	173	GHLFLQTDQPIYNPGQR	17	0	1983	ENSMMUP00000001017	ENSMMUP00000001017	yes	yes	2,3	3.251e-56	222.42	9	9	11	9	9	11	563710000	225590000	180660000	157460000
9432	173	GLCVAAPVQLR	11	0	1182.65	ENSMMUP00000001017	ENSMMUP00000001017	yes	yes	2	0.0025935	91.584	1	1		1	1		8961300	3360500	5600800	0
9797	173	GPEVQLVAQSPWLK	14	0	1550.85	ENSMMUP00000001017	ENSMMUP00000001017	yes	yes	2,3	8.8628e-66	225.86	3	6	4	3	6	4	275540000	70879000	118600000	86058000
10027	173	GSFDFPVGDAVSK	13	0	1324.63	ENSMMUP00000001017	ENSMMUP00000001017	yes	yes	2	3.794e-06	133.15	2	1	1	2	1	1	118100000	56415000	48988000	12695000
10977	173	HLVPGAPFLLQALVR	15	0	1629.97	ENSMMUP00000001017	ENSMMUP00000001017	yes	yes	2,3	1.4095e-30	197.3	70	43	54	70	43	54	195110000	56779000	100860000	37471000
13449	173	KDVYLPSSIFQDDFVIPDISEPGTWK	26	1	2995.49	ENSMMUP00000001017	ENSMMUP00000001017	yes	yes	3	2.9528e-15	113.42	3	2	3	3	2	3	57443000	18408000	12563000	26472000
13828	173	KKDVYLPSSIFQDDFVIPDISEPGTWK	27	2	3123.58	ENSMMUP00000001017	ENSMMUP00000001017	yes	yes	3,4	2.0732e-17	113.31	3	5		3	5		85547000	47035000	38512000	0
14316	173	KTNIQGVNLLFSSR	14	1	1575.87	ENSMMUP00000001017	ENSMMUP00000001017	yes	yes	2,3	1.0466e-15	171.08	10	10	7	10	10	7	450560000	271410000	101250000	77897000
14515	173	KYVLPNFEVK	10	1	1235.69	ENSMMUP00000001017	ENSMMUP00000001017	yes	yes	2,3	9.1746e-07	155.06	2	2	4	2	2	4	18491000	7106500	3229600	8154800
15760	173	LHLETDSPALVALGALDTALYAAGSK	26	0	2596.37	ENSMMUP00000001017	ENSMMUP00000001017	yes	yes	2,3	7.5428e-58	177.03	6	7	8	6	7	8	186350000	45393000	70088000	70867000
16702	173	LNMGMTDLLGLR	12	0	1332.69	ENSMMUP00000001017;ENSMMUP00000034007	ENSMMUP00000001017	yes	no	2	1.4749e-69	233.32	5	8	5	5	8	5	462640000	152400000	170100000	140150000
17638	173	LTVAAPPSGGPGFLSIERPDSRPPR	25	2	2573.37	ENSMMUP00000001017	ENSMMUP00000001017	yes	yes	3	0.009642	65.887	2	1	1	2	1	1	132470000	57373000	25785000	49308000
20691	173	PVAFSVVPTAAAAVSLK	17	0	1626.93	ENSMMUP00000001017	ENSMMUP00000001017	yes	yes	2,3	2.7166e-05	119.54	2	3	2	2	3	2	62197000	14948000	30615000	16635000
21560	173	RFEQLELRPVLYNYLAR	17	2	2179.19	ENSMMUP00000001017	ENSMMUP00000001017	yes	yes	2,3,4	0.0011208	125.22	9	4	6	9	4	6	232920000	86258000	107120000	39539000
21642	173	RGHLFLQTDQPIYNPGQR	18	1	2139.1	ENSMMUP00000001017	ENSMMUP00000001017	yes	yes	2,3,4	1.0221e-18	172.82	6	6	6	6	6	6	981300000	474240000	188280000	318770000
24963	173	TLEIPGNSDPNMIPDGDFNSYVR	23	0	2550.17	ENSMMUP00000001017	ENSMMUP00000001017	yes	yes	2	1.1926e-07	102.43	2	2	3	2	2	3	84043000	24446000	31224000	28372000
25178	173	TNIQGVNLLFSSR	13	0	1447.78	ENSMMUP00000001017	ENSMMUP00000001017	yes	yes	2	6.1864e-07	135.81	2	2	2	2	2	2	66402000	17106000	26169000	23127000
25964	173	VDFTLSSDRDFALLSLQVPLK	21	1	2363.27	ENSMMUP00000001017	ENSMMUP00000001017	yes	yes	3	0.010934	59.585	2			2			10879000	10879000	0	0
25965	173	VDFTLSSDRDFALLSLQVPLKDVK	24	2	2705.46	ENSMMUP00000001017	ENSMMUP00000001017	yes	yes	3	0.051847	57.068	1	1		1	1		32716000	19251000	13465000	0
26373	173	VGDTLNLNLR	10	0	1113.61	ENSMMUP00000001017	ENSMMUP00000001017	yes	yes	2	9.2582e-05	125.75	1	1	1	1	1	1	11977000	1993000	6327400	3657100
27433	173	VSATVSSPGSVPEVR	15	0	1470.77	ENSMMUP00000001017	ENSMMUP00000001017	yes	yes	2	7.2836e-05	109.07	1	1		1	1		2828900	810750	2018200	0
29053	173	YIYGKPVQGVAYVR	14	1	1611.88	ENSMMUP00000001017	ENSMMUP00000001017	yes	yes	3	1.6233e-06	141.08	3	2	1	3	2	1	14091000	11721000	1951300	419040
29099	173	YLDKTEQWSALPPETK	16	1	1904.95	ENSMMUP00000001017	ENSMMUP00000001017	yes	yes	2,3	4.4938e-30	191.37	9	5	3	9	5	3	192670000	86991000	56247000	49427000
29622	173	YVLPNFEVK	9	0	1107.6	ENSMMUP00000001017	ENSMMUP00000001017	yes	yes	2	0.0021601	105.4	1	2		1	2		43537000	4383800	39153000	0
691	174	AGDEAVFAQYDSFR	14	0	1574.7	ENSMMUP00000001024	ENSMMUP00000001024	yes	yes	2	3.8663e-23	189.86	3	3	3	3	3	3	37837000	12404000	18601000	6831900
3633	174	DLRPGTLYSLTLYGLR	16	1	1837.01	ENSMMUP00000001024	ENSMMUP00000001024	yes	yes	2,3	3.9631e-30	192.65	2	3	3	2	3	3	26104000	11338000	7393300	7372000
6379	174	ERPLNVFCDMETDGGGWLVFQR	22	1	2625.21	ENSMMUP00000001024	ENSMMUP00000001024	yes	yes	3	1.3558e-24	149.95			1			1	1738300	0	0	1738300
7345	174	FGVPSPSTLEPHPR	14	0	1519.78	ENSMMUP00000001024	ENSMMUP00000001024	yes	yes	3	0.015852	62.694	2	1	2	2	1	2	16962000	6990800	2265400	7706300
7639	174	FLLYGLVGGK	10	0	1065.62	ENSMMUP00000001024	ENSMMUP00000001024	yes	yes	2	0.0025654	92.062	5	5	3	5	5	3	16853000	8232200	5132300	3488300
8871	174	GFEFSVPFTEMK	12	0	1417.66	ENSMMUP00000001024	ENSMMUP00000001024	yes	yes	2	1.181e-07	146.16	5	5	4	5	5	4	88800000	29925000	33007000	25868000
15633	174	LGPLSAEGTTGPAPAGQTSGEPGPR	25	0	2304.13	ENSMMUP00000001024	ENSMMUP00000001024	yes	yes	2,3	2.2267e-27	139.04	1	1		1	1		23103000	7754400	15349000	0
15691	174	LGVLAVTDTAPDSMR	15	0	1544.79	ENSMMUP00000001024	ENSMMUP00000001024	yes	yes	2	0.0010676	81.448		1			1		8930000	0	8930000	0
15758	174	LHLEGYHGTAGDSMSYHSGSVFSAR	25	0	2665.2	ENSMMUP00000001024	ENSMMUP00000001024	yes	yes	2,3,4,5	6.0255e-21	125.45	4	3	1	4	3	1	59900000	44508000	10883000	4509200
16756	174	LNWEAPPGAFDSFLLR	16	0	1831.93	ENSMMUP00000001024	ENSMMUP00000001024	yes	yes	2,3	1.469e-31	200.77	6	5	6	6	5	6	172590000	53989000	69232000	49367000
17007	174	LQAMWGESLLPPVSTSFTTGGLR	23	0	2447.25	ENSMMUP00000001024	ENSMMUP00000001024	yes	yes	2,3	1.3343e-07	100.94	7	3	4	7	3	4	23676000	8541400	7289500	7844700
17412	174	LSQLSVTDVTTSSLR	15	0	1605.86	ENSMMUP00000001024	ENSMMUP00000001024	yes	yes	2	3.2434e-10	160.8	1	1	1	1	1	1	32303000	9374500	12412000	10517000
24365	174	TALLTWTEPQVRPTGYLLSFDTPGGR	26	1	2875.49	ENSMMUP00000001024	ENSMMUP00000001024	yes	yes	3	3.5201e-21	130.87	1	1	1	1	1	1	25999000	7681700	9438600	8878400
25326	174	TQEILLPGGVTSHQLLGLFPSTLYNAR	27	0	2924.58	ENSMMUP00000001024	ENSMMUP00000001024	yes	yes	3	1.3721e-05	74.876	1	1		1	1		13457000	8191200	5266200	0
27582	174	VSYQLADGGEPQSVQVDGR	19	0	2003.95	ENSMMUP00000001024	ENSMMUP00000001024	yes	yes	2	1.7108e-05	93.776	1	2		1	2		17237000	5435800	11802000	0
6004	177	EMAHGSQEAEAPGAVAGAAEVPREPPALPR	30	1	2994.46	ENSMMUP00000001049	ENSMMUP00000001049	yes	yes	4	0.011766	45.126	1	1	1	1	1	1	20096000	6710400	10339000	3046800
6170	177	ENYTWSQDYTDLEVR	15	0	1917.84	ENSMMUP00000001049	ENSMMUP00000001049	yes	yes	2	2.9474e-31	201.16	3	3	2	3	3	2	69281000	34467000	25044000	9770800
7064	177	FDPAMFNISPGAVQF	15	0	1639.77	ENSMMUP00000001049	ENSMMUP00000001049	yes	yes	2	1.558e-05	139.3	2	2	2	2	2	2	18185000	3965800	9494000	4725200
18408	177	MGFPPGAAQALVLQVFK	17	0	1772.96	ENSMMUP00000001049	ENSMMUP00000001049	yes	yes	2,3	2.8849e-11	164.2	7	5	6	7	5	6	35631000	12527000	8423800	14680000
26392	177	VGEYWWNAILEGEEPIDIDK	20	0	2375.13	ENSMMUP00000001049	ENSMMUP00000001049	yes	yes	2,3	5.922e-53	203.26	8	5	5	8	5	5	119890000	40585000	36313000	42992000
26393	177	VGEYWWNAILEGEEPIDIDKINK	23	1	2730.35	ENSMMUP00000001049	ENSMMUP00000001049	yes	yes	2,3	3.3425e-31	163.53	4	3	2	4	3	2	35912000	12397000	17355000	6159500
26793	177	VLFGFLYR	8	0	1013.57	ENSMMUP00000001049	ENSMMUP00000001049	yes	yes	2	1.3037e-06	162.51	1	1	1	1	1	1	1828500	630080	653290	545090
515	178	AESPTFPYLNTLLR	14	0	1620.85	ENSMMUP00000001068;ENSMMUP00000001070;ENSMMUP00000001076	ENSMMUP00000001068	yes	no	2	0.00017225	106.58		2	1		2	1	8501600	0	4915400	3586100
7380	178	FHMDSETHDPIDLQTK	16	0	1912.86	ENSMMUP00000001068;ENSMMUP00000001070;ENSMMUP00000001076	ENSMMUP00000001068	yes	no	3,4	0.00093915	83.692	2		1	2		1	15136000	12496000	0	2640000
12133	178	IIFSEHLPLSK	11	0	1282.73	ENSMMUP00000001068;ENSMMUP00000001070;ENSMMUP00000001076	ENSMMUP00000001068	yes	no	3	0.022884	63.32	3			3			3768600	3768600	0	0
2049	179	ATNELIWLNEKEEEEVAYDWSER	23	1	2852.31	ENSMMUP00000001071;ENSMMUP00000001047;ENSMMUP00000001067	ENSMMUP00000001071	no	no	3	7.3859e-19	140.63	1	1	1				6348000	1908900	1565900	2873200
2392	179	CFLDVQESVTTQVER	15	0	1809.86	ENSMMUP00000001071	ENSMMUP00000001071	yes	yes	2	0.1269	38.511		1			1		11645000	0	11645000	0
3762	179	DMTDISHDYEDLGLLLK	17	0	1976.94	ENSMMUP00000001071;ENSMMUP00000001047;ENSMMUP00000001067	ENSMMUP00000001071	no	no	3	9.7475e-05	102.52		1					1148600	0	1148600	0
5040	179	EFANFDFDIWR	11	0	1458.66	ENSMMUP00000001071;ENSMMUP00000001047;ENSMMUP00000001067	ENSMMUP00000001071	no	no	2	0.0011029	101.39	1						852450	852450	0	0
7989	179	FQVEQIGDNK	10	0	1176.58	ENSMMUP00000001071;ENSMMUP00000001047;ENSMMUP00000001067	ENSMMUP00000001071	no	no	2	0.057197	56.548			1				964260	0	0	964260
8935	179	GFHGEIEDLQQWLTDTER	18	0	2173.01	ENSMMUP00000001071;ENSMMUP00000001047;ENSMMUP00000001067;ENSMMUP00000012516	ENSMMUP00000001071	no	no	2,3	1.9364e-59	214.46	2	2	2				13021000	2865600	7557000	2597900
11747	179	IENLLDWLSNVDKDSER	17	1	2045.01	ENSMMUP00000001071;ENSMMUP00000001047;ENSMMUP00000001067	ENSMMUP00000001071	no	no	3	0.00077429	96.591	1		1				3841000	2115500	0	1725500
11843	179	IFGEDEVELMNWLNEVHDK	19	0	2316.07	ENSMMUP00000001071;ENSMMUP00000001047;ENSMMUP00000001067;ENSMMUP00000012516	ENSMMUP00000001071	no	no	3	1.275e-09	132.51	2	1	2				7676600	2312700	2485700	2878200
15076	179	LEEQISQHK	9	0	1110.57	ENSMMUP00000001071;ENSMMUP00000001047;ENSMMUP00000001067;ENSMMUP00000012516	ENSMMUP00000001071	no	no	2	0.019494	72.928	1	1					8020900	4045000	3975900	0
15188	179	LEQDQTSAQLQVQK	14	0	1614.82	ENSMMUP00000001071;ENSMMUP00000001047;ENSMMUP00000001067;ENSMMUP00000012516	ENSMMUP00000001071	no	no	2	0.0083098	68.171	1	1	1				7128800	2207700	3526500	1394500
20658	179	PSLILDTVLFQIDEHK	16	0	1867.01	ENSMMUP00000001071;ENSMMUP00000001047;ENSMMUP00000001067	ENSMMUP00000001071	no	no	3	0.10463	39.746	1						697380	697380	0	0
22808	179	SHGLIDEQILCQLK	14	0	1652.86	ENSMMUP00000001071	ENSMMUP00000001071	yes	yes	3	0.046517	52.576	1		1	1		1	2289200	1248500	0	1040700
23093	179	SLDSELEIANDPDK	14	0	1544.72	ENSMMUP00000001071;ENSMMUP00000001047;ENSMMUP00000001067;ENSMMUP00000033509	ENSMMUP00000001071	no	no	2	0.11293	41.996		1					5596200	0	5596200	0
24105	179	SVITYVSSLYDAFPK	15	0	1688.87	ENSMMUP00000001071;ENSMMUP00000001047	ENSMMUP00000001071	no	no	2	0.028662	98.676		1					3973400	0	3973400	0
24171	179	SVVSWHYLINEIDR	14	0	1729.88	ENSMMUP00000001071;ENSMMUP00000001047;ENSMMUP00000001067	ENSMMUP00000001071	no	no	2,3	3.9183e-07	141.34	2	2	1				6752100	1417300	4362100	972690
25441	179	TSLADDNLKLDDMLSELR	18	1	2048.01	ENSMMUP00000001071;ENSMMUP00000001047;ENSMMUP00000001067;ENSMMUP00000033509	ENSMMUP00000001071	no	no	3	0.044943	57.148		1	1				3739100	0	2234700	1504400
3445	180	DLGEGEEAELAPPEDLLGRPQALSR	25	1	2661.32	ENSMMUP00000001077	ENSMMUP00000001077	yes	yes	3	0.024515	48.244		1			1		2097200	0	2097200	0
15182	180	LEPLLMQLDYSMK	13	0	1579.8	ENSMMUP00000001077	ENSMMUP00000001077	yes	yes	2	0.0035392	78.505		1			1		1034400	0	1034400	0
17242	180	LRGWEAVLAAAQR	13	1	1439.8	ENSMMUP00000001077	ENSMMUP00000001077	yes	yes	3	0.0010577	109.24	2	2	1	2	2	1	4574400	1547100	2098700	928630
4734	181	EATSVPGFPAEGAIALPVDFLSR	23	0	2343.21	ENSMMUP00000001080;ENSMMUP00000005513	ENSMMUP00000001080	yes	no	2,3	1.032e-06	83.849		1	1		1	1	1623700	0	1025500	598220
24022	181	STPTAEDVTAPLVDER	16	0	1699.83	ENSMMUP00000001080;ENSMMUP00000005513;ENSMMUP00000005519;ENSMMUP00000005517	ENSMMUP00000001080	yes	no	3	0.12541	36.928	1			1			18541000	18541000	0	0
2738	182	DFASFPSINLQQMLNEVPK	19	0	2177.08	ENSMMUP00000001085;ENSMMUP00000036718	ENSMMUP00000001085	yes	no	2,3	5.8589e-41	198.51	10	6	10	10	6	10	226620000	43871000	101790000	80950000
2739	182	DFASFPSINLQQMLNEVPKR	20	1	2333.18	ENSMMUP00000001085;ENSMMUP00000036718	ENSMMUP00000001085	yes	no	2,3,4	4.776e-11	136.26	5	4	4	5	4	4	148450000	50890000	54483000	43077000
4394	182	DVVLPTYDITHSTLEAMR	18	0	2060.02	ENSMMUP00000001085;ENSMMUP00000036718	ENSMMUP00000001085	yes	no	2,3	2.0829e-06	119.68	3	6	5	3	6	5	92582000	12404000	40488000	39690000
8499	182	GAIVHYTILDNHIYR	15	0	1783.94	ENSMMUP00000001085;ENSMMUP00000036718	ENSMMUP00000001085	yes	no	2,3,4	8.0815e-22	181.71	5	3	3	5	3	3	235480000	93486000	60925000	81067000
11804	182	IEVLYGDEHVAQSPYILK	18	0	2073.08	ENSMMUP00000001085;ENSMMUP00000036718	ENSMMUP00000001085	yes	no	2,3	1.4861e-05	106.67	4	5	5	4	5	5	72154000	26665000	24831000	20658000
16582	182	LMGFFDFFK	9	0	1150.55	ENSMMUP00000001085;ENSMMUP00000036718	ENSMMUP00000001085	yes	no	2	0.027631	83.948	1			1			61334	61334	0	0
18380	182	MFSDEILLSLTR	12	0	1423.74	ENSMMUP00000001085;ENSMMUP00000036718	ENSMMUP00000001085	yes	no	2	6.0038e-45	203.61	2	1	1	2	1	1	28724000	15277000	4433400	9013000
20833	182	QDSPYYEHFYMALEPWK	17	0	2202.97	ENSMMUP00000001085;ENSMMUP00000036718	ENSMMUP00000001085	yes	no	2,3	8.1763e-08	153.95	2	1	5	2	1	5	45214000	4681200	14422000	26111000
23363	182	SLVWGPGLQAAVVLPVR	17	0	1761.03	ENSMMUP00000001085	ENSMMUP00000001085	yes	yes	2,3	2.4999e-33	201.3	6	5	5	6	5	5	54375000	16769000	23442000	14164000
29379	182	YPYLMLGDSLVLK	13	0	1510.81	ENSMMUP00000001085;ENSMMUP00000036718	ENSMMUP00000001085	yes	no	2	2.3312e-14	164.11	3	3	3	3	3	3	83754000	30645000	25913000	27196000
29435	182	YQVNVDGTVAAYR	13	0	1454.72	ENSMMUP00000001085;ENSMMUP00000036718	ENSMMUP00000001085	yes	no	2	5.3414e-20	179.93	2	2	2	2	2	2	16239000	2711600	5759300	7768500
5229	183	EGHPVYPQLRPGYIPIPVLHEGAENR	26	1	2937.53	ENSMMUP00000001088	ENSMMUP00000001088	yes	yes	3,4,5	3.5261e-11	101.75	2	1	2	2	1	2	71528000	21989000	5038400	44500000
5806	183	ELLALDSVDPEGR	13	0	1412.71	ENSMMUP00000001088	ENSMMUP00000001088	yes	yes	2	9.2815e-06	128.54		1	1		1	1	11819000	0	5648000	6170600
11646	183	IDPQTGWPFFVDHNSR	16	0	1914.9	ENSMMUP00000001088	ENSMMUP00000001088	yes	yes	2	0.0365	50.608		2			2		6980900	0	6980900	0
29159	183	YLMIEEYLTK	10	0	1301.66	ENSMMUP00000001088	ENSMMUP00000001088	yes	yes	2	0.0015878	98.04		2	3		2	3	4907300	0	1228700	3678600
2214	184	AVPLALALISVSNPR	15	0	1519.91	ENSMMUP00000001091;ENSMMUP00000001090	ENSMMUP00000001091	yes	no	2,3	4.1832e-05	113.35	3	2	2	3	2	2	18975000	9254000	3571200	6149700
4229	184	DTSLYRPALEELRR	14	2	1717.91	ENSMMUP00000001091	ENSMMUP00000001091	yes	yes	2,3	0.011119	96.059	2			2			153650000	153650000	0	0
4891	184	EDVLTLLLPVMGDSK	15	0	1628.87	ENSMMUP00000001091;ENSMMUP00000001090	ENSMMUP00000001091	yes	no	2,3	2.9595e-41	211.51	12	13	12	12	13	12	350550000	65023000	150340000	135180000
6889	184	FAADIISVLAMTMSGER	17	0	1810.9	ENSMMUP00000001091	ENSMMUP00000001091	yes	yes	2,3	1.9268e-144	268.93	3	10	2	3	10	2	8898300	1177000	7156100	565250
8059	184	FSHDADPEVSYNSIFAMGMVGSGTNNAR	28	0	2973.3	ENSMMUP00000001091;ENSMMUP00000001090	ENSMMUP00000001091	yes	no	3	9.1218e-29	129.29	5	6	2	5	6	2	111690000	42110000	53382000	16198000
16493	184	LLTDDGNKWLYK	12	1	1464.76	ENSMMUP00000001091;ENSMMUP00000001090	ENSMMUP00000001091	yes	no	2,3	0.0025854	101.39	2	3		2	3		25475000	11948000	13527000	0
16672	184	LNILDTLSK	9	0	1015.59	ENSMMUP00000001091;ENSMMUP00000001090	ENSMMUP00000001091	yes	no	2	0.10967	51.092			1			1	882450	0	0	882450
17723	184	LVGSQEELASWGHEYVR	17	0	1958.95	ENSMMUP00000001091	ENSMMUP00000001091	yes	yes	2,3	1.2807e-05	137.81	5	5	5	5	5	5	586140000	216090000	215970000	154080000
18627	184	MLVTFDEELRPLPVSVR	17	1	2000.08	ENSMMUP00000001091;ENSMMUP00000001090	ENSMMUP00000001091	yes	no	2,3	0.00018664	110.38	7	7	7	7	7	7	239040000	76709000	67463000	94869000
18682	184	MNLASSFVNGFVNAAFGQDK	20	0	2116	ENSMMUP00000001091	ENSMMUP00000001091	yes	yes	2,3	2.5109e-32	187.47	8	5	7	8	5	7	77215000	30736000	16695000	29785000
19200	184	NECDPALALLSDYVLHNSNTMR	22	0	2532.17	ENSMMUP00000001091;ENSMMUP00000001090	ENSMMUP00000001091	yes	no	3	2.1732e-12	126.22	2	3	2	2	3	2	138870000	35186000	48052000	55633000
22645	184	SGALLACGIVNSGVR	15	0	1472.78	ENSMMUP00000001091;ENSMMUP00000001090	ENSMMUP00000001091	yes	no	2	5.4189e-05	111.64	1	1		1	1		17384000	1161600	16223000	0
22841	184	SHYVLYGLVAAMQPR	15	0	1703.88	ENSMMUP00000001091;ENSMMUP00000001090	ENSMMUP00000001091	yes	no	2,3	9.5939e-23	190.03	4	1	4	4	1	4	20308000	11949000	3221300	5137700
27377	184	VQQLLHICSEHFDSK	15	0	1839.89	ENSMMUP00000001091;ENSMMUP00000001090	ENSMMUP00000001091	yes	no	4	0.056364	47.621	1			1			307650	307650	0	0
28299	184	WLPLGLGLNHLGK	13	0	1416.82	ENSMMUP00000001091;ENSMMUP00000001090	ENSMMUP00000001091	yes	no	2,3	1.5145e-10	148.28	5	4	3	5	4	3	51018000	32355000	9126300	9536200
1758	186	AQPEQGEPALVTPVESQQHEIESR	24	0	2658.29	ENSMMUP00000001096	ENSMMUP00000001096	yes	yes	3	0.0067316	49.577		1	1		1	1	21609000	0	14865000	6743700
17633	186	LTTLIELLLPK	11	0	1252.8	ENSMMUP00000001096	ENSMMUP00000001096	yes	yes	2	1.4696e-18	176.95	3	1	2	3	1	2	2976000	1452000	851130	672860
24514	186	TEDPLLSWADFTK	13	0	1521.74	ENSMMUP00000001096	ENSMMUP00000001096	yes	yes	2	1.964e-06	134.68	3	2	3	3	2	3	35785000	10044000	9628500	16112000
24515	186	TEDPLLSWADFTKR	14	1	1677.84	ENSMMUP00000001096	ENSMMUP00000001096	yes	yes	3	0.0077182	72.496	1	1	1	1	1	1	5052900	3138000	1174800	740150
18889	187	MTEEEVEMLVAGHEDSNGCINYEELVR	27	0	3152.37	ENSMMUP00000001102;ENSMMUP00000013787	ENSMMUP00000001102	yes	no	3	8.9783e-18	106.43		1	1		1	1	9865500	0	6846100	3019500
5364	188	EHLIDELDYVLVPTEAWNK	19	0	2283.14	ENSMMUP00000001114;ENSMMUP00000001115	ENSMMUP00000001114	yes	no	2,3	1.0727e-40	195.46	7	5	6	7	5	6	84172000	43864000	18253000	22055000
8766	188	GEIAEAYAELIK	12	0	1305.68	ENSMMUP00000001114;ENSMMUP00000001115;ENSMMUP00000039257	ENSMMUP00000001114	yes	no	2	0.1894	44.426	1			1			1314500	1314500	0	0
13548	188	KFDLWSLPK	9	1	1132.63	ENSMMUP00000001114;ENSMMUP00000001115;ENSMMUP00000039257	ENSMMUP00000001114	yes	no	2,3	0.0013556	123.63	2	3	2	2	3	2	10454000	3864300	3694700	2894800
17253	188	LRNDSVIVDTFHGLFK	16	1	1859.99	ENSMMUP00000001114;ENSMMUP00000001115;ENSMMUP00000039257	ENSMMUP00000001114	yes	no	2,3,4	3.6808e-15	176.4	4	4	3	4	4	3	46868000	9106300	28213000	9548800
27700	188	VTVPLMGAVSDLCEALSR	18	0	1916.97	ENSMMUP00000001114;ENSMMUP00000001115;ENSMMUP00000039257	ENSMMUP00000001114	yes	no	3	0.054455	72.583	1			1			248900	248900	0	0
802	189	AGQTVTIWAANAGVTASPPTDLIWK	25	0	2567.34	ENSMMUP00000001116	ENSMMUP00000001116	yes	yes	2,3	6.9337e-28	144.57	3	2	3	3	2	3	82711000	20619000	30296000	31796000
3991	189	DQMQQQLNDYEQLLDVK	17	0	2106.99	ENSMMUP00000001116	ENSMMUP00000001116	yes	yes	2,3	7.8989e-104	248.13	5	6	5	5	6	5	321200000	69188000	147660000	104350000
6003	189	EMAEIRDQMQQQLNDYEQLLDVK	23	1	2836.34	ENSMMUP00000001116	ENSMMUP00000001116	yes	yes	2,3	7.3135e-69	207.76	7	10	3	7	10	3	463840000	187010000	219760000	57068000
11774	189	IESLSSQLSNLQK	13	0	1445.77	ENSMMUP00000001116	ENSMMUP00000001116	yes	yes	2,3	1.8727e-66	225.33	2	2	1	2	2	1	76922000	15018000	35065000	26838000
12729	189	IQELEDMLAK	10	0	1188.61	ENSMMUP00000001116	ENSMMUP00000001116	yes	yes	2	0.0061596	83.862	1	1	1	1	1	1	37193000	12344000	18441000	6407400
14254	189	KRVDVEESEASSSVSISHSASATGNVCIEEIDVDGK	36	2	3790.78	ENSMMUP00000001116	ENSMMUP00000001116	yes	yes	5	0.038823	39.343			1			1	1400600	0	0	1400600
14280	189	KSLEGDLEDLKDQIAQLEASLAAAK	25	2	2655.4	ENSMMUP00000001116	ENSMMUP00000001116	yes	yes	3,4	8.7141e-13	110.57	2	3	2	2	3	2	44857000	8022900	29234000	7599700
14638	189	LALDMEISAYR	11	0	1280.64	ENSMMUP00000001116	ENSMMUP00000001116	yes	yes	2	0.0003021	116.55	5	7	7	5	7	7	105550000	30376000	46351000	28825000
14639	189	LALDMEISAYRK	12	1	1408.74	ENSMMUP00000001116	ENSMMUP00000001116	yes	yes	2,3	0.0044957	84.169	4			4			38377000	38377000	0	0
16039	189	LKNTSEQDQPMGGWEMIR	18	1	2118.98	ENSMMUP00000001116	ENSMMUP00000001116	yes	yes	2,3	1.9146e-59	221.79	8	6	3	8	6	3	558010000	329300000	149030000	79688000
17424	189	LSSEMNTSTVNSAREELMESR	21	1	2370.08	ENSMMUP00000001116	ENSMMUP00000001116	yes	yes	3	0.00053686	77.468		1			1		17090000	0	17090000	0
18154	189	MATATPVPPR	10	0	1039.55	ENSMMUP00000001116	ENSMMUP00000001116	yes	yes	2	0.13924	37.344	1			1			0	0	0	0
18805	189	MRIESLSSQLSNLQK	15	1	1732.91	ENSMMUP00000001116	ENSMMUP00000001116	yes	yes	2,3	2.044e-21	185.14	3	3	1	3	3	1	72919000	45741000	26097000	1081200
20175	189	NTSEQDQPMGGWEMIR	16	0	1877.8	ENSMMUP00000001116	ENSMMUP00000001116	yes	yes	2	1.5811e-84	246.03	4	8	4	4	8	4	722320000	188590000	335550000	198190000
23119	189	SLEGDLEDLKDQIAQLEASLAAAK	24	1	2527.3	ENSMMUP00000001116	ENSMMUP00000001116	yes	yes	3,4	6.0934e-39	164.94	3	1		3	1		5322800	5022800	299970	0
23129	189	SLETENSALQLQVTER	16	0	1816.92	ENSMMUP00000001116	ENSMMUP00000001116	yes	yes	2	1.2658e-164	288.42	2	5	3	2	5	3	186350000	45721000	81234000	59397000
23130	189	SLETENSALQLQVTEREEVR	20	1	2330.17	ENSMMUP00000001116	ENSMMUP00000001116	yes	yes	3	6.7238e-05	108.89	4	5	1	4	5	1	85331000	31026000	47584000	6720400
25527	189	TTIPEEEEEEEEAAGVVVEEELFHQQGTPR	30	0	3410.56	ENSMMUP00000001116	ENSMMUP00000001116	yes	yes	2,3,4	3.0701e-76	175.93	18	28	27	18	28	27	5353700000	1399400000	2090300000	1864000000
1925	190	ASSAAAPHTVSYPDNLTYR	19	0	2019.96	ENSMMUP00000001118	ENSMMUP00000001118	yes	yes	3	0.00097364	69.979	1	1	1	1	1	1	8636300	7199100	817910	619270
17039	190	LQDSLFSSDSGFNNYR	16	0	1848.83	ENSMMUP00000001118;ENSMMUP00000031852	ENSMMUP00000001118	yes	no	2	2.5844e-41	207.55	2	1	1	2	1	1	2640600	0	1558700	1081900
5061	192	EFENSYIFDINTIDR	15	0	1874.87	ENSMMUP00000001121;ENSMMUP00000001122;ENSMMUP00000034752	ENSMMUP00000001121	yes	no	2	0.0011644	80.738	1			1			3098800	3098800	0	0
14984	192	LDTIPDIPPPRPPKPHPAHDR	21	2	2365.27	ENSMMUP00000001121;ENSMMUP00000001122;ENSMMUP00000034752	ENSMMUP00000001121	yes	no	3	0.010922	69.522			1			1	1241800	0	0	1241800
17540	192	LTGDPDVLEYYK	12	0	1411.69	ENSMMUP00000001121;ENSMMUP00000001122;ENSMMUP00000034752	ENSMMUP00000001121	yes	no	2	0.089279	46.159		1			1		4081700	0	4081700	0
26701	192	VKPAPLEIKPLPEWEELQAPVR	22	2	2538.42	ENSMMUP00000001121;ENSMMUP00000001122;ENSMMUP00000034752	ENSMMUP00000001121	yes	no	4	0.015282	67.418			1			1	12379000	0	0	12379000
7562	193	FLEEYLSSTPQR	12	0	1468.72	ENSMMUP00000001123	ENSMMUP00000001123	yes	yes	2	1.2292e-09	151.55	1	2	3	1	2	3	70811000	30772000	29090000	10949000
18815	193	MSASVVSVISRFLEEYLSSTPQR	23	1	2585.32	ENSMMUP00000001123	ENSMMUP00000001123	yes	yes	3	0.10982	48.824			1			1	3927800	0	0	3927800
6409	194	ESEITDEDIDGILER	15	0	1732.8	ENSMMUP00000001125	ENSMMUP00000001125	yes	yes	2	1.4878e-05	139.66	1	1		1	1		7343500	2052600	5290900	0
7094	194	FDWFLK	6	0	854.433	ENSMMUP00000001125	ENSMMUP00000001125	yes	yes	2	0.014791	138.38	3	3	4	3	3	4	25111000	10305000	10042000	4765200
11453	194	IAFTEWIEPPKR	12	1	1485.8	ENSMMUP00000001125	ENSMMUP00000001125	yes	yes	2,3	3.0394e-09	147.91	2	2	1	2	2	1	34370000	12865000	17628000	3877300
11972	194	IGKDEMLQMIR	11	1	1332.69	ENSMMUP00000001125	ENSMMUP00000001125	yes	yes	3	0.0031082	104.79		3	4		3	4	22321000	0	5830800	16490000
15502	194	LGFDKENVYDELR	13	1	1596.78	ENSMMUP00000001125	ENSMMUP00000001125	yes	yes	2,3	4.8972e-10	150.11	3	1	2	3	1	2	35932000	18796000	7138300	9998300
19336	194	NFTMDTESSVYNFEGEDYREK	21	1	2560.07	ENSMMUP00000001125	ENSMMUP00000001125	yes	yes	3	0.10733	45.916		1			1		7155200	0	7155200	0
25225	194	TPEEVIEYSAVFWER	15	0	1853.88	ENSMMUP00000001125	ENSMMUP00000001125	yes	yes	2	4.4527e-07	150.37	1	1	2	1	1	2	13615000	4380700	4950300	4284400
26749	194	VLDILEDYCMWR	12	0	1611.74	ENSMMUP00000001125	ENSMMUP00000001125	yes	yes	2	1.2636e-06	137.16	1		1	1		1	3200200	1555900	0	1644300
28177	194	WGRDDIENIAR	11	1	1343.66	ENSMMUP00000001125	ENSMMUP00000001125	yes	yes	3	0.00071562	123.75	1	1		1	1		1221800	1221800	0	0
6679	196	EVHEIDESLIFYK	13	0	1620.8	ENSMMUP00000001129	ENSMMUP00000001129	yes	yes	2,3	1.4112e-18	174.73	4	2	3	4	2	3	44211000	19779000	9227800	15204000
12822	196	IRPFLGGAPTEDVK	14	1	1498.81	ENSMMUP00000001129	ENSMMUP00000001129	yes	yes	3	0.00039174	111.12	1			1			3542900	3542900	0	0
16276	196	LLGPHVEGLKVEEQHSPVR	19	1	2123.15	ENSMMUP00000001129	ENSMMUP00000001129	yes	yes	4	0.00056615	82.59	1			1			4335200	4335200	0	0
25926	196	VDAIPFTYEQLDVLK	15	0	1749.92	ENSMMUP00000001129	ENSMMUP00000001129	yes	yes	2	4.0486e-05	126.16	2	2	2	2	2	2	60544000	15087000	29575000	15882000
12326	197	ILELPYSIHAFQHLR	15	0	1836	ENSMMUP00000001141	ENSMMUP00000001141	yes	yes	4	0.00029471	92.19	1	2	2	1	2	2	3145800	706590	1280900	1158300
17631	197	LTTKCPECENSLK	13	1	1578.74	ENSMMUP00000001141;ENSMMUP00000001140	ENSMMUP00000001141	yes	no	2	0.037799	68.676		1			1		8766600	0	8766600	0
4632	198	EAGNLEGILLTGLTK	15	0	1527.85	ENSMMUP00000001148	ENSMMUP00000001148	yes	yes	2	7.2836e-05	109.07	1	2	1	1	2	1	16040000	2699500	10699000	2640700
13690	198	KGTDVDVGPFLNSLVQEGEWER	22	1	2474.21	ENSMMUP00000001148	ENSMMUP00000001148	yes	yes	3	3.4295e-18	142.85	1	1	1	1	1	1	31254000	9461000	9564000	12229000
17950	198	LYDMQHTPTPIGDETEPTIIER	22	0	2555.22	ENSMMUP00000001148	ENSMMUP00000001148	yes	yes	3	0.00046041	68.291			1			1	1261800	0	0	1261800
19570	198	NLAIFDLR	8	0	960.539	ENSMMUP00000001148	ENSMMUP00000001148	yes	yes	2	0.0021142	113.71	3	4	2	3	4	2	5084900	4065400	0	1019400
22760	198	SGTKPDILWAPHQVDR	16	1	1818.94	ENSMMUP00000001148	ENSMMUP00000001148	yes	yes	3	0.036379	67.326		1			1		6220900	0	6220900	0
23370	198	SLWYTLHFMK	10	0	1324.66	ENSMMUP00000001148	ENSMMUP00000001148	yes	yes	3	0.070656	53.683	1	1	1	1	1	1	226470	19825	83112	123540
25866	198	VASFYEGQVAIWDLR	15	0	1752.88	ENSMMUP00000001148	ENSMMUP00000001148	yes	yes	2	6.0702e-07	147.56	1	1	2	1	1	2	24001000	6114500	7397500	10489000
28907	198	YGLDTEQVWR	10	0	1265.6	ENSMMUP00000001148	ENSMMUP00000001148	yes	yes	2	0.015117	73.067	1	1	1	1	1	1	6116300	1657000	2520100	1939100
4860	199	EDNHPFDLGLYNEAVK	16	0	1859.87	ENSMMUP00000001149;ENSMMUP00000030411	ENSMMUP00000001149	yes	no	2,3	1.8231e-67	230.38	10	11	11	10	11	11	226310000	83311000	73151000	69843000
12143	199	IIHEFPQFYPLGIVQHD	17	0	2052.05	ENSMMUP00000001149	ENSMMUP00000001149	yes	yes	2,3	1.8751e-06	145.86	7	8	4	7	8	4	305070000	102500000	82208000	120360000
12574	199	INVGMLAQFIDKPVCFVGR	19	1	2163.13	ENSMMUP00000001149	ENSMMUP00000001149	yes	yes	2,3	1.5584e-06	115.73	1	2	4	1	2	4	28310000	9310900	6173200	12826000
19400	199	NGTIELMEPLDEEISGIMEVVGK	23	0	2502.22	ENSMMUP00000001149;ENSMMUP00000030411	ENSMMUP00000001149	yes	no	2,3	6.4872e-47	183.45	3		3	3		3	13817000	7989400	0	5827800
185	200	AASGFNAVEDAQTLR	15	0	1548.75	ENSMMUP00000001151	ENSMMUP00000001151	yes	yes	2	4.2626e-15	170.78		1			1		1219600	0	1219600	0
445	200	AEIDMLDIR	9	0	1074.54	ENSMMUP00000001151	ENSMMUP00000001151	yes	yes	2	0.00045307	136.63	2	2	2	2	2	2	64174000	34866000	22679000	6629600
2682	200	DEGNYLDDALVR	12	0	1378.64	ENSMMUP00000001151	ENSMMUP00000001151	yes	yes	2	0.00010562	120.53	2	3	3	2	3	3	76093000	21299000	34761000	20032000
8488	200	GAGTDEGCLIEILASR	16	0	1660.81	ENSMMUP00000001151	ENSMMUP00000001151	yes	yes	2	2.5592e-53	216.39	4	3	2	4	3	2	154130000	56622000	69805000	27703000
9513	200	GLGTDEDAIISVLAYR	16	0	1691.87	ENSMMUP00000001151	ENSMMUP00000001151	yes	yes	2,3	2.2001e-41	208.39	22	17	13	22	17	13	1676800000	589440000	677160000	410210000
19424	200	NHLLHVFDEYK	11	0	1413.7	ENSMMUP00000001151	ENSMMUP00000001151	yes	yes	2,3	1.5372e-18	176.8	1	2	2	1	2	2	5966100	2093000	1286200	2586800
19425	200	NHLLHVFDEYKR	12	1	1569.81	ENSMMUP00000001151	ENSMMUP00000001151	yes	yes	2,3,4	3.0351e-45	210.15	7	5	3	7	5	3	28559000	15645000	3663300	9251000
22500	200	SETSGSFEDALLAIVK	16	0	1665.85	ENSMMUP00000001151	ENSMMUP00000001151	yes	yes	2,3	6.3717e-83	236.92	14	12	11	14	12	11	1896700000	577720000	843780000	475170000
23104	200	SLEDDIRSDTSFMFQR	16	1	1945.88	ENSMMUP00000001151	ENSMMUP00000001151	yes	yes	2,3	0.0061516	79.022		2			2		12134000	0	12134000	0
27015	200	VLVSLSAGGRDEGNYLDDALVR	22	1	2318.19	ENSMMUP00000001151	ENSMMUP00000001151	yes	yes	2,3	8.4808e-12	126.4	4	6	4	4	6	4	193470000	77637000	82137000	33694000
69	205	AAFQSLLDAQADEAVLDHPDLK	22	0	2366.18	ENSMMUP00000001172;ENSMMUP00000001174;ENSMMUP00000001173	ENSMMUP00000001172	yes	no	3	0.070452	36.679	1			1			5055500	5055500	0	0
8981	205	GFQMLADPGSFDSNAFTLLLR	21	0	2299.13	ENSMMUP00000001172;ENSMMUP00000001174;ENSMMUP00000001173	ENSMMUP00000001172	yes	no	2,3	4.4014e-23	158.52	1	3	2	1	3	2	6339600	466950	3144000	2728700
20078	205	NSLEILLGSIGR	12	0	1270.72	ENSMMUP00000001172;ENSMMUP00000001175	ENSMMUP00000001172	yes	no	2	4.5314e-45	205.96	4	4	4	4	4	4	25808000	11247000	8311600	6249500
23287	205	SLPHITDVSWR	11	0	1309.68	ENSMMUP00000001172;ENSMMUP00000001174;ENSMMUP00000001175	ENSMMUP00000001172	yes	no	2,3	0.0028353	90.653	3	3	3	3	3	3	59062000	34482000	15226000	9354100
1719	206	AQELYHEEFAR	11	0	1391.65	ENSMMUP00000001179;ENSMMUP00000001177	ENSMMUP00000001179	yes	no	2	5.8532e-08	152.4	2	2	1	2	2	1	27176000	7907800	12631000	6636900
1993	206	ATEVPLSWDSFNKGDCFIIDLGTK	24	1	2712.31	ENSMMUP00000001179;ENSMMUP00000001177	ENSMMUP00000001179	yes	no	3	0.10004	43.476		1			1		5051900	0	5051900	0
4897	206	EDYQTSPLLETQAEDHPPR	19	0	2225.02	ENSMMUP00000001179	ENSMMUP00000001179	yes	yes	3	0.00046905	76.82	1	1	2	1	1	2	20909000	2510600	2345700	16052000
5906	206	ELQGYESTDFVSYFK	15	0	1811.83	ENSMMUP00000001179;ENSMMUP00000001177	ENSMMUP00000001179	yes	no	2	6.1913e-06	144.18	2	2	2	2	2	2	56391000	15005000	21730000	19655000
6209	206	EPIHLLSLFK	10	0	1195.7	ENSMMUP00000001179;ENSMMUP00000001177	ENSMMUP00000001179	yes	no	2,3	0.0013183	99.688	3	3	2	3	3	2	74430000	52218000	10747000	11465000
8544	206	GASQEEEKGAEYVASVLK	18	1	1893.93	ENSMMUP00000001179	ENSMMUP00000001179	yes	yes	3	0.041626	57.52	1	1		1	1		18920000	7998400	10922000	0
9925	206	GQIIYTWQGANATR	14	0	1577.8	ENSMMUP00000001179;ENSMMUP00000001177	ENSMMUP00000001179	yes	no	2	1.8198e-53	223.7	1	1	2	1	1	2	13857000	1046300	4919600	7890800
12724	206	IQEGEEPEEFWSSLGGK	17	0	1920.87	ENSMMUP00000001179	ENSMMUP00000001179	yes	yes	2	3.7305e-05	127.32	2			2			9412600	9412600	0	0
15793	206	LHSSPQMAAQHNMVDDGSGKVEIWR	25	1	2792.31	ENSMMUP00000001179;ENSMMUP00000001177	ENSMMUP00000001179	yes	no	3	9.6338e-05	78.976	1			1			3768500	3768500	0	0
16925	206	LPQNSGYIWIGK	12	0	1374.73	ENSMMUP00000001179	ENSMMUP00000001179	yes	yes	2	5.4209e-07	142.83	2	2	2	2	2	2	42620000	10042000	18587000	13991000
20172	206	NTQIQVLPEGGETPIFK	17	0	1869.98	ENSMMUP00000001179;ENSMMUP00000001177	ENSMMUP00000001179	yes	no	2	8.6274e-08	153.72	2	2	1	2	2	1	45637000	12757000	20908000	11972000
20953	206	QGHEPPTFTGWFLGWDSSK	19	0	2176	ENSMMUP00000001179	ENSMMUP00000001179	yes	yes	2,3	7.3206e-13	149.86	3	1	3	3	1	3	26081000	9641300	10084000	6355700
26813	206	VLGGKPELPDGGDDDDIIADISNR	24	1	2480.2	ENSMMUP00000001179;ENSMMUP00000001177	ENSMMUP00000001179	yes	no	3	0.00031535	73.459	1	1	1	1	1	1	36215000	7929100	14663000	13623000
27528	206	VSQGKEPIHLLSLFK	15	1	1694.97	ENSMMUP00000001179;ENSMMUP00000001177	ENSMMUP00000001179	yes	no	2,3,4	2.0339e-06	149.22	2	3	3	2	3	3	41970000	11955000	25665000	4349500
3836	207	DNTQLLINQLWQLPTER	17	0	2081.09	ENSMMUP00000001186	ENSMMUP00000001186	yes	yes	3	3.0883e-05	116.78	1	1		1	1		2600900	1127500	1473400	0
6799	207	EWLIEVPGNADPLEDQFAK	19	0	2170.06	ENSMMUP00000001186	ENSMMUP00000001186	yes	yes	2	1.7515e-05	92.633	1			1			594620	594620	0	0
25187	207	TNLVWDEVSSQWR	13	0	1618.77	ENSMMUP00000001186	ENSMMUP00000001186	yes	yes	2	0.00089616	95.854	1	2	1	1	2	1	9945300	0	4950800	4994500
7584	208	FLFDLDVDDGLAAVGYSK	18	0	1943.95	ENSMMUP00000001187	ENSMMUP00000001187	yes	yes	2	0.13597	34.498			1			1	15063000	0	0	15063000
20422	208	PAYQGSNPISDIWAIHALR	19	0	2108.08	ENSMMUP00000001187	ENSMMUP00000001187	yes	yes	3	8.502e-08	123.08	1	1	1	1	1	1	7814800	2845000	1620300	3349600
2293	209	AWHPEHFVCGGCSTALGGSSFFEK	24	0	2667.16	ENSMMUP00000001196;ENSMMUP00000001197	ENSMMUP00000001196	yes	no	3,4	1.9522e-16	131.56	2	2	2	2	2	2	57310000	10043000	22754000	24513000
2809	209	DFLQLFAPR	9	0	1105.59	ENSMMUP00000001196;ENSMMUP00000001197	ENSMMUP00000001196	yes	no	2	1.2692e-26	199.46	5	5	3	5	5	3	106060000	36283000	28867000	40915000
4762	209	ECFAPFSGGSFFEHEGRPLCENHFHAR	27	1	3221.4	ENSMMUP00000001196;ENSMMUP00000001197	ENSMMUP00000001196	yes	no	3,4	1.2168e-22	117.48	1	2	2	1	2	2	6781900	2134800	1876900	2770200
9431	209	GLCGSCNKPIAGQVVTALGR	20	1	2057.05	ENSMMUP00000001196;ENSMMUP00000001197	ENSMMUP00000001196	yes	no	3	0.00012371	103.88		1	1		1	1	7295500	0	1358700	5936800
10058	209	GSLDTMLGLLQSDLSR	16	0	1704.87	ENSMMUP00000001196;ENSMMUP00000001197	ENSMMUP00000001196	yes	no	2,3	8.1967e-101	252.73	9	9	8	9	9	8	698830000	187820000	284270000	226750000
16435	209	LLQELNATQFNITDEIMSQFPSSK	24	0	2753.36	ENSMMUP00000001196;ENSMMUP00000001197	ENSMMUP00000001196	yes	no	2,3	1.5599e-66	197.85	1	2	3	1	2	3	56062000	6357600	27204000	22500000
16559	209	LMASLSDFR	9	0	1038.52	ENSMMUP00000001196;ENSMMUP00000001197	ENSMMUP00000001196	yes	no	2	1.0502e-05	155.84		2	2		2	2	7903400	0	2819400	5084000
18985	209	MVTALGTHWHPEHFCCVSCGEPFGDEGFHER	31	0	3685.54	ENSMMUP00000001196;ENSMMUP00000001197	ENSMMUP00000001196	yes	no	4,5,6	0.0019689	45.666	1		3	1		3	16884000	1989200	0	14895000
20660	209	PSLPSSPSPGLPK	13	0	1262.69	ENSMMUP00000001196;ENSMMUP00000001197	ENSMMUP00000001196	yes	no	2	0.099727	44.612			1			1	18843000	0	0	18843000
21481	209	RDFLQLFAPR	10	1	1261.69	ENSMMUP00000001196;ENSMMUP00000001197	ENSMMUP00000001196	yes	no	2,3	9.3418e-07	155	8	5	10	8	5	10	167280000	58396000	49902000	58986000
23570	209	SPKPAAPAAPPFSSSSGVLGTGLCELDR	28	1	2768.38	ENSMMUP00000001196;ENSMMUP00000001197	ENSMMUP00000001196	yes	no	3	0.0069738	49.662			1			1	8832700	0	0	8832700
27371	209	VQNHLPASGPTQPPVASSTNEGSPSPPEPTGK	32	0	3164.54	ENSMMUP00000001196;ENSMMUP00000001197	ENSMMUP00000001196	yes	no	3,4	2.5758e-24	112.39	3	2	2	3	2	2	64992000	28227000	26842000	9923700
201	210	AATHGLMLGALQGDGPLPAELEELR	25	0	2558.32	ENSMMUP00000001201;ENSMMUP00000001203	ENSMMUP00000001201	yes	no	3	2.5457e-45	160.57	2	2	1	2	2	1	57854000	20623000	25890000	11341000
6557	210	ETHQVLDMLFPK	12	0	1456.74	ENSMMUP00000001201;ENSMMUP00000001203	ENSMMUP00000001201	yes	no	2,3	3.428e-14	162.49	2	3	1	2	3	1	20952000	9155500	8593200	3203500
17834	210	LVSSVFELQQLVEGHQEPYLLCWDQSR	27	0	3259.6	ENSMMUP00000001201;ENSMMUP00000001203	ENSMMUP00000001201	yes	no	3	0.051172	34.685	1			1			667500	667500	0	0
9282	212	GILDGESAPTFPEPFGVK	18	0	1859.93	ENSMMUP00000001206	ENSMMUP00000001206	yes	yes	2	1.0129e-05	109.36	2	2	2	2	2	2	55131000	11419000	28342000	15370000
9576	212	GLMELLPEAK	10	0	1099.59	ENSMMUP00000001206	ENSMMUP00000001206	yes	yes	2	0.01339	74.841	2	1		2	1		3615000	1796100	1818900	0
17609	212	LTQLYYLLAK	10	0	1224.71	ENSMMUP00000001206	ENSMMUP00000001206	yes	yes	2	0.009486	105.98	1	2		1	2		1007200	1007200	0	0
27436	212	VSDDTVMHLATAEALVEAGK	20	0	2056.01	ENSMMUP00000001206	ENSMMUP00000001206	yes	yes	3	2.7745e-07	120.9	1	1		1	1		14086000	4420100	9665800	0
29049	212	YIVQSGYFVEENLQHWSYFQTK	22	0	2765.31	ENSMMUP00000001206	ENSMMUP00000001206	yes	yes	3	0.012466	48.376			1			1	959890	0	0	959890
29582	212	YVAAMVLSAAGDSLGYYNGK	20	0	2048.99	ENSMMUP00000001206	ENSMMUP00000001206	yes	yes	3	0.089926	36.451			1			1	8219400	0	0	8219400
9112	213	GGQTHLGLPVFNTVK	15	0	1566.85	ENSMMUP00000001216	ENSMMUP00000001216	yes	yes	2,3	2.4808e-07	153.79	7	6	6	7	6	6	695960000	371970000	109800000	214180000
12838	213	ISALQSAGVVVSMSPAQLGTTIYK	24	0	2420.3	ENSMMUP00000001216	ENSMMUP00000001216	yes	yes	3	8.6865e-07	84.327		1			1		6918500	0	6918500	0
15875	213	LIGPNCPGVINPGECK	16	0	1723.84	ENSMMUP00000001216	ENSMMUP00000001216	yes	yes	2	6.7181e-05	111.64	1		1	1		1	4193200	2155000	0	2038200
20994	213	QHNSGPNSKPVVSFIAGLTAPPGR	24	1	2430.28	ENSMMUP00000001216	ENSMMUP00000001216	yes	yes	3,4	0.015303	54.223	1	3	1	1	3	1	84946000	21031000	49634000	14281000
966	214	AIGISNFNHLQVEAILNKPGLK	22	1	2375.33	ENSMMUP00000001232;ENSMMUP00000001238	ENSMMUP00000001232	yes	no	2,3,4	1.1367e-29	158.44	7	5	4	7	5	4	521270000	298020000	119610000	103650000
9351	214	GIVVTAYSPLGSPDRPWAKPEDPSLLEDPR	30	2	3261.67	ENSMMUP00000001232;ENSMMUP00000001238	ENSMMUP00000001232	yes	no	3,4	1.3409e-09	91.416	7	7	9	7	7	9	1699700000	395450000	602570000	701690000
10792	214	HIDCAHVYQNENEVGVAIQEK	21	0	2452.14	ENSMMUP00000001232;ENSMMUP00000001238	ENSMMUP00000001232	yes	no	2,3,4	2.9325e-168	276.4	18	6	10	18	6	10	602890000	458060000	54979000	89855000
15010	214	LDYLDLYLIHWPTGFKPGK	19	1	2275.2	ENSMMUP00000001232;ENSMMUP00000001238	ENSMMUP00000001232	yes	no	2,3,4	1.1503e-09	136.81	2	6		2	6		13182000	1902300	11280000	0
29074	214	YKPAVNQIECHPYLTQEK	18	1	2217.09	ENSMMUP00000001232;ENSMMUP00000001238	ENSMMUP00000001232	yes	no	3,4	0.0011355	85.006	4	3	2	4	3	2	11403000	6556700	3445100	1401100
1226	215	ALGISNFNHFQIEK	14	0	1616.83	ENSMMUP00000001234	ENSMMUP00000001234	yes	yes	3	0.0022854	78.903	4	2	2	4	2	2	82998000	56398000	17696000	8903500
18118	216	MAHIFYDTFFNLEK	14	0	1774.84	ENSMMUP00000001248;ENSMMUP00000001249	ENSMMUP00000001248	yes	no	3	2.2487e-06	136.7	1	1	1	1	1	1	1745500	93864	1162400	489250
19959	216	NPTSIEYWFR	10	0	1311.62	ENSMMUP00000001248;ENSMMUP00000001249	ENSMMUP00000001248	yes	no	2	1.9595e-06	147.75		1	1		1	1	2228200	0	1404200	824020
3204	217	DIPNMFMDSAGSVSK	15	0	1597.71	ENSMMUP00000001266	ENSMMUP00000001266	yes	yes	2	3.8179e-05	116.35	2	3	3	2	3	3	172540000	50491000	73144000	48907000
9027	217	GGALLTSTSGPGFHLMLPFITSYK	24	0	2494.29	ENSMMUP00000001266;ENSMMUP00000001267	ENSMMUP00000001266	yes	no	3	0.00010121	78.088		3			3		17470000	0	17470000	0
11808	217	IEVVNFLVPNAVYDIVK	17	0	1931.08	ENSMMUP00000001266;ENSMMUP00000001267	ENSMMUP00000001266	yes	no	2,3	2.4676e-16	171.71	17	18	18	17	18	18	1157900000	320560000	483200000	354140000
13804	217	KISEIEDAAFLAR	13	1	1461.78	ENSMMUP00000001266	ENSMMUP00000001266	yes	yes	2,3	1.3978e-05	128.95	8	9	7	8	9	7	170510000	59423000	51163000	59926000
14653	217	LALQQDLTSMAPGLVIQAVR	20	0	2123.18	ENSMMUP00000001266	ENSMMUP00000001266	yes	yes	2,3	1.1814e-81	231.86	6	5	6	6	5	6	314750000	83596000	145390000	85759000
16034	217	LKLTPEYLQLMK	12	1	1475.84	ENSMMUP00000001266	ENSMMUP00000001266	yes	yes	3	1.0241e-13	164.13	1			1			2184100	2184100	0	0
17322	217	LSFGLEDEPLETATK	15	0	1648.82	ENSMMUP00000001266	ENSMMUP00000001266	yes	yes	2	4.3662e-22	186.05	2	4	3	2	4	3	174160000	36040000	70307000	67812000
17592	217	LTPEYLQLMK	10	0	1234.66	ENSMMUP00000001266	ENSMMUP00000001266	yes	yes	2	4.535e-05	135.55	4	4	4	4	4	4	255380000	101180000	123560000	30641000
20256	217	NVPCGTSGGVMIYFDR	16	0	1771.8	ENSMMUP00000001266;ENSMMUP00000001267	ENSMMUP00000001266	yes	no	2	4.9996e-05	131.82	3	2	2	3	2	2	51529000	21844000	15373000	14312000
10740	218	HGLPPSETIAVVEHINAK	18	0	1911.02	ENSMMUP00000001269	ENSMMUP00000001269	yes	yes	3	1.9004e-09	152.07	3	4	4	3	4	4	201980000	86115000	54447000	61421000
16561	218	LMAVPNLFMLETVDSLK	17	0	1920.01	ENSMMUP00000001269	ENSMMUP00000001269	yes	yes	2,3	3.0647e-86	242.41	4	7	2	4	7	2	50184000	17564000	21434000	11187000
24620	218	TFGENYVQELLEK	13	0	1568.77	ENSMMUP00000001269	ENSMMUP00000001269	yes	yes	2	4.7085e-14	159	6	5	5	6	5	5	106480000	36720000	37990000	31774000
12045	219	IHIMPSMNPDGFEAVK	16	0	1784.86	ENSMMUP00000001270	ENSMMUP00000001270	yes	yes	3	0.004037	69.258		1	1		1	1	4308400	0	2215800	2092600
19785	219	NLWVLVVGR	9	0	1054.63	ENSMMUP00000001270	ENSMMUP00000001270	yes	yes	2	0.00038525	138.4	1	1	1	1	1	1	1974800	920930	530970	522880
23340	219	SLTPDDDVFQYLAHTYASR	19	0	2198.03	ENSMMUP00000001270	ENSMMUP00000001270	yes	yes	2,3	1.5151e-05	99.273	4	2	3	4	2	3	223630000	68831000	67842000	86955000
1221	220	ALGFTDTVTVR	11	0	1178.63	ENSMMUP00000001276	ENSMMUP00000001276	yes	yes	2	0.011785	69.721	2	1	1	2	1	1	28177000	6466100	13034000	8677400
8586	220	GDCDGVQINVPVTFR	15	0	1675.8	ENSMMUP00000001276;ENSMMUP00000001277	ENSMMUP00000001276	yes	no	2	5.0697e-07	149.3	1	2	2	1	2	2	68082000	12720000	38477000	16884000
13927	220	KLGGDLLQALNEITESGR	18	1	1913.02	ENSMMUP00000001276	ENSMMUP00000001276	yes	yes	2,3	5.6328e-19	176.1	8	8	7	8	8	7	482780000	202840000	161780000	118160000
14582	220	LAENNIQPIFAVTR	14	0	1584.86	ENSMMUP00000001276;ENSMMUP00000001277	ENSMMUP00000001276	yes	no	2	2.2237e-08	147.1	4	4	3	4	4	3	326670000	77583000	136760000	112320000
15516	220	LGGDLLQALNEITESGR	17	0	1784.93	ENSMMUP00000001276	ENSMMUP00000001276	yes	yes	2,3	2.8443e-32	192.24	10	14	12	10	14	12	603020000	156370000	282830000	163810000
16512	220	LLVFATDDGFHFAGDGK	17	0	1808.87	ENSMMUP00000001276;ENSMMUP00000001277	ENSMMUP00000001276	yes	no	2,3	1.2884e-11	166.92	8	6	9	8	6	9	369010000	139220000	102780000	127010000
23444	220	SNEFDYPSVGQLAHK	15	0	1690.8	ENSMMUP00000001276;ENSMMUP00000001277	ENSMMUP00000001276	yes	no	2,3	2.0432e-30	195.1	8	8	8	8	8	8	684730000	266710000	101620000	316400000
23752	220	SQWNNDNPLFK	11	0	1361.64	ENSMMUP00000001276	ENSMMUP00000001276	yes	yes	2	8.1121e-26	181.66	3	2	2	3	2	2	50785000	15757000	7877300	27151000
25619	220	TVLPFVNTHPDK	12	0	1366.72	ENSMMUP00000001276;ENSMMUP00000001277	ENSMMUP00000001276	yes	no	3	0.085914	46.592	1	1		1	1		2559300	681470	1877800	0
25620	220	TVLPFVNTHPDKLR	14	1	1635.91	ENSMMUP00000001276;ENSMMUP00000001277	ENSMMUP00000001276	yes	no	4	0.014198	75.695	3	2	1	3	2	1	67814000	52730000	11691000	3391700
26301	220	VFLDHNALPDTLK	13	0	1481.79	ENSMMUP00000001276;ENSMMUP00000001277	ENSMMUP00000001276	yes	no	2,3	3.507e-32	192.65	5	4	5	5	4	5	463120000	290830000	96820000	75469000
27590	220	VTATECIQEQSFVIR	15	0	1779.88	ENSMMUP00000001276	ENSMMUP00000001276	yes	yes	2	2.8082e-30	192.46	2	1		2	1		27235000	20668000	6566900	0
27710	220	VTYDSFCSNGVTLK	14	0	1589.74	ENSMMUP00000001276;ENSMMUP00000001277	ENSMMUP00000001276	yes	no	2	2.9255e-05	121.99		1			1		6112100	0	6112100	0
3299	221	DKLDTLVDFPINDLDMSEFLINPNAGPCR	29	1	3318.59	ENSMMUP00000001283;ENSMMUP00000001284	ENSMMUP00000001283	yes	no	3	0.00026446	63.893	1			1			3281400	3281400	0	0
5363	221	EHLIDELDYILLPTEGWNK	19	0	2297.16	ENSMMUP00000001283;ENSMMUP00000001284	ENSMMUP00000001283	yes	no	2,3	7.4354e-81	233.14	2	3	3	2	3	3	73219000	13018000	44972000	15229000
11217	221	HSSYTHHTGSSLFGQPFLMAVPR	23	0	2556.23	ENSMMUP00000001283;ENSMMUP00000001284	ENSMMUP00000001283	yes	no	4	0.00091592	60.034			1			1	534460	0	0	534460
11818	221	IFAMDENLSSIMER	14	0	1654.77	ENSMMUP00000001283;ENSMMUP00000001284	ENSMMUP00000001283	yes	no	2	2.8769e-11	159.18		1	2		1	2	1864700	0	618950	1245800
17835	221	LVSWYTLMEGQEPIAR	16	0	1891.95	ENSMMUP00000001283;ENSMMUP00000001284	ENSMMUP00000001283	yes	no	2,3	2.068e-41	208.68	1	2	3	1	2	3	33647000	6564100	13546000	13537000
19864	221	NNTEDKLYNLLLLR	14	1	1717.94	ENSMMUP00000001283;ENSMMUP00000001284	ENSMMUP00000001283	yes	no	2,3	9.3775e-23	190.37	4	3	2	4	3	2	18046000	11595000	4644700	1806400
22567	221	SFLALDWDPDLK	12	0	1418.71	ENSMMUP00000001283;ENSMMUP00000001284	ENSMMUP00000001283	yes	no	2	7.5122e-36	195.25	3	3	3	3	3	3	31217000	9091000	9807000	12319000
29398	221	YQEELNFDNPLGMR	14	0	1724.78	ENSMMUP00000001283;ENSMMUP00000001284	ENSMMUP00000001283	yes	no	2	1.3233e-08	151.56	1			1			1001100	1001100	0	0
29605	221	YVGFDSWDKYQMGDQNVYPGPIDNSGLLK	29	1	3305.53	ENSMMUP00000001283;ENSMMUP00000001284	ENSMMUP00000001283	yes	no	3	1.6005e-08	81.341	1	1	1	1	1	1	28064000	8865600	9477200	9721000
2281	222	AWDVLLDHIQSAALSK	16	0	1765.94	ENSMMUP00000001286	ENSMMUP00000001286	yes	yes	3	0.0005322	89.624	1		1	1		1	12021000	5326700	0	6693800
6790	222	EWGAEALTSLIK	12	0	1316.7	ENSMMUP00000001286	ENSMMUP00000001286	yes	yes	2	0.0011033	95.273	3	4	4	3	4	4	11354000	2832500	4689700	3831600
17117	222	LQLLLLNPLK	10	0	1163.76	ENSMMUP00000001286	ENSMMUP00000001286	yes	yes	2	0.016788	71.349			1			1	272150	0	0	272150
18799	222	MREWGAEALTSLIK	14	1	1603.84	ENSMMUP00000001286	ENSMMUP00000001286	yes	yes	3	0.00086615	103.76		1			1		555500	0	555500	0
22610	222	SFQEILQIVSPVR	13	0	1514.85	ENSMMUP00000001286	ENSMMUP00000001286	yes	yes	2	0.00073291	98.582		2	3		2	3	6364300	0	2662500	3701800
855	223	AHDGGIYAISWSPDSTHLLSASGDK	25	0	2584.22	ENSMMUP00000001290;ENSMMUP00000010002	ENSMMUP00000001290	yes	no	2,3,4	9.227e-67	183.24	10	9	11	10	9	11	2861100000	1083700000	827940000	949530000
5575	223	EKFGAVFLWDSGSSVGEITGHNK	23	1	2464.2	ENSMMUP00000001290;ENSMMUP00000035423	ENSMMUP00000001290	yes	no	2,3,4	3.614e-98	225.29	3	3	2	3	3	2	212210000	152400000	43939000	15873000
6964	223	FATASADGQIYIYDGK	16	0	1718.82	ENSMMUP00000001290;ENSMMUP00000010002	ENSMMUP00000001290	yes	no	2	5.9312e-42	211.9	5	3	2	5	3	2	69566000	22312000	28375000	18879000
7252	223	FGAVFLWDSGSSVGEITGHNK	21	0	2207.06	ENSMMUP00000001290;ENSMMUP00000035423	ENSMMUP00000001290	yes	no	2,3	9.2255e-16	141.18	6	6	8	6	6	8	1026600000	348410000	308590000	369590000
9888	223	GPVTDVAYSHDGAFLAVCDASK	22	0	2279.05	ENSMMUP00000001290;ENSMMUP00000010002	ENSMMUP00000001290	yes	no	2,3	2.4539e-30	159.95	4	3	5	4	3	5	187410000	50060000	89956000	47390000
13382	223	KCFSIDNPGYEPEVVAVHPGGDTVAVGGADGNVR	34	1	3482.65	ENSMMUP00000001290;ENSMMUP00000010002	ENSMMUP00000001290	yes	no	4	2.9109e-10	70.57	1	1		1	1		25272000	14683000	10588000	0
14743	223	LATGSDDNCAAFFEGPPFK	19	0	2042.9	ENSMMUP00000001290	ENSMMUP00000001290	yes	yes	2,3	2.3931e-18	168.64	4	4	3	4	4	3	96232000	27037000	42469000	26727000
15747	223	LHHVSSLAWLDEHTLVTTSHDASVK	25	0	2782.4	ENSMMUP00000001290;ENSMMUP00000010002	ENSMMUP00000001290	yes	no	2,3,4,5	4.7847e-57	174.22	37	17	29	37	17	29	2380400000	1208800000	478010000	693600000
18041	223	LYSILGTTLK	10	0	1107.65	ENSMMUP00000001290;ENSMMUP00000010002	ENSMMUP00000001290	yes	no	2	0.00045129	110.38	1	2	1	1	2	1	19574000	5587100	11768000	2218900
18042	223	LYSILGTTLKDEGK	14	1	1536.84	ENSMMUP00000001290;ENSMMUP00000010002	ENSMMUP00000001290	yes	no	2,3	1.3291e-22	190.03	8	9	7	8	9	7	667120000	260420000	163970000	242740000
18928	223	MTVDESGQLISCSMDDTVR	19	0	2142.92	ENSMMUP00000001290;ENSMMUP00000010002	ENSMMUP00000001290	yes	no	2	4.7073e-17	159.75	1	1	1	1	1	1	59885000	19394000	19816000	20675000
19460	223	NIDNPALADIYTEHAHQVVVAK	22	0	2417.23	ENSMMUP00000001290	ENSMMUP00000001290	yes	yes	2,3,4	3.7782e-37	172.5	13	14	13	13	14	13	2063800000	765630000	744390000	553760000
26232	223	VFASLPQVER	10	0	1144.62	ENSMMUP00000001290;ENSMMUP00000010002	ENSMMUP00000001290	yes	no	2	2.65e-05	140.49		2	2		2	2	32994000	0	15076000	17918000
27844	223	VVTVFSVADGYSENNVFYGHHAK	23	0	2539.21	ENSMMUP00000001290;ENSMMUP00000010002	ENSMMUP00000001290	yes	no	2,3,4	2.6481e-19	137.89	8	7	9	8	7	9	970640000	314700000	371240000	284710000
28610	223	YAPSGFYIASGDVSGK	16	0	1617.77	ENSMMUP00000001290	ENSMMUP00000001290	yes	yes	2	1.2533e-10	164.41	3	3	2	3	3	2	279170000	79871000	136670000	62632000
1314	225	ALNLFQGSVEDTTGSQSLAALLNK	24	0	2476.28	ENSMMUP00000001311	ENSMMUP00000001311	yes	yes	2,3	4.5789e-24	146.97	1	2	1	1	2	1	22340000	4722300	12953000	4664700
4099	225	DSLIIIDELGR	11	0	1242.68	ENSMMUP00000001311;ENSMMUP00000036559	ENSMMUP00000001311	yes	no	2	0.01012	72.29	1			1			1162300	1162300	0	0
6089	225	ENDWYLAYK	9	0	1200.55	ENSMMUP00000001311	ENSMMUP00000001311	yes	yes	2	0.021216	71.451	2			2			4480500	4480500	0	0
14975	225	LDSSTQFGYYFR	12	0	1482.68	ENSMMUP00000001311;ENSMMUP00000036559	ENSMMUP00000001311	yes	no	2	2.6502e-14	163.99		1	1		1	1	19056000	0	15155000	3900700
16699	225	LNLVEAFVEDAELR	14	0	1616.84	ENSMMUP00000001311	ENSMMUP00000001311	yes	yes	2,3	7.6565e-23	188.59	7	9	10	7	9	10	67177000	14814000	32061000	20303000
18027	225	LYQGINQLPNVIQALEK	17	0	1940.07	ENSMMUP00000001311	ENSMMUP00000001311	yes	yes	2	4.2288e-11	161.91	3	2	3	3	2	3	43005000	14437000	12554000	16013000
2781	227	DFIIFEAAPQETR	13	0	1535.76	ENSMMUP00000001318;ENSMMUP00000032475	ENSMMUP00000001318	yes	no	2	0.0048709	75.669			1			1	738920	0	0	738920
14188	227	KPVADYFL	8	1	951.507	ENSMMUP00000001318;ENSMMUP00000032475	ENSMMUP00000001318	yes	no	2	0.11104	60.91		1			1		1103400	0	1103400	0
14210	227	KQEVPHDGPMCDLLWSDPEDTTGWGVSPR	29	1	3308.49	ENSMMUP00000001318;ENSMMUP00000032475	ENSMMUP00000001318	yes	no	4	2.6876e-09	87.509	1	1		1	1		12773000	7236800	5536500	0
26399	227	VGGDVPETNYLFMGDFVDR	19	0	2129.97	ENSMMUP00000001318	ENSMMUP00000001318	yes	yes	2,3	7.4364e-13	149.73	2	6	1	2	6	1	40319000	7101000	24688000	8529300
1361	228	ALSDHHIYLEGTLLK	15	0	1708.91	ENSMMUP00000001319;ENSMMUP00000032476;ENSMMUP00000032477;ENSMMUP00000032478;ENSMMUP00000032479;ENSMMUP00000039391	ENSMMUP00000001319	yes	no	3	0.0024986	76.01	1		1	1		1	6897800	2414200	0	4483600
1362	228	ALSDHHIYLEGTLLKPNMVTPGHACTQK	28	1	3130.57	ENSMMUP00000001319;ENSMMUP00000032476;ENSMMUP00000032477;ENSMMUP00000032478;ENSMMUP00000032479	ENSMMUP00000001319	yes	no	2,3,4,5	7.7122e-29	134.62	8	8	10	8	8	10	2107100000	552840000	731000000	823250000
8060	228	FSHEEIAMATVTALR	15	0	1674.84	ENSMMUP00000001319;ENSMMUP00000032476;ENSMMUP00000032477;ENSMMUP00000032478;ENSMMUP00000032479	ENSMMUP00000001319	yes	no	2,3	2.5565e-23	190.86	20	16	21	20	16	21	2031900000	906130000	611460000	514280000
8061	228	FSHEEIAMATVTALRR	16	1	1830.94	ENSMMUP00000001319;ENSMMUP00000032476;ENSMMUP00000032477;ENSMMUP00000032478;ENSMMUP00000032479	ENSMMUP00000001319	yes	no	2,3,4	8.6165e-05	116.63	5	3	2	5	3	2	187440000	91370000	42402000	53671000
9279	228	GILAADESTGSIAK	14	0	1331.69	ENSMMUP00000001319;ENSMMUP00000032476;ENSMMUP00000032477;ENSMMUP00000032478;ENSMMUP00000032479	ENSMMUP00000001319	yes	no	2	0.038187	109.15		1			1		219720	0	219720	0
10341	228	GVVPLAGTNGETTTQGLDGLSER	23	0	2271.13	ENSMMUP00000001319;ENSMMUP00000032476;ENSMMUP00000032477;ENSMMUP00000032478;ENSMMUP00000032479	ENSMMUP00000001319	yes	no	2,3	2.2574e-26	148.52	3	4	3	3	4	3	726850000	164200000	317780000	244870000
11945	228	IGEHTPSALAIMENANVLAR	20	0	2106.09	ENSMMUP00000001319;ENSMMUP00000032476;ENSMMUP00000032477;ENSMMUP00000032478;ENSMMUP00000032479	ENSMMUP00000001319	yes	no	2,3	1.1117e-116	247.61	16	19	17	16	19	17	4202900000	1405300000	1546800000	1250800000
13104	228	IVAPGKGILAADESTGSIAKR	21	2	2053.15	ENSMMUP00000001319;ENSMMUP00000032476;ENSMMUP00000032477;ENSMMUP00000032478;ENSMMUP00000032479	ENSMMUP00000001319	yes	no	3	0.00057267	88.283	1			1			4913800	4913800	0	0
20614	228	PNMVTPGHACTQK	13	0	1439.66	ENSMMUP00000001319;ENSMMUP00000032476;ENSMMUP00000032477;ENSMMUP00000032478;ENSMMUP00000032479	ENSMMUP00000001319	yes	no	2	0.10593	75.589		2			2		0	0	0	0
20737	228	PYQYPALTPEQK	12	0	1433.72	ENSMMUP00000001319;ENSMMUP00000032476;ENSMMUP00000032477;ENSMMUP00000032478;ENSMMUP00000032479	ENSMMUP00000001319	yes	no	2	0.039232	56.087	2	1		2	1		26383	19081	7301.5	0
25637	228	TVPPAVTGITFLSGGQSEEEASINLNAINK	30	0	3056.57	ENSMMUP00000001319;ENSMMUP00000032476;ENSMMUP00000032477;ENSMMUP00000032478;ENSMMUP00000032479	ENSMMUP00000001319	yes	no	3,4	1.7466e-44	141.19	7	12	9	7	12	9	144120000	26206000	75846000	42070000
26005	228	VDKGVVPLAGTNGETTTQGLDGLSER	26	1	2613.32	ENSMMUP00000001319;ENSMMUP00000032476;ENSMMUP00000032477;ENSMMUP00000032478;ENSMMUP00000032479	ENSMMUP00000001319	yes	no	3	8.4632e-14	107.03	3	3	2	3	3	2	202970000	59862000	118700000	24411000
27146	228	VNPCIGGVILFHETLYQK	18	0	2087.09	ENSMMUP00000001319;ENSMMUP00000032476;ENSMMUP00000032477;ENSMMUP00000032478;ENSMMUP00000032479	ENSMMUP00000001319	yes	no	2,3	2.1065e-09	151.41	6	4	6	6	4	6	297800000	128410000	64839000	104550000
29573	228	YTPSGHAGAAASESLFVSNHAY	22	0	2236.02	ENSMMUP00000001319;ENSMMUP00000032476;ENSMMUP00000032477;ENSMMUP00000032478;ENSMMUP00000032479	ENSMMUP00000001319	yes	no	2,3	2.5927e-178	269.61	16	12	11	16	12	11	2775900000	1638000000	515490000	622430000
1117	229	ALAQGPWWAR	10	0	1154.6	ENSMMUP00000001322;ENSMMUP00000038931	ENSMMUP00000001322	yes	no	2	0.11166	72.607			1			1	5434200	0	0	5434200
2813	229	DFLTLHGLQDDEDLQALLK	19	0	2183.11	ENSMMUP00000001322	ENSMMUP00000001322	yes	yes	2,3	2.4954e-99	246.21	4	3	5	4	3	5	206420000	59271000	63368000	83785000
4901	229	EEAAGPALALSLIER	15	0	1538.83	ENSMMUP00000001322;ENSMMUP00000038931	ENSMMUP00000001322	yes	no	2	1.1597e-30	198.16	3	3	2	3	3	2	54571000	15526000	28518000	10527000
10945	229	HLQAILGPMLLNR	13	0	1474.84	ENSMMUP00000001322;ENSMMUP00000038931	ENSMMUP00000001322	yes	no	3	1.23e-07	143	1		1	1		1	2450500	0	0	2450500
12338	229	ILFCDVLR	8	0	1034.56	ENSMMUP00000001322;ENSMMUP00000038931	ENSMMUP00000001322	yes	no	2	0.0029675	109.86	1	2	1	1	2	1	1622400	0	1337900	284550
19147	229	NDFIGQSTIPLNSLK	15	0	1645.87	ENSMMUP00000001322;ENSMMUP00000038931	ENSMMUP00000001322	yes	no	2	3.7824e-05	127.57	1	1	1	1	1	1	20645000	3892000	9384500	7368800
20151	229	NTLDLIAPSPADAQHWVLGLR	21	0	2286.21	ENSMMUP00000001322;ENSMMUP00000038931	ENSMMUP00000001322	yes	no	2,3	1.7287e-29	170.06	5	5	5	5	5	5	358010000	111560000	127260000	119180000
23739	229	SQTDSLEDEEIEAFYK	16	0	1902.84	ENSMMUP00000001322;ENSMMUP00000038931	ENSMMUP00000001322	yes	no	2	2.6011e-53	216.26	3	2	1	3	2	1	49354000	21690000	17858000	9805800
24094	229	SVHFGGFSSPGTPGQAFYEMASFSENR	27	0	2893.28	ENSMMUP00000001322;ENSMMUP00000038931	ENSMMUP00000001322	yes	no	3	3.6848e-35	144.27	3	7	6	3	7	6	258770000	68079000	83490000	107200000
24601	229	TFAEAAGSGETLSVDQLVTFLQHQQR	26	0	2832.4	ENSMMUP00000001322;ENSMMUP00000038931	ENSMMUP00000001322	yes	no	3	6.7146e-28	139.02	4	3	4	4	3	4	119730000	30532000	48726000	40468000
27962	229	VYQDMGQPLSHYLVSSSHNTYLLEDQLAGPSSTEAYIR	38	0	4269.03	ENSMMUP00000001322;ENSMMUP00000038931	ENSMMUP00000001322	yes	no	3,4	2.913e-19	91.354	3	4	4	3	4	4	389820000	110910000	139490000	139410000
420	230	AEELGLPILGVLR	13	0	1378.82	ENSMMUP00000001337;ENSMMUP00000001336;ENSMMUP00000038943;ENSMMUP00000038939	ENSMMUP00000001337	yes	no	2	1.6743e-10	147.24	6	6	6	6	6	6	132540000	35509000	59323000	37708000
4236	230	DTTPDELLSAVMTAVLK	17	0	1802.93	ENSMMUP00000001337;ENSMMUP00000001336;ENSMMUP00000038943;ENSMMUP00000001334	ENSMMUP00000001337	yes	no	2,3	1.9493e-42	203.11	11	16	9	11	16	9	54626000	10364000	34293000	9968500
4342	230	DVNLRPEELGDICVGNVLQPGAGAIMAR	28	1	2963.5	ENSMMUP00000001337;ENSMMUP00000001336;ENSMMUP00000038943;ENSMMUP00000001334	ENSMMUP00000001337	yes	no	3	8.0741e-12	92.41		2			2		2971400	0	2971400	0
9055	230	GGFKDTTPDELLSAVMTAVLK	21	1	2192.14	ENSMMUP00000001337;ENSMMUP00000001336;ENSMMUP00000038943;ENSMMUP00000001334	ENSMMUP00000001337	yes	no	2,3	3.5962e-10	125.23	3	2	2	3	2	2	32615000	14794000	14714000	3107000
11496	230	IAQFLSDIPETVPLSTVNR	19	0	2099.13	ENSMMUP00000001337;ENSMMUP00000038943;ENSMMUP00000001334	ENSMMUP00000001337	yes	no	3	1.5424e-05	98.508	2	1	1	2	1	1	13452000	4237000	6778200	2437000
22965	230	SITVTQDEGIRPSTTMEGLAK	21	1	2233.13	ENSMMUP00000001337;ENSMMUP00000001336;ENSMMUP00000038943;ENSMMUP00000001334;ENSMMUP00000038939	ENSMMUP00000001337	yes	no	2,3	0.00014756	81.656	2	2	4	2	2	4	50941000	9714400	13468000	27759000
22985	230	SKAEELGLPILGVLR	15	1	1593.95	ENSMMUP00000001337;ENSMMUP00000001336;ENSMMUP00000038943;ENSMMUP00000038939	ENSMMUP00000001337	yes	no	2,3	5.7939e-07	155.57	4	4	3	4	4	3	85702000	34103000	23967000	27631000
24225	230	SYAVVGVPPDIMGIGPAYAIPIALQK	26	0	2639.44	ENSMMUP00000001337;ENSMMUP00000001336;ENSMMUP00000038943;ENSMMUP00000038939	ENSMMUP00000001337	yes	no	2,3	2.7321e-46	166.06	1	5	8	1	5	8	88764000	2648800	46222000	39894000
27150	230	VNPLGGAVALGHPLGCTGAR	20	0	1916.01	ENSMMUP00000001337;ENSMMUP00000001336;ENSMMUP00000001334;ENSMMUP00000038939	ENSMMUP00000001337	yes	no	3	0.0024684	62.861	1	2	1	1	2	1	28065000	3273700	20666000	4124900
1074	231	AKFDGIFESLLPINGLLSGDK	21	1	2233.2	ENSMMUP00000001338	ENSMMUP00000001338	yes	yes	2,3	9.8081e-11	133.1	5	5	4	5	5	4	52695000	13807000	21762000	17127000
1279	231	ALLFSNNTQELHPDPFQTEDPFK	23	0	2687.29	ENSMMUP00000001338	ENSMMUP00000001338	yes	yes	3	0.0065166	51.487	1		1	1		1	11686000	4025000	0	7661100
2943	231	DGHLDRDEFAVAMHLVYR	18	1	2143.03	ENSMMUP00000001338	ENSMMUP00000001338	yes	yes	4	0.028326	62.813			2			2	1732800	0	0	1732800
5676	231	ELDDISQEIAQLQR	14	0	1656.83	ENSMMUP00000001338	ENSMMUP00000001338	yes	yes	2	4.5843e-07	140.31			1			1	1986500	0	0	1986500
7022	231	FDEIFLK	7	0	910.48	ENSMMUP00000001338	ENSMMUP00000001338	yes	yes	2	0.074648	117.93		1			1		0	0	0	0
7034	231	FDGIFESLLPINGLLSGDK	19	0	2034.07	ENSMMUP00000001338	ENSMMUP00000001338	yes	yes	2	2.6375e-10	137.73	2	2	3	2	2	3	23349000	6540400	10061000	6747600
7365	231	FHDTSSPLMVTPPSAEAHWAVR	22	0	2435.17	ENSMMUP00000001338	ENSMMUP00000001338	yes	yes	3	0.0081056	52.814			1			1	3917100	0	0	3917100
8453	231	GADPFKGDPFQNDPFAEQQTTSTDPFGGDPFK	32	1	3457.54	ENSMMUP00000001338	ENSMMUP00000001338	yes	yes	3	2.8489e-74	163.1	2	3	5	2	3	5	74230000	9729100	28911000	35590000
8454	231	GADPFKGDPFQNDPFAEQQTTSTDPFGGDPFKESDPFR	38	2	4188.86	ENSMMUP00000001338	ENSMMUP00000001338	yes	yes	4	0.01751	41.936		1			1		19604000	0	19604000	0
9053	231	GGFGAMDDPFK	11	0	1140.49	ENSMMUP00000001338	ENSMMUP00000001338	yes	yes	2	0.011785	94.616	1	1	1	1	1	1	3009000	678160	1692000	638860
10188	231	GTPGPDSSGSLGSGEFTGVK	20	0	1835.85	ENSMMUP00000001338	ENSMMUP00000001338	yes	yes	2	0.077686	38.159		1			1		1386800	0	1386800	0
16869	231	LPLDVLGR	8	0	881.533	ENSMMUP00000001338	ENSMMUP00000001338	yes	yes	2	0.0037458	106.36	1	1		1	1		2386500	1168100	1218400	0
18800	231	MRFDEIFLK	9	1	1197.62	ENSMMUP00000001338	ENSMMUP00000001338	yes	yes	3	4.1742e-05	155.84	2	1	1	2	1	1	3618500	2664600	467190	486740
22716	231	SGLSDIILGK	10	0	1001.58	ENSMMUP00000001338	ENSMMUP00000001338	yes	yes	2	0.00061752	106.62	1	1		1	1		2631900	1157500	1474400	0
23123	231	SLEQYDQVLDGAHGASLTDLADLSEGVSLAER	32	0	3358.62	ENSMMUP00000001338	ENSMMUP00000001338	yes	yes	3,4	1.6845e-12	91.086	2	1	1	2	1	1	14026000	4230600	5908500	3886900
25415	231	TSEVQELQNDLDRETSSLQELEAQK	25	1	2889.38	ENSMMUP00000001338	ENSMMUP00000001338	yes	yes	3	8.3234e-10	93.006		1			1		10752000	0	10752000	0
26362	231	VGASEAALFLK	11	0	1104.62	ENSMMUP00000001338	ENSMMUP00000001338	yes	yes	2	0.0043857	84.687	1		1	1		1	3456600	1400600	0	2056000
4176	232	DTAEGVSQELISAGLVDGR	19	0	1915.95	ENSMMUP00000001340	ENSMMUP00000001340	yes	yes	2	2.1506e-31	188.04		1	1		1	1	19287000	0	11224000	8062500
6703	232	EVLEGLEYLHK	11	0	1328.7	ENSMMUP00000001340	ENSMMUP00000001340	yes	yes	2	2.732e-12	162.36	2	2	3	2	2	3	25723000	12187000	7757200	5779400
12651	232	IPISLVLR	8	0	909.601	ENSMMUP00000001340	ENSMMUP00000001340	yes	yes	2	0.00029731	143.61	3	3	3	3	3	3	26836000	11598000	12073000	3164500
16473	232	LLSGGSVLDIIK	12	0	1213.73	ENSMMUP00000001340	ENSMMUP00000001340	yes	yes	2	0.0010049	96.604	1	1	1	1	1	1	12349000	3327500	5152400	3868800
22767	232	SGVLDESTIATILR	14	0	1473.8	ENSMMUP00000001340	ENSMMUP00000001340	yes	yes	2	1.2009e-08	152.16	3	1	3	3	1	3	49048000	16679000	12621000	19747000
8554	235	GAVDALAAALAHISGASSFEPR	22	0	2110.08	ENSMMUP00000001350	ENSMMUP00000001350	yes	yes	3,4	1.0574e-30	165.17	4	7	6	4	7	6	36760000	11386000	14469000	10906000
16537	235	LLWGDIMELEAPLEESESQKK	21	1	2444.21	ENSMMUP00000001350	ENSMMUP00000001350	yes	yes	3	0.10929	38.417	1			1			2052600	2052600	0	0
16999	235	LQAEWHDSDWILSVPAK	17	0	1993.99	ENSMMUP00000001350	ENSMMUP00000001350	yes	yes	3	3.365e-05	118.33	1			1			7021400	7021400	0	0
23051	235	SLASVSYAAVDFFR	14	0	1531.77	ENSMMUP00000001350	ENSMMUP00000001350	yes	yes	2	0.00048873	94.728			1			1	2185900	0	0	2185900
23052	235	SLASVSYAAVDFFRPSAQR	19	1	2071.05	ENSMMUP00000001350	ENSMMUP00000001350	yes	yes	3	0.00041281	85.493	1			1			6863400	6863400	0	0
24658	235	TFSFAIPLIER	11	0	1292.71	ENSMMUP00000001350	ENSMMUP00000001350	yes	yes	2	0.047673	90.685		2			2		2302900	0	2302900	0
1164	236	ALEDFLASLR	10	0	1133.61	ENSMMUP00000001353	ENSMMUP00000001353	yes	yes	2	2.6189e-14	172.88	5	7	5	5	7	5	22027000	7156500	9629100	5241300
2134	236	AVESITSLEAIIIPYR	16	0	1773.99	ENSMMUP00000001353	ENSMMUP00000001353	yes	yes	3	0.0018733	77.527	2			2			454730	454730	0	0
5781	236	ELHPFDLHAMQNIILK	16	0	1918.01	ENSMMUP00000001353	ENSMMUP00000001353	yes	yes	2,3,4	0.00035116	92.935	1	1	2	1	1	2	11330000	1490700	4200700	5638100
5953	236	ELTSWLVGQEFELEK	15	0	1806.9	ENSMMUP00000001353	ENSMMUP00000001353	yes	yes	2	0.043305	51.03	1	1	1	1	1	1	11613000	3899200	2938100	4775800
6496	236	ESVELLLEDWHK	12	0	1496.75	ENSMMUP00000001353	ENSMMUP00000001353	yes	yes	2,3	0.0011166	95.094	2	2	1	2	2	1	17186000	9118400	5610300	2457000
6922	236	FAHHSNILLTFENRDENHLPLVPPK	25	1	2937.53	ENSMMUP00000001353	ENSMMUP00000001353	yes	yes	4,5	0.012628	56.529	2	1	1	2	1	1	33823000	21791000	8018700	4013400
7767	236	FNDLAHDVIHWIK	13	0	1606.83	ENSMMUP00000001353	ENSMMUP00000001353	yes	yes	2,3,4	6.1651e-11	154.1	4	6	4	4	6	4	15283000	2039900	10874000	2368700
10903	236	HLHESLLQQLQGSVQNLEGHVR	22	0	2521.32	ENSMMUP00000001353	ENSMMUP00000001353	yes	yes	3,4,5	2.7155e-30	158.98	3	2	4	3	2	4	32972000	6478400	12721000	13773000
15340	236	LFLDDQLK	8	0	990.539	ENSMMUP00000001353	ENSMMUP00000001353	yes	yes	2	0.017629	80.229			1			1	44891000	0	0	44891000
18122	236	MAIQGFHLIDADGIYQHLR	19	0	2197.11	ENSMMUP00000001353	ENSMMUP00000001353	yes	yes	3,4	0.0031981	63.681	1	1	2	1	1	2	21875000	12322000	3331600	6221900
18328	236	MESLETALQLVLPVEK	16	0	1798.97	ENSMMUP00000001353	ENSMMUP00000001353	yes	yes	2	2.0683e-15	171.78		1	1		1	1	2654400	0	1600800	1053600
19247	236	NEQLEEIEELYTQLEAK	17	0	2078.01	ENSMMUP00000001353	ENSMMUP00000001353	yes	yes	3	1.941e-16	173.51	1	2	1	1	2	1	6220800	1724700	3151700	1344500
19322	236	NFNDWFNNIK	10	0	1310.6	ENSMMUP00000001353	ENSMMUP00000001353	yes	yes	2	0.00019334	119.53		1	2		1	2	8003800	0	2683800	5319900
19328	236	NFQDKLETSLHVLNQIK	17	1	2026.08	ENSMMUP00000001353	ENSMMUP00000001353	yes	yes	3	0.00055247	99.991		1	1		1	1	6584200	0	3627100	2957100
19951	236	NPSFSEEPWLEIK	13	0	1574.76	ENSMMUP00000001353	ENSMMUP00000001353	yes	yes	2	9.1604e-05	114.7			1			1	1519400	0	0	1519400
22569	236	SFLDVLSIK	9	0	1020.59	ENSMMUP00000001353	ENSMMUP00000001353	yes	yes	2	1.6668e-12	176.38	3	4	2	3	4	2	6975100	2433500	2918500	1623100
23452	236	SNFFAIIR	8	0	966.529	ENSMMUP00000001353	ENSMMUP00000001353	yes	yes	2	0.040634	84.498	1			1			1035100	1035100	0	0
25085	236	TLTDISNQWDNTLHLASTYLSHQEK	25	0	2914.41	ENSMMUP00000001353	ENSMMUP00000001353	yes	yes	4	0.1082	31.314	1	1		1	1		29209000	11371000	17838000	0
27276	236	VPSLTTYEGSDLNNTLEDLR	20	0	2236.09	ENSMMUP00000001353	ENSMMUP00000001353	yes	yes	2	0.080797	37.645		1			1		12539000	0	12539000	0
28067	236	WDPDELDKDHLQLR	14	1	1778.86	ENSMMUP00000001353	ENSMMUP00000001353	yes	yes	2	7.4638e-05	126.09		1	1		1	1	6274900	0	3112700	3162300
28119	236	WESLHHELSLYVQQLK	16	0	2009.04	ENSMMUP00000001353	ENSMMUP00000001353	yes	yes	2,3,4	1.9647e-53	218.21	6	4	5	6	4	5	31763000	6728800	11919000	13114000
29518	236	YSQQVVEYDEFTTLMNK	17	0	2093.96	ENSMMUP00000001353	ENSMMUP00000001353	yes	yes	2	1.692e-07	149.52	1	2		1	2		3167200	1101000	2066200	0
2302	238	AWPEVWAGSVGR	12	0	1313.65	ENSMMUP00000001368;ENSMMUP00000001367	ENSMMUP00000001368	yes	no	2	0.0010939	95.401	1			1			3283600	3283600	0	0
4847	238	EDLLIISSFFK	11	0	1310.71	ENSMMUP00000001368;ENSMMUP00000001369	ENSMMUP00000001368	yes	no	2	9.8053e-09	156.51	1	1	1	1	1	1	1801800	569420	469610	762740
5339	238	EHEENQEDFDELPLLTFTDGEDVK	24	0	2848.26	ENSMMUP00000001368;ENSMMUP00000001367	ENSMMUP00000001368	yes	no	3	2.3715e-12	121.46	1	1	2	1	1	2	12597000	635640	4698000	7263400
17303	238	LSEGEAEEDSLDEEFFHHK	19	0	2246.96	ENSMMUP00000001368;ENSMMUP00000001369	ENSMMUP00000001368	yes	no	3,4	0.0047681	59.261		1	2		1	2	32684000	0	9834900	22849000
21510	238	REDLLIISSFFK	12	1	1466.81	ENSMMUP00000001368;ENSMMUP00000001369	ENSMMUP00000001368	yes	no	3	4.4727e-05	125.82	2	2	1	2	2	1	4454900	1111000	3091000	252870
22146	238	RYLNAYEMEALLQEMSSK	18	1	2175.03	ENSMMUP00000001368;ENSMMUP00000001369	ENSMMUP00000001368	yes	no	3	0.023582	66.335		1			1		34339	0	34339	0
28432	238	WSAEASGKPSPSDPGSGTAAMMNSSSR	27	1	2652.15	ENSMMUP00000001368;ENSMMUP00000038351;ENSMMUP00000001371	ENSMMUP00000001368	yes	no	3	0.0093296	50.783	1	1		1	1		572310	277020	295290	0
29161	238	YLNAYEMEALLQEMSSK	17	0	2018.93	ENSMMUP00000001368;ENSMMUP00000001369	ENSMMUP00000001368	yes	no	2,3	2.4074e-32	193.77	4	9	7	4	9	7	20716000	2760300	7967500	9988100
29606	238	YVGTESQGSAATHPEDDLFLWTPHTSVEPEYSYK	34	0	3840.74	ENSMMUP00000001368;ENSMMUP00000001369	ENSMMUP00000001368	yes	no	4	0.054268	26.899	1	1	1	1	1	1	108420000	32874000	38320000	37224000
28411	240	WQPGNIFTCSVMHEALHNHYTQK	23	0	2797.29	ENSMMUP00000001373	ENSMMUP00000001373	yes	yes	3,4	0.0043115	58.49	2	2	2	2	2	2	15579000	7836400	1577100	6165600
8770	241	GEISATQDVMMEEIFR	16	0	1854.85	ENSMMUP00000001376	ENSMMUP00000001376	yes	yes	2	7.1107e-31	195.38	5	3	4	5	3	4	57200000	13696000	19485000	24020000
11996	241	IGPITPLEFYR	11	0	1304.71	ENSMMUP00000001376	ENSMMUP00000001376	yes	yes	2	0.00049744	110.84	6	6	6	6	6	6	297180000	108280000	110180000	78725000
12508	242	IMNVIGEPIDER	12	0	1384.7	ENSMMUP00000001377	ENSMMUP00000001377	yes	yes	2	1.5772e-09	149.69	7	6	7	7	6	7	767310000	337450000	326160000	103690000
12509	242	IMNVIGEPIDERGPIKTK	18	2	2009.1	ENSMMUP00000001377	ENSMMUP00000001377	yes	yes	3,4	0.042293	70.281	1	2		1	2		29640000	22136000	7504100	0
12681	242	IPSAVGYQPTLATDMGTMQER	21	0	2265.08	ENSMMUP00000001377	ENSMMUP00000001377	yes	yes	2,3	2.0887e-59	202.86	3	5	4	3	5	4	1386700000	409820000	452020000	524880000
1211	243	ALGAALTPFNPLAGLR	16	0	1580.9	ENSMMUP00000001382	ENSMMUP00000001382	yes	yes	2	7.7724e-05	124.42	1	1	1	1	1	1	4318300	1768000	1016600	1533700
7075	243	FDSDAEEVENQFVESIEEWR	20	0	2457.06	ENSMMUP00000001382	ENSMMUP00000001382	yes	yes	2	3.317e-33	190.67			1			1	1806000	0	0	1806000
18461	243	MHPDIPVSVIFGAR	14	0	1537.81	ENSMMUP00000001382	ENSMMUP00000001382	yes	yes	3	8.5369e-05	111.94	1			1			2296600	2296600	0	0
1142	245	ALDLQDLPWQVK	12	0	1424.77	ENSMMUP00000001393;ENSMMUP00000001394	ENSMMUP00000001393	yes	no	2	6.533e-36	196.15	4	3	3	4	3	3	24559000	9497900	9437000	5624300
29507	245	YSLWFK	6	0	842.433	ENSMMUP00000001393;ENSMMUP00000001394	ENSMMUP00000001393	yes	no	2	0.040232	65.263			1			1	269760	0	0	269760
885	246	AHITINQYLQQVYEAIDTR	19	0	2275.16	ENSMMUP00000001401;ENSMMUP00000018126;ENSMMUP00000001397	ENSMMUP00000001401	yes	no	2,3	3.679e-80	229.02	4	4	3	4	4	3	174870000	47653000	68105000	59108000
18584	246	MLLGHMPTVELLK	13	0	1480.81	ENSMMUP00000001401;ENSMMUP00000018126;ENSMMUP00000001397;ENSMMUP00000001398	ENSMMUP00000001401	yes	no	3	0.0016611	87.184	2	1	2	2	1	2	8716700	3957200	1551700	3207800
20757	246	QAEEYLSFAFEHCHR	15	0	1922.84	ENSMMUP00000001401;ENSMMUP00000018126;ENSMMUP00000001397;ENSMMUP00000001398	ENSMMUP00000001401	yes	no	3,4	0.00014448	101.32			2			2	2567600	0	0	2567600
24803	246	THQLSLDAFLVALK	14	0	1554.88	ENSMMUP00000001401;ENSMMUP00000018126;ENSMMUP00000001397;ENSMMUP00000001398	ENSMMUP00000001401	yes	no	3	2.5854e-11	160.18	1		2	1		2	1768000	981870	0	786120
28981	246	YHLMQFAEVTR	11	0	1393.68	ENSMMUP00000001401;ENSMMUP00000018126;ENSMMUP00000001397;ENSMMUP00000001398	ENSMMUP00000001401	yes	no	3	0.0016426	97.734	1		1	1		1	13460000	10590000	0	2869700
5031	247	EEWTTAIQTVADGLK	15	0	1660.83	ENSMMUP00000001399;ENSMMUP00000032525	ENSMMUP00000001399	yes	no	2	0.0029821	74.296	1			1			2115700	2115700	0	0
6693	247	EVIVAKDEVAHTLTENR	17	1	1923.01	ENSMMUP00000001399;ENSMMUP00000032525	ENSMMUP00000001399	yes	no	3	0.0019452	87.566	1			1			315960	315960	0	0
7172	247	FFAGIVWQHVYEK	13	0	1622.82	ENSMMUP00000001399;ENSMMUP00000032525	ENSMMUP00000001399	yes	no	2	0.0046813	76.073			1			1	128120	0	0	128120
8383	247	FYGAEIVSALDYLHSEK	17	0	1940.95	ENSMMUP00000001399;ENSMMUP00000032525	ENSMMUP00000001399	yes	no	2,3	5.8569e-17	178.14	3	6	6	3	6	6	59090000	8898100	34848000	15344000
24627	247	TFHVETPEEREEWTTAIQTVADGLK	25	1	2886.4	ENSMMUP00000001399;ENSMMUP00000032525	ENSMMUP00000001399	yes	no	4	0.0049384	58.093	1		1	1		1	11511000	4422400	0	7089000
27663	247	VTMNEFEYLK	10	0	1272.61	ENSMMUP00000001399;ENSMMUP00000032525	ENSMMUP00000001399	yes	no	2	0.00027527	114.89	1	2	2	1	2	2	15834000	2365300	8054700	5414100
6382	248	ERPTYPELMQHPFFTLHESK	20	1	2486.21	ENSMMUP00000001409	ENSMMUP00000001409	yes	yes	3,4	1.6474e-13	153.36	2	2	3	2	2	3	72425000	34219000	20753000	17453000
7906	248	FPYDSWGTPFQQLK	14	0	1712.82	ENSMMUP00000001409	ENSMMUP00000001409	yes	yes	2	0.062783	68.83			2			2	3933200	0	0	3933200
22939	249	SIQADGLVWGSSK	13	0	1346.68	ENSMMUP00000001412;ENSMMUP00000001413	ENSMMUP00000001412	yes	no	2	1.2122e-07	143.05	1	1	1	1	1	1	39740000	7744300	16628000	15368000
23518	249	SPAGLQVLNDYLADK	15	0	1602.83	ENSMMUP00000001412;ENSMMUP00000001413	ENSMMUP00000001412	yes	no	2	8.7259e-99	248.25	4	5	3	4	5	3	625570000	170100000	271550000	183920000
23855	249	SSILLDVKPWDDETDMAK	18	1	2061.99	ENSMMUP00000001412;ENSMMUP00000001413	ENSMMUP00000001412	yes	no	2,3	1.6569e-18	175.39	12	12	12	12	12	12	896550000	275460000	319860000	301240000
23856	249	SSILLDVKPWDDETDMAKLEECVR	24	2	2848.36	ENSMMUP00000001412;ENSMMUP00000001413	ENSMMUP00000001412	yes	no	3	1.7461e-10	114.46	1	1		1	1		17062000	8195800	8865700	0
24255	249	SYIEGYVPSQADVAVFEAVSGPPPADLCHALR	32	0	3414.66	ENSMMUP00000001412;ENSMMUP00000001413	ENSMMUP00000001412	yes	no	3,4	6.4199e-24	109.97	8	9	9	8	9	9	514600000	139410000	208450000	166730000
1488	250	AMSYHNYVLELAQELMEK	18	0	2168.03	ENSMMUP00000001417	ENSMMUP00000001417	yes	yes	3	1.5895e-07	143.67	1	1		1	1		4830100	2100400	2729700	0
16732	250	LNSPSSLIGQALTEILQHPER	21	0	2302.23	ENSMMUP00000001417	ENSMMUP00000001417	yes	yes	3	5.6246e-05	80.316	1	1	1	1	1	1	11663000	3724700	3277600	4660800
24780	250	THHALQNYSQAVMYLQEGLR	20	0	2358.15	ENSMMUP00000001417	ENSMMUP00000001417	yes	yes	4	0.082232	70.235			1			1	315040	0	0	315040
20712	252	PVSWADETDDLEGDVSTTWHSNDDDVYR	28	0	3223.35	ENSMMUP00000001422	ENSMMUP00000001422	yes	yes	3	2.9606e-35	137.45			1			1	21946000	0	0	21946000
23609	252	SPPYTAFLGNLPYDVTEESIK	21	0	2340.15	ENSMMUP00000001422	ENSMMUP00000001422	yes	yes	2,3	1.2829e-29	172.66	8	7	9	8	7	9	120610000	37404000	42020000	41183000
1926	253	ASSDFINLLDGLLQR	15	0	1660.88	ENSMMUP00000038997;ENSMMUP00000001433	ENSMMUP00000038997	yes	no	3	1.6359e-40	203.87	1	2	1	1	2	1	1542800	449270	970450	123050
5802	253	ELIYTDSDLVVTPIIDNPK	19	0	2144.13	ENSMMUP00000038997;ENSMMUP00000001433	ENSMMUP00000038997	yes	no	3	0.099313	37.042			1			1	319590	0	0	319590
9922	254	GQHWLLDGFPR	11	0	1324.67	ENSMMUP00000001438	ENSMMUP00000001438	yes	yes	3	0.0009351	102.53	1	1	1	1	1	1	8405000	6676700	1550200	178050
11504	254	IAQNFGLQHLSSGHFLR	17	0	1924.01	ENSMMUP00000001438	ENSMMUP00000001438	yes	yes	3,4	0.025012	53.001	2		1	2		1	9462700	6366600	0	3096200
21659	254	RGQHWLLDGFPR	12	1	1480.77	ENSMMUP00000001438	ENSMMUP00000001438	yes	yes	2,3,4	0.0064348	79.693	5	2	2	5	2	2	3839700	2932800	639870	266980
27958	254	VYNLDFNPPHVHGIDDVTGEPLVQQEDDKPEAVAAR	36	1	3983.93	ENSMMUP00000001438	ENSMMUP00000001438	yes	yes	5	0.015219	36.347	1			1			7026500	7026500	0	0
7787	255	FNIPDLK	7	0	845.465	ENSMMUP00000001439	ENSMMUP00000001439	yes	yes	2	0.0066379	126.52	1	1		1	1		1956300	1747800	208540	0
10872	255	HLDSSAAAIIDAPMDIPGLNLSQQEYYPYVYYK	33	0	3744.8	ENSMMUP00000001439	ENSMMUP00000001439	yes	yes	3,4	4.431e-47	129.72	1	3	3	1	3	3	62361000	13600000	20561000	28201000
11579	255	IDCNLLEFK	9	0	1150.57	ENSMMUP00000001439	ENSMMUP00000001439	yes	yes	2	0.00084542	123.79	1	1	1	1	1	1	4546100	2270000	1669300	606800
23887	255	SSNVLSEDQDSYLCNVTLFR	20	0	2346.08	ENSMMUP00000001439	ENSMMUP00000001439	yes	yes	2	1.7055e-11	140.95		2			2		7991900	0	7991900	0
24532	255	TEFWLISAPGEK	12	0	1376.7	ENSMMUP00000001439	ENSMMUP00000001439	yes	yes	2	2.773e-09	149.23	1	2	1	1	2	1	52295000	13024000	29488000	9783700
26465	255	VGTLDVLVGLSDELAK	16	0	1627.9	ENSMMUP00000001439	ENSMMUP00000001439	yes	yes	2,3	3.4134e-22	182.33	9	10	9	9	10	9	137700000	37647000	62834000	37215000
27339	255	VQENLLANGVDLVTYITR	18	0	2017.08	ENSMMUP00000001439	ENSMMUP00000001439	yes	yes	2,3	2.2294e-74	230.05	5	5	6	5	5	6	75861000	23591000	23430000	28840000
28918	255	YGLPVNFQAMLLQPNKK	17	1	1960.06	ENSMMUP00000001439	ENSMMUP00000001439	yes	yes	3	0.015539	58.831	1	1		1	1		9073900	4365100	4708700	0
7518	257	FKVDCTPYPTISSINKR	17	2	2025.04	ENSMMUP00000001461	ENSMMUP00000001461	yes	yes	3	0.00336	100.23	1			1			15663000	15663000	0	0
9233	257	GIDYETVPINLIK	13	0	1473.81	ENSMMUP00000001461	ENSMMUP00000001461	yes	yes	2	2.0387e-05	124.12	1	1		1	1		14908000	4637500	10270000	0
11599	257	IDGITIHQSLAIIEYLEETRPTPR	24	1	2764.48	ENSMMUP00000001461	ENSMMUP00000001461	yes	yes	3,4	2.4802e-08	94.45		2	3		2	3	15475000	0	10039000	5435700
16519	257	LLVLEAFQVTHPCR	14	0	1681.9	ENSMMUP00000001461	ENSMMUP00000001461	yes	yes	3	0.002049	79.492	3	1	1	3	1	1	18037000	10317000	3774500	3945100
18504	257	MISDLIAGGIQPLQNLSVLK	20	0	2109.19	ENSMMUP00000001461	ENSMMUP00000001461	yes	yes	2,3	4.1223e-53	206.28	6	6	6	6	6	6	140920000	34016000	71451000	35453000
18757	257	MQAGKPILYSYFR	13	1	1572.81	ENSMMUP00000001461	ENSMMUP00000001461	yes	yes	2	0.001366	110.92	2	1	3	2	1	3	27060000	8802400	4661100	13597000
3316	258	DKPLELWDVR	10	1	1269.67	ENSMMUP00000001485;ENSMMUP00000035581	ENSMMUP00000001485	yes	no	3	0.045155	76.927	1			1			935950	935950	0	0
5347	258	EHFVFTDNDGQVYHLTVEGNSVK	23	0	2634.24	ENSMMUP00000001485;ENSMMUP00000035581	ENSMMUP00000001485	yes	no	3	1.2293e-06	81.878			1			1	3762100	0	0	3762100
15821	258	LIAMYNDGAEVWDTK	15	0	1724.81	ENSMMUP00000001485;ENSMMUP00000035581;ENSMMUP00000035580	ENSMMUP00000001485	yes	no	2	2.416e-05	134.81		1	1		1	1	1956500	0	1096600	859920
16330	258	LLLDPEFTLLQR	12	0	1456.83	ENSMMUP00000001485;ENSMMUP00000035581;ENSMMUP00000035580	ENSMMUP00000001485	yes	no	2	5.5413e-14	158.4	2	4	4	2	4	4	26314000	5711600	10752000	9850600
19325	258	NFPAITALEWSPSHNLK	17	0	1923.98	ENSMMUP00000001485;ENSMMUP00000035581	ENSMMUP00000001485	yes	no	2,3	0.0011535	79.013	1	2	1	1	2	1	18830000	6019100	8080100	4730900
23661	259	SQDHFHVFVGDLSPEITTEDIK	22	0	2513.21	ENSMMUP00000001495	ENSMMUP00000001495	yes	yes	3,4	5.2753e-06	86.748	1	1	1	1	1	1	43170000	14657000	11181000	17332000
4965	262	EEIQPGDIVIIDQFIDR	17	0	1999.03	ENSMMUP00000001509;ENSMMUP00000001508	ENSMMUP00000001509	yes	no	2,3	8.2708e-70	226.7	11	12	11	11	12	11	176200000	40270000	82295000	53635000
11965	262	IGIIGGTGLDDPEILEGR	18	0	1823.96	ENSMMUP00000001509;ENSMMUP00000001508	ENSMMUP00000001509	yes	no	2	1.344e-08	146.86	2	2	1	2	2	1	124250000	32345000	61173000	30730000
23232	262	SLLLTTIPQIGSTEWSETLHNLK	23	0	2580.38	ENSMMUP00000001509	ENSMMUP00000001509	yes	yes	2,3	1.5769e-07	98.391	4	4	4	4	4	4	631340000	172640000	257620000	201070000
25684	262	TWGADVINMTTVPEVVLAK	19	0	2043.07	ENSMMUP00000001509	ENSMMUP00000001509	yes	yes	2,3	7.229e-13	149.97	4	5	4	4	5	4	53335000	14431000	26374000	12530000
29594	262	YVDTPFGKPSDALILGK	17	1	1819.97	ENSMMUP00000001509;ENSMMUP00000001508	ENSMMUP00000001509	yes	no	2,3	1.0325e-15	171.26	10	10	8	10	10	8	258120000	107940000	89031000	61148000
1059	264	AKDHGLEVLGLVR	13	1	1405.8	ENSMMUP00000001529	ENSMMUP00000001529	yes	yes	3	0.0031608	97.463	1	1	1	1	1	1	11596000	4696500	3020800	3878800
3020	264	DGVGGLPTFLENSFIGSAR	19	0	1935.97	ENSMMUP00000001529	ENSMMUP00000001529	yes	yes	2,3	2.1118e-31	188.1	7	8	8	7	8	8	112260000	32608000	54939000	24715000
5919	264	ELREELGEAAAAFR	14	1	1560.79	ENSMMUP00000001529	ENSMMUP00000001529	yes	yes	2,3	3.6748e-05	131.35	1	2		1	2		10064000	2732900	7330700	0
6303	264	EQLLEALQDLGLLQSGSISGLK	22	0	2311.26	ENSMMUP00000001529	ENSMMUP00000001529	yes	yes	2,3	1.874e-115	242.59	8	6	5	8	6	5	212430000	66022000	100460000	45947000
10513	264	HACHALLYAPDPGMLFGR	18	0	2024.97	ENSMMUP00000001529	ENSMMUP00000001529	yes	yes	2,3,4	2.0238e-06	125.28	6	4	4	6	4	4	47222000	12358000	7173200	27691000
17570	264	LTLEQLLAVEAGATR	15	0	1583.89	ENSMMUP00000001529	ENSMMUP00000001529	yes	yes	2	3.988e-05	124.46		1	1		1	1	3915100	0	1874300	2040800
21795	264	RLELGEALALGSGWR	15	1	1626.88	ENSMMUP00000001529	ENSMMUP00000001529	yes	yes	2,3	4.2993e-05	133.28	3	4	3	3	4	3	31069000	17480000	10221000	3367400
21852	264	RLTLEQLLAVEAGATR	16	1	1739.99	ENSMMUP00000001529	ENSMMUP00000001529	yes	yes	2,3	1.3042e-10	166.04	2	2	3	2	2	3	22758000	14107000	3640700	5011000
2144	265	AVFLHPEPFSIENGLLTPTLK	21	0	2322.26	ENSMMUP00000001532;ENSMMUP00000001534;ENSMMUP00000001535	ENSMMUP00000001532	yes	no	3	5.805e-11	129.11	3	3	4	3	3	4	123560000	44593000	39350000	39619000
4071	265	DSFWDKLIFAK	11	1	1368.71	ENSMMUP00000001532;ENSMMUP00000001534;ENSMMUP00000001535	ENSMMUP00000001532	yes	no	3	1.8969e-18	179.1	1	1		1	1		991400	203530	787870	0
8519	265	GAMITHQNIVSNASAFLK	18	0	1900.98	ENSMMUP00000001532;ENSMMUP00000001534;ENSMMUP00000001535	ENSMMUP00000001532	yes	no	3	8.7672e-05	92.8	1	1		1	1		17990000	8692900	9297100	0
10469	265	GYLKDPEKTQEALDSDGWLHTGDIGR	26	2	2900.39	ENSMMUP00000001532;ENSMMUP00000001534;ENSMMUP00000001535	ENSMMUP00000001532	yes	no	3,4,5	6.9773e-13	104.81	3	2	1	3	2	1	59464000	25562000	29963000	3939800
16081	265	LLADDMNTLKPTLFPTVPR	19	1	2141.16	ENSMMUP00000001532;ENSMMUP00000001534;ENSMMUP00000001535	ENSMMUP00000001532	yes	no	3	1.1463e-06	118.21	3	2	2	3	2	2	26675000	9697700	8824300	8152800
19840	265	NNDLISHCFSDATTMYEVFQR	21	0	2547.12	ENSMMUP00000001532;ENSMMUP00000001534;ENSMMUP00000001535	ENSMMUP00000001532	yes	no	3	5.5109e-11	129.46	2	1	1	2	1	1	47430000	18024000	16513000	12893000
22695	265	SGIEILSLYDAENLGK	16	0	1720.89	ENSMMUP00000001532;ENSMMUP00000001534;ENSMMUP00000001535	ENSMMUP00000001532	yes	no	2	1.6626e-141	276.64	3	3	2	3	3	2	35684000	9006600	15132000	11545000
23786	265	SRPVLQIFVHGESLR	15	1	1736.97	ENSMMUP00000001532;ENSMMUP00000001534;ENSMMUP00000001535	ENSMMUP00000001532	yes	no	3,4	9.5311e-05	134.9	1	2	2	1	2	2	25188000	9998400	15190000	0
27775	265	VVILMDPFDDDLK	13	0	1518.76	ENSMMUP00000001532;ENSMMUP00000001534;ENSMMUP00000001535	ENSMMUP00000001532	yes	no	2	5.3279e-08	145.31	2	3	4	2	3	4	20088000	3368500	5417900	11301000
27776	265	VVILMDPFDDDLKQR	15	1	1802.92	ENSMMUP00000001532;ENSMMUP00000001534;ENSMMUP00000001535	ENSMMUP00000001532	yes	no	3	0.039173	64.55	1			1			17966000	17966000	0	0
11130	267	HQLGGPVWAEPIHDLDFVGR	20	0	2242.13	ENSMMUP00000001548;ENSMMUP00000001549	ENSMMUP00000001548	yes	no	3,4	1.4074e-05	109.79	2	3	2	2	3	2	37395000	18085000	10752000	8557200
11452	267	IAFPSANEVFYNPVQEFNR	19	0	2241.09	ENSMMUP00000001548;ENSMMUP00000001549	ENSMMUP00000001548	yes	no	3	9.0752e-05	86.479	1			1			914560	914560	0	0
24322	267	TAAVGEICEEGLHVLEGLAASGLR	24	0	2451.24	ENSMMUP00000001548;ENSMMUP00000001549	ENSMMUP00000001548	yes	no	3	1.0406e-06	82.8	1			1			657380	657380	0	0
24425	267	TDAPASALWDIMR	13	0	1445.7	ENSMMUP00000001548;ENSMMUP00000001549	ENSMMUP00000001548	yes	no	2	9.8711e-11	151.7	4	3	3	4	3	3	29042000	9767900	11107000	8166500
18678	268	MNIDDKLEGLFLK	13	1	1534.81	ENSMMUP00000001560;ENSMMUP00000039830;ENSMMUP00000039829	ENSMMUP00000001560	yes	no	2	3.9748e-41	206.32	5	5	5	5	5	5	42687000	12908000	17337000	12442000
20237	268	NVIPDEVLQTLLDHYSHK	18	0	2120.09	ENSMMUP00000001560;ENSMMUP00000039830;ENSMMUP00000039827	ENSMMUP00000001560	yes	no	3,4	0.0003525	82.59	1	2	4	1	2	4	14471000	2392700	9298400	2780000
23415	268	SMPHQEILAADEVLQESEMR	20	0	2312.08	ENSMMUP00000001560;ENSMMUP00000039830;ENSMMUP00000039829	ENSMMUP00000001560	yes	no	3	0.086894	69.081		1			1		811490	0	811490	0
23465	268	SNHDKNVIPDEVLQTLLDHYSHK	23	1	2701.35	ENSMMUP00000001560;ENSMMUP00000039830;ENSMMUP00000039827	ENSMMUP00000001560	yes	no	5	0.00026106	71.073	2	2	2	2	2	2	14673000	2417900	11010000	1245300
9321	269	GISISSTESEHTGPGWESAR	20	0	2086.96	ENSMMUP00000001567;ENSMMUP00000036406;ENSMMUP00000036407	ENSMMUP00000001567	yes	no	2,3	9.5616e-06	111.22	3		2	3		2	166840000	7731200	0	159110000
9424	269	GLATSLQNDLQEVPK	15	0	1611.85	ENSMMUP00000001567;ENSMMUP00000036406;ENSMMUP00000036407	ENSMMUP00000001567	yes	no	2	3.415e-22	187.16	2	1	2	2	1	2	42809000	11856000	18174000	12779000
25810	269	VAHNILSGASWVSWGLIK	18	0	1937.05	ENSMMUP00000001567;ENSMMUP00000036406;ENSMMUP00000036407	ENSMMUP00000001567	yes	no	3	3.932e-05	100.23		1			1		1755800	0	1755800	0
4028	270	DRFGIDDQDYLVSLTR	16	1	1911.93	ENSMMUP00000001570;ENSMMUP00000001571	ENSMMUP00000001570	yes	no	3	0.0002222	117.2	1	2		1	2		8439000	2548700	5890300	0
7289	270	FGIDDQDYLVSLTR	14	0	1640.8	ENSMMUP00000001570;ENSMMUP00000001571	ENSMMUP00000001570	yes	no	2	1.497e-07	145.1	1	2	2	1	2	2	14862000	2580400	7039400	5241900
7543	270	FLDFITNIFA	10	0	1199.62	ENSMMUP00000001570;ENSMMUP00000001571	ENSMMUP00000001570	yes	no	2	8.4106e-08	157.66	3	3	3	3	3	3	1762100	330510	1050400	381210
12485	270	IMDYSLLLGIHDIIR	15	0	1770.97	ENSMMUP00000001570;ENSMMUP00000001571	ENSMMUP00000001570	yes	no	3	9.0595e-05	132.86	1	2	2	1	2	2	6019000	131630	5543100	344260
27548	270	VSVDNEDSYMLVMR	14	0	1656.75	ENSMMUP00000001570;ENSMMUP00000001571	ENSMMUP00000001570	yes	no	2	0.0020001	79.614	1	1	2	1	1	2	8336200	2429200	2933000	2974000
3862	271	DPDWLAQLFIK	11	0	1344.71	ENSMMUP00000001575	ENSMMUP00000001575	yes	yes	2	0.00011041	128.28	1		2	1		2	1049000	223720	0	825290
22430	271	SEHVVSEFGDSYFEELR	17	0	2028.91	ENSMMUP00000001575	ENSMMUP00000001575	yes	yes	3	9.5973e-08	153.23	1	1		1	1		5854600	3778800	2075800	0
14226	272	KQNEAAK	7	1	787.419	ENSMMUP00000001581	ENSMMUP00000001581	yes	yes	2	0.029919	81.635	2	1	2	2	1	2	23059000	8749100	4217600	10092000
17191	272	LQTPNTFPK	9	0	1044.56	ENSMMUP00000001581	ENSMMUP00000001581	yes	yes	2	0.13263	47.603	1			1			199940	199940	0	0
19555	272	NKPGPYSSVPPPSAPLPK	18	1	1831.98	ENSMMUP00000001581	ENSMMUP00000001581	yes	yes	2,3	0.0062388	71.354	2			2			1026900	1026900	0	0
27819	272	VVPSDLYPLVLGFLR	15	0	1686.97	ENSMMUP00000001581	ENSMMUP00000001581	yes	yes	2,3	0.00018428	98.902	2	1		2	1		1549300	1384900	164390	0
8840	273	GFAFVYFENVDDAK	14	0	1620.75	ENSMMUP00000001584;ENSMMUP00000038896;ENSMMUP00000038899	ENSMMUP00000001584	yes	no	2	1.3263e-08	151.54	12	6	10	12	6	10	627620000	214570000	197280000	215770000
28932	273	YGPIADVSIVYDQQSR	16	0	1809.89	ENSMMUP00000001584;ENSMMUP00000038896;ENSMMUP00000038899	ENSMMUP00000001584	yes	no	2	2.1433e-05	139.66	6	4	6	6	4	6	347040000	138580000	111840000	96619000
14947	274	LDPGLIMEQVK	11	0	1241.67	ENSMMUP00000001594	ENSMMUP00000001594	yes	yes	2	0.0078977	76.332	2	1	1	2	1	1	14811000	8169300	4085300	2556400
27354	274	VQIAVANAQELLQR	14	0	1551.87	ENSMMUP00000001594	ENSMMUP00000001594	yes	yes	2	2.1299e-18	180.11	1	1	1	1	1	1	21328000	10139000	3217700	7971800
797	275	AGQMVTVWAAGAGVAHSPPSTLVWK	25	0	2520.29	ENSMMUP00000001595	ENSMMUP00000001595	yes	yes	2,3	2.8815e-27	136.68	3	3	6	3	3	6	404450000	97652000	132720000	174080000
4337	275	DVMQQQLAEYQELLDVK	17	0	2049.01	ENSMMUP00000001595	ENSMMUP00000001595	yes	yes	2,3	2.1036e-56	223.06	11	18	19	11	18	19	1855900000	557570000	830980000	467390000
6092	275	ENENGEEEEEEAEFGEEDLFHQQGDPR	27	0	3191.27	ENSMMUP00000001595	ENSMMUP00000001595	yes	yes	3	4.9954e-08	86.625	2	2	3	2	2	3	42991000	9255600	17878000	15857000
6268	275	EQEMTEMRDVMQQQLAEYQELLDVK	25	1	3083.43	ENSMMUP00000001595	ENSMMUP00000001595	yes	yes	3,4	3.2618e-138	235.98	8	10		8	10		65794000	19519000	46275000	0
9466	275	GLESDVAELR	10	0	1087.55	ENSMMUP00000001595	ENSMMUP00000001595	yes	yes	2	0.057092	79.659		1			1		554110	0	554110	0
14636	275	LALDMEINAYR	11	0	1307.65	ENSMMUP00000001595	ENSMMUP00000001595	yes	yes	2	1.5786e-08	151.79	6	8	10	6	8	10	153910000	40015000	88979000	24917000
14637	275	LALDMEINAYRK	12	1	1435.75	ENSMMUP00000001595	ENSMMUP00000001595	yes	yes	2,3	1.4625e-05	133.07	5	10	2	5	10	2	151170000	59553000	83631000	7984700
15217	275	LESLSYQLSGLQK	13	0	1464.78	ENSMMUP00000001595	ENSMMUP00000001595	yes	yes	2,3	5.1829e-67	232.5	5	4	3	5	4	3	426750000	160890000	185150000	80718000
18140	275	MAQALEELR	9	0	1059.54	ENSMMUP00000001595	ENSMMUP00000001595	yes	yes	2	0.063973	90.827	1			1			0	0	0	0
18806	275	MRLESLSYQLSGLQK	15	1	1751.92	ENSMMUP00000001595	ENSMMUP00000001595	yes	yes	2,3	1.5105e-05	145.43	13	15	4	13	15	4	424460000	221550000	182160000	20745000
21019	275	QILEGEEIAYK	11	0	1291.67	ENSMMUP00000001595	ENSMMUP00000001595	yes	yes	2	0.0014142	99.283	2		2	2		2	23139000	6949400	0	16189000
21800	275	RLEVEEPLGSGPSVLGTGTGGGGGFHLAQQASASGSVSIEEIDLEGK	47	1	4579.27	ENSMMUP00000001595	ENSMMUP00000001595	yes	yes	4	0.0096647	32.145		2	2		2	2	44065000	0	26106000	17959000
22502	275	SEVELAAALSDK	12	0	1231.63	ENSMMUP00000001595	ENSMMUP00000001595	yes	yes	2	0.003334	138.24			1			1	934060	0	0	934060
22503	275	SEVELAAALSDKR	13	1	1387.73	ENSMMUP00000001595	ENSMMUP00000001595	yes	yes	2	7.1447e-05	120.87			1			1	250230	0	0	250230
25625	275	TVLVNADGEEVAMR	14	0	1502.74	ENSMMUP00000001595	ENSMMUP00000001595	yes	yes	2	5.4064e-09	155.43	3	2	2	3	2	2	113190000	21170000	46126000	45891000
419	277	AEELFLWVPR	10	0	1258.67	ENSMMUP00000001602;ENSMMUP00000001603;ENSMMUP00000001604	ENSMMUP00000001602	yes	no	2	0.00017294	120.68	1	1	1	1	1	1	6528000	2377800	1441400	2708800
1550	277	ANPNSFWQPYIQTLPSEYDTPLYFEEDEVR	30	0	3647.67	ENSMMUP00000001602;ENSMMUP00000001603;ENSMMUP00000001604	ENSMMUP00000001602	yes	no	3	2.2758e-05	63.372	1	1		1	1		13448000	6625900	6821900	0
3155	277	DIKAEELFLWVPR	13	1	1614.88	ENSMMUP00000001602;ENSMMUP00000001603;ENSMMUP00000001604	ENSMMUP00000001602	yes	no	3	0.00038865	113.99	1	1		1	1		1413900	596190	817690	0
11890	277	IFTLGNSEFPVSWDNEVK	18	0	2081.01	ENSMMUP00000001602;ENSMMUP00000001603	ENSMMUP00000001602	yes	no	2	0.00016232	89.468	1	1		1	1		2959600	1186400	1773300	0
17923	277	LWTFLEDR	8	0	1078.54	ENSMMUP00000001602;ENSMMUP00000001603	ENSMMUP00000001602	yes	no	2	0.0081179	91.069	1		1	1		1	4453800	2611100	0	1842700
23434	277	SNAEFVIHSGFFFDNNSHDR	20	0	2339.04	ENSMMUP00000001602;ENSMMUP00000001603	ENSMMUP00000001602	yes	no	3	3.5511e-05	102.89			1			1	2680500	0	0	2680500
2173	278	AVHSNPGDPALWSLLSR	17	0	1818.94	ENSMMUP00000001610	ENSMMUP00000001610	yes	yes	2,3	2.0981e-06	145.69	1	2	2	1	2	2	24553000	7361400	8879600	8311800
2667	278	DDYELIDVLVNNAK	14	0	1619.8	ENSMMUP00000001610	ENSMMUP00000001610	yes	yes	2,3	8.9164e-06	131.53	1	2		1	2		1413900	63436	1350500	0
2824	278	DFNCWESLGEAYLSR	15	0	1845.8	ENSMMUP00000001610	ENSMMUP00000001610	yes	yes	2	2.81e-07	153.22	1	2	1	1	2	1	8485600	2418400	4503200	1564000
28449	278	WSLSQAVTGLIDTGR	15	0	1602.84	ENSMMUP00000001610	ENSMMUP00000001610	yes	yes	2,3	2.0329e-10	163.91	2	3	1	2	3	1	37481000	8824100	19832000	8825100
1358	279	ALREPYMDEIFHLPQAQR	18	1	2213.11	ENSMMUP00000001619	ENSMMUP00000001619	yes	yes	3,4	8.2192e-06	115.82	4	3	3	4	3	3	50079000	20879000	18574000	10626000
6251	279	EPYMDEIFHLPQAQR	15	0	1872.88	ENSMMUP00000001619	ENSMMUP00000001619	yes	yes	3	0.054189	47.915	1	1	2	1	1	2	12998000	2834300	1578600	8585300
3027	280	DGVTPIKDLTAHFR	14	1	1568.83	ENSMMUP00000001627	ENSMMUP00000001627	yes	yes	3	0.045485	65.895	1			1			3910500	3910500	0	0
3410	280	DLEIMQILTR	10	0	1230.66	ENSMMUP00000001627	ENSMMUP00000001627	yes	yes	2	1.6873e-05	132.17	2	2	3	2	2	3	4283500	890250	1185200	2208100
8304	283	FVPIQTEEMELAIFEK	16	0	1922.97	ENSMMUP00000001662;ENSMMUP00000001663	ENSMMUP00000001662	yes	no	2	0.025337	54.368	1	1		1	1		3552700	1937700	1615000	0
11978	283	IGLFFWPK	8	0	1006.56	ENSMMUP00000001662;ENSMMUP00000001663;ENSMMUP00000023055;ENSMMUP00000023058	ENSMMUP00000001662	yes	no	2	0.001576	117.93	1	1	1	1	1	1	1981000	289230	1415000	276800
18609	283	MLSFFR	6	0	799.405	ENSMMUP00000001662;ENSMMUP00000001663	ENSMMUP00000001662	yes	no	2	0.028672	95.957	1			1			222740	222740	0	0
27500	283	VSLLDGTDVSVDLPK	15	0	1556.83	ENSMMUP00000001662;ENSMMUP00000001663	ENSMMUP00000001662	yes	no	2	0.025116	94.717	1			1			1124400	1124400	0	0
28259	283	WLEMYGVDMHVVK	13	0	1605.77	ENSMMUP00000001662;ENSMMUP00000001663	ENSMMUP00000001662	yes	no	3	0.00087097	96.103	1		1	1		1	3246700	2129300	0	1117400
5502	284	EIRPNSTVQWEEVCRPWVSGPR	22	2	2681.31	ENSMMUP00000001668	ENSMMUP00000001668	yes	yes	4	0.00013078	86.8	1	1	1	1	1	1	36590000	13419000	12976000	10195000
6537	284	ETFDVTLEPLSFK	13	0	1524.77	ENSMMUP00000001668	ENSMMUP00000001668	yes	yes	2	1.4112e-18	174.73	2	2	2	2	2	2	38439000	10952000	17875000	9612200
10221	284	GTYIPVPIVSELQSGK	16	0	1686.92	ENSMMUP00000001668	ENSMMUP00000001668	yes	yes	2	6.6326e-05	121.79	3	3	2	3	3	2	70772000	20527000	32269000	17976000
10302	284	GVNLQEFLNVTSIHLFK	17	0	1958.06	ENSMMUP00000001668	ENSMMUP00000001668	yes	yes	2,3	4.7925e-05	110.22	3	4	5	3	4	5	27521000	5721200	11225000	10574000
11348	284	HVYGELDVQIQR	12	0	1455.75	ENSMMUP00000001668	ENSMMUP00000001668	yes	yes	3	3.6312e-05	124.67		1			1		989110	0	989110	0
14642	284	LALETALMYGAK	12	0	1279.68	ENSMMUP00000001668	ENSMMUP00000001668	yes	yes	2	2.2652e-21	179.19	1	2	2	1	2	2	37237000	9106600	17991000	10140000
19906	284	NPETDTYILFNPWCEDDAVYLDNEKER	27	1	3345.48	ENSMMUP00000001668	ENSMMUP00000001668	yes	yes	3	4.135e-23	122.47	1		1	1		1	31965000	15881000	0	16084000
20276	284	NVWIHLDGPGITR	13	0	1476.78	ENSMMUP00000001668	ENSMMUP00000001668	yes	yes	2,3	4.6511e-11	155.08	4	2	3	4	2	3	93940000	39072000	20487000	34382000
20277	284	NVWIHLDGPGITRPMR	16	1	1860.98	ENSMMUP00000001668	ENSMMUP00000001668	yes	yes	3	0.0087591	76.01	2	2		2	2		16603000	7839000	8763800	0
2542	286	DAMWELLTNESANHSWDVLCR	21	0	2546.13	ENSMMUP00000001688;ENSMMUP00000034130;ENSMMUP00000034128	ENSMMUP00000001688	yes	no	3	0.002036	62.658			1			1	1124000	0	0	1124000
7302	286	FGLLPLSMTSTR	12	0	1321.71	ENSMMUP00000001688;ENSMMUP00000034130;ENSMMUP00000034128	ENSMMUP00000001688	yes	no	2	0.046447	54.471	1			1			1583800	1583800	0	0
14920	286	LDLRDPAALFETHGAEEIR	19	1	2152.09	ENSMMUP00000001688;ENSMMUP00000034130	ENSMMUP00000001688	yes	no	4	0.013937	62.813	1	1		1	1		7351900	5719700	1632200	0
20777	286	QALTDFLLAR	10	0	1146.64	ENSMMUP00000001688;ENSMMUP00000034130;ENSMMUP00000034128	ENSMMUP00000001688	yes	no	2	0.0098417	78.488			1			1	161620	0	0	161620
26692	286	VKLDDLLAYLPSDDSSLPK	19	1	2088.1	ENSMMUP00000001688;ENSMMUP00000034130;ENSMMUP00000034128	ENSMMUP00000001688	yes	no	3	6.8013e-05	93.768	3	3	2	3	3	2	21517000	7502000	7276000	6739200
27601	286	VTDHLEALIDPFDLDVFTPHLNSNLHR	27	0	3127.57	ENSMMUP00000001688;ENSMMUP00000034130;ENSMMUP00000034128	ENSMMUP00000001688	yes	no	5	0.0085911	45.423	1	1	1	1	1	1	6129300	1323100	4148000	658230
4600	287	EAFFHQELPLYIPPPIFSR	19	0	2300.2	ENSMMUP00000001694;ENSMMUP00000001696;ENSMMUP00000001699;ENSMMUP00000001697	ENSMMUP00000001694	yes	no	2,3	1.2452e-40	194.37	2	2	4	2	2	4	15954000	6635700	2720200	6598100
13281	287	IYQVLDFR	8	0	1052.57	ENSMMUP00000001694;ENSMMUP00000001696;ENSMMUP00000001699;ENSMMUP00000001697;ENSMMUP00000001698;ENSMMUP00000040068	ENSMMUP00000001694	yes	no	2	0.0084598	90.657		1	1		1	1	2201400	0	1481900	719490
14809	287	LDAPVDYFYRPETQHR	16	1	2005.96	ENSMMUP00000001694;ENSMMUP00000001696;ENSMMUP00000001699;ENSMMUP00000001697	ENSMMUP00000001694	yes	no	2,3,4	0.008137	76.728	3		1	3		1	22882000	13825000	0	9057400
15258	287	LFDIRPIWSR	10	1	1301.72	ENSMMUP00000001694;ENSMMUP00000001696;ENSMMUP00000001699;ENSMMUP00000001698	ENSMMUP00000001694	yes	no	3	0.11839	65.347	1			1			908030	908030	0	0
1135	290	ALDGNVYDHLKDYLIAFSR	19	1	2209.12	ENSMMUP00000001730	ENSMMUP00000001730	yes	yes	3,4	0.040915	55.864	1	1	2	1	1	2	2792700	606100	1375800	810840
1920	290	ASQPDELTIEEHEVLEVIEDGDMEDWVK	28	0	3254.48	ENSMMUP00000001730	ENSMMUP00000001730	yes	yes	3	0.00083121	55.171			1			1	178780	0	0	178780
1041	291	AIVEDCSGIQFAPYTWSYPEIDKDFESSGLDR	32	1	3694.68	ENSMMUP00000001740	ENSMMUP00000001740	yes	yes	3	1.6462e-23	111.4		1	1		1	1	20325000	0	13063000	7261800
13325	291	KAEGDLGSSWVCGFSNLESQVLEK	24	1	2639.25	ENSMMUP00000001740	ENSMMUP00000001740	yes	yes	3	1.6325e-10	113.42	1	1	1	1	1	1	37734000	12876000	14717000	10141000
16385	291	LLNDSVFFLAAYDLR	15	0	1755.92	ENSMMUP00000001740	ENSMMUP00000001740	yes	yes	3	0.12545	68.044			1			1	157030	0	0	157030
19870	291	NNWNDVDDFNWLAR	14	0	1777.78	ENSMMUP00000001740	ENSMMUP00000001740	yes	yes	2	2.7246e-22	182.02	1	1	2	1	1	2	65857000	18113000	20318000	27426000
23021	291	SKNNWNDVDDFNWLAR	16	1	1992.91	ENSMMUP00000001740	ENSMMUP00000001740	yes	yes	2,3	7.8969e-05	140.22	2	1	2	2	1	2	9218800	5900200	1400300	1918400
315	293	ADIWSLGITAIELAK	15	0	1599.89	ENSMMUP00000001755	ENSMMUP00000001755	no	no	2,3	3.8646e-66	226.19	5	2	5				20024000	8159500	4342600	7522300
316	294	ADIWSLGITAIELAR	15	0	1627.89	ENSMMUP00000012025;ENSMMUP00000036125;ENSMMUP00000036121;ENSMMUP00000001756;ENSMMUP00000036122	ENSMMUP00000012025	yes	no	2,3	3.0713e-99	254.1	7	6	7	7	6	7	84395000	21489000	40978000	21928000
3891	294	DPKNLENGALQPSDLDR	17	1	1880.92	ENSMMUP00000012025;ENSMMUP00000036125;ENSMMUP00000036121;ENSMMUP00000001756;ENSMMUP00000036122	ENSMMUP00000012025	yes	no	3	0.028392	62.813		1			1		7689200	0	7689200	0
21924	294	RPFSQCLSTIISPLFAELK	19	1	2206.18	ENSMMUP00000012025;ENSMMUP00000036125;ENSMMUP00000036121;ENSMMUP00000001756	ENSMMUP00000012025	yes	no	2,3	0.0001002	88.565	2		1	2		1	4486400	2119800	0	2366600
25492	294	TSYLTELIDR	10	0	1209.62	ENSMMUP00000012025;ENSMMUP00000036125;ENSMMUP00000036121;ENSMMUP00000001756;ENSMMUP00000036122	ENSMMUP00000012025	no	no	2	2.0355e-09	159.09	2	2	2				36601000	28737000	5096900	2766200
169	295	AAQAPSSFQLLYDLK	15	0	1650.86	ENSMMUP00000001760;ENSMMUP00000001759;ENSMMUP00000032870	ENSMMUP00000001760	yes	no	2	1.7703e-15	176.25	2	3	3	2	3	3	122520000	24146000	60250000	38128000
1849	295	ASFITPVPGGVGPMTVAMLMQSTVESAK	28	0	2805.41	ENSMMUP00000001760;ENSMMUP00000001759;ENSMMUP00000032870	ENSMMUP00000001760	yes	no	2,3	1.4214e-35	142.45	9	10	12	9	10	12	300900000	60026000	126570000	114300000
2340	295	AYIEENLELVEK	12	0	1448.74	ENSMMUP00000001760;ENSMMUP00000001759;ENSMMUP00000032870	ENSMMUP00000001760	yes	no	2	7.4417e-05	122.39	1	1	1	1	1	1	11249000	3378300	5566200	2304600
2517	295	DAIKPNLMQTLEGTPVFVHAGPFANIAHGNSSILADR	37	1	3900.99	ENSMMUP00000001760;ENSMMUP00000001759;ENSMMUP00000032870	ENSMMUP00000001760	yes	no	3,4	0.0041577	39.295	3	1		3	1		49857000	44524000	5333000	0
5027	295	EEVPGFIPGLAILQIGNR	18	0	1922.06	ENSMMUP00000001760;ENSMMUP00000001759;ENSMMUP00000032870	ENSMMUP00000001760	yes	no	2,3	1.2937e-46	204.35	10	12	10	10	12	10	169300000	27690000	63984000	77623000
5443	295	EIGLLSEEVELYGETK	16	0	1807.91	ENSMMUP00000001760;ENSMMUP00000001759;ENSMMUP00000032870	ENSMMUP00000001760	yes	no	2	8.5896e-17	179.79	1	1	1	1	1	1	35680000	8548200	14646000	12486000
10312	295	GVPTGFVLPIR	11	0	1154.68	ENSMMUP00000001760;ENSMMUP00000001759;ENSMMUP00000032870	ENSMMUP00000001760	yes	no	2	1.1331e-05	140.49	4	4	3	4	4	3	75370000	30826000	32468000	12076000
13134	295	IVGAPMHDLLLWNNATVTTCHSK	23	0	2577.28	ENSMMUP00000001760;ENSMMUP00000001759;ENSMMUP00000032870	ENSMMUP00000001760	yes	no	3,4	1.1405e-06	82.765	3	1	1	3	1	1	54290000	30815000	9535000	13940000
13247	295	IYGADDIELLPEAQHK	16	0	1810.91	ENSMMUP00000001760;ENSMMUP00000001759;ENSMMUP00000032870	ENSMMUP00000001760	yes	no	2,3	5.8942e-05	118.2	3	3	4	3	3	4	69231000	41582000	18918000	8730900
13636	295	KGEPVSAEDLGVSGALTVLMK	21	1	2100.11	ENSMMUP00000001760;ENSMMUP00000001759;ENSMMUP00000032870	ENSMMUP00000001760	yes	no	3	0.00040638	73.11		1	2		1	2	11924000	0	5077200	6846400
14871	295	LDIDPETITWQR	12	0	1485.75	ENSMMUP00000001760;ENSMMUP00000001759;ENSMMUP00000032870	ENSMMUP00000001760	yes	no	2	1.3895e-09	150.69	3	1	3	3	1	3	64986000	44780000	12201000	8004500
16038	295	LKNQVTQLKEEVPGFIPGLAILQIGNR	27	2	2974.7	ENSMMUP00000001760;ENSMMUP00000001759;ENSMMUP00000032870	ENSMMUP00000001760	yes	no	4	1.5384e-06	85.35	2	1		2	1		12307000	9698800	2607900	0
18360	295	MFGIPVVVAVNAFK	14	0	1490.83	ENSMMUP00000001760;ENSMMUP00000001759;ENSMMUP00000032870	ENSMMUP00000001760	yes	no	2	1.8988e-05	125.97	3	4	4	3	4	4	45214000	13953000	15995000	15266000
18455	295	MHGGGPTVTAGLPLPK	16	0	1531.82	ENSMMUP00000001760;ENSMMUP00000001759;ENSMMUP00000032870	ENSMMUP00000001760	yes	no	3	0.023765	54.898	1			1			10321000	10321000	0	0
20025	295	NQVTQLKEEVPGFIPGLAILQIGNR	25	1	2733.52	ENSMMUP00000001760;ENSMMUP00000001759;ENSMMUP00000032870	ENSMMUP00000001760	yes	no	3	8.8936e-27	139	2	1	1	2	1	1	79530000	24827000	27377000	27326000
24373	295	TANLNEEVNKGDILVVATGQPEMVK	25	1	2668.37	ENSMMUP00000001760;ENSMMUP00000001759;ENSMMUP00000032870	ENSMMUP00000001760	yes	no	3	4.0749e-06	82.635		1			1		3564200	0	3564200	0
24489	295	TDTEAELDLISR	12	0	1361.67	ENSMMUP00000001760;ENSMMUP00000001759;ENSMMUP00000032870	ENSMMUP00000001760	yes	no	2	0.024231	92.295		1			1		0	0	0	0
28338	295	WMIEYNNLNLK	11	0	1436.71	ENSMMUP00000001760;ENSMMUP00000001759;ENSMMUP00000032870	ENSMMUP00000001760	yes	no	2	0.00015527	124.67	2	1	2	2	1	2	58637000	23442000	10085000	25110000
29642	295	YVVVTGITPTPLGEGK	16	0	1629.9	ENSMMUP00000001760;ENSMMUP00000001759;ENSMMUP00000032870	ENSMMUP00000001760	yes	no	2	4.0774e-41	204.28	1	2	1	1	2	1	77075000	21078000	36274000	19723000
6218	296	EPLRVDLADLLTENPELFR	19	1	2239.18	ENSMMUP00000001781	ENSMMUP00000001781	yes	yes	2,3	3.6239e-115	249.47	5	6	5	5	6	5	181820000	58903000	91330000	31589000
19050	296	NAEEFTLQYGVDRPS	15	1	1724.8	ENSMMUP00000001781	ENSMMUP00000001781	yes	yes	2	0.00015175	116.35			1			1	2441800	0	0	2441800
19754	296	NLSSSDANVLVWHALLLPDQPPYHLK	26	0	2926.53	ENSMMUP00000001781	ENSMMUP00000001781	yes	yes	3,4	6.9924e-13	102.9	4	4	5	4	4	5	126320000	54847000	42877000	28600000
24421	296	TCQVLEALNVLVNRPNIR	18	1	2108.15	ENSMMUP00000001781	ENSMMUP00000001781	yes	yes	3	0.0025182	79.022			1			1	5574900	0	0	5574900
26007	296	VDLADLLTENPELFR	15	0	1743.9	ENSMMUP00000001781	ENSMMUP00000001781	yes	yes	2,3	4.3447e-67	234.22	5	4	7	5	4	7	91181000	13301000	43374000	34505000
2197	297	AVLLEALGSPSEDVR	15	0	1554.83	ENSMMUP00000001789	ENSMMUP00000001789	yes	yes	2	0.049743	49.188			1			1	2789300	0	0	2789300
3523	297	DLLDDILPLLYQETK	15	0	1787.96	ENSMMUP00000001789	ENSMMUP00000001789	yes	yes	2,3	6.6247e-22	183.41	2	4	4	2	4	4	17393000	4466000	9874800	3052200
7617	297	FLISDQPHPIDPLLK	15	0	1731.96	ENSMMUP00000001789	ENSMMUP00000001789	yes	yes	3	0.040354	51.875			1			1	1842800	0	0	1842800
10382	297	GWLEAMEEPTQTGSNLHMLR	20	0	2299.07	ENSMMUP00000001789	ENSMMUP00000001789	yes	yes	3	0.0020334	64.507			1			1	14310000	0	0	14310000
12299	297	ILDPEPYVGEMSVVTLAR	18	0	1988.03	ENSMMUP00000001789	ENSMMUP00000001789	yes	yes	2	3.1589e-06	113.33		1			1		2137600	0	2137600	0
17767	297	LVLVNPSFLLPR	12	0	1366.83	ENSMMUP00000001789	ENSMMUP00000001789	yes	yes	2	2.7355e-05	126.12		1	2		1	2	6670900	0	1947900	4723000
20728	297	PYAEDVWALLFR	12	0	1478.76	ENSMMUP00000001789	ENSMMUP00000001789	yes	yes	3	0.13589	40.154			1			1	589700	0	0	589700
21351	297	QVFHSLAR	8	0	956.519	ENSMMUP00000001789	ENSMMUP00000001789	yes	yes	2	0.033983	69.812	1			1			551280	551280	0	0
9011	298	GFVPDTPVGVAHFLLQR	17	0	1852	ENSMMUP00000001791;ENSMMUP00000001792	ENSMMUP00000001791	yes	no	2,3	0.0090917	59.673	2	1		2	1		6279100	5372800	906310	0
23522	298	SPAPSSDFADAITELEDAFSR	21	0	2225.01	ENSMMUP00000001791;ENSMMUP00000001792	ENSMMUP00000001791	yes	no	2,3	9.6227e-48	194.05	2	4	3	2	4	3	45918000	9038300	25575000	11304000
5486	299	EIPDLLEKGER	11	1	1297.69	ENSMMUP00000001803	ENSMMUP00000001803	no	no	2	0.036595	73.951	2	1	1				6124300	2926300	1996400	1201600
28326	299	WMALESILR	9	0	1117.6	ENSMMUP00000001803	ENSMMUP00000001803	yes	yes	2	0.0024637	102.61			1			1	596470	0	0	596470
25856	301	VAPDEHPILLTEAPLNPK	18	0	1953.06	ENSMMUP00000001807	ENSMMUP00000001807	yes	yes	2,3	6.5233e-05	96.247	13	12	11	13	12	11	22200000000	7643200000	9164000000	5393200000
24	302	AAAVLPVLDLAQR	13	0	1335.79	ENSMMUP00000001808;ENSMMUP00000029092;ENSMMUP00000041322	ENSMMUP00000001808	yes	no	2	2.0387e-05	124.12	1	1	1	1	1	1	75018000	18236000	34263000	22520000
3108	302	DIEEIIDELK	10	0	1215.62	ENSMMUP00000001808;ENSMMUP00000029092;ENSMMUP00000041322	ENSMMUP00000001808	yes	no	2	4.1153e-29	195.36	5	6	5	5	6	5	97335000	28533000	45032000	23769000
27934	302	VYEVATFYTMYNR	13	0	1655.77	ENSMMUP00000001808;ENSMMUP00000029092;ENSMMUP00000041322	ENSMMUP00000001808	yes	no	2	3.6191e-82	244.18	4	3	3	4	3	3	63877000	26880000	19019000	17978000
1872	303	ASILWLIGENCER	13	0	1559.78	ENSMMUP00000001814	ENSMMUP00000001814	yes	yes	2	4.2204e-06	132.79		1			1		3659400	0	3659400	0
2016	303	ATGYLELSNWPEVAPDPSVR	20	0	2200.08	ENSMMUP00000001814	ENSMMUP00000001814	yes	yes	2	0.00012146	80.382		1			1		1285900	0	1285900	0
3050	303	DHFQLGTLSHTLNIK	15	0	1722.91	ENSMMUP00000001814	ENSMMUP00000001814	yes	yes	2,3	3.1507e-10	161.04	1	1	1	1	1	1	11998000	3161300	4752100	4085000
4017	303	DRDHFQLGTLSHTLNIK	17	1	1994.03	ENSMMUP00000001814	ENSMMUP00000001814	yes	yes	3,4	0.00027368	106.6	1	2	2	1	2	2	58523000	8131200	22083000	28309000
9404	303	GLAAHYFFPR	10	0	1177.6	ENSMMUP00000001814	ENSMMUP00000001814	yes	yes	3	0.043283	60.019	1			1			646760	646760	0	0
16157	303	LLDSITVPVAR	11	0	1182.7	ENSMMUP00000001814	ENSMMUP00000001814	yes	yes	2	1.4276e-05	138.76	1	1	1	1	1	1	16257000	3827700	7901300	4528000
16445	303	LLQMQPVQHGEIIK	14	0	1632.9	ENSMMUP00000001814	ENSMMUP00000001814	yes	yes	3	0.00050549	94.191	1			1			5853800	5853800	0	0
16503	303	LLTQYILNLGK	11	0	1274.76	ENSMMUP00000001814	ENSMMUP00000001814	yes	yes	2	3.3308e-08	152.7	1	1	1	1	1	1	5110000	2119600	2264600	725840
27810	303	VVNIANVGAVPSGQDNINR	19	0	1936.01	ENSMMUP00000001814	ENSMMUP00000001814	yes	yes	2	1.7107e-11	149.57	1	1	1	1	1	1	19480000	6470600	13009000	0
2461	304	DAAWYQLLMAPLSEDQR	17	0	2005.96	ENSMMUP00000001816	ENSMMUP00000001816	yes	yes	2,3	2.0805e-16	173.03	2	5	1	2	5	1	24443000	6471700	13544000	4426900
2905	304	DGALHVIGSLAEILLK	16	0	1647.96	ENSMMUP00000001816	ENSMMUP00000001816	yes	yes	3	1.5561e-41	209.79		2			2		1444300	0	1444300	0
6830	304	EYFEFSEFFLK	11	0	1484.69	ENSMMUP00000001816	ENSMMUP00000001816	yes	yes	2	0.0052075	81.525	1	1	1	1	1	1	1579300	477970	970220	131110
18214	304	MDLNRIIQALK	11	1	1313.75	ENSMMUP00000001816	ENSMMUP00000001816	yes	yes	2	0.026998	78.342		1			1		7139900	0	7139900	0
18521	304	MKFDIFEDYASPTTAAQTLLYTAAK	25	1	2795.37	ENSMMUP00000001816	ENSMMUP00000001816	yes	yes	3	3.4703e-16	120.33	1	1	2	1	1	2	7421900	1463400	3125400	2833200
19830	304	NMVTQYWPDREPPPGEAIFPFNIHENDR	28	1	3368.57	ENSMMUP00000001816	ENSMMUP00000001816	yes	yes	4	0.0064169	50.498	2	1	2	2	1	2	53483000	20330000	14235000	18919000
54	305	AAEVPNEELINLLLK	15	0	1664.93	ENSMMUP00000001817;ENSMMUP00000033539;ENSMMUP00000001818	ENSMMUP00000001817	yes	no	3	0.053125	90.444			1			1	415780	0	0	415780
1668	305	APVIIIPQSSVSPNAVIADLGLIR	24	0	2442.42	ENSMMUP00000001817;ENSMMUP00000033539;ENSMMUP00000001818	ENSMMUP00000001817	yes	no	3	8.4888e-47	172.81	3	3	5	3	3	5	58725000	10648000	28238000	19839000
2234	305	AVSILGDEVFR	11	0	1204.65	ENSMMUP00000001817;ENSMMUP00000033539;ENSMMUP00000001818	ENSMMUP00000001817	yes	no	2	0.0026638	91.313	2	2	1	2	2	1	4869200	2792900	1797000	279350
3148	305	DIILFSFK	8	0	981.554	ENSMMUP00000001817;ENSMMUP00000033539	ENSMMUP00000001817	yes	no	2	0.0054978	101.64	1	2	2	1	2	2	1994100	0	1462700	531420
7942	305	FQHPSTMHILQPMDIHVELAK	21	0	2471.25	ENSMMUP00000001817;ENSMMUP00000033539;ENSMMUP00000001818	ENSMMUP00000001817	yes	no	4,5	0.0067379	55.688	2	1	1	2	1	1	22017000	13361000	4840500	3815200
8087	305	FSLVPMEHYSLPPVIDK	17	0	1971.02	ENSMMUP00000001817;ENSMMUP00000033539;ENSMMUP00000001818	ENSMMUP00000001817	yes	no	3	0.037164	48.351		1	1		1	1	15095000	0	5417400	9677600
9133	305	GGWFSGFWGK	10	0	1127.52	ENSMMUP00000001817;ENSMMUP00000033539;ENSMMUP00000001818	ENSMMUP00000001817	yes	no	2	0.0066505	82.749	1			1			77177	77177	0	0
9174	305	GHLDSMNVSLNQEDLNLLFR	20	0	2314.14	ENSMMUP00000001817;ENSMMUP00000033539;ENSMMUP00000001818	ENSMMUP00000001817	yes	no	3	3.0047e-11	136.26	1	1	2	1	1	2	45394000	11528000	14594000	19272000
9447	305	GLDLEQITSATLMK	14	0	1518.8	ENSMMUP00000001817;ENSMMUP00000033539;ENSMMUP00000001818	ENSMMUP00000001817	yes	no	2	0.0005657	92.265	1	1		1	1		5573200	1529600	4043600	0
9992	305	GRPLHELNVLQLGMEAR	17	1	1932.04	ENSMMUP00000001817;ENSMMUP00000033539;ENSMMUP00000001818	ENSMMUP00000001817	yes	no	3,4	0.0031779	81.317	2	1		2	1		6508500	4750500	1758000	0
10337	305	GVVGGVTGIITKPVEGAK	18	1	1680.98	ENSMMUP00000001817;ENSMMUP00000033539	ENSMMUP00000001817	yes	no	3	0.019133	63.894	1		1	1		1	5300900	2394100	0	2906900
11963	305	IGIARPEEEFHVPLDSYR	18	1	2127.07	ENSMMUP00000001817;ENSMMUP00000033539	ENSMMUP00000001817	yes	no	3,4	0.059234	55.546	1		1	1		1	16755000	7540300	0	9215100
12872	305	ISGEIMELVLMK	12	0	1361.73	ENSMMUP00000001817;ENSMMUP00000033539	ENSMMUP00000001817	yes	no	2	0.00083486	98.902	1			1			2046700	2046700	0	0
13827	305	KKDEESLIPESIDDLMTPEEK	21	2	2445.18	ENSMMUP00000001817;ENSMMUP00000033539;ENSMMUP00000001818	ENSMMUP00000001817	yes	no	3	2.007e-09	126.4			1			1	8400500	0	0	8400500
15126	305	LEHWYITGLR	10	0	1286.68	ENSMMUP00000001817;ENSMMUP00000033539;ENSMMUP00000001818	ENSMMUP00000001817	yes	no	2,3	0.0024875	92.538	4	2	1	4	2	1	11026000	5208900	1232900	4584500
15564	305	LGIWGGNVALDNLQIK	16	0	1709.95	ENSMMUP00000001817;ENSMMUP00000033539;ENSMMUP00000001818	ENSMMUP00000001817	yes	no	2	9.6606e-11	165.49	2			2			3671200	3671200	0	0
16051	305	LKPMQVALSEDDLTVLMK	18	1	2030.08	ENSMMUP00000001817;ENSMMUP00000033539;ENSMMUP00000001818	ENSMMUP00000001817	yes	no	3	3.1901e-05	110.56	1		3	1		3	10259000	3097300	0	7161400
18008	305	LYMNPYAESELK	12	0	1456.69	ENSMMUP00000001817;ENSMMUP00000033539;ENSMMUP00000001818	ENSMMUP00000001817	yes	no	2	2.886e-05	125.54	2	1	2	2	1	2	8342300	1900300	993930	5448100
19564	305	NLAAAWYVQIPGMEIK	16	0	1802.94	ENSMMUP00000001817;ENSMMUP00000033539;ENSMMUP00000001818	ENSMMUP00000001817	yes	no	2	3.4269e-07	151.9	1		2	1		2	7118600	2860100	0	4258500
20881	305	QESSFFTLTIVPHGYTEVANIPVAR	25	0	2775.42	ENSMMUP00000001817;ENSMMUP00000033539	ENSMMUP00000001817	yes	no	3	0.024573	42.618			1			1	4197300	0	0	4197300
22884	305	SIGATLTDVDDLIFK	15	0	1606.85	ENSMMUP00000001817;ENSMMUP00000033539	ENSMMUP00000001817	yes	no	2	7.2616e-05	109.1		1			1		4099800	0	4099800	0
23141	305	SLFGHTVGGAAGVVSR	16	0	1513.8	ENSMMUP00000001817;ENSMMUP00000033539	ENSMMUP00000001817	yes	no	3	3.605e-05	135.02	1			1			359670	359670	0	0
24955	305	TLDVFNIILAR	11	0	1273.74	ENSMMUP00000001817;ENSMMUP00000033539;ENSMMUP00000001818	ENSMMUP00000001817	yes	no	2	0.054954	80.102	1	2	2	1	2	2	7760800	1321400	3271600	3167800
25609	305	TVIQPGTYHPDIQLLHPINLEFLVNR	26	0	3026.63	ENSMMUP00000001817;ENSMMUP00000033539;ENSMMUP00000001818	ENSMMUP00000001817	yes	no	4	0.10594	30.592	1			1			2987400	2987400	0	0
26783	305	VLESVVADLLNR	12	0	1326.75	ENSMMUP00000001817;ENSMMUP00000033539;ENSMMUP00000001818	ENSMMUP00000001817	yes	no	2	0.068535	87.719	1	1		1	1		2356800	1340600	1016300	0
11566	306	ICLWCNEK	8	0	1121.5	ENSMMUP00000001827	ENSMMUP00000001827	yes	yes	2	0.096876	55.676	1		1	1		1	2796300	570460	0	2225800
26536	306	VHSFFIPDIEYLSDIK	16	0	1921.98	ENSMMUP00000001827	ENSMMUP00000001827	yes	yes	2,3	2.7704e-07	153.09	4	4	5	4	4	5	29956000	7567700	16543000	5845000
1333	307	ALPTDWLIYDEMTR	14	0	1722.83	ENSMMUP00000001834;ENSMMUP00000001835	ENSMMUP00000001834	yes	no	2	1.6875e-07	144.8			1			1	1931800	0	0	1931800
2992	307	DGQELEPQVGEQLLQLWER	19	0	2266.12	ENSMMUP00000001834;ENSMMUP00000001835	ENSMMUP00000001834	yes	no	3	2.2563e-10	139.08		2			2		3078600	0	3078600	0
6016	307	EMFLEDILR	9	0	1164.58	ENSMMUP00000001834;ENSMMUP00000001835	ENSMMUP00000001834	yes	no	2	0.00067408	129.1	2			2			1080000	1080000	0	0
8842	307	GFASQVEQLISMGANVHSK	19	0	2001.99	ENSMMUP00000001834;ENSMMUP00000001835	ENSMMUP00000001834	yes	no	3	0.10728	72.819			1			1	0	0	0	0
2080	308	ATYIQTIEEGINTHTHAAK	19	0	2097.05	ENSMMUP00000001839;ENSMMUP00000001836;ENSMMUP00000001841	ENSMMUP00000001839	yes	no	3,4	0.0013371	68.919		1	3		1	3	20902000	0	4987700	15914000
7557	308	FLDWTELK	8	0	1050.54	ENSMMUP00000001839;ENSMMUP00000001836;ENSMMUP00000001841	ENSMMUP00000001839	yes	no	2	0.0053247	99.802	3		3	3		3	9889800	6033200	0	3856500
11137	308	HQPAPVHYLSFQSEHSAFDR	20	0	2352.1	ENSMMUP00000001839;ENSMMUP00000001836	ENSMMUP00000001839	yes	no	3,4	3.1935e-05	94.569	1	1	2	1	1	2	9514400	3353400	967120	5193900
18857	308	MSSNSNFSEVTLAGLASK	18	0	1841.88	ENSMMUP00000001839;ENSMMUP00000001836;ENSMMUP00000001841	ENSMMUP00000001839	yes	no	2	0.017804	66.874	1	1		1	1		5776200	1604400	4171800	0
20768	308	QAHDLSPAAESSSTFSLSGR	20	0	2046.96	ENSMMUP00000001839;ENSMMUP00000001836;ENSMMUP00000001841	ENSMMUP00000001839	yes	no	3	0.086062	36.816	1			1			541650	541650	0	0
21691	308	RHQPAPVHYLSFQSEHSAFDR	21	1	2508.2	ENSMMUP00000001839;ENSMMUP00000001836	ENSMMUP00000001839	yes	no	5	0.11576	37.687	1			1			910000	910000	0	0
24897	308	TIYPLADLLAR	11	0	1244.71	ENSMMUP00000001839;ENSMMUP00000001841	ENSMMUP00000001839	yes	no	2	0.0025016	98.353	7	5	5	7	5	5	13881000	7516100	2203800	4161300
28922	308	YGLTLDPEADSEYLSR	16	0	1827.85	ENSMMUP00000001839;ENSMMUP00000001836;ENSMMUP00000001841	ENSMMUP00000001839	yes	no	2	1.3592e-05	142.45	1	1		1	1		8445200	2015600	6429500	0
29430	308	YQTQPVTLGEVEQVQSGK	18	0	1990	ENSMMUP00000001839;ENSMMUP00000001836;ENSMMUP00000001841	ENSMMUP00000001839	yes	no	2	0.00022394	87.24	1			1			4773600	4773600	0	0
4769	309	ECLQALEFLHSNQVIHR	17	0	2093.05	ENSMMUP00000001854;ENSMMUP00000001853;ENSMMUP00000024698	ENSMMUP00000001854	yes	no	4	0.034903	49.216		1	1		1	1	6501900	0	4369500	2132500
13496	309	KELIINEILVMR	12	1	1469.86	ENSMMUP00000001854;ENSMMUP00000001853;ENSMMUP00000024698	ENSMMUP00000001854	yes	no	2,3	1.8715e-06	137.84	2	2		2	2		7075500	5018400	2057100	0
14099	309	KNPQAVLDVLEFYNSK	16	1	1863.97	ENSMMUP00000001854;ENSMMUP00000001853;ENSMMUP00000024698	ENSMMUP00000001854	yes	no	2,3	2.2227e-07	155.57	2	3	2	2	3	2	35773000	8761000	14203000	12809000
3677	310	DLVHELVQR	9	0	1107.6	ENSMMUP00000001855	ENSMMUP00000001855	yes	yes	3	0.12463	48.794			1			1	1199700	0	0	1199700
25571	310	TVANMLIDDTSSEIFDELYK	20	0	2303.09	ENSMMUP00000001855	ENSMMUP00000001855	yes	yes	2,3	6.3168e-53	202.6	8	4	6	8	4	6	158590000	67574000	33086000	57934000
6984	311	FAYVAEREDELSLVK	15	1	1767.9	ENSMMUP00000001857;ENSMMUP00000036193	ENSMMUP00000001857	yes	no	3	0.03106	66.498	1			1			6038600	6038600	0	0
13234	311	IYDLNIPAFVK	11	0	1291.72	ENSMMUP00000001857;ENSMMUP00000036193	ENSMMUP00000001857	yes	no	2	0.00014058	125.72	4	4	1	4	4	1	26126000	13462000	11425000	1239400
21568	311	RFHTMDELVEHYK	13	1	1703.81	ENSMMUP00000001857;ENSMMUP00000036193	ENSMMUP00000001857	yes	no	4	0.00039563	109.72			1			1	156590	0	0	156590
2297	313	AWLLGLLR	8	0	940.586	ENSMMUP00000001860	ENSMMUP00000001860	yes	yes	2	0.00030513	143.37	9	4	4	9	4	4	24456000	6605700	13579000	4271900
10628	313	HEPAFDKWVIEEANWMTLDK	20	1	2458.16	ENSMMUP00000001860	ENSMMUP00000001860	yes	yes	3	0.010851	61.87	1			1			193050	193050	0	0
23175	313	SLGVAAEGLPDQYADGEAAR	20	0	1988.94	ENSMMUP00000001860	ENSMMUP00000001860	yes	yes	2	8.8518e-06	111.45		1	1		1	1	18405000	0	9230300	9174700
517	314	AESSSGGGTVPSSAGILEQGPSPGDGSPPKPK	32	1	2934.42	ENSMMUP00000001883	ENSMMUP00000001883	yes	yes	3	3.6981e-06	67.655			1			1	9701700	0	0	9701700
19863	314	NNSQIASGQNQAQAAAGSHQLSLGPPHSAAGPSPHTLR	38	0	3756.84	ENSMMUP00000001883	ENSMMUP00000001883	yes	yes	5	0.00084701	40.638	1	1		1	1		5093700	2163000	2930700	0
5524	315	EIVDPLYGIAEVEIPNIQK	19	0	2139.15	ENSMMUP00000001887	ENSMMUP00000001887	yes	yes	3	2.8803e-65	216.39	1	2	2	1	2	2	10789000	1904000	5857700	3026900
13976	315	KLPLTALAQNMQEASTQLEDSLLGK	25	1	2698.42	ENSMMUP00000001887	ENSMMUP00000001887	yes	yes	3	5.6017e-21	129.85	2	3	3	2	3	3	15688000	2341300	9248000	4098200
16885	315	LPLTALAQNMQEASTQLEDSLLGK	24	0	2570.33	ENSMMUP00000001887	ENSMMUP00000001887	yes	yes	3	1.3428e-39	165.46	2	2	1	2	2	1	29106000	7488300	15062000	6555400
17748	315	LVLDWDSVR	9	0	1101.58	ENSMMUP00000001887	ENSMMUP00000001887	yes	yes	2	0.0010254	119.75	4		2	4		2	10128000	9231100	0	896540
22602	316	SFPKDDPSKPVHLTAFLGYK	20	2	2246.17	ENSMMUP00000038007;ENSMMUP00000001889	ENSMMUP00000038007	yes	no	3,4	0.007412	76.526	2	1		2	1		15516000	11688000	3828100	0
22933	316	SINPLGGFVHYGEVTNDFVMLK	22	0	2436.21	ENSMMUP00000038007;ENSMMUP00000001889;ENSMMUP00000013110;ENSMMUP00000037003	ENSMMUP00000038007	yes	no	2,3	2.1177e-06	101.89	3	2	2	3	2	2	52805000	20674000	19005000	13126000
1590	318	APEPSLAGDGGPSAPAR	17	0	1548.75	ENSMMUP00000030483;ENSMMUP00000001914	ENSMMUP00000030483	yes	no	2	0.16921	31.089			1			1	80091	0	0	80091
2415	318	CNTISFATLAEIHHFHQIR	19	0	2294.14	ENSMMUP00000030483;ENSMMUP00000001914;ENSMMUP00000034730	ENSMMUP00000030483	yes	no	3,4,5	1.0836e-05	105.46	3		2	3		2	9389600	6139500	0	3250100
7903	318	FPVISVPHLPEK	12	0	1361.77	ENSMMUP00000030483;ENSMMUP00000001914	ENSMMUP00000030483	yes	no	2,3	7.6419e-07	141.08	3	2	4	3	2	4	36877000	17163000	11590000	8124500
9495	318	GLFPASYVQVIR	12	0	1348.75	ENSMMUP00000030483;ENSMMUP00000001914	ENSMMUP00000030483	yes	no	2	2.0228e-05	128.85	2	3	2	2	3	2	51911000	14594000	26426000	10891000
10654	318	HFDWLYAR	8	0	1106.53	ENSMMUP00000030483;ENSMMUP00000001914	ENSMMUP00000030483	yes	no	2	9.0518e-07	164.53	15	10	6	15	10	6	12524000	5081300	2531900	4911100
14036	318	KMDDSALQLNHTANEFAR	18	1	2059.97	ENSMMUP00000030483;ENSMMUP00000001914;ENSMMUP00000034730	ENSMMUP00000030483	yes	no	2,3,4	1.2544e-35	197.38	4	6	7	4	6	7	130360000	78339000	19152000	32873000
14578	318	LAEKFPVISVPHLPEK	16	1	1803.03	ENSMMUP00000030483;ENSMMUP00000001914	ENSMMUP00000030483	yes	no	3,4	0.008458	76.358	6	3	3	6	3	3	66557000	41113000	17401000	8043400
18187	318	MDDSALQLNHTANEFAR	17	0	1931.88	ENSMMUP00000030483;ENSMMUP00000001914;ENSMMUP00000034730	ENSMMUP00000030483	yes	no	3	0.021093	54.501			1			1	5378000	0	0	5378000
22679	318	SGGEAFVLGEASGFVK	16	0	1553.77	ENSMMUP00000030483;ENSMMUP00000001914	ENSMMUP00000030483	yes	no	2	1.0229e-30	192.4	2	1	1	2	1	1	25684000	10967000	8486700	6230000
23718	318	SQMQHFLQQQIIFFQK	16	0	2050.05	ENSMMUP00000030483;ENSMMUP00000001914;ENSMMUP00000034730	ENSMMUP00000030483	yes	no	2,3	3.4032e-22	182.35	4	3	3	4	3	3	57565000	26370000	14869000	16326000
3803	319	DNIQGITKPAIR	12	1	1324.75	ENSMMUP00000001926;ENSMMUP00000001935;ENSMMUP00000005840;ENSMMUP00000012596;ENSMMUP00000031247;ENSMMUP00000031248;ENSMMUP00000031273;ENSMMUP00000034283;ENSMMUP00000034308;ENSMMUP00000034312;ENSMMUP00000034321;ENSMMUP00000040172	ENSMMUP00000001926	yes	no	2,3	0.0004198	120.53	2	1		2	1		768050	523040	245010	0
14340	319	KTVTAMDVVYALK	13	1	1437.79	ENSMMUP00000001926;ENSMMUP00000001935;ENSMMUP00000005840;ENSMMUP00000012596;ENSMMUP00000031247;ENSMMUP00000031248;ENSMMUP00000031273;ENSMMUP00000034283;ENSMMUP00000034308;ENSMMUP00000034312;ENSMMUP00000034321;ENSMMUP00000040172	ENSMMUP00000001926	yes	no	2,3	5.498e-11	155.86	19	17	17	19	17	17	2209000000	1093000000	711420000	404560000
14341	319	KTVTAMDVVYALKR	14	2	1593.89	ENSMMUP00000001926;ENSMMUP00000001935;ENSMMUP00000005840;ENSMMUP00000012596;ENSMMUP00000031247;ENSMMUP00000031248;ENSMMUP00000031273;ENSMMUP00000034283;ENSMMUP00000034308;ENSMMUP00000034312;ENSMMUP00000034321;ENSMMUP00000040172	ENSMMUP00000001926	yes	no	2,3,4	4.581e-21	184.98	6	6	2	6	6	2	158320000	71296000	74385000	12634000
25655	319	TVTAMDVVYALK	12	0	1309.7	ENSMMUP00000001926;ENSMMUP00000001935;ENSMMUP00000005840;ENSMMUP00000012596;ENSMMUP00000031247;ENSMMUP00000031248;ENSMMUP00000031273;ENSMMUP00000034283;ENSMMUP00000034308;ENSMMUP00000034312;ENSMMUP00000034321;ENSMMUP00000040172	ENSMMUP00000001926	yes	no	2,3	8.3702e-84	241.03	34	24	22	34	24	22	3468700000	1284400000	1318100000	866270000
25656	319	TVTAMDVVYALKR	13	1	1465.8	ENSMMUP00000001926;ENSMMUP00000001935;ENSMMUP00000005840;ENSMMUP00000012596;ENSMMUP00000031247;ENSMMUP00000031248;ENSMMUP00000031273;ENSMMUP00000034283;ENSMMUP00000034308;ENSMMUP00000034312;ENSMMUP00000034321;ENSMMUP00000040172	ENSMMUP00000001926	yes	no	2,3	8.0047e-14	158.3	14	16	8	14	16	8	1590400000	935770000	560650000	93968000
26306	319	VFLENVIR	8	0	988.571	ENSMMUP00000001926;ENSMMUP00000001935;ENSMMUP00000005840;ENSMMUP00000012596;ENSMMUP00000031247;ENSMMUP00000031248;ENSMMUP00000031273;ENSMMUP00000034283;ENSMMUP00000034308;ENSMMUP00000034312;ENSMMUP00000034321;ENSMMUP00000040172	ENSMMUP00000001926	yes	no	2	1.332e-16	190.51	24	14	18	24	14	18	1118700000	499930000	483120000	135610000
26307	319	VFLENVIRDAVTYTEHAK	18	1	2104.1	ENSMMUP00000001926;ENSMMUP00000001935;ENSMMUP00000005840;ENSMMUP00000012596;ENSMMUP00000031247;ENSMMUP00000031248;ENSMMUP00000031273;ENSMMUP00000034283;ENSMMUP00000034308;ENSMMUP00000034312;ENSMMUP00000034321;ENSMMUP00000040172	ENSMMUP00000001926	yes	no	3,4	3.3976e-27	190.87	6	6	4	6	6	4	45008000	7504000	33856000	3648200
18315	320	MENGAVYSPTTEEDPGPAR	19	0	2019.88	ENSMMUP00000001929	ENSMMUP00000001929	yes	yes	3	0.13026	33.893			1			1	7798600	0	0	7798600
22693	320	SGIAAYFFLDR	11	0	1258.63	ENSMMUP00000001929	ENSMMUP00000001929	yes	yes	2	4.2186e-08	151.26	5	3	5	5	3	5	58684000	28484000	17484000	12715000
10953	321	HLQLAIRNDEELNKLLGR	18	2	2131.19	ENSMMUP00000001933;ENSMMUP00000029040;ENSMMUP00000031251;ENSMMUP00000031276	ENSMMUP00000001933	yes	no	3,4	0.00187	94.717	2	4	2	2	4	2	53134000	16462000	33651000	3021000
27643	321	VTIAQGGVLPNIQAVLLPK	19	0	1930.16	ENSMMUP00000001933;ENSMMUP00000029040;ENSMMUP00000031251;ENSMMUP00000031276	ENSMMUP00000001933	no	no	2,3	1.3365e-65	220.59	19	33	24				5406300000	1369900000	2494200000	1542200000
306	322	ADIANLADEFK	11	0	1205.59	ENSMMUP00000001942	ENSMMUP00000001942	yes	yes	2	1.8354e-05	136.38	2	1	1	2	1	1	20027000	12697000	4300800	3029300
1060	322	AKDINQEVYNFLATAGAK	18	1	1952	ENSMMUP00000001942	ENSMMUP00000001942	yes	yes	2,3	2.1892e-26	189.34	10	12	9	10	12	9	627240000	261190000	244630000	121420000
3066	322	DHLVPDPGCHYDQLIEVNLSELKPHINGPFTPDLAHPVAEVGK	43	1	4767.38	ENSMMUP00000001942	ENSMMUP00000001942	yes	yes	6	0.05182	31.821			1			1	15834000	0	0	15834000
3192	322	DINQEVYNFLATAGAK	16	0	1752.87	ENSMMUP00000001942	ENSMMUP00000001942	yes	yes	2,3	2.0095e-84	245.96	9	10	11	9	10	11	470170000	147560000	207800000	114810000
3401	322	DLEDLQILIK	10	0	1198.68	ENSMMUP00000001942	ENSMMUP00000001942	yes	yes	2	3.0397e-05	139.43	3	3	3	3	3	3	34726000	7446500	13902000	13377000
3448	322	DLGGIVLANACGPCIGQWDR	20	0	2171.03	ENSMMUP00000001942	ENSMMUP00000001942	yes	yes	2	6.4891e-14	150.69	1	1	1	1	1	1	5597900	1657100	2117700	1823200
5322	322	EGWPLDIR	8	0	984.503	ENSMMUP00000001942	ENSMMUP00000001942	yes	yes	2	0.0006637	128.69	6	6	8	6	6	8	119830000	62451000	38843000	18540000
7490	322	FKLEAPDADELPK	13	1	1471.76	ENSMMUP00000001942	ENSMMUP00000001942	yes	yes	2,3	1.4135e-13	161.48	5	7	5	5	7	5	84623000	38484000	23428000	22711000
7491	322	FKLEAPDADELPKGEFDPGQDTYQHPPK	28	2	3168.5	ENSMMUP00000001942	ENSMMUP00000001942	yes	yes	3,4	1.3138e-22	119.48	4	3	1	4	3	1	328310000	181190000	93008000	54117000
9173	322	GHLDNISNNLLIGAINIENGK	21	0	2218.17	ENSMMUP00000001942	ENSMMUP00000001942	yes	yes	2,3	2.3181e-38	189.11	4	6	7	4	6	7	289100000	81882000	113470000	93747000
11085	322	HPNGTQETILLNHTFNETQIEWFR	24	0	2924.42	ENSMMUP00000001942	ENSMMUP00000001942	yes	yes	2,3,4	2.4677e-16	130.37	5	4	8	5	4	8	412900000	225340000	106330000	81230000
12065	322	IHPVDKLTIQGLK	13	1	1460.87	ENSMMUP00000001942	ENSMMUP00000001942	yes	yes	4	0.0078471	84.507	1			1			2553700	2553700	0	0
13198	322	IVYGHLDDPAGQEIER	16	0	1810.88	ENSMMUP00000001942	ENSMMUP00000001942	yes	yes	2,3	2.6843e-15	169.3	11	6	8	11	6	8	519940000	323390000	111470000	85086000
14216	322	KQGLLPLTFADPADYNK	17	1	1889.99	ENSMMUP00000001942	ENSMMUP00000001942	yes	yes	2,3	3.2949e-32	194.94	7	8	7	7	8	7	164140000	55010000	71168000	37961000
15023	322	LEAPDADELPKGEFDPGQDTYQHPPK	26	1	2893.34	ENSMMUP00000001942	ENSMMUP00000001942	yes	yes	3	0.0080793	54.656			1			1	14458000	0	0	14458000
17113	322	LQLLEPFDK	9	0	1101.61	ENSMMUP00000001942	ENSMMUP00000001942	yes	yes	2	0.0059886	88.495			1			1	3832600	0	0	3832600
17114	322	LQLLEPFDKWDGK	13	1	1587.83	ENSMMUP00000001942	ENSMMUP00000001942	yes	yes	2,3	6.6204e-15	168.76	3	3	4	3	3	4	253290000	93344000	56827000	103120000
17115	322	LQLLEPFDKWDGKDLEDLQILIK	23	2	2768.5	ENSMMUP00000001942	ENSMMUP00000001942	yes	yes	3,4	4.5758e-06	95.622		3			3		18463000	0	18463000	0
17549	322	LTGSLSGWTSPK	12	0	1232.64	ENSMMUP00000001942	ENSMMUP00000001942	yes	yes	2	0.064831	50.354	1		1	1		1	48717000	12306000	0	36411000
19117	322	NAVTQEFGPVPDTAR	15	0	1600.78	ENSMMUP00000001942	ENSMMUP00000001942	yes	yes	2	2.1244e-52	213.83	2	2	2	2	2	2	61308000	10758000	23968000	26582000
19140	322	NDANPETHAFVTSPEIVTALAIAGTLK	27	0	2779.44	ENSMMUP00000001942	ENSMMUP00000001942	yes	yes	2,3,4	5.6799e-79	180.84	21	18	16	21	18	16	1213600000	418220000	456290000	339100000
20961	322	QGLLPLTFADPADYNK	16	0	1761.89	ENSMMUP00000001942	ENSMMUP00000001942	yes	yes	2	3.3191e-22	182.57	2	2	1	2	2	1	133430000	28985000	61098000	43350000
23679	322	SQFTITPGSEQIR	13	0	1462.74	ENSMMUP00000001942	ENSMMUP00000001942	yes	yes	2	8.8425e-09	146.79	1	2	2	1	2	2	47447000	7419600	19416000	20611000
25780	322	VAEKEGWPLDIR	12	1	1411.75	ENSMMUP00000001942	ENSMMUP00000001942	yes	yes	2,3	0.00038701	121.02	3	3	2	3	3	2	142960000	86842000	30381000	25736000
25843	322	VAMQDATAQMAMLQFISSGLPK	22	0	2337.15	ENSMMUP00000001942	ENSMMUP00000001942	yes	yes	2,3	3.7274e-47	190.91	5	6	15	5	6	15	948200000	120860000	61061000	766280000
25844	322	VAMSHFEPNEYIHYDLLEK	19	0	2334.1	ENSMMUP00000001942	ENSMMUP00000001942	yes	yes	2,3,4	9.38e-23	173.87	11	8	6	11	8	6	1170200000	557380000	323680000	289130000
25897	322	VAVPSTIHCDHLIEAQLGGEK	21	0	2273.15	ENSMMUP00000001942	ENSMMUP00000001942	yes	yes	2,3,4	6.4273e-06	109.65	7	4	8	7	4	8	397150000	110770000	139500000	146880000
26425	322	VGLIGSCTNSSYEDMGR	17	0	1844.8	ENSMMUP00000001942	ENSMMUP00000001942	yes	yes	2	5.047e-24	188.9	2	2	2	2	2	2	37985000	9738400	13436000	14811000
28046	322	WDGKDLEDLQILIK	14	1	1684.9	ENSMMUP00000001942	ENSMMUP00000001942	yes	yes	2,3	8.6076e-22	183.89	2	2	3	2	2	3	36094000	9747100	12544000	13803000
28529	322	WVVIGDENYGEGSSR	15	0	1666.76	ENSMMUP00000001942	ENSMMUP00000001942	yes	yes	2	2.0916e-52	213.99	7	5	6	7	5	6	410180000	111020000	183040000	116120000
5372	323	EHNGQVTGIDWAPESNR	17	0	1908.87	ENSMMUP00000001943	ENSMMUP00000001943	yes	yes	2,3	7.013e-05	106.38	3	1	3	3	1	3	26021000	23912000	484860	1624200
25690	323	TWKPTLVILR	10	1	1225.75	ENSMMUP00000001943	ENSMMUP00000001943	yes	yes	2,3	0.00026771	130.98	7	7	9	7	7	9	248810000	76752000	91285000	80770000
25902	323	VAWVSHDSTVCLADADKK	18	1	2000.96	ENSMMUP00000001943	ENSMMUP00000001943	yes	yes	2,3,4	1.3347e-05	110.35	6	2	3	6	2	3	20976000	18094000	1044500	1837000
26640	323	VISICYFEQENDWWVCK	17	0	2275.01	ENSMMUP00000001943	ENSMMUP00000001943	yes	yes	2	3.1527e-16	169.37	1	1	2	1	1	2	16794000	6403700	4925400	5465200
10245	324	GVEGLIDIENPNR	13	0	1424.73	ENSMMUP00000001944	ENSMMUP00000001944	yes	yes	2	6.7313e-05	117.92		1	1		1	1	7547300	0	7547300	0
13699	324	KGVEGLIDIENPNR	14	1	1552.82	ENSMMUP00000001944	ENSMMUP00000001944	yes	yes	2,3	3.677e-05	124.16	6	3	3	6	3	3	66841000	36424000	12299000	18118000
21424	324	QYTSPEEIDAQLQAEK	16	0	1848.87	ENSMMUP00000001944	ENSMMUP00000001944	yes	yes	2	1.6641e-22	186.85	2	2	2	2	2	2	60434000	16634000	30482000	13318000
1286	326	ALLLQGSNEIEIR	13	0	1454.81	ENSMMUP00000001955	ENSMMUP00000001955	yes	yes	2	9.6603e-06	128.22	1	1		1	1		10072000	5935600	4136600	0
2916	326	DGEAGAQGPPGPAGPAGER	19	0	1689.77	ENSMMUP00000001955	ENSMMUP00000001955	yes	yes	2	0.00032446	78.78	1	1		1	1		216640	114620	102020	0
8226	326	FTYSVTVDGCTSHTGAWGK	19	0	2072.93	ENSMMUP00000001955	ENSMMUP00000001955	yes	yes	3	0.0043319	60.489	2			2			8671600	8671600	0	0
8992	326	GFSGLQGPPGPPGSPGEQGPSGASGPAGPR	30	0	2656.26	ENSMMUP00000001955	ENSMMUP00000001955	yes	yes	3	0.01613	54.675			1			1	4641000	0	0	4641000
9632	326	GLTGPIGPPGPAGAPGDKGETGPSGPAGPTGAR	33	1	2850.43	ENSMMUP00000001955	ENSMMUP00000001955	yes	yes	3	1.6456e-19	98.929	1	2	2	1	2	2	120360000	14269000	53640000	52453000
10084	326	GSPGADGPAGAPGTPGPQGIAGQR	24	0	2072	ENSMMUP00000001955	ENSMMUP00000001955	yes	yes	2,3	4.4007e-16	125.92	1	1		1	1		1550100	331140	1219000	0
22666	326	SGEYWIDPNQGCNLDAIK	18	0	2078.94	ENSMMUP00000001955	ENSMMUP00000001955	yes	yes	2	3.4918e-13	160.64		1	1		1	1	8447000	0	4692300	3754700
23972	326	STGGISVPGPMGPSGPR	17	0	1552.77	ENSMMUP00000001955	ENSMMUP00000001955	yes	yes	2,3	0.00035131	90.348	14	7	9	14	7	9	3028900000	542090000	1044100000	1442700000
11986	327	IGNNFMDGLK	10	0	1107.54	ENSMMUP00000001959	ENSMMUP00000001959	yes	yes	2	0.011602	64.73		1			1		207660	0	207660	0
15675	327	LGTDQPLDQATISLQMGTNK	20	0	2130.06	ENSMMUP00000001959	ENSMMUP00000001959	yes	yes	2	7.0798e-42	197.67	1	1	1	1	1	1	109980000	20449000	53687000	35841000
9180	329	GHLHLLETSIDGILADVK	18	0	1930.05	ENSMMUP00000001968	ENSMMUP00000001968	yes	yes	2,3,4	2.4351e-09	150.37	2	3	3	2	3	3	9190800	1682100	5902500	1606100
16648	329	LNEHPSSNWSPQLSYFEYR	19	0	2353.08	ENSMMUP00000001968	ENSMMUP00000001968	yes	yes	3	1.5233e-05	99.044	1	1		1	1		20565000	9627400	10937000	0
6345	331	EQTVSVSGAFQINTFDLR	18	0	2011	ENSMMUP00000040841;ENSMMUP00000001976;ENSMMUP00000001978	ENSMMUP00000040841	yes	no	2	0.0015808	71.263			1			1	2330300	0	0	2330300
9276	331	GIITVDELLAIK	12	0	1283.77	ENSMMUP00000040841;ENSMMUP00000001976;ENSMMUP00000001978	ENSMMUP00000040841	yes	no	2	4.8434e-45	205.46	7	8	8	7	8	8	124600000	29675000	46460000	48461000
12660	331	IPLNDLFR	8	0	986.555	ENSMMUP00000040841;ENSMMUP00000001976;ENSMMUP00000001978	ENSMMUP00000040841	yes	no	2	0.0069873	106.42	8	4	7	8	4	7	147100000	76876000	54721000	15504000
29096	331	YLDFVFAVK	9	0	1100.59	ENSMMUP00000040841;ENSMMUP00000001976;ENSMMUP00000001978	ENSMMUP00000040841	yes	no	2	0.0013118	113.71	3	4	2	3	4	2	58664000	24428000	14736000	19500000
5083	332	EFGTNWPVYMTKPDGTYVVMTVQELLPSSFGPEDLQK	37	1	4203.02	ENSMMUP00000001992	ENSMMUP00000001992	yes	yes	3,4	0.0035923	40.513		1	2		1	2	6680700	0	3153000	3527700
14261	332	KSAYCPYSHFPVGAALLTQEGR	22	1	2451.2	ENSMMUP00000001992;ENSMMUP00000001991	ENSMMUP00000001992	yes	no	3	9.9149e-07	110.56	2	1	1	2	1	1	58434000	18053000	22610000	17772000
22284	332	SAYCPYSHFPVGAALLTQEGR	21	0	2323.11	ENSMMUP00000001992;ENSMMUP00000001991	ENSMMUP00000001992	yes	no	2,3	1.6395e-23	165.17	10	6	9	10	6	9	431160000	184370000	123270000	123510000
327	333	ADLEMQIESLTEELAYLK	18	0	2095.04	ENSMMUP00000001995;ENSMMUP00000001994	ENSMMUP00000001995	yes	no	3	0.0002131	96.208	1			1			769360	769360	0	0
328	333	ADLEMQIESLTEELAYLKK	19	1	2223.13	ENSMMUP00000001995;ENSMMUP00000001994	ENSMMUP00000001995	yes	no	3	0.00017816	84.874	3	5	2	3	5	2	22148000	4575100	12075000	5496900
3409	334	DLEIEVEGLR	10	0	1171.61	ENSMMUP00000002002;ENSMMUP00000002001	ENSMMUP00000002002	yes	no	2	0.00019334	119.53	3	2	3	3	2	3	10271000	2468400	3565000	4237700
21820	334	RLLEGESEGTMEESK	15	1	1693.78	ENSMMUP00000002002;ENSMMUP00000002005	ENSMMUP00000002002	yes	no	2	0.069315	61.167	1	1		1	1		89192000	23047000	66145000	0
4159	335	DSVPMGSPAFLLSLFDGGTR	20	0	2066.01	ENSMMUP00000002007	ENSMMUP00000002007	yes	yes	2	3.8155e-11	142.88		2	1		2	1	2107600	0	1572500	535100
14200	335	KQDASEKDSVPMGSPAFLLSLFDGGTR	27	2	2852.4	ENSMMUP00000002007	ENSMMUP00000002007	yes	yes	3,4	7.0604e-11	99.387	2	2	2	2	2	2	9404300	3605800	2468600	3329900
16491	335	LLSTGPTEPWSIR	13	0	1455.77	ENSMMUP00000002007;ENSMMUP00000002006	ENSMMUP00000002007	yes	no	2	0.0069499	71.241	1			1			1271100	1271100	0	0
28607	335	YANVFLQPVTDDIAPGYHSIVQRPMDLSTIK	31	1	3487.78	ENSMMUP00000002007;ENSMMUP00000002006;ENSMMUP00000034091;ENSMMUP00000034090	ENSMMUP00000002007	yes	no	4	0.0011638	50.986			1			1	7173300	0	0	7173300
4428	336	DWLFAPHYR	9	0	1203.58	ENSMMUP00000002009;ENSMMUP00000039564;ENSMMUP00000039563	ENSMMUP00000002009	yes	no	2,3	3.5169e-12	172.21	6	4	4	6	4	4	43808000	11168000	15672000	16967000
7636	336	FLLSLPEHR	9	0	1110.62	ENSMMUP00000002009	ENSMMUP00000002009	yes	yes	2,3	0.0038919	93.178	4	4	4	4	4	4	76336000	44514000	12270000	19552000
8466	336	GAEILEVLHSLPAVR	15	0	1602.91	ENSMMUP00000002009;ENSMMUP00000039564;ENSMMUP00000039563	ENSMMUP00000002009	yes	no	3	3.7183e-05	125.82	5	2	4	5	2	4	68610000	22817000	16439000	29354000
8581	336	GDAAVRDELMAAVR	14	1	1472.74	ENSMMUP00000002009	ENSMMUP00000002009	yes	yes	2,3	1.6691e-06	140.91	2	2	3	2	2	3	25273000	4710100	8530900	12032000
11979	336	IGLFYMDNDLITR	13	0	1569.79	ENSMMUP00000002009;ENSMMUP00000039564;ENSMMUP00000039563	ENSMMUP00000002009	yes	no	2	3.1585e-05	122.64	4	5	5	4	5	5	65748000	18630000	25712000	21407000
20556	336	PLENLEEEGLPKNPDLR	17	1	1962.01	ENSMMUP00000002009	ENSMMUP00000002009	yes	yes	3	0.00010637	131.86	3	3	2	3	3	2	102110000	42457000	45037000	14614000
23096	336	SLDWQIDVDLLNK	13	0	1557.8	ENSMMUP00000002009;ENSMMUP00000039564;ENSMMUP00000039563	ENSMMUP00000002009	yes	no	2	6.8143e-06	130.61		1	2		1	2	5715900	0	1366700	4349200
29531	336	YSVFFQSLAVVEQEMK	16	0	1903.94	ENSMMUP00000002009;ENSMMUP00000039564;ENSMMUP00000039563	ENSMMUP00000002009	yes	no	2,3	1.5324e-15	178.23		3	2		3	2	2826700	0	2439500	387230
1370	337	ALSIFNELR	9	0	1061.59	ENSMMUP00000002014	ENSMMUP00000002014	yes	yes	2	0.11863	49.715			1			1	830810	0	0	830810
2313	337	AWYGLGQTYEILK	13	0	1540.79	ENSMMUP00000002014	ENSMMUP00000002014	yes	yes	2	1.6448e-14	165.58		1	1		1	1	9844500	0	3508200	6336300
7686	337	FLSLPDTWMK	10	0	1236.62	ENSMMUP00000002014	ENSMMUP00000002014	yes	yes	2	0.016788	71.349		1			1		1189600	0	1189600	0
11749	337	IENMDTFSNLLYVR	14	0	1713.84	ENSMMUP00000002014	ENSMMUP00000002014	yes	yes	2	0.00022047	103.6	1			1			2161300	2161300	0	0
18725	337	MPFYCLYYYR	10	0	1474.64	ENSMMUP00000002014	ENSMMUP00000002014	yes	yes	2	0.010325	90.629		1			1		84794	0	84794	0
22462	337	SELSYLAHNLCEIDKYR	17	1	2110.02	ENSMMUP00000002014	ENSMMUP00000002014	yes	yes	3	0.00040218	102.29		1			1		3506500	0	3506500	0
29123	337	YLGAWTLMGHEYMEMK	16	0	1958.87	ENSMMUP00000002014	ENSMMUP00000002014	yes	yes	3	0.023879	66.989		2	1		2	1	758660	0	624120	134540
6141	338	ENPHATSNSIFINWK	15	0	1756.85	ENSMMUP00000002036	ENSMMUP00000002036	yes	yes	2,3	3.5218e-05	128.95	2	1	3	2	1	3	40053000	21445000	3860900	14748000
14547	338	LAAVQLLQFLAPK	13	0	1410.86	ENSMMUP00000002036	ENSMMUP00000002036	yes	yes	2	1.5007e-07	142.1	2	1	1	2	1	1	12112000	4846000	4426300	2840100
19903	338	NPELSTQLIDIIHTAAAR	18	0	1962.05	ENSMMUP00000002036	ENSMMUP00000002036	yes	yes	3	3.4686e-09	147.09	1	5	6	1	5	6	67661000	7630500	27418000	32612000
2076	339	ATTVDVFLPGSNEVWYDYK	19	0	2203.05	ENSMMUP00000002040	ENSMMUP00000002040	yes	yes	2	4.2547e-23	170.89	4	3	4	4	3	4	47665000	13886000	16993000	16786000
2104	339	AVDAGFDEHDIPYDAMWLDIEHTEGK	26	0	2973.31	ENSMMUP00000002040	ENSMMUP00000002040	yes	yes	3,4	4.3359e-11	96.881	2	1	1	2	1	1	36428000	25711000	3517500	7199600
2105	339	AVDAGFDEHDIPYDAMWLDIEHTEGKR	27	1	3129.41	ENSMMUP00000002040	ENSMMUP00000002040	yes	yes	3,5	2.5893e-27	127.35	3	3	1	3	3	1	72248000	26771000	42898000	2579200
5780	339	ELHNIYGFYHQMATAEGLIQR	21	0	2490.21	ENSMMUP00000002040	ENSMMUP00000002040	yes	yes	2,3,4	3.079e-168	276.26	6	7	7	6	7	7	89996000	17381000	44787000	27829000
10099	339	GSSVGELYLDDGHSFQYLHQK	21	0	2379.11	ENSMMUP00000002040	ENSMMUP00000002040	yes	yes	2,3	4.0278e-08	123.55	3		1	3		1	35341000	25721000	0	9619100
11637	339	IDPDYSVYVKAK	12	1	1396.72	ENSMMUP00000002040	ENSMMUP00000002040	yes	yes	2	0.11963	58.132			1			1	12106000	0	0	12106000
12691	339	IPVALDTIPVFQR	13	0	1467.84	ENSMMUP00000002040	ENSMMUP00000002040	yes	yes	2	0.00012427	113.24	2	2	2	2	2	2	36905000	8466300	17748000	10691000
15939	339	LISCSGDTGNLILADGK	17	0	1732.87	ENSMMUP00000002040;ENSMMUP00000033783	ENSMMUP00000002040	yes	no	2	4.4923e-05	110.74	1			1			2614900	2614900	0	0
18011	339	LYNLDVYGYQIYDK	14	0	1765.86	ENSMMUP00000002040;ENSMMUP00000033783	ENSMMUP00000002040	yes	no	2	1.6363e-22	185.67	3	4	3	3	4	3	68591000	17565000	30838000	20188000
20596	339	PLWVEFPDELK	11	0	1371.71	ENSMMUP00000002040	ENSMMUP00000002040	yes	yes	2	0.00058855	108.9	1	2	2	1	2	2	32669000	6267100	18468000	7933800
23979	339	STGWMTESSYGLR	13	0	1473.66	ENSMMUP00000002040	ENSMMUP00000002040	yes	yes	2	9.778e-05	113.99		1			1		4909600	0	4909600	0
24608	339	TFDMEDEYMLGSALLVHPVTEPK	23	0	2621.24	ENSMMUP00000002040	ENSMMUP00000002040	yes	yes	3	2.1308e-07	92.563	1		1	1		1	13257000	7950000	0	5307300
28856	339	YGAVWTGDNTAEWSYLK	17	0	1959.9	ENSMMUP00000002040	ENSMMUP00000002040	yes	yes	2	1.5413e-16	174.87	5	3	4	5	3	4	69457000	24358000	17719000	27381000
2301	340	AWNEFLVAAGLSR	13	0	1432.75	ENSMMUP00000037045;ENSMMUP00000002045	ENSMMUP00000037045	yes	no	2	1.0501e-53	220.85	2	2	1	2	2	1	42769000	15854000	14206000	12709000
5160	340	EFVGGNTPNFLTLVDSYSTFTQR	23	0	2592.25	ENSMMUP00000037045;ENSMMUP00000002045	ENSMMUP00000037045	yes	no	2,3	2.2987e-58	201.61	6	6	6	6	6	6	154650000	35154000	70302000	49195000
6124	340	ENLLQLLTDGR	11	0	1270.69	ENSMMUP00000037045;ENSMMUP00000002045	ENSMMUP00000037045	yes	no	2	3.4811e-211	304.57	4	4	4	4	4	4	95233000	36194000	32060000	26979000
3274	342	DKEEEHQSGFFSALTNMVGSMFIADAHEK	29	1	3254.46	ENSMMUP00000002055	ENSMMUP00000002055	yes	yes	4	0.013798	46.106	1			1			1813300	1813300	0	0
8345	342	FWEELFLMK	9	0	1241.62	ENSMMUP00000002055	ENSMMUP00000002055	yes	yes	2	0.026874	68.735		1			1		77954	0	77954	0
18462	342	MHQSFDNLYSMVLR	14	0	1739.81	ENSMMUP00000002055	ENSMMUP00000002055	yes	yes	3	3.9433e-05	118.37	1	1	1	1	1	1	4798900	2726900	1046900	1025100
2564	343	DATTSTALPLWDLQPQFHPR	20	0	2293.15	ENSMMUP00000002060	ENSMMUP00000002060	yes	yes	3	0.00010512	80.738	1	1	2	1	1	2	36672000	8143800	9767300	18761000
7913	343	FQAPTGEEKESWIK	14	1	1648.81	ENSMMUP00000002060	ENSMMUP00000002060	yes	yes	3	0.0065015	80.522	3			3			7804600	7804600	0	0
14900	343	LDLDVPDSGPQVFAPSNDVSEAQPR	25	0	2652.27	ENSMMUP00000002060	ENSMMUP00000002060	yes	yes	2	0.00056415	63.122			1			1	10644000	0	0	10644000
23839	343	SSGGLLGFWK	10	0	1050.55	ENSMMUP00000002060	ENSMMUP00000002060	yes	yes	2	1.0103e-20	182.39	2	2	3	2	2	3	58045000	28228000	16637000	13180000
26823	343	VLGSEPVPVSAETLLSQAVEQLR	23	0	2421.31	ENSMMUP00000002060	ENSMMUP00000002060	yes	yes	2,3	3.8943e-57	192.62	6	7	7	6	7	7	214830000	36541000	99709000	78580000
3278	345	DKELYTQNGILHMLDR	16	1	1944.97	ENSMMUP00000002071;ENSMMUP00000002073	ENSMMUP00000002071	yes	no	3,4	0.00020566	113.4	1	1	1	1	1	1	10063000	2119500	5220200	2723600
25563	345	TTYDQMYNDLLR	12	0	1531.7	ENSMMUP00000002071;ENSMMUP00000002073	ENSMMUP00000002071	yes	no	2	0.0030115	83.204		1			1		2458600	0	2458600	0
4794	346	EDELWASFLNDVGPK	15	0	1718.82	ENSMMUP00000002085	ENSMMUP00000002085	yes	yes	2,3	6.6868e-82	242.07	5	4	4	5	4	4	114710000	35426000	35574000	43711000
5616	346	EKPPANVPSALPSLPAGSGLK	21	1	2029.12	ENSMMUP00000002085	ENSMMUP00000002085	yes	yes	2	0.0051064	65.887		1			1		4196500	0	4196500	0
13459	346	KEDELWASFLNDVGPK	16	1	1846.91	ENSMMUP00000002085	ENSMMUP00000002085	yes	yes	3	0.00040993	97.45			1			1	1156200	0	0	1156200
13829	346	KKEDELWASFLNDVGPK	17	2	1975.01	ENSMMUP00000002085	ENSMMUP00000002085	yes	yes	2,3,4	4.0379e-15	174.59	5	5	3	5	5	3	68244000	20420000	34424000	13399000
15003	346	LDWESFKEEEGIGEELAIHNR	21	1	2500.19	ENSMMUP00000002085	ENSMMUP00000002085	yes	yes	3,4	4.1743e-05	106.75	3	1	1	3	1	1	48524000	31553000	8034900	8936000
23014	346	SKLDWESFKEEEGIGEELAIHNR	23	2	2715.31	ENSMMUP00000002085	ENSMMUP00000002085	yes	yes	3,4,5	7.5034e-46	187.57	3	3	2	3	3	2	60543000	20082000	17773000	22687000
26243	346	VFDFAGEEVR	10	0	1167.56	ENSMMUP00000002085	ENSMMUP00000002085	yes	yes	2	0.0016833	97.456	1	1	2	1	1	2	7168500	1895700	833770	4439000
29	347	AADAPFVINAIIR	13	0	1369.77	ENSMMUP00000002088	ENSMMUP00000002088	yes	yes	2	0.0046813	76.073	1	1		1	1		3058500	2256900	801620	0
1432	347	ALYDLFSHPVER	12	0	1445.73	ENSMMUP00000002088	ENSMMUP00000002088	yes	yes	2,3	6.369e-07	142.08	2	2	2	2	2	2	32819000	13523000	11573000	7722600
5619	349	EKPSYDTETDPSEGLMNVLK	20	1	2252.05	ENSMMUP00000002100	ENSMMUP00000002100	yes	yes	3	7.5571e-10	132.64	2	2	1	2	2	1	41022000	17093000	14917000	9011100
5620	349	EKPSYDTETDPSEGLMNVLKK	21	2	2380.15	ENSMMUP00000002100	ENSMMUP00000002100	yes	yes	3	0.03241	65.808	1			1			12383000	12383000	0	0
12947	349	ISNYGWDQSDKFVK	14	1	1685.8	ENSMMUP00000002100	ENSMMUP00000002100	yes	yes	2,3	0.00017383	116.84	2	4	1	2	4	1	52422000	16990000	32953000	2479400
13327	349	KAELLDNEKPAAVVAPITTGYTVK	24	2	2527.39	ENSMMUP00000002100	ENSMMUP00000002100	yes	yes	3,4	3.4855e-15	132.83	4	5	5	4	5	5	266620000	80549000	114310000	71758000
28081	349	WDYLTQVEK	9	0	1180.58	ENSMMUP00000002100	ENSMMUP00000002100	yes	yes	2	0.0077173	85.355	2	3	1	2	3	1	57780000	27878000	24473000	5429600
4341	351	DVNIVQFYTPFGEHLGTLK	19	0	2177.12	ENSMMUP00000036731;ENSMMUP00000002105	ENSMMUP00000036731	yes	no	3	0.00013144	83.418			1			1	3355900	0	0	3355900
8459	351	GAEAYHFFILAQR	13	0	1521.77	ENSMMUP00000036731;ENSMMUP00000002105;ENSMMUP00000036729	ENSMMUP00000036731	yes	no	3	6.4569e-05	118.28	1			1			896650	896650	0	0
16402	351	LLPEIAQMFVR	11	0	1315.73	ENSMMUP00000036731;ENSMMUP00000002105	ENSMMUP00000036731	yes	no	2	0.0049757	82.417	1		1	1		1	1595600	771120	0	824490
23814	351	SSEATSALAGLLEEEVLSTTDR	22	0	2278.12	ENSMMUP00000036731;ENSMMUP00000002105;ENSMMUP00000036729	ENSMMUP00000036731	yes	no	3	6.6159e-06	82.586	1			1			1126700	1126700	0	0
29003	351	YIDIVPLFVAMTK	13	0	1508.83	ENSMMUP00000036731;ENSMMUP00000002105	ENSMMUP00000036731	yes	no	2,3	0.0013345	105.17		1	1		1	1	1202900	0	213990	988930
3942	353	DPVYTFSISQNPFPIENR	18	0	2123.03	ENSMMUP00000033915;ENSMMUP00000002117	ENSMMUP00000033915	yes	no	2,3	1.662e-74	231.37	1	3	3	1	3	3	29962000	3998400	14735000	11228000
4271	353	DVDKFGNEITQLAR	14	1	1604.82	ENSMMUP00000033915;ENSMMUP00000002117	ENSMMUP00000033915	yes	no	3	5.9527e-08	150.69	2			2			9495200	9495200	0	0
6487	353	ESSSEQYVPDVFYK	14	0	1676.76	ENSMMUP00000033915;ENSMMUP00000002117	ENSMMUP00000033915	yes	no	2	6.9717e-07	136.6	3	3	3	3	3	3	66302000	27276000	25782000	13244000
1738	354	AQKDEEKMEIQEIQLK	16	2	1959	ENSMMUP00000002121;ENSMMUP00000001059;ENSMMUP00000002122;ENSMMUP00000002123;ENSMMUP00000002125;ENSMMUP00000033526;ENSMMUP00000002124	ENSMMUP00000002121	yes	no	4	0.07478	72.321	1			1			151930	151930	0	0
4045	354	DRVLEELHKAEDSLLAAEEAAAK	23	2	2507.29	ENSMMUP00000002121;ENSMMUP00000001059;ENSMMUP00000002122	ENSMMUP00000002121	yes	no	4	4.3714e-06	96.487	1	3		1	3		10595000	1703700	8891300	0
4993	354	EENLSMHQMLDQTLLELNNM	20	0	2402.09	ENSMMUP00000002121;ENSMMUP00000001059;ENSMMUP00000002122;ENSMMUP00000002123	ENSMMUP00000002121	yes	no	2,3	6.0322e-54	212.95	17	25	15	17	25	15	1028700000	332300000	320180000	376220000
14014	354	KLVIIESDLER	11	1	1313.76	ENSMMUP00000002121;ENSMMUP00000001059;ENSMMUP00000002122;ENSMMUP00000002123;ENSMMUP00000002125;ENSMMUP00000033526;ENSMMUP00000002124	ENSMMUP00000002121	yes	no	2,3	1.6385e-05	141.08	3	2	2	3	2	2	10694000	89473	4783100	5821700
14015	354	KLVIIESDLERAEER	15	2	1798.98	ENSMMUP00000002121;ENSMMUP00000001059;ENSMMUP00000002122;ENSMMUP00000002123;ENSMMUP00000002125;ENSMMUP00000033526;ENSMMUP00000002124	ENSMMUP00000002121	yes	no	2,3	0.0058299	95.854	2	2		2	2		26028000	17329000	8699700	0
17734	354	LVIIESDLER	10	0	1185.66	ENSMMUP00000002121;ENSMMUP00000001059;ENSMMUP00000002122;ENSMMUP00000002123;ENSMMUP00000002125;ENSMMUP00000033526;ENSMMUP00000002124	ENSMMUP00000002121	yes	no	2	6.7353e-05	130.98	1	1	1	1	1	1	11061000	3566600	5838700	1655500
25807	354	VAHAKEENLSMHQMLDQTLLELNNM	25	1	2908.39	ENSMMUP00000002121;ENSMMUP00000001059;ENSMMUP00000002122;ENSMMUP00000002123	ENSMMUP00000002121	yes	no	4	0.015405	58.712		1			1		2773000	0	2773000	0
26768	354	VLEELHKAEDSLLAAEEAAAK	21	1	2236.16	ENSMMUP00000002121;ENSMMUP00000001059;ENSMMUP00000002122	ENSMMUP00000002121	yes	no	2,3,4	1.1679e-47	199.7	3	5	2	3	5	2	99189000	44193000	36893000	18103000
7771	356	FNEQIEPIYALLR	13	0	1604.86	ENSMMUP00000002131	ENSMMUP00000002131	yes	yes	2	3.9183e-32	191.53	3	3	2	3	3	2	49508000	17806000	17306000	14396000
11783	356	IETDERDSTNR	11	1	1334.61	ENSMMUP00000002131;ENSMMUP00000039929	ENSMMUP00000002131	yes	no	2	0.10133	61.815		1			1		1500900	0	1500900	0
8358	357	FWRPEEPIDVIRPDIAALVR	20	2	2391.31	ENSMMUP00000002145	ENSMMUP00000002145	yes	yes	3,4	9.313e-06	119.45	4	4	3	4	4	3	27273000	7786900	16297000	3189200
12572	357	INSFYAFEVK	10	0	1216.61	ENSMMUP00000002145	ENSMMUP00000002145	yes	yes	2	0.098227	47.844		1			1		1443300	0	1443300	0
12581	358	INWAMEDKQEMVDIIETVYR	20	1	2482.19	ENSMMUP00000002155	ENSMMUP00000002155	yes	yes	3	8.42e-11	139.46	1	1	1	1	1	1	1633100	1066300	481630	85204
24276	358	SYMLPHLHNGWQVDQAILSEEDR	23	0	2737.29	ENSMMUP00000002155;ENSMMUP00000002154	ENSMMUP00000002155	yes	no	3	2.5634e-31	158.89	2	2	1	2	2	1	117480000	27766000	44437000	45273000
3685	359	DLVPDLSNFYAQYK	14	0	1671.81	ENSMMUP00000002161;ENSMMUP00000012414;ENSMMUP00000012413	ENSMMUP00000002161	yes	no	2,3	1.4728e-12	168.61	6	6	5	6	6	5	333980000	100030000	158470000	75482000
12245	359	IKNEIDSTLTFR	12	1	1435.77	ENSMMUP00000002161;ENSMMUP00000012414;ENSMMUP00000012413	ENSMMUP00000002161	yes	no	2,3	0.00039695	124.12	5	6	3	5	6	3	36926000	28243000	7047800	1635600
13275	359	IYPLPHMYVIK	11	0	1372.76	ENSMMUP00000002161;ENSMMUP00000012414;ENSMMUP00000012413	ENSMMUP00000002161	yes	no	2,3	0.00019843	122.28	4	4	2	4	4	2	109350000	41706000	38470000	29179000
17033	359	LQDPFSLYR	9	0	1137.58	ENSMMUP00000002161	ENSMMUP00000002161	yes	yes	2	4.5282e-12	169.93	6	6	6	6	6	6	303770000	149330000	120110000	34332000
28068	359	WDPDKAGDKPHMQTYEIDLNK	21	2	2500.17	ENSMMUP00000002161	ENSMMUP00000002161	yes	yes	2,3	5.6033e-06	116.73			2			2	24674000	0	0	24674000
29129	359	YLGPAVLMQAYR	12	0	1380.72	ENSMMUP00000002161;ENSMMUP00000012414;ENSMMUP00000012413	ENSMMUP00000002161	yes	yes	2	2.8896e-28	185.08	5	6	6	5	6	6	257320000	91598000	121650000	44072000
571	360	AFFPNMVNMIVLDK	14	0	1637.83	ENSMMUP00000002169;ENSMMUP00000002170	ENSMMUP00000002169	yes	no	2	4.3386e-05	116.96	1		1	1		1	4418100	2703200	0	1714900
5768	360	ELGLTEQDIIDLPALFK	17	0	1914.04	ENSMMUP00000002169;ENSMMUP00000002170	ENSMMUP00000002169	yes	no	2	1.7293e-33	201.57	2	2	2	2	2	2	44714000	10758000	18300000	15656000
5820	360	ELLGPDFGYVTR	12	0	1365.69	ENSMMUP00000002169	ENSMMUP00000002169	yes	yes	2	5.4913e-06	134.49	1			1			3703600	3703600	0	0
9548	360	GLLEPLGLECTFIDDISAYHK	21	0	2390.18	ENSMMUP00000002169;ENSMMUP00000002170	ENSMMUP00000002169	yes	no	3	2.3028e-05	88.283	1	1	2	1	1	2	5484900	1111800	1335500	3037600
16472	360	LLSGGR	6	0	601.355	ENSMMUP00000002169	ENSMMUP00000002169	no	no	1	0.093268	47.045		1					10343000	0	10343000	0
26469	360	VGVFYVENPFFGQR	14	0	1657.83	ENSMMUP00000002169	ENSMMUP00000002169	yes	yes	2	0.00017638	106.32			2			2	12819000	0	0	12819000
28285	360	WLLSPSTTLR	10	0	1172.66	ENSMMUP00000002169	ENSMMUP00000002169	yes	yes	2	0.0015537	98.249	1	2	2	1	2	2	11056000	3262400	5114500	2679300
4122	363	DSPGFQPYFLVFR	13	0	1571.78	ENSMMUP00000002186;ENSMMUP00000031883	ENSMMUP00000002186	yes	no	2	5.772e-11	154.36	1	2	1	1	2	1	15752000	6407000	6817500	2527200
10004	363	GSAFEWVVR	9	0	1049.53	ENSMMUP00000002186	ENSMMUP00000002186	yes	yes	2	7.9086e-12	169.44	1	1	1	1	1	1	3543400	1613000	1586700	343730
24409	363	TCALYASLALLSGLSQEPH	19	0	2030.01	ENSMMUP00000002186;ENSMMUP00000031883	ENSMMUP00000002186	yes	no	3	0.00015018	82.007			1			1	272430	0	0	272430
2031	364	ATLELTHNWGTEDDETQSYHNGNSDPR	27	0	3086.32	ENSMMUP00000002187	ENSMMUP00000002187	yes	yes	3,4	4.7814e-07	80.786	3	4	6	3	4	6	354070000	93543000	113040000	147490000
2805	364	DFLLQQTMLR	10	0	1263.66	ENSMMUP00000002187	ENSMMUP00000002187	yes	yes	2	2.0987e-64	225.01	7	8	6	7	8	6	497000000	169940000	204430000	122630000
8089	364	FSLYFLAYEDK	11	0	1394.68	ENSMMUP00000002187	ENSMMUP00000002187	yes	yes	2	3.6593e-73	224.66	2	1	3	2	1	3	14559000	4860800	2805900	6892800
8090	364	FSLYFLAYEDKNDIPK	16	1	1961.98	ENSMMUP00000002187	ENSMMUP00000002187	yes	yes	2,3	0.00068995	101.53	5	3	6	5	3	6	147360000	78186000	17303000	51875000
8091	364	FSLYFLAYEDKNDIPKDK	18	2	2205.1	ENSMMUP00000002187	ENSMMUP00000002187	yes	yes	3,4	0.0050928	87.932	2	2	2	2	2	2	19689000	3799500	12797000	3093000
8922	364	GFGHIGIAVPDVHSACK	17	0	1763.88	ENSMMUP00000002187	ENSMMUP00000002187	yes	yes	2,3,4	1.6743e-24	190.41	16	13	15	16	13	15	1846600000	1005800000	364510000	476220000
8923	364	GFGHIGIAVPDVHSACKR	18	1	1919.98	ENSMMUP00000002187	ENSMMUP00000002187	yes	yes	2,3,4	3.9916e-06	123.29	3	2	2	3	2	2	23511000	15961000	5572600	1976800
9408	364	GLAFIQDPDGYWIEILNPNK	20	0	2302.16	ENSMMUP00000002187	ENSMMUP00000002187	yes	yes	2,3	5.3261e-98	236.27	16	17	14	16	17	14	3504100000	930750000	1605200000	968120000
13370	364	KATLELTHNWGTEDDETQSYHNGNSDPR	28	1	3214.42	ENSMMUP00000002187	ENSMMUP00000002187	yes	yes	2,3,4	4.0475e-08	82.302	2	3	3	2	3	3	743550000	333490000	349070000	60991000
26821	364	VLGMTLIQK	9	0	1001.59	ENSMMUP00000002187	ENSMMUP00000002187	yes	yes	2	0.0095792	81.972	1	1		1	1		13657000	5760700	7895900	0
1337	365	ALQDAFSGLFWQPS	14	0	1565.75	ENSMMUP00000002190	ENSMMUP00000002190	yes	yes	2	2.9499e-11	158.93	2	3	2	2	3	2	8706600	1357300	5045100	2304200
15058	365	LEEALYEYQPLQIETYGPHVPELEMLGR	28	0	3316.63	ENSMMUP00000002190	ENSMMUP00000002190	yes	yes	3	0.00014854	62.082	1			1			6673100	6673100	0	0
5	366	AAAAQFQVPWLESVPIAVSNNIDEEALAR	29	0	3108.59	ENSMMUP00000002192	ENSMMUP00000002192	yes	yes	3	2.362e-44	145.19		2			2		27040000	0	27040000	0
1783	366	AQVWLEHVCAHLGLGVQEPHPGER	24	0	2718.34	ENSMMUP00000002192	ENSMMUP00000002192	yes	yes	3	4.2931e-10	111.4	1	1	1	1	1	1	7492400	2607000	3243500	1642000
1788	366	ARDAAEFELFFR	12	1	1470.73	ENSMMUP00000002192	ENSMMUP00000002192	yes	yes	2,3	1.5754e-06	143.98	4	2	1	4	2	1	6510200	2996800	3068500	444860
2451	366	DAAEFELFFR	10	0	1243.59	ENSMMUP00000002192	ENSMMUP00000002192	yes	yes	2	2.3674e-39	208.63	2	1	2	2	1	2	15429000	7833200	4832400	2763900
2467	366	DADVQFLASVLPPDTDPAFFEHLR	24	0	2699.32	ENSMMUP00000002192	ENSMMUP00000002192	yes	yes	2,3,4	2.4689e-39	162.39	4	5	5	4	5	5	250180000	61046000	105870000	83258000
14965	366	LDSGDLLQQAQEIR	14	0	1584.81	ENSMMUP00000002192	ENSMMUP00000002192	yes	yes	2	5.3893e-06	133.48	1	1	1	1	1	1	19273000	10653000	4772200	3847000
17221	366	LRDADVQFLASVLPPDTDPAFFEHLR	26	1	2968.51	ENSMMUP00000002192	ENSMMUP00000002192	yes	yes	3,4	6.6053e-21	126.32	3	3	2	3	3	2	20052000	4807000	13156000	2089900
10342	367	GVVQELQQAISK	12	0	1298.72	ENSMMUP00000002196;ENSMMUP00000002197;ENSMMUP00000002195;ENSMMUP00000027267	ENSMMUP00000002196	yes	no	2	1.1142e-21	179.67	3	2	2	3	2	2	112960000	75816000	28991000	8149200
10343	367	GVVQELQQAISKLEAR	16	1	1767.98	ENSMMUP00000002196;ENSMMUP00000002197;ENSMMUP00000002195;ENSMMUP00000027267	ENSMMUP00000002196	yes	no	3	0.00024692	119.25	1	2		1	2		6730700	2141400	4589400	0
17791	367	LVPVGYGIR	9	0	972.576	ENSMMUP00000002196;ENSMMUP00000002197;ENSMMUP00000002195	ENSMMUP00000002196	yes	no	2	0.043651	63.565		1			1		1046400	0	1046400	0
22944	367	SIQLDGLVWGASK	13	0	1372.74	ENSMMUP00000002196;ENSMMUP00000002197;ENSMMUP00000002195;ENSMMUP00000027267	ENSMMUP00000002196	yes	no	2,3	1.2374e-24	186.05	6	4	4	6	4	4	317450000	117800000	130060000	69589000
23047	367	SLAGTSGPGASSGPSGDHSELVVR	24	0	2224.07	ENSMMUP00000002196;ENSMMUP00000002197	ENSMMUP00000002196	yes	no	3	0.00059843	63.488	2	3	2	2	3	2	42723000	15115000	20680000	6927600
920	368	AHWFEIQHIQPSPLQCNR	18	0	2260.1	ENSMMUP00000002223	ENSMMUP00000002223	yes	yes	2,3,4	1.8272e-13	164.68	5	2	3	5	2	3	124440000	40983000	31354000	52099000
17792	368	LVPVHLDSIV	10	0	1090.64	ENSMMUP00000002223	ENSMMUP00000002223	yes	yes	2	0.023323	67.897	1			1			1475600	1475600	0	0
2004	369	ATFVANDLDWLLALPHDK	18	0	2038.05	ENSMMUP00000002250;ENSMMUP00000037116	ENSMMUP00000002250	yes	no	3	0.0094558	57.973			2			2	4225200	0	0	4225200
3801	369	DNIPALVEEYLER	13	0	1559.78	ENSMMUP00000002250;ENSMMUP00000037116	ENSMMUP00000002250	yes	no	2	3.2379e-07	136.33	3	3	4	3	3	4	18491000	4282700	7273500	6934400
24080	369	SVFLTFLR	8	0	981.565	ENSMMUP00000002250;ENSMMUP00000037116	ENSMMUP00000002250	yes	no	2	0.0006241	131.06	2	1	1	2	1	1	1802900	1802900	0	0
24406	369	TAYILQAVESAWEGVDR	17	0	1906.94	ENSMMUP00000002250;ENSMMUP00000037116	ENSMMUP00000002250	yes	no	2	0.0045377	105.06			1			1	973090	0	0	973090
24407	369	TAYILQAVESAWEGVDRR	18	1	2063.04	ENSMMUP00000002250;ENSMMUP00000037116	ENSMMUP00000002250	yes	no	3	0.055112	47.545		1			1		1178900	0	1178900	0
2559	370	DASVVGFFDDLFSEAHSEFLK	21	0	2359.1	ENSMMUP00000002254;ENSMMUP00000033719;ENSMMUP00000033720	ENSMMUP00000002254	yes	no	3	2.9137e-07	114.29	1		1	1		1	3358200	1111900	0	2246200
3550	370	DLLIAYYDVDYEK	13	0	1618.78	ENSMMUP00000002254;ENSMMUP00000033719;ENSMMUP00000033720	ENSMMUP00000002254	yes	no	2	1.218e-24	186.13	17	15	15	17	15	15	560030000	194850000	206130000	159060000
5922	370	ELSDFISYLQR	11	0	1369.69	ENSMMUP00000002254;ENSMMUP00000033719	ENSMMUP00000002254	yes	no	2,3	1.9739e-73	229.53	17	18	12	17	18	12	3652200000	1069500000	1546600000	1036200000
7451	370	FIQENIFGICPHMTEDNKDLIQGK	24	1	2846.37	ENSMMUP00000002254;ENSMMUP00000033719;ENSMMUP00000033720	ENSMMUP00000002254	yes	no	2,3,4	1.7042e-21	137.64	9	11	7	9	11	7	1974800000	828510000	623750000	522560000
7668	370	FLQDYFDGNLK	11	0	1358.65	ENSMMUP00000002254;ENSMMUP00000033719;ENSMMUP00000033720	ENSMMUP00000002254	yes	no	2	1.7689e-36	201.46	6	9	12	6	9	12	598040000	206300000	186760000	204980000
7669	370	FLQDYFDGNLKR	12	1	1514.75	ENSMMUP00000002254;ENSMMUP00000033719;ENSMMUP00000033720	ENSMMUP00000002254	yes	no	2,3	2.1464e-36	200.93	10	9	10	10	9	10	1588400000	650130000	651160000	287130000
8297	370	FVMQEEFSR	9	0	1171.53	ENSMMUP00000002254;ENSMMUP00000033719;ENSMMUP00000033720	ENSMMUP00000002254	yes	no	2	7.5489e-08	162.36	3	3	2	3	3	2	41785000	6038500	11374000	24373000
8975	370	GFPTIYFSPANK	12	0	1340.68	ENSMMUP00000002254;ENSMMUP00000033719	ENSMMUP00000002254	yes	no	2	7.8436e-11	157.68	7	8	8	7	8	8	1205900000	543070000	489760000	173070000
8976	370	GFPTIYFSPANKK	13	1	1468.77	ENSMMUP00000002254;ENSMMUP00000033719	ENSMMUP00000002254	yes	no	2	5.1229e-07	136.38	6	5	1	6	5	1	241760000	154260000	81608000	5896700
13578	370	KFIQENIFGICPHMTEDNKDLIQGK	25	2	2974.47	ENSMMUP00000002254;ENSMMUP00000033719;ENSMMUP00000033720	ENSMMUP00000002254	yes	no	3,4	6.6128e-12	105.96	2	3	1	2	3	1	336160000	115270000	150650000	70243000
14306	370	KTFSHELSDFGLESTAGEIPVVAIR	25	1	2702.39	ENSMMUP00000002254;ENSMMUP00000033719;ENSMMUP00000033720	ENSMMUP00000002254	yes	no	2,3,4	4.1541e-57	176.9	9	11	9	9	11	9	2643900000	896530000	883830000	863530000
14474	370	KYEGGRELSDFISYLQR	17	2	2060.03	ENSMMUP00000002254;ENSMMUP00000033719	ENSMMUP00000002254	yes	no	2,3	3.5982e-06	150.76	1	2	1	1	2	1	30172000	2280800	26990000	901440
18179	370	MDATANDVPSPYEVR	15	0	1663.75	ENSMMUP00000002254;ENSMMUP00000033719	ENSMMUP00000002254	yes	no	2	4.2241e-10	158.29	3	4	2	3	4	2	345070000	80194000	171690000	93187000
20767	370	QAGPASVPLRTEEEFK	16	1	1757.89	ENSMMUP00000002254;ENSMMUP00000033719;ENSMMUP00000033720	ENSMMUP00000002254	yes	no	3	0.018987	68.277	1	1		1	1		1603500	990320	613150	0
23357	370	SLVNEYDDNGEGIILFR	17	0	1952.95	ENSMMUP00000002254;ENSMMUP00000033719;ENSMMUP00000033720	ENSMMUP00000002254	yes	no	2,3	1.6678e-43	210.39	11	7	10	11	7	10	919400000	344120000	330170000	245100000
23358	370	SLVNEYDDNGEGIILFRPSHLTNK	24	1	2730.36	ENSMMUP00000002254;ENSMMUP00000033719;ENSMMUP00000033720	ENSMMUP00000002254	yes	no	2,3,4	1.6909e-21	137.72	8	9	10	8	9	10	3337300000	1230900000	1127600000	978800000
23359	370	SLVNEYDDNGEGIILFRPSHLTNKFEDK	28	2	3249.59	ENSMMUP00000002254;ENSMMUP00000033719;ENSMMUP00000033720	ENSMMUP00000002254	yes	no	3	0.0017624	66.52	1	1	2	1	1	2	123410000	63190000	47654000	12564000
24659	370	TFSHELSDFGLESTAGEIPVVAIR	24	0	2574.3	ENSMMUP00000002254;ENSMMUP00000033719;ENSMMUP00000033720	ENSMMUP00000002254	yes	no	2,3,4	1.843e-79	211.87	19	19	22	19	19	22	2483400000	648490000	780330000	1054600000
27846	370	VVVAENFDEIVNNENK	16	0	1831.9	ENSMMUP00000002254;ENSMMUP00000033719	ENSMMUP00000002254	yes	no	2,3	5.1659e-54	222.64	3	4	4	3	4	4	230370000	58373000	82914000	89083000
28958	370	YGVSGYPTLK	10	0	1083.56	ENSMMUP00000002254;ENSMMUP00000033719;ENSMMUP00000033720	ENSMMUP00000002254	yes	no	2	9.1512e-05	125.97	1			1			435500	435500	0	0
1008	372	AIQAYGMKPHDIFEANDLFENGNMTQVQTTLVALAGLAK	39	1	4219.11	ENSMMUP00000002262	ENSMMUP00000002262	yes	yes	4	6.7756e-25	92.449		2			2		10880000	0	10880000	0
2954	372	DGIILCELINK	11	0	1286.69	ENSMMUP00000002262	ENSMMUP00000002262	yes	yes	2	1.3439e-26	189.58	2	2	2	2	2	2	56778000	20085000	30621000	6072600
8937	372	GFHTTIDIGVK	11	0	1186.63	ENSMMUP00000002262	ENSMMUP00000002262	yes	yes	2,3	7.8625e-05	130.98	3	2	3	3	2	3	1927200	1048200	284060	594930
14406	372	KVNESSLNWPQLENIGNFIK	20	1	2329.21	ENSMMUP00000002262	ENSMMUP00000002262	yes	yes	2,3	8.435e-14	152.04	1	2	3	1	2	3	121420000	21336000	35129000	64951000
17577	372	LTLQPVDNSTISLQMGTNK	19	0	2059.06	ENSMMUP00000002262	ENSMMUP00000002262	yes	yes	2	1.2144e-09	132.74	1	2	1	1	2	1	63369000	14886000	30601000	17882000
18790	372	MQTDKPFDQTTISLQMGTNK	20	1	2283.09	ENSMMUP00000002262	ENSMMUP00000002262	yes	yes	2,3	2.4601e-24	178.77	3	3	6	3	3	6	172890000	50432000	69025000	53433000
20521	372	PHDIFEANDLFENGNMTQVQTTLVALAGLAK	31	0	3356.67	ENSMMUP00000002262	ENSMMUP00000002262	yes	yes	3	2.4044e-42	128.3			1			1	4337300	0	0	4337300
27101	372	VNESSLNWPQLENIGNFIK	19	0	2201.11	ENSMMUP00000002262	ENSMMUP00000002262	yes	yes	2,3	2.3361e-31	187.78	10	11	10	10	11	10	852510000	245470000	371720000	235320000
6133	373	ENNAVYAFLGLTAPPGSK	18	0	1847.94	ENSMMUP00000002263	ENSMMUP00000002263	yes	yes	2,3	3.5359e-19	176.11	8	9	9	8	9	9	699580000	154710000	323660000	221200000
6166	373	ENVPENSRPATGYPLPPQIFNESQYR	26	1	3002.45	ENSMMUP00000002263	ENSMMUP00000002263	yes	yes	2,3,4	7.0463e-28	144.95	6	5	6	6	5	6	814380000	242940000	326010000	245430000
8711	373	GDYDAFFEAR	10	0	1189.5	ENSMMUP00000002263	ENSMMUP00000002263	yes	yes	2	9.7031e-10	164.33	6	6	5	6	6	5	158570000	64784000	66287000	27500000
14231	373	KQQDVLGFLEANK	13	1	1488.79	ENSMMUP00000002263	ENSMMUP00000002263	yes	yes	2,3	4.457e-18	169.4	8	8	6	8	8	6	145210000	65286000	52255000	27666000
20418	373	PATGYPLPPQIFNESQYR	18	0	2077.03	ENSMMUP00000002263	ENSMMUP00000002263	yes	yes	2	2.5948e-09	149.86	2	3	3	2	3	3	51296000	7956500	19046000	24293000
21215	373	QQDVLGFLEANK	12	0	1360.7	ENSMMUP00000002263	ENSMMUP00000002263	yes	yes	2	0.0023344	86.772	1	2	2	1	2	2	79150000	9349600	35865000	33936000
706	375	AGEIITVLDDSDPNWWK	17	0	1957.94	ENSMMUP00000002273	ENSMMUP00000002273	yes	yes	2,3	1.004e-55	218.68	3	1	5	3	1	5	52477000	13673000	8941900	29862000
2737	375	DFASEVSNVLNK	12	0	1321.65	ENSMMUP00000002273	ENSMMUP00000002273	yes	yes	2	8.8409e-07	140.14	1			1			3635500	3635500	0	0
8814	375	GETHQGIGLFPSNFVTADLTAEPEMIK	27	0	2901.42	ENSMMUP00000002273	ENSMMUP00000002273	yes	yes	3	4.6958e-08	86.946	2	1	1	2	1	1	50895000	20514000	14865000	15517000
16601	375	LMNEDPMYSMYAK	13	0	1591.67	ENSMMUP00000002273	ENSMMUP00000002273	yes	yes	2	1.6696e-07	141.54	1	2	2	1	2	2	15577000	1450500	8070200	6056700
2840	377	DFPGFPGIPK	10	0	1073.55	ENSMMUP00000002280	ENSMMUP00000002280	yes	yes	2	0.0049203	86.67		2			2		1049300	0	1049300	0
9299	377	GINILDYHFHK	11	0	1355.7	ENSMMUP00000002280	ENSMMUP00000002280	yes	yes	3	0.02119	64.297	1			1			808350	808350	0	0
22290	377	SCDNIMIHFPVPSQWIK	17	0	2071	ENSMMUP00000002280	ENSMMUP00000002280	yes	yes	3	3.7601e-07	146.96	1	1	1	1	1	1	9835800	3391000	3119000	3325800
26429	377	VGLPDEVNPHQAESLGFQSDDLPQFPYFR	29	0	3301.57	ENSMMUP00000002280	ENSMMUP00000002280	yes	yes	3	1.1959e-06	78.098		1			1		11206000	0	11206000	0
2103	378	AVCVLKGDSPVQGTINFEQK	20	1	2189.12	ENSMMUP00000002283	ENSMMUP00000002283	yes	yes	3	1.033e-10	137.73	2	4		2	4		56852000	17862000	38990000	0
8677	378	GDSPVQGTINFEQK	14	0	1518.73	ENSMMUP00000002283	ENSMMUP00000002283	yes	yes	2	1.3386e-52	220.4	4	3	1	4	3	1	59781000	16368000	35667000	7745300
11301	378	HVGDLGNVTAGK	12	0	1166.6	ENSMMUP00000002283	ENSMMUP00000002283	yes	yes	2	0.13113	40.767	1			1			33791	33791	0	0
11302	378	HVGDLGNVTAGKDGVAKVSFEDSVISLSGDHSIIGR	36	2	3635.85	ENSMMUP00000002283	ENSMMUP00000002283	yes	yes	5	1.9792e-06	64.767	1			1			13155000	13155000	0	0
14548	378	LACGVIGIAQ	10	0	1000.54	ENSMMUP00000002283	ENSMMUP00000002283	yes	yes	2	0.045914	58.981	1			1			1279900	1279900	0	0
27455	378	VSFEDSVISLSGDHSIIGR	19	0	2017.01	ENSMMUP00000002283	ENSMMUP00000002283	yes	yes	2,3	5.8143e-66	222.64	21	16	20	21	16	20	10452000000	3442300000	4112200000	2897400000
27886	378	VWGSITGLTEGLHGFHVHQFGDNTQGCTSAGPHFNPLSR	39	0	4217.99	ENSMMUP00000002283	ENSMMUP00000002283	yes	yes	3,4,5,6	7.9667e-36	105.9	6	4	2	6	4	2	730780000	92793000	613210000	24771000
25550	379	TTQQDVASLLEEFGPIESINMIPPR	25	0	2784.4	ENSMMUP00000002284	ENSMMUP00000002284	yes	yes	2,3	3.5917e-11	101.29	4	3	4	4	3	4	90738000	20744000	40261000	29733000
864	380	AHETAFLSWFR	11	0	1363.67	ENSMMUP00000002293	ENSMMUP00000002293	yes	yes	2,3	6.9448e-26	183.03	3	2	4	3	2	4	9504500	3213800	850830	5439900
13342	380	KAHETAFLSWFR	12	1	1491.76	ENSMMUP00000002293	ENSMMUP00000002293	yes	yes	2,3,4	0.00043634	111.94	3		2	3		2	482310	295600	0	186710
2705	381	DEPPLDFPDTLEGFEYAFNEK	21	0	2472.1	ENSMMUP00000002298;ENSMMUP00000034334	ENSMMUP00000002298	yes	no	2	3.4131e-05	83.063		1			1		4275500	0	4275500	0
13403	381	KDEPPLDFPDTLEGFEYAFNEK	22	1	2600.2	ENSMMUP00000002298;ENSMMUP00000034334	ENSMMUP00000002298	yes	no	2,3	4.0853e-25	151.96	4	3	4	4	3	4	102410000	36300000	32801000	33308000
22558	381	SFIFMSEDALTNPQK	15	0	1726.82	ENSMMUP00000002298;ENSMMUP00000034334	ENSMMUP00000002298	yes	no	2	0.0018832	78.191	1			1			3051300	3051300	0	0
27591	381	VTAVALTDSVHNVWHQEAGK	20	0	2161.09	ENSMMUP00000002298;ENSMMUP00000034334	ENSMMUP00000002298	yes	no	4	0.016594	49.463	2	1	1	2	1	1	65365000	32709000	8425700	24231000
5332	382	EHAIEEWKELIYK	13	1	1686.86	ENSMMUP00000002308	ENSMMUP00000002308	yes	yes	3	0.025573	72.34	1			1			462560	462560	0	0
7116	382	FEELFPDWIFPSESER	16	0	2026.93	ENSMMUP00000002308	ENSMMUP00000002308	yes	yes	2,3	1.6789e-10	162.81	6	5	7	6	5	7	110500000	24442000	41180000	44882000
11104	382	HPYITVWYDPAEAEAPPPQIYDAQLEER	28	0	3297.56	ENSMMUP00000002308	ENSMMUP00000002308	yes	yes	3	2.656e-35	138.44	2	2	2	2	2	2	74805000	21370000	28183000	25252000
19493	382	NIISLLNVFTPQK	13	0	1485.86	ENSMMUP00000002308;ENSMMUP00000010941;ENSMMUP00000035034;ENSMMUP00000002307	ENSMMUP00000002308	yes	no	2	1.9998e-42	210.91	2	1	3	2	1	3	16585000	6099500	3325300	7160100
1061	383	AKDIVPGDIVEIAVGDKVPADIR	23	2	2389.32	ENSMMUP00000002322	ENSMMUP00000002322	yes	yes	4	3.4491e-06	100.39	6	5	4	6	5	4	133310000	51149000	53411000	28745000
3250	383	DIVPGDIVEIAVGDKVPADIR	21	1	2190.19	ENSMMUP00000002322	ENSMMUP00000002322	yes	yes	3	0.066641	47.754		1			1		10413000	0	10413000	0
4990	383	EEMHLEDSANFIK	13	0	1561.71	ENSMMUP00000002322	ENSMMUP00000002322	yes	yes	2,3	8.5532e-42	203.39	4	3	3	4	3	3	43793000	10357000	17142000	16294000
12903	383	ISLPVILMDETLK	13	0	1470.84	ENSMMUP00000002322	ENSMMUP00000002322	yes	yes	2	1.0173e-05	127.79	4	3	4	4	3	4	116620000	36004000	33737000	46875000
13117	383	IVEFLQSFDEITAMTGDGVNDAPALK	26	0	2780.36	ENSMMUP00000002322	ENSMMUP00000002322	yes	yes	2,3	7.2325e-36	147.26	3	4	5	3	4	5	90689000	19277000	42647000	28765000
13118	383	IVEFLQSFDEITAMTGDGVNDAPALKK	27	1	2908.45	ENSMMUP00000002322	ENSMMUP00000002322	yes	yes	3	4.8593e-12	99.11	1	2	2	1	2	2	51264000	10921000	19388000	20955000
18704	383	MNVFDTELK	9	0	1095.53	ENSMMUP00000002322	ENSMMUP00000002322	yes	yes	2	0.0928	53.683	2		1	2		1	5380200	3195300	0	2184900
19055	383	NAENAIEALKEYEPEMGK	18	1	2034.96	ENSMMUP00000002322	ENSMMUP00000002322	yes	yes	2,3	9.0901e-13	163.56	1	4	3	1	4	3	65351000	16837000	30048000	18467000
21527	383	REEMHLEDSANFIK	14	1	1717.81	ENSMMUP00000002322	ENSMMUP00000002322	yes	yes	3	0.015519	67.115	1			1			925220	925220	0	0
24379	383	TASEMVLADDNFSTIVAAVEEGR	23	0	2424.15	ENSMMUP00000002322;ENSMMUP00000030965	ENSMMUP00000002322	yes	no	2,3	1.1173e-69	209.9		2	7		2	7	30169000	0	19970000	10199000
25583	383	TVEEVLGHFGVNESTGLSLEQVKK	24	1	2599.35	ENSMMUP00000002322	ENSMMUP00000002322	yes	yes	3	4.3588e-10	112.36	1			1			4897000	4897000	0	0
26133	383	VEGDTCSLNEFTITGSTYAPIGEVHKDDKPVK	32	2	3506.69	ENSMMUP00000002322	ENSMMUP00000002322	yes	yes	4	0.13075	40.625		1			1		6282200	0	6282200	0
27627	383	VTFYQLSHFLQCK	13	0	1669.83	ENSMMUP00000002322	ENSMMUP00000002322	yes	yes	2,3	0.0011278	124.3	1	1	2	1	1	2	16107000	7774500	5220400	3112500
3934	385	DPVIPSIQLFPGLR	14	0	1550.88	ENSMMUP00000002330	ENSMMUP00000002330	yes	yes	2	0.00085047	88.552		2	1		2	1	5158000	0	4520700	637290
19310	385	NFLSLNYLAEYLQPK	15	0	1811.95	ENSMMUP00000002330	ENSMMUP00000002330	yes	yes	2,3	7.6868e-99	249.33	6	6	6	6	6	6	32482000	7848600	13707000	10926000
19326	385	NFPHGNEHLLNWAR	14	0	1703.83	ENSMMUP00000002330	ENSMMUP00000002330	yes	yes	2,3	1.0585e-05	130.61	2	1	2	2	1	2	5630700	3205800	705510	1719400
12665	387	IPMPVNFNEPLSMLQR	16	0	1884.96	ENSMMUP00000002332	ENSMMUP00000002332	no	no	2,3	2.7303e-53	215.87	5	4	4				60842000	26237000	22015000	12590000
12707	387	IPYKPNYSLNLWSIMK	16	1	1966.04	ENSMMUP00000002332	ENSMMUP00000002332	yes	yes	3	0.036145	73.296		1			1		1523400	0	1523400	0
12816	387	IRLEETLEQLAK	12	1	1441.81	ENSMMUP00000002332	ENSMMUP00000002332	yes	yes	2,3	7.6695e-20	172.11	6	4	4	6	4	4	32457000	14690000	12505000	5262500
17502	387	LTEDLEYHELLDR	13	0	1644.8	ENSMMUP00000002332;ENSMMUP00000037271	ENSMMUP00000002332	yes	no	2,3	9.184e-15	167.14	7	6	6	7	6	6	73589000	26822000	31102000	15665000
17902	387	LWIDQSGEIDIVNHK	15	0	1765.9	ENSMMUP00000002332;ENSMMUP00000037271	ENSMMUP00000002332	yes	no	3	0.004019	70.622	1	1	1	1	1	1	8081700	3224600	1328200	3528900
20464	387	PFNPLLGETFELDR	14	0	1646.83	ENSMMUP00000002332;ENSMMUP00000037271	ENSMMUP00000002332	yes	no	2	0.038688	54.524			1			1	2771600	0	0	2771600
23311	387	SLSELESLKLPAESNEK	17	1	1872.97	ENSMMUP00000002332	ENSMMUP00000002332	yes	yes	3	0.0094258	71.98	1	1	1	1	1	1	7416400	1634500	4285700	1496200
25439	387	TSKPFNPLLGETFELDR	17	1	1963.01	ENSMMUP00000002332;ENSMMUP00000037271	ENSMMUP00000002332	yes	no	3	0.00011145	131.4	2	2	2	2	2	2	32143000	10992000	10123000	11029000
25440	387	TSKPFNPLLGETFELDRLEENGYR	24	2	2824.4	ENSMMUP00000002332;ENSMMUP00000037271	ENSMMUP00000002332	yes	no	3,4	0.001132	76.704	2	2	2	2	2	2	43369000	23922000	8948200	10499000
26496	387	VHFALLGTWDEK	12	0	1414.72	ENSMMUP00000002332;ENSMMUP00000037271	ENSMMUP00000002332	yes	no	2,3	1.7904e-09	148.56	1	2	3	1	2	3	40093000	19764000	13493000	6835900
28520	387	WVTALELAK	9	0	1029.59	ENSMMUP00000002332	ENSMMUP00000002332	yes	yes	2	0.025119	69.275			1			1	760730	0	0	760730
1931	388	ASSGMADNANHLPFFFGNITR	21	0	2266.06	ENSMMUP00000002336;ENSMMUP00000002337	ENSMMUP00000002336	yes	no	2,3	2.8583e-29	170.14	3	3	3	3	3	3	18426000	5179700	8022700	5223200
4903	388	EEAEDYLVQGGMSDGLYLLR	20	0	2257.06	ENSMMUP00000002336;ENSMMUP00000002337	ENSMMUP00000002336	yes	no	2,3	3.9082e-18	161.22	2	1	5	2	1	5	20468000	7554600	2623700	10290000
13551	388	KFDTLWQLVEHYSYK	15	1	1955.98	ENSMMUP00000002336;ENSMMUP00000002337	ENSMMUP00000002336	yes	no	3	6.5335e-05	122.08	2	1	1	2	1	1	687910	346110	155400	186400
19199	388	NEANDPALKDELLAEANVMQQLDNPYIVR	29	1	3282.62	ENSMMUP00000002336;ENSMMUP00000002337	ENSMMUP00000002336	yes	no	3	2.7853e-14	101.86	1	1	2	1	1	2	52897000	16817000	15701000	20379000
20344	388	NYLGGFALSVAHGR	14	0	1460.75	ENSMMUP00000002336;ENSMMUP00000002337	ENSMMUP00000002336	yes	no	2,3	6.5212e-06	132.86	2	1	3	2	1	3	62118000	37713000	8914300	15491000
24746	388	TGPFEDLKENLIR	13	1	1530.8	ENSMMUP00000002336;ENSMMUP00000002337	ENSMMUP00000002336	yes	no	3	0.05798	65.395	3	1		3	1		9119300	7239000	1880300	0
28543	388	WYAPECINYYK	11	0	1505.66	ENSMMUP00000002336;ENSMMUP00000002337	ENSMMUP00000002336	yes	no	2	0.0016426	97.734	1	1		1	1		10261000	4099700	6161700	0
3586	389	DLNLDGFNDIVIGAPLEDDHGGAVYIYHGSGK	32	0	3370.61	ENSMMUP00000002341;ENSMMUP00000002340	ENSMMUP00000002341	yes	no	3,4	2.1651e-17	101.43	2	2	2	2	2	2	61830000	23237000	19807000	18786000
7170	389	FEYQMSLEPTK	11	0	1371.64	ENSMMUP00000002341;ENSMMUP00000002340	ENSMMUP00000002341	yes	no	2	0.0066314	97.911		1			1		5205000	0	5205000	0
8063	389	FSIAILGSYNR	11	0	1239.66	ENSMMUP00000002341;ENSMMUP00000002340	ENSMMUP00000002341	yes	no	2	4.0101e-26	186.46	2	1	2	2	1	2	7495100	5801300	1693700	0
14071	389	KNEPLASYLGYTVNSATASSGDVLYIAGQPR	31	1	3241.63	ENSMMUP00000002341;ENSMMUP00000002340	ENSMMUP00000002341	yes	no	3	7.9397e-32	119.85			1			1	7742000	0	0	7742000
20096	389	NSMTFSGPVEDMFGYTVQQYENEEGK	26	0	2986.26	ENSMMUP00000002341;ENSMMUP00000002340	ENSMMUP00000002341	yes	no	2,3	1.3601e-78	198.22	4	5	8	4	5	8	70213000	14464000	24959000	30790000
22999	389	SKEDTIYEADLQYR	14	1	1729.82	ENSMMUP00000002341;ENSMMUP00000002340	ENSMMUP00000002341	yes	no	3	0.001711	96.591	2		1	2		1	7851200	7578500	0	272740
24894	389	TIVHYSPNLVFSGIEAIQK	19	0	2115.14	ENSMMUP00000002341	ENSMMUP00000002341	yes	yes	3	2.7149e-10	137.45	2	4	3	2	4	3	45848000	14444000	17147000	14257000
28510	389	WVLIGSPLVGQPK	13	0	1392.81	ENSMMUP00000002341;ENSMMUP00000002340	ENSMMUP00000002341	yes	no	2	0.015193	103.43	1	2	2	1	2	2	15553000	4172200	6488200	4892500
1516	390	ANEAMAIDTLLISDELFR	18	0	2021.01	ENSMMUP00000002343	ENSMMUP00000002343	yes	yes	2,3	9.9002e-60	219.23	2	7	2	2	7	2	29448000	4457600	17838000	7152000
3773	390	DNAGQVTLVPEEPEDMWHTYNLVQVGDSLR	30	0	3411.6	ENSMMUP00000002343	ENSMMUP00000002343	yes	yes	3	2.9201e-07	78.429	1	1	2	1	1	2	20873000	4880100	8118700	7874300
2642	391	DDMESLGYVLMYFNR	15	0	1851.82	ENSMMUP00000033886;ENSMMUP00000002346	ENSMMUP00000033886	yes	no	2,3	4.0576e-06	145.29	1	1	2	1	1	2	1971700	283240	835610	852890
3156	391	DIKPDNFLMGIGR	13	1	1474.76	ENSMMUP00000033886;ENSMMUP00000002346	ENSMMUP00000033886	yes	no	3	0.00255	100.22	1			1			1874900	1874900	0	0
15347	391	LFLIDFGLAK	10	0	1135.66	ENSMMUP00000033886;ENSMMUP00000002346;ENSMMUP00000006638	ENSMMUP00000033886	yes	no	2	1.5794e-11	155.42	1	1	2	1	1	2	2479600	0	673620	1806000
21476	391	RDDMESLGYVLMYFNR	16	1	2007.92	ENSMMUP00000033886;ENSMMUP00000002346	ENSMMUP00000033886	yes	no	3	8.0741e-07	148.91	1	1	1	1	1	1	6637900	2240600	2772700	1624500
9859	392	GPSFADMEVLYWTHVK	16	0	1878.9	ENSMMUP00000002350;ENSMMUP00000016560	ENSMMUP00000002350	yes	no	3	0.00023257	98.676		1	2		1	2	994120	0	452670	541460
17022	392	LQDFHQWYLAAYADHADSR	19	0	2306.05	ENSMMUP00000002350;ENSMMUP00000016560	ENSMMUP00000002350	yes	no	4	0.00015896	81.346	1	1	1	1	1	1	11519000	2980400	4781000	3757800
1328	393	ALPLALVLHELGAGR	15	0	1528.91	ENSMMUP00000002352;ENSMMUP00000002353	ENSMMUP00000002352	yes	no	2,3	5.9235e-31	200.13	5	7	6	5	7	6	52839000	11397000	32556000	8886200
1600	393	APFAPPSPFAELVLPPQQ	18	0	1905	ENSMMUP00000002352;ENSMMUP00000002353	ENSMMUP00000002352	yes	no	3	2.0238e-06	115.1	1			1			1441200	1441200	0	0
4380	393	DVTATVDSLPLITASILSK	19	0	1943.08	ENSMMUP00000002352;ENSMMUP00000002353	ENSMMUP00000002352	yes	no	3	2.4216e-23	174.87		1			1		1045600	0	1045600	0
17086	393	LQGMDLEETSVLTQALAQSGQQLEWPEAWHQQLVDK	36	0	4106.01	ENSMMUP00000002352;ENSMMUP00000002353	ENSMMUP00000002352	yes	no	3,4	1.5855e-17	83.834	1	2	1	1	2	1	77938000	11336000	55156000	11446000
97	394	AAHIFTEALVCHQIR	15	0	1764.91	ENSMMUP00000002359;ENSMMUP00000037979;ENSMMUP00000002358;ENSMMUP00000037974	ENSMMUP00000002359	yes	no	4	0.0020508	77.597		1			1		511080	0	511080	0
8605	394	GDFLFSSDHLIEMATK	16	0	1809.86	ENSMMUP00000002359;ENSMMUP00000037979;ENSMMUP00000002358;ENSMMUP00000037974;ENSMMUP00000037973	ENSMMUP00000002359	yes	no	3	5.058e-05	115.91	2	1	2	2	1	2	26812000	8643900	8031300	10137000
8660	394	GDPLGGVISNYLLEK	15	0	1573.84	ENSMMUP00000002359;ENSMMUP00000037979;ENSMMUP00000002358;ENSMMUP00000037974	ENSMMUP00000002359	yes	no	2	1.2089e-07	156	2	2	2	2	2	2	16637000	3042100	6199400	7395200
15404	394	LFSWLVNR	8	0	1033.57	ENSMMUP00000002359;ENSMMUP00000037979;ENSMMUP00000002358;ENSMMUP00000037974	ENSMMUP00000002359	yes	no	2	0.045495	84.568	1			1			3403500	3403500	0	0
19346	394	NFYELSPHIFALSDEAYR	18	0	2171.03	ENSMMUP00000002359	ENSMMUP00000002359	yes	yes	2,3	4.5499e-36	199.41	3	6	2	3	6	2	80141000	42846000	25030000	12265000
20295	394	NWPSRPYLFLDSTHK	15	1	1859.93	ENSMMUP00000002359;ENSMMUP00000037979;ENSMMUP00000002358;ENSMMUP00000037974;ENSMMUP00000037973	ENSMMUP00000002359	yes	no	3	0.013282	73.022		1	1		1	1	15583000	0	8731600	6851500
22763	394	SGVEVLFNELEIPVEEYSFGR	21	0	2412.18	ENSMMUP00000002359;ENSMMUP00000037979;ENSMMUP00000002358;ENSMMUP00000037974	ENSMMUP00000002359	yes	no	2,3	7.1511e-11	127.5	2	3	1	2	3	1	13210000	3181600	7548800	2479900
27031	394	VLYQVEGFVDKNNDLLYR	18	1	2184.12	ENSMMUP00000002359;ENSMMUP00000037979;ENSMMUP00000002358;ENSMMUP00000037974	ENSMMUP00000002359	yes	no	3	0.013206	66.826	1	1		1	1		12163000	5459800	6702800	0
27547	394	VSTTLNVAQAYYAR	14	0	1555.8	ENSMMUP00000002359;ENSMMUP00000037979;ENSMMUP00000002358;ENSMMUP00000037974	ENSMMUP00000002359	yes	no	2	2.2144e-05	124.51	1	1		1	1		6465300	2277700	4187600	0
62	397	AAFFVTLDETEQGYR	15	0	1745.83	ENSMMUP00000002371;ENSMMUP00000019343	ENSMMUP00000002371	yes	no	2	4.1722e-05	123.29		1			1		3155600	0	3155600	0
14167	397	KPMLYSFQTSLPR	13	1	1566.82	ENSMMUP00000002371;ENSMMUP00000019343	ENSMMUP00000002371	yes	no	3	0.016357	68.171	1	1	1	1	1	1	30307000	20614000	2772000	6920700
16283	397	LLGSTIPLCSAQWER	15	0	1729.88	ENSMMUP00000002371;ENSMMUP00000019343	ENSMMUP00000002371	yes	no	2	8.2542e-05	107.74	1	1	1	1	1	1	9540800	3412100	3431700	2697000
22625	397	SFTFVVFK	8	0	973.527	ENSMMUP00000002371;ENSMMUP00000019343	ENSMMUP00000002371	yes	no	2	0.0016401	117.4	3	2	2	3	2	2	12052000	6556700	2663800	2831900
25460	397	TSPDAFVQLALQLAHYK	17	0	1901	ENSMMUP00000002371;ENSMMUP00000019343	ENSMMUP00000002371	yes	no	2,3	1.2303e-05	138.19	6	5	5	6	5	5	36991000	10122000	14758000	12111000
29092	397	YLAVESPFLK	10	0	1165.64	ENSMMUP00000002371;ENSMMUP00000019343	ENSMMUP00000002371	yes	no	2	0.0017759	96.89		1	1		1	1	4947600	0	3625500	1322200
4476	398	DYFEDQPLLYPPGFDGR	17	0	2027.93	ENSMMUP00000002376	ENSMMUP00000002376	yes	yes	2	0.00016334	98.508	2	1	1	2	1	1	8780700	2658800	3433600	2688300
24923	398	TKPVPLHCDIIGDAFWK	17	1	1996.02	ENSMMUP00000002376	ENSMMUP00000002376	yes	yes	4	0.032211	61.265	1			1			982820	982820	0	0
9847	399	GPPLREGEELVMDEEAYVLYHR	22	1	2601.25	ENSMMUP00000002381	ENSMMUP00000002381	yes	yes	3,4	8.6483e-06	101.5	3	4	1	3	4	1	9950500	2519900	6348600	1082000
16455	399	LLQVVEDPQALAAFLR	16	0	1782	ENSMMUP00000002381	ENSMMUP00000002381	yes	yes	2,3	1.6441e-10	162.94	5	2		5	2		7747200	6664900	1082300	0
19484	399	NIHLWTPTDGGSWHVDQR	18	0	2118	ENSMMUP00000002381	ENSMMUP00000002381	yes	yes	3,4	0.00011015	91.355		1	2		1	2	6975600	0	2816900	4158600
19485	399	NIHLWTPTDGGSWHVDQRPFVGHTR	25	1	2912.42	ENSMMUP00000002381	ENSMMUP00000002381	yes	yes	3,4	5.4393e-07	90.729	2	2	2	2	2	2	6617900	2306400	2123100	2188300
27571	399	VSWLGEEPVAGVWSEK	16	0	1771.88	ENSMMUP00000002381	ENSMMUP00000002381	yes	yes	2	1.7726e-10	162.46	3	2	3	3	2	3	33008000	10716000	12233000	10059000
3596	400	DLPDVQELITQVR	13	0	1524.81	ENSMMUP00000002388;ENSMMUP00000002387;ENSMMUP00000002389;ENSMMUP00000034037	ENSMMUP00000002388	yes	no	2	3.2379e-07	136.33	2	2	2	2	2	2	37382000	8923000	16924000	11535000
11864	400	IFLLGLADNEAAIVQAESEETKER	24	1	2645.35	ENSMMUP00000002388;ENSMMUP00000002387;ENSMMUP00000002389;ENSMMUP00000034037	ENSMMUP00000002388	yes	no	3	0.00041414	71.073	2	2	2	2	2	2	76975000	28985000	28398000	19592000
14710	400	LASAFTEEQAVLYNQR	16	0	1838.92	ENSMMUP00000002388;ENSMMUP00000002387;ENSMMUP00000002389	ENSMMUP00000002388	yes	no	2	2.0618e-15	171.81	2	2	1	2	2	1	20430000	7339900	9539500	3550300
15026	400	LEAQAYTAYLSGMLR	15	0	1685.84	ENSMMUP00000002388;ENSMMUP00000002387;ENSMMUP00000002389	ENSMMUP00000002388	yes	no	2	0.044015	50.827	1			1			782750	782750	0	0
22688	400	SGGTEGLLAEKLEALITQTR	20	1	2086.13	ENSMMUP00000002388;ENSMMUP00000002387;ENSMMUP00000034037	ENSMMUP00000002388	yes	no	2,3	3.5796e-08	124.91	1	3	1	1	3	1	44368000	16401000	20333000	7634700
27517	400	VSNLQYLHSYLTYIK	15	0	1840.97	ENSMMUP00000002388;ENSMMUP00000002387;ENSMMUP00000002389;ENSMMUP00000034037	ENSMMUP00000002388	yes	no	2,3	1.261e-05	140.84	1	1	2	1	1	2	29409000	4407500	7187900	17813000
2018	401	ATIGADFLTK	10	0	1035.56	ENSMMUP00000002391	ENSMMUP00000002391	yes	yes	2	0.053435	57.348	1	1		1	1		7203600	2542600	4661000	0
3872	401	DPENFPFVVLGNK	13	0	1474.75	ENSMMUP00000002391	ENSMMUP00000002391	yes	yes	2	2.6453e-24	180.24	3	3	4	3	3	4	530660000	102990000	280430000	147250000
4645	401	EAINVEQAFQTIAR	14	0	1588.82	ENSMMUP00000002391	ENSMMUP00000002391	yes	yes	2,3	7.0165e-184	291.51	7	4	5	7	4	5	506840000	154010000	225320000	127510000
7980	401	FQSLGVAFYR	10	0	1186.61	ENSMMUP00000002391	ENSMMUP00000002391	yes	yes	2	2.0355e-09	159.09	5	6	6	5	6	6	475080000	214130000	176950000	83997000
17847	401	LVTMQIWDTAGQER	14	0	1646.81	ENSMMUP00000002391	ENSMMUP00000002391	yes	yes	2,3	7.4711e-82	244.56	5	5	5	5	5	5	324510000	95264000	138400000	90844000
19081	401	NALKQETEVELYNEFPEPIKLDK	23	2	2746.41	ENSMMUP00000002391	ENSMMUP00000002391	yes	yes	3,4	2.5061e-25	153.82	6	5	5	6	5	5	655250000	292280000	187590000	175390000
20884	401	QETEVELYNEFPEPIK	16	0	1963.94	ENSMMUP00000002391	ENSMMUP00000002391	yes	yes	2	2.2324e-05	139.34		1	1		1	1	6835900	0	2967400	3868500
24953	401	TLDSWRDEFLIQASPR	16	1	1932.97	ENSMMUP00000002391	ENSMMUP00000002391	yes	yes	2,3	7.9349e-53	218.11	7	5	5	7	5	5	668710000	300260000	185040000	183410000
903	402	AHQLPGHLTQEHDAVLSLSAYNVK	24	0	2627.35	ENSMMUP00000002392	ENSMMUP00000002392	yes	yes	4	0.0039829	54.008	1			1			7790000	7790000	0	0
4128	402	DSQHFENFLETIGVK	15	0	1762.85	ENSMMUP00000002392	ENSMMUP00000002392	yes	yes	3	0.00027351	93.478	1			1			3025900	3025900	0	0
17436	402	LSSQEIQQFAALLHEYR	17	0	2032.04	ENSMMUP00000002392	ENSMMUP00000002392	yes	yes	3	0.00031515	91.076	3	2	3	3	2	3	17760000	4194100	7756900	5809500
21450	402	RAHQLPGHLTQEHDAVLSLSAYNVK	25	1	2783.45	ENSMMUP00000002392	ENSMMUP00000002392	yes	yes	5	0.026229	44.953	1			1			1411100	1411100	0	0
2870	403	DFTEGTLFSVNQEFSLIK	18	0	2074.03	ENSMMUP00000002393	ENSMMUP00000002393	yes	yes	2,3	1.2753e-26	186.94	1		2	1		2	5512300	1224200	0	4288200
4817	403	EDILEFIK	8	0	1005.54	ENSMMUP00000002393	ENSMMUP00000002393	yes	yes	2	0.052382	65.246	1			1			369150	369150	0	0
6287	403	EQIEWLIEHK	10	0	1323.68	ENSMMUP00000002393	ENSMMUP00000002393	yes	yes	2,3	0.092543	78.488	1	1	1	1	1	1	4441000	2234800	2206200	0
10067	403	GSLQFEDKWDFMR	13	1	1657.76	ENSMMUP00000002393	ENSMMUP00000002393	yes	yes	3	6.0792e-10	148.18	1	2	1	1	2	1	10099000	3403100	4001000	2694700
12066	403	IHQALKEDILEFIK	14	1	1695.96	ENSMMUP00000002393	ENSMMUP00000002393	yes	yes	2,3,4	7.7284e-52	218.68	6	8	4	6	8	4	106730000	64122000	31332000	11275000
12939	403	ISNAQLQTELVEILK	15	0	1697.96	ENSMMUP00000002393	ENSMMUP00000002393	yes	yes	2	1.553e-30	196.8	1	2	2	1	2	2	13884000	2719300	7063900	4101000
13958	403	KLMLDTWNESIFSNIK	16	1	1937.99	ENSMMUP00000002393	ENSMMUP00000002393	yes	yes	3	8.2599e-07	148.7	2	1	2	2	1	2	22355000	8111400	4405900	9838200
14741	403	LATELPDAELRR	12	1	1382.75	ENSMMUP00000002393	ENSMMUP00000002393	yes	yes	3	0.041905	59.067	1			1			3641700	3641700	0	0
16590	403	LMLDTWNESIFSNIK	15	0	1809.9	ENSMMUP00000002393	ENSMMUP00000002393	yes	yes	2	1.4119e-41	212.39	4	5	5	4	5	5	65824000	13388000	25949000	26487000
18794	403	MREEENEGIVQLR	13	1	1601.78	ENSMMUP00000002393	ENSMMUP00000002393	yes	yes	3	0.093817	59.57		1			1		10102000	0	10102000	0
25112	403	TLWSLVAFPK	10	0	1160.66	ENSMMUP00000002393	ENSMMUP00000002393	yes	yes	2	0.0005916	107.21	2	3	3	2	3	3	14722000	5301700	4079800	5340800
29601	403	YVEQLLTLFNR	11	0	1394.76	ENSMMUP00000002393	ENSMMUP00000002393	yes	yes	2	7.9885e-60	215.08	2	2	3	2	2	3	41739000	10249000	10006000	21484000
5944	405	ELTFDQLQLLK	11	0	1346.74	ENSMMUP00000002408	ENSMMUP00000002408	yes	yes	2	0.00071157	106.29	2	1		2	1		3854500	2190500	1664000	0
7005	405	FDADPVELFEIPVK	14	0	1617.83	ENSMMUP00000002408	ENSMMUP00000002408	yes	yes	2	0.033282	95.981	1			1			147140	147140	0	0
13236	405	IYDWMPEQPNIFQVEQLER	19	0	2434.16	ENSMMUP00000002408;ENSMMUP00000037525	ENSMMUP00000002408	yes	no	3	0.00074662	73.057			1			1	2430700	0	0	2430700
13537	405	KFDADPVELFEIPVK	15	1	1745.92	ENSMMUP00000002408	ENSMMUP00000002408	yes	yes	3	0.00025378	100.4	1		1	1		1	2797000	660640	0	2136400
3926	406	DPTFDTITYEWAPPGVTQK	19	0	2165.03	ENSMMUP00000002416	ENSMMUP00000002416	yes	yes	2,3	1.6722e-53	212.92	6	6	5	6	6	5	367080000	105180000	153150000	108750000
10226	406	GVAPPDSPVVYSDR	14	0	1457.72	ENSMMUP00000002416	ENSMMUP00000002416	yes	yes	2	3.8995e-07	141.37	1	2	1	1	2	1	25834000	8642800	12574000	4616800
10685	406	HFVCEGCEQLLSGR	14	0	1690.76	ENSMMUP00000002416	ENSMMUP00000002416	yes	yes	2	0.0012391	83.729			1			1	256210	0	0	256210
15602	406	LGLQYMELIPK	11	0	1303.72	ENSMMUP00000002416	ENSMMUP00000002416	yes	yes	2	3.4698e-06	145.09	8	8	8	8	8	8	871280000	282910000	349030000	239350000
18494	406	MIMTNPIATGKDPTFDTITYEWAPPGVTQK	30	1	3322.63	ENSMMUP00000002416	ENSMMUP00000002416	yes	yes	3,4	5.9616e-05	65.741	2	3	2	2	3	2	69285000	23768000	37183000	8334700
21109	406	QLMHQLPIYDQDPSR	15	0	1839.89	ENSMMUP00000002416	ENSMMUP00000002416	yes	yes	2,3	2.3638e-15	174.95	7	5	7	7	5	7	337670000	119070000	51577000	167030000
22388	406	SEALGVGEVALPGQGGLPK	19	0	1777.96	ENSMMUP00000002416	ENSMMUP00000002416	yes	yes	2	4.6231e-23	170.09	2	4	3	2	4	3	470480000	118140000	183630000	168720000
22389	406	SEALGVGEVALPGQGGLPKEEGK	23	1	2221.16	ENSMMUP00000002416	ENSMMUP00000002416	yes	yes	2,3	2.749e-26	155.16	2	1	1	2	1	1	84151000	65201000	16018000	2931900
7174	407	FFDANYDGKDYDPVAAR	17	1	1962.87	ENSMMUP00000002417	ENSMMUP00000002417	yes	yes	3	0.0012526	91.076	1	1		1	1		11082000	4003000	7079000	0
7920	407	FQDNFEFVQWFK	12	0	1633.76	ENSMMUP00000002417	ENSMMUP00000002417	yes	yes	2	5.2288e-45	204.85	4	3	5	4	3	5	48893000	16818000	19944000	12132000
9379	407	GKFQDNFEFVQWFK	14	1	1818.87	ENSMMUP00000002417	ENSMMUP00000002417	yes	yes	2,3	5.6579e-11	164.2	2	2	2	2	2	2	7781300	1335800	5262300	1183100
10582	407	HDMLAWINESLQLNLTK	17	0	2025.04	ENSMMUP00000002417	ENSMMUP00000002417	yes	yes	3	1.3025e-10	162.29		1			1		1144000	0	1144000	0
11763	407	IEQLCSGAAYCQFMDMLFPGSIALK	25	0	2849.33	ENSMMUP00000002417	ENSMMUP00000002417	yes	yes	3	0.0026753	55.228		1			1		4183600	0	4183600	0
13559	407	KFFDANYDGKDYDPVAAR	18	2	2090.97	ENSMMUP00000002417	ENSMMUP00000002417	yes	yes	3	0.032526	73.498	1			1			5634400	5634400	0	0
20968	407	QGQETAVAPSLVAPALNKPK	20	1	2018.12	ENSMMUP00000002417	ENSMMUP00000002417	yes	yes	3	0.00074341	78.95	1	1	1	1	1	1	27344000	3776500	7428600	16139000
10935	408	HLNRPTLDDSSEEEHAIEITTQEITQLFHR	30	1	3558.73	ENSMMUP00000002440;ENSMMUP00000002438;ENSMMUP00000002439	ENSMMUP00000002440	yes	no	5	4.0455e-14	96.303	2	1	2	2	1	2	20223000	5466700	9585200	5171100
21849	408	RLTDAFLLLR	10	1	1216.73	ENSMMUP00000002440;ENSMMUP00000002438;ENSMMUP00000002439	ENSMMUP00000002440	yes	no	3	0.0034936	94.309	1	1	1	1	1	1	1059900	287120	474050	298700
6725	409	EVPLLQSLWLAHNEIR	16	0	1917.05	ENSMMUP00000002443	ENSMMUP00000002443	yes	yes	2,3	2.596e-05	138.05	4	3	2	4	3	2	38451000	18841000	13475000	6134900
16841	409	LPGLPEGAFR	10	0	1055.58	ENSMMUP00000002443	ENSMMUP00000002443	yes	yes	2	0.0012975	99.815	1	1		1	1		3643900	1474600	2169200	0
1529	410	ANHSFTPNCIYDMFVHPR	18	0	2204.99	ENSMMUP00000002451	ENSMMUP00000002451	yes	yes	3,4	1.8682e-06	129.01	3	2	2	3	2	2	6492600	1661700	3588700	1242100
14744	410	LATLMSTEEGRPHFELMPGNSVYHFDK	27	1	3105.47	ENSMMUP00000002451	ENSMMUP00000002451	yes	yes	3,4	9.8143e-05	69.981	2	1	1	2	1	1	28181000	19214000	3981100	4986300
22731	410	SGPEAPEWYQVELK	14	0	1631.78	ENSMMUP00000002451	ENSMMUP00000002451	yes	yes	2	2.5599e-11	160.27	3	4	3	3	4	3	52815000	17868000	26390000	8557500
27978	410	VYVAESLISSAGEGLFSK	18	0	1855.96	ENSMMUP00000002451	ENSMMUP00000002451	yes	yes	2	2.1884e-06	113.88		1			1		2873800	0	2873800	0
696	412	AGDLRDTGIFLDLMHLK	17	1	1914	ENSMMUP00000036966;ENSMMUP00000002469	ENSMMUP00000036966	yes	no	3,4	0.0029269	82.59		3			3		5667400	0	5667400	0
3154	412	DIISIAEDEDLR	12	0	1387.68	ENSMMUP00000036966;ENSMMUP00000002469	ENSMMUP00000036966	yes	no	2	1.1266e-35	191.79	4	4	4	4	4	4	187370000	54502000	77236000	55632000
3521	412	DLLAVVFYGTEK	12	0	1353.72	ENSMMUP00000036966;ENSMMUP00000002469	ENSMMUP00000036966	yes	no	2	4.5677e-56	215.72	5	4	5	5	4	5	43891000	13794000	11592000	18505000
3522	412	DLLAVVFYGTEKDK	14	1	1596.84	ENSMMUP00000036966;ENSMMUP00000002469	ENSMMUP00000036966	yes	no	3	0.036941	67.456	1		1	1		1	1649500	853140	0	796400
4196	412	DTGIFLDLMHLK	12	0	1401.73	ENSMMUP00000036966;ENSMMUP00000002469	ENSMMUP00000036966	yes	no	2,3	6.2688e-20	172.13	24	26	17	24	26	17	763560000	273870000	250090000	239600000
5977	412	ELVYPPDYNPEGK	13	0	1519.72	ENSMMUP00000036966;ENSMMUP00000002469	ENSMMUP00000036966	yes	no	2	0.00039316	105.65	2	1	2	2	1	2	1766700	1755700	10974	0
7013	412	FDDPGLMLMGFK	12	0	1369.64	ENSMMUP00000036966;ENSMMUP00000002469;ENSMMUP00000019822	ENSMMUP00000036966	yes	no	2	2.2652e-21	179.19	3	4	5	3	4	5	184530000	37538000	43897000	103090000
7014	412	FDDPGLMLMGFKPLVLLK	18	1	2033.11	ENSMMUP00000036966;ENSMMUP00000002469	ENSMMUP00000036966	yes	no	2,3,4	7.8083e-07	142.85	11	5	4	11	5	4	150740000	108180000	35026000	7540800
8220	412	FTVPMLK	7	0	834.467	ENSMMUP00000036966;ENSMMUP00000002469	ENSMMUP00000036966	yes	no	2	0.0091723	95.62	3	3	3	3	3	3	43586000	14022000	18172000	11393000
12195	412	IISSDRDLLAVVFYGTEK	18	1	2025.08	ENSMMUP00000036966;ENSMMUP00000002469	ENSMMUP00000036966	yes	no	2,3	5.704e-06	131.25	6	6	5	6	6	5	300610000	98267000	119600000	82740000
12196	412	IISSDRDLLAVVFYGTEKDK	20	2	2268.2	ENSMMUP00000036966;ENSMMUP00000002469	ENSMMUP00000036966	yes	no	3	0.00082304	97.271	1	1	1	1	1	1	22348000	12363000	8194000	1791000
12325	412	ILELDQFK	8	0	1004.55	ENSMMUP00000036966;ENSMMUP00000002469;ENSMMUP00000019822	ENSMMUP00000036966	yes	no	2	4.2605e-10	170.24	2	2	2	2	2	2	61151000	23455000	28825000	8871000
12789	412	IQVTPPGFQLVFLPFADDK	19	0	2131.14	ENSMMUP00000036966;ENSMMUP00000002469	ENSMMUP00000036966	yes	no	2,3	1.864e-52	210.12	12	9	17	12	9	17	664760000	145520000	240850000	278400000
12790	412	IQVTPPGFQLVFLPFADDKR	20	1	2287.24	ENSMMUP00000036966;ENSMMUP00000002469	ENSMMUP00000036966	yes	no	2,3,4	1.2877e-13	148.85	14	9	10	14	9	10	448570000	98889000	154370000	195310000
12791	412	IQVTPPGFQLVFLPFADDKRK	21	2	2415.33	ENSMMUP00000036966;ENSMMUP00000002469	ENSMMUP00000036966	yes	no	4	0.00029129	105.89		1			1		1326800	0	1326800	0
14144	412	KPGGFDISLFYR	12	1	1398.73	ENSMMUP00000036966;ENSMMUP00000002469	ENSMMUP00000036966	yes	no	2,3	1.1155e-09	154.36	13	8	10	13	8	10	593770000	285600000	210490000	97682000
15666	412	LGSLVDEFK	9	0	1006.53	ENSMMUP00000036966;ENSMMUP00000002469	ENSMMUP00000036966	yes	no	2	2.3403e-05	153.05	2	3	3	2	3	3	29030000	7955900	11811000	9263700
15667	412	LGSLVDEFKELVYPPDYNPEGK	22	1	2508.24	ENSMMUP00000036966;ENSMMUP00000002469	ENSMMUP00000036966	yes	no	2,3	6.5645e-08	114.46	5	4		5	4		143840000	61251000	82589000	0
19522	412	NIPPYFVALVPQDEELDDQK	20	0	2329.15	ENSMMUP00000036966;ENSMMUP00000002469	ENSMMUP00000036966	yes	no	2,3	7.194e-07	114.29	5	6	7	5	6	7	235030000	56163000	99215000	79650000
19540	412	NIYVLQELDNPGAK	14	0	1572.81	ENSMMUP00000036966;ENSMMUP00000002469	ENSMMUP00000036966	yes	no	2	9.0383e-23	188.12	3	2	2	3	2	2	271730000	40121000	126930000	104680000
19605	412	NLEALALDLMEPEQAVDLTLPK	22	0	2422.27	ENSMMUP00000036966;ENSMMUP00000002469	ENSMMUP00000036966	yes	no	2,3,4	2.0765e-81	216.38	49	46	39	49	46	39	2498300000	681730000	1075100000	741410000
20480	412	PGGFDISLFYR	11	0	1270.63	ENSMMUP00000036966;ENSMMUP00000002469	ENSMMUP00000036966	yes	no	2	0.0028353	90.653		1	2		1	2	2201700	0	544010	1657700
21554	412	RFDDPGLMLMGFK	13	1	1525.74	ENSMMUP00000036966;ENSMMUP00000002469	ENSMMUP00000036966	yes	no	2,3	6.6353e-14	160.15	2	1	2	2	1	2	3920800	1499400	173870	2247500
21810	412	RLGSLVDEFKELVYPPDYNPEGK	23	2	2664.34	ENSMMUP00000036966;ENSMMUP00000002469	ENSMMUP00000036966	yes	no	4	0.018212	62.19		1			1		4315300	0	4315300	0
21885	412	RNIPPYFVALVPQDEELDDQK	21	1	2485.25	ENSMMUP00000036966;ENSMMUP00000002469	ENSMMUP00000036966	yes	no	2,3	4.0124e-07	115.73		1	2		1	2	30398000	0	4047700	26351000
22368	412	SDSFENPVLQQHFR	14	0	1702.81	ENSMMUP00000036966;ENSMMUP00000002469	ENSMMUP00000036966	yes	no	2,3	3.1151e-52	215.34	14	10	10	14	10	10	2434400000	1190000000	448070000	796340000
24644	412	TFNTSTGGLLLPSDTK	16	0	1650.85	ENSMMUP00000036966;ENSMMUP00000002469	ENSMMUP00000036966	yes	no	2	0.00017077	101.67	1	1	1	1	1	1	57535000	0	34615000	22920000
24645	412	TFNTSTGGLLLPSDTKR	17	1	1806.95	ENSMMUP00000036966;ENSMMUP00000002469	ENSMMUP00000036966	yes	no	2,3	4.6113e-05	124.68	4	3	3	4	3	3	31885000	14934000	8795600	8155900
26497	412	VHFEESSKLEDLLR	14	1	1700.87	ENSMMUP00000036966;ENSMMUP00000002469;ENSMMUP00000019822	ENSMMUP00000036966	yes	no	2,3,4	1.3814e-40	211.51	9	7	4	9	7	4	647290000	161320000	266300000	219670000
8837	413	GFAFVTFDDHDTVDK	15	0	1712.77	ENSMMUP00000002473;ENSMMUP00000002475;ENSMMUP00000037987	ENSMMUP00000002473	yes	no	2,3	3.2308e-31	201.06	19	14	19	19	14	19	2145100000	580010000	644810000	920270000
8838	413	GFAFVTFDDHDTVDKIVVQK	20	1	2280.14	ENSMMUP00000002473;ENSMMUP00000002475;ENSMMUP00000037987	ENSMMUP00000002473	yes	no	2,3,4	3.3898e-13	148.36	6	5	3	6	5	3	908740000	418820000	441340000	48579000
8918	413	GFGFVTYSCVEEVDAAMCARPHK	23	1	2630.17	ENSMMUP00000002473;ENSMMUP00000002475	ENSMMUP00000002473	yes	no	3,4	3.3511e-08	113.29	2	1		2	1		24212000	18709000	5502800	0
11786	413	IETIEVMEDR	10	0	1233.59	ENSMMUP00000002473;ENSMMUP00000002475;ENSMMUP00000037987	ENSMMUP00000002473	yes	no	2	9.4403e-07	153.12	2	2	1	2	2	1	46568000	9903300	17322000	19343000
11901	413	IFVGGIKEDTEEYNLR	16	1	1881.95	ENSMMUP00000002473;ENSMMUP00000002475;ENSMMUP00000037987	ENSMMUP00000002473	yes	no	2,3	7.8435e-22	186.05	12	12	11	12	12	11	3463100000	1459300000	1254700000	749120000
11902	413	IFVGGIKEDTEEYNLRDYFEK	21	2	2564.24	ENSMMUP00000002473;ENSMMUP00000002475;ENSMMUP00000037987	ENSMMUP00000002473	yes	no	3	0.026134	66.893	1	1		1	1		11404000	5681400	5723100	0
13767	413	KIFVGGIKEDTEEYNLR	17	2	2010.04	ENSMMUP00000002473;ENSMMUP00000002475;ENSMMUP00000037987	ENSMMUP00000002473	yes	no	2,3	2.8074e-15	176.28	2	2	3	2	2	3	437640000	106720000	41436000	289480000
13919	413	KLFIGGLSFETTDDSLR	17	1	1897.98	ENSMMUP00000002473;ENSMMUP00000002475	ENSMMUP00000002473	yes	no	2,3	3.4268e-07	147.17	6	4	5	6	4	5	444570000	151650000	128540000	164380000
13920	413	KLFIGGLSFETTDDSLREHFEK	22	2	2568.29	ENSMMUP00000002473;ENSMMUP00000002475	ENSMMUP00000002473	yes	no	2,3,4	8.5193e-36	173.21	7	6	8	7	6	8	747150000	359130000	297210000	90808000
15329	413	LFIGGLSFETTDDSLR	16	0	1769.88	ENSMMUP00000002473;ENSMMUP00000002475	ENSMMUP00000002473	yes	no	2	5.6259e-31	196.8	6	7	9	6	7	9	484810000	102260000	168870000	213680000
15330	413	LFIGGLSFETTDDSLREHFEK	21	1	2440.19	ENSMMUP00000002473;ENSMMUP00000002475	ENSMMUP00000002473	yes	no	2,3,4	1.733e-29	177.6	6	7	11	6	7	11	1244500000	544240000	343010000	357230000
21624	413	RGFAFVTFDDHDTVDK	16	1	1868.87	ENSMMUP00000002473;ENSMMUP00000002475;ENSMMUP00000037987	ENSMMUP00000002473	yes	no	2,3,4	2.1725e-15	174.62	5	7	4	5	7	4	465970000	108470000	202010000	155490000
21625	413	RGFAFVTFDDHDTVDKIVVQK	21	2	2436.24	ENSMMUP00000002473;ENSMMUP00000002475;ENSMMUP00000037987	ENSMMUP00000002473	yes	no	3,4	0.00037985	93.753	3	2	1	3	2	1	71825000	38040000	28761000	5023300
28182	413	WGTLTDCVVMR	11	0	1336.63	ENSMMUP00000002473;ENSMMUP00000002475	ENSMMUP00000002473	yes	no	2	1.0289e-05	141.1	5	5	4	5	5	4	364690000	149270000	139510000	75906000
28183	413	WGTLTDCVVMRDPQTK	16	1	1905.91	ENSMMUP00000002473;ENSMMUP00000002475	ENSMMUP00000002473	yes	no	2,3	0.00010166	138.19	5	3		5	3		48927000	22843000	26084000	0
28903	413	YGKIETIEVMEDR	13	1	1581.77	ENSMMUP00000002473;ENSMMUP00000002475;ENSMMUP00000037987	ENSMMUP00000002473	yes	no	2,3	0.0017176	104.55	3	2		3	2		62696000	58153000	4542500	0
2481	415	DAFCVFEHNQGLPLR	15	0	1801.86	ENSMMUP00000002488	ENSMMUP00000002488	yes	yes	2,3	4.8934e-15	169.4	7	3	8	7	3	8	241580000	120160000	42242000	79175000
2482	415	DAFCVFEHNQGLPLRR	16	1	1957.96	ENSMMUP00000002488	ENSMMUP00000002488	yes	yes	2,3,4	0.0011381	86.944	4	3	1	4	3	1	273260000	100970000	126750000	45535000
4652	415	EALAIVFFGR	10	0	1121.62	ENSMMUP00000002488	ENSMMUP00000002488	yes	yes	2	1.088e-65	234.71	10	8	9	10	8	9	100280000	39599000	34638000	26040000
4988	415	EELTAVMHFLTQR	13	0	1573.79	ENSMMUP00000002488	ENSMMUP00000002488	yes	yes	2,3	9.5133e-42	202.29	13	10	12	13	10	12	468400000	148330000	120350000	199720000
5882	415	ELPQASGLLHHCCFYK	16	0	1958.91	ENSMMUP00000002488	ENSMMUP00000002488	yes	yes	2,3,4	3.1543e-22	183	3	3	2	3	3	2	221620000	132960000	36318000	52343000
6846	415	EYLDIDQMIFDR	12	0	1556.72	ENSMMUP00000002488	ENSMMUP00000002488	yes	yes	2	3.9718e-100	250.69	5	7	3	5	7	3	757500000	237740000	248090000	271670000
10785	415	HHSDLYSHYFGGLAETVLVVR	21	0	2399.2	ENSMMUP00000002488	ENSMMUP00000002488	yes	yes	4	0.0010703	66.809	1	1	2	1	1	2	3394100	93547	1947900	1352600
20736	415	PYNFFDEDPSFYSADSIHFR	20	0	2453.06	ENSMMUP00000002488	ENSMMUP00000002488	yes	yes	2,3	1.0302e-41	195.62	1		3	1		3	50304000	18802000	0	31502000
23637	415	SPVPPGPAPPLQFHPQGPR	19	0	1975.04	ENSMMUP00000002488	ENSMMUP00000002488	yes	yes	2,3	1.5088e-05	99.451	4	3	6	4	3	6	492200000	95027000	222580000	174600000
11997	416	IGPQHQAGSDSLLTGMAFFK	20	0	2104.04	ENSMMUP00000002495;ENSMMUP00000002496	ENSMMUP00000002495	yes	no	2,3	1.1186e-10	134.32	4	2	4	4	2	4	80790000	34580000	20890000	25319000
12447	416	ILTNSNLPEEELDFFEILR	19	0	2291.17	ENSMMUP00000002495;ENSMMUP00000002496	ENSMMUP00000002495	yes	no	2,3	2.8678e-53	212.72	4	3	3	4	3	3	18550000	5471900	5867000	7210800
15300	416	LFFPVIYDVK	10	0	1239.69	ENSMMUP00000002495;ENSMMUP00000002496	ENSMMUP00000002495	yes	no	2	5.6377e-10	166.34	2	2	2	2	2	2	17506000	7259200	5908800	4338400
14277	417	KSISHYHETLGEALQGVELEFSGLDIK	27	1	2999.52	ENSMMUP00000002497	ENSMMUP00000002497	yes	yes	3,4,5	1.2192e-05	77.576	2	2		2	2		9390400	1667600	7722800	0
22950	417	SISHYHETLGEALQGVELEFSGLDIK	26	0	2871.43	ENSMMUP00000002497	ENSMMUP00000002497	yes	yes	2,3,4	4.1543e-91	206.34	6	6	7	6	6	7	92204000	17819000	55131000	19253000
28834	417	YFSLPFCVGSK	11	0	1303.63	ENSMMUP00000002497	ENSMMUP00000002497	yes	yes	2	0.0043931	84.658	1	2	2	1	2	2	16474000	4080000	7851300	4543200
29500	417	YSKEEEMDDMDRDLGDEYGWK	21	2	2610.05	ENSMMUP00000002497	ENSMMUP00000002497	yes	yes	3,4	2.63e-05	113.47	3	1	2	3	1	2	39665000	18240000	8896200	12529000
2759	418	DFEVGQPFPLR	11	0	1303.66	ENSMMUP00000002506	ENSMMUP00000002506	yes	yes	2	0.12315	68.536		1			1		1069600	0	1069600	0
6441	418	ESIQLYDAMFQIWK	14	0	1770.87	ENSMMUP00000002506	ENSMMUP00000002506	yes	yes	2	9.2454e-06	131.35	1		1	1		1	263930	165290	0	98646
9900	418	GQDLMGDVYFFDIPFPK	17	0	1987.94	ENSMMUP00000002506	ENSMMUP00000002506	yes	yes	2	1.7332e-05	135.28	1	1	1	1	1	1	6000900	2194400	1698800	2107600
10566	418	HDDIHFDHFHPCAALTTDHIER	22	0	2683.2	ENSMMUP00000002506	ENSMMUP00000002506	yes	yes	5	0.15104	29.311	1			1			1290500	1290500	0	0
6185	419	EPDVLILDEPTNNLDIESIDALGEAINEYK	30	0	3341.64	ENSMMUP00000002513;ENSMMUP00000002510	ENSMMUP00000002513	yes	no	3	1.0953e-14	95.794			1			1	3203800	0	0	3203800
11949	419	IGFFNQQYAEQLR	13	0	1612.8	ENSMMUP00000002513;ENSMMUP00000002510	ENSMMUP00000002513	yes	no	2	8.8978e-82	241.15	2	5	3	2	5	3	63362000	21244000	26965000	15153000
12267	419	ILAGLGFDPEMQNRPTQK	18	1	2014.03	ENSMMUP00000002513;ENSMMUP00000002510	ENSMMUP00000002513	yes	no	3	0.00128	83.692	1			1			15154000	15154000	0	0
24001	419	STLLLLLTGK	10	0	1057.67	ENSMMUP00000002513;ENSMMUP00000002510	ENSMMUP00000002513	yes	no	2	2.0082e-30	201.84	6	6	5	6	6	5	18125000	8372000	5000300	4752400
2219	421	AVQALCAVYEHWVPR	15	0	1797.9	ENSMMUP00000002518	ENSMMUP00000002518	yes	yes	2,3	1.9999e-10	163.99	3	3	2	3	3	2	50685000	23771000	14687000	12227000
6290	421	EQIVVDLSHPGVSEDDQVSR	20	0	2208.07	ENSMMUP00000002518	ENSMMUP00000002518	yes	yes	3	0.0020334	64.507		1			1		7052200	0	7052200	0
11463	421	IAILGFAFK	9	0	978.59	ENSMMUP00000002518	ENSMMUP00000002518	yes	yes	2	0.00064059	130.27	3	3	4	3	3	4	37980000	13581000	12157000	12242000
11823	421	IFDANTKPNLNLQVLSNPEFLAEGTAINDLK	31	1	3398.77	ENSMMUP00000002518	ENSMMUP00000002518	yes	yes	3,4	1.8883e-15	92.258	2	2	3	2	2	3	30070000	6566900	10553000	12950000
11824	421	IFDANTKPNLNLQVLSNPEFLAEGTAINDLKYPDR	35	2	3930.02	ENSMMUP00000002518	ENSMMUP00000002518	yes	yes	3,4	2.1289e-10	76.002	3	3	1	3	3	1	204290000	88626000	93828000	21839000
12116	421	IIDSLFNTVTDKK	13	1	1492.81	ENSMMUP00000002518	ENSMMUP00000002518	yes	yes	3	0.02632	64.121	1	1	1	1	1	1	29017000	23060000	3924000	2032800
12451	421	ILTTNTWSSELSK	13	0	1478.76	ENSMMUP00000002518	ENSMMUP00000002518	yes	yes	2	0.00082849	96.866	1	1	1	1	1	1	21362000	4826000	7824200	8711800
12527	421	INAWNSPTLPIYEPGLK	17	0	1912.01	ENSMMUP00000002518	ENSMMUP00000002518	yes	yes	2	1.0673e-16	176.49	2	3	3	2	3	3	108610000	22370000	51974000	34263000
18581	421	MLKPAFIFDGR	11	1	1293.69	ENSMMUP00000002518	ENSMMUP00000002518	yes	yes	2,3	0.0012557	115.78	3	3	1	3	3	1	56310000	17761000	25418000	13130000
19628	421	NLFFSTNIDDAIKEADLVFISVNTPTK	27	1	3011.55	ENSMMUP00000002518	ENSMMUP00000002518	yes	yes	2,3	0.013079	47.796	2	2	1	2	2	1	145500000	87722000	49396000	8380200
26744	421	VLDGLHNELQTIGFQIETIGK	21	0	2324.24	ENSMMUP00000002518	ENSMMUP00000002518	yes	yes	2,3	6.2549e-48	196.89	3	4	3	3	4	3	152320000	49591000	47663000	55064000
26745	421	VLDGLHNELQTIGFQIETIGKK	22	1	2452.33	ENSMMUP00000002518	ENSMMUP00000002518	yes	yes	4	0.0055941	57.482	2	2	1	2	2	1	34259000	15606000	10601000	8051500
29158	421	YLMDEGAHLHIYDPK	15	0	1800.85	ENSMMUP00000002518	ENSMMUP00000002518	yes	yes	2,3,4	3.8616e-05	126.48	5	2	3	5	2	3	131320000	43427000	31973000	55922000
29671	421	YWQQVIDMNDYQR	13	0	1757.78	ENSMMUP00000002518	ENSMMUP00000002518	yes	yes	2	1.0533e-32	199.31	6	5	5	6	5	5	170130000	63666000	59664000	46798000
6586	422	ETPLPIDPSMFPTWPAK	17	0	1925.96	ENSMMUP00000002520;ENSMMUP00000002519;ENSMMUP00000040678;ENSMMUP00000040679;ENSMMUP00000002523;ENSMMUP00000040681;ENSMMUP00000040680;ENSMMUP00000002521	ENSMMUP00000002520	yes	no	2	1.4738e-05	136.39	3	3	1	3	3	1	41537000	11389000	24162000	5986500
7246	422	FGALLSDQGFDLMNK	15	0	1654.8	ENSMMUP00000002520;ENSMMUP00000002519;ENSMMUP00000040678;ENSMMUP00000040679;ENSMMUP00000002523;ENSMMUP00000040681;ENSMMUP00000040680;ENSMMUP00000002521	ENSMMUP00000002520	yes	no	2	8.7898e-11	166.86			1			1	4719500	0	0	4719500
7695	422	FLTYFPGR	8	0	999.518	ENSMMUP00000002520;ENSMMUP00000002519;ENSMMUP00000040678;ENSMMUP00000040679;ENSMMUP00000002523;ENSMMUP00000040681;ENSMMUP00000040680;ENSMMUP00000002521	ENSMMUP00000002520	yes	no	2	0.011227	87.323	1			1			1939100	1939100	0	0
13217	422	IWPGYNELPAVK	12	0	1385.73	ENSMMUP00000002520;ENSMMUP00000002519;ENSMMUP00000040678;ENSMMUP00000040679;ENSMMUP00000002523;ENSMMUP00000040681;ENSMMUP00000040680	ENSMMUP00000002520	yes	no	2	0.017486	64.55	2	1		2	1		9065500	4957600	4107900	0
18897	422	MTFSEYPYNNLR	12	0	1533.69	ENSMMUP00000002520;ENSMMUP00000002519;ENSMMUP00000040678;ENSMMUP00000040679;ENSMMUP00000002523;ENSMMUP00000040681;ENSMMUP00000040680;ENSMMUP00000002521	ENSMMUP00000002520	yes	no	2	0.00035227	109.24	2	1	1	2	1	1	18839000	8053300	7492100	3293100
25033	422	TLMIQLLR	8	0	986.595	ENSMMUP00000002520;ENSMMUP00000002519;ENSMMUP00000040678;ENSMMUP00000040679;ENSMMUP00000002523;ENSMMUP00000040681;ENSMMUP00000040680	ENSMMUP00000002520	no	no	2	0.052382	65.246	2	2	1				5372100	1299800	2482000	1590200
19743	423	NLSCIVNEGKK	11	1	1260.65	ENSMMUP00000002522;ENSMMUP00000002524;ENSMMUP00000002529	ENSMMUP00000002522	yes	no	2	0.050165	58.676	1	1		1	1		6926100	2109800	4816300	0
23834	423	SSFTVQDLKPFTEYVFR	17	1	2063.04	ENSMMUP00000002522;ENSMMUP00000002524;ENSMMUP00000002529;ENSMMUP00000002528	ENSMMUP00000002522	yes	no	2,3	0.0001166	125.73	2	2	3	2	2	3	28997000	7123500	17335000	4538500
242	424	ACADATLSQITNNIDPVGR	19	0	2014.97	ENSMMUP00000002526	ENSMMUP00000002526	yes	yes	2	4.2263e-52	206.21	1	1	1	1	1	1	48597000	10689000	20164000	17745000
361	424	ADQELMTYSHDNIICGITSVSFSK	24	0	2715.25	ENSMMUP00000002526;ENSMMUP00000040671	ENSMMUP00000002526	yes	no	2,3	3.6625e-39	159.14	5	4	4	5	4	4	160990000	54204000	61978000	44809000
13303	424	KACADATLSQITNNIDPVGR	20	1	2143.07	ENSMMUP00000002526	ENSMMUP00000002526	yes	yes	2	1.444e-32	189.82	1	2	1	1	2	1	30490000	2774800	25532000	2183800
16323	424	LLLAGYDDFNCNVWDALK	18	0	2126.01	ENSMMUP00000002526;ENSMMUP00000040671	ENSMMUP00000002526	yes	no	2,3	6.1463e-129	259.08	7	4	7	7	4	7	385310000	154290000	124850000	106160000
22445	424	SELDQLRQEAEQLK	14	1	1685.86	ENSMMUP00000002526;ENSMMUP00000040670	ENSMMUP00000002526	yes	no	2	1.0074e-21	186.05	3	3	2	3	3	2	776380000	224410000	372010000	179960000
22446	424	SELDQLRQEAEQLKNQIR	18	2	2197.15	ENSMMUP00000002526;ENSMMUP00000040670	ENSMMUP00000002526	yes	no	3	3.7178e-17	169.92	5	6		5	6		154870000	48024000	106840000	0
27434	424	VSCLGVTDDGMAVATGSWDSFLK	23	0	2415.11	ENSMMUP00000002526;ENSMMUP00000040671	ENSMMUP00000002526	yes	no	2,3	4.2367e-47	186.13	9	9	11	9	9	11	309330000	100380000	114040000	94916000
12868	425	ISFSNIISDMK	11	0	1253.63	ENSMMUP00000002535	ENSMMUP00000002535	yes	yes	2	1.5177e-05	138.24	3	4	2	3	4	2	30570000	10753000	15902000	3915300
15749	425	LHIFDMTAVTK	11	0	1274.67	ENSMMUP00000002535	ENSMMUP00000002535	yes	yes	3	0.00085451	103.26	1			1			3256100	3256100	0	0
21811	425	RLHIFDMTAVTK	12	1	1430.77	ENSMMUP00000002535	ENSMMUP00000002535	yes	yes	3	0.0007103	105.95		1	1		1	1	10512000	0	1306000	9205700
23781	425	SRPEHQIQFDDGYDSSPDQQTTDLR	25	1	2934.3	ENSMMUP00000002535	ENSMMUP00000002535	yes	yes	4	4.5747e-11	102.45	2	1	1	2	1	1	113260000	93397000	7290700	12576000
24578	425	TEPLSPELVAAASAVADSLPFDK	23	0	2327.19	ENSMMUP00000002535	ENSMMUP00000002535	yes	yes	2,3	1.272e-31	160.67	4	7	6	4	7	6	75610000	8685100	39691000	27234000
2784	426	DFINFISDK	9	0	1097.54	ENSMMUP00000002540	ENSMMUP00000002540	yes	yes	2	0.0010351	119.53	3	3	3	3	3	3	13261000	3802800	5847200	3610500
2785	426	DFINFISDKEWK	12	1	1540.76	ENSMMUP00000002540	ENSMMUP00000002540	yes	yes	2,3	1.0261e-55	219.42	6	7	6	6	7	6	185120000	86423000	55642000	43057000
7429	426	FIITALPTIYHCK	13	0	1575.85	ENSMMUP00000002540	ENSMMUP00000002540	yes	yes	2,3	4.3672e-05	121.04	3	1	2	3	1	2	23963000	16802000	3106300	4054900
13404	426	KDFINFISDKEWK	13	2	1668.85	ENSMMUP00000002540	ENSMMUP00000002540	yes	yes	2,3,4	1.5028e-80	242.79	2	3	3	2	3	3	27058000	2574700	3348900	21134000
1874	427	ASIQDIWYHEDQIR	14	0	1772.85	ENSMMUP00000002555	ENSMMUP00000002555	yes	yes	2,3	4.2247e-17	179.56	4	4	3	4	4	3	63268000	24733000	25669000	12866000
5615	427	EKPLWLDIYNAFPPLR	16	1	1971.06	ENSMMUP00000002555	ENSMMUP00000002555	yes	yes	3	0.082805	55.885	1			1			114010	114010	0	0
0	430	AAAAAAGAASGLPGPVAQGLK	21	0	1747.96	ENSMMUP00000002566	ENSMMUP00000002566	yes	yes	2	2.2762e-18	149.57	1	1	1	1	1	1	23538000	5953300	10290000	7295000
4688	430	EALVDTLTGILSPVQEVR	18	0	1939.06	ENSMMUP00000002566	ENSMMUP00000002566	yes	yes	2,3	1.5997e-35	192.46	2	3	3	2	3	3	25870000	3852800	13848000	8169700
5750	430	ELGENLDQILR	11	0	1298.68	ENSMMUP00000002566	ENSMMUP00000002566	yes	yes	2	0.0023267	93.096	1	2		1	2		4930700	1886900	3043800	0
12587	430	IPAGLCATAIDILTTVVR	18	0	1883.06	ENSMMUP00000002566	ENSMMUP00000002566	yes	yes	3	0.00012757	90.725	1			1			494520	494520	0	0
15889	430	LIINELSNVMEANAAR	16	0	1756.91	ENSMMUP00000002566	ENSMMUP00000002566	yes	yes	2	0.00012108	105.53			1			1	2625300	0	0	2625300
28481	430	WTNIPLLVK	9	0	1082.65	ENSMMUP00000002566	ENSMMUP00000002566	yes	yes	2	0.010371	80.755	1			1			1737800	1737800	0	0
29508	430	YSNDPVVASLAQDIFK	16	0	1765.89	ENSMMUP00000002566	ENSMMUP00000002566	yes	yes	2,3	3.166e-07	152.37	2	1	1	2	1	1	6740300	2073500	4140900	525840
412	431	AEEEAAPSIFDEPLER	16	0	1801.84	ENSMMUP00000002571	ENSMMUP00000002571	yes	yes	2	2.3002e-07	153.94	2	2	3	2	2	3	44196000	21409000	13303000	9483600
1295	431	ALLQNNTLTELR	12	0	1384.77	ENSMMUP00000002571	ENSMMUP00000002571	yes	yes	2	5.2452e-07	142.97	1	1	1	1	1	1	24817000	5265100	11032000	8519600
9281	431	GILAIFR	7	0	788.491	ENSMMUP00000002571	ENSMMUP00000002571	yes	yes	2	0.0058644	110.54	4	2	2	4	2	2	17325000	7876800	6918900	2529000
13643	431	KGGAPAAPPPPPPPLAPPLIMENLK	25	1	2469.38	ENSMMUP00000002571	ENSMMUP00000002571	yes	yes	3	3.3627e-27	139.44	3	4	2	3	4	2	57013000	19337000	35094000	2582000
15707	431	LGYHFELAGPR	11	0	1258.65	ENSMMUP00000002571	ENSMMUP00000002571	yes	yes	3	2.4863e-05	135.55	2	2	2	2	2	2	69668000	42706000	12487000	14475000
570	433	AFFPCFDTPAVK	12	0	1398.66	ENSMMUP00000002575;ENSMMUP00000038073	ENSMMUP00000002575	yes	no	2	0.00051939	103.43	1			1			4877000	4877000	0	0
947	433	AIEAVAISPWK	11	0	1183.66	ENSMMUP00000002575;ENSMMUP00000038073	ENSMMUP00000002575	yes	no	2	0.0001153	127.87	2	1	2	2	1	2	13272000	7613200	5659200	0
5034	433	EEYNGVIEEFLATGEK	16	0	1826.86	ENSMMUP00000002575;ENSMMUP00000038073	ENSMMUP00000002575	yes	no	2	4.6296e-05	131.4	3	2	2	3	2	2	15945000	6075100	5147100	4723000
6536	433	ETFASTASQLHSNVVNYVQQIVAPK	25	0	2730.4	ENSMMUP00000002575;ENSMMUP00000038073	ENSMMUP00000002575	yes	no	3	4.1704e-07	88.176	2	1	1	2	1	1	20711000	15834000	2077000	2799800
15315	433	LFGPYVWGR	9	0	1093.57	ENSMMUP00000002575;ENSMMUP00000038073	ENSMMUP00000002575	yes	no	2	3.5943e-06	157.34	3	2	1	3	2	1	13689000	6807200	3779300	3102500
22084	433	RVDIIPGFEFDR	12	1	1462.76	ENSMMUP00000002575;ENSMMUP00000038073	ENSMMUP00000002575	yes	no	2,3	0.00072413	105.65	2	2	3	2	2	3	32161000	18348000	9631100	4182400
25734	433	TYQLVYFLDK	10	0	1288.67	ENSMMUP00000002575;ENSMMUP00000038073	ENSMMUP00000002575	yes	no	2	7.1616e-05	130.1		1			1		1223900	0	1223900	0
25993	433	VDIIPGFEFDR	11	0	1306.66	ENSMMUP00000002575;ENSMMUP00000038073	ENSMMUP00000002575	yes	no	2	0.0023028	93.258	4	6	6	4	6	6	74711000	24951000	28839000	20922000
26382	433	VGEGPGVCWLAPEQTAGK	18	0	1854.89	ENSMMUP00000002575	ENSMMUP00000002575	yes	yes	2	1.1173e-05	108.77		1	1		1	1	10766000	0	5403200	5362600
29562	433	YTLPLYHAMMGGSEVAQTLAK	21	0	2280.13	ENSMMUP00000002575;ENSMMUP00000038073	ENSMMUP00000002575	yes	no	3	2.692e-05	86.453	1	1	1	1	1	1	29510000	9037700	10081000	10391000
1551	434	ANPQVGVAFPHIK	13	0	1376.76	ENSMMUP00000002581	ENSMMUP00000002581	yes	yes	2,3	3.839e-19	178.67	8	8	6	8	8	6	279390000	224210000	40486000	14698000
3323	434	DKPSGDTAAVFEEGGDVDDLLDMI	24	1	2508.12	ENSMMUP00000002581	ENSMMUP00000002581	yes	yes	2,3	7.0757e-39	167.63	8	10	11	8	10	11	366560000	73779000	194270000	98508000
4006	434	DQVTAQDIFQDNHEDGPTAK	20	0	2228	ENSMMUP00000002581	ENSMMUP00000002581	yes	yes	2,3	4.3039e-98	238.19	3	3	4	3	3	4	96661000	16294000	29777000	50590000
6216	434	EPLPPIQQHIWNMLNPPAEVTTK	23	0	2652.37	ENSMMUP00000002581	ENSMMUP00000002581	yes	yes	2,3,4	2.9034e-21	146.97	9	15	10	9	15	10	2311000000	427360000	1126400000	757280000
7211	434	FFMGNQVLK	9	0	1082.56	ENSMMUP00000002581	ENSMMUP00000002581	yes	yes	2	0.00071791	127.56	3	3	3	3	3	3	60897000	13788000	13597000	33513000
11051	434	HNYECLVYVQLPFMEDLR	18	0	2325.09	ENSMMUP00000002581	ENSMMUP00000002581	yes	yes	2,3	3.1326e-13	161.51	6	5	5	6	5	5	41459000	13242000	20743000	7474000
12254	434	IKTLFPLIEAK	11	1	1271.79	ENSMMUP00000002581	ENSMMUP00000002581	yes	yes	3	0.01885	83.314		1			1		1287900	0	1287900	0
13399	434	KDEKTDTLEDLFPTTK	16	2	1879.94	ENSMMUP00000002581	ENSMMUP00000002581	yes	yes	2,3	9.0738e-21	181.72	2	3		2	3		102600000	42429000	60168000	0
14460	434	KYAPTEAQLNAVDALIDSMSLAK	23	1	2448.26	ENSMMUP00000002581	ENSMMUP00000002581	yes	yes	2,3	1.4277e-31	163.15	17	22	15	17	22	15	1057600000	372680000	431560000	253370000
16069	434	LKTEQGGAHFSVSSLAEGSVTSVGSVNPAENFR	33	1	3361.65	ENSMMUP00000002581	ENSMMUP00000002581	yes	yes	4	4.5022e-06	62.57	2			2			29119000	29119000	0	0
24490	434	TDTLEDLFPTTK	12	0	1379.68	ENSMMUP00000002581	ENSMMUP00000002581	yes	yes	2	2.4643e-20	169.89	4	4	4	4	4	4	283660000	66087000	132860000	84704000
24582	434	TEQGGAHFSVSSLAEGSVTSVGSVNPAENFR	31	0	3120.47	ENSMMUP00000002581	ENSMMUP00000002581	yes	yes	3	5.9506e-11	82.169	4	3	4	4	3	4	92852000	32010000	26556000	34286000
24978	434	TLFPLIEAK	9	0	1030.61	ENSMMUP00000002581	ENSMMUP00000002581	yes	yes	2	0.0045621	91.087	2	1	2	2	1	2	96128000	73305000	15802000	7020800
28611	434	YAPTEAQLNAVDALIDSMSLAK	22	0	2320.16	ENSMMUP00000002581	ENSMMUP00000002581	yes	yes	2,3	1.4324e-134	250.94	18	16	16	18	16	16	4077400000	1035900000	1660800000	1380700000
28612	434	YAPTEAQLNAVDALIDSMSLAKK	23	1	2448.26	ENSMMUP00000002581	ENSMMUP00000002581	yes	yes	3	4.2713e-05	77.031		1	2		1	2	36175000	0	8705400	27469000
6777	435	EWASLLEFVR	10	0	1248.65	ENSMMUP00000002588	ENSMMUP00000002588	yes	yes	2	0.00045129	110.38		2	1		2	1	1059400	0	850270	209170
20582	435	PLPMPSVSEDEK	12	0	1327.63	ENSMMUP00000002588;ENSMMUP00000002589	ENSMMUP00000002588	yes	no	3	0.1237	56.359	1			1			457380	457380	0	0
4034	436	DRPFFAGLVK	10	1	1148.63	ENSMMUP00000002591;ENSMMUP00000034832;ENSMMUP00000002594	ENSMMUP00000002591	yes	no	2,3	0.0017671	110.53	4	4	3	4	4	3	63714000	23535000	34562000	5617200
4035	436	DRPFFPGLVK	10	1	1174.65	ENSMMUP00000002591;ENSMMUP00000034832;ENSMMUP00000034829;ENSMMUP00000034831	ENSMMUP00000002591	yes	no	2,3	0.00072902	120.09	8	7	7	8	7	7	1670000000	639820000	537470000	492720000
5512	436	EISLWFKPEELVDYK	15	1	1894.97	ENSMMUP00000002591;ENSMMUP00000034832;ENSMMUP00000034829;ENSMMUP00000034831	ENSMMUP00000002591	yes	no	2,3	2.6398e-52	220.97	26	14	20	26	14	20	2992800000	1010000000	1516500000	466320000
7745	436	FMQASEDLLKEHYIDLK	17	1	2079.03	ENSMMUP00000002591;ENSMMUP00000034832;ENSMMUP00000002594	ENSMMUP00000002591	yes	no	3	0.00072041	97.417	1	1		1	1		22411000	12592000	9819300	0
20440	436	PEELVDYK	8	0	991.486	ENSMMUP00000002591;ENSMMUP00000034832;ENSMMUP00000034829;ENSMMUP00000034831	ENSMMUP00000002591	yes	no	1,2	0.011768	86.67	2	2	3	2	2	3	7089800	1490600	2897200	2702000
22186	436	SAEKEISLWFKPEELVDYK	19	2	2310.18	ENSMMUP00000002591;ENSMMUP00000034832;ENSMMUP00000034829;ENSMMUP00000034831	ENSMMUP00000002591	yes	no	2,3,4	1.0458e-21	171	11	12	11	11	12	11	718430000	174600000	482580000	61259000
24628	436	TFIAIKPDGVQR	12	1	1343.76	ENSMMUP00000002591;ENSMMUP00000034832;ENSMMUP00000034829;ENSMMUP00000034831;ENSMMUP00000002594	ENSMMUP00000002591	yes	no	2,3	6.2594e-05	130.56	4	2	3	4	2	3	6688000	4420700	574360	1693000
27058	436	VMLGETNPADSKPGTIR	17	1	1784.91	ENSMMUP00000002591;ENSMMUP00000034832;ENSMMUP00000034829;ENSMMUP00000034831;ENSMMUP00000002594	ENSMMUP00000002591	yes	no	2,3	8.2007e-07	147.64	6	4	7	6	4	7	55338000	27443000	14297000	13598000
29234	436	YMHSGPVVAMVWEGLNVVK	19	0	2115.06	ENSMMUP00000002591;ENSMMUP00000034832;ENSMMUP00000002594	ENSMMUP00000002591	yes	no	2,3	4.2373e-31	185.02	24	18	25	24	18	25	153600000	39389000	72824000	41391000
29240	436	YMNSGPVVAMVWEGLNVVK	19	0	2092.05	ENSMMUP00000002591;ENSMMUP00000034832;ENSMMUP00000034829;ENSMMUP00000034831	ENSMMUP00000002591	yes	no	2,3	2.7212e-136	261.64	74	70	63	74	70	63	1853600000	468940000	844320000	540340000
10237	437	GVDLFESFFPYQVTER	16	0	1932.93	ENSMMUP00000002609	ENSMMUP00000002609	yes	yes	2,3	1.469e-31	200.77	2	5	4	2	5	4	89261000	14106000	46342000	28814000
19482	437	NIHGVPAMAQLTLSSLADQHEVLTEYK	27	0	2964.5	ENSMMUP00000002609	ENSMMUP00000002609	yes	yes	4	1.9841e-05	72.145			1			1	11898000	0	0	11898000
21979	437	RPVGGFLLDGFQGNPTTLETR	21	1	2274.18	ENSMMUP00000002609	ENSMMUP00000002609	yes	yes	3	1.2828e-10	126.4			2			2	9740000	0	0	9740000
2050	438	ATNIEVLSNTFQFTNEAR	18	0	2054.01	ENSMMUP00000002632;ENSMMUP00000002634	ENSMMUP00000002632	yes	no	2	5.2147e-06	112.16	1	1		1	1		9238100	2602700	6635400	0
3960	438	DQFGFINYEVGDSKK	15	1	1745.83	ENSMMUP00000002632;ENSMMUP00000002634;ENSMMUP00000002633	ENSMMUP00000002632	yes	no	2,3	0.0020085	80.387	1		1	1		1	1456200	961740	0	494470
5433	438	EIFFHYSEFK	10	0	1345.63	ENSMMUP00000002632;ENSMMUP00000002634	ENSMMUP00000002632	yes	no	2,3	1.7766e-09	160.36	2	1	3	2	1	3	34720000	14526000	9101800	11092000
8637	438	GDLETLQPGDDVEFTIK	17	0	1875.91	ENSMMUP00000002632;ENSMMUP00000002634	ENSMMUP00000002632	yes	no	2	0.018361	55.546	1	1		1	1		14300000	4620500	9679700	0
12256	438	IKVDFVIPK	9	1	1057.65	ENSMMUP00000002632;ENSMMUP00000002634	ENSMMUP00000002632	yes	no	3	0.0033484	123.86	4	2	4	4	2	4	33359000	17086000	4866700	11407000
24806	438	THSVNGITEEADPTIYSGK	19	0	2017.96	ENSMMUP00000002632;ENSMMUP00000002634	ENSMMUP00000002632	yes	no	3	1.4347e-05	101.53	1			1			323460	323460	0	0
4695	439	EAMFDDDADQFPDDLSLDHSDLVAELLK	28	0	3163.42	ENSMMUP00000002639;ENSMMUP00000002637	ENSMMUP00000002639	yes	no	3	1.0845e-18	110.14	1	1	1	1	1	1	92901000	19212000	45383000	28306000
6420	439	ESFPNDLQFNILMR	14	0	1722.84	ENSMMUP00000002639;ENSMMUP00000002637	ENSMMUP00000002639	yes	no	2	4.3073e-05	117.07	1	3	2	1	3	2	10369000	918340	6655500	2795000
6573	439	ETLNLLLPEIMPGLIQGYDNSESSVR	26	0	2887.46	ENSMMUP00000002639;ENSMMUP00000002637	ENSMMUP00000002639	yes	no	3	3.1648e-11	98.533	1	1		1	1		6497300	2093900	4403400	0
11480	439	IALYELMK	8	0	979.541	ENSMMUP00000002639;ENSMMUP00000002637	ENSMMUP00000002639	yes	no	2	0.033393	79.116	1	1	1	1	1	1	6197000	2971100	1291900	1934000
17605	439	LTQEESFSVWDEHFK	15	0	1880.86	ENSMMUP00000002639;ENSMMUP00000002637	ENSMMUP00000002639	yes	no	2,3	4.1538e-05	122.93	2	1	1	2	1	1	28024000	9770100	10086000	8168300
22611	439	SFQPLGPGYGISQSSR	16	0	1679.83	ENSMMUP00000002639	ENSMMUP00000002639	yes	yes	2	0.00028356	96.208		1			1		2895600	0	2895600	0
7038	440	FDHGAEAIVPTLFNLVPNSAK	21	0	2239.16	ENSMMUP00000002641;ENSMMUP00000002650;ENSMMUP00000002647	ENSMMUP00000002641	yes	no	3	0.0034098	58.49		1			1		2399400	0	2399400	0
23258	440	SLLVAGAAQYDCFFQHLR	18	0	2095.03	ENSMMUP00000002641;ENSMMUP00000002650;ENSMMUP00000002647	ENSMMUP00000002641	yes	no	3	0.0003508	82.651	1	1	1	1	1	1	10768000	6331800	2272400	2164100
867	443	AHFFLGQCQLEMESYDEAIANLQR	24	0	2869.32	ENSMMUP00000002653	ENSMMUP00000002653	yes	yes	3	6.3851e-12	115.42			1			1	5647700	0	0	5647700
10579	443	HDKYMADMDELFSQVDEK	18	1	2199.95	ENSMMUP00000002653	ENSMMUP00000002653	yes	yes	3	2.8672e-05	118.24		1	1		1	1	3411000	0	1820200	1590900
12862	443	ISFELMR	7	0	894.463	ENSMMUP00000002653	ENSMMUP00000002653	yes	yes	2	0.11546	51.854	1			1			2445400	2445400	0	0
16660	443	LNFGDDIPSALR	12	0	1316.67	ENSMMUP00000002653	ENSMMUP00000002653	yes	yes	2	0.0011886	94.122	1	1		1	1		13911000	8375500	5535300	0
23591	443	SPLTQEQLIPNLAMK	15	0	1681.91	ENSMMUP00000002653	ENSMMUP00000002653	yes	yes	2	6.2136e-05	110.55		1			1		1765300	0	1765300	0
[truncated: 25,888 more rows]
