# Supplementary material for: Unravelling the proteome of adult rhesus monkey ovaries
Source: Royal Society of Chemistry journal article supplement (doi:10.1039/c3mb70312f), 2013-11-25
Supplement: c3mb70312f_3.xlsx [file c3mb70312f_3.xlsx]

## Sheet: BP
Supplementary Data 3a: Biological process analysis of homologous human gene symbols
Category	ID	Name	P-value	Hit Count in Query List	Hit Count in Genome	Hit in Query List
GO: Biological Process	GO:0046907	intracellular transport	2.26e-55	479	1234	ARFGAP3,ABCA1,NAPG,NAPA,SNAP23,ADAM10,ADAR,SNX4,GBF1,NOC2L,AP3D1,PARP1,ADRBK2,AP1M1,AP1G2,AP1S2,AP2B1,MTMR2,AP1B1,AP2A2,AP2A1,AP1G1,KIAA1279,AGT,AKT1,SQSTM1,MCM3AP,ABCD1,ANK2,SPAG9,TIMM13,AIP,ANK3,SLC25A6,APOE,ARCN1,ARSB,ARRB1,ARL3,ARL1,DCLK1,RHOB,ASPH,ARHGEF2,ZW10,HGS,VPS26B,ATP5C1,ATP5A1,ATP2A2,PICALM,ATP5J,RAB3GAP2,SAMM50,CLTCL1,BID,BAK1,BAX,COG4,BCL2,PIP5K1A,EEA1,STX7,DST,VPS51,FZD1,CAMK2D,CA…
GO: Biological Process	GO:0016071	mRNA metabolic process	1.338e-54	298	631	SREK1,ADAR,RNGTT,RNMT,PRPF31,PRPF4B,AKT1,ATM,PRPF4,SART1,RBM10,SMC1A,C1QBP,THOC5,KHSRP,UPF2,DHX16,PNPT1,CNOT10,SRSF9,GEMIN5,CDK11B,CDC5L,KIAA1429,CDK13,EIF4A3,DHX38,THOC6,PCF11,PSMD6,DDX46,THRAP3,NAA38,RBM8A,PTBP3,THOC1,HNRPDL,CSTF3,CSTF1,SUGP2,CRNKL1,CDC40,MAPK14,HNRNPR,PSMD14,DDX39A,WDR77,PSME3,DDX41,ALYREF,DHX8,DDX6,DHX9,DDX5,DDX1,MAPKAPK2,SRSF11,EFTUD2,SNRNP40,GEMIN6,QKI,DHX15,CPSF7,PSMF1,NUD…
GO: Biological Process	GO:1901565	organonitrogen compound catabolic process	3.606e-54	386	920	HIBCH,ARFGAP3,IQGAP1,ACAT1,ACADSB,ACTC1,GNL3,ADA,ABCC3,KYNU,MBD4,ADSS,SGPL1,ARHGEF7,ALDH1A1,ABCD1,AKT2,BIN1,AMPD3,GGACT,AMBP,ARF5,ARF6,ARSB,ARRB1,ARRB2,ARL1,ARHGAP6,ARHGAP5,ARHGAP4,ARHGAP1,RHOG,RHOB,ASL,ASNA1,ATP1A1,ATP5C1,ATP6V0D1,ALDH7A1,RGN,ATP5A1,ATP2A2,ATP6V0C,ATP5J,RAB3GAP2,ATP6V1C1,BGN,BCAT2,BCKDHB,PIP5K1A,BLVRB,BLVRA,TBC1D10B,KMO,SMARCA5,CCBL1,PKP4,CAT,ENTPD1,ALDH4A1,RIC8A,ATL3,CDC42,CDA,…
GO: Biological Process	GO:0043436	oxoacid metabolic process	3.939e-53	420	1044	SUCLG1,HIBCH,SUCLA2,AARS,ACACA,ACAA1,ACADM,ACADS,ACADL,ACAT1,ACADSB,ACADVL,ACOX1,ACO2,ACO1,ABCC3,KYNU,ADH7,ADSS,AGT,VNN1,AKT1,SGPL1,EIF2B2,ALDH9A1,ALDH1A1,EIF2B4,B3GAT3,ALB,ABCD1,AKT2,PHGDH,GGH,GMPS,ALDH1A2,ALOX15,ALOX5,GGACT,PAPSS2,PAPSS1,NFS1,ANXA1,APOA4,APOA2,APOC3,APOC2,P4HA2,ARSB,GSTK1,ASL,ATIC,SLC16A3,ALDH7A1,RGN,ACOX3,BHMT,BGN,BCAT2,BCKDHB,BTD,BPHL,YARS,KMO,SLC25A20,GLCE,DEGS1,CCBL1,AASDHP…
GO: Biological Process	GO:0019752	carboxylic acid metabolic process	2.941e-52	385	930	SUCLG1,HIBCH,SUCLA2,AARS,ACACA,ACAA1,ACADM,ACADS,ACADL,ACAT1,ACADSB,ACADVL,ACOX1,ACO2,ACO1,ABCC3,KYNU,ADH7,ADSS,AGT,VNN1,AKT1,SGPL1,EIF2B2,ALDH9A1,ALDH1A1,EIF2B4,ALB,ABCD1,AKT2,PHGDH,GGH,GMPS,ALDH1A2,ALOX15,ALOX5,GGACT,NFS1,ANXA1,APOA4,APOA2,APOC3,APOC2,P4HA2,GSTK1,ASL,ATIC,SLC16A3,ALDH7A1,RGN,ACOX3,BHMT,BGN,BCAT2,BCKDHB,BTD,BPHL,YARS,KMO,SLC25A20,DEGS1,CCBL1,AASDHPPT,PPCDC,CAV1,CARS,ALDH4A1,AKR1…
GO: Biological Process	GO:0019637	organophosphate metabolic process	3.162e-52	528	1439	DPM1,ARFGAP3,ABCA1,IQGAP1,ACACA,MTMR1,AK7,ACTC1,GNL3,ADA,ADCY3,ABCC3,KYNU,MBD4,ADK,ADRBK2,ADSL,ADSS,MTMR2,ADSSL1,AK4,AK2,SGPL1,AK1,ARHGEF7,ALDH1A1,ABCD1,AKT2,ALDOC,ALDOA,GMPS,BIN1,AMPD3,PAPSS2,PAPSS1,AMPD2,NFS1,APOA4,APOA2,APOE,APOC2,ARF5,ARF6,APRT,ARSA,ARSB,ARRB1,ARRB2,ARSD,ARL1,ARHGAP6,ARHGAP5,ARHGAP4,ARHGAP1,RHOG,RHOB,ASNA1,ASAH1,ATP1A3,ATP1A1,ATP1A2,ATM,ATIC,ATP5C1,ATP6V0D1,RGN,ATP5A1,MTMR6,A…
GO: Biological Process	GO:0006082	organic acid metabolic process	3.84e-52	423	1062	SUCLG1,HIBCH,SUCLA2,AARS,ACACA,ACAA1,ACADM,ACADS,ACADL,ACAT1,ACADSB,ACADVL,ACOX1,ACO2,ACO1,ABCC3,KYNU,ADH7,ADSS,AGT,VNN1,AKT1,SGPL1,EIF2B2,ALDH9A1,ALDH1A1,EIF2B4,B3GAT3,ALB,ABCD1,AKT2,PHGDH,GGH,GMPS,ALDH1A2,ALOX15,ALOX5,GGACT,PAPSS2,PAPSS1,NFS1,ANXA1,APOA4,APOA2,APOC3,APOC2,P4HA2,ARSB,GSTK1,ASL,ATIC,SLC16A3,ALDH7A1,RGN,ACOX3,BHMT,BGN,BCAT2,BCKDHB,BTD,BPHL,YARS,KMO,SLC25A20,GLCE,DEGS1,CCBL1,AASDHP…
GO: Biological Process	GO:0044270	cellular nitrogen compound catabolic process	5.053e-47	395	1004	ARFGAP3,IQGAP1,ACADL,ACTC1,GNL3,PABPC4,ADA,ABCC3,KYNU,MBD4,ADSS,ARHGEF7,ALDH1A1,ABCD1,AKT2,BIN1,AMPD3,AMBP,APAF1,ARF5,ARF6,ARRB1,ARRB2,ARL1,ARHGAP6,ARHGAP5,ARHGAP4,ARHGAP1,RHOG,RHOB,ASNA1,ATP1A1,ATM,AIFM1,ATP5C1,ATP6V0D1,RGN,ATP5A1,ATP2A2,ATP6V0C,ATP5J,RAB3GAP2,ATP6V1C1,BHMT,BAX,PIP5K1A,BLVRB,BLVRA,FOXL2,TBC1D10B,KMO,UPF2,SMARCA5,CCBL1,PKP4,CAT,PNPT1,ENTPD1,ENTPD2,CNOT10,RIC8A,ATL3,CDC42,CDA,EIF4…
GO: Biological Process	GO:0046700	heterocycle catabolic process	1.044e-45	392	1004	ARFGAP3,IQGAP1,ACTC1,GNL3,PABPC4,ADA,ABCC3,KYNU,MBD4,ADSS,ARHGEF7,ALDH1A1,ABCD1,AKT2,BIN1,AMPD3,AMBP,APAF1,ARF5,ARF6,ARRB1,ARRB2,ARL1,ARHGAP6,ARHGAP5,ARHGAP4,ARHGAP1,RHOG,RHOB,ASNA1,ATP1A1,ATM,AIFM1,ATP5C1,ATP6V0D1,RGN,ATP5A1,ATP2A2,ATP6V0C,ATP5J,RAB3GAP2,ATP6V1C1,BAX,PIP5K1A,BLVRB,BLVRA,FOXL2,TBC1D10B,KMO,UPF2,SMARCA5,CCBL1,PKP4,CAT,PNPT1,ENTPD1,ENTPD2,ALDH4A1,CNOT10,RIC8A,ATL3,CDC42,CDA,EIF4A3,…
GO: Biological Process	GO:1901361	organic cyclic compound catabolic process	2.498e-45	401	1039	ARFGAP3,IQGAP1,ACTC1,GNL3,PABPC4,ADA,ABCC3,KYNU,MBD4,ADSS,ARHGEF7,ALDH1A1,ABCD1,AKT2,BIN1,AMPD3,AMBP,APAF1,APOE,ARF5,ARF6,ARRB1,ARRB2,ARL1,ARHGAP6,ARHGAP5,ARHGAP4,ARHGAP1,RHOG,RHOB,ASNA1,ATP1A1,ATM,AIFM1,ATP5C1,ATP6V0D1,RGN,ATP5A1,ATP2A2,ATP6V0C,ATP5J,RAB3GAP2,ATP6V1C1,BAX,PIP5K1A,BLVRB,BLVRA,FOXL2,TBC1D10B,KMO,UPF2,SMARCA5,CCBL1,PKP4,CAT,PNPT1,ENTPD1,ENTPD2,ALDH4A1,AKR1C3,CNOT10,RIC8A,ATL3,CDC42…
GO: Biological Process	GO:0055086	nucleobase-containing small molecule metabolic process	2.662e-45	418	1100	DPM1,ARFGAP3,ABCA1,IQGAP1,ACACA,AK7,ACTC1,GNL3,ADA,ADCY3,ABCC3,KYNU,MBD4,ADK,ADSL,ADSS,ADSSL1,AK4,AK2,AK1,ARHGEF7,ALDH1A1,ABCD1,AKT2,ALDOA,GMPS,BIN1,AMPD3,PAPSS2,PAPSS1,AMPD2,APOE,ARF5,ARF6,APRT,ARRB1,ARRB2,ARL1,ARHGAP6,ARHGAP5,ARHGAP4,ARHGAP1,RHOG,RHOB,ASNA1,ATP1A3,ATP1A1,ATP1A2,ATIC,ATP5C1,ATP6V0D1,RGN,ATP5A1,ATP2B4,ATP2A3,ATP2A2,ATP2B1,ATP1B1,ATP6V1B1,ATP6V1B2,ATP6V0C,ATP5J,RAB3GAP2,ATP6V1C1,P…
GO: Biological Process	GO:0006396	RNA processing	3.405e-45	296	680	AARS,SREK1,PABPC4,ADAR,RNGTT,RNMT,PRPF31,PRPF4B,AKT2,RRP9,PRPF4,SART1,RBM10,SMC1A,C1QBP,THOC5,PRKRA,KHSRP,DHX16,ELAC2,PNPT1,CNOT10,SRSF9,INTS7,GEMIN5,RTCA,CDK11B,CDC5L,KIAA1429,CDK13,EIF4A3,DHX38,C22orf28,SART3,THOC6,PCF11,SRRT,TRMT6,NOP58,DDX46,THRAP3,NAA38,RBM8A,PTBP3,THOC1,HNRPDL,DDX54,CSTF3,CSTF1,ARL6IP4,SUGP2,CRNKL1,CDC40,HNRNPR,DDX39A,WDR77,MPHOSPH10,DDX41,ALYREF,NOC4L,NOLC1,DHX8,DHX9,DDX5,…
GO: Biological Process	GO:0008380	RNA splicing	4.263e-45	184	337	SREK1,PRPF31,PRPF4B,AKT2,PRPF4,SART1,RBM10,SMC1A,C1QBP,THOC5,KHSRP,DHX16,SRSF9,GEMIN5,CDC5L,KIAA1429,CDK13,EIF4A3,DHX38,C22orf28,THOC6,PCF11,DDX46,THRAP3,NAA38,RBM8A,PTBP3,THOC1,CSTF3,CSTF1,ARL6IP4,SUGP2,CRNKL1,CDC40,HNRNPR,DDX39A,WDR77,MPHOSPH10,DDX41,ALYREF,DHX8,DHX9,DDX5,DDX1,SRSF11,EFTUD2,PPIG,SNRNP40,GEMIN6,QKI,DHX15,CPSF7,LUC7L3,WBP11,AQR,SF3B2,GEMIN4,SF3A3,HNRNPA0,RNPS1,PAPOLA,TXNL4A,DDX20…
GO: Biological Process	GO:0019439	aromatic compound catabolic process	5.672e-45	392	1010	ARFGAP3,IQGAP1,ACTC1,GNL3,PABPC4,ADA,ABCC3,KYNU,MBD4,ADSS,ARHGEF7,ALDH1A1,ABCD1,AKT2,BIN1,AMPD3,AMBP,APAF1,ARF5,ARF6,ARRB1,ARRB2,ARL1,ARHGAP6,ARHGAP5,ARHGAP4,ARHGAP1,RHOG,RHOB,ASNA1,ATP1A1,ATM,AIFM1,ATP5C1,ATP6V0D1,RGN,ATP5A1,ATP2A2,ATP6V0C,ATP5J,RAB3GAP2,ATP6V1C1,BAX,PIP5K1A,BLVRB,BLVRA,FOXL2,TBC1D10B,KMO,UPF2,SMARCA5,CCBL1,PKP4,CAT,PNPT1,ENTPD1,ENTPD2,CNOT10,RIC8A,ATL3,CDC42,CDA,EIF4A3,TBC1D5,D…
GO: Biological Process	GO:0000375	RNA splicing, via transesterification reactions	1.791e-44	140	222	PRPF31,PRPF4B,PRPF4,SART1,SMC1A,C1QBP,KHSRP,SRSF9,GEMIN5,CDC5L,CDK13,EIF4A3,DHX38,PCF11,THRAP3,NAA38,RBM8A,CSTF3,CSTF1,CRNKL1,CDC40,HNRNPR,DDX39A,WDR77,MPHOSPH10,DDX41,ALYREF,DHX8,DHX9,DDX5,DDX1,SRSF11,EFTUD2,SNRNP40,GEMIN6,CPSF7,AQR,SF3B2,GEMIN4,SF3A3,HNRNPA0,RNPS1,PAPOLA,TXNL4A,DDX20,FRG1,FUS,HNRNPUL1,NUDT21,PPIE,SYNCRIP,DBR1,PPIH,PRMT5,CD2BP2,SF3B4,SRRM1,SF3A1,CWC27,BCAS2,USP39,RBM25,GTF2F2,CE…
GO: Biological Process	GO:0006397	mRNA processing	2.178e-44	211	418	SREK1,ADAR,RNGTT,RNMT,PRPF31,PRPF4B,PRPF4,SART1,RBM10,SMC1A,C1QBP,THOC5,KHSRP,DHX16,PNPT1,CNOT10,SRSF9,GEMIN5,CDK11B,CDC5L,KIAA1429,CDK13,EIF4A3,DHX38,THOC6,PCF11,DDX46,THRAP3,NAA38,RBM8A,PTBP3,THOC1,CSTF3,CSTF1,SUGP2,CRNKL1,CDC40,HNRNPR,DDX39A,WDR77,DDX41,ALYREF,DHX8,DHX9,DDX5,DDX1,SRSF11,EFTUD2,SNRNP40,GEMIN6,QKI,DHX15,CPSF7,LUC7L3,WBP11,EIF4B,EIF4G1,CDC73,AQR,SF3B2,GEMIN4,SF3A3,HNRNPA0,RNPS1,P…
GO: Biological Process	GO:0045184	establishment of protein localization	6.377e-44	491	1381	VPS33B,ARFGAP3,ABCA1,NAPG,NAPA,SNAP23,ACTN4,CEP41,ADAR,SNX3,SNX4,AP3D1,PARP1,ADRBK2,AP1M1,AP1G2,AP1S2,AP2B1,AP1B1,AP2A2,AP2A1,AP1G1,GAPVD1,AGT,AKT1,MCM3AP,ANK2,TIMM13,AIP,ANK3,SLC25A6,ANXA1,APOB,APOA2,APOC3,APOC2,ARCN1,ARF5,ARF6,ARRB1,ARRB2,ARL3,RHOG,RHOB,ASPH,ARHGEF2,ZW10,HGS,RABEP1,VPS26B,ATP6V0D1,UNC119,ATP6V1B1,PICALM,ATP6V1B2,ATP6V0C,RAB3GAP2,ATP6V0A1,ATP6V1E1,ATP6V1C1,SAMM50,CLTCL1,BID,BAX,…
GO: Biological Process	GO:0009117	nucleotide metabolic process	8.082e-44	398	1041	DPM1,ARFGAP3,ABCA1,IQGAP1,ACACA,AK7,ACTC1,GNL3,ADA,ADCY3,ABCC3,KYNU,MBD4,ADK,ADSL,ADSS,ADSSL1,AK4,AK2,AK1,ARHGEF7,ALDH1A1,ABCD1,AKT2,ALDOA,GMPS,BIN1,AMPD3,PAPSS2,PAPSS1,AMPD2,APOE,ARF5,ARF6,APRT,ARRB1,ARRB2,ARL1,ARHGAP6,ARHGAP5,ARHGAP4,ARHGAP1,RHOG,RHOB,ASNA1,ATP1A3,ATP1A1,ATP1A2,ATIC,ATP5C1,ATP6V0D1,RGN,ATP5A1,ATP2B4,ATP2A3,ATP2A2,ATP2B1,ATP1B1,ATP6V1B1,ATP6V1B2,ATP6V0C,ATP5J,RAB3GAP2,ATP6V1C1,P…
GO: Biological Process	GO:0016192	vesicle-mediated transport	1.61e-43	381	983	A2M,VPS33B,ARFGAP3,ABCA1,ABR,NRP1,NAPG,NAPA,SNAP23,ACTN1,ACTN4,ACTN2,ADD1,SNX3,SNX4,GBF1,AP3D1,ADRBK1,ADRBK2,AP1M1,AP1G2,AP1S2,CPNE1,AP2B1,MTMR2,AP1B1,AP2A2,AP2A1,AP1G1,GAPVD1,AHSG,AIF1,CPNE3,ALB,ALDOA,TRAPPC6B,BIN1,SPAG9,ANXA3,ANXA11,ANK3,ANXA1,ANXA2,APOB,APOE,APOC3,APOC2,ARCN1,WASL,ARF5,ARF6,ARRB1,ARRB2,ARL1,ZW10,RABEP1,TRAPPC11,DYSF,PICALM,CLTCL1,COG4,PIP5K1A,EEA1,BTK,STX7,VPS51,SERPING1,CANX,…
GO: Biological Process	GO:0006753	nucleoside phosphate metabolic process	1.736e-43	400	1051	DPM1,ARFGAP3,ABCA1,IQGAP1,ACACA,AK7,ACTC1,GNL3,ADA,ADCY3,ABCC3,KYNU,MBD4,ADK,ADSL,ADSS,ADSSL1,AK4,AK2,AK1,ARHGEF7,ALDH1A1,ABCD1,AKT2,ALDOA,GMPS,BIN1,AMPD3,PAPSS2,PAPSS1,AMPD2,APOE,ARF5,ARF6,APRT,ARRB1,ARRB2,ARL1,ARHGAP6,ARHGAP5,ARHGAP4,ARHGAP1,RHOG,RHOB,ASNA1,ATP1A3,ATP1A1,ATP1A2,ATIC,ATP5C1,ATP6V0D1,RGN,ATP5A1,ATP2B4,ATP2A3,ATP2A2,ATP2B1,ATP1B1,ATP6V1B1,ATP6V1B2,ATP6V0C,ATP5J,RAB3GAP2,ATP6V1C1,P…
GO: Biological Process	GO:1901657	glycosyl compound metabolic process	3.228e-43	326	794	ARFGAP3,IQGAP1,ACACA,ACTC1,GNL3,ADA,ABCC3,ADK,ADSL,ADSS,ADSSL1,AK4,AK2,AK1,ARHGEF7,ALDH1A1,ABCD1,AKT2,ALDOA,GMPS,BIN1,AMPD3,PAPSS2,PAPSS1,ARF5,ARF6,APRT,ARRB1,ARRB2,ARL1,ARHGAP6,ARHGAP5,ARHGAP4,ARHGAP1,RHOG,RHOB,ASNA1,ATP1A3,ATP1A1,ATP1A2,ATIC,ATP5C1,ATP6V0D1,RGN,ATP5A1,ATP2B4,ATP2A3,ATP2A2,ATP2B1,ATP1B1,ATP6V1B1,ATP6V1B2,ATP6V0C,ATP5J,RAB3GAP2,ATP6V1C1,PIP5K1A,TBC1D10B,SMARCA5,PPCDC,PKP4,ENTPD1,…
GO: Biological Process	GO:0015031	protein transport	3.326e-43	476	1332	VPS33B,ARFGAP3,ABCA1,NAPG,NAPA,SNAP23,ACTN4,CEP41,ADAR,SNX3,SNX4,AP3D1,PARP1,ADRBK2,AP1M1,AP1G2,AP1S2,AP2B1,AP1B1,AP2A2,AP2A1,AP1G1,GAPVD1,AGT,AKT1,MCM3AP,ANK2,TIMM13,AIP,ANK3,SLC25A6,ANXA1,APOB,APOA2,APOC3,APOC2,ARCN1,ARF5,ARF6,ARRB1,ARRB2,ARL3,RHOB,ASPH,ARHGEF2,ZW10,HGS,RABEP1,VPS26B,ATP6V0D1,UNC119,ATP6V1B1,PICALM,ATP6V1B2,ATP6V0C,RAB3GAP2,ATP6V0A1,ATP6V1E1,ATP6V1C1,SAMM50,CLTCL1,BID,COG4,PIP5…
GO: Biological Process	GO:0009116	nucleoside metabolic process	3.934e-43	322	781	ARFGAP3,IQGAP1,ACACA,ACTC1,GNL3,ADA,ABCC3,ADK,ADSL,ADSS,ADSSL1,AK4,AK2,AK1,ARHGEF7,ALDH1A1,ABCD1,AKT2,ALDOA,GMPS,BIN1,AMPD3,PAPSS2,PAPSS1,ARF5,ARF6,APRT,ARRB1,ARRB2,ARL1,ARHGAP6,ARHGAP5,ARHGAP4,ARHGAP1,RHOG,RHOB,ASNA1,ATP1A3,ATP1A1,ATP1A2,ATIC,ATP5C1,ATP6V0D1,RGN,ATP5A1,ATP2B4,ATP2A3,ATP2A2,ATP2B1,ATP1B1,ATP6V1B1,ATP6V1B2,ATP6V0C,ATP5J,RAB3GAP2,ATP6V1C1,PIP5K1A,TBC1D10B,SMARCA5,PPCDC,PKP4,ENTPD1,…
GO: Biological Process	GO:0000377	RNA splicing, via transesterification reactions with bulged adenosine as nucleophile	4.07e-43	136	216	PRPF31,PRPF4B,PRPF4,SART1,SMC1A,C1QBP,SRSF9,GEMIN5,CDC5L,CDK13,EIF4A3,DHX38,PCF11,THRAP3,NAA38,RBM8A,CSTF3,CSTF1,CRNKL1,CDC40,HNRNPR,DDX39A,WDR77,DDX41,ALYREF,DHX8,DHX9,DDX5,DDX1,SRSF11,EFTUD2,SNRNP40,GEMIN6,CPSF7,AQR,SF3B2,GEMIN4,SF3A3,HNRNPA0,RNPS1,PAPOLA,TXNL4A,DDX20,FRG1,FUS,HNRNPUL1,NUDT21,PPIE,SYNCRIP,DBR1,PPIH,PRMT5,CD2BP2,SF3B4,SRRM1,SF3A1,CWC27,USP39,RBM25,GTF2F2,CELF2,PRPF8,LSM3,HNRNPU,…
GO: Biological Process	GO:0000398	mRNA splicing, via spliceosome	4.07e-43	136	216	PRPF31,PRPF4B,PRPF4,SART1,SMC1A,C1QBP,SRSF9,GEMIN5,CDC5L,CDK13,EIF4A3,DHX38,PCF11,THRAP3,NAA38,RBM8A,CSTF3,CSTF1,CRNKL1,CDC40,HNRNPR,DDX39A,WDR77,DDX41,ALYREF,DHX8,DHX9,DDX5,DDX1,SRSF11,EFTUD2,SNRNP40,GEMIN6,CPSF7,AQR,SF3B2,GEMIN4,SF3A3,HNRNPA0,RNPS1,PAPOLA,TXNL4A,DDX20,FRG1,FUS,HNRNPUL1,NUDT21,PPIE,SYNCRIP,DBR1,PPIH,PRMT5,CD2BP2,SF3B4,SRRM1,SF3A1,CWC27,USP39,RBM25,GTF2F2,CELF2,PRPF8,LSM3,HNRNPU,…
GO: Biological Process	GO:0034655	nucleobase-containing compound catabolic process	1.913e-42	372	960	ARFGAP3,IQGAP1,ACTC1,GNL3,PABPC4,ADA,ABCC3,MBD4,ADSS,ARHGEF7,ALDH1A1,ABCD1,AKT2,BIN1,AMPD3,APAF1,ARF5,ARF6,ARRB1,ARRB2,ARL1,ARHGAP6,ARHGAP5,ARHGAP4,ARHGAP1,RHOG,RHOB,ASNA1,ATP1A1,ATM,AIFM1,ATP5C1,ATP6V0D1,RGN,ATP5A1,ATP2A2,ATP6V0C,ATP5J,RAB3GAP2,ATP6V1C1,BAX,PIP5K1A,FOXL2,TBC1D10B,UPF2,SMARCA5,PKP4,CAT,PNPT1,ENTPD1,ENTPD2,CNOT10,RIC8A,ATL3,CDC42,CDA,EIF4A3,TBC1D5,DOCK4,PTPLAD1,CHN1,ACAP1,RAB14,GI…
GO: Biological Process	GO:1901136	carbohydrate derivative catabolic process	4.921e-42	307	738	ARFGAP3,IQGAP1,FBXO6,ACTC1,GNL3,ADA,ABCC3,MBD4,ADSS,ARHGEF7,ALDH1A1,ABCD1,AKT2,BIN1,AMPD3,ARF5,ARF6,ARSB,ARRB1,ARRB2,ARL1,ARHGAP6,ARHGAP5,ARHGAP4,ARHGAP1,RHOG,RHOB,ASNA1,ATP1A1,ATP5C1,ATP6V0D1,ATP5A1,ATP2A2,ATP6V0C,ATP5J,RAB3GAP2,ATP6V1C1,BGN,PIP5K1A,TBC1D10B,SMARCA5,PKP4,ENTPD1,RIC8A,ATL3,CDC42,CDA,CD44,CHI3L1,CHIT1,TBC1D5,DOCK4,PTPLAD1,CHN1,ACAP1,STT3B,RAB14,GIT2,ATP6V1H,PSMD6,TBC1D4,MFN2,GNPDA…
GO: Biological Process	GO:0042278	purine nucleoside metabolic process	1.176e-40	297	714	ARFGAP3,IQGAP1,ACACA,ACTC1,GNL3,ADA,ABCC3,ADK,ADSL,ADSS,ADSSL1,AK4,AK2,AK1,ARHGEF7,ALDH1A1,ABCD1,AKT2,ALDOA,GMPS,BIN1,AMPD3,PAPSS2,PAPSS1,ARF5,ARF6,APRT,ARRB1,ARRB2,ARL1,ARHGAP6,ARHGAP5,ARHGAP4,ARHGAP1,RHOG,RHOB,ASNA1,ATP1A3,ATP1A1,ATP1A2,ATP5C1,ATP6V0D1,ATP5A1,ATP2B4,ATP2A3,ATP2A2,ATP2B1,ATP1B1,ATP6V1B1,ATP6V1B2,ATP6V0C,ATP5J,RAB3GAP2,ATP6V1C1,PIP5K1A,TBC1D10B,SMARCA5,PPCDC,PKP4,ENTPD1,RIC8A,ATL…
GO: Biological Process	GO:0046128	purine ribonucleoside metabolic process	1.329e-40	296	711	ARFGAP3,IQGAP1,ACACA,ACTC1,GNL3,ADA,ABCC3,ADK,ADSL,ADSS,ADSSL1,AK4,AK2,AK1,ARHGEF7,ALDH1A1,ABCD1,AKT2,ALDOA,GMPS,BIN1,AMPD3,PAPSS2,PAPSS1,ARF5,ARF6,APRT,ARRB1,ARRB2,ARL1,ARHGAP6,ARHGAP5,ARHGAP4,ARHGAP1,RHOG,RHOB,ASNA1,ATP1A3,ATP1A1,ATP1A2,ATP5C1,ATP6V0D1,ATP5A1,ATP2B4,ATP2A3,ATP2A2,ATP2B1,ATP1B1,ATP6V1B1,ATP6V1B2,ATP6V0C,ATP5J,RAB3GAP2,ATP6V1C1,PIP5K1A,TBC1D10B,SMARCA5,PPCDC,PKP4,ENTPD1,RIC8A,ATL…
GO: Biological Process	GO:0009119	ribonucleoside metabolic process	2.005e-40	303	736	ARFGAP3,IQGAP1,ACACA,ACTC1,GNL3,ADA,ABCC3,ADK,ADSL,ADSS,ADSSL1,AK4,AK2,AK1,ARHGEF7,ALDH1A1,ABCD1,AKT2,ALDOA,GMPS,BIN1,AMPD3,PAPSS2,PAPSS1,ARF5,ARF6,APRT,ARRB1,ARRB2,ARL1,ARHGAP6,ARHGAP5,ARHGAP4,ARHGAP1,RHOG,RHOB,ASNA1,ATP1A3,ATP1A1,ATP1A2,ATP5C1,ATP6V0D1,ATP5A1,ATP2B4,ATP2A3,ATP2A2,ATP2B1,ATP1B1,ATP6V1B1,ATP6V1B2,ATP6V0C,ATP5J,RAB3GAP2,ATP6V1C1,PIP5K1A,TBC1D10B,SMARCA5,PPCDC,PKP4,ENTPD1,RIC8A,ATL…
GO: Biological Process	GO:0046434	organophosphate catabolic process	1.728e-37	294	727	ARFGAP3,IQGAP1,ACTC1,GNL3,ADA,ABCC3,MBD4,ADSS,MTMR2,ARHGEF7,ALDH1A1,ABCD1,AKT2,BIN1,AMPD3,APOA2,APOC2,ARF5,ARF6,ARRB1,ARRB2,ARL1,ARHGAP6,ARHGAP5,ARHGAP4,ARHGAP1,RHOG,RHOB,ASNA1,ATP1A1,ATP5C1,ATP6V0D1,RGN,ATP5A1,ATP2A2,ATP6V0C,ATP5J,RAB3GAP2,ATP6V1C1,PIP5K1A,TBC1D10B,SMARCA5,PKP4,CAT,ENTPD1,ENTPD2,PLA2G4C,RIC8A,ATL3,CDC42,TBC1D5,DOCK4,PTPLAD1,CHN1,ACAP1,RAB14,GIT2,ATP6V1H,PSMD6,CNN3,CNP,TBC1D4,MFN…
GO: Biological Process	GO:0055114	oxidation-reduction process	1.027e-36	370	1003	SUCLG1,SUCLA2,CREG1,IQGAP1,ACACA,ACAA1,ACADM,ACADS,ACADL,ACADSB,ACADVL,ACOX1,ACO2,ACO1,ADCY3,ADH1B,ADH7,ADSL,AGL,AKT1,ALDH9A1,ALDH1A1,ALDH1B1,ABCD1,AKT2,PHGDH,ALDH3A2,ALDH1A2,ALOX15,ALOX5,AOX1,SLC25A4,SLC25A5,SLC25A6,APOA4,APOA2,APEX1,PLOD3,P4HA2,GSTK1,ASPH,AIFM1,ATP5C1,ALDH7A1,ATP5A1,ATP5J,ACOX3,PGLS,BDH1,PRDX5,BAX,TXN2,BCKDHB,BLVRB,BLVRA,CMAHP,AGPS,CALM3,CYP2U1,KMO,SLC25A20,DEGS1,CBR1,CAT,PNPT1…
GO: Biological Process	GO:0009144	purine nucleoside triphosphate metabolic process	4.483e-36	266	642	ARFGAP3,IQGAP1,ACTC1,GNL3,ADA,ABCC3,ADK,ADSS,AK4,AK2,AK1,ARHGEF7,ALDH1A1,ABCD1,AKT2,ALDOA,BIN1,ARF5,ARF6,ARRB1,ARRB2,ARL1,ARHGAP6,ARHGAP5,ARHGAP4,ARHGAP1,RHOG,RHOB,ASNA1,ATP1A3,ATP1A1,ATP1A2,ATP5C1,ATP6V0D1,ATP5A1,ATP2B4,ATP2A3,ATP2A2,ATP2B1,ATP1B1,ATP6V1B1,ATP6V1B2,ATP6V0C,ATP5J,RAB3GAP2,ATP6V1C1,PIP5K1A,TBC1D10B,SMARCA5,PKP4,ENTPD1,RIC8A,ATL3,CDC42,TBC1D5,DOCK4,PTPLAD1,CHN1,ACAP1,RAB14,GIT2,ATP…
GO: Biological Process	GO:1901292	nucleoside phosphate catabolic process	1.303e-35	275	676	ARFGAP3,IQGAP1,ACTC1,GNL3,ADA,ABCC3,MBD4,ADSS,ARHGEF7,ALDH1A1,ABCD1,AKT2,BIN1,AMPD3,ARF5,ARF6,ARRB1,ARRB2,ARL1,ARHGAP6,ARHGAP5,ARHGAP4,ARHGAP1,RHOG,RHOB,ASNA1,ATP1A1,ATP5C1,ATP6V0D1,RGN,ATP5A1,ATP2A2,ATP6V0C,ATP5J,RAB3GAP2,ATP6V1C1,PIP5K1A,TBC1D10B,SMARCA5,PKP4,CAT,ENTPD1,ENTPD2,RIC8A,ATL3,CDC42,TBC1D5,DOCK4,PTPLAD1,CHN1,ACAP1,RAB14,GIT2,ATP6V1H,PSMD6,CNN3,CNP,TBC1D4,MFN2,CRK,GMPR2,DNAJB6,ARFRP1,…
GO: Biological Process	GO:0043933	macromolecular complex subunit organization	2.075e-35	446	1300	ABCA1,ACACA,ACADM,ACADS,ACADL,NAPG,ACAT1,NAPA,SNAP23,RIPK1,ACTN2,TRADD,ADD1,MBD2,SKAP2,ADSL,PRPF31,AP2B1,MTMR2,AP1B1,AGT,SQSTM1,AHSG,AIF1,ALDH1A1,ALAD,ALDOC,ALDOA,SPAG9,ANXA5,APAF1,NFS1,BAZ1B,APOB,APOA4,APOA2,APOE,APOC3,APOC2,APCS,LIMD1,WASL,ARF6,ARHGAP6,ARHGEF2,ZW10,AIFM1,SART1,ARID1A,PICALM,BCS1L,BID,BAX,COG4,NCK2,C1QBP,CAPG,CAPZA1,CAPZA2,IKBKAP,KCNAB2,CALR,PIAS1,LSM14A,SMARCA5,CAV1,CAPZB,CASP8…
GO: Biological Process	GO:0006520	cellular amino acid metabolic process	2.084e-35	218	488	HIBCH,AARS,ACAT1,ACADSB,KYNU,ADSS,VNN1,EIF2B2,EIF2B4,PHGDH,GGH,GMPS,GGACT,NFS1,P4HA2,GSTK1,ASL,ATIC,ALDH7A1,BHMT,BCAT2,BCKDHB,BPHL,YARS,KMO,CCBL1,AASDHPPT,PPCDC,CARS,ALDH4A1,MTHFD1L,PARS2,SCLY,PSMD6,SDSL,CKB,FARSB,COMT,CTPS1,GGCT,CSAD,PCYOX1L,CRYM,PSMD14,PSME3,PCYOX1,DARS,AIMP1,DBT,NARS2,DNMT1,DNMT3A,NQO1,DLD,DLST,SARDH,PSMF1,UPB1,DPYD,DPEP1,EIF2B1,CARS2,FARSA,FASN,FAH,COASY,EPRS,TARS2,ALDH1L1,AS…
GO: Biological Process	GO:0009166	nucleotide catabolic process	2.968e-35	271	665	ARFGAP3,IQGAP1,ACTC1,GNL3,ADA,ABCC3,MBD4,ADSS,ARHGEF7,ALDH1A1,ABCD1,AKT2,BIN1,AMPD3,ARF5,ARF6,ARRB1,ARRB2,ARL1,ARHGAP6,ARHGAP5,ARHGAP4,ARHGAP1,RHOG,RHOB,ASNA1,ATP1A1,ATP5C1,ATP6V0D1,RGN,ATP5A1,ATP2A2,ATP6V0C,ATP5J,RAB3GAP2,ATP6V1C1,PIP5K1A,TBC1D10B,SMARCA5,PKP4,CAT,ENTPD1,RIC8A,ATL3,CDC42,TBC1D5,DOCK4,PTPLAD1,CHN1,ACAP1,RAB14,GIT2,ATP6V1H,PSMD6,CNN3,CNP,TBC1D4,MFN2,CRK,GMPR2,DNAJB6,ARFRP1,SNX9,EF…
GO: Biological Process	GO:1901658	glycosyl compound catabolic process	3.088e-35	258	621	ARFGAP3,IQGAP1,ACTC1,GNL3,ADA,ABCC3,ADSS,ARHGEF7,ALDH1A1,ABCD1,AKT2,BIN1,AMPD3,ARF5,ARF6,ARRB1,ARRB2,ARL1,ARHGAP6,ARHGAP5,ARHGAP4,ARHGAP1,RHOG,RHOB,ASNA1,ATP1A1,ATP5C1,ATP6V0D1,ATP5A1,ATP2A2,ATP6V0C,ATP5J,RAB3GAP2,ATP6V1C1,PIP5K1A,TBC1D10B,SMARCA5,PKP4,ENTPD1,RIC8A,ATL3,CDC42,CDA,TBC1D5,DOCK4,PTPLAD1,CHN1,ACAP1,RAB14,GIT2,ATP6V1H,PSMD6,TBC1D4,MFN2,CRK,GMPR2,ARFRP1,SNX9,EFTUD1,RAB11B,LRRK2,DDX5,DD…
GO: Biological Process	GO:0009141	nucleoside triphosphate metabolic process	3.374e-35	270	662	ARFGAP3,IQGAP1,ACTC1,GNL3,ADA,ABCC3,ADK,ADSS,AK4,AK2,AK1,ARHGEF7,ALDH1A1,ABCD1,AKT2,ALDOA,BIN1,ARF5,ARF6,ARRB1,ARRB2,ARL1,ARHGAP6,ARHGAP5,ARHGAP4,ARHGAP1,RHOG,RHOB,ASNA1,ATP1A3,ATP1A1,ATP1A2,ATP5C1,ATP6V0D1,ATP5A1,ATP2B4,ATP2A3,ATP2A2,ATP2B1,ATP1B1,ATP6V1B1,ATP6V1B2,ATP6V0C,ATP5J,RAB3GAP2,ATP6V1C1,PIP5K1A,TBC1D10B,SMARCA5,PKP4,ENTPD1,RIC8A,ATL3,CDC42,TBC1D5,DOCK4,PTPLAD1,CHN1,ACAP1,RAB14,GIT2,ATP…
GO: Biological Process	GO:0009164	nucleoside catabolic process	1.598e-34	255	616	ARFGAP3,IQGAP1,ACTC1,GNL3,ADA,ABCC3,ADSS,ARHGEF7,ALDH1A1,ABCD1,AKT2,BIN1,AMPD3,ARF5,ARF6,ARRB1,ARRB2,ARL1,ARHGAP6,ARHGAP5,ARHGAP4,ARHGAP1,RHOG,RHOB,ASNA1,ATP1A1,ATP5C1,ATP6V0D1,ATP5A1,ATP2A2,ATP6V0C,ATP5J,RAB3GAP2,ATP6V1C1,PIP5K1A,TBC1D10B,SMARCA5,PKP4,ENTPD1,RIC8A,ATL3,CDC42,CDA,TBC1D5,DOCK4,PTPLAD1,CHN1,ACAP1,RAB14,GIT2,ATP6V1H,PSMD6,TBC1D4,MFN2,CRK,GMPR2,ARFRP1,SNX9,EFTUD1,RAB11B,LRRK2,DDX5,DD…
GO: Biological Process	GO:0009205	purine ribonucleoside triphosphate metabolic process	1.965e-34	261	637	ARFGAP3,IQGAP1,ACTC1,GNL3,ABCC3,ADSS,AK4,AK2,AK1,ARHGEF7,ALDH1A1,ABCD1,AKT2,ALDOA,BIN1,ARF5,ARF6,ARRB1,ARRB2,ARL1,ARHGAP6,ARHGAP5,ARHGAP4,ARHGAP1,RHOG,RHOB,ASNA1,ATP1A3,ATP1A1,ATP1A2,ATP5C1,ATP6V0D1,ATP5A1,ATP2B4,ATP2A3,ATP2A2,ATP2B1,ATP1B1,ATP6V1B1,ATP6V1B2,ATP6V0C,ATP5J,RAB3GAP2,ATP6V1C1,PIP5K1A,TBC1D10B,SMARCA5,PKP4,ENTPD1,RIC8A,ATL3,CDC42,TBC1D5,DOCK4,PTPLAD1,CHN1,ACAP1,RAB14,GIT2,ATP6V1H,PSM…
GO: Biological Process	GO:0009199	ribonucleoside triphosphate metabolic process	2.083e-34	263	644	ARFGAP3,IQGAP1,ACTC1,GNL3,ABCC3,ADSS,AK4,AK2,AK1,ARHGEF7,ALDH1A1,ABCD1,AKT2,ALDOA,BIN1,ARF5,ARF6,ARRB1,ARRB2,ARL1,ARHGAP6,ARHGAP5,ARHGAP4,ARHGAP1,RHOG,RHOB,ASNA1,ATP1A3,ATP1A1,ATP1A2,ATP5C1,ATP6V0D1,ATP5A1,ATP2B4,ATP2A3,ATP2A2,ATP2B1,ATP1B1,ATP6V1B1,ATP6V1B2,ATP6V0C,ATP5J,RAB3GAP2,ATP6V1C1,PIP5K1A,TBC1D10B,SMARCA5,PKP4,ENTPD1,RIC8A,ATL3,CDC42,TBC1D5,DOCK4,PTPLAD1,CHN1,ACAP1,RAB14,GIT2,ATP6V1H,PSM…
GO: Biological Process	GO:0072523	purine-containing compound catabolic process	3.399e-34	264	649	ARFGAP3,IQGAP1,ACTC1,GNL3,ADA,ABCC3,ADSS,ARHGEF7,ALDH1A1,ABCD1,AKT2,BIN1,AMPD3,ARF5,ARF6,ARRB1,ARRB2,ARL1,ARHGAP6,ARHGAP5,ARHGAP4,ARHGAP1,RHOG,RHOB,ASNA1,ATP1A1,ATP5C1,ATP6V0D1,RGN,ATP5A1,ATP2A2,ATP6V0C,ATP5J,RAB3GAP2,ATP6V1C1,PIP5K1A,TBC1D10B,SMARCA5,PKP4,CAT,ENTPD1,RIC8A,ATL3,CDC42,TBC1D5,DOCK4,PTPLAD1,CHN1,ACAP1,RAB14,GIT2,ATP6V1H,PSMD6,CNN3,TBC1D4,MFN2,CRK,GMPR2,DNAJB6,ARFRP1,SNX9,EFTUD1,RAB1…
GO: Biological Process	GO:0006152	purine nucleoside catabolic process	5.739e-34	247	593	ARFGAP3,IQGAP1,ACTC1,GNL3,ADA,ABCC3,ADSS,ARHGEF7,ALDH1A1,ABCD1,AKT2,BIN1,AMPD3,ARF5,ARF6,ARRB1,ARRB2,ARL1,ARHGAP6,ARHGAP5,ARHGAP4,ARHGAP1,RHOG,RHOB,ASNA1,ATP1A1,ATP5C1,ATP6V0D1,ATP5A1,ATP2A2,ATP6V0C,ATP5J,RAB3GAP2,ATP6V1C1,PIP5K1A,TBC1D10B,SMARCA5,PKP4,ENTPD1,RIC8A,ATL3,CDC42,TBC1D5,DOCK4,PTPLAD1,CHN1,ACAP1,RAB14,GIT2,ATP6V1H,PSMD6,TBC1D4,MFN2,CRK,GMPR2,ARFRP1,SNX9,EFTUD1,RAB11B,LRRK2,DDX5,DDX3X,…
GO: Biological Process	GO:0046130	purine ribonucleoside catabolic process	5.739e-34	247	593	ARFGAP3,IQGAP1,ACTC1,GNL3,ADA,ABCC3,ADSS,ARHGEF7,ALDH1A1,ABCD1,AKT2,BIN1,AMPD3,ARF5,ARF6,ARRB1,ARRB2,ARL1,ARHGAP6,ARHGAP5,ARHGAP4,ARHGAP1,RHOG,RHOB,ASNA1,ATP1A1,ATP5C1,ATP6V0D1,ATP5A1,ATP2A2,ATP6V0C,ATP5J,RAB3GAP2,ATP6V1C1,PIP5K1A,TBC1D10B,SMARCA5,PKP4,ENTPD1,RIC8A,ATL3,CDC42,TBC1D5,DOCK4,PTPLAD1,CHN1,ACAP1,RAB14,GIT2,ATP6V1H,PSMD6,TBC1D4,MFN2,CRK,GMPR2,ARFRP1,SNX9,EFTUD1,RAB11B,LRRK2,DDX5,DDX3X,…
GO: Biological Process	GO:0006195	purine nucleotide catabolic process	5.974e-34	262	644	ARFGAP3,IQGAP1,ACTC1,GNL3,ADA,ABCC3,ADSS,ARHGEF7,ALDH1A1,ABCD1,AKT2,BIN1,AMPD3,ARF5,ARF6,ARRB1,ARRB2,ARL1,ARHGAP6,ARHGAP5,ARHGAP4,ARHGAP1,RHOG,RHOB,ASNA1,ATP1A1,ATP5C1,ATP6V0D1,RGN,ATP5A1,ATP2A2,ATP6V0C,ATP5J,RAB3GAP2,ATP6V1C1,PIP5K1A,TBC1D10B,SMARCA5,PKP4,CAT,ENTPD1,RIC8A,ATL3,CDC42,TBC1D5,DOCK4,PTPLAD1,CHN1,ACAP1,RAB14,GIT2,ATP6V1H,PSMD6,CNN3,TBC1D4,MFN2,CRK,GMPR2,DNAJB6,ARFRP1,SNX9,EFTUD1,RAB1…
GO: Biological Process	GO:0009057	macromolecule catabolic process	9.334e-34	338	914	FBXO4,FBXW8,FBXO6,PABPC4,MBD4,MTMR2,AGL,AKT1,SQSTM1,CDC16,AMBP,APAF1,APOB,APOE,USP13,ARSB,ARRB1,ARRB2,BUB3,HGS,ATM,AIFM1,USP8,USP10,USP14,FBXO7,BGN,ARIH1,BAX,HECTD1,USP11,USP9X,FOXL2,CAPN1,CAST,CALM3,UPF2,CUL4B,CUL4A,CUL3,CUL2,CUL1,HERC4,GGA1,CASP8,PNPT1,CDC23,CNOT10,CDK2,CDC42,CDK1,CD44,EIF4A3,DERL1,CHI3L1,CHIT1,USP34,CDKN1B,STT3B,CUL7,RNF40,PSMD6,USP15,THRAP3,CLU,SUFU,RBM8A,TPP1,HDAC6,HUWE1,CTB…
GO: Biological Process	GO:0009146	purine nucleoside triphosphate catabolic process	3.769e-33	242	582	ARFGAP3,IQGAP1,ACTC1,GNL3,ADA,ABCC3,ADSS,ARHGEF7,ALDH1A1,ABCD1,AKT2,BIN1,ARF5,ARF6,ARRB1,ARRB2,ARL1,ARHGAP6,ARHGAP5,ARHGAP4,ARHGAP1,RHOG,RHOB,ASNA1,ATP1A1,ATP5C1,ATP6V0D1,ATP5A1,ATP2A2,ATP6V0C,ATP5J,RAB3GAP2,ATP6V1C1,PIP5K1A,TBC1D10B,SMARCA5,PKP4,ENTPD1,RIC8A,ATL3,CDC42,TBC1D5,DOCK4,PTPLAD1,CHN1,ACAP1,RAB14,GIT2,ATP6V1H,PSMD6,TBC1D4,MFN2,CRK,ARFRP1,SNX9,EFTUD1,RAB11B,LRRK2,DDX5,DDX3X,EFTUD2,TBC1D…
GO: Biological Process	GO:0042454	ribonucleoside catabolic process	4.74e-33	248	603	ARFGAP3,IQGAP1,ACTC1,GNL3,ADA,ABCC3,ADSS,ARHGEF7,ALDH1A1,ABCD1,AKT2,BIN1,AMPD3,ARF5,ARF6,ARRB1,ARRB2,ARL1,ARHGAP6,ARHGAP5,ARHGAP4,ARHGAP1,RHOG,RHOB,ASNA1,ATP1A1,ATP5C1,ATP6V0D1,ATP5A1,ATP2A2,ATP6V0C,ATP5J,RAB3GAP2,ATP6V1C1,PIP5K1A,TBC1D10B,SMARCA5,PKP4,ENTPD1,RIC8A,ATL3,CDC42,CDA,TBC1D5,DOCK4,PTPLAD1,CHN1,ACAP1,RAB14,GIT2,ATP6V1H,PSMD6,TBC1D4,MFN2,CRK,GMPR2,ARFRP1,SNX9,EFTUD1,RAB11B,LRRK2,DDX5,DD…
GO: Biological Process	GO:0009143	nucleoside triphosphate catabolic process	1.198e-32	243	589	ARFGAP3,IQGAP1,ACTC1,GNL3,ADA,ABCC3,ADSS,ARHGEF7,ALDH1A1,ABCD1,AKT2,BIN1,ARF5,ARF6,ARRB1,ARRB2,ARL1,ARHGAP6,ARHGAP5,ARHGAP4,ARHGAP1,RHOG,RHOB,ASNA1,ATP1A1,ATP5C1,ATP6V0D1,ATP5A1,ATP2A2,ATP6V0C,ATP5J,RAB3GAP2,ATP6V1C1,PIP5K1A,TBC1D10B,SMARCA5,PKP4,ENTPD1,RIC8A,ATL3,CDC42,TBC1D5,DOCK4,PTPLAD1,CHN1,ACAP1,RAB14,GIT2,ATP6V1H,PSMD6,TBC1D4,MFN2,CRK,ARFRP1,SNX9,EFTUD1,RAB11B,LRRK2,DDX5,DDX3X,EFTUD2,TBC1D…
GO: Biological Process	GO:0009154	purine ribonucleotide catabolic process	1.652e-32	248	607	ARFGAP3,IQGAP1,ACTC1,GNL3,ABCC3,ADSS,ARHGEF7,ALDH1A1,ABCD1,AKT2,BIN1,AMPD3,ARF5,ARF6,ARRB1,ARRB2,ARL1,ARHGAP6,ARHGAP5,ARHGAP4,ARHGAP1,RHOG,RHOB,ASNA1,ATP1A1,ATP5C1,ATP6V0D1,ATP5A1,ATP2A2,ATP6V0C,ATP5J,RAB3GAP2,ATP6V1C1,PIP5K1A,TBC1D10B,SMARCA5,PKP4,ENTPD1,RIC8A,ATL3,CDC42,TBC1D5,DOCK4,PTPLAD1,CHN1,ACAP1,RAB14,GIT2,ATP6V1H,PSMD6,TBC1D4,MFN2,CRK,GMPR2,ARFRP1,SNX9,EFTUD1,RAB11B,LRRK2,DDX5,DDX3X,EFTU…
GO: Biological Process	GO:0009207	purine ribonucleoside triphosphate catabolic process	1.722e-32	240	580	ARFGAP3,IQGAP1,ACTC1,GNL3,ABCC3,ADSS,ARHGEF7,ALDH1A1,ABCD1,AKT2,BIN1,ARF5,ARF6,ARRB1,ARRB2,ARL1,ARHGAP6,ARHGAP5,ARHGAP4,ARHGAP1,RHOG,RHOB,ASNA1,ATP1A1,ATP5C1,ATP6V0D1,ATP5A1,ATP2A2,ATP6V0C,ATP5J,RAB3GAP2,ATP6V1C1,PIP5K1A,TBC1D10B,SMARCA5,PKP4,ENTPD1,RIC8A,ATL3,CDC42,TBC1D5,DOCK4,PTPLAD1,CHN1,ACAP1,RAB14,GIT2,ATP6V1H,PSMD6,TBC1D4,MFN2,CRK,ARFRP1,SNX9,EFTUD1,RAB11B,LRRK2,DDX5,DDX3X,EFTUD2,TBC1D17,L…
GO: Biological Process	GO:0009261	ribonucleotide catabolic process	2.25e-32	248	608	ARFGAP3,IQGAP1,ACTC1,GNL3,ABCC3,ADSS,ARHGEF7,ALDH1A1,ABCD1,AKT2,BIN1,AMPD3,ARF5,ARF6,ARRB1,ARRB2,ARL1,ARHGAP6,ARHGAP5,ARHGAP4,ARHGAP1,RHOG,RHOB,ASNA1,ATP1A1,ATP5C1,ATP6V0D1,ATP5A1,ATP2A2,ATP6V0C,ATP5J,RAB3GAP2,ATP6V1C1,PIP5K1A,TBC1D10B,SMARCA5,PKP4,ENTPD1,RIC8A,ATL3,CDC42,TBC1D5,DOCK4,PTPLAD1,CHN1,ACAP1,RAB14,GIT2,ATP6V1H,PSMD6,TBC1D4,MFN2,CRK,GMPR2,ARFRP1,SNX9,EFTUD1,RAB11B,LRRK2,DDX5,DDX3X,EFTU…
GO: Biological Process	GO:0009203	ribonucleoside triphosphate catabolic process	2.367e-32	240	581	ARFGAP3,IQGAP1,ACTC1,GNL3,ABCC3,ADSS,ARHGEF7,ALDH1A1,ABCD1,AKT2,BIN1,ARF5,ARF6,ARRB1,ARRB2,ARL1,ARHGAP6,ARHGAP5,ARHGAP4,ARHGAP1,RHOG,RHOB,ASNA1,ATP1A1,ATP5C1,ATP6V0D1,ATP5A1,ATP2A2,ATP6V0C,ATP5J,RAB3GAP2,ATP6V1C1,PIP5K1A,TBC1D10B,SMARCA5,PKP4,ENTPD1,RIC8A,ATL3,CDC42,TBC1D5,DOCK4,PTPLAD1,CHN1,ACAP1,RAB14,GIT2,ATP6V1H,PSMD6,TBC1D4,MFN2,CRK,ARFRP1,SNX9,EFTUD1,RAB11B,LRRK2,DDX5,DDX3X,EFTUD2,TBC1D17,L…
GO: Biological Process	GO:0065003	macromolecular complex assembly	2.784e-32	392	1129	ABCA1,ACACA,ACADM,ACADS,ACADL,NAPG,ACAT1,NAPA,SNAP23,RIPK1,ACTN2,TRADD,ADD1,MBD2,SKAP2,ADSL,PRPF31,AP2B1,MTMR2,AP1B1,SQSTM1,AHSG,AIF1,ALDH1A1,ALAD,ALDOC,ALDOA,SPAG9,ANXA5,APAF1,NFS1,APOB,APOA4,APOA2,APOE,APOC3,APCS,LIMD1,WASL,ARF6,ARHGAP6,ZW10,AIFM1,SART1,PICALM,BCS1L,BID,BAX,COG4,NCK2,C1QBP,CAPG,CAPZA1,CAPZA2,IKBKAP,KCNAB2,CALR,PIAS1,LSM14A,SMARCA5,CAV1,CAPZB,CASP8,CAT,PNPT1,EIF3D,DGAT1,AHCTF1,S…
GO: Biological Process	GO:0044764	multi-organism cellular process	1.959e-31	275	709	BANF1,RIPK1,ADAR,RNGTT,RNMT,AP1M1,AP1G2,AP1S2,AP2B1,AP1B1,AP2A2,AP2A1,AP1G1,BIN1,AMBP,ANPEP,SLC25A4,SLC25A5,SLC25A6,APOA2,SMC3,ATP6V0C,BAX,BCL2,C1QBP,THOC5,CUL4A,CUL2,CUL1,CAV1,RAE1,CASP8,NELFB,CD81,CDK13,DERL1,NELFCD,CDK9,THOC6,ELMO1,NUPL1,CUL7,ATP6V1H,PSMD6,C14orf166,NUP153,AP2M1,NUP35,PDCD6IP,CREBBP,THOC1,COPB1,CTBP2,CTBP1,NUP37,PSMD14,PSME3,ALYREF,DDB1,VAPB,DDX5,DDX3X,DAG1,NLRX1,DYNC1I2,DLG1,…
GO: Biological Process	GO:0016032	viral reproduction	2.261e-31	274	706	BANF1,RIPK1,ADAR,RNGTT,RNMT,AP1M1,AP1G2,AP1S2,AP2B1,AP1B1,AP2A2,AP2A1,AP1G1,BIN1,AMBP,ANPEP,SLC25A4,SLC25A5,SLC25A6,APOA2,ATP6V0C,BAX,BCL2,C1QBP,THOC5,CUL4A,CUL2,CUL1,CAV1,RAE1,CASP8,NELFB,CD81,CDK13,DERL1,NELFCD,CDK9,THOC6,ELMO1,NUPL1,CUL7,ATP6V1H,PSMD6,C14orf166,NUP153,AP2M1,NUP35,PDCD6IP,CREBBP,THOC1,COPB1,CTBP2,CTBP1,NUP37,PSMD14,PSME3,ALYREF,DDB1,VAPB,DDX5,DDX3X,DAG1,NLRX1,DYNC1I2,DLG1,NMT2,…
GO: Biological Process	GO:0072521	purine-containing compound metabolic process	3.052e-31	335	927	ARFGAP3,ABCA1,IQGAP1,ACACA,ACTC1,GNL3,ADA,ADCY3,ABCC3,ADK,ADSL,ADSS,ADSSL1,AK4,AK2,AK1,ARHGEF7,ALDH1A1,ABCD1,AKT2,ALDOA,GMPS,BIN1,AMPD3,PAPSS2,PAPSS1,AMPD2,APOE,ARF5,ARF6,APRT,ARRB1,ARRB2,ARL1,ARHGAP6,ARHGAP5,ARHGAP4,ARHGAP1,RHOG,RHOB,ASNA1,ATP1A3,ATP1A1,ATP1A2,ATIC,ATP5C1,ATP6V0D1,RGN,ATP5A1,ATP2B4,ATP2A3,ATP2A2,ATP2B1,ATP1B1,ATP6V1B1,ATP6V1B2,ATP6V0C,ATP5J,RAB3GAP2,ATP6V1C1,PIP5K1A,TBC1D10B,SMA…
GO: Biological Process	GO:0070727	cellular macromolecule localization	3.084e-31	363	1031	ARFGAP3,NAPG,NAPA,ACTN2,ADAR,AP3D1,PARP1,ADRBK2,AP1M1,AP1G2,AP1S2,AP2B1,AP1B1,AP2A2,AP2A1,AP1G1,AGT,AKT1,MCM3AP,AKT2,ANK2,TIMM13,AIP,ANK3,SLC25A6,ARCN1,WASL,ARF6,ARL1,BUB3,RHOG,ASPH,ARHGEF2,ZW10,HGS,RAB3GAP2,SUN2,SAMM50,CLTCL1,BID,BAX,NIPBL,PIP5K1A,STX7,FZD1,CALR,CASK,AP3B1,CAV1,GGA1,TOR1AIP1,SCARB2,SPCS3,LAMTOR3,AKR1C3,STX10,STX11,SIN3A,CDH1,CDC42,CDK1,CD74,USO1,DERL1,ZFYVE16,SNX17,NCKIPSD,C2CD5…
GO: Biological Process	GO:0006163	purine nucleotide metabolic process	1.189e-30	322	885	ARFGAP3,ABCA1,IQGAP1,ACACA,ACTC1,GNL3,ADA,ADCY3,ABCC3,ADK,ADSL,ADSS,ADSSL1,AK4,AK2,AK1,ARHGEF7,ALDH1A1,ABCD1,AKT2,ALDOA,GMPS,BIN1,AMPD3,PAPSS2,PAPSS1,AMPD2,APOE,ARF5,ARF6,APRT,ARRB1,ARRB2,ARL1,ARHGAP6,ARHGAP5,ARHGAP4,ARHGAP1,RHOG,RHOB,ASNA1,ATP1A3,ATP1A1,ATP1A2,ATIC,ATP5C1,ATP6V0D1,RGN,ATP5A1,ATP2B4,ATP2A3,ATP2A2,ATP2B1,ATP1B1,ATP6V1B1,ATP6V1B2,ATP6V0C,ATP5J,RAB3GAP2,ATP6V1C1,PIP5K1A,TBC1D10B,SMA…
GO: Biological Process	GO:0034613	cellular protein localization	1.216e-30	360	1026	ARFGAP3,NAPG,NAPA,ACTN2,ADAR,AP3D1,PARP1,ADRBK2,AP1M1,AP1G2,AP1S2,AP2B1,AP1B1,AP2A2,AP2A1,AP1G1,AGT,AKT1,MCM3AP,AKT2,ANK2,TIMM13,AIP,ANK3,SLC25A6,ARCN1,WASL,ARF6,ARL1,BUB3,RHOG,ASPH,ARHGEF2,ZW10,HGS,RAB3GAP2,SUN2,SAMM50,CLTCL1,BID,BAX,NIPBL,PIP5K1A,STX7,FZD1,CALR,CASK,AP3B1,CAV1,GGA1,TOR1AIP1,SCARB2,SPCS3,LAMTOR3,AKR1C3,STX10,STX11,SIN3A,CDH1,CDC42,CDK1,CD74,USO1,DERL1,ZFYVE16,SNX17,NCKIPSD,C2CD5…
GO: Biological Process	GO:0006886	intracellular protein transport	1.591e-29	283	754	ARFGAP3,NAPG,NAPA,ADAR,AP3D1,PARP1,ADRBK2,AP1M1,AP1G2,AP1S2,AP2B1,AP1B1,AP2A2,AP2A1,AP1G1,AGT,AKT1,MCM3AP,ANK2,TIMM13,AIP,ANK3,SLC25A6,ARCN1,ASPH,ARHGEF2,HGS,RAB3GAP2,SAMM50,CLTCL1,BID,PIP5K1A,STX7,FZD1,CALR,CASK,AP3B1,GGA1,SCARB2,SPCS3,AKR1C3,STX10,STX11,CDH1,CDC42,CDK1,CD74,USO1,DERL1,ZFYVE16,SNX17,NCKIPSD,G3BP2,NOP58,SEC24D,TOMM70A,AP2M1,MFN2,SUFU,CLTA,CLTC,TOM1,PDCD6,HDAC6,SCAMP3,COPA,COPB1,A…
GO: Biological Process	GO:0019693	ribose phosphate metabolic process	4.852e-29	312	864	ARFGAP3,ABCA1,IQGAP1,ACACA,ACTC1,GNL3,ADCY3,ABCC3,ADK,ADSL,ADSS,ADSSL1,AK4,AK2,AK1,ARHGEF7,ALDH1A1,ABCD1,AKT2,ALDOA,GMPS,BIN1,AMPD3,PAPSS2,PAPSS1,AMPD2,APOE,ARF5,ARF6,APRT,ARRB1,ARRB2,ARL1,ARHGAP6,ARHGAP5,ARHGAP4,ARHGAP1,RHOG,RHOB,ASNA1,ATP1A3,ATP1A1,ATP1A2,ATIC,ATP5C1,ATP6V0D1,ATP5A1,ATP2B4,ATP2A3,ATP2A2,ATP2B1,ATP1B1,ATP6V1B1,ATP6V1B2,ATP6V0C,ATP5J,RAB3GAP2,ATP6V1C1,PIP5K1A,TBC1D10B,SMARCA5,PPC…
GO: Biological Process	GO:0009259	ribonucleotide metabolic process	1.98e-28	309	859	ARFGAP3,ABCA1,IQGAP1,ACACA,ACTC1,GNL3,ADCY3,ABCC3,ADK,ADSL,ADSS,ADSSL1,AK4,AK2,AK1,ARHGEF7,ALDH1A1,ABCD1,AKT2,ALDOA,GMPS,BIN1,AMPD3,PAPSS2,PAPSS1,AMPD2,APOE,ARF5,ARF6,APRT,ARRB1,ARRB2,ARL1,ARHGAP6,ARHGAP5,ARHGAP4,ARHGAP1,RHOG,RHOB,ASNA1,ATP1A3,ATP1A1,ATP1A2,ATIC,ATP5C1,ATP6V0D1,ATP5A1,ATP2B4,ATP2A3,ATP2A2,ATP2B1,ATP1B1,ATP6V1B1,ATP6V1B2,ATP6V0C,ATP5J,RAB3GAP2,ATP6V1C1,PIP5K1A,TBC1D10B,SMARCA5,PPC…
GO: Biological Process	GO:0009150	purine ribonucleotide metabolic process	4.373e-28	304	844	ARFGAP3,ABCA1,IQGAP1,ACACA,ACTC1,GNL3,ADCY3,ABCC3,ADK,ADSL,ADSS,ADSSL1,AK4,AK2,AK1,ARHGEF7,ALDH1A1,ABCD1,AKT2,ALDOA,GMPS,BIN1,AMPD3,PAPSS2,PAPSS1,AMPD2,APOE,ARF5,ARF6,APRT,ARRB1,ARRB2,ARL1,ARHGAP6,ARHGAP5,ARHGAP4,ARHGAP1,RHOG,RHOB,ASNA1,ATP1A3,ATP1A1,ATP1A2,ATIC,ATP5C1,ATP6V0D1,ATP5A1,ATP2B4,ATP2A3,ATP2A2,ATP2B1,ATP1B1,ATP6V1B1,ATP6V1B2,ATP6V0C,ATP5J,RAB3GAP2,ATP6V1C1,PIP5K1A,TBC1D10B,SMARCA5,PPC…
GO: Biological Process	GO:0051336	regulation of hydrolase activity	6.685e-28	310	868	A2M,SERPINA3,ARFGAP3,IQGAP1,ACADVL,RIPK1,FAM162A,TRADD,ADCY3,ADD1,ADRBK1,AGT,AKT1,ARHGEF7,ALDH1A1,AKT2,BIN1,AMBP,AIP,APAF1,APOA4,APOA2,APOC3,APOC2,ARRB1,ARRB2,ARL1,ARHGAP6,ARHGAP5,ARHGAP4,ARHGAP1,RHOG,SERPINC1,AIFM1,ATP6V0D1,RGN,USP14,RAB3GAP2,PRDX5,BAK1,BAX,PIP5K1A,FOXL2,RECK,SERPING1,C6,C9,TBC1D10B,CAST,CALM3,CALR,SERPINA6,SERPINH1,PKP4,CAV1,CASP1,CASP7,CASP8,POT1,RIC8A,CDH1,CD44,TBC1D5,DOCK4,P…
GO: Biological Process	GO:0007010	cytoskeleton organization	2.929e-27	312	882	ABR,AK7,ACTC1,ACTG1,ACTN1,ACTN4,ACTN2,ADD1,AP1G1,AKT1,AIF1,ALDOA,APOE,LIMD1,WASL,ARF6,ARRB1,ZMYM3,ARHGAP6,ARHGAP4,ARHGDIB,BUB3,RHOG,ARHGEF2,ZW10,SMC3,SUN2,BAX,SMC1A,BCL2,PIP5K1A,NCK2,DST,C21orf2,FMNL1,CAPG,CAPZA1,CAPZA2,CALD1,CALR,CDC42BPA,CUL3,CAV1,CAPZB,OFD1,NEK7,CDK2,CLIC4,CDC42,CDK1,KANK2,EVL,LIMA1,CHD3,NCKIPSD,ARHGEF11,CDKN1B,ELMO1,CETN2,CKAP5,NEDD1,CFL2,CNN3,CNP,CNN1,TPPP3,IQSEC1,CLTC,HDAC6…
GO: Biological Process	GO:1901068	guanosine-containing compound metabolic process	5.823e-27	197	475	ARFGAP3,IQGAP1,GNL3,ADSS,AK4,ARHGEF7,ALDH1A1,AKT2,GMPS,BIN1,ARF5,ARF6,ARRB1,ARRB2,ARL1,ARHGAP6,ARHGAP5,ARHGAP4,ARHGAP1,RHOG,RHOB,RAB3GAP2,PIP5K1A,TBC1D10B,PKP4,RIC8A,ATL3,CDC42,TBC1D5,DOCK4,PTPLAD1,CHN1,ACAP1,RAB14,GIT2,TBC1D4,MFN2,CRK,GMPR2,ARFRP1,SNX9,EFTUD1,RAB11B,LRRK2,EFTUD2,TBC1D17,RAB9A,DNM2,DNM1,DGUOK,ARHGEF6,TUBAL3,RAB8B,RAB3D,DOCK1,ARHGEF10,EIF2S3,EIF5,EEF2,RHOT2,PTK2B,TMED2,GNB4,ERBB2,…
GO: Biological Process	GO:0030029	actin filament-based process	7.971e-27	212	527	ABR,ACTC1,ACTG1,ACTN1,ACTN4,ACTN2,ADD1,AIF1,ALDOA,ANK2,WASL,ARF6,ARRB1,ARHGAP6,ARHGDIB,RHOG,ARHGEF2,ATP1A1,ATP1A2,SUN2,BCL2,PIP5K1A,MYL6B,NCK2,FMNL1,CAPG,CAPZA1,CAPZA2,CALD1,CALR,CDC42BPA,CUL3,CAPZB,CDC42,KANK2,EVL,LIMA1,ARHGEF11,ELMO1,CFL2,CNN3,CNN1,IQSEC1,ABI1,CRK,ARPC2,ACTR2,ACTR3,ARPC3,ARPC1B,ARPC4,WASF2,SORBS3,ABI2,CSRP1,PDLIM7,DAPK3,DBN1,TRIP10,SLC9A3R1,DIAPH1,DIAPH2,DLG1,MYH14,DMD,DES,INPP…
GO: Biological Process	GO:0051701	interaction with host	2.745e-26	180	423	BANF1,RIPK1,RNGTT,AP1M1,AP1G2,ALB,BIN1,AMBP,ANPEP,SLC25A4,SLC25A5,SLC25A6,APOA2,ATP6V0D1,ATP6V1B1,ATP6V1B2,ATP6V0C,ATP6V0A1,ATP6V1E1,ATP6V1C1,BAX,C1QBP,C9,THOC5,CUL4A,CUL2,CUL1,CAV1,CASP8,CD81,CDK13,DERL1,THOC6,CUL7,ATP6V1H,C14orf166,NUP153,PDCD6IP,CREBBP,THOC1,COPB1,CTBP1,ATP6V1D,ALYREF,DDB1,VAPB,DDX3X,DAG1,NLRX1,CYBB,DYNC1I2,DLG1,NMT2,EIF4G1,FBLN1,SF3B2,COPS6,FDPS,ETF1,SRCAP,ATF7,SYNCRIP,VPS28,…
GO: Biological Process	GO:0019048	virus-host interaction	3.699e-26	166	378	BANF1,RIPK1,RNGTT,AP1M1,AP1G2,BIN1,AMBP,ANPEP,SLC25A4,SLC25A5,SLC25A6,APOA2,ATP6V0C,BAX,C1QBP,THOC5,CUL4A,CUL2,CUL1,CAV1,CASP8,CD81,CDK13,DERL1,THOC6,CUL7,ATP6V1H,C14orf166,NUP153,PDCD6IP,CREBBP,THOC1,COPB1,CTBP1,ALYREF,DDB1,VAPB,DDX3X,DAG1,NLRX1,DYNC1I2,DLG1,NMT2,EIF4G1,FBLN1,SF3B2,COPS6,FDPS,ETF1,SRCAP,ATF7,SYNCRIP,VPS28,NXF1,DYNC1LI1,GNB2L1,RTN3,TRIM22,GTF2B,GTF2E1,HCK,HCFC1,IVNS1ABP,F11R,CARM…
GO: Biological Process	GO:0022415	viral reproductive process	5.645e-26	217	551	BANF1,RIPK1,ADAR,RNGTT,AP1M1,AP1G2,BIN1,AMBP,ANPEP,SLC25A4,SLC25A5,SLC25A6,APOA2,ATP6V0C,BAX,BCL2,C1QBP,THOC5,CUL4A,CUL2,CUL1,CAV1,CASP8,NELFB,CD81,CDK13,DERL1,NELFCD,CDK9,THOC6,CUL7,ATP6V1H,C14orf166,NUP153,PDCD6IP,CREBBP,THOC1,COPB1,CTBP2,CTBP1,ALYREF,DDB1,VAPB,DDX5,DDX3X,DAG1,NLRX1,DYNC1I2,DLG1,NMT2,RSF1,INPP5K,EIF4G1,FBLN1,SF3B2,COPS6,FDPS,ETF1,SRCAP,SUPT16H,ATF7,SYNCRIP,VPS28,NXF1,DYNC1LI1,G…
GO: Biological Process	GO:0070271	protein complex biogenesis	6.518e-26	309	885	ACACA,ACADM,ACADS,ACADL,NAPG,ACAT1,NAPA,SNAP23,RIPK1,ACTN2,TRADD,ADD1,MBD2,SKAP2,ADSL,AP2B1,MTMR2,AP1B1,SQSTM1,AHSG,AIF1,ALDH1A1,ALAD,ALDOC,ALDOA,SPAG9,ANXA5,APAF1,NFS1,APCS,WASL,ARF6,ARHGAP6,ZW10,AIFM1,PICALM,BCS1L,BID,BAX,COG4,NCK2,CAPG,CAPZA1,CAPZA2,IKBKAP,KCNAB2,CALR,CAV1,CAPZB,CASP8,CAT,PNPT1,AHCTF1,GEMIN5,ATL3,CDH1,CDC42,SEPT7,CDA,CDK1,CD74,BCLAF1,EVL,CDKN1B,CUTA,COL1A1,MPP6,CLU,CPT1A,HDAC6…
GO: Biological Process	GO:0048193	Golgi vesicle transport	1.615e-25	106	198	NAPG,NAPA,SNAP23,GBF1,AP1M1,AP1S2,AP1B1,AP2A1,AP1G1,ANK3,ARCN1,ARRB1,ARL1,ZW10,COG4,STX7,CUL3,STX10,ATL3,USO1,RAB14,SEC16A,SEC24D,DOPEY2,VPS29,CLTA,GOLGA5,CLTC,SCAMP3,COPA,COPB1,ARFRP1,TRAPPC4,CSK,COPB2,DNM2,COG1,GOSR1,GOSR2,SEC24C,CLINT1,PUM1,ACSL3,TMED10,TMED2,SEC24A,RER1,RAB31,LYPLA1,SEC23A,SEC23B,COG5,SAR1B,SEC24B,HTT,YKT6,EXOC5,ARFGEF2,HSPA8,LYPLAL1,COPE,TMX1,COPG2,TXNDC5,LMAN2L,COG6,LMAN1,L…
GO: Biological Process	GO:0044265	cellular macromolecule catabolic process	1.919e-25	262	716	FBXO4,FBXW8,FBXO6,PABPC4,MBD4,AKT1,SQSTM1,CDC16,APAF1,APOB,APOE,USP13,ARRB1,ARRB2,BUB3,ATM,AIFM1,USP8,USP10,USP14,FBXO7,ARIH1,BAX,HECTD1,USP11,USP9X,FOXL2,UPF2,CUL4B,CUL4A,CUL3,CUL2,CUL1,HERC4,CASP8,PNPT1,CDC23,CNOT10,CDK2,CDK1,EIF4A3,DERL1,USP34,STT3B,CUL7,RNF40,PSMD6,USP15,THRAP3,CLU,SUFU,RBM8A,HDAC6,HUWE1,UCHL5,UBR5,PSMD14,PSME3,PCYOX1,DDB1,LRRK2,DDX6,UBE2L6,HECTD3,DAB2,TRIP12,CYLD,TBL1XR1,UBE…
GO: Biological Process	GO:0006461	protein complex assembly	2.113e-25	307	883	ACACA,ACADM,ACADS,ACADL,NAPG,ACAT1,NAPA,SNAP23,RIPK1,ACTN2,TRADD,ADD1,MBD2,SKAP2,ADSL,AP2B1,MTMR2,AP1B1,SQSTM1,AHSG,AIF1,ALDH1A1,ALAD,ALDOC,ALDOA,SPAG9,ANXA5,APAF1,NFS1,APCS,WASL,ARF6,ARHGAP6,ZW10,AIFM1,PICALM,BCS1L,BID,BAX,COG4,NCK2,CAPG,CAPZA1,CAPZA2,IKBKAP,KCNAB2,CALR,CAV1,CAPZB,CASP8,CAT,PNPT1,AHCTF1,GEMIN5,ATL3,CDH1,CDC42,SEPT7,CDA,CDK1,CD74,BCLAF1,EVL,CDKN1B,CUTA,COL1A1,MPP6,CLU,CPT1A,HDAC6…
GO: Biological Process	GO:0032268	regulation of cellular protein metabolic process	2.347e-25	432	1369	FBXO4,AARS,ABCF1,IQGAP1,NRP1,ACADVL,ACO1,RIPK1,ADAR,ADCY3,ADD1,NOC2L,ADRBK2,AGT,AKT1,SQSTM1,AIF1,EIF2B2,EIF2B5,EIF2B4,EIF2B3,AKT2,CDC16,SPAG9,APOA4,APOE,ARAF,RPS6KA4,AATF,ARRB1,ARRB2,BUB3,ATP6V0D1,USP14,BAK1,BAX,NIPBL,BCL2,NCK2,FZD1,C1QBP,C5,CALR,PIAS1,LSM14A,CUL1,CAV1,SPDYA,EIF3H,EIF3B,LAMTOR3,PRKD2,CDC23,CDK2,SIN3A,CDC42,CDK1,CD81,CD74,CD44,EIF4A3,CHI3L1,PTPLAD1,MLL4,CDK9,CDKN1B,CUL7,CCR1,TRMT6…
GO: Biological Process	GO:1901069	guanosine-containing compound catabolic process	4.429e-25	187	455	ARFGAP3,IQGAP1,GNL3,ADSS,ARHGEF7,ALDH1A1,AKT2,BIN1,ARF5,ARF6,ARRB1,ARRB2,ARL1,ARHGAP6,ARHGAP5,ARHGAP4,ARHGAP1,RHOG,RHOB,RAB3GAP2,PIP5K1A,TBC1D10B,PKP4,RIC8A,ATL3,CDC42,TBC1D5,DOCK4,PTPLAD1,CHN1,ACAP1,RAB14,GIT2,TBC1D4,MFN2,CRK,GMPR2,ARFRP1,SNX9,EFTUD1,RAB11B,LRRK2,EFTUD2,TBC1D17,RAB9A,DNM2,DNM1,ARHGEF6,TUBAL3,RAB8B,RAB3D,DOCK1,ARHGEF10,EIF2S3,EIF5,EEF2,RHOT2,PTK2B,TMED2,GNB4,ERBB2,EPHB3,SEPT9,MTO…
GO: Biological Process	GO:0046039	GTP metabolic process	6.465e-25	189	463	ARFGAP3,IQGAP1,GNL3,ADSS,AK4,ARHGEF7,ALDH1A1,AKT2,BIN1,ARF5,ARF6,ARRB1,ARRB2,ARL1,ARHGAP6,ARHGAP5,ARHGAP4,ARHGAP1,RHOG,RHOB,RAB3GAP2,PIP5K1A,TBC1D10B,PKP4,RIC8A,ATL3,CDC42,TBC1D5,DOCK4,PTPLAD1,CHN1,ACAP1,RAB14,GIT2,TBC1D4,MFN2,CRK,ARFRP1,SNX9,EFTUD1,RAB11B,LRRK2,EFTUD2,TBC1D17,RAB9A,DNM2,DNM1,ARHGEF6,TUBAL3,RAB8B,RAB3D,DOCK1,ARHGEF10,EIF2S3,EIF5,EEF2,RHOT2,PTK2B,TMED2,GNB4,ERBB2,EPHB3,SEPT9,MTOR,…
GO: Biological Process	GO:0030036	actin cytoskeleton organization	7.301e-25	188	460	ABR,ACTC1,ACTG1,ACTN1,ACTN4,ACTN2,ADD1,AIF1,ALDOA,WASL,ARF6,ARRB1,ARHGAP6,ARHGDIB,RHOG,ARHGEF2,BCL2,PIP5K1A,NCK2,FMNL1,CAPG,CAPZA1,CAPZA2,CALD1,CALR,CDC42BPA,CUL3,CAPZB,CDC42,KANK2,EVL,LIMA1,ARHGEF11,ELMO1,CFL2,CNN3,CNN1,IQSEC1,ABI1,CRK,ARPC2,ACTR2,ACTR3,ARPC3,ARPC1B,ARPC4,WASF2,SORBS3,ABI2,CSRP1,PDLIM7,DAPK3,DBN1,TRIP10,SLC9A3R1,DIAPH1,DIAPH2,DLG1,INPP5K,ROCK2,DPYSL3,CDC42BPB,DOCK2,EPB41,EPB41L2…
GO: Biological Process	GO:0006184	GTP catabolic process	2.196e-24	184	450	ARFGAP3,IQGAP1,GNL3,ADSS,ARHGEF7,ALDH1A1,AKT2,BIN1,ARF5,ARF6,ARRB1,ARRB2,ARL1,ARHGAP6,ARHGAP5,ARHGAP4,ARHGAP1,RHOG,RHOB,RAB3GAP2,PIP5K1A,TBC1D10B,PKP4,RIC8A,ATL3,CDC42,TBC1D5,DOCK4,PTPLAD1,CHN1,ACAP1,RAB14,GIT2,TBC1D4,MFN2,CRK,ARFRP1,SNX9,EFTUD1,RAB11B,LRRK2,EFTUD2,TBC1D17,RAB9A,DNM2,DNM1,ARHGEF6,TUBAL3,RAB8B,RAB3D,DOCK1,ARHGEF10,EIF2S3,EIF5,EEF2,RHOT2,PTK2B,TMED2,GNB4,ERBB2,EPHB3,SEPT9,MTOR,FGD3…
GO: Biological Process	GO:0071822	protein complex subunit organization	3.379e-24	337	1011	ACACA,ACADM,ACADS,ACADL,NAPG,ACAT1,NAPA,SNAP23,RIPK1,ACTN2,TRADD,ADD1,MBD2,SKAP2,ADSL,AP2B1,MTMR2,AP1B1,SQSTM1,AHSG,AIF1,ALDH1A1,ALAD,ALDOC,ALDOA,SPAG9,ANXA5,APAF1,NFS1,APCS,WASL,ARF6,ARHGAP6,ARHGEF2,ZW10,AIFM1,PICALM,BCS1L,BID,BAX,COG4,NCK2,CAPG,CAPZA1,CAPZA2,IKBKAP,KCNAB2,CALR,CAV1,CAPZB,CASP8,CAT,PNPT1,AHCTF1,GEMIN5,ATL3,CDH1,CDC42,SEPT7,CDA,CDK1,CD74,BCLAF1,EVL,LIMA1,CDKN1B,NEDD1,CFL2,CUTA,CO…
GO: Biological Process	GO:0044403	symbiosis, encompassing mutualism through parasitism	1.68e-23	187	467	BANF1,RIPK1,RNGTT,AP1M1,AP1G2,ALB,BIN1,AMBP,ANPEP,SLC25A4,SLC25A5,SLC25A6,APOA2,ATP6V0D1,ATP6V1B1,ATP6V1B2,ATP6V0C,ATP6V0A1,ATP6V1E1,ATP6V1C1,BAX,C1QBP,C9,THOC5,CUL4A,CUL2,CUL1,CAV1,CASP8,CD81,CDK13,DERL1,THOC6,CUL7,ATP6V1H,C14orf166,NUP153,PDCD6IP,CREBBP,THOC1,COPB1,CTBP1,ATP6V1D,ALYREF,DDB1,VAPB,DDX3X,DAG1,NLRX1,CYBB,DYNC1I2,DLG1,NMT2,INPP5K,EIF4G1,FBLN1,SF3B2,COPS6,FDPS,ETF1,SRCAP,ATF7,SYNCRIP…
GO: Biological Process	GO:0044419	interspecies interaction between organisms	1.68e-23	187	467	BANF1,RIPK1,RNGTT,AP1M1,AP1G2,ALB,BIN1,AMBP,ANPEP,SLC25A4,SLC25A5,SLC25A6,APOA2,ATP6V0D1,ATP6V1B1,ATP6V1B2,ATP6V0C,ATP6V0A1,ATP6V1E1,ATP6V1C1,BAX,C1QBP,C9,THOC5,CUL4A,CUL2,CUL1,CAV1,CASP8,CD81,CDK13,DERL1,THOC6,CUL7,ATP6V1H,C14orf166,NUP153,PDCD6IP,CREBBP,THOC1,COPB1,CTBP1,ATP6V1D,ALYREF,DDB1,VAPB,DDX3X,DAG1,NLRX1,CYBB,DYNC1I2,DLG1,NMT2,INPP5K,EIF4G1,FBLN1,SF3B2,COPS6,FDPS,ETF1,SRCAP,ATF7,SYNCRIP…
GO: Biological Process	GO:0006412	translation	3.274e-23	205	532	AARS,ABCF1,ACO1,PABPC4,RSL1D1,AKT1,EIF2B2,EIF2B5,EIF2S2,EIF2B4,EIF2B3,AKT2,AATF,BCL2,NCK2,MRPL49,C1QBP,CALR,YARS,LSM14A,CARS,EIF3I,EIF3J,EIF3D,EIF3F,EIF3G,EIF3H,EIF3B,SPCS3,PARS2,EIF4A3,MRPL19,TRMT6,CIRBP,MRPS33,MRPS23,RBM8A,MRPL37,FARSB,CTNNB1,EFTUD1,DDOST,DDX3X,DDX1,DAPK3,DARS,AIMP1,EFTUD2,NARS2,ITM2B,QKI,ELAVL1,EIF4B,EIF2S3,EIF4G1,EIF4G2,EIF5,EIF5B,EGFR,EIF2S1,EIF2B1,EEF2,EIF2D,EEF1G,CARS2,PUM…
GO: Biological Process	GO:0044093	positive regulation of molecular function	3.56e-23	384	1208	IQGAP1,NRP1,ACADVL,RIPK1,ACTN4,FAM162A,ACTN2,TRADD,ADCY3,ADD1,PARP1,ADRBK1,AGT,AKT1,ARHGEF7,ALDH1A1,AKT2,CDC16,BIN1,ANK2,SPAG9,ANXA3,APAF1,ANK3,ANXA2,APOA4,APOA2,APOE,APOC2,ARAF,RPS6KA4,ARRB1,ARL1,ARHGAP6,ARHGAP5,ARHGAP4,RHOG,ASPH,ARHGEF2,AIFM1,ATP6V0D1,RGN,RAB3GAP2,BAK1,BAX,BCL2,PIP5K1A,BTK,FOXL2,NSMAF,FZD1,C6,C9,C5,TBC1D10B,CALD1,CALM3,CALR,PRKRA,CUL1,PKP4,CAV1,CASP1,SPDYA,CASP7,CASP8,CAT,LAMTO…
GO: Biological Process	GO:0005975	carbohydrate metabolic process	9.97e-23	283	822	DPM1,ACADM,PARP1,MTMR2,AGL,AKT1,ALDH1B1,B3GAT3,AKT2,ALDOC,ALDOA,GDPGP1,ARSB,RGN,GALM,PGLS,BGN,SLC25A11,GNPDA2,CANX,DAK,CALM3,CALR,GLCE,RAE1,SLC25A12,CD44,MLEC,CHI3L1,CHIT1,ISYNA1,GNPTAB,STT3B,IP6K1,NUPL1,SEC24D,NUP153,CPT1A,NUP35,PARP3,PARP2,GNPDA1,SLC25A13,CTBS,NUP37,CYB5A,CS,MAPK14,CRYAB,ALG12,ALG3,VCAN,CSPG4,DCN,DDOST,DAD1,AIMP1,COLGALT1,ALG9,CYB5R3,INPP5K,MPDU1,GLB1L,H6PD,NUP155,NCOR1,ENO2,SE…
GO: Biological Process	GO:0051186	cofactor metabolic process	1.366e-21	126	278	SUCLG1,SUCLA2,ACACA,ACADSB,ACO2,ACO1,KYNU,VNN1,ALAD,AMBP,NFS1,ATIC,PGLS,PRDX5,BTD,BLVRB,BLVRA,PDXK,KMO,AASDHPPT,PPCDC,CBR1,DGAT1,MTHFD1L,ACSL5,CPOX,ABCB6,CS,DBT,DNMT1,DLD,DLST,H6PD,SLC27A3,FASN,ACSL3,ACSL1,ACSL4,FECH,FDXR,COASY,FH,FLAD1,ALDH1L1,G6PD,HIBADH,FOLH1,ACAA2,DCXR,GART,GAMT,COQ6,GPHN,GCDH,HEBP1,GPD2,GPD1,HSD17B4,GNMT,HPX,HMOX2,HMOX1,HMGCL,HMBS,MAT2B,IDH3G,IDH3B,IDH3A,IDH2,IDH1,NADKD1,IRE…
GO: Biological Process	GO:0061024	membrane organization	2.333e-21	180	460	VPS33B,ABCA1,NAPG,NAPA,SNAP23,GBF1,AP3D1,AP1M1,AP1S2,AP2B1,AP1B1,AP1G1,AKT1,AIF1,AKT2,ANK2,TIMM13,ANXA7,ANK3,MYOF,ANXA1,ANXA2,ARCN1,WASL,ARF6,ARRB1,RHOG,HGS,RABEP1,DYSF,PICALM,SUN2,SAMM50,BID,BAK1,BAX,BCL2,TECPR1,PIP5K1A,EEA1,STX7,GNPAT,CUL3,WIPI2,CAV1,TOR1AIP1,CD9,STX11,CDH1,USO1,VTA1,ELMO1,C2CD5,SEC16A,GET4,SEC24D,CNP,AP2M1,MFN2,CLTA,CLTC,PPIF,DNM1L,COPA,COPB1,FLOT1,DAB2,COPB2,DNM2,DLG1,INPP5K,…
GO: Biological Process	GO:0006457	protein folding	3.034e-21	108	224	AARS,AIP,APOA2,APCS,FKBP10,BAG1,CANX,CALR,CCT6A,CD74,MLEC,FKBP7,CLU,PIGK,PPIF,DNAJC27,DNAJB6,PDIA6,TRAP1,CRYAB,ALG12,PPIG,BAG3,BAG5,BAG2,MPDU1,TOR1A,ERP29,PDIA5,FKBP4,FKBP5,FKBP3,FKBP2,RUVBL2,CLPX,HSPH1,MAN1B1,SEC63,PPIE,HSPA14,PPIH,TUBA1B,TUBB4B,TUBB3,SH3GLB1,DNAJC25,STUB1,UBE4B,CWC27,CCT8,PTGES3,CCT4,CCT2,AHSA1,PDIA3,HSPA8,HSP90AB1,DNAJA1,HSPA5,TOR1B,TOR2A,DNAJB1,FKBP9,CHORDC1,LMAN2L,LRPAP1,DNA…
GO: Biological Process	GO:0030163	protein catabolic process	4.471e-21	205	551	FBXO4,FBXW8,FBXO6,AKT1,SQSTM1,CDC16,AMBP,APOB,APOE,USP13,ARRB1,ARRB2,BUB3,HGS,ATM,USP8,USP10,USP14,FBXO7,ARIH1,BAX,HECTD1,USP11,USP9X,CAST,CUL4B,CUL4A,CUL3,CUL2,CUL1,HERC4,GGA1,CASP8,CDC23,CDK2,CDC42,CDK1,DERL1,USP34,CDKN1B,STT3B,CUL7,RNF40,PSMD6,USP15,CLU,SUFU,TPP1,HDAC6,HUWE1,UCHL5,UBR5,PSMD14,PSME3,PCYOX1,DDB1,LRRK2,UBE2L6,HECTD3,DAB2,TRIP12,CYLD,TBL1XR1,UBE4A,LONP1,PSMF1,ENPEP,SERPINB1,EGFR,P…
GO: Biological Process	GO:0016044	cellular membrane organization	6.102e-21	177	453	VPS33B,ABCA1,NAPG,NAPA,SNAP23,GBF1,AP3D1,AP1M1,AP1S2,AP2B1,AP1B1,AP1G1,AKT1,AIF1,AKT2,ANK2,TIMM13,ANXA7,ANK3,MYOF,ANXA1,ANXA2,ARCN1,WASL,ARF6,ARRB1,RHOG,HGS,RABEP1,DYSF,PICALM,SUN2,SAMM50,BID,BAK1,BAX,BCL2,TECPR1,PIP5K1A,EEA1,STX7,GNPAT,CUL3,WIPI2,CAV1,TOR1AIP1,CD9,STX11,CDH1,USO1,VTA1,ELMO1,C2CD5,SEC16A,GET4,SEC24D,CNP,AP2M1,MFN2,CLTA,CLTC,PPIF,DNM1L,COPA,COPB1,FLOT1,DAB2,COPB2,DNM2,DLG1,INPP5K,…
GO: Biological Process	GO:0043085	positive regulation of catalytic activity	1.347e-20	323	1002	IQGAP1,ACADVL,RIPK1,FAM162A,TRADD,ADCY3,ADD1,ADRBK1,AGT,AKT1,ARHGEF7,ALDH1A1,AKT2,CDC16,BIN1,SPAG9,APAF1,APOA4,APOA2,APOE,APOC2,ARAF,ARRB1,ARL1,ARHGAP6,ARHGAP5,ARHGAP4,RHOG,AIFM1,ATP6V0D1,RGN,RAB3GAP2,BAK1,BAX,BCL2,PIP5K1A,FOXL2,NSMAF,C6,C9,C5,TBC1D10B,CALM3,CALR,PRKRA,CUL1,PKP4,CAV1,CASP1,SPDYA,CASP7,CASP8,LAMTOR3,POT1,CDC23,RIC8A,CDC42,CDK1,CD81,CD74,CHI3L1,DOCK4,PTPLAD1,CDKN1B,CUL7,CCR1,PSMD6,…
GO: Biological Process	GO:0034622	cellular macromolecular complex assembly	2.849e-20	215	595	NAPA,ADD1,MBD2,PRPF31,AP2B1,AP1B1,AIF1,APCS,LIMD1,WASL,ARF6,ARHGAP6,AIFM1,SART1,PICALM,BCS1L,COG4,NCK2,C1QBP,CAPG,CAPZA1,CAPZA2,CALR,PIAS1,LSM14A,SMARCA5,CAV1,CAPZB,EIF3D,AHCTF1,SRSF9,RUVBL1,GEMIN5,EVL,CDKN1B,CIRBP,HDAC6,ARPC2,ACTR3,ARPC3,ARPC1B,ARPC4,PQBP1,DNM1L,CRNKL1,CRYAB,WDR77,CSNK2B,H2AFV,SNX9,EFTUD1,DDX6,DDX3X,DDX1,DAB2,DYNC1H1,LONP1,DIAPH1,DIAPH2,DLG1,CENPV,GEMIN6,TUBAL3,RSF1,H2AFY,CLINT1…
GO: Biological Process	GO:0051345	positive regulation of hydrolase activity	3.923e-20	183	481	IQGAP1,ACADVL,RIPK1,FAM162A,TRADD,ADCY3,ADD1,ADRBK1,AGT,ARHGEF7,ALDH1A1,AKT2,BIN1,APAF1,APOA4,APOC2,ARRB1,ARL1,ARHGAP6,ARHGAP5,ARHGAP4,RHOG,AIFM1,ATP6V0D1,RGN,RAB3GAP2,BAK1,BAX,PIP5K1A,FOXL2,C6,C9,TBC1D10B,CALM3,CALR,PKP4,CAV1,CASP1,CASP7,CASP8,POT1,RIC8A,DOCK4,PTPLAD1,CDKN1B,CUL7,TPP1,PDCD6,DNAJB6,PDIA6,CTSH,PSMD14,PSME3,SNX9,VAPB,DCTN1,LRRK2,DDX3X,ARHGEF6,GOSR2,DOCK1,PPM1F,EGFR,EIF2S1,FBLN1,PTK…
GO: Biological Process	GO:0006508	proteolysis	5.928e-20	317	987	FBXO4,SERPINA3,FBXW8,FBXO6,ADAM10,SENP3,AEBP1,AGT,AKT1,SQSTM1,CDC16,PROZ,ANPEP,UBA3,APOE,APEH,USP13,ARRB1,ARRB2,BUB3,SERPINC1,USP8,USP10,USP14,FBXO7,ARIH1,BAX,HECTD1,USP11,USP9X,BLMH,C1R,C2,SERPING1,CAPN5,CAPN1,CAPN2,CAPNS1,SERPINA6,CUL4B,CUL4A,CUL3,CUL2,CUL1,SERPINH1,CASP1,HERC4,CASP7,CASP8,EIF3F,SPCS3,CDC23,CDK2,CDK1,DERL1,USP34,STT3B,SCRN1,CUL7,CTSC,RNF40,BRCC3,PSMD6,USP15,CLU,SUFU,TPP1,CPN1,C…
GO: Biological Process	GO:0046395	carboxylic acid catabolic process	7.394e-20	101	210	HIBCH,ACAA1,ACADM,ACADS,ACADL,ACAT1,ACADSB,ACADVL,ACOX1,KYNU,AKT1,ABCD1,AKT2,GGACT,ASL,ALDH7A1,ACOX3,BCAT2,BCKDHB,KMO,CCBL1,ALDH4A1,ACSL5,CPT1A,CRAT,CPT2,CSAD,PCYOX1L,PCYOX1,ECI1,DBT,DBI,DLD,DLST,SARDH,DECR1,ECH1,SLC27A4,FAH,ALDH1L1,ETFDH,FAAH,ASRGL1,MTOR,HIBADH,GLS,ECI2,ACAA2,GOT2,GOT1,GLUL,AKR1A1,BCKDK,GCDH,GSTZ1,HADHB,HADH,HADHA,HSD17B10,HSD17B4,HMGCL,NPL,IVD,ACOT7,DTD2,ACAD8,MUT,ALDH6A1,MCCC1…
GO: Biological Process	GO:0016054	organic acid catabolic process	7.394e-20	101	210	HIBCH,ACAA1,ACADM,ACADS,ACADL,ACAT1,ACADSB,ACADVL,ACOX1,KYNU,AKT1,ABCD1,AKT2,GGACT,ASL,ALDH7A1,ACOX3,BCAT2,BCKDHB,KMO,CCBL1,ALDH4A1,ACSL5,CPT1A,CRAT,CPT2,CSAD,PCYOX1L,PCYOX1,ECI1,DBT,DBI,DLD,DLST,SARDH,DECR1,ECH1,SLC27A4,FAH,ALDH1L1,ETFDH,FAAH,ASRGL1,MTOR,HIBADH,GLS,ECI2,ACAA2,GOT2,GOT1,GLUL,AKR1A1,BCKDK,GCDH,GSTZ1,HADHB,HADH,HADHA,HSD17B10,HSD17B4,HMGCL,NPL,IVD,ACOT7,DTD2,ACAD8,MUT,ALDH6A1,MCCC1…
GO: Biological Process	GO:0006418	tRNA aminoacylation for protein translation	1.526e-19	39	48	AARS,YARS,CARS,PARS2,FARSB,DARS,AIMP1,NARS2,CARS2,FARSA,EPRS,TARS2,POLG2,GARS,YARS2,WARS2,FARS2,HARS,IARS,KARS,AARS2,PPA2,MARS,RARS2,NARS,PPA1,IARS2,RARS,QARS,SARS,TARS,EARS2,DARS2,TARSL2,WARS,VARS,LARS2,HARS2,AIMP2
GO: Biological Process	GO:0006629	lipid metabolic process	1.933e-19	378	1238	SERPINA3,DPM1,ABCA1,ACACA,ACAA1,ACADM,ACADS,ACADL,ACAT1,ACADSB,ACADVL,MTMR1,ACOX1,ABCC3,ADH7,CPNE1,MTMR2,AGT,AKT1,SGPL1,EIF2B2,CPNE3,ALDH1A1,EIF2B4,ALB,ABCD1,AKT2,PHGDH,ALDH3A2,ALDH1A2,ALOX15,ALOX5,ANXA1,APOB,APOA4,APOA2,APOE,APOC3,APOC2,PLCD3,ARSA,ARSB,ARSD,ASAH1,ATP1A1,ATM,ATP5A1,MTMR6,AZGP1,ACOX3,BDH1,BHMT,BAX,PIP5K1A,GNPAT,NSMAF,AGPS,SLC25A20,DEGS1,SERPINA6,CAV1,CAT,AKR1C3,DGAT1,PLA2G4C,SIN3A…
GO: Biological Process	GO:0007015	actin filament organization	2.641e-19	110	241	ACTC1,ACTN1,ACTN4,ACTN2,ADD1,AIF1,ALDOA,WASL,ARF6,ARRB1,ARHGAP6,ARHGEF2,BCL2,NCK2,CAPG,CAPZA1,CAPZA2,CALD1,CUL3,CAPZB,CDC42,KANK2,EVL,LIMA1,CFL2,ABI1,ARPC2,ACTR3,ARPC3,ARPC1B,ARPC4,SORBS3,ABI2,DBN1,DIAPH1,DIAPH2,DLG1,INPP5K,ROCK2,DPYSL3,ARHGEF10,PPM1F,PTK2B,FER,TRPV4,EPS8,MTOR,CORO1A,FLNA,KPTN,TRIOBP,BAIAP2,CDC42EP2,HCK,NCKAP1L,HCLS1,ARFGEF1,SORBS1,GSN,GRB2,ARPC1A,PDLIM3,ARPC5L,SPTBN4,JAK2,INPPL1…
GO: Biological Process	GO:0044255	cellular lipid metabolic process	3.987e-19	292	900	DPM1,ABCA1,ACACA,ACAA1,ACADM,ACADS,ACADL,ACAT1,ACADSB,ACADVL,MTMR1,ACOX1,ADH7,MTMR2,AGT,AKT1,SGPL1,EIF2B2,ALDH1A1,EIF2B4,ABCD1,AKT2,PHGDH,ALDH3A2,ALDH1A2,ALOX15,ALOX5,ANXA1,APOB,APOA4,APOA2,APOE,APOC3,APOC2,ARSA,ARSB,ARSD,ASAH1,ATM,MTMR6,ACOX3,BDH1,BHMT,BAX,PIP5K1A,GNPAT,NSMAF,AGPS,SLC25A20,DEGS1,CAV1,CAT,AKR1C3,DGAT1,PLA2G4C,SIN3A,CD81,CD74,ISYNA1,PTPLAD1,IP6K1,CETP,FIG4,PIGT,LPGAT1,ACSL5,CPT1A,…
GO: Biological Process	GO:0006403	RNA localization	4.12e-19	77	143	THOC5,KHSRP,UPF2,RAE1,PNPT1,AHCTF1,SRSF9,EIF4A3,DHX38,THOC6,CKAP5,NUPL1,G3BP2,MVP,NUP153,RBM8A,NUP35,THOC1,NUP37,LRPPRC,CDC40,DDX39A,ALYREF,SRSF11,QKI,NUP155,NUP93,RNPS1,NUP50,XPOT,FMR1,NUPL2,NUP85,GLE1,NXF1,SRRM1,HTT,KHDRBS1,AGFG1,HNRNPA2B1,DDX19B,U2AF2,UPF3B,MAGOH,HNRNPA1L2,NUP88,MYO1C,THOC2,NCBP1,NUP107,CPSF1,EXOSC10,NUP133,UPF1,RAN,SEH1L,SRSF7,SRSF1,SRSF2,SRSF5,SRSF3,SRSF4,SEC13,PRPF6,STAU1,C…
GO: Biological Process	GO:0050657	nucleic acid transport	5.155e-19	74	135	THOC5,KHSRP,UPF2,RAE1,PNPT1,AHCTF1,SRSF9,EIF4A3,DHX38,THOC6,CKAP5,NUPL1,G3BP2,MVP,NUP153,RBM8A,NUP35,THOC1,NUP37,LRPPRC,CDC40,DDX39A,ALYREF,SRSF11,QKI,NUP155,NUP93,RNPS1,NUP50,XPOT,FMR1,NUPL2,NUP85,GLE1,NXF1,SRRM1,HTT,KHDRBS1,AGFG1,HNRNPA2B1,DDX19B,U2AF2,UPF3B,MAGOH,HNRNPA1L2,NUP88,MYO1C,THOC2,NCBP1,NUP107,CPSF1,NUP133,UPF1,RAN,SEH1L,SRSF7,SRSF1,SRSF2,SRSF5,SRSF3,SRSF4,SEC13,CASC3,XPO1,NUP54,XPO7…
GO: Biological Process	GO:0051236	establishment of RNA localization	5.155e-19	74	135	THOC5,KHSRP,UPF2,RAE1,PNPT1,AHCTF1,SRSF9,EIF4A3,DHX38,THOC6,CKAP5,NUPL1,G3BP2,MVP,NUP153,RBM8A,NUP35,THOC1,NUP37,LRPPRC,CDC40,DDX39A,ALYREF,SRSF11,QKI,NUP155,NUP93,RNPS1,NUP50,XPOT,FMR1,NUPL2,NUP85,GLE1,NXF1,SRRM1,HTT,KHDRBS1,AGFG1,HNRNPA2B1,DDX19B,U2AF2,UPF3B,MAGOH,HNRNPA1L2,NUP88,MYO1C,THOC2,NCBP1,NUP107,CPSF1,NUP133,UPF1,RAN,SEH1L,SRSF7,SRSF1,SRSF2,SRSF5,SRSF3,SRSF4,SEC13,CASC3,XPO1,NUP54,XPO7…
GO: Biological Process	GO:0050658	RNA transport	5.155e-19	74	135	THOC5,KHSRP,UPF2,RAE1,PNPT1,AHCTF1,SRSF9,EIF4A3,DHX38,THOC6,CKAP5,NUPL1,G3BP2,MVP,NUP153,RBM8A,NUP35,THOC1,NUP37,LRPPRC,CDC40,DDX39A,ALYREF,SRSF11,QKI,NUP155,NUP93,RNPS1,NUP50,XPOT,FMR1,NUPL2,NUP85,GLE1,NXF1,SRRM1,HTT,KHDRBS1,AGFG1,HNRNPA2B1,DDX19B,U2AF2,UPF3B,MAGOH,HNRNPA1L2,NUP88,MYO1C,THOC2,NCBP1,NUP107,CPSF1,NUP133,UPF1,RAN,SEH1L,SRSF7,SRSF1,SRSF2,SRSF5,SRSF3,SRSF4,SEC13,CASC3,XPO1,NUP54,XPO7…
GO: Biological Process	GO:0051028	mRNA transport	5.529e-19	67	116	THOC5,KHSRP,UPF2,RAE1,AHCTF1,SRSF9,EIF4A3,DHX38,THOC6,NUPL1,G3BP2,MVP,NUP153,RBM8A,NUP35,THOC1,NUP37,LRPPRC,CDC40,DDX39A,ALYREF,SRSF11,QKI,NUP155,NUP93,RNPS1,NUP50,FMR1,NUPL2,NUP85,GLE1,NXF1,SRRM1,HTT,AGFG1,DDX19B,U2AF2,UPF3B,MAGOH,HNRNPA1L2,NUP88,MYO1C,THOC2,NCBP1,NUP107,CPSF1,NUP133,UPF1,SEH1L,SRSF7,SRSF1,SRSF2,SRSF5,SRSF3,SRSF4,SEC13,CASC3,XPO1,NUP54,XPO7,U2AF1,CPSF2,NUP214,DDX39B,NUP205,NUP21…
GO: Biological Process	GO:0051603	proteolysis involved in cellular protein catabolic process	5.567e-19	164	424	FBXO4,FBXW8,FBXO6,AKT1,SQSTM1,CDC16,USP13,ARRB1,ARRB2,BUB3,USP8,USP10,USP14,FBXO7,ARIH1,BAX,HECTD1,USP11,USP9X,CUL4B,CUL4A,CUL3,CUL2,CUL1,HERC4,CASP8,CDC23,CDK2,CDK1,DERL1,USP34,STT3B,CUL7,RNF40,PSMD6,USP15,CLU,SUFU,HDAC6,HUWE1,UCHL5,UBR5,PSMD14,PSME3,PCYOX1,DDB1,LRRK2,UBE2L6,HECTD3,DAB2,TRIP12,CYLD,TBL1XR1,UBE4A,LONP1,PSMF1,PTK2B,OS9,CLPX,MAN1B1,ERLIN2,FAF1,ATE1,CRBN,GCLC,GNB2L1,DERL2,ZMPSTE24,S…
GO: Biological Process	GO:0043039	tRNA aminoacylation	5.611e-19	40	51	AARS,YARS,CARS,PARS2,FARSB,DARS,AIMP1,NARS2,CARS2,FARSA,EPRS,TARS2,POLG2,GARS,YARS2,WARS2,FARS2,HARS,IARS,KARS,AARS2,PPA2,MARS,RARS2,NARS,PPA1,IARS2,RARS,QARS,SARS,QRSL1,TARS,EARS2,DARS2,TARSL2,WARS,VARS,LARS2,HARS2,AIMP2
GO: Biological Process	GO:0043038	amino acid activation	5.611e-19	40	51	AARS,YARS,CARS,PARS2,FARSB,DARS,AIMP1,NARS2,CARS2,FARSA,EPRS,TARS2,POLG2,GARS,YARS2,WARS2,FARS2,HARS,IARS,KARS,AARS2,PPA2,MARS,RARS2,NARS,PPA1,IARS2,RARS,QARS,SARS,QRSL1,TARS,EARS2,DARS2,TARSL2,WARS,VARS,LARS2,HARS2,AIMP2
GO: Biological Process	GO:0007599	hemostasis	7.046e-19	189	514	A2M,ACTG1,ACTN1,ACTN4,PABPC4,ACTN2,AKT1,ALB,ALDOA,PROZ,PAPSS2,ANXA5,ANXA7,DOK2,ANXA2,APOB,APOE,ARRB1,ARRB2,RHOG,RHOB,SERPINC1,SLC16A3,ATP2B4,ATP2A3,ATP2A2,ATP2B1,ATP1B1,C1QBP,SERPING1,C9,CAPZA1,CAPZA2,CALU,CALM3,AP3B1,CAV1,CAPZB,ENTPD1,ENTPD2,CD9,CDK2,SIN3A,CDC42,SH2B1,CD59,EVL,DOCK11,COL1A1,CLU,MFN2,WDR1,CPB2,CRK,COL3A1,MAPK14,CSK,KIF3B,CFD,DOCK1,FGR,EHD1,FGG,FGB,FGA,SCUBE1,F13A1,F12,F2,F9,FLNA,…
GO: Biological Process	GO:0033554	cellular response to stress	8.138e-19	382	1264	AARS,ACADVL,FBXO6,RIPK1,CRADD,ACTL6A,FAM162A,ADD1,PARP1,MBD4,AGT,AKT1,SQSTM1,EIF2B5,EIF2B4,EIF2B3,ALB,AKT2,AMBP,ASH2L,SPAG9,BAZ1B,MYOF,ANXA1,APOA4,APOE,APEX1,AATF,RHOB,ATM,AIFM1,SMC3,ATP6V0D1,USP10,ATRX,PRDX5,BAK1,BAX,NIPBL,SMC1A,BCL2,TECPR1,STK24,CALR,SMARCA5,CUL4B,CUL4A,CUL2,MRPS35,WIPI2,CAV1,SPDYA,CAT,PNPT1,AKR1C3,INTS7,CDK2,CDK6,RUVBL1,SIN3A,CDC42,CDK1,CD74,CD44,BCLAF1,DERL1,PTPLAD1,CDK9,CDKN…
GO: Biological Process	GO:0007596	blood coagulation	1.206e-18	187	509	A2M,ACTG1,ACTN1,ACTN4,PABPC4,ACTN2,AKT1,ALB,ALDOA,PROZ,PAPSS2,ANXA5,DOK2,ANXA2,APOB,APOE,ARRB1,ARRB2,RHOG,RHOB,SERPINC1,SLC16A3,ATP2B4,ATP2A3,ATP2A2,ATP2B1,ATP1B1,C1QBP,SERPING1,C9,CAPZA1,CAPZA2,CALU,CALM3,AP3B1,CAV1,CAPZB,ENTPD1,ENTPD2,CD9,CDK2,SIN3A,CDC42,SH2B1,CD59,EVL,DOCK11,COL1A1,CLU,MFN2,WDR1,CPB2,CRK,COL3A1,MAPK14,CSK,KIF3B,CFD,DOCK1,FGR,EHD1,FGG,FGB,FGA,SCUBE1,F13A1,F12,F2,F9,FLNA,KIF3A,…
GO: Biological Process	GO:0044257	cellular protein catabolic process	1.807e-18	167	439	FBXO4,FBXW8,FBXO6,AKT1,SQSTM1,CDC16,APOE,USP13,ARRB1,ARRB2,BUB3,USP8,USP10,USP14,FBXO7,ARIH1,BAX,HECTD1,USP11,USP9X,CUL4B,CUL4A,CUL3,CUL2,CUL1,HERC4,CASP8,CDC23,CDK2,CDK1,DERL1,USP34,STT3B,CUL7,RNF40,PSMD6,USP15,CLU,SUFU,HDAC6,HUWE1,UCHL5,UBR5,PSMD14,PSME3,PCYOX1,DDB1,LRRK2,UBE2L6,HECTD3,DAB2,TRIP12,CYLD,TBL1XR1,UBE4A,LONP1,PSMF1,PTK2B,OS9,CLN8,CLPX,MAN1B1,ERLIN2,FAF1,ATE1,CRBN,GCLC,GNB2L1,DERL2,…
GO: Biological Process	GO:0044282	small molecule catabolic process	2.447e-18	119	276	HIBCH,ACAA1,ACADM,ACADS,ACADL,ACAT1,ACADSB,ACADVL,ACOX1,KYNU,ADH7,MTMR2,AKT1,ALDH1B1,ABCD1,AKT2,GGACT,APOE,ASL,ALDH7A1,ACOX3,BDH1,BCAT2,BCKDHB,KMO,CCBL1,CBR1,ALDH4A1,AKR1C3,SNX17,ACSL5,CPT1A,CRAT,CPT2,COMT,CSAD,PCYOX1L,PCYOX1,ECI1,DBT,DBI,DLD,DLST,SARDH,DECR1,INPP5K,ECH1,SLC27A4,FAH,ESD,ALDH1L1,ETFDH,FAAH,ASRGL1,MTOR,HIBADH,GLS,ECI2,ACAA2,GOT2,GOT1,GLUL,AKR1A1,BCKDK,GCDH,GSTZ1,HADHB,HADH,HADHA,HS…
GO: Biological Process	GO:0044712	single-organism catabolic process	2.447e-18	119	276	HIBCH,ACAA1,ACADM,ACADS,ACADL,ACAT1,ACADSB,ACADVL,ACOX1,KYNU,ADH7,MTMR2,AKT1,ALDH1B1,ABCD1,AKT2,GGACT,APOE,ASL,ALDH7A1,ACOX3,BDH1,BCAT2,BCKDHB,KMO,CCBL1,CBR1,ALDH4A1,AKR1C3,SNX17,ACSL5,CPT1A,CRAT,CPT2,COMT,CSAD,PCYOX1L,PCYOX1,ECI1,DBT,DBI,DLD,DLST,SARDH,DECR1,INPP5K,ECH1,SLC27A4,FAH,ESD,ALDH1L1,ETFDH,FAAH,ASRGL1,MTOR,HIBADH,GLS,ECI2,ACAA2,GOT2,GOT1,GLUL,AKR1A1,BCKDK,GCDH,GSTZ1,HADHB,HADH,HADHA,HS…
GO: Biological Process	GO:0050817	coagulation	2.468e-18	187	512	A2M,ACTG1,ACTN1,ACTN4,PABPC4,ACTN2,AKT1,ALB,ALDOA,PROZ,PAPSS2,ANXA5,DOK2,ANXA2,APOB,APOE,ARRB1,ARRB2,RHOG,RHOB,SERPINC1,SLC16A3,ATP2B4,ATP2A3,ATP2A2,ATP2B1,ATP1B1,C1QBP,SERPING1,C9,CAPZA1,CAPZA2,CALU,CALM3,AP3B1,CAV1,CAPZB,ENTPD1,ENTPD2,CD9,CDK2,SIN3A,CDC42,SH2B1,CD59,EVL,DOCK11,COL1A1,CLU,MFN2,WDR1,CPB2,CRK,COL3A1,MAPK14,CSK,KIF3B,CFD,DOCK1,FGR,EHD1,FGG,FGB,FGA,SCUBE1,F13A1,F12,F2,F9,FLNA,KIF3A,…
GO: Biological Process	GO:0019884	antigen processing and presentation of exogenous antigen	4.722e-18	86	174	AP3D1,AP1M1,AP1S2,AP2B1,AP1B1,AP2A2,AP2A1,AP1G1,CANX,CALR,AP3B1,CD74,PSMD6,SEC24D,AP2M1,CLTA,CLTC,CTSS,CTSD,ACTR1A,ACTR1B,CTSL1,PSMD14,PSME3,DCTN1,CYBB,DYNC1H1,DYNC1LI2,DYNC1I2,KIF3B,DNM2,PSMF1,SEC24C,SEC24A,KIF3A,DCTN4,SEC23A,SAR1B,SEC24B,PDIA3,DCTN2,HLA-DRA,HLA-DPA1,KLC1,KIF2A,KIF5A,ITGB5,ITGAV,LNPEP,SEC61A1,NCF2,PSMC5,PSMC4,PSMD1,PSMC6,PSMD3,PSMD2,PSMB8,PSMB9,PSMC2,PSMC1,PSME1,PSME2,PSMD7,PSMD…
GO: Biological Process	GO:0043632	modification-dependent macromolecule catabolic process	6.429e-18	156	405	FBXO4,FBXW8,FBXO6,AKT1,SQSTM1,CDC16,USP13,ARRB1,ARRB2,BUB3,USP8,USP10,USP14,FBXO7,ARIH1,HECTD1,USP11,USP9X,CUL4B,CUL4A,CUL3,CUL2,CUL1,HERC4,PNPT1,CDC23,CDK2,CDK1,DERL1,USP34,STT3B,CUL7,RNF40,PSMD6,USP15,CLU,SUFU,HDAC6,HUWE1,UCHL5,UBR5,PSMD14,PSME3,PCYOX1,DDB1,LRRK2,UBE2L6,HECTD3,DAB2,TRIP12,CYLD,TBL1XR1,UBE4A,LONP1,PSMF1,PTK2B,OS9,MAN1B1,ERLIN2,FAF1,ATE1,CRBN,GCLC,GNB2L1,DERL2,ZMPSTE24,STUB1,UBE4…
GO: Biological Process	GO:0048002	antigen processing and presentation of peptide antigen	7.019e-18	91	190	AP1M1,AP1S2,AP2B1,AP1B1,AP2A2,AP2A1,AP1G1,BLMH,CANX,CALR,CD74,PSMD6,SEC24D,AP2M1,CLTA,CLTC,CTSS,CTSD,ACTR1A,ACTR1B,CTSL1,PSMD14,PSME3,DCTN1,CYBB,DYNC1H1,DYNC1LI2,DYNC1I2,KIF3B,DNM2,PSMF1,ERAP1,NPEPPS,SEC24C,SEC24A,KIF3A,DCTN4,SEC23A,SAR1B,SEC24B,PDIA3,DCTN2,HLA-DRA,HLA-DPA1,KLC1,KIF2A,KIF5A,ITGB5,ITGAV,LNPEP,SEC61A1,NCF2,ERAP2,PYCARD,PSMC5,PSMC4,PSMD1,PSMC6,PSMD3,PSMD2,PSMB8,PSMB9,PSMC2,PSMC1,PSM…
GO: Biological Process	GO:0006732	coenzyme metabolic process	7.841e-18	105	234	SUCLG1,SUCLA2,ACACA,ACADSB,ACO2,ACO1,KYNU,VNN1,NFS1,ATIC,PGLS,PRDX5,PDXK,KMO,AASDHPPT,PPCDC,CBR1,DGAT1,MTHFD1L,ACSL5,CS,DBT,DNMT1,DLD,DLST,H6PD,SLC27A3,FASN,ACSL3,ACSL1,ACSL4,FDXR,COASY,FH,FLAD1,ALDH1L1,G6PD,HIBADH,FOLH1,ACAA2,DCXR,GART,GAMT,COQ6,GPHN,GCDH,GPD2,GPD1,HSD17B4,GNMT,HMGCL,MAT2B,IDH3G,IDH3B,IDH3A,IDH2,IDH1,NADKD1,LDHA,TPK1,NUDT12,MTHFD1,MTHFR,MTR,MAT2A,MDH1,MDH2,OGDH,COQ9,PCBD1,NCF2,M…
GO: Biological Process	GO:0051128	regulation of cellular component organization	1.382e-17	406	1383	ABR,NRP1,NAPA,ACTN4,FAM162A,ADAM10,ADD1,NOC2L,MTMR2,AGT,AKT1,AHSG,CDC16,ALDOA,BIN1,ANXA7,ANXA1,ANXA2,APOA2,APOE,APOC3,APOC2,LIMD1,WASL,ARF6,RPS6KA4,ARRB1,ARRB2,ZMYM3,ARHGAP6,ARHGAP4,ARHGDIA,BUB3,RHOG,ARHGEF2,ATM,ARHGEF1,PICALM,BID,BAK1,BAX,NIPBL,BCL2,STK24,NCK2,DST,C21orf2,FMNL1,C1QBP,CAPG,CAMK2D,CAPZA1,CAPZA2,CALR,CBL,CAV1,CAPZB,NUMB,CD14,POT1,CDC23,SIN3A,CLIC4,CDC42,CDK11B,SEPT7,CDA,SH2B1,CD81,…
GO: Biological Process	GO:0002478	antigen processing and presentation of exogenous peptide antigen	1.859e-17	84	171	AP1M1,AP1S2,AP2B1,AP1B1,AP2A2,AP2A1,AP1G1,CANX,CALR,CD74,PSMD6,SEC24D,AP2M1,CLTA,CLTC,CTSS,CTSD,ACTR1A,ACTR1B,CTSL1,PSMD14,PSME3,DCTN1,CYBB,DYNC1H1,DYNC1LI2,DYNC1I2,KIF3B,DNM2,PSMF1,SEC24C,SEC24A,KIF3A,DCTN4,SEC23A,SAR1B,SEC24B,PDIA3,DCTN2,HLA-DRA,HLA-DPA1,KLC1,KIF2A,KIF5A,ITGB5,ITGAV,LNPEP,SEC61A1,NCF2,PSMC5,PSMC4,PSMD1,PSMC6,PSMD3,PSMD2,PSMB8,PSMB9,PSMC2,PSMC1,PSME1,PSME2,PSMD7,PSMD11,PSMD12,LG…
GO: Biological Process	GO:0019941	modification-dependent protein catabolic process	1.885e-17	154	402	FBXO4,FBXW8,FBXO6,AKT1,SQSTM1,CDC16,USP13,ARRB1,ARRB2,BUB3,USP8,USP10,USP14,FBXO7,ARIH1,HECTD1,USP11,USP9X,CUL4B,CUL4A,CUL3,CUL2,CUL1,HERC4,CDC23,CDK2,CDK1,DERL1,USP34,STT3B,CUL7,RNF40,PSMD6,USP15,CLU,SUFU,HDAC6,HUWE1,UCHL5,UBR5,PSMD14,PSME3,PCYOX1,DDB1,LRRK2,UBE2L6,HECTD3,DAB2,TRIP12,CYLD,TBL1XR1,UBE4A,LONP1,PSMF1,PTK2B,OS9,MAN1B1,ERLIN2,FAF1,ATE1,CRBN,GCLC,GNB2L1,DERL2,ZMPSTE24,STUB1,UBE4B,USP3…
GO: Biological Process	GO:0006913	nucleocytoplasmic transport	2.173e-17	145	371	ADAM10,ADAR,PARP1,AGT,AKT1,MCM3AP,FZD1,CALR,THOC5,UPF2,RAE1,AKR1C3,SRSF9,CDH1,CDK1,DHX38,NCKIPSD,THOC6,NUPL1,G3BP2,NOP58,SUFU,RBM8A,THOC1,UBR5,CDC40,MAPK14,DDX39A,NUTF2,ALYREF,NOLC1,DAB2,DAG1,SRSF11,IPO4,CYLD,NUP155,EMD,EGFR,RNPS1,MALT1,AHCYL1,NUP50,XPOT,CHP1,MTOR,AKAP13,TMEM173,FLNA,FAF1,NUPL2,RBPMS,TACC3,IPO11,GLE1,NXF1,GNAQ,NDUFA13,SRRM1,TXNIP,HTT,HCLS1,KHDRBS1,PDIA3,MYBBP1A,CHERP,IPO7,HTATIP2…
GO: Biological Process	GO:0032269	negative regulation of cellular protein metabolic process	2.186e-17	169	456	ADAR,NOC2L,AKT1,EIF2B5,EIF2B4,EIF2B3,CDC16,APOA4,APOE,AATF,ARRB1,ARRB2,BUB3,BAK1,BAX,CALR,CAV1,CDC23,SIN3A,EIF4A3,CDKN1B,PSMD6,CIRBP,SUFU,HDAC6,TAOK3,CTBP1,UBR5,PSMD14,PSME3,DDX3X,DAPK3,TRIP12,DNMT1,ITM2B,INPP5K,PSMF1,ATG5,BAG5,RAB23,DUSP9,DUSP3,PPM1F,EIF2B1,CLN8,EPRS,F2,CHP1,G6PD,FMR1,GCLC,SYNCRIP,VPS28,GNB2L1,GNAQ,GMFB,NDUFA13,SNX6,GSTP1,MGEA5,IGF2BP3,IGF2BP2,GPS1,PDCD4,HSP90AB1,HSPA4,IGBP1,IDE…
GO: Biological Process	GO:0051169	nuclear transport	2.505e-17	146	375	ADAM10,ADAR,NOC2L,PARP1,AGT,AKT1,MCM3AP,FZD1,CALR,THOC5,UPF2,RAE1,AKR1C3,SRSF9,CDH1,CDK1,DHX38,NCKIPSD,THOC6,NUPL1,G3BP2,NOP58,SUFU,RBM8A,THOC1,UBR5,CDC40,MAPK14,DDX39A,NUTF2,ALYREF,NOLC1,DAB2,DAG1,SRSF11,IPO4,CYLD,NUP155,EMD,EGFR,RNPS1,MALT1,AHCYL1,NUP50,XPOT,CHP1,MTOR,AKAP13,TMEM173,FLNA,FAF1,NUPL2,RBPMS,TACC3,IPO11,GLE1,NXF1,GNAQ,NDUFA13,SRRM1,TXNIP,HTT,HCLS1,KHDRBS1,PDIA3,MYBBP1A,CHERP,IPO7,H…
GO: Biological Process	GO:0032787	monocarboxylic acid metabolic process	3.28e-17	176	483	ACACA,ACAA1,ACADM,ACADS,ACADL,ACADSB,ACADVL,ACOX1,ABCC3,KYNU,ADH7,AGT,AKT1,EIF2B2,ALDH9A1,ALDH1A1,EIF2B4,ALB,ABCD1,AKT2,PHGDH,ALDH1A2,ALOX15,ALOX5,ANXA1,APOA4,APOA2,APOC3,APOC2,P4HA2,SLC16A3,ACOX3,BHMT,BGN,BTD,SLC25A20,DEGS1,CAV1,ALDH4A1,AKR1C3,MTHFD1L,PLA2G4C,CD74,PTPLAD1,ACSL5,CPT1A,CRAT,CRABP2,CPT2,CYB5A,MAPK14,RDH10,VCAN,CSPG4,DCN,ECI1,DBI,CYP27A1,DLD,CYP7B1,QKI,DECR1,ECH1,CAB39,EIF2B1,SLC27A…
GO: Biological Process	GO:0043623	cellular protein complex assembly	3.519e-17	137	345	NAPA,ADD1,MBD2,AP2B1,AP1B1,AIF1,APCS,WASL,ARF6,ARHGAP6,AIFM1,PICALM,BCS1L,COG4,NCK2,CAPG,CAPZA1,CAPZA2,CALR,CAV1,CAPZB,AHCTF1,EVL,CDKN1B,HDAC6,ARPC2,ACTR3,ARPC3,ARPC1B,ARPC4,DNM1L,CRYAB,CSNK2B,DAB2,LONP1,DIAPH1,DIAPH2,DLG1,TUBAL3,CLINT1,PTK2B,TMED10,TMED2,FGG,FGB,FER,FGA,FES,FKBP4,TRPV4,EPS15,MTOR,CORO1A,FMOD,TRIOBP,ADRM1,CDC42EP2,TUBA1B,TUBB4B,TUBB3,STUB1,HCK,NCKAP1L,HCLS1,ARFGEF1,CCT2,GSN,GRB2,…
GO: Biological Process	GO:0044703	multi-organism reproductive process	3.999e-17	246	747	A2M,BANF1,RIPK1,ADAR,ADA,RNGTT,AP1M1,AP1G2,BIN1,AMBP,ANPEP,SLC25A4,SLC25A5,SLC25A6,APOA2,ATP6V0C,BAX,BCL2,RECK,C1QBP,THOC5,CUL4A,CUL2,CUL1,CAV1,CASP8,AKR1C3,PLA2G4C,NELFB,CD81,CDK13,DERL1,NELFCD,CDK9,THOC6,CUL7,ATP6V1H,C14orf166,NUP153,PDCD6IP,CREBBP,THOC1,COMT,COPB1,CTBP2,CTBP1,ALYREF,DDB1,VAPB,DDX5,DDX3X,DAG1,NLRX1,CYP11A1,DYNC1I2,DLG1,NMT2,ABCG2,RSF1,INPP5K,EIF4G1,FBLN1,SF3B2,COPS6,ACSL4,FDPS,…
GO: Biological Process	GO:0051704	multi-organism process	7.048e-17	421	1458	A2M,BANF1,ABCA1,ABR,ACP5,ACTA2,RIPK1,ADAR,ADA,RNGTT,RNMT,ADH7,MBD2,AP1M1,AP1G2,AP1S2,AP2B1,AP1B1,AP2A2,AP2A1,AP1G1,ALB,ALPL,BIN1,AMBP,ANXA3,ANXA7,ANPEP,SLC25A4,SLC25A5,SLC25A6,APOB,APOA2,WASL,DCLK1,SMC3,ATP6V0D1,ATP6V1B1,ATP6V1B2,ATP6V0C,ATP6V0A1,ATP6V1E1,ATP6V1C1,BAK1,BAX,BCL2,RECK,C1QBP,C9,THOC5,PRKRA,LSM14A,CUL4A,CUL2,CUL1,CAV1,CASP1,RAE1,CASP8,AKR1C3,CD14,CDK6,PLA2G4C,SAMHD1,SIN3A,NELFB,CD81,…
GO: Biological Process	GO:0019882	antigen processing and presentation	7.841e-17	99	221	AP3D1,AP1M1,AP1S2,AP2B1,AP1B1,AP2A2,AP2A1,AP1G1,AZGP1,BLMH,CANX,CALR,AP3B1,CD74,PSMD6,SEC24D,AP2M1,CLTA,CLTC,CTSS,CTSD,ACTR1A,ACTR1B,CTSH,CTSL1,PSMD14,PSME3,DCTN1,CYBB,DYNC1H1,DYNC1LI2,DYNC1I2,KIF3B,DNM2,PSMF1,ERAP1,NPEPPS,SEC24C,FCGRT,SEC24A,KIF3A,DCTN4,SEC23A,SAR1B,SEC24B,PDIA3,DCTN2,HLA-DRA,HLA-DPA1,IGHM,ICAM1,KLC1,KIF2A,KIF5A,ITGB5,ITGAV,LNPEP,SEC61A1,NCF2,ERAP2,PYCARD,PSMC5,PSMC4,PSMD1,PSMC6…
GO: Biological Process	GO:0006631	fatty acid metabolic process	9.591e-17	138	352	ACACA,ACAA1,ACADM,ACADS,ACADL,ACADSB,ACADVL,ACOX1,ADH7,AGT,AKT1,EIF2B2,EIF2B4,ABCD1,AKT2,PHGDH,ALOX15,ALOX5,ANXA1,APOA4,APOA2,APOC3,APOC2,ACOX3,BHMT,SLC25A20,DEGS1,CAV1,AKR1C3,PLA2G4C,CD74,PTPLAD1,ACSL5,CPT1A,CRAT,CPT2,CYB5A,MAPK14,ECI1,DBI,DLD,QKI,DECR1,ECH1,CAB39,EIF2B1,SLC27A3,FASN,SLC27A4,ACSL3,ACSL1,ACSL4,EPHX2,ACSF2,ETFDH,FAAH,PTGES2,MTOR,ECI2,ACAA2,LYPLA1,GOT1,ABHD5,MECR,CRYL1,APIP,GCDH,PT…
GO: Biological Process	GO:0044723	single-organism carbohydrate metabolic process	1.07e-16	208	607	DPM1,ACADM,PARP1,AGL,AKT1,B3GAT3,AKT2,ALDOC,ALDOA,GDPGP1,RGN,GALM,PGLS,SLC25A11,CANX,CALM3,CALR,SLC25A12,MLEC,ISYNA1,STT3B,SEC24D,CPT1A,PARP3,PARP2,GNPDA1,SLC25A13,CTBS,CYB5A,MAPK14,CRYAB,ALG12,ALG3,DDOST,DAD1,AIMP1,COLGALT1,ALG9,CYB5R3,INPP5K,MPDU1,H6PD,NCOR1,ENO2,SEC24C,FBP1,PTK2B,MAN1A2,SEC24A,FABP5,CHP1,MAN1B1,MTOR,FUCA2,NISCH,FUCA1,G6PD,FUT8,NUDT5,GAA,HIBADH,DCXR,GCLC,GLB1,GLA,SEC23A,CERCAM,…
GO: Biological Process	GO:0042060	wound healing	1.619e-16	218	647	A2M,ACTG1,ACTN1,ACTN4,PABPC4,ACTN2,AKT1,ALB,ALDOA,PROZ,PAPSS2,ANXA5,DOK2,MYOF,ANXA2,APOB,APOE,ARRB1,ARRB2,RHOG,RHOB,SERPINC1,SLC16A3,ATP2B4,ATP2A3,ATP2A2,ATP2B1,ATP1B1,DYSF,C1QBP,SERPING1,C9,CAPZA1,CAPZA2,CALU,CALM3,CASK,AP3B1,CAV1,CAPZB,ENTPD1,ENTPD2,CD9,CDK2,SIN3A,CDC42,SH2B1,CD44,CD59,EVL,DOCK11,COL1A1,CLU,MFN2,WDR1,CPB2,CRK,COL3A1,MAPK14,CSK,DCN,KIF3B,CFD,DSP,DOCK1,FGR,EHD1,FGG,FGB,FGA,SCUBE1…
GO: Biological Process	GO:0019318	hexose metabolic process	2.745e-16	112	267	ACADM,AGL,AKT1,AKT2,ALDOC,ALDOA,GDPGP1,GALM,PGLS,SLC25A11,CALM3,SLC25A12,CPT1A,GNPDA1,SLC25A13,MAPK14,CRYAB,AIMP1,INPP5K,H6PD,NCOR1,ENO2,FBP1,FABP5,MTOR,FUCA2,NISCH,FUCA1,G6PD,FUT8,GAA,HIBADH,DCXR,GLB1,GOT2,GOT1,AKR1A1,GANC,GALT,GALE,GALK2,GALK1,GFPT1,GBE1,GYS1,GYG1,SORBS1,GPD2,GPI,GPD1,GNMT,HK2,HK1,HK3,INPPL1,LDHA,B3GALTL,MAN2C1,MAN2A1,MAN2B1,MDH1,MDH2,MIF,MPI,LDHAL6A,OGDH,PCK2,PC,ADPGK,SMEK2,PP…
GO: Biological Process	GO:0042638	exogen	3.646e-16	86	184	AP3D1,AP1M1,AP1S2,AP2B1,AP1B1,AP2A2,AP2A1,AP1G1,CANX,CALR,AP3B1,CD74,PSMD6,SEC24D,AP2M1,CLTA,CLTC,CTSS,CTSD,ACTR1A,ACTR1B,CTSL1,PSMD14,PSME3,DCTN1,CYBB,DYNC1H1,DYNC1LI2,DYNC1I2,KIF3B,DNM2,PSMF1,SEC24C,SEC24A,KIF3A,DCTN4,SEC23A,SAR1B,SEC24B,PDIA3,DCTN2,HLA-DRA,HLA-DPA1,KLC1,KIF2A,KIF5A,ITGB5,ITGAV,LNPEP,SEC61A1,NCF2,PSMC5,PSMC4,PSMD1,PSMC6,PSMD3,PSMD2,PSMB8,PSMB9,PSMC2,PSMC1,PSME1,PSME2,PSMD7,PSMD…
GO: Biological Process	GO:0006511	ubiquitin-dependent protein catabolic process	3.927e-16	149	396	FBXO4,FBXW8,FBXO6,AKT1,SQSTM1,CDC16,USP13,ARRB1,ARRB2,BUB3,USP8,USP10,USP14,FBXO7,ARIH1,HECTD1,USP11,USP9X,CUL4B,CUL4A,CUL3,CUL2,CUL1,HERC4,CDC23,CDK2,CDK1,DERL1,USP34,STT3B,CUL7,RNF40,PSMD6,USP15,CLU,SUFU,HDAC6,HUWE1,UCHL5,UBR5,PSMD14,PSME3,DDB1,LRRK2,HECTD3,DAB2,TRIP12,CYLD,TBL1XR1,UBE4A,PSMF1,PTK2B,OS9,MAN1B1,ERLIN2,FAF1,ATE1,CRBN,GCLC,GNB2L1,DERL2,STUB1,UBE4B,USP39,ERLIN1,ERLEC1,HSP90AB1,HSPA…
GO: Biological Process	GO:0051248	negative regulation of protein metabolic process	4.287e-16	180	509	A2M,ADAR,NOC2L,AKT1,EIF2B5,EIF2B4,EIF2B3,CDC16,APOA4,APOE,AATF,ARRB1,ARRB2,BUB3,BAK1,BAX,SERPING1,CALR,CAV1,CDC23,SIN3A,CD59,EIF4A3,CDKN1B,PSMD6,CIRBP,SUFU,HDAC6,TAOK3,CTBP1,UBR5,PSMD14,PSME3,DDX3X,DAPK3,TRIP12,DNMT1,ITM2B,INPP5K,PSMF1,ATG5,BAG5,RAB23,DUSP9,DUSP3,PPM1F,EGFR,EIF2B1,CLN8,EPRS,F2,CHP1,G6PD,FLNA,FMR1,GLG1,GCLC,SYNCRIP,VPS28,GNB2L1,GNAQ,GMFB,NDUFA13,SNX6,GSTP1,MGEA5,IGF2BP3,IGF2BP2,GP…
GO: Biological Process	GO:0005996	monosaccharide metabolic process	7.099e-16	120	297	ACADM,AGL,AKT1,AKT2,ALDOC,ALDOA,GDPGP1,RGN,GALM,PGLS,SLC25A11,CALM3,SLC25A12,CPT1A,GNPDA1,SLC25A13,CYB5A,MAPK14,CRYAB,AIMP1,CYB5R3,INPP5K,H6PD,NCOR1,ENO2,FBP1,FABP5,MTOR,FUCA2,NISCH,FUCA1,G6PD,FUT8,NUDT5,GAA,HIBADH,DCXR,GCLC,GLB1,GOT2,GOT1,AKR1A1,GANC,GALT,GALE,GALK2,GALK1,GFPT1,GBE1,GYS1,GYG1,SORBS1,GPD2,GPI,GPD1,GNMT,HK2,HK1,HK3,DHDH,INPPL1,LDHA,B3GALTL,MAN2C1,MAN2A1,MAN2B1,MDH1,MDH2,MIF,MPI,LD…
GO: Biological Process	GO:0043086	negative regulation of catalytic activity	8.931e-16	212	633	A2M,SERPINA3,ADAR,AGT,AKT1,AKT2,CDC16,AMBP,ANXA3,AIP,ANXA1,ANXA2,APOA2,APOE,APOC3,APOC2,ARRB1,ARRB2,BUB3,SERPINC1,USP14,PRDX5,RECK,SERPING1,CAST,CALU,SERPINA6,SERPINH1,CAV1,POT1,CDC23,CD44,CDKN1B,PSMD6,CNN3,HDAC6,DNAJB6,FARP1,TAOK3,CSTB,UCHL5,PPP1R14A,CRYAB,PSMD14,PSME3,MPHOSPH10,CSK,LRRK2,DDX3X,TIPRL,NQO1,INPP5K,PSMF1,ECM1,BAG5,DUSP9,DUSP3,DPEP1,SERPINB1,PPM1F,KIAA0430,PAPLN,TMED2,PRDX3,CLN8,CHP…
GO: Biological Process	GO:0002474	antigen processing and presentation of peptide antigen via MHC class I	1.782e-15	57	102	BLMH,CANX,CALR,PSMD6,SEC24D,CTSS,PSMD14,PSME3,CYBB,PSMF1,ERAP1,NPEPPS,SEC24C,SEC24A,SEC23A,SAR1B,SEC24B,PDIA3,ITGB5,ITGAV,LNPEP,SEC61A1,NCF2,ERAP2,PSMC5,PSMC4,PSMD1,PSMC6,PSMD3,PSMD2,PSMB8,PSMB9,PSMC2,PSMC1,PSME1,PSME2,PSMD7,PSMD11,PSMD12,PSMB6,PSMB7,PSMB4,PSMB5,PSMB2,PSMB3,PSMA7,PSMB1,PSMA5,PSMA3,PSMA4,PSMA1,SEC13,RPS27A,SEC31A,TPP2,BAG6,PSME4
GO: Biological Process	GO:0034660	ncRNA metabolic process	1.787e-15	122	307	AARS,RRP9,YARS,ELAC2,CARS,PNPT1,INTS7,GEMIN5,PARS2,EIF4A3,C22orf28,SRRT,TRMT6,NOP58,FARSB,WDR77,MPHOSPH10,NOC4L,NOLC1,DARS,AIMP1,QTRTD1,NOL9,NARS2,DKC1,GEMIN6,NUDT16,WBP11,CARS2,FARSA,GEMIN4,PUS1,POP1,EPRS,TARS2,FBL,UTP14A,POLG2,DDX20,FRG1,WDR36,INTS5,UTP18,PRMT5,TRNT1,GARS,YARS2,WARS2,NPM3,FARS2,HARS,HSD17B10,TBL3,NOP56,RPP30,UTP20,IARS,KARS,SMAD2,SMAD3,URM1,TRMT1L,INTS2,AARS2,PPA2,NOL6,INTS3,MA…
GO: Biological Process	GO:0031399	regulation of protein modification process	2.115e-15	329	1103	FBXO4,IQGAP1,NRP1,ACADVL,RIPK1,ADAR,ADCY3,ADD1,NOC2L,ADRBK2,AGT,AKT1,SQSTM1,AIF1,AKT2,CDC16,SPAG9,APOE,ARAF,RPS6KA4,ARRB1,ARRB2,BUB3,ATP6V0D1,BAK1,BAX,NIPBL,BCL2,NCK2,FZD1,C5,CALR,PIAS1,CUL1,CAV1,SPDYA,LAMTOR3,PRKD2,CDC23,CDK2,SIN3A,CDC42,CDK1,CD81,CD74,CD44,CHI3L1,PTPLAD1,MLL4,CDK9,CDKN1B,CUL7,CCR1,PSMD6,CLU,SUFU,TPP1,ABI1,CRK,RAD50,TAOK3,CTBP1,PDIA6,UBR5,MAPK14,PSMD14,CSNK2B,PSME3,CSPG4,CSK,VAP…
GO: Biological Process	GO:0009167	purine ribonucleoside monophosphate metabolic process	2.507e-15	28	33	ADA,ADK,ADSL,ADSS,ADSSL1,AK4,AK2,AK1,GMPS,AMPD3,AMPD2,APRT,ATIC,GMPR2,CECR1,GART,GUK1,AK3,PAICS,HPRT1,IMPDH2,IMPDH1,NT5E,PPAT,PRPS1,PFAS,PRPS2,NT5C2
GO: Biological Process	GO:0044092	negative regulation of molecular function	2.824e-15	252	795	A2M,SERPINA3,ACTN2,ADAR,AGT,AKT1,AKT2,CDC16,AMBP,SPAG9,ANXA3,AIP,ANXA1,ANXA2,APOA2,APOE,APOC3,APOC2,ARRB1,ARRB2,BUB3,ASPH,SERPINC1,USP14,PRDX5,BAX,RECK,SERPING1,CAST,CALU,CALM3,SERPINA6,SERPINH1,CAV1,CAT,POT1,CDC23,SIN3A,CD44,CDKN1B,PSMD6,CNN3,SUFU,HDAC6,DNAJB6,FARP1,TAOK3,CSTB,UCHL5,PPP1R14A,CRYAB,PSMD14,PSME3,MPHOSPH10,CSK,LRRK2,DDX3X,DAB2,CYLD,TIPRL,SLC9A3R1,NQO1,RSF1,INPP5K,PSMF1,ECM1,BAG5,DU…
GO: Biological Process	GO:0051258	protein polymerization	3.487e-15	81	174	ADD1,AIF1,WASL,ARF6,ARHGAP6,NCK2,CAPG,CAPZA1,CAPZA2,CAV1,CAPZB,EVL,CDKN1B,ARPC2,ACTR3,ARPC3,ARPC1B,ARPC4,DNM1L,DIAPH1,DIAPH2,DLG1,TUBAL3,PTK2B,FGG,FGB,FER,FGA,FES,FKBP4,TRPV4,MTOR,CORO1A,TRIOBP,CDC42EP2,TUBA1B,TUBB4B,TUBB3,HCK,NCKAP1L,HCLS1,ARFGEF1,GSN,GRB2,ARPC1A,ARPC5L,SPTBN4,JAK2,PREX1,STMN1,TUBB2B,MAP1B,MAPT,MTPN,ACTR3B,NCK1,SEPT2,TMOD3,PFN2,PFN1,RDX,PYCARD,RASA1,TWF1,RAC1,TBCD,SPTB,SPTBN1,SP…
GO: Biological Process	GO:0006897	endocytosis	3.976e-15	150	409	ABCA1,ABR,ACTN4,ADD1,SNX3,SNX4,ADRBK1,ADRBK2,AP1S2,AP2B1,MTMR2,AP1B1,AP2A2,AP2A1,AP1G1,GAPVD1,AHSG,AIF1,BIN1,ANXA3,ANXA11,APOB,APOE,APOC3,APOC2,WASL,ARF6,ARRB1,ARRB2,RABEP1,PICALM,CLTCL1,PIP5K1A,EEA1,CANX,CALR,AP3B1,CBL,CAV1,CD14,ZFYVE16,SNX17,ANKFY1,ELMO1,CETP,MRC2,ATP6V1H,CLTA,CLTC,TOM1,UNC13D,WASF2,FLOT1,CSK,SNX9,PDLIM7,MAPKAPK2,DAB2,TRIP10,DNM2,DNM1,DOCK2,DOCK1,CTTN,CLINT1,FGR,EHD1,ITSN2,RUFY…
GO: Biological Process	GO:0010608	posttranscriptional regulation of gene expression	5.333e-15	148	403	AARS,ABCF1,NAPG,ACO1,SERBP1,AKT1,EIF2B2,EIF2B5,EIF2B4,EIF2B3,AKT2,ANK2,APOA2,LIMD1,APEX1,USP13,AATF,FBXO7,RBM10,BCL2,NCK2,C1QBP,CALR,PRKRA,LSM14A,EIF3H,EIF3B,CDC42,EIF4A3,SRRT,TRMT6,CIRBP,THRAP3,CLU,RBM8A,CTNNB1,CTSH,MAPK14,DHX9,DDX3X,DDX1,DAPK3,MAPKAPK2,ISOC2,ITM2B,QKI,ELAVL1,EIF4B,EIF4G1,EIF4G2,EIF5,CDC73,EIF5B,EIF2S1,EIF2B1,PUM1,GCN1L1,PTK2B,FECH,HNRNPA0,ERBB2,EPRS,ETF1,NCKAP1,CHP1,MTOR,FLNA,F…
GO: Biological Process	GO:0051247	positive regulation of protein metabolic process	8.586e-15	287	942	FBXO4,ABCF1,IQGAP1,NRP1,ACADVL,RIPK1,ADCY3,ADD1,ADRBK2,AGT,AKT1,SQSTM1,AIF1,EIF2B5,AKT2,CDC16,SPAG9,APOA2,APOE,ARAF,RPS6KA4,ARRB1,ARRB2,ATP6V0D1,NIPBL,BCL2,FZD1,C1QBP,C6,C5,CALR,PIAS1,CUL4B,CUL4A,CUL1,CAV1,SPDYA,GGA1,LAMTOR3,PRKD2,CDC23,CDC42,CDK1,CD81,CD74,CD44,EIF4A3,CHI3L1,PTPLAD1,CDKN1B,CUL7,CCR1,PSMD6,CIRBP,CLU,TPP1,ABI1,CRK,RAD50,TAOK3,CTNNB1,CTBP1,PDIA6,MAPK14,PSMD14,CSNK2B,PSME3,CSPG4,CSK…
GO: Biological Process	GO:0033043	regulation of organelle organization	8.911e-15	186	546	FAM162A,ADD1,NOC2L,AKT1,CDC16,ANXA1,ANXA2,WASL,ARF6,RPS6KA4,ARRB1,ARHGAP6,BUB3,ARHGEF2,ATM,BID,BAK1,BAX,NIPBL,NCK2,DST,C1QBP,CAPG,CAPZA1,CAPZA2,CAV1,CAPZB,POT1,CDC23,SIN3A,CLIC4,CDC42,CDK11B,SH2B1,CDK13,KANK2,EVL,LIMA1,MLL4,CDK9,CDKN1B,HDAC6,CRK,ARPC2,ACTR3,ARPC3,ARPC1B,ARPC4,DNM1L,SORBS3,CTNNB1,CTBP1,UBR5,DAPK3,TRIP12,CYLD,DNMT1,DLG1,CENPV,INPP5K,ROCK2,NCOR1,ARHGEF10,PPM1F,CTR9,PTK2B,WDR61,FGR,F…
GO: Biological Process	GO:0018193	peptidyl-amino acid modification	9.441e-15	227	704	DPM1,NRP1,ACTL6A,CEP41,NOC2L,ADRBK1,AGT,AKT1,AKT2,PROZ,APOA2,ARAF,RPS6KA4,P4HA2,ARRB1,ARRB2,ASPH,ATM,FKBP10,TRRAP,BGN,BAK1,BAX,BCL2,BTK,CANX,CAMK2D,HAT1,CALR,CAV1,PRKD2,RUVBL1,SIN3A,CDC42,CD81,CD74,CD44,MLEC,CHI3L1,MLL4,STT3B,SPOCK2,DPH5,SEC24D,FKBP7,HDAC6,ABI1,AKT3,CREBBP,PPIF,CTBP1,ABI2,MAPK14,ALG12,ALG3,PRMT3,CSPG4,DCN,LRRK2,DDOST,MAPKAPK2,DAD1,GTF3C4,PPIG,ALG9,NMT2,INPP5K,RAB3D,SEC24C,PPM1F,C…
GO: Biological Process	GO:0048820	hair follicle maturation	9.606e-15	89	202	AP3D1,AP1M1,AP1S2,AP2B1,AP1B1,AP2A2,AP2A1,AP1G1,AKT1,CANX,CALR,AP3B1,CD74,PSMD6,SEC24D,AP2M1,CLTA,CLTC,CTSS,CTSD,ACTR1A,ACTR1B,CTSL1,PSMD14,PSME3,DCTN1,CYBB,DYNC1H1,DYNC1LI2,DYNC1I2,KIF3B,DNM2,PSMF1,SEC24C,SEC24A,KIF3A,DCTN4,SEC23A,SAR1B,SEC24B,PDIA3,DCTN2,HLA-DRA,HLA-DPA1,RBPJ,KLC1,KIF2A,KIF5A,ITGB5,ITGAV,LNPEP,MYO5A,SEC61A1,NCF2,PSMC5,PSMC4,PSMD1,PSMC6,PSMD3,PSMD2,PSMB8,PSMB9,PSMC2,PSMC1,PSME1,…
GO: Biological Process	GO:0009894	regulation of catabolic process	9.729e-15	193	573	ARFGAP3,IQGAP1,MTMR2,AKT1,ARHGEF7,ALDH1A1,AKT2,BIN1,APOA4,APOA2,APOE,APOC3,APOC2,USP13,ARRB1,ARRB2,ARHGAP6,ARHGAP5,ARHGAP4,ARHGAP1,RHOG,HGS,RGN,USP10,USP14,RAB3GAP2,BCL2,PIP5K1A,TBC1D10B,CUL4B,CUL4A,PKP4,GGA1,PNPT1,RIC8A,CDC42,TBC1D5,DOCK4,PTPLAD1,CHN1,ACAP1,CDKN1B,GIT2,CNN3,TBC1D4,CLU,SUFU,ACSL5,CPT1A,CRK,DNAJB6,UCHL5,PSMD14,PSME3,SNX9,LRRK2,DAPK3,DAB2,DBI,TBC1D17,ARHGEF6,DOCK1,NCOR1,ARHGEF10,SE…
GO: Biological Process	GO:0050878	regulation of body fluid levels	9.907e-15	205	619	A2M,ACTG1,ACTN1,ACTN4,PABPC4,ACTN2,ADA,AKT1,ALB,ALDOA,PROZ,PAPSS2,ANXA5,ANXA7,DOK2,ANXA2,APOB,APOE,APRT,ARRB1,ARRB2,RHOG,RHOB,SERPINC1,SLC16A3,ATP2B4,ATP2A3,ATP2A2,ATP2B1,ATP1B1,BCAT2,C1QBP,SERPING1,C9,CAPZA1,CAPZA2,CALU,CALM3,AP3B1,CAV1,CAPZB,ENTPD1,ENTPD2,CD9,CDK2,SIN3A,CDH1,CDC42,SH2B1,CD59,EVL,RAB14,DOCK11,COL1A1,CLU,MFN2,WDR1,CPB2,CRK,COL3A1,COPA,MAPK14,CSK,KIF3B,CFD,INPP5K,DOCK1,FGR,EHD1,FG…
GO: Biological Process	GO:0030168	platelet activation	1.027e-14	96	225	A2M,ACTN1,ACTN4,ACTN2,AKT1,ALB,ALDOA,APOE,ARRB1,ARRB2,RHOG,RHOB,SERPING1,CALU,CALM3,ENTPD1,ENTPD2,CD9,EVL,COL1A1,CLU,WDR1,CRK,COL3A1,MAPK14,CSK,CFD,FGG,FGB,FGA,F13A1,F2,FLNA,FN1,VAV3,CAP1,GNAQ,GNB1,GNAI1,GNAI2,GNAI3,GNA11,ABCC4,GNA13,GRB2,HRG,HSPA5,KNG1,ITPR2,ITPR1,MGLL,LYN,LCP2,LAMP2,FERMT3,DAGLB,MAPK3,MAPK1,PRKG1,PRKCA,PRKCB,PFN1,PDGFRA,PDPK1,SERPINF2,PLEK,PLG,PLCG2,PIK3CA,PIK3R1,SERPINA1,SERPI…
GO: Biological Process	GO:0009126	purine nucleoside monophosphate metabolic process	1.146e-14	28	34	ADA,ADK,ADSL,ADSS,ADSSL1,AK4,AK2,AK1,GMPS,AMPD3,AMPD2,APRT,ATIC,GMPR2,CECR1,GART,GUK1,AK3,PAICS,HPRT1,IMPDH2,IMPDH1,NT5E,PPAT,PRPS1,PFAS,PRPS2,NT5C2
GO: Biological Process	GO:0031124	mRNA 3'-end processing	1.341e-14	48	81	PNPT1,CNOT10,SRSF9,EIF4A3,DHX38,PCF11,RBM8A,CSTF3,CSTF1,CDC40,ALYREF,SRSF11,CPSF7,EIF4B,EIF4G1,CDC73,RNPS1,PAPOLA,AHCYL1,CPSF6,NUDT21,SRRM1,PAIP1,GRSF1,U2AF2,PABPC1,FIP1L1,UPF3B,MAGOH,MLH1,CNOT7,NCBP1,PAPOLG,CPSF1,CNOT3,CNOT2,SRSF7,SRSF1,SRSF2,SRSF5,SRSF3,SRSF4,PAF1,TNKS1BP1,CNOT1,U2AF1,CPSF2,CSTF2T
GO: Biological Process	GO:0015931	nucleobase-containing compound transport	1.526e-14	75	159	SLC25A4,THOC5,KHSRP,UPF2,RAE1,PNPT1,AHCTF1,SRSF9,EIF4A3,DHX38,THOC6,CKAP5,NUPL1,G3BP2,MVP,NUP153,RBM8A,NUP35,THOC1,NUP37,LRPPRC,CDC40,DDX39A,ALYREF,SRSF11,QKI,NUP155,NUP93,RNPS1,NUP50,XPOT,FMR1,NUPL2,NUP85,GLE1,NXF1,SRRM1,HTT,KHDRBS1,AGFG1,HNRNPA2B1,DDX19B,U2AF2,UPF3B,MAGOH,HNRNPA1L2,NUP88,MYO1C,THOC2,NCBP1,NUP107,CPSF1,NUP133,UPF1,RAN,SEH1L,SRSF7,SRSF1,SRSF2,SRSF5,SRSF3,SRSF4,SEC13,CASC3,XPO1,NU…
GO: Biological Process	GO:0007049	cell cycle	2.356e-14	410	1460	FBXO6,CRADD,CEP41,ADCY3,MBD4,AKT1,AK1,AIF1,AKT2,CDC16,PHGDH,NAE1,ANXA11,ANK3,ANXA1,UBA3,APEX1,WASL,AATF,ARL3,BUB3,RHOB,ARHGEF2,ZW10,ATM,SMC3,USP8,SART1,TRRAP,SUN2,CLTCL1,BID,BAK1,BAX,NIPBL,USP9X,SMC1A,BCL2,DST,CAMK2D,CAMK2G,CAST,CALM3,CALR,CUL4B,CUL4A,CUL3,CUL2,CUL1,GIGYF2,PKP4,OFD1,SPDYA,PNPT1,NEK7,CDC23,AHCTF1,INTS7,CDK2,CDK4,CDK6,RUVBL1,SIN3A,CDC42,CDK11B,CDC5L,SEPT7,SH2B1,CDK1,CDK13,KANK2,CHD…
GO: Biological Process	GO:0006091	generation of precursor metabolites and energy	2.766e-14	164	469	SUCLG1,SUCLA2,IQGAP1,ACACA,ACADM,ACADVL,ACOX1,ACO2,ACO1,ADCY3,ADSL,AGL,AKT1,AKT2,ALDOC,ALDOA,SLC25A4,SLC25A5,SLC25A6,ATP5C1,ATP5A1,ATP5J,BAX,TXN2,CMAHP,CALM3,CAT,PNPT1,SPCS3,SLC25A12,THTPA,COX7A1,GNPDA1,COX6B1,COX4I1,SLC25A13,CYB5A,CS,TBRG4,CYBB,CYC1,TXNL1,COX5A,DLD,DLST,INPP5K,NCOR1,ENO2,FBP1,FASN,FECH,FDXR,FH,GNB4,ME3,ETFDH,ETFB,ETFA,MTOR,GAA,CYB5B,GNAS,GNB1,GNB2,NDUFA13,GFPT1,GBAS,GBE1,GYS1,GY…
GO: Biological Process	GO:0007265	Ras protein signal transduction	3.447e-14	154	433	ARFGAP3,ABCA1,ABR,CTNNAL1,GBF1,SQSTM1,ARHGEF7,AIF1,ALDH1A1,AKT2,DOK2,APOE,APOC3,ARF6,ARRB1,ARHGAP6,ARHGAP5,ARHGAP4,ARHGAP1,ARHGDIB,ARHGDIA,RHOG,RHOB,ARHGEF2,ARHGEF1,USP8,PIP5K1A,CAMK2D,TBC1D10B,CUL3,PKP4,CDK2,CDC42,CDK1,TBC1D5,DOCK4,PTPLAD1,CHN1,ACAP1,ARHGEF11,ELMO1,GIT2,G3BP2,TBC1D4,IQSEC1,MFN2,CRKL,CRK,WASF2,FARP1,G3BP1,MAPK14,FLOT1,MAPKAPK2,CYTH1,TBC1D17,ARHGEF6,ROCK2,DOCK2,ARHGEF10,FBP1,PTK2B…
GO: Biological Process	GO:0007264	small GTPase mediated signal transduction	3.768e-14	217	673	A2M,ARFGAP3,ABCA1,IQGAP1,ABR,CTNNAL1,GBF1,GAPVD1,SQSTM1,ARHGEF7,AIF1,ALDH1A1,AKT2,DOK2,APOE,APOC3,ARF5,ARF6,ARRB1,ARL3,ARL1,ARHGAP6,ARHGAP5,ARHGAP4,ARHGAP1,ARHGDIB,ARHGDIA,RHOG,RHOB,ARHGEF2,ARHGEF1,USP8,PIP5K1A,CAMK2D,TBC1D10B,CDC42BPA,CUL3,PKP4,CDK2,CDC42,CDK1,TBC1D5,DOCK4,PTPLAD1,CHN1,ACAP1,ARHGEF11,ELMO1,RAB14,DOCK11,GIT2,G3BP2,TBC1D4,IQSEC1,MFN2,ARHGAP25,CRKL,CRK,DNAJC27,WASF2,FARP1,G3BP1,ARF…
GO: Biological Process	GO:0009112	nucleobase metabolic process	3.783e-14	42	67	ADA,ADK,ADSL,ADSS,ADSSL1,GMPS,AMPD3,AMPD2,APRT,ATIC,CAT,CDA,CRMP1,GMPR2,DCTD,DGUOK,TYMP,UPB1,DUT,CECR1,DPYSL3,DPYSL2,DPYD,GMPR,GART,DPYSL4,GPX1,PAICS,HPRT1,IMPDH2,IMPDH1,ALDH6A1,NT5E,PPAT,PRPS1,MAPK1,PFAS,SHMT1,NT5C2,UPP1,UMPS,NT5C
GO: Biological Process	GO:0006901	vesicle coating	3.793e-14	30	39	GBF1,AP2B1,AP1B1,ARCN1,PICALM,CUL3,SEC16A,SEC24D,COPA,COPB1,DAB2,COPB2,SEC24C,CLINT1,TMED10,TMED2,EPS15,SEC24A,SEC23A,SAR1B,SEC24B,HIP1,COPE,ARFGAP1,PIK3C2A,TMED9,SEC13,COPG1,SEC31A,FCHO2
GO: Biological Process	GO:0008154	actin polymerization or depolymerization	4.297e-14	66	134	ADD1,AIF1,WASL,ARF6,ARHGAP6,NCK2,CAPG,CAPZA1,CAPZA2,CAPZB,EVL,LIMA1,CFL2,ABI1,ARPC2,ACTR3,ARPC3,ARPC1B,ARPC4,ABI2,DIAPH1,DIAPH2,DLG1,PTK2B,FER,MTOR,CORO1A,TRIOBP,CDC42EP2,HCK,NCKAP1L,HCLS1,ARFGEF1,GSN,GRB2,ARPC1A,ARPC5L,SPTBN4,JAK2,PREX1,MTPN,ACTR3B,MICAL1,NCK1,TMOD3,PFN2,PFN1,ENAH,PLEK,RDX,PYCARD,RASA1,TWF1,RAC1,SSH1,SSH3,SPTB,SPTBN1,SPTA1,SPTAN1,SPTBN2,SCIN,WAS,VASP,TPM1,KANK1
GO: Biological Process	GO:0031397	negative regulation of protein ubiquitination	6.759e-14	54	100	CDC16,ARRB1,ARRB2,BUB3,CAV1,CDC23,PSMD6,SUFU,UBR5,PSMD14,PSME3,TRIP12,PSMF1,ATG5,BAG5,CHP1,GCLC,VPS28,ANAPC1,ANAPC4,NXN,PML,PSMC5,PSMC4,PSMD1,PSMC6,PSMD3,PSMD2,PSMB8,PSMB9,PSMC2,PSMC1,PSME1,PSME2,PSMD7,PSMD11,PSMD12,PSMB6,PSMB7,PSMB4,PSMB5,PSMB2,PSMB3,PSMA7,PSMB1,PSMA5,PSMA3,PSMA4,PSMA1,GTPBP4,RPS27A,TNFAIP3,USP4,UFL1
GO: Biological Process	GO:0051640	organelle localization	7.15e-14	82	185	VPS33B,SNAP23,GBF1,ALB,ARCN1,WASL,ARHGEF2,ZW10,SUN2,CDC42BPA,CUL3,CDC23,CDC42,SEC16A,SEC24D,MFN2,HDAC6,ACTR2,ACTR3,COPA,COPB1,LRPPRC,RAB11B,LRRK2,COPB2,DYNC1LI2,KIF3B,DMD,SEC24C,RHOT2,TMED10,TMED2,SEC24A,KIF3A,TACC3,STK25,SEC23A,SAR1B,GOLGA2,SEC24B,NUDC,HTT,YKT6,ASPM,KIF5B,COPE,MTM1,MAP1B,MAP4,MAPT,MLH1,NUMA1,PCM1,MYH9,MYO5A,SEPT5,MAP2K1,PLXNA2,ARFGAP1,SEH1L,PTK2,KIF13A,RAB27A,PVRL2,TMED9,SEC13,R…
GO: Biological Process	GO:0032270	positive regulation of cellular protein metabolic process	8.803e-14	264	865	FBXO4,ABCF1,IQGAP1,NRP1,ACADVL,RIPK1,ADCY3,ADD1,ADRBK2,AGT,AKT1,SQSTM1,AIF1,EIF2B5,AKT2,CDC16,SPAG9,APOE,ARAF,RPS6KA4,ARRB1,ARRB2,ATP6V0D1,NIPBL,BCL2,FZD1,C1QBP,C5,CALR,PIAS1,CUL1,CAV1,SPDYA,LAMTOR3,PRKD2,CDC23,CDC42,CDK1,CD81,CD74,CD44,EIF4A3,CHI3L1,PTPLAD1,CUL7,CCR1,PSMD6,CIRBP,CLU,TPP1,ABI1,CRK,RAD50,TAOK3,CTNNB1,CTBP1,PDIA6,MAPK14,PSMD14,CSNK2B,PSME3,CSPG4,CSK,VAPB,DCTN1,LRRK2,DDX3X,MAPKAPK2,…
GO: Biological Process	GO:1901605	alpha-amino acid metabolic process	1.608e-13	85	197	HIBCH,KYNU,ADSS,EIF2B2,EIF2B4,PHGDH,GGH,GMPS,NFS1,ASL,ALDH7A1,BHMT,BCAT2,KMO,CCBL1,ALDH4A1,COMT,CTPS1,CSAD,DNMT1,DNMT3A,DLD,DLST,SARDH,DPEP1,EIF2B1,FAH,ASRGL1,PADI2,HIBADH,THNSL1,GLS,GCLC,GOT2,GOT1,APIP,GLUL,GART,GAMT,GFPT1,GCDH,GSTZ1,HTT,GNMT,HMGCL,IVD,DTD2,ACAD8,MTHFD1,MTHFR,MTAP,MSRA,MUT,CTPS2,MTR,MECP2,ALDH6A1,MCCC1,OAT,OGDH,PCBD1,MCCC2,PPAT,PFAS,SRR,ALDH18A1,QDPR,CCBL2,SMS,SLC1A3,SHMT1,SHMT2…
GO: Biological Process	GO:0051168	nuclear export	1.657e-13	61	122	ADAR,CALR,THOC5,UPF2,RAE1,SRSF9,DHX38,THOC6,RBM8A,THOC1,CDC40,DDX39A,NUTF2,ALYREF,SRSF11,NUP155,EMD,RNPS1,MALT1,AHCYL1,XPOT,CHP1,AKAP13,NUPL2,GLE1,NXF1,SRRM1,KHDRBS1,AGFG1,DDX19B,U2AF2,XPO5,UPF3B,MAGOH,THOC2,NCBP1,NUP107,CPSF1,LSG1,PRKACA,XPO4,NUP133,UPF1,RANGAP1,RAN,PTPN11,SRSF7,SRSF1,SRSF2,SRSF5,SRSF3,SRSF4,RPS15,XPO1,XPO7,U2AF1,CPSF2,NUP214,DDX39B,XPO6,NUP160
GO: Biological Process	GO:0022402	cell cycle process	1.848e-13	323	1112	FBXO6,CRADD,CEP41,ADCY3,MBD4,AKT1,AK1,AIF1,AKT2,CDC16,PHGDH,NAE1,ANK3,APEX1,WASL,BUB3,RHOB,ARHGEF2,ZW10,ATM,SMC3,USP8,SART1,TRRAP,SUN2,CLTCL1,BID,NIPBL,USP9X,SMC1A,BCL2,DST,CAMK2D,CAMK2G,CALR,CUL4B,CUL4A,CUL3,CUL2,CUL1,GIGYF2,PKP4,OFD1,SPDYA,PNPT1,NEK7,CDC23,AHCTF1,INTS7,CDK2,CDK4,CDK6,RUVBL1,SIN3A,CDC42,CDK11B,SEPT7,SH2B1,CDK1,CDK13,KANK2,CHD3,CDK9,CDKN1B,CETN2,CKAP5,NEDD1,BRCC3,PSMD6,MFN2,CLTC,…
GO: Biological Process	GO:0051493	regulation of cytoskeleton organization	2.15e-13	115	300	ADD1,WASL,ARF6,ARHGAP6,ARHGEF2,NCK2,DST,CAPG,CAPZA1,CAPZA2,CAV1,CAPZB,CLIC4,CDC42,KANK2,EVL,LIMA1,CDKN1B,HDAC6,CRK,ARPC2,ACTR3,ARPC3,ARPC1B,ARPC4,SORBS3,CTNNB1,DAPK3,CYLD,DLG1,INPP5K,ROCK2,ARHGEF10,PPM1F,PTK2B,FGR,FER,FES,FKBP4,TRPV4,HSPH1,MTOR,CEP250,CORO1A,TRIOBP,BAIAP2,CDC42EP2,DYNC1LI1,HCK,NCKAP1L,HCLS1,ARFGEF1,GSN,GRB2,ARPC1A,HRG,ARPC5L,SPTBN4,SYNPO,ILK,TAOK1,SMAD3,CHORDC1,LRP1,PREX1,STMN1,M…
GO: Biological Process	GO:0006900	membrane budding	2.206e-13	32	45	GBF1,AP2B1,AP1B1,ARCN1,WASL,PICALM,CUL3,SEC16A,SEC24D,COPA,COPB1,DAB2,COPB2,SEC24C,CLINT1,TMED10,TMED2,EPS15,SEC24A,SEC23A,SAR1B,SEC24B,HIP1,COPE,ARFGAP1,PIK3C2A,TMED9,SEC13,FNBP1L,COPG1,SEC31A,FCHO2
GO: Biological Process	GO:0006406	mRNA export from nucleus	2.625e-13	39	62	THOC5,UPF2,RAE1,SRSF9,DHX38,THOC6,RBM8A,THOC1,CDC40,DDX39A,ALYREF,SRSF11,NUP155,RNPS1,GLE1,NXF1,SRRM1,AGFG1,DDX19B,U2AF2,UPF3B,MAGOH,THOC2,NCBP1,NUP107,CPSF1,NUP133,UPF1,SRSF7,SRSF1,SRSF2,SRSF5,SRSF3,SRSF4,U2AF1,CPSF2,NUP214,DDX39B,NUP160
GO: Biological Process	GO:0043254	regulation of protein complex assembly	4.079e-13	89	213	NAPA,ADD1,WASL,ARF6,BID,BAX,NCK2,CAPG,CAPZA1,CAPZA2,CAV1,CAPZB,CDC42,BCLAF1,EVL,CDKN1B,CLU,HDAC6,ARPC2,ACTR3,ARPC3,ARPC1B,ARPC4,SNX9,DDX3X,DLG1,PTK2B,FER,FES,MPP7,FKBP4,MTOR,CORO1A,FAF1,TRIOBP,CRBN,CDC42EP2,GNB2L1,SH3GLB1,STUB1,HCK,HCFC1,NCKAP1L,HCLS1,ARFGEF1,GSN,GRB2,ARPC1A,HRG,IDE,ARPC5L,SPTBN4,PREX1,STMN1,MAP1B,MAPT,MTPN,ACTR3B,NCAM1,NCK1,TMOD3,PPM1A,PFN2,PFN1,PEX14,PLEK,CAND1,RDX,PYCARD,RALB,…
GO: Biological Process	GO:0016197	endosomal transport	4.413e-13	72	158	ABCA1,SNX4,AP1M1,MTMR2,AP2A1,SQSTM1,SPAG9,ARL1,DCLK1,RHOB,HGS,PICALM,EEA1,STX7,VPS51,STX10,CDC42,LRBA,ZFYVE16,SNX17,VTA1,RAB14,KIAA0196,DOPEY2,TOM1,ARFRP1,DAB2,GOSR1,VPS4B,VPS26A,EHD1,EPS15,FLNA,VPS28,VPS36,SNX6,HTT,YKT6,IGHM,M6PR,SNX27,LMAN1,MTM1,SNX8,MAP2K1,MAP2K2,MAPK3,MAPK1,ZFYVE20,TINAGL1,KIF16B,VPS35,SCYL2,PIK3C3,AKTIP,KIF13A,SNX1,TMED9,SORT1,RPS27A,SURF4,WAS,TSG101,KIAA1033,STAM,EHD4,EHD3,…
GO: Biological Process	GO:0022613	ribonucleoprotein complex biogenesis	4.532e-13	101	254	ABCF1,GNL3,PRPF31,LIMD1,AATF,RRP9,SART1,C1QBP,LSM14A,EIF3D,SRSF9,GEMIN5,EIF4A3,NOP58,CIRBP,PQBP1,CRNKL1,WDR77,MPHOSPH10,NOC4L,EFTUD1,NOLC1,DDX6,DDX3X,DDX1,NOL9,IPO4,DYNC1H1,DKC1,GEMIN6,NUDT16,WBP11,GEMIN4,SF3A3,TXNL4A,FBL,UTP14A,DDX20,FRG1,WDR36,GNL1,UTP18,PRMT5,CD2BP2,NPM3,SF3A1,USP39,CELF2,TBL3,NOP56,UTP20,PRPF19,PTBP2,LSM2,NOL6,EIF2A,MBNL1,PA2G4,CNOT7,NCBP1,NOP2,LSG1,EXOSC10,TSR1,IPO9,UTP6,NOB…
GO: Biological Process	GO:0010498	proteasomal protein catabolic process	4.661e-13	96	237	FBXO4,FBXO6,AKT1,CDC16,ARRB1,ARRB2,BUB3,USP14,CUL3,CUL1,CDC23,CDK2,CDK1,DERL1,STT3B,PSMD6,CLU,UCHL5,PSMD14,PSME3,DDB1,LRRK2,HECTD3,DAB2,TBL1XR1,PSMF1,OS9,MAN1B1,ERLIN2,FAF1,CRBN,GCLC,GNB2L1,DERL2,STUB1,GPX1,ERLIN1,ERLEC1,HSP90AB1,HSPA5,UBE2K,UBQLN4,ANAPC1,PCBP2,ANAPC4,PRKACA,PPP2CB,NPLOC4,PSMC5,PSMC4,PSMD1,PSMC6,PSMD3,PSMD2,PSMB8,PSMB9,PSMC2,PSMC1,PSME1,PSME2,PSMD7,PSMD11,PSMD12,PSMB6,PSMB7,PSMB4…
GO: Biological Process	GO:0030041	actin filament polymerization	6.188e-13	56	110	ADD1,AIF1,WASL,ARF6,ARHGAP6,NCK2,CAPG,CAPZA1,CAPZA2,CAPZB,EVL,ARPC2,ACTR3,ARPC3,ARPC1B,ARPC4,DIAPH1,DIAPH2,DLG1,PTK2B,FER,MTOR,CORO1A,TRIOBP,CDC42EP2,HCK,NCKAP1L,HCLS1,ARFGEF1,GSN,GRB2,ARPC1A,ARPC5L,SPTBN4,JAK2,PREX1,MTPN,ACTR3B,NCK1,TMOD3,PFN2,PFN1,RDX,PYCARD,RASA1,TWF1,RAC1,SPTB,SPTBN1,SPTA1,SPTAN1,SPTBN2,SCIN,WAS,TPM1,KANK1
GO: Biological Process	GO:0032271	regulation of protein polymerization	6.605e-13	60	122	ADD1,WASL,ARF6,NCK2,CAPG,CAPZA1,CAPZA2,CAV1,CAPZB,EVL,CDKN1B,ARPC2,ACTR3,ARPC3,ARPC1B,ARPC4,DLG1,PTK2B,FER,FES,FKBP4,MTOR,CORO1A,TRIOBP,CDC42EP2,HCK,NCKAP1L,HCLS1,ARFGEF1,GSN,GRB2,ARPC1A,ARPC5L,SPTBN4,PREX1,STMN1,MAP1B,MAPT,MTPN,ACTR3B,NCK1,TMOD3,PFN2,PFN1,RDX,PYCARD,RASA1,TWF1,RAC1,TBCD,SPTB,SPTBN1,SPTA1,SPTAN1,SPTBN2,SCIN,MAPRE1,VDAC2,TPM1,KANK1
GO: Biological Process	GO:0031400	negative regulation of protein modification process	7.078e-13	126	344	ADAR,NOC2L,AKT1,CDC16,APOE,ARRB1,ARRB2,BUB3,BAK1,BAX,CAV1,CDC23,SIN3A,CDKN1B,PSMD6,SUFU,TAOK3,CTBP1,UBR5,PSMD14,PSME3,TRIP12,DNMT1,INPP5K,PSMF1,ATG5,BAG5,DUSP9,DUSP3,PPM1F,CHP1,G6PD,GCLC,VPS28,GNB2L1,GNAQ,GMFB,SNX6,GSTP1,MGEA5,GPS1,PDCD4,HSPA4,IGBP1,KNG1,INPPL1,STK38,ILK,LYN,SMAD3,CHORDC1,WNK1,MECP2,MEN1,MLLT1,ANAPC1,PEBP1,PAK2,MICAL1,DEPTOR,ANAPC4,AIDA,NF1,NF2,DNAJC3,PRKAR1A,PRKCA,PPP2R4,PPP2CA,…
GO: Biological Process	GO:0030030	cell projection organization	7.546e-13	302	1036	NRP1,NRP2,AK7,ACTG1,ACTN2,CEP41,TCTN3,AP2B1,AP2A2,AP2A1,AKT1,ARHGEF7,AIF1,ALCAM,PHGDH,ANK2,ANK3,APOE,WASL,ARF6,RPS6KA4,ARL3,DCLK1,ARHGAP4,ARHGDIA,RHOG,RHOB,ARHGEF1,PICALM,ATXN10,BCL2,PIP5K1A,STK24,NCK2,DST,FZD1,C21orf2,CAPG,CACNB3,CAPZB,OFD1,NUMB,CDH11,PTPN23,CDH1,CDC42,SEPT7,SH2B1,CDK1,CD44,EVL,LIMA1,CHN1,ARHGEF11,FIG4,CNP,COL1A1,CNTN1,AP2M1,CLU,CLTA,CLTC,CRMP1,ABI1,ACTR3,COL5A2,COL6A1,COL6A2,CO…
GO: Biological Process	GO:1901698	response to nitrogen compound	9.009e-13	231	748	SERPINA3,AARS,ADA,ADCY3,KYNU,PARP1,AK4,AKT1,AHSG,EIF2B2,EIF2B5,EIF2B4,EIF2B3,AKT2,ALDOC,GGH,ANXA1,APOC3,ASPH,ATP1A2,ATP6V0D1,ATP2A2,BAG1,ATP6V1B1,ATP6V1B2,ATP6V0C,ATP6V0A1,ATP6V1E1,ATP6V1C1,BDH1,BCKDHB,BCL2,FZD1,PRKRA,CASP1,LAMTOR3,PEA15,CDK2,SIN3A,CDH1,CDA,CDK1,C2CD5,SRRT,ATP6V1H,COL1A1,TBC1D4,ACSL5,CRK,AKT3,COL5A2,COL6A1,COL4A6,COL4A1,COL3A1,CTNNA1,CTNNB1,ATP6V1D,CTSB,MAPK14,CSK,DDX1,DAG1,CYP11…
GO: Biological Process	GO:0015980	energy derivation by oxidation of organic compounds	9.477e-13	124	338	SUCLG1,SUCLA2,IQGAP1,ACACA,ACADM,ACADVL,ACO2,ACO1,ADCY3,ADSL,AGL,AKT1,AKT2,SLC25A4,SLC25A5,SLC25A6,ATP5C1,ATP5A1,ATP5J,BAX,CALM3,CAT,PNPT1,SPCS3,SLC25A12,COX6B1,COX4I1,SLC25A13,CS,TBRG4,CYC1,COX5A,DLD,DLST,INPP5K,FASN,FH,GNB4,ME3,ETFDH,ETFB,ETFA,MTOR,GAA,GNAS,GNB1,GNB2,NDUFA13,GFPT1,GBE1,GYS1,GYG1,PTGES3,ATP5L,SORBS1,MYBBP1A,AGPAT1,GNMT,IL6ST,IDH3G,IDH3B,IDH3A,IDH2,IDH1,ITPR2,ITPR1,MARCKS,LEPR,MA…
GO: Biological Process	GO:0051187	cofactor catabolic process	1.038e-12	30	42	SUCLG1,SUCLA2,ACO2,ACO1,AMBP,BLVRB,BLVRA,CBR1,CS,DLD,DLST,FH,ALDH1L1,HMOX2,HMOX1,IDH3G,IDH3B,IDH3A,IDH2,IDH1,NUDT12,MDH1,MDH2,OGDH,NCF2,PDHB,OGDHL,SDHA,MLYCD,NNT
GO: Biological Process	GO:0071695	anatomical structure maturation	1.216e-12	93	230	AP3D1,AP1M1,AP1S2,AP2B1,AP1B1,AP2A2,AP2A1,AP1G1,AKT1,ALDH1A2,RECK,CANX,CALR,AP3B1,CD74,PSMD6,SEC24D,AP2M1,CLTA,CLTC,CTSS,CTSD,ACTR1A,ACTR1B,CTSL1,PSMD14,PSME3,DCTN1,DAG1,CYBB,DYNC1H1,DYNC1LI2,DYNC1I2,KIF3B,DNM2,PSMF1,SEC24C,SEC24A,KIF3A,DCTN4,SEC23A,SAR1B,SEC24B,PDIA3,DCTN2,HLA-DRA,HLA-DPA1,RBPJ,KLC1,KIF2A,KIF5A,ITGB5,ITGAV,LNPEP,MMP2,MYO5A,SEC61A1,NCF2,PSMC5,PSMC4,PSMD1,PSMC6,PSMD3,PSMD2,PSMB8,P…
GO: Biological Process	GO:0051289	protein homotetramerization	1.231e-12	37	59	ACACA,ACADM,ACADS,ACADL,ACTN2,ALDH1A1,ALDOC,ALDOA,CAT,CDA,EVL,DNM1L,CRYZ,DECR1,FBP1,APOA1BP,GLS,DCXR,GFPT1,HSD17B10,GNMT,HPRT1,IDE,IMPDH2,PCBD1,PPAT,PEX14,PFKM,PFKP,PFKL,SRR,PEX5,SHMT1,SHMT2,THG1L,VASP,ALDH5A1
GO: Biological Process	GO:0043161	proteasomal ubiquitin-dependent protein catabolic process	1.371e-12	92	227	FBXO4,FBXO6,AKT1,CDC16,ARRB1,ARRB2,BUB3,CUL3,CUL1,CDC23,CDK2,CDK1,DERL1,STT3B,PSMD6,CLU,PSMD14,PSME3,DDB1,LRRK2,HECTD3,DAB2,TBL1XR1,PSMF1,OS9,MAN1B1,ERLIN2,FAF1,CRBN,GCLC,GNB2L1,DERL2,STUB1,ERLIN1,ERLEC1,HSP90AB1,HSPA5,UBE2K,UBQLN4,ANAPC1,PCBP2,ANAPC4,PPP2CB,NPLOC4,PSMC5,PSMC4,PSMD1,PSMC6,PSMD3,PSMD2,PSMB8,PSMB9,PSMC2,PSMC1,PSME1,PSME2,PSMD7,PSMD11,PSMD12,PSMB6,PSMB7,PSMB4,PSMB5,PSMB2,PSMB3,PSMA7…
GO: Biological Process	GO:0090407	organophosphate biosynthetic process	1.56e-12	184	566	DPM1,ABCA1,ACACA,MTMR1,ADA,ADCY3,KYNU,ADK,ADSL,ADSS,MTMR2,ADSSL1,AK4,AK2,AK1,ALDOA,GMPS,AMPD3,PAPSS2,PAPSS1,AMPD2,NFS1,APOA2,APOE,APRT,ATP1A3,ATP1A1,ATP1A2,ATM,ATIC,ATP5C1,ATP5A1,MTMR6,ATP2B4,ATP2A3,ATP2A2,ATP2B1,ATP1B1,ATP5J,PIP5K1A,GNPAT,PDXK,KMO,PPCDC,DGAT1,PLA2G4C,CD81,ISYNA1,IP6K1,FIG4,PIGT,LPGAT1,ACSL5,PIGK,SLC25A13,CTPS1,ALG12,DCTD,ALG9,DGUOK,GGPS1,PCYT1B,INPP5K,SPTLC2,DUT,CECR1,AKAP12,DPY…
GO: Biological Process	GO:0033365	protein localization to organelle	1.625e-12	178	543	ADAR,AP3D1,PARP1,AGT,AKT1,MCM3AP,ANK2,TIMM13,AIP,SLC25A6,ARL1,ZW10,SUN2,SAMM50,BID,BAX,FZD1,CALR,AP3B1,TOR1AIP1,SCARB2,SPCS3,AKR1C3,SIN3A,CDH1,CDK1,ZFYVE16,NCKIPSD,G3BP2,NOP58,GET4,TOMM70A,COL1A1,MFN2,SUFU,DNAJB6,ARFRP1,UBR5,MAPK14,NUTF2,ATG9A,NOLC1,DDOST,DAB2,DAG1,IPO4,CYLD,DIAPH1,RAB8B,PMPCB,NUP155,EMD,EGFR,OS9,CHP1,MTOR,NR5A1,TMEM173,FLNA,FAF1,RBPMS,TACC3,IPO11,TOMM40,TIMM44,GNAQ,SH3GLB1,TRNT1…
GO: Biological Process	GO:0006006	glucose metabolic process	1.848e-12	92	228	ACADM,AGL,AKT1,AKT2,ALDOC,ALDOA,GDPGP1,PGLS,SLC25A11,CALM3,SLC25A12,CPT1A,SLC25A13,MAPK14,CRYAB,AIMP1,INPP5K,H6PD,NCOR1,ENO2,FBP1,FABP5,MTOR,NISCH,G6PD,GAA,HIBADH,DCXR,GOT2,GOT1,AKR1A1,GANC,GFPT1,GBE1,GYS1,GYG1,SORBS1,GPD2,GPI,GPD1,GNMT,HK2,HK1,HK3,INPPL1,LDHA,MDH1,MDH2,MIF,LDHAL6A,OGDH,PCK2,PC,ADPGK,SMEK2,PPP1CA,PRKAG1,PRKACG,PRKAA1,PRKACB,PRKACA,PGD,PGAM1,PGM5,PGM1,PFKM,PFKP,PFKL,PDHB,ENPP1,PDK…
GO: Biological Process	GO:0010565	regulation of cellular ketone metabolic process	1.882e-12	77	178	ACADM,ACADL,ACADVL,AGT,AKT1,AKT2,ANXA1,APOA4,APOC3,APOC2,BHMT,SLC25A20,CAV1,AKR1C3,PSMD6,ACSL5,CPT1A,CPT2,COMT,CTNNB1,PSMD14,PSME3,DBI,NQO1,DLD,PSMF1,CAB39,NCOR2,FBP1,ACSL1,ACSL4,MTOR,GNMT,CAB39L,SMEK2,MAPK9,PRKAG1,PRKAA1,PRKAB2,PRKAB1,PDHB,PDK3,PDK2,SMEK1,PSMC5,PSMC4,PSMD1,PSMC6,PSMD3,PSMD2,PSMB8,PSMB9,PSMC2,PSMC1,PSME1,PSME2,PSMD7,PSMD11,PSMD12,PSMB6,PSMB7,PSMB4,PSMB5,PSMB2,PSMB3,PSMA7,PSMB1,PS…
GO: Biological Process	GO:0009118	regulation of nucleoside metabolic process	2.045e-12	110	291	ARFGAP3,IQGAP1,ARHGEF7,ALDH1A1,AKT2,BIN1,ARRB1,ARRB2,ARHGAP6,ARHGAP5,ARHGAP4,ARHGAP1,RHOG,RGN,RAB3GAP2,PIP5K1A,TBC1D10B,PKP4,RIC8A,TBC1D5,DOCK4,PTPLAD1,CHN1,ACAP1,GIT2,CNN3,TBC1D4,CRK,DNAJB6,SNX9,LRRK2,TBC1D17,ARHGEF6,DOCK1,ARHGEF10,PTK2B,TMED2,ERBB2,EPHB3,MTOR,FGD3,ADAP1,VAV3,CDC42EP2,GNB2L1,GNAQ,NCKAP1L,AGRN,ARFGEF1,ASAP1,AHSA1,ARHGAP35,AGFG1,PREX1,LLGL1,SNX18,ZC3HAV1,SMAP2,RALGAPA2,MYO9B,TBC1D…
GO: Biological Process	GO:0031123	RNA 3'-end processing	2.075e-12	50	95	PNPT1,CNOT10,SRSF9,EIF4A3,DHX38,PCF11,RBM8A,CSTF3,CSTF1,CDC40,ALYREF,SRSF11,CPSF7,EIF4B,EIF4G1,CDC73,RNPS1,PAPOLA,AHCYL1,CPSF6,NUDT21,TRNT1,SRRM1,PAIP1,GRSF1,U2AF2,PABPC1,FIP1L1,UPF3B,MAGOH,MLH1,CNOT7,NCBP1,PAPOLG,CPSF1,CNOT3,CNOT2,SRSF7,SRSF1,SRSF2,SRSF5,SRSF3,SRSF4,PAF1,RPS21,TNKS1BP1,CNOT1,U2AF1,CPSF2,CSTF2T
GO: Biological Process	GO:0006405	RNA export from nucleus	2.387e-12	42	73	THOC5,UPF2,RAE1,SRSF9,DHX38,THOC6,RBM8A,THOC1,CDC40,DDX39A,ALYREF,SRSF11,NUP155,RNPS1,XPOT,GLE1,NXF1,SRRM1,KHDRBS1,AGFG1,DDX19B,U2AF2,UPF3B,MAGOH,THOC2,NCBP1,NUP107,CPSF1,NUP133,UPF1,RAN,SRSF7,SRSF1,SRSF2,SRSF5,SRSF3,SRSF4,U2AF1,CPSF2,NUP214,DDX39B,NUP160
GO: Biological Process	GO:0071310	cellular response to organic substance	2.647e-12	405	1482	AARS,ABCA1,NRP1,NRP2,ACADVL,RIPK1,ADAR,TRADD,ADCY3,ADD1,PARP1,ADRBK1,AKT1,AHSG,AIF1,AKT2,ALAD,ALPL,ALDH1A2,APAF1,MYOF,ANXA1,APOB,APOE,PLOD3,RPS6KA4,ARRB1,ARRB2,FIBP,ATP6V0D1,ATP6V1B1,ATP6V1B2,ATP6V0C,ATP6V0A1,ATP6V1E1,ATP6V1C1,ARIH1,BAK1,BAX,USP9X,BCL2,FZD1,CAMK2D,CAMK2G,CALM3,CALR,PRKRA,CASK,PIAS1,LSM14A,CBL,CAV1,CASP1,RAE1,CAT,PNPT1,LAMTOR3,PRKD2,AKR1C3,CD14,CDK2,SIN3A,CDH1,CDK1,CD74,CD44,EIF4A…
GO: Biological Process	GO:0031401	positive regulation of protein modification process	2.9e-12	237	780	FBXO4,IQGAP1,NRP1,ACADVL,RIPK1,ADCY3,ADD1,ADRBK2,AGT,AKT1,SQSTM1,AIF1,AKT2,CDC16,SPAG9,ARAF,RPS6KA4,ARRB1,ARRB2,ATP6V0D1,NIPBL,BCL2,FZD1,C5,CALR,PIAS1,CUL1,CAV1,SPDYA,LAMTOR3,PRKD2,CDC23,CDC42,CDK1,CD81,CD74,CD44,CHI3L1,PTPLAD1,CUL7,CCR1,PSMD6,CLU,TPP1,ABI1,CRK,RAD50,TAOK3,CTBP1,PDIA6,MAPK14,PSMD14,CSNK2B,PSME3,CSPG4,CSK,VAPB,DCTN1,LRRK2,MAPKAPK2,DAB2,DNMT1,DLG1,PSMF1,CAB39,GOSR2,NCOR1,CTR9,EGFR,…
GO: Biological Process	GO:0044283	small molecule biosynthetic process	2.96e-12	161	481	SUCLA2,ACACA,ACADM,ACADL,ACAT1,ACADVL,KYNU,AGT,EIF2B2,ALDH9A1,ALDH1A1,EIF2B4,PHGDH,ALDH1A2,ALOX15,ALOX5,ANXA1,APOB,APOA4,APOA2,APOE,APOC3,APOC2,ASL,ATIC,ALDH7A1,RGN,BDH1,BHMT,BGN,BCAT2,DEGS1,CCBL1,ALDH4A1,AKR1C3,MTHFD1L,CD74,ISYNA1,PTPLAD1,IP6K1,CYB5R1,GGCT,RDH10,VCAN,CSPG4,DCN,CYP11A1,CYP27A1,CYP7B1,CYB5R3,QKI,GGPS1,PCYT1B,UPB1,SPTLC2,DPYD,EIF2B1,FASN,PTK2B,ACSL3,FDPS,FABP5,PTGES2,PADI2,G6PD,LPC…
GO: Biological Process	GO:0044242	cellular lipid catabolic process	3.114e-12	71	160	ACAA1,ACADM,ACADS,ACADL,ACADVL,ACOX1,AKT1,SGPL1,ABCD1,AKT2,APOB,APOA4,APOA2,APOC3,APOC2,ACOX3,AKR1C3,PLA2G4C,ACSL5,CPT1A,CRAT,CPT2,ECI1,DBI,DECR1,ECH1,PRDX6,SLC27A4,ETFDH,FAAH,MTOR,ECI2,ACAA2,GLA,ABHD5,GM2A,GALC,HADHB,HADH,HADHA,HSD17B4,HEXA,HEXB,MGLL,ACOT7,LIPE,MUT,PCCB,PCCA,NAGA,PPP1CC,PPP1CA,PRKACG,PRKACB,PRKACA,PPT1,ENPP2,SMPD4,PLCG1,PLCB3,PLD1,PLCG2,PLD2,ABCD3,PEX5,PLA2G15,AMACR,SCP2,MLYCD,A…
GO: Biological Process	GO:0006144	purine nucleobase metabolic process	3.713e-12	29	41	ADA,ADK,ADSL,ADSS,ADSSL1,GMPS,AMPD3,AMPD2,APRT,ATIC,CAT,GMPR2,DGUOK,CECR1,DPYD,GMPR,GART,GPX1,PAICS,HPRT1,IMPDH2,IMPDH1,NT5E,PPAT,PRPS1,PFAS,SHMT1,NT5C2,NT5C
GO: Biological Process	GO:0051174	regulation of phosphorus metabolic process	3.903e-12	378	1370	ARFGAP3,ABCA1,IQGAP1,NRP1,ACADVL,RIPK1,ADAR,ADCY3,ADD1,ADRBK2,AGT,AKT1,SQSTM1,ARHGEF7,AHSG,AIF1,ALDH1A1,AKT2,BIN1,SPAG9,APOE,APOC2,ARAF,RPS6KA4,ARRB1,ARRB2,ARHGAP6,ARHGAP5,ARHGAP4,ARHGAP1,RHOG,ATP6V0D1,RGN,RAB3GAP2,BAK1,BAX,BCL2,PIP5K1A,NCK2,FZD1,C5,TBC1D10B,CALR,PKP4,CAV1,SPDYA,LAMTOR3,PRKD2,RIC8A,CDC42,CDA,CDK1,CD81,CD74,CD44,CHI3L1,TBC1D5,DOCK4,PTPLAD1,CHN1,ACAP1,CDKN1B,CUL7,GIT2,CCR1,CNN3,TBC…
GO: Biological Process	GO:0033121	regulation of purine nucleotide catabolic process	3.913e-12	109	290	ARFGAP3,IQGAP1,ARHGEF7,ALDH1A1,AKT2,BIN1,ARRB1,ARRB2,ARHGAP6,ARHGAP5,ARHGAP4,ARHGAP1,RHOG,RGN,RAB3GAP2,PIP5K1A,TBC1D10B,PKP4,RIC8A,TBC1D5,DOCK4,PTPLAD1,CHN1,ACAP1,GIT2,CNN3,TBC1D4,CRK,DNAJB6,SNX9,LRRK2,TBC1D17,ARHGEF6,DOCK1,ARHGEF10,PTK2B,TMED2,ERBB2,EPHB3,MTOR,FGD3,ADAP1,VAV3,CDC42EP2,GNB2L1,GNAQ,NCKAP1L,AGRN,ARFGEF1,ASAP1,AHSA1,ARHGAP35,AGFG1,PREX1,LLGL1,SNX18,ZC3HAV1,SMAP2,RALGAPA2,MYO9B,TBC1D…
GO: Biological Process	GO:0052547	regulation of peptidase activity	4.003e-12	119	326	A2M,SERPINA3,RIPK1,FAM162A,TRADD,AGT,AKT1,AKT2,AMBP,APAF1,ARRB1,SERPINC1,AIFM1,USP14,PRDX5,BAK1,BAX,FOXL2,RECK,SERPING1,C6,C9,CAST,SERPINA6,SERPINH1,CAV1,CASP1,CASP7,CASP8,CDH1,CD44,CDKN1B,PDCD6,DNAJB6,CSTB,UCHL5,CTSH,CRYAB,PSMD14,PSME3,DDX3X,PSMF1,ECM1,DPEP1,SERPINB1,PPM1F,FBLN1,PAPLN,PRDX3,CLPX,FN1,ADRM1,SERPINA10,GNB2L1,RPS27L,FIS1,ITIH5,SERPIND1,HTT,GPX1,GPI,HRG,HIP1,HTRA2,IGBP1,IFI16,KNG1,JA…
GO: Biological Process	GO:0031329	regulation of cellular catabolic process	4.186e-12	166	502	ARFGAP3,IQGAP1,MTMR2,AKT1,ARHGEF7,ALDH1A1,AKT2,BIN1,APOA4,APOE,APOC3,APOC2,USP13,ARRB1,ARRB2,ARHGAP6,ARHGAP5,ARHGAP4,ARHGAP1,RHOG,RGN,USP10,USP14,RAB3GAP2,BCL2,PIP5K1A,TBC1D10B,PKP4,PNPT1,RIC8A,TBC1D5,DOCK4,PTPLAD1,CHN1,ACAP1,GIT2,CNN3,TBC1D4,CLU,SUFU,ACSL5,CPT1A,CRK,DNAJB6,UCHL5,PSMD14,PSME3,SNX9,LRRK2,DAPK3,DAB2,DBI,TBC1D17,ARHGEF6,DOCK1,NCOR1,ARHGEF10,FBP1,PTK2B,TMED2,ERBB2,EPHB3,MTOR,FGD3,ADA…
GO: Biological Process	GO:0030811	regulation of nucleotide catabolic process	5.031e-12	109	291	ARFGAP3,IQGAP1,ARHGEF7,ALDH1A1,AKT2,BIN1,ARRB1,ARRB2,ARHGAP6,ARHGAP5,ARHGAP4,ARHGAP1,RHOG,RGN,RAB3GAP2,PIP5K1A,TBC1D10B,PKP4,RIC8A,TBC1D5,DOCK4,PTPLAD1,CHN1,ACAP1,GIT2,CNN3,TBC1D4,CRK,DNAJB6,SNX9,LRRK2,TBC1D17,ARHGEF6,DOCK1,ARHGEF10,PTK2B,TMED2,ERBB2,EPHB3,MTOR,FGD3,ADAP1,VAV3,CDC42EP2,GNB2L1,GNAQ,NCKAP1L,AGRN,ARFGEF1,ASAP1,AHSA1,ARHGAP35,AGFG1,PREX1,LLGL1,SNX18,ZC3HAV1,SMAP2,RALGAPA2,MYO9B,TBC1D…
GO: Biological Process	GO:0006369	termination of RNA polymerase II transcription	5.036e-12	31	46	SRSF9,DHX38,PCF11,RBM8A,CSTF3,CSTF1,CDC40,ALYREF,SRSF11,CPSF7,RNPS1,PAPOLA,NUDT21,SRRM1,U2AF2,UPF3B,MAGOH,NCBP1,CPSF1,SNRPG,SNRPD3,SNRPE,SNRPB,SRSF7,SRSF1,SRSF2,SRSF5,SRSF3,SRSF4,U2AF1,CPSF2
GO: Biological Process	GO:0009161	ribonucleoside monophosphate metabolic process	5.036e-12	31	46	ADA,ADK,ADSL,ADSS,ADSSL1,AK4,AK2,AK1,GMPS,AMPD3,AMPD2,APRT,ATIC,GMPR2,CECR1,DPYD,GART,GUK1,AK3,PAICS,HPRT1,IMPDH2,IMPDH1,NT5E,PPAT,PRPS1,PFAS,PRPS2,NT5C2,UPP1,UMPS
GO: Biological Process	GO:0007030	Golgi organization	5.036e-12	31	46	ARL1,COG4,GORASP2,ATL3,CDC42,GOLGA5,CLTC,CTBP1,COG1,TMED10,TMED2,VCPIP1,SEC23IP,TMED5,HTT,ARFGEF1,LMAN1,MAP2K1,MAP2K2,PRKD1,MAPK3,MAPK1,ATL2,NPLOC4,NSFL1C,TMED9,SURF4,COG2,VRK1,SYNE1,PLEKHM2
GO: Biological Process	GO:0006417	regulation of translation	5.354e-12	95	242	AARS,ABCF1,ACO1,AKT1,EIF2B2,EIF2B5,EIF2B4,EIF2B3,AKT2,AATF,BCL2,NCK2,C1QBP,CALR,LSM14A,EIF3H,EIF3B,EIF4A3,TRMT6,CIRBP,RBM8A,CTNNB1,DDX3X,DDX1,DAPK3,ITM2B,QKI,ELAVL1,EIF4B,EIF4G1,EIF4G2,EIF5,EIF5B,EIF2S1,EIF2B1,PUM1,GCN1L1,PTK2B,FECH,ERBB2,EPRS,ETF1,CHP1,MTOR,FMR1,LSM14B,SYNCRIP,GNB2L1,NDUFA13,RPS27L,EIF1B,MGEA5,IGF2BP3,IGF2BP2,ARFGEF1,PAIP1,EIF3K,IREB2,EIF3E,CAPRIN1,PABPC1,UPF3B,EIF2A,MTPN,MAGOH,…
GO: Biological Process	GO:0046394	carboxylic acid biosynthetic process	7.179e-12	115	314	SUCLA2,ACACA,ACADM,ACADL,ACADVL,KYNU,AGT,EIF2B2,ALDH9A1,ALDH1A1,EIF2B4,PHGDH,ALDH1A2,ALOX15,ALOX5,ANXA1,APOA4,APOC3,APOC2,ASL,ATIC,ALDH7A1,RGN,BHMT,BGN,BCAT2,DEGS1,CCBL1,ALDH4A1,AKR1C3,MTHFD1L,CD74,PTPLAD1,GGCT,RDH10,VCAN,CSPG4,DCN,CYP27A1,CYP7B1,QKI,UPB1,DPYD,EIF2B1,FASN,ACSL3,PTGES2,PADI2,THNSL1,GLS,GCLC,GOT2,GOT1,MECR,APIP,GLUL,AKR1A1,GART,GAMT,GATM,PTGES3,HTT,HAGH,GSS,HSD17B4,MCAT,HPGDS,MAT2B…
GO: Biological Process	GO:0016053	organic acid biosynthetic process	7.179e-12	115	314	SUCLA2,ACACA,ACADM,ACADL,ACADVL,KYNU,AGT,EIF2B2,ALDH9A1,ALDH1A1,EIF2B4,PHGDH,ALDH1A2,ALOX15,ALOX5,ANXA1,APOA4,APOC3,APOC2,ASL,ATIC,ALDH7A1,RGN,BHMT,BGN,BCAT2,DEGS1,CCBL1,ALDH4A1,AKR1C3,MTHFD1L,CD74,PTPLAD1,GGCT,RDH10,VCAN,CSPG4,DCN,CYP27A1,CYP7B1,QKI,UPB1,DPYD,EIF2B1,FASN,ACSL3,PTGES2,PADI2,THNSL1,GLS,GCLC,GOT2,GOT1,MECR,APIP,GLUL,AKR1A1,GART,GAMT,GATM,PTGES3,HTT,HAGH,GSS,HSD17B4,MCAT,HPGDS,MAT2B…
GO: Biological Process	GO:0032956	regulation of actin cytoskeleton organization	8.088e-12	82	199	ADD1,WASL,ARF6,ARHGAP6,NCK2,CAPG,CAPZA1,CAPZA2,CAPZB,KANK2,EVL,LIMA1,CRK,ARPC2,ACTR3,ARPC3,ARPC1B,ARPC4,SORBS3,DAPK3,DLG1,INPP5K,ROCK2,ARHGEF10,PPM1F,PTK2B,FGR,FER,FES,MTOR,CORO1A,TRIOBP,BAIAP2,CDC42EP2,HCK,NCKAP1L,HCLS1,ARFGEF1,GSN,GRB2,ARPC1A,HRG,ARPC5L,SPTBN4,SYNPO,ILK,SMAD3,LRP1,PREX1,MYO1F,MTPN,PAK1,KANK3,ACTR3B,NCK1,NF2,TMOD3,PFN2,PFN1,PDGFRB,PDGFRA,SERPINF2,PLEK,RDX,FHOD1,PYCARD,PHPT1,RASA…
GO: Biological Process	GO:0032989	cellular component morphogenesis	8.293e-12	311	1093	NRP1,NRP2,AK7,ACTC1,ACTG1,CEP41,ADD1,TCTN3,AP2B1,MTMR2,AP2A2,AP2A1,ALCAM,ALDOA,ANK2,ANXA7,ANK3,APOE,LIMD1,WASL,PLOD3,RPS6KA4,ZMYM3,ARL3,DCLK1,ARHGAP4,ARHGDIA,RHOG,RHOB,ARHGEF2,ARHGEF1,PICALM,BCL2,STK24,NCK2,DST,GNPAT,FZD1,C21orf2,FMNL1,C1QBP,CALR,CACNB3,CUL3,CAPZB,OFD1,PNPT1,NUMB,CD9,CDH11,PTPN23,CLIC4,CDC42,SEPT7,CDK1,EVL,C22orf28,CHN1,ARHGEF11,FIG4,CNP,COL1A1,CNTN1,AP2M1,CLU,CLTA,CLTC,CRMP1,ABI…
GO: Biological Process	GO:0030833	regulation of actin filament polymerization	9.522e-12	50	98	ADD1,WASL,ARF6,NCK2,CAPG,CAPZA1,CAPZA2,CAPZB,EVL,ARPC2,ACTR3,ARPC3,ARPC1B,ARPC4,DLG1,PTK2B,FER,MTOR,CORO1A,TRIOBP,CDC42EP2,HCK,NCKAP1L,HCLS1,ARFGEF1,GSN,GRB2,ARPC1A,ARPC5L,SPTBN4,PREX1,MTPN,ACTR3B,NCK1,TMOD3,PFN2,PFN1,RDX,PYCARD,RASA1,TWF1,RAC1,SPTB,SPTBN1,SPTA1,SPTAN1,SPTBN2,SCIN,TPM1,KANK1
GO: Biological Process	GO:0000084	S phase of mitotic cell cycle	1.008e-11	65	144	APEX1,CUL4B,CUL4A,CUL1,GIGYF2,CDK2,CDK4,CDKN1B,PSMD6,CRLF3,PSMD14,PSME3,PSMF1,CDC73,FEN1,MCMBP,ANP32B,MCM4,MCM3,MCM6,MCM5,MCM2,MCM7,MNAT1,ORC4,ORC2,PCNA,POLD1,RFC2,RFC5,RFC4,PSMC5,PSMC4,PSMD1,PSMC6,PSMD3,PSMD2,PSMB8,PSMB9,PSMC2,PSMC1,PSME1,PSME2,PSMD7,PSMD11,PSMD12,PSMB6,PSMB7,PSMB4,PSMB5,PSMB2,PSMB3,PSMA7,PSMB1,PSMA5,PSMA3,PSMA4,PSMA1,SMARCA4,SKP1,ORC3,PAF1,RPS27A,UBE2L3,PSME4
GO: Biological Process	GO:0016050	vesicle organization	1.01e-11	55	113	VPS33B,ABCA1,GBF1,AP1M1,AP2B1,AP1B1,ANXA1,ANXA2,ARCN1,WASL,MTA1,DYSF,PICALM,BCL2,EEA1,STX7,AP3B1,CUL3,CAV1,USO1,ZFYVE16,C2CD5,SEC16A,SEC24D,COPA,COPB1,DAB2,COPB2,SEC24C,CLINT1,TMED10,TMED2,EPS15,SEC24A,VAV3,SEC23A,SAR1B,SEC24B,GNAI3,HIP1,COPE,RAB8A,ARFGAP1,PIK3C2A,SERPINE2,KIF13A,TMED9,SORT1,SEC13,CD2AP,FNBP1L,STXBP1,COPG1,SEC31A,FCHO2
GO: Biological Process	GO:0008064	regulation of actin polymerization or depolymerization	1.015e-11	54	110	ADD1,WASL,ARF6,NCK2,CAPG,CAPZA1,CAPZA2,CAPZB,EVL,LIMA1,ARPC2,ACTR3,ARPC3,ARPC1B,ARPC4,DLG1,PTK2B,FER,MTOR,CORO1A,TRIOBP,CDC42EP2,HCK,NCKAP1L,HCLS1,ARFGEF1,GSN,GRB2,ARPC1A,ARPC5L,SPTBN4,PREX1,MTPN,ACTR3B,NCK1,TMOD3,PFN2,PFN1,PLEK,RDX,PYCARD,RASA1,TWF1,RAC1,SSH1,SSH3,SPTB,SPTBN1,SPTA1,SPTAN1,SPTBN2,SCIN,TPM1,KANK1
GO: Biological Process	GO:0006605	protein targeting	1.059e-11	167	511	ADAR,PARP1,AGT,AKT1,MCM3AP,ANK2,TIMM13,AIP,ANK3,SLC25A6,SAMM50,BID,PIP5K1A,FZD1,AP3B1,SCARB2,SPCS3,AKR1C3,CDH1,CDK1,ZFYVE16,NCKIPSD,G3BP2,NOP58,TOMM70A,MFN2,SUFU,UBR5,MAPK14,NUTF2,NOLC1,DDOST,DAB2,DAG1,IPO4,CYLD,INPP5K,RAB8B,PMPCB,AKAP12,NUP155,EMD,EGFR,YWHAQ,TMED2,OS9,CHP1,MTOR,SEC63,CDC37,TMEM173,FLNA,FAF1,RBPMS,TACC3,IPO11,TOMM40,TIMM44,GNAQ,TRNT1,NDUFA13,FIS1,GFER,MGEA5,MYL12A,TXNIP,HTT,MTX2,…
GO: Biological Process	GO:0009127	purine nucleoside monophosphate biosynthetic process	1.107e-11	20	23	ADA,ADK,ADSL,ADSS,ADSSL1,GMPS,AMPD3,AMPD2,APRT,ATIC,CECR1,GART,PAICS,HPRT1,IMPDH2,IMPDH1,PPAT,PRPS1,PFAS,PRPS2
GO: Biological Process	GO:0009168	purine ribonucleoside monophosphate biosynthetic process	1.107e-11	20	23	ADA,ADK,ADSL,ADSS,ADSSL1,GMPS,AMPD3,AMPD2,APRT,ATIC,CECR1,GART,PAICS,HPRT1,IMPDH2,IMPDH1,PPAT,PRPS1,PFAS,PRPS2
GO: Biological Process	GO:0042180	cellular ketone metabolic process	1.483e-11	87	218	ACADM,ACADL,ACADVL,AGT,AKT1,AKT2,ANXA1,APOA4,APOC3,APOC2,BHMT,SLC25A20,CBR1,CAV1,AKR1C3,PSMD6,ACSL5,CPT1A,CPT2,COMT,CTNNB1,PSMD14,PSME3,DBI,CYP11A1,NQO1,DLD,PSMF1,CAB39,NCOR2,FBP1,ACSL1,ACSL4,MTOR,KDSR,COQ6,HSD17B1,GNMT,CAB39L,OXCT1,COQ9,SMEK2,MAPK9,PRKAG1,PRKAA1,PRKAB2,PRKAB1,PDHB,PDK3,PDK2,SMEK1,PSMC5,PSMC4,PSMD1,PSMC6,PSMD3,PSMD2,PSMB8,PSMB9,PSMC2,PSMC1,PSME1,PSME2,PSMD7,PSMD11,PSMD12,PSMB6,PS…
GO: Biological Process	GO:0030832	regulation of actin filament length	1.591e-11	54	111	ADD1,WASL,ARF6,NCK2,CAPG,CAPZA1,CAPZA2,CAPZB,EVL,LIMA1,ARPC2,ACTR3,ARPC3,ARPC1B,ARPC4,DLG1,PTK2B,FER,MTOR,CORO1A,TRIOBP,CDC42EP2,HCK,NCKAP1L,HCLS1,ARFGEF1,GSN,GRB2,ARPC1A,ARPC5L,SPTBN4,PREX1,MTPN,ACTR3B,NCK1,TMOD3,PFN2,PFN1,PLEK,RDX,PYCARD,RASA1,TWF1,RAC1,SSH1,SSH3,SPTB,SPTBN1,SPTA1,SPTAN1,SPTBN2,SCIN,TPM1,KANK1
GO: Biological Process	GO:0006888	ER to Golgi vesicle-mediated transport	1.613e-11	36	60	ZW10,CUL3,ATL3,SEC16A,SEC24D,TRAPPC4,GOSR1,GOSR2,SEC24C,TMED10,TMED2,SEC24A,SEC23A,SEC23B,SAR1B,SEC24B,HTT,YKT6,TMX1,LMAN2L,LMAN1,TRAPPC3,COG3,SAR1A,NRBP1,GOPC,ERGIC1,ATL2,RAB2A,RAB1A,SEC13,STX18,SEC31A,TRAPPC8,VCP,SCFD1
GO: Biological Process	GO:1901699	cellular response to nitrogen compound	1.677e-11	146	433	ADCY3,PARP1,AKT1,AHSG,AKT2,ATP6V0D1,ATP6V1B1,ATP6V1B2,ATP6V0C,ATP6V0A1,ATP6V1E1,ATP6V1C1,FZD1,PRKRA,LAMTOR3,CDK2,CDH1,CDK1,C2CD5,SRRT,ATP6V1H,COL1A1,TBC1D4,ACSL5,CRK,AKT3,COL5A2,COL6A1,COL4A6,COL4A1,COL3A1,CTNNA1,CTNNB1,ATP6V1D,CSK,CYP11A1,DNMT1,DNMT3A,DIAPH1,INPP5K,CAB39,DPEP1,EIF4B,EIF4G1,FBP1,FER,GNB4,MTOR,TMEM173,GAB1,ADRM1,BAIAP2,GOT1,GNAS,GNB1,GNB2,TCIRG1,GFPT1,SORBS1,GPD1,GRB2,GRB14,HMBS,I…
GO: Biological Process	GO:0006928	cellular component movement	1.959e-11	359	1304	AAMP,ABR,NRP1,NRP2,ACP5,AK7,ACTC1,ACTG1,ACTN1,ACTN4,ACTN2,ADAM10,ADA,AP3D1,AGT,VNN1,AKT1,SGPL1,ARHGEF7,AIF1,AKT2,ANK2,SPAG9,ANXA3,DOK2,ANXA1,APOB,APOE,LIMD1,APEX1,WASL,ARF6,ARRB2,ARL3,DCLK1,ARHGAP5,ARHGAP4,ARHGDIB,ARHGDIA,RHOG,ATP1A1,ATP1A2,SLC16A3,ATP1B1,SUN2,BAX,BCL2,PIP5K1A,MYL6B,STK24,NCK2,DST,FMNL1,C1QBP,C5,CAMK2D,CAPZA1,CAPZA2,IKBKAP,CALD1,CALR,AP3B1,CDC42BPA,CUL3,CAV1,CAPZB,OFD1,PRKD2,CD9,…
GO: Biological Process	GO:0000278	mitotic cell cycle	1.971e-11	242	814	CRADD,CEP41,AKT1,AIF1,CDC16,NAE1,UBA3,APEX1,AATF,BUB3,ARHGEF2,ZW10,ATM,SMC3,TRRAP,SUN2,CLTCL1,BID,NIPBL,USP9X,SMC1A,BCL2,CAMK2D,CAMK2G,CUL4B,CUL4A,CUL3,CUL2,CUL1,GIGYF2,OFD1,SPDYA,NEK7,CDC23,AHCTF1,CDK2,CDK4,CDK6,RUVBL1,SIN3A,CDC42,CDK11B,SEPT7,SH2B1,CDK1,CDK13,KANK2,CDKN1B,CETN2,CKAP5,NEDD1,PSMD6,CLTC,NUP37,CRLF3,AKAP9,ACTR1A,PSMD14,CSNK2A2,PSME3,CSNK1A1,DCTN1,NOLC1,TBRG4,DDX3X,DAPK3,DIS3L2,CYLD…
GO: Biological Process	GO:0000902	cell morphogenesis	1.992e-11	293	1025	NRP1,NRP2,AK7,ACTG1,CEP41,ADD1,TCTN3,AP2B1,AP2A2,AP2A1,ALCAM,ALDOA,ANK2,ANXA7,ANK3,APOE,LIMD1,WASL,PLOD3,RPS6KA4,ZMYM3,ARL3,DCLK1,ARHGAP4,ARHGDIA,RHOG,RHOB,ARHGEF2,ARHGEF1,PICALM,BCL2,STK24,NCK2,DST,FZD1,C21orf2,FMNL1,C1QBP,CALR,CACNB3,CUL3,CAPZB,OFD1,NUMB,CDH11,PTPN23,CLIC4,CDC42,SEPT7,CDK1,EVL,C22orf28,CHN1,ARHGEF11,CNP,COL1A1,CNTN1,AP2M1,CLU,CLTA,CLTC,CRMP1,ABI1,ARPC2,ACTR3,COL5A2,COL6A1,COL6A…
GO: Biological Process	GO:0030258	lipid modification	2.117e-11	73	172	ACAA1,ACADM,ACADS,ACADL,ACADVL,ACOX1,ADH7,MTMR2,AGT,AKT1,ABCD1,AKT2,APOA4,APOA2,APOE,ACOX3,PIP5K1A,SLC25A20,IP6K1,ACSL5,CPT1A,CRAT,CPT2,MAPK14,ECI1,DBI,DECR1,INPP5K,ECH1,CAB39,ACSL1,EPHX2,ETFDH,MTOR,ECI2,ACAA2,BPNT1,GCDH,HADHB,HADH,HADHA,HSD17B4,INPPL1,INPP5B,INPP5A,INPP1,IMPA1,CAB39L,MTM1,MUT,OCRL,PCCB,PCCA,POR,PRKAG1,PRKAA1,PRKAB2,PRKAB1,PIK3C2A,PIK3CA,PIK3C3,PIK3R1,AGK,CYP4V2,ABCD3,PEX5,SOAT1,…
GO: Biological Process	GO:0043648	dicarboxylic acid metabolic process	2.27e-11	47	91	SUCLG1,SUCLA2,KYNU,ADSS,ASL,ATIC,ALDH4A1,MTHFD1L,CS,CYP11A1,CYP17A1,DLD,DLST,FH,ME3,ALDH1L1,GLS,GCLC,GOT2,GOT1,GLUL,HTT,IDH3G,IDH3B,IDH3A,IDH2,IDH1,MTHFD1,MTHFR,ME2,MDH1,MDH2,OGDH,PCK2,PC,ACSF3,ALDH18A1,CCBL2,SLC1A3,SHMT1,SDHA,D2HGDH,STAT5A,QPRT,HAAO,ADHFE1,ALDH5A1
GO: Biological Process	GO:0051656	establishment of organelle localization	2.279e-11	57	121	SNAP23,GBF1,ARCN1,ARHGEF2,ZW10,SUN2,CDC42BPA,CUL3,CDC23,CDC42,SEC16A,SEC24D,COPA,COPB1,LRPPRC,RAB11B,COPB2,SEC24C,RHOT2,TMED10,TMED2,SEC24A,SEC23A,SAR1B,SEC24B,NUDC,HTT,YKT6,COPE,MAP1B,MAP4,MAPT,MLH1,NUMA1,MYH9,MYO5A,SEPT5,MAP2K1,ARFGAP1,SEH1L,PTK2,RAB27A,PVRL2,TMED9,SEC13,RPS15,RHOT1,BBS7,MAP1S,COPG1,SEC31A,CLASP1,SYNE1,CHAMP1,SCRIB,KIF1B,RRS1
GO: Biological Process	GO:0010243	response to organic nitrogen	2.458e-11	215	706	SERPINA3,AARS,ADA,ADCY3,KYNU,PARP1,AK4,AKT1,AHSG,EIF2B2,EIF2B5,EIF2B4,EIF2B3,AKT2,ALDOC,GGH,ANXA1,APOC3,ASPH,ATP1A2,ATP6V0D1,ATP2A2,BAG1,ATP6V1B1,ATP6V1B2,ATP6V0C,ATP6V0A1,ATP6V1E1,ATP6V1C1,BDH1,BCKDHB,BCL2,FZD1,CASP1,LAMTOR3,PEA15,CDK2,SIN3A,CDH1,CDA,CDK1,C2CD5,ATP6V1H,COL1A1,TBC1D4,ACSL5,CRK,AKT3,COL5A2,COL6A1,COL4A6,COL4A1,COL3A1,CTNNA1,CTNNB1,ATP6V1D,CTSB,MAPK14,CSK,DAG1,CYP11A1,CYP17A1,CYC1,…
GO: Biological Process	GO:0052548	regulation of endopeptidase activity	2.489e-11	103	276	SERPINA3,RIPK1,FAM162A,TRADD,AGT,AKT1,AKT2,APAF1,ARRB1,SERPINC1,AIFM1,USP14,PRDX5,BAK1,BAX,FOXL2,RECK,SERPING1,C6,C9,CAST,SERPINA6,SERPINH1,CASP1,CASP7,CASP8,CDH1,CD44,CDKN1B,PDCD6,DNAJB6,CSTB,UCHL5,CRYAB,PSMD14,PSME3,DDX3X,PSMF1,DPEP1,SERPINB1,PPM1F,PRDX3,ADRM1,SERPINA10,GNB2L1,RPS27L,FIS1,SERPIND1,HTT,GPX1,GPI,HRG,HIP1,HTRA2,IGBP1,IFI16,KNG1,JAK2,ITIH3,ITIH2,ITIH4,SMAD3,BIRC6,MEN1,MAP3K5,MGMT,L…
GO: Biological Process	GO:0033124	regulation of GTP catabolic process	2.643e-11	99	262	ARFGAP3,IQGAP1,ARHGEF7,ALDH1A1,AKT2,BIN1,ARRB1,ARRB2,ARHGAP6,ARHGAP5,ARHGAP4,ARHGAP1,RHOG,RAB3GAP2,PIP5K1A,TBC1D10B,PKP4,RIC8A,TBC1D5,DOCK4,PTPLAD1,CHN1,ACAP1,GIT2,TBC1D4,CRK,SNX9,LRRK2,TBC1D17,ARHGEF6,DOCK1,ARHGEF10,PTK2B,TMED2,ERBB2,EPHB3,MTOR,FGD3,ADAP1,VAV3,CDC42EP2,GNB2L1,GNAQ,NCKAP1L,AGRN,ARFGEF1,ASAP1,ARHGAP35,AGFG1,PREX1,LLGL1,SNX18,SMAP2,RALGAPA2,MYO9B,TBC1D15,RALGAPB,NF1,TBC1D2,MAP2K1,P…
GO: Biological Process	GO:0044711	single-organism biosynthetic process	2.665e-11	161	493	SUCLA2,ACACA,ACADM,ACADL,ACAT1,ACADVL,KYNU,AGT,EIF2B2,ALDH9A1,ALDH1A1,EIF2B4,PHGDH,ALDH1A2,ALOX15,ALOX5,ANXA1,APOB,APOA4,APOA2,APOE,APOC3,APOC2,ASL,ATIC,ALDH7A1,RGN,BDH1,BHMT,BGN,BCAT2,DEGS1,CCBL1,ALDH4A1,AKR1C3,MTHFD1L,CD74,ISYNA1,PTPLAD1,IP6K1,CYB5R1,GGCT,RDH10,VCAN,CSPG4,DCN,CYP11A1,CYP27A1,CYP7B1,CYB5R3,QKI,GGPS1,PCYT1B,UPB1,SPTLC2,DPYD,EIF2B1,FASN,PTK2B,ACSL3,FDPS,FABP5,PTGES2,PADI2,G6PD,LPC…
GO: Biological Process	GO:0032970	regulation of actin filament-based process	2.696e-11	89	227	ADD1,ANK2,WASL,ARF6,ARHGAP6,ATP1A1,ATP1A2,NCK2,CAPG,CAPZA1,CAPZA2,CAPZB,KANK2,EVL,LIMA1,CRK,ARPC2,ACTR3,ARPC3,ARPC1B,ARPC4,SORBS3,DAPK3,DLG1,INPP5K,ROCK2,DSP,DSG2,NUP155,ARHGEF10,PPM1F,PTK2B,FGR,FER,FES,MTOR,CORO1A,TRIOBP,BAIAP2,CDC42EP2,HCK,NCKAP1L,HCLS1,ARFGEF1,GSN,GRB2,ARPC1A,HRG,ARPC5L,SPTBN4,JUP,SYNPO,ILK,SMAD3,LRP1,PREX1,MYO1F,MTPN,PAK1,KANK3,ACTR3B,NCK1,NF2,TMOD3,PFN2,PFN1,PDGFRB,PDGFRA,SE…
GO: Biological Process	GO:0000216	M/G1 transition of mitotic cell cycle	2.887e-11	43	80	CDK2,PSMD6,PSMD14,PSME3,PSMF1,MCM4,MCM3,MCM6,MCM5,MCM2,MCM7,ORC4,ORC2,PSMC5,PSMC4,PSMD1,PSMC6,PSMD3,PSMD2,PSMB8,PSMB9,PSMC2,PSMC1,PSME1,PSME2,PSMD7,PSMD11,PSMD12,PSMB6,PSMB7,PSMB4,PSMB5,PSMB2,PSMB3,PSMA7,PSMB1,PSMA5,PSMA3,PSMA4,PSMA1,ORC3,RPS27A,PSME4
GO: Biological Process	GO:0051437	positive regulation of ubiquitin-protein ligase activity involved in mitotic cell cycle	3.575e-11	40	72	CDC16,CUL1,CDC23,CDK1,PSMD6,PSMD14,PSME3,PSMF1,ANAPC1,ANAPC4,PSMC5,PSMC4,PSMD1,PSMC6,PSMD3,PSMD2,PSMB8,PSMB9,PSMC2,PSMC1,PSME1,PSME2,PSMD7,PSMD11,PSMD12,PSMB6,PSMB7,PSMB4,PSMB5,PSMB2,PSMB3,PSMA7,PSMB1,PSMA5,PSMA3,PSMA4,PSMA1,SKP1,RPS27A,PSME4
GO: Biological Process	GO:0019220	regulation of phosphate metabolic process	3.6e-11	370	1357	ARFGAP3,ABCA1,IQGAP1,NRP1,ACADVL,RIPK1,ADAR,ADCY3,ADD1,ADRBK2,AGT,AKT1,SQSTM1,ARHGEF7,AHSG,AIF1,ALDH1A1,AKT2,BIN1,SPAG9,APOE,APOC2,ARAF,RPS6KA4,ARRB1,ARRB2,ARHGAP6,ARHGAP5,ARHGAP4,ARHGAP1,RHOG,ATP6V0D1,RGN,RAB3GAP2,BAK1,BAX,BCL2,PIP5K1A,NCK2,FZD1,C5,TBC1D10B,CALR,PKP4,CAV1,SPDYA,LAMTOR3,PRKD2,RIC8A,CDC42,CDA,CDK1,CD81,CD74,CD44,CHI3L1,TBC1D5,DOCK4,PTPLAD1,CHN1,ACAP1,CDKN1B,CUL7,GIT2,CCR1,CNN3,TBC…
GO: Biological Process	GO:0051439	regulation of ubiquitin-protein ligase activity involved in mitotic cell cycle	4.534e-11	42	78	CDC16,BUB3,CUL1,CDC23,CDK2,CDK1,PSMD6,PSMD14,PSME3,PSMF1,ANAPC1,ANAPC4,PSMC5,PSMC4,PSMD1,PSMC6,PSMD3,PSMD2,PSMB8,PSMB9,PSMC2,PSMC1,PSME1,PSME2,PSMD7,PSMD11,PSMD12,PSMB6,PSMB7,PSMB4,PSMB5,PSMB2,PSMB3,PSMA7,PSMB1,PSMA5,PSMA3,PSMA4,PSMA1,SKP1,RPS27A,PSME4
GO: Biological Process	GO:0006521	regulation of cellular amino acid metabolic process	4.858e-11	35	59	BHMT,PSMD6,COMT,PSMD14,PSME3,NQO1,PSMF1,PSMC5,PSMC4,PSMD1,PSMC6,PSMD3,PSMD2,PSMB8,PSMB9,PSMC2,PSMC1,PSME1,PSME2,PSMD7,PSMD11,PSMD12,PSMB6,PSMB7,PSMB4,PSMB5,PSMB2,PSMB3,PSMA7,PSMB1,PSMA5,PSMA3,PSMA4,PSMA1,PSME4
GO: Biological Process	GO:0022405	hair cycle process	4.886e-11	100	268	AARS,TRADD,AP3D1,AP1M1,AP1S2,AP2B1,AP1B1,AP2A2,AP2A1,AP1G1,AKT1,BCL2,CANX,CALR,AP3B1,CDC42,CD74,PSMD6,SEC24D,AP2M1,CLTA,CLTC,CTNNB1,CTSS,CTSD,ACTR1A,ACTR1B,CTSL1,PSMD14,PSME3,DCTN1,DBI,CYBB,DYNC1H1,DYNC1LI2,DYNC1I2,KIF3B,DNM2,PSMF1,SEC24C,EGFR,SEC24A,KIF3A,DCTN4,SEC23A,SAR1B,SEC24B,HDAC2,NSDHL,PDIA3,DCTN2,HLA-DRA,HLA-DPA1,RBPJ,KLC1,KIF2A,KIF5A,ITGB5,ITGAV,SMAD4,LNPEP,MYO5A,SEC61A1,NCF2,RELA,PSMC5…
GO: Biological Process	GO:0001942	hair follicle development	4.886e-11	100	268	AARS,TRADD,AP3D1,AP1M1,AP1S2,AP2B1,AP1B1,AP2A2,AP2A1,AP1G1,AKT1,BCL2,CANX,CALR,AP3B1,CDC42,CD74,PSMD6,SEC24D,AP2M1,CLTA,CLTC,CTNNB1,CTSS,CTSD,ACTR1A,ACTR1B,CTSL1,PSMD14,PSME3,DCTN1,DBI,CYBB,DYNC1H1,DYNC1LI2,DYNC1I2,KIF3B,DNM2,PSMF1,SEC24C,EGFR,SEC24A,KIF3A,DCTN4,SEC23A,SAR1B,SEC24B,HDAC2,NSDHL,PDIA3,DCTN2,HLA-DRA,HLA-DPA1,RBPJ,KLC1,KIF2A,KIF5A,ITGB5,ITGAV,SMAD4,LNPEP,MYO5A,SEC61A1,NCF2,RELA,PSMC5…
GO: Biological Process	GO:0022404	molting cycle process	4.886e-11	100	268	AARS,TRADD,AP3D1,AP1M1,AP1S2,AP2B1,AP1B1,AP2A2,AP2A1,AP1G1,AKT1,BCL2,CANX,CALR,AP3B1,CDC42,CD74,PSMD6,SEC24D,AP2M1,CLTA,CLTC,CTNNB1,CTSS,CTSD,ACTR1A,ACTR1B,CTSL1,PSMD14,PSME3,DCTN1,DBI,CYBB,DYNC1H1,DYNC1LI2,DYNC1I2,KIF3B,DNM2,PSMF1,SEC24C,EGFR,SEC24A,KIF3A,DCTN4,SEC23A,SAR1B,SEC24B,HDAC2,NSDHL,PDIA3,DCTN2,HLA-DRA,HLA-DPA1,RBPJ,KLC1,KIF2A,KIF5A,ITGB5,ITGAV,SMAD4,LNPEP,MYO5A,SEC61A1,NCF2,RELA,PSMC5…
GO: Biological Process	GO:0046034	ATP metabolic process	5.056e-11	74	178	ACTC1,ABCC3,AK4,AK2,AK1,ABCD1,ALDOA,ASNA1,ATP1A3,ATP1A1,ATP1A2,ATP5C1,ATP6V0D1,ATP5A1,ATP2B4,ATP2A3,ATP2A2,ATP2B1,ATP1B1,ATP6V1B1,ATP6V1B2,ATP6V0C,ATP5J,ATP6V1C1,SMARCA5,ENTPD1,ATP6V1H,PSMD6,SLC25A13,DDX5,DDX3X,LONP1,MYH14,VPS4B,CHD1L,ASCC3,RUVBL2,CLPX,SMARCAL1,ABCA8,GBAS,GUK1,MSH6,ATP5L,AK3,IPO8,HSPA8,HSPA5,IDE,RNF213,MSH2,MLH1,WRNIP1,NSF,MYH9,ATP8B2,MYO9B,NDUFS1,OLA1,PPP2R4,PSMC5,PSMC4,PSMC6,PS…
GO: Biological Process	GO:0009611	response to wounding	5.062e-11	325	1168	A2M,SERPINA3,ABCF1,ABR,NRP1,ACP5,AK7,ACTG1,ACTN1,ACTN4,PABPC4,ACTN2,ADA,AGT,VNN1,AKT1,AHSG,AIF1,ALB,ALDOA,PROZ,ALOX15,ALOX5,PAPSS2,ANXA5,DOK2,AOX1,MYOF,ANXA1,ANXA2,APOB,APOA2,APOE,APCS,RPS6KA4,ARRB1,ARRB2,RHOG,RHOB,SERPINC1,SLC16A3,ATP2B4,ATP2A3,ATP2A2,ATP2B1,ATP1B1,DYSF,PRDX5,BAX,TXN2,BCL2,BTK,STK24,DST,C2,C1QBP,SERPING1,C6,C9,C4BPA,C5,CAPZA1,CAPZA2,CALU,CALM3,CASK,AP3B1,ATRN,CAV1,CAPZB,ENTPD1,E…
GO: Biological Process	GO:0009123	nucleoside monophosphate metabolic process	5.61e-11	33	54	ADA,ADK,ADSL,ADSS,ADSSL1,AK4,AK2,AK1,GMPS,AMPD3,AMPD2,APRT,ATIC,GMPR2,DUT,CECR1,DPYD,GART,GUK1,DNPH1,AK3,PAICS,HPRT1,IMPDH2,IMPDH1,NT5E,PPAT,PRPS1,PFAS,PRPS2,NT5C2,UPP1,UMPS
GO: Biological Process	GO:0043087	regulation of GTPase activity	5.812e-11	97	258	ARFGAP3,IQGAP1,ARHGEF7,ALDH1A1,AKT2,BIN1,ARRB1,ARRB2,ARHGAP6,ARHGAP5,ARHGAP4,ARHGAP1,RHOG,RAB3GAP2,PIP5K1A,TBC1D10B,PKP4,RIC8A,TBC1D5,DOCK4,PTPLAD1,CHN1,ACAP1,GIT2,TBC1D4,CRK,SNX9,LRRK2,TBC1D17,ARHGEF6,DOCK1,PTK2B,TMED2,ERBB2,EPHB3,MTOR,FGD3,ADAP1,VAV3,CDC42EP2,GNB2L1,GNAQ,NCKAP1L,AGRN,ARFGEF1,ASAP1,ARHGAP35,AGFG1,PREX1,LLGL1,SNX18,SMAP2,RALGAPA2,MYO9B,TBC1D15,RALGAPB,NF1,TBC1D2,MAP2K1,PRKG1,ARHG…
GO: Biological Process	GO:0051259	protein oligomerization	6.398e-11	136	402	ACACA,ACADM,ACADS,ACADL,ACAT1,RIPK1,ACTN2,TRADD,ADSL,MTMR2,SQSTM1,ALDH1A1,ALAD,ALDOC,ALDOA,SPAG9,ANXA5,APAF1,BID,BAX,KCNAB2,CAV1,CASP8,CAT,PNPT1,ATL3,CDH1,SEPT7,CDA,EVL,CUTA,COL1A1,CLU,CPT1A,RAD50,COL6A1,COL6A2,DNM1L,CTNNA1,CTNNB1,TRIM28,CRYZ,CRYAB,SNX9,LONP1,DECR1,CPSF7,TOR1A,CAB39,DPYSL3,STOM,FBP1,TMED10,EHD1,APOA1BP,SCUBE1,MALT1,SEPT9,CHP1,CPSF6,NUDT21,GLS,CRBN,DCXR,GNB2L1,SH3GLB1,GLUL,ATL1,FI…
GO: Biological Process	GO:0022411	cellular component disassembly	6.547e-11	111	309	NAPA,ADD1,APAF1,BAZ1B,ARHGEF2,AIFM1,ARID1A,BAX,STK24,FOXL2,CAPG,CAPZA1,CAPZA2,CAPZB,CASP7,CASP8,CDH1,EVL,LIMA1,NEDD1,CFL2,HDAC6,DNM1L,CTNNB1,TJP2,DSP,DSG2,DPP4,ENDOG,TRPV4,ETF1,SUPT16H,TRIOBP,NDUFA13,MGEA5,GSN,HMGB2,HTRA2,KLC1,KPNA1,KPNB1,KLKB1,KIF5B,SPTBN4,LMNB1,LMNA,LAMC1,STMN1,MAP1B,MAP1A,MAPT,MTPN,MMP14,MMP9,MMP2,PAK2,MICAL1,RPL10A,TMOD3,PPT1,PEX14,ARID2,PLEK,PLG,PLEC,UPF1,RDX,ROCK1,RPL10,RPL…
GO: Biological Process	GO:0009308	amine metabolic process	7.014e-11	88	227	KYNU,EIF2B2,EIF2B4,PHGDH,APOA4,APOA2,ALDH7A1,BHMT,KMO,CCBL1,PLA2G4C,AOC3,CETP,PSMD6,COMT,PSMD14,PSME3,NQO1,PCYT1B,PSMF1,SPTLC2,EIF2B1,ACSL3,PNPLA6,FABP5,PLBD1,LPCAT1,GOT1,APIP,GCDH,GNMT,HPRT1,ENPP6,SLC27A1,SAT2,MTHFD1,MTHFR,MTAP,MSRA,MTR,MAOB,MECP2,PEBP1,SLC44A2,PON1,ENPP2,SMPD4,PCYT1A,PAOX,PSMC5,PSMC4,PSMD1,PSMC6,PSMD3,PSMD2,PSMB8,PSMB9,PSMC2,PSMC1,PSME1,PSME2,PSMD7,PSMD11,PSMD12,PSMB6,PSMB7,PSM…
GO: Biological Process	GO:0072524	pyridine-containing compound metabolic process	7.398e-11	37	65	KYNU,PGLS,PRDX5,PDXK,KMO,DLST,H6PD,FDXR,G6PD,HIBADH,DCXR,HTT,GPD2,GPD1,IDH3G,IDH3B,IDH3A,IDH1,NADKD1,LDHA,NUDT12,MTAP,MDH1,MDH2,OGDH,NCF2,PGD,PGAM1,TKT,TALDO1,PNPO,GLYR1,TXNRD1,QPRT,HAAO,GPD1L,NAPRT1
GO: Biological Process	GO:0051320	S phase	7.442e-11	67	156	APEX1,CUL4B,CUL4A,CUL1,GIGYF2,CDK2,CDK4,CDKN1B,PSMD6,CREBBP,CRLF3,PSMD14,PSME3,PSMF1,CDC73,FEN1,MCMBP,ANP32B,MCM4,MCM3,MCM6,MCM5,MCM2,MCM7,MNAT1,ORC4,ORC2,PCNA,POLD1,RFC2,RFC5,RFC4,PSMC5,PSMC4,PSMD1,PSMC6,PSMD3,PSMD2,PSMB8,PSMB9,PSMC2,PSMC1,PSME1,PSME2,PSMD7,PSMD11,PSMD12,PSMB6,PSMB7,PSMB4,PSMB5,PSMB2,PSMB3,PSMA7,PSMB1,PSMA5,PSMA3,PSMA4,PSMA1,PTPRC,SMARCA4,SKP1,ORC3,PAF1,RPS27A,UBE2L3,PSME4
GO: Biological Process	GO:0072474	signal transduction involved in mitotic cell cycle G1/S checkpoint	8.705e-11	38	68	CRADD,ATM,CDK2,CDKN1B,PSMD6,PSMD14,PSME3,PSMF1,PML,PSMC5,PSMC4,PSMD1,PSMC6,PSMD3,PSMD2,PSMB8,PSMB9,PSMC2,PSMC1,PSME1,PSME2,PSMD7,PSMD11,PSMD12,PSMB6,PSMB7,PSMB4,PSMB5,PSMB2,PSMB3,PSMA7,PSMB1,PSMA5,PSMA3,PSMA4,PSMA1,RPS27A,PSME4
GO: Biological Process	GO:0006977	DNA damage response, signal transduction by p53 class mediator resulting in cell cycle arrest	8.705e-11	38	68	CRADD,ATM,CDK2,CDKN1B,PSMD6,PSMD14,PSME3,PSMF1,PML,PSMC5,PSMC4,PSMD1,PSMC6,PSMD3,PSMD2,PSMB8,PSMB9,PSMC2,PSMC1,PSME1,PSME2,PSMD7,PSMD11,PSMD12,PSMB6,PSMB7,PSMB4,PSMB5,PSMB2,PSMB3,PSMA7,PSMB1,PSMA5,PSMA3,PSMA4,PSMA1,RPS27A,PSME4
GO: Biological Process	GO:0072413	signal transduction involved in mitotic cell cycle checkpoint	8.705e-11	38	68	CRADD,ATM,CDK2,CDKN1B,PSMD6,PSMD14,PSME3,PSMF1,PML,PSMC5,PSMC4,PSMD1,PSMC6,PSMD3,PSMD2,PSMB8,PSMB9,PSMC2,PSMC1,PSME1,PSME2,PSMD7,PSMD11,PSMD12,PSMB6,PSMB7,PSMB4,PSMB5,PSMB2,PSMB3,PSMA7,PSMB1,PSMA5,PSMA3,PSMA4,PSMA1,RPS27A,PSME4
GO: Biological Process	GO:0072431	signal transduction involved in mitotic G1 DNA damage checkpoint	8.705e-11	38	68	CRADD,ATM,CDK2,CDKN1B,PSMD6,PSMD14,PSME3,PSMF1,PML,PSMC5,PSMC4,PSMD1,PSMC6,PSMD3,PSMD2,PSMB8,PSMB9,PSMC2,PSMC1,PSME1,PSME2,PSMD7,PSMD11,PSMD12,PSMB6,PSMB7,PSMB4,PSMB5,PSMB2,PSMB3,PSMA7,PSMB1,PSMA5,PSMA3,PSMA4,PSMA1,RPS27A,PSME4
GO: Biological Process	GO:0009063	cellular amino acid catabolic process	8.852e-11	54	115	HIBCH,ACAT1,ACADSB,KYNU,GGACT,ASL,ALDH7A1,BCAT2,BCKDHB,KMO,CCBL1,ALDH4A1,CSAD,PCYOX1L,PCYOX1,DBT,DLD,DLST,SARDH,FAH,ALDH1L1,ASRGL1,HIBADH,GLS,GOT2,GOT1,GLUL,BCKDK,GCDH,GSTZ1,HSD17B10,HMGCL,IVD,DTD2,ACAD8,ALDH6A1,MCCC1,OGDH,PCBD1,MCCC2,PPAT,ENOSF1,QDPR,CCBL2,SHMT1,DDAH1,DDAH2,THNSL2,SUOX,PDPR,TST,ETHE1,HAAO,ALDH5A1
GO: Biological Process	GO:0031175	neuron projection development	9.859e-11	231	781	NRP1,NRP2,ACTG1,AP2B1,AP2A2,AP2A1,AKT1,ALCAM,PHGDH,ANK2,ANK3,APOE,WASL,ARF6,RPS6KA4,DCLK1,ARHGAP4,ARHGDIA,RHOG,RHOB,ARHGEF1,PICALM,ATXN10,BCL2,STK24,NCK2,DST,FZD1,CACNB3,NUMB,CDH11,CDH1,CDC42,CDK1,CD44,EVL,CHN1,ARHGEF11,FIG4,CNP,COL1A1,CNTN1,AP2M1,CLU,CLTA,CLTC,CRMP1,ACTR3,COL5A2,COL6A1,COL6A2,COL6A3,COL4A1,COL3A1,COL4A2,CTNNA1,CTNNA2,PLXNC1,ABI2,FLOT1,TRPV2,TRAPPC4,CSNK2A2,CSNK2B,VCAN,CSPG4,LRRK…
GO: Biological Process	GO:0042633	hair cycle	1.12e-10	101	275	AARS,TRADD,AP3D1,AP1M1,AP1S2,AP2B1,AP1B1,AP2A2,AP2A1,AP1G1,AKT1,NIPBL,BCL2,CANX,CALR,AP3B1,CDC42,CD74,PSMD6,SEC24D,AP2M1,CLTA,CLTC,CTNNB1,CTSS,CTSD,ACTR1A,ACTR1B,CTSL1,PSMD14,PSME3,DCTN1,DBI,CYBB,DYNC1H1,DYNC1LI2,DYNC1I2,KIF3B,DNM2,PSMF1,SEC24C,EGFR,SEC24A,KIF3A,DCTN4,SEC23A,SAR1B,SEC24B,HDAC2,NSDHL,PDIA3,DCTN2,HLA-DRA,HLA-DPA1,RBPJ,KLC1,KIF2A,KIF5A,ITGB5,ITGAV,SMAD4,LNPEP,MYO5A,SEC61A1,NCF2,RELA…
GO: Biological Process	GO:0042303	molting cycle	1.12e-10	101	275	AARS,TRADD,AP3D1,AP1M1,AP1S2,AP2B1,AP1B1,AP2A2,AP2A1,AP1G1,AKT1,NIPBL,BCL2,CANX,CALR,AP3B1,CDC42,CD74,PSMD6,SEC24D,AP2M1,CLTA,CLTC,CTNNB1,CTSS,CTSD,ACTR1A,ACTR1B,CTSL1,PSMD14,PSME3,DCTN1,DBI,CYBB,DYNC1H1,DYNC1LI2,DYNC1I2,KIF3B,DNM2,PSMF1,SEC24C,EGFR,SEC24A,KIF3A,DCTN4,SEC23A,SAR1B,SEC24B,HDAC2,NSDHL,PDIA3,DCTN2,HLA-DRA,HLA-DPA1,RBPJ,KLC1,KIF2A,KIF5A,ITGB5,ITGAV,SMAD4,LNPEP,MYO5A,SEC61A1,NCF2,RELA…
GO: Biological Process	GO:0009719	response to endogenous stimulus	1.213e-10	343	1253	SERPINA3,AARS,ABCA1,ACAA1,ACADM,ACADS,ACAT1,ADA,ADCY3,KYNU,PARP1,ADRBK1,AGL,AK4,AKT1,AHSG,AIF1,EIF2B2,EIF2B5,EIF2B4,EIF2B3,AKT2,ALDOC,GGH,ALPL,ALDH1A2,ASH2L,ANXA3,APAF1,ANXA1,APOB,APOA2,APOC3,PLOD3,ARSA,ARSB,ARRB2,ASPH,FIBP,ATP1A2,ATP6V0D1,ATP2A2,BAG1,ATP6V1B1,ATP6V1B2,ATP6V0C,ATP6V0A1,ATP6V1E1,ATP6V1C1,BDH1,BID,TXN2,USP9X,BCKDHB,BCL2,FZD1,CA4,CA2,CALM3,CALR,CBL,CAV1,CASP1,CASP8,LAMTOR3,PRKD2,AKR…
GO: Biological Process	GO:0042590	antigen processing and presentation of exogenous peptide antigen via MHC class I	1.323e-10	42	80	CALR,PSMD6,CTSS,PSMD14,PSME3,CYBB,PSMF1,PDIA3,ITGB5,ITGAV,LNPEP,SEC61A1,NCF2,PSMC5,PSMC4,PSMD1,PSMC6,PSMD3,PSMD2,PSMB8,PSMB9,PSMC2,PSMC1,PSME1,PSME2,PSMD7,PSMD11,PSMD12,PSMB6,PSMB7,PSMB4,PSMB5,PSMB2,PSMB3,PSMA7,PSMB1,PSMA5,PSMA3,PSMA4,PSMA1,RPS27A,PSME4
GO: Biological Process	GO:0071417	cellular response to organic nitrogen	1.329e-10	135	402	ADCY3,PARP1,AKT1,AHSG,AKT2,ATP6V0D1,ATP6V1B1,ATP6V1B2,ATP6V0C,ATP6V0A1,ATP6V1E1,ATP6V1C1,FZD1,LAMTOR3,CDK2,CDH1,CDK1,C2CD5,ATP6V1H,COL1A1,TBC1D4,ACSL5,CRK,AKT3,COL5A2,COL6A1,COL4A6,COL4A1,COL3A1,CTNNA1,CTNNB1,ATP6V1D,CSK,CYP11A1,DNMT1,DNMT3A,INPP5K,CAB39,EIF4B,EIF4G1,FBP1,FER,GNB4,MTOR,GAB1,ADRM1,BAIAP2,GOT1,GNAS,GNB1,GNB2,TCIRG1,GFPT1,SORBS1,GPD1,GRB2,GRB14,HMBS,IDE,ICAM1,JUP,JAK2,ITPR2,INPPL1,L…
GO: Biological Process	GO:0006399	tRNA metabolic process	1.355e-10	60	135	AARS,YARS,ELAC2,CARS,PARS2,C22orf28,TRMT6,FARSB,DARS,AIMP1,QTRTD1,NARS2,CARS2,FARSA,PUS1,POP1,EPRS,TARS2,FBL,POLG2,TRNT1,GARS,YARS2,WARS2,FARS2,HARS,HSD17B10,RPP30,IARS,KARS,URM1,TRMT1L,AARS2,PPA2,MARS,METTL1,RARS2,NARS,PPA1,TRMT1,OSGEP,IARS2,RARS,QARS,SARS,TRMT10C,THG1L,NSUN2,CDKAL1,QRSL1,TARS,EARS2,DARS2,SSB,TARSL2,WARS,VARS,LARS2,HARS2,AIMP2
GO: Biological Process	GO:0072401	signal transduction involved in DNA integrity checkpoint	1.562e-10	38	69	CRADD,ATM,CDK2,CDKN1B,PSMD6,PSMD14,PSME3,PSMF1,PML,PSMC5,PSMC4,PSMD1,PSMC6,PSMD3,PSMD2,PSMB8,PSMB9,PSMC2,PSMC1,PSME1,PSME2,PSMD7,PSMD11,PSMD12,PSMB6,PSMB7,PSMB4,PSMB5,PSMB2,PSMB3,PSMA7,PSMB1,PSMA5,PSMA3,PSMA4,PSMA1,RPS27A,PSME4
GO: Biological Process	GO:0072422	signal transduction involved in DNA damage checkpoint	1.562e-10	38	69	CRADD,ATM,CDK2,CDKN1B,PSMD6,PSMD14,PSME3,PSMF1,PML,PSMC5,PSMC4,PSMD1,PSMC6,PSMD3,PSMD2,PSMB8,PSMB9,PSMC2,PSMC1,PSME1,PSME2,PSMD7,PSMD11,PSMD12,PSMB6,PSMB7,PSMB4,PSMB5,PSMB2,PSMB3,PSMA7,PSMB1,PSMA5,PSMA3,PSMA4,PSMA1,RPS27A,PSME4
GO: Biological Process	GO:0072404	signal transduction involved in G1/S transition checkpoint	1.562e-10	38	69	CRADD,ATM,CDK2,CDKN1B,PSMD6,PSMD14,PSME3,PSMF1,PML,PSMC5,PSMC4,PSMD1,PSMC6,PSMD3,PSMD2,PSMB8,PSMB9,PSMC2,PSMC1,PSME1,PSME2,PSMD7,PSMD11,PSMD12,PSMB6,PSMB7,PSMB4,PSMB5,PSMB2,PSMB3,PSMA7,PSMB1,PSMA5,PSMA3,PSMA4,PSMA1,RPS27A,PSME4
GO: Biological Process	GO:0019395	fatty acid oxidation	1.562e-10	47	95	ACAA1,ACADM,ACADS,ACADL,ACADVL,ACOX1,ADH7,AKT1,ABCD1,AKT2,ACOX3,SLC25A20,ACSL5,CPT1A,CRAT,CPT2,MAPK14,ECI1,DBI,DECR1,ECH1,CAB39,ACSL1,ETFDH,MTOR,ECI2,ACAA2,GCDH,HADHB,HADH,HADHA,HSD17B4,CAB39L,MUT,PCCB,PCCA,POR,PRKAG1,PRKAA1,PRKAB2,PRKAB1,CYP4V2,ABCD3,PEX5,AMACR,SCP2,MLYCD
GO: Biological Process	GO:0031396	regulation of protein ubiquitination	1.854e-10	76	189	FBXO4,CDC16,ARRB1,ARRB2,BUB3,CUL1,CAV1,CDC23,CDK2,CDK1,PSMD6,CLU,SUFU,UBR5,PSMD14,PSME3,LRRK2,TRIP12,PSMF1,ATG5,BAG5,PTK2B,MALT1,CHP1,GCLC,VPS28,STUB1,ATG7,HSPA5,ANAPC1,UBQLN1,ANAPC4,MAPK9,NXN,PML,PIN1,PSMC5,PSMC4,PSMD1,PSMC6,PSMD3,PSMD2,PSMB8,PSMB9,PSMC2,PSMC1,PSME1,PSME2,PSMD7,PSMD11,PSMD12,PTK2,NDNL2,PSMB6,PSMB7,PSMB4,PSMB5,PSMB2,PSMB3,PSMA7,PSMB1,PSMA5,PSMA3,PSMA4,PSMA1,SKP1,HSPBP1,GTPBP4,RPS…
GO: Biological Process	GO:0002479	antigen processing and presentation of exogenous peptide antigen via MHC class I, TAP-dependent	1.93e-10	40	75	CALR,PSMD6,PSMD14,PSME3,CYBB,PSMF1,PDIA3,ITGB5,ITGAV,SEC61A1,NCF2,PSMC5,PSMC4,PSMD1,PSMC6,PSMD3,PSMD2,PSMB8,PSMB9,PSMC2,PSMC1,PSME1,PSME2,PSMD7,PSMD11,PSMD12,PSMB6,PSMB7,PSMB4,PSMB5,PSMB2,PSMB3,PSMA7,PSMB1,PSMA5,PSMA3,PSMA4,PSMA1,RPS27A,PSME4
GO: Biological Process	GO:0009109	coenzyme catabolic process	2.196e-10	25	36	SUCLG1,SUCLA2,ACO2,ACO1,CBR1,CS,DLD,DLST,FH,ALDH1L1,IDH3G,IDH3B,IDH3A,IDH2,IDH1,NUDT12,MDH1,MDH2,OGDH,NCF2,PDHB,OGDHL,SDHA,MLYCD,NNT
GO: Biological Process	GO:0006353	DNA-dependent transcription, termination	2.316e-10	43	84	POLR1A,SRSF9,DHX38,PCF11,RBM8A,CSTF3,CSTF1,CDC40,ALYREF,SRSF11,CPSF7,POLR1C,RNPS1,PAPOLA,POLR3A,NUDT21,SRRM1,U2AF2,LIPE,UPF3B,MAGOH,MNAT1,NCBP1,CPSF1,POLR2E,POLR2H,POLR3E,SNRPG,SNRPD3,SNRPE,SNRPB,PTRF,SRSF7,SRSF1,SRSF2,SRSF5,SRSF3,SRSF4,XRN2,UBTF,U2AF1,CPSF2,POLR1B
GO: Biological Process	GO:0051436	negative regulation of ubiquitin-protein ligase activity involved in mitotic cell cycle	2.443e-10	37	67	CDC16,BUB3,CDC23,PSMD6,PSMD14,PSME3,PSMF1,ANAPC1,ANAPC4,PSMC5,PSMC4,PSMD1,PSMC6,PSMD3,PSMD2,PSMB8,PSMB9,PSMC2,PSMC1,PSME1,PSME2,PSMD7,PSMD11,PSMD12,PSMB6,PSMB7,PSMB4,PSMB5,PSMB2,PSMB3,PSMA7,PSMB1,PSMA5,PSMA3,PSMA4,PSMA1,RPS27A
GO: Biological Process	GO:0072395	signal transduction involved in cell cycle checkpoint	2.753e-10	38	70	CRADD,ATM,CDK2,CDKN1B,PSMD6,PSMD14,PSME3,PSMF1,PML,PSMC5,PSMC4,PSMD1,PSMC6,PSMD3,PSMD2,PSMB8,PSMB9,PSMC2,PSMC1,PSME1,PSME2,PSMD7,PSMD11,PSMD12,PSMB6,PSMB7,PSMB4,PSMB5,PSMB2,PSMB3,PSMA7,PSMB1,PSMA5,PSMA3,PSMA4,PSMA1,RPS27A,PSME4
GO: Biological Process	GO:0006979	response to oxidative stress	2.902e-10	104	290	ADA,ADRBK1,VNN1,ALDH1A1,ALDH3A2,ANXA1,APOA4,APOE,APEX1,RHOB,PDLIM1,PRDX5,BAK1,TXN2,BCL2,BTK,STK24,CAMK2G,ATRN,CAT,PNPT1,AKR1C3,CDK2,SIN3A,CDK1,COL1A1,CLU,OXSR1,HDAC6,TRAP1,CRYAB,CRYGD,LRRK2,CYP11A1,LONP1,NQO1,PRDX6,DPEP1,PTK2B,PRDX3,FER,CLN8,ETFDH,G6PD,GAB1,GCLC,STK25,GATM,GSTP1,TXNIP,GPX1,TXNRD2,FBLN5,GSS,GPX7,GPX5,HMOX2,HMOX1,IDH1,JAK2,PNKP,ITGAV,PARK7,MPO,MSRA,MAP3K5,MGST1,MGMT,MMP14,MMP9,MMP2…
GO: Biological Process	GO:0006468	protein phosphorylation	3.059e-10	362	1344	IQGAP1,NRP1,ACADVL,RIPK1,ADAM10,ADAR,ADCY3,ADD1,ADRBK1,ADRBK2,PRPF4B,AGT,AKT1,SQSTM1,AIF1,CPNE3,AKT2,SPAG9,BAZ1B,APOE,ARAF,RPS6KA4,ARRB1,ARRB2,DCLK1,ATM,ATP6V0D1,BAK1,BAX,BCL2,BTK,STK24,NCK2,FZD1,C5,CAMK2D,CAMK2G,IKBKAP,CALR,PRKRA,CASK,CDC42BPA,CAV1,SPDYA,NEK7,LAMTOR3,PRKD2,CDK2,CDK4,CDK6,CDC42,CDK11B,CDK1,CD81,CDK13,CD74,CD44,CHI3L1,PTPLAD1,SLK,CDK9,CDKN1B,CUL7,CCR1,USP15,SGK223,TPP1,OXSR1,ABI1,…
GO: Biological Process	GO:0043434	response to peptide hormone stimulus	3.357e-10	141	430	SERPINA3,ADCY3,PARP1,AKT1,AHSG,EIF2B2,EIF2B5,EIF2B4,EIF2B3,AKT2,GGH,ANXA1,APOC3,ATP6V0D1,ATP2A2,ATP6V1B1,ATP6V1B2,ATP6V0C,ATP6V0A1,ATP6V1E1,ATP6V1C1,BDH1,BCL2,FZD1,CDK2,CDK1,C2CD5,ATP6V1H,COL1A1,TBC1D4,ACSL5,CRK,AKT3,ATP6V1D,CTSB,CSK,DAG1,CYP11A1,CYC1,INPP5K,CAB39,EIF4B,EIF4G1,EIF2B1,FBP1,FER,GNB4,MTOR,GAB1,ADRM1,BAIAP2,GOT1,GNAS,GNB1,GNB2,GNAI1,TCIRG1,GFPT1,GATM,NUDC,HADH,HADHA,SORBS1,GRB2,GRB14…
GO: Biological Process	GO:1901659	glycosyl compound biosynthetic process	3.546e-10	57	128	ACACA,ADA,ADK,ADSL,ADSS,ADSSL1,AK2,AK1,ALDOA,GMPS,PAPSS2,PAPSS1,APRT,ATP1A3,ATP1A1,ATP1A2,ATP5C1,ATP5A1,ATP2B4,ATP2A3,ATP2A2,ATP2B1,ATP1B1,ATP5J,PPCDC,CDA,SLC25A13,CTPS1,DCTD,QTRTD1,TYMP,DUT,CECR1,DPYD,COASY,GBAS,GUK1,ATP5L,AK3,HPRT1,MAT2B,IMPDH2,IMPDH1,MTAP,CTPS2,MAT2A,NT5E,NME7,NME2,NME3,PRPS1,RP2,PRPS2,PID1,PANK4,UPP1,UMPS
GO: Biological Process	GO:0009163	nucleoside biosynthetic process	3.546e-10	57	128	ACACA,ADA,ADK,ADSL,ADSS,ADSSL1,AK2,AK1,ALDOA,GMPS,PAPSS2,PAPSS1,APRT,ATP1A3,ATP1A1,ATP1A2,ATP5C1,ATP5A1,ATP2B4,ATP2A3,ATP2A2,ATP2B1,ATP1B1,ATP5J,PPCDC,CDA,SLC25A13,CTPS1,DCTD,QTRTD1,TYMP,DUT,CECR1,DPYD,COASY,GBAS,GUK1,ATP5L,AK3,HPRT1,MAT2B,IMPDH2,IMPDH1,MTAP,CTPS2,MAT2A,NT5E,NME7,NME2,NME3,PRPS1,RP2,PRPS2,PID1,PANK4,UPP1,UMPS
GO: Biological Process	GO:0051270	regulation of cellular component movement	4.083e-10	163	517	AAMP,ABR,NRP1,NRP2,ACP5,ACTN1,ACTN4,ADAM10,ADA,AGT,AKT1,AIF1,AKT2,ANK2,SPAG9,ANXA3,APOE,APEX1,ARHGAP5,ARHGAP4,ATP1A1,ATP1A2,SUN2,BCL2,STK24,C1QBP,C5,CAMK2D,IKBKAP,CALR,PRKD2,CDK6,CLIC4,AOC3,CD74,CDKN1B,CCR1,COL1A1,HDAC6,CTSH,MAPK14,CSNK2B,DAPK3,DAB2,DAG1,SLC9A3R1,DIAPH1,MMRN2,ROCK2,ECM1,DSP,DSG2,DPYSL3,DPEP1,NUP155,PPM1F,EGFR,PTK2B,FGR,FER,FES,NISCH,CORO1A,GAB1,MIA3,GNB2L1,COL18A1,NCKAP1L,GNA13,H…
GO: Biological Process	GO:1901652	response to peptide	4.207e-10	143	439	SERPINA3,ADCY3,PARP1,AKT1,AHSG,EIF2B2,EIF2B5,EIF2B4,EIF2B3,AKT2,GGH,ANXA1,APOC3,ATP6V0D1,ATP2A2,ATP6V1B1,ATP6V1B2,ATP6V0C,ATP6V0A1,ATP6V1E1,ATP6V1C1,BDH1,BCL2,FZD1,CDK2,CDK1,C2CD5,ATP6V1H,COL1A1,TBC1D4,ACSL5,CRK,AKT3,ATP6V1D,CTSB,MAPK14,CSK,DAG1,CYP11A1,CYC1,INPP5K,CAB39,EIF4B,EIF4G1,EIF2B1,FBP1,FER,GNB4,MTOR,GAB1,ADRM1,BAIAP2,GOT1,GNAS,GNB1,GNB2,GNAI1,TCIRG1,GFPT1,GATM,NUDC,HADH,HADHA,SORBS1,GRB…
GO: Biological Process	GO:0032990	cell part morphogenesis	4.207e-10	221	751	NRP1,NRP2,AK7,ACTG1,CEP41,TCTN3,AP2B1,AP2A2,AP2A1,ALCAM,ANK2,ANK3,APOE,WASL,RPS6KA4,ARL3,DCLK1,ARHGAP4,ARHGDIA,RHOG,RHOB,ARHGEF1,PICALM,BCL2,STK24,NCK2,DST,FZD1,C21orf2,CACNB3,OFD1,PNPT1,NUMB,CDH11,PTPN23,CDC42,SEPT7,CDK1,EVL,CHN1,ARHGEF11,CNP,COL1A1,CNTN1,AP2M1,CLU,CLTA,CLTC,CRMP1,ABI1,ACTR3,COL5A2,COL6A1,COL6A2,COL6A3,COL4A1,COL3A1,COL4A3BP,COL4A2,DNM1L,CTNNA1,WASF2,CTNNA2,PLXNC1,FLOT1,TRPV2,CS…
GO: Biological Process	GO:0071826	ribonucleoprotein complex subunit organization	4.361e-10	54	119	PRPF31,LIMD1,SART1,C1QBP,LSM14A,EIF3D,SRSF9,GEMIN5,CIRBP,PQBP1,CRNKL1,WDR77,EFTUD1,DDX6,DDX3X,DDX1,DYNC1H1,GEMIN6,GEMIN4,SF3A3,TXNL4A,DDX20,PRMT5,CD2BP2,SF3A1,USP39,CELF2,PRPF19,PTBP2,KLC1,LSM2,KIF5B,EIF2A,MBNL1,CNOT7,NCBP1,TSR1,SNRPG,SNRPD1,SNRPD2,SNRPD3,SNRPE,SNRPB,SFSWAP,SRSF1,SRSF5,RPS15,PRPF6,SRPK2,SF1,SNRNP200,SF3A2,PUM2,DDX39B
GO: Biological Process	GO:0006790	sulfur compound metabolic process	4.521e-10	93	252	EIF2B2,EIF2B4,B3GAT3,PHGDH,PAPSS2,PAPSS1,NFS1,ARSB,GSTK1,BHMT,BGN,BTD,GLCE,SPOCK2,THTPA,COMT,CTNNB1,GGCT,CSAD,PCYOX1L,VCAN,CSPG4,PCYOX1,DCN,DNMT1,DNMT3A,DLD,DPEP1,EIF2B1,GPC4,EXTL3,G6PD,FMOD,GLO1,GCLC,GLB1,GOT1,GNS,BPNT1,APIP,GAMT,GALNS,GSTZ1,GSTT1,GSTP1,GSTM3,GSTM1,AGRN,HAGH,GPX1,GPC1,GSS,GSTA4,GNMT,SULT1C4,HEXA,HEXB,MAT2B,IDS,IDH1,HSPG2,LUM,TPK1,MTHFD1,MTHFR,MTAP,MSRA,MUT,MTR,MAT2A,MGST2,MGST3,…
GO: Biological Process	GO:0044087	regulation of cellular component biogenesis	4.862e-10	129	386	NAPA,ADD1,WASL,ARF6,ARHGAP6,BID,BAX,NCK2,CAPG,CAPZA1,CAPZA2,CAV1,CAPZB,CDC42,KANK2,BCLAF1,EVL,CDKN1B,CLU,HDAC6,ARPC2,ACTR3,ARPC3,ARPC1B,ARPC4,SORBS3,SNX9,DDX3X,DLG1,INPP5K,NUDT16,ROCK2,BAG5,DPYSL3,ARHGEF10,PPM1F,PTK2B,FER,FES,MPP7,FKBP4,EPHB3,MTOR,CORO1A,FAF1,TRIOBP,CRBN,CDC42EP2,GNB2L1,SH3GLB1,STUB1,HCK,HCFC1,NCKAP1L,HCLS1,AGRN,ARFGEF1,PDLIM5,GSN,GRB2,ARPC1A,HRG,IDE,ARPC5L,SPTBN4,EPB41L5,SYNPO,S…
GO: Biological Process	GO:0046459	short-chain fatty acid metabolic process	5.471e-10	25	37	ACADS,EIF2B2,EIF2B4,PHGDH,BHMT,EIF2B1,GOT1,APIP,GNMT,MTHFD1,MTHFR,MTAP,MSRA,MUT,MTR,PCCB,PCCA,ACSS2,SMS,SLC1A3,THNSL2,ADI1,ACSS1,MRI1,ALDH5A1
GO: Biological Process	GO:0000096	sulfur amino acid metabolic process	5.933e-10	29	47	EIF2B2,EIF2B4,NFS1,BHMT,COMT,CSAD,PCYOX1L,PCYOX1,DPEP1,EIF2B1,GCLC,GOT1,APIP,GNMT,MAT2B,MTHFD1,MTHFR,MTAP,MSRA,MUT,MTR,MAT2A,CNDP2,SMS,ADI1,SUOX,TST,ETHE1,MRI1
GO: Biological Process	GO:0034440	lipid oxidation	5.961e-10	47	98	ACAA1,ACADM,ACADS,ACADL,ACADVL,ACOX1,ADH7,AKT1,ABCD1,AKT2,ACOX3,SLC25A20,ACSL5,CPT1A,CRAT,CPT2,MAPK14,ECI1,DBI,DECR1,ECH1,CAB39,ACSL1,ETFDH,MTOR,ECI2,ACAA2,GCDH,HADHB,HADH,HADHA,HSD17B4,CAB39L,MUT,PCCB,PCCA,POR,PRKAG1,PRKAA1,PRKAB2,PRKAB1,CYP4V2,ABCD3,PEX5,AMACR,SCP2,MLYCD
GO: Biological Process	GO:0071158	positive regulation of cell cycle arrest	5.963e-10	42	83	CRADD,ATM,CDK2,CDKN1B,PSMD6,CRLF3,PSMD14,PSME3,PSMF1,MYBBP1A,PRKACA,PML,PSMC5,PSMC4,PSMD1,PSMC6,PSMD3,PSMD2,PSMB8,PSMB9,PSMC2,PSMC1,PSME1,PSME2,PSMD7,PSMD11,PSMD12,PSMB6,PSMB7,PSMB4,PSMB5,PSMB2,PSMB3,PSMA7,PSMB1,PSMA5,PSMA3,PSMA4,PSMA1,RPS27A,UHRF2,PSME4
GO: Biological Process	GO:0002576	platelet degranulation	5.963e-10	42	83	A2M,ACTN1,ACTN4,ACTN2,ALB,ALDOA,SERPING1,CALU,CALM3,CD9,CLU,WDR1,CFD,FGG,FGB,FGA,F13A1,FLNA,FN1,CAP1,ABCC4,HRG,HSPA5,KNG1,LYN,LAMP2,PFN1,SERPINF2,PLEK,PLG,SERPINA1,PSAP,SOD1,THBS1,TLN1,TF,STXBP1,SYK,HABP4,VWF,VCL,TUBA4A
GO: Biological Process	GO:0031145	anaphase-promoting complex-dependent proteasomal ubiquitin-dependent protein catabolic process	5.963e-10	42	83	CDC16,BUB3,CUL1,CDC23,CDK2,CDK1,PSMD6,PSMD14,PSME3,PSMF1,ANAPC1,ANAPC4,PSMC5,PSMC4,PSMD1,PSMC6,PSMD3,PSMD2,PSMB8,PSMB9,PSMC2,PSMC1,PSME1,PSME2,PSMD7,PSMD11,PSMD12,PSMB6,PSMB7,PSMB4,PSMB5,PSMB2,PSMB3,PSMA7,PSMB1,PSMA5,PSMA3,PSMA4,PSMA1,SKP1,RPS27A,PSME4
GO: Biological Process	GO:0051262	protein tetramerization	6.135e-10	45	92	ACACA,ACADM,ACADS,ACADL,ACTN2,ADSL,MTMR2,ALDH1A1,ALDOC,ALDOA,CAT,CDA,EVL,DNM1L,CRYZ,DECR1,CPSF7,FBP1,APOA1BP,CPSF6,NUDT21,GLS,DCXR,GFPT1,HSD17B10,GNMT,HPRT1,HMGCL,IDE,IMPDH2,PCBD1,PPAT,PEX14,PFKM,PFKP,PFKL,SRR,PEX5,SHMT1,SHMT2,RRM1,THG1L,VASP,TXNRD1,ALDH5A1
GO: Biological Process	GO:0048199	vesicle targeting, to, from or within Golgi	6.348e-10	21	28	GBF1,ARCN1,CUL3,SEC16A,SEC24D,COPA,COPB1,COPB2,SEC24C,TMED10,TMED2,SEC24A,SEC23A,SAR1B,SEC24B,COPE,ARFGAP1,TMED9,SEC13,COPG1,SEC31A
GO: Biological Process	GO:0051329	interphase of mitotic cell cycle	6.504e-10	139	426	CRADD,CEP41,AKT1,AIF1,NAE1,APEX1,ATM,BID,BCL2,CAMK2D,CAMK2G,CUL4B,CUL4A,CUL3,CUL2,CUL1,GIGYF2,OFD1,SPDYA,CDC23,CDK2,CDK4,CDK6,SIN3A,CDK1,KANK2,CDKN1B,CETN2,CKAP5,NEDD1,PSMD6,CRLF3,AKAP9,ACTR1A,PSMD14,PSME3,DCTN1,TBRG4,DDX3X,DYNC1H1,DYNC1I2,DNM2,DLG1,PSMF1,CDC73,EGFR,FEN1,FHL1,TUBGCP2,CEP250,CNTRL,MCMBP,TUBB4B,TUBGCP3,RPS27L,KHDRBS1,GSPT1,DCTN2,ANP32B,TUBGCP4,DNAJC2,LMNB1,MTA3,MCM4,MCM3,MCM6,MCM5,…
GO: Biological Process	GO:0034329	cell junction assembly	6.932e-10	70	173	ACTG1,ACTN1,ACTN2,ARHGAP6,BCL2,PIP5K1A,DST,GNPAT,CD9,CDH11,CDH3,CDH1,CTNNA1,CTNND1,CTNNB1,DLG1,ARHGEF6,ROCK2,PPM1F,PTK2B,FERMT2,MPP7,TRPV4,FLNC,FLNA,FN1,F11R,SORBS1,HRG,JUP,EPB41L5,ITGAV,ITGA5,ITGA6,ILK,SMAD3,LAMC1,LAMC2,LAMA3,KRT5,TLN2,MMP14,MLLT4,MTDH,PARVB,PKN2,PRKCA,PRKACA,LIMS2,PDPK1,PARVA,PLEC,ROCK1,PTK2,PVRL2,RSU1,CADM1,THY1,THBS1,TJP1,TLN1,TNS1,STRN,TBCD,FBF1,SRC,VCL,VASP,TRIP6,NEDD4L
GO: Biological Process	GO:0022618	ribonucleoprotein complex assembly	7.256e-10	52	114	PRPF31,LIMD1,SART1,C1QBP,LSM14A,EIF3D,SRSF9,GEMIN5,CIRBP,PQBP1,CRNKL1,WDR77,EFTUD1,DDX6,DDX3X,DDX1,DYNC1H1,GEMIN6,GEMIN4,SF3A3,TXNL4A,DDX20,PRMT5,CD2BP2,SF3A1,USP39,CELF2,PRPF19,PTBP2,LSM2,EIF2A,MBNL1,CNOT7,NCBP1,TSR1,SNRPG,SNRPD1,SNRPD2,SNRPD3,SNRPE,SNRPB,SFSWAP,SRSF1,SRSF5,RPS15,PRPF6,SRPK2,SF1,SNRNP200,SF3A2,PUM2,DDX39B
GO: Biological Process	GO:0043067	regulation of programmed cell death	7.491e-10	358	1336	AARS,RIPK1,CRADD,ACTN1,ACTN4,FAM162A,ACTN2,ADAR,ADA,TRADD,NOC2L,MBD4,SERBP1,AGT,VNN1,AKT1,ARHGEF7,AIF1,ALDH1A1,ALB,AKT2,NAE1,ALDH1A2,ANK2,UBE2M,ANXA4,ANXA5,APAF1,ANXA1,APOE,ARAF,AATF,ARRB1,ARRB2,ARHGDIA,RHOB,ATM,PDCD5,AIFM1,SART1,BAG1,BID,PRDX5,BAK1,BAX,RBM10,BCL2,BTK,STK24,FOXL2,NSMAF,C1QBP,C6,C9,C5,API5,CALR,PRKRA,CBL,CUL4A,CUL3,CUL2,CUL1,CAV1,CASP1,CASP7,CASP8,CAT,AKR1C3,PEA15,SIN3A,CDH1,CDC42…
GO: Biological Process	GO:0016042	lipid catabolic process	7.518e-10	96	265	ACAA1,ACADM,ACADS,ACADL,ACADVL,ACOX1,AKT1,SGPL1,ABCD1,AKT2,APOB,APOA4,APOA2,APOE,APOC3,APOC2,PLCD3,AZGP1,ACOX3,AKR1C3,PLA2G4C,SNX17,ACAP1,ACSL5,CPT1A,CRAT,CPT2,ECI1,DBI,DECR1,ECH1,PRDX6,SLC27A4,PNPLA6,ETFDH,FAAH,MTOR,PLBD1,ECI2,ACAA2,HSD17B11,GLA,ABHD5,GM2A,GALC,HADHB,HADH,HADHA,HSD17B4,ENPP6,HEXA,HEXB,MGLL,ACOT7,NCEH1,LIPE,LIPA,MUT,PAFAH1B2,PCCB,PCCA,NAGA,DAGLB,PPP1CC,PPP1CA,IAH1,PRKACG,PRKAA1,P…
GO: Biological Process	GO:0006099	tricarboxylic acid cycle	7.624e-10	20	26	SUCLG1,SUCLA2,ACO2,ACO1,CS,DLD,DLST,FH,IDH3G,IDH3B,IDH3A,IDH2,IDH1,MDH1,MDH2,OGDH,PDHB,OGDHL,SDHA,NNT
GO: Biological Process	GO:0051325	interphase	8.097e-10	141	435	CRADD,CEP41,AKT1,AIF1,NAE1,APEX1,ATM,BID,BCL2,CAMK2D,CAMK2G,CUL4B,CUL4A,CUL3,CUL2,CUL1,GIGYF2,OFD1,SPDYA,CDC23,CDK2,CDK4,CDK6,SIN3A,CDK1,KANK2,CDKN1B,CETN2,CKAP5,NEDD1,PSMD6,CREBBP,CRLF3,AKAP9,ACTR1A,PSMD14,PSME3,DCTN1,TBRG4,DDX3X,DYNC1H1,DYNC1I2,DNM2,DLG1,PSMF1,CDC73,EGFR,FEN1,FHL1,TUBGCP2,CEP250,CNTRL,MCMBP,TUBB4B,TUBGCP3,RPS27L,KHDRBS1,GSPT1,DCTN2,ANP32B,TUBGCP4,DNAJC2,LMNB1,MTA3,MCM4,MCM3,MCM…
GO: Biological Process	GO:0006974	response to DNA damage stimulus	8.732e-10	190	630	FBXO6,CRADD,ACTL6A,PARP1,MBD4,ASH2L,BAZ1B,APEX1,AATF,ATM,SMC3,USP10,ATRX,BAX,NIPBL,SMC1A,BCL2,SMARCA5,CUL4B,CUL4A,MRPS35,SPDYA,INTS7,CDK2,RUVBL1,CDK1,CD74,CD44,BCLAF1,CDK9,CDKN1B,CETN2,BRCC3,PSMD6,ZBTB40,PARP3,PARP2,RAD50,HUWE1,TAOK3,TRIM28,UCHL5,UBR5,MAPK14,PSMD14,PSME3,FTO,DDB1,DDX5,DDX1,MAPKAPK2,TRIP12,NEIL2,TIPRL,PSMF1,NUDT16,CHD1L,BRE,EGFR,FEN1,ASCC3,MORF4L1,ERCC4,RUVBL2,POLG2,POLI,SUPT16H,X…
GO: Biological Process	GO:0046033	AMP metabolic process	8.936e-10	13	13	ADK,ADSL,ADSS,ADSSL1,AK4,AK2,AK1,AMPD3,APRT,AK3,NT5E,PRPS1,PRPS2
GO: Biological Process	GO:1901653	cellular response to peptide	9.063e-10	108	310	ADCY3,PARP1,AKT1,AHSG,AKT2,ATP6V0D1,ATP6V1B1,ATP6V1B2,ATP6V0C,ATP6V0A1,ATP6V1E1,ATP6V1C1,FZD1,CDK2,CDK1,C2CD5,ATP6V1H,TBC1D4,ACSL5,CRK,AKT3,ATP6V1D,CSK,CYP11A1,INPP5K,CAB39,EIF4B,EIF4G1,FBP1,FER,GNB4,MTOR,GAB1,ADRM1,BAIAP2,GOT1,GNAS,GNB1,GNB2,TCIRG1,GFPT1,SORBS1,GRB2,GRB14,IDE,JAK2,INPPL1,LYN,CAB39L,KRAS,YBX1,PAK1,MYO5A,EEF2K,PPM1A,PPAT,POR,MAP2K1,MAP2K2,PRKDC,MAPK3,MAPK1,PRKAR1A,PRKAG1,PRKACG,PR…
GO: Biological Process	GO:0071375	cellular response to peptide hormone stimulus	9.063e-10	108	310	ADCY3,PARP1,AKT1,AHSG,AKT2,ATP6V0D1,ATP6V1B1,ATP6V1B2,ATP6V0C,ATP6V0A1,ATP6V1E1,ATP6V1C1,FZD1,CDK2,CDK1,C2CD5,ATP6V1H,TBC1D4,ACSL5,CRK,AKT3,ATP6V1D,CSK,CYP11A1,INPP5K,CAB39,EIF4B,EIF4G1,FBP1,FER,GNB4,MTOR,GAB1,ADRM1,BAIAP2,GOT1,GNAS,GNB1,GNB2,TCIRG1,GFPT1,SORBS1,GRB2,GRB14,IDE,JAK2,INPPL1,LYN,CAB39L,KRAS,YBX1,PAK1,MYO5A,EEF2K,PPM1A,PPAT,POR,MAP2K1,MAP2K2,PRKDC,MAPK3,MAPK1,PRKAR1A,PRKAG1,PRKACG,PR…
GO: Biological Process	GO:0051726	regulation of cell cycle	9.065e-10	229	790	FBXO6,CRADD,MBD4,AKT1,AK1,AIF1,AKT2,CDC16,NAE1,UBA3,APEX1,AATF,BUB3,RHOB,ZW10,ATM,SMC3,SART1,TRRAP,BID,BAK1,BAX,SMC1A,BCL2,DST,CAMK2D,CALR,CUL4B,CUL4A,CUL3,CUL2,CUL1,PKP4,SPDYA,PNPT1,NEK7,CDC23,INTS7,CDK2,CDK4,CDK6,CDC42,CDK11B,SH2B1,CDK1,CDK13,KANK2,CDK9,CDKN1B,BRCC3,PSMD6,MFN2,CREBBP,TAOK3,CTNNB1,CTBP1,CRLF3,MAPK14,PSMD14,CSNK2A2,PSME3,DDB1,TBRG4,DDX3X,DAPK3,MAPKAPK2,CYLD,TIPRL,DLG1,PSMF1,NUDT1…
GO: Biological Process	GO:0035383	thioester metabolic process	9.14e-10	47	99	SUCLG1,SUCLA2,ACACA,ACADSB,ACO2,ACO1,KYNU,DGAT1,ACSL5,CS,DBT,DLD,DLST,SLC27A3,FASN,ACSL3,ACSL1,ACSL4,FH,ACAA2,GCDH,HSD17B4,HMGCL,IDH3G,IDH3B,IDH3A,IDH2,IDH1,MDH1,MDH2,OGDH,PDHB,PDK3,PDK2,OGDHL,ACSS2,SLC25A1,SDHA,PDP1,ACOT9,SCP2,PDPR,ACSS1,ACSL6,MLYCD,PDHX,NNT
GO: Biological Process	GO:0006637	acyl-CoA metabolic process	9.14e-10	47	99	SUCLG1,SUCLA2,ACACA,ACADSB,ACO2,ACO1,KYNU,DGAT1,ACSL5,CS,DBT,DLD,DLST,SLC27A3,FASN,ACSL3,ACSL1,ACSL4,FH,ACAA2,GCDH,HSD17B4,HMGCL,IDH3G,IDH3B,IDH3A,IDH2,IDH1,MDH1,MDH2,OGDH,PDHB,PDK3,PDK2,OGDHL,ACSS2,SLC25A1,SDHA,PDP1,ACOT9,SCP2,PDPR,ACSS1,ACSL6,MLYCD,PDHX,NNT
GO: Biological Process	GO:0006635	fatty acid beta-oxidation	9.333e-10	34	61	ACAA1,ACADM,ACADS,ACADL,ACADVL,ACOX1,AKT1,ABCD1,AKT2,ACOX3,ACSL5,CPT1A,CRAT,CPT2,ECI1,DBI,DECR1,ECH1,ETFDH,MTOR,ECI2,ACAA2,HADHB,HADH,HADHA,HSD17B4,MUT,PCCB,PCCA,ABCD3,PEX5,AMACR,SCP2,MLYCD
GO: Biological Process	GO:0033238	regulation of cellular amine metabolic process	9.416e-10	41	81	BHMT,PSMD6,COMT,PSMD14,PSME3,NQO1,PSMF1,ACSL3,LPCAT1,HPRT1,MAOB,PEBP1,PAOX,PSMC5,PSMC4,PSMD1,PSMC6,PSMD3,PSMD2,PSMB8,PSMB9,PSMC2,PSMC1,PSME1,PSME2,PSMD7,PSMD11,PSMD12,PSMB6,PSMB7,PSMB4,PSMB5,PSMB2,PSMB3,PSMA7,PSMB1,PSMA5,PSMA3,PSMA4,PSMA1,PSME4
GO: Biological Process	GO:0018279	protein N-linked glycosylation via asparagine	9.576e-10	45	93	DPM1,CANX,CALR,MLEC,STT3B,SEC24D,ALG12,ALG3,DDOST,DAD1,ALG9,SEC24C,MAN1A2,SEC24A,MAN1B1,FUT8,SEC23A,SAR1B,SEC24B,GFPT1,PDIA3,STT3A,LMAN1,MAN1A1,MAN2A1,MGAT1,MPI,UGGT1,ALG5,GMPPB,GMPPA,GNPNAT1,PRKCSH,PGM3,PMM2,MCFD2,SEC13,RPN2,RPN1,ALG2,SEC31A,VCP,MOGS,GANAB,SYVN1
GO: Biological Process	GO:0042981	regulation of apoptotic process	1.028e-09	354	1322	AARS,RIPK1,CRADD,ACTN1,ACTN4,FAM162A,ACTN2,ADAR,ADA,TRADD,NOC2L,MBD4,SERBP1,AGT,VNN1,AKT1,ARHGEF7,AIF1,ALDH1A1,ALB,AKT2,NAE1,ALDH1A2,ANK2,UBE2M,ANXA4,ANXA5,APAF1,ANXA1,APOE,ARAF,AATF,ARRB1,ARRB2,ARHGDIA,RHOB,ATM,PDCD5,AIFM1,SART1,BAG1,BID,PRDX5,BAK1,BAX,RBM10,BCL2,BTK,STK24,FOXL2,NSMAF,C1QBP,C6,C9,C5,API5,CALR,PRKRA,CBL,CUL4A,CUL3,CUL2,CUL1,CAV1,CASP1,CASP7,CASP8,CAT,AKR1C3,PEA15,SIN3A,CDH1,CDC42…
GO: Biological Process	GO:0006887	exocytosis	1.084e-09	104	296	A2M,VPS33B,ABR,NAPA,SNAP23,ACTN1,ACTN4,ACTN2,ALB,ALDOA,ANXA3,BTK,SERPING1,CALU,CALM3,CD9,SCRN1,CCR1,CLU,WDR1,GNPDA1,UNC13D,RAB9A,CFD,RAB3D,EXOC8,TMED10,FGR,FGG,FGB,FGA,FES,F13A1,CHP1,FLNA,FN1,MIA3,SERPINA10,CAP1,ABCC4,HCK,YKT6,EXOC5,ARFGEF2,ARFGEF1,HRG,HSPA5,HMOX1,KNG1,ZP4,VPS45,EXOC3,LYN,LLGL1,LAMP2,MYO1F,RAB8A,NSF,PAK1,MYO5A,NCAM1,SEPT5,PRKCA,PPP3CB,PFN2,PFN1,PDPK1,SERPINF2,PLEK,PLG,PLD2,PIK3C2…
GO: Biological Process	GO:0051129	negative regulation of cellular component organization	1.217e-09	123	368	NRP1,ADD1,NOC2L,MTMR2,AKT1,CDC16,APOA2,APOC3,APOC2,ARF6,ARHGAP6,ARHGAP4,ARHGDIA,BUB3,ARHGEF2,ATM,ARHGEF1,PICALM,CAPG,CAPZA1,CAPZA2,CAPZB,POT1,CDC23,SIN3A,CDC42,KANK2,EVL,LIMA1,CLU,HDAC6,CTBP1,UBR5,CSPG4,CSK,LRRK2,DDX3X,TRIP12,DNMT1,DGUOK,INPP5K,DPYSL3,DPP4,FKBP4,TRPV4,ERCC4,PACSIN2,CORO1A,TRIOBP,CRBN,VAT1,DYNC1LI1,GNB2L1,GDI1,HDAC2,ARFGEF1,GSN,HRG,SPTBN4,INPPL1,LGALS1,STMN1,MAP1B,MAP1A,MTPN,MECP2…
GO: Biological Process	GO:0051444	negative regulation of ubiquitin-protein ligase activity	1.37e-09	38	73	CDC16,BUB3,CDC23,PSMD6,PSMD14,PSME3,PSMF1,BAG5,ANAPC1,ANAPC4,PSMC5,PSMC4,PSMD1,PSMC6,PSMD3,PSMD2,PSMB8,PSMB9,PSMC2,PSMC1,PSME1,PSME2,PSMD7,PSMD11,PSMD12,PSMB6,PSMB7,PSMB4,PSMB5,PSMB2,PSMB3,PSMA7,PSMB1,PSMA5,PSMA3,PSMA4,PSMA1,RPS27A
GO: Biological Process	GO:0051352	negative regulation of ligase activity	1.37e-09	38	73	CDC16,BUB3,CDC23,PSMD6,PSMD14,PSME3,PSMF1,BAG5,ANAPC1,ANAPC4,PSMC5,PSMC4,PSMD1,PSMC6,PSMD3,PSMD2,PSMB8,PSMB9,PSMC2,PSMC1,PSME1,PSME2,PSMD7,PSMD11,PSMD12,PSMB6,PSMB7,PSMB4,PSMB5,PSMB2,PSMB3,PSMA7,PSMB1,PSMA5,PSMA3,PSMA4,PSMA1,RPS27A
GO: Biological Process	GO:0031571	mitotic G1 DNA damage checkpoint	1.438e-09	39	76	CRADD,ATM,CDK2,CDKN1B,PSMD6,PSMD14,PSME3,PSMF1,RPS27L,PML,PSMC5,PSMC4,PSMD1,PSMC6,PSMD3,PSMD2,PSMB8,PSMB9,PSMC2,PSMC1,PSME1,PSME2,PSMD7,PSMD11,PSMD12,PSMB6,PSMB7,PSMB4,PSMB5,PSMB2,PSMB3,PSMA7,PSMB1,PSMA5,PSMA3,PSMA4,PSMA1,RPS27A,PSME4
GO: Biological Process	GO:0042455	ribonucleoside biosynthetic process	1.447e-09	53	119	ACACA,ADA,ADK,ADSL,ADSS,ADSSL1,AK2,AK1,ALDOA,GMPS,PAPSS2,PAPSS1,APRT,ATP1A3,ATP1A1,ATP1A2,ATP5C1,ATP5A1,ATP2B4,ATP2A3,ATP2A2,ATP2B1,ATP1B1,ATP5J,PPCDC,SLC25A13,CTPS1,QTRTD1,CECR1,DPYD,COASY,GBAS,GUK1,ATP5L,AK3,HPRT1,MAT2B,IMPDH2,IMPDH1,MTAP,CTPS2,MAT2A,NT5E,NME7,NME2,NME3,PRPS1,RP2,PRPS2,PID1,PANK4,UPP1,UMPS
GO: Biological Process	GO:0046496	nicotinamide nucleotide metabolic process	1.457e-09	33	59	KYNU,PGLS,PRDX5,KMO,DLST,H6PD,FDXR,G6PD,HIBADH,DCXR,GPD2,GPD1,IDH3G,IDH3B,IDH3A,IDH1,NADKD1,LDHA,NUDT12,MDH1,MDH2,OGDH,NCF2,PGD,PGAM1,TKT,TALDO1,GLYR1,TXNRD1,QPRT,HAAO,GPD1L,NAPRT1
GO: Biological Process	GO:0019362	pyridine nucleotide metabolic process	1.457e-09	33	59	KYNU,PGLS,PRDX5,KMO,DLST,H6PD,FDXR,G6PD,HIBADH,DCXR,GPD2,GPD1,IDH3G,IDH3B,IDH3A,IDH1,NADKD1,LDHA,NUDT12,MDH1,MDH2,OGDH,NCF2,PGD,PGAM1,TKT,TALDO1,GLYR1,TXNRD1,QPRT,HAAO,GPD1L,NAPRT1
GO: Biological Process	GO:0018196	peptidyl-asparagine modification	1.48e-09	45	94	DPM1,CANX,CALR,MLEC,STT3B,SEC24D,ALG12,ALG3,DDOST,DAD1,ALG9,SEC24C,MAN1A2,SEC24A,MAN1B1,FUT8,SEC23A,SAR1B,SEC24B,GFPT1,PDIA3,STT3A,LMAN1,MAN1A1,MAN2A1,MGAT1,MPI,UGGT1,ALG5,GMPPB,GMPPA,GNPNAT1,PRKCSH,PGM3,PMM2,MCFD2,SEC13,RPN2,RPN1,ALG2,SEC31A,VCP,MOGS,GANAB,SYVN1
GO: Biological Process	GO:0009062	fatty acid catabolic process	1.487e-09	40	79	ACAA1,ACADM,ACADS,ACADL,ACADVL,ACOX1,AKT1,ABCD1,AKT2,ACOX3,ACSL5,CPT1A,CRAT,CPT2,ECI1,DBI,DECR1,ECH1,SLC27A4,ETFDH,FAAH,MTOR,ECI2,ACAA2,HADHB,HADH,HADHA,HSD17B4,ACOT7,MUT,PCCB,PCCA,ABCD3,PEX5,PLA2G15,AMACR,SCP2,MLYCD,ALDH5A1,LPIN1
GO: Biological Process	GO:0034330	cell junction organization	1.54e-09	77	200	ACTG1,ACTN1,ACTN2,ARHGAP6,BCL2,PIP5K1A,DST,GNPAT,NUMB,CD9,CDH11,CDH3,CDH1,CDC42,CTNNA1,CTNND1,CTNNB1,DLG1,ARHGEF6,RAB8B,ROCK2,DSP,PPM1F,PTK2B,FERMT2,MPP7,TRPV4,FLNC,FLNA,FN1,F11R,SORBS1,HRG,JUP,EPB41L5,ITGAV,ITGA5,ITGA6,ILK,SMAD3,LAMC1,LAMC2,LAMA3,KRT5,TLN2,CCM2,MMP14,MLLT4,MTDH,NF2,PARVB,PKN2,PRKCA,PRKACA,LIMS2,PDPK1,PARVA,PLEC,ROCK1,PTK2,RAC1,PVRL2,RSU1,CADM1,THY1,THBS1,TJP1,TLN1,TNS1,STRN,TBCD…
GO: Biological Process	GO:0007050	cell cycle arrest	1.589e-09	132	404	FBXO6,CRADD,MBD4,AKT1,AK1,AKT2,CDC16,NAE1,BUB3,ZW10,ATM,SART1,TRRAP,SMC1A,DST,CALR,CUL4A,CUL3,CUL2,CUL1,PNPT1,CDC23,INTS7,CDK2,CDK6,CDK1,CDK9,CDKN1B,BRCC3,PSMD6,MFN2,TAOK3,CRLF3,MAPK14,PSMD14,CSNK2A2,PSME3,DDB1,TBRG4,MAPKAPK2,TIPRL,DLG1,PSMF1,CAB39,BRE,EIF4G2,DYNC1LI1,NDRG1,RPS27L,KHDRBS1,H2AFX,MYBBP1A,HTRA2,ILK,TAOK1,SMAD3,CAB39L,MRE11A,MSH2,INTS3,MEN1,MCM4,MCM3,MCM6,MCM5,MCM2,MCM7,MIF,ORC4,ANAP…
GO: Biological Process	GO:0097194	execution phase of apoptosis	1.605e-09	97	272	RIPK1,CRADD,FAM162A,TRADD,ADD1,MBD4,AKT1,APAF1,ATM,AIFM1,SART1,BID,BAK1,BAX,BCL2,BTK,STK24,FOXL2,CUL4A,CUL3,CUL2,CUL1,CAV1,CASP7,CASP8,CDH1,BCLAF1,CLU,PDCD6,DNM1L,CTNNB1,GGCT,DDX5,DDX3X,DAPK3,CYLD,TJP2,DSP,DSG2,ENDOG,PPM1F,GNB2L1,SH3GLB1,NDUFA13,RPS27L,FIS1,MSH6,HTT,GPX1,MYBBP1A,GSN,HMOX1,HMGB2,UBE2K,HTRA2,IFI16,KPNA1,KPNB1,JAK2,ITPR1,PARK7,SMAD3,LMNB1,LMNA,MSH2,MAPT,MAP3K5,MLH1,OPA1,ERO1L,PAK2,M…
GO: Biological Process	GO:2000045	regulation of G1/S transition of mitotic cell cycle	1.778e-09	50	110	CRADD,AIF1,ATM,BID,CDK2,KANK2,CDKN1B,PSMD6,PSMD14,PSME3,DDX3X,DLG1,PSMF1,CDC73,FHL1,RPS27L,NBN,PML,PSMC5,PSMC4,PSMD1,PSMC6,PSMD3,PSMD2,PSMB8,PSMB9,PSMC2,PSMC1,PSME1,PSME2,PSMD7,PSMD11,PSMD12,PSMB6,PSMB7,PSMB4,PSMB5,PSMB2,PSMB3,PSMA7,PSMB1,PSMA5,PSMA3,PSMA4,PSMA1,PTPN6,PURA,RPS27A,PID1,PSME4
GO: Biological Process	GO:0006084	acetyl-CoA metabolic process	1.918e-09	31	54	SUCLG1,SUCLA2,ACACA,ACO2,ACO1,KYNU,CS,DLD,DLST,FH,ACAA2,IDH3G,IDH3B,IDH3A,IDH2,IDH1,MDH1,MDH2,OGDH,PDHB,PDK3,PDK2,OGDHL,ACSS2,SDHA,PDP1,PDPR,ACSS1,MLYCD,PDHX,NNT
GO: Biological Process	GO:0046356	acetyl-CoA catabolic process	2.38e-09	20	27	SUCLG1,SUCLA2,ACO2,ACO1,CS,DLD,DLST,FH,IDH3G,IDH3B,IDH3A,IDH2,IDH1,MDH1,MDH2,OGDH,PDHB,OGDHL,SDHA,NNT
GO: Biological Process	GO:0051188	cofactor biosynthetic process	2.386e-09	59	140	SUCLA2,ACACA,KYNU,ALAD,NFS1,ATIC,PDXK,KMO,PPCDC,MTHFD1L,ACSL5,CPOX,ABCB6,DBT,DLD,FASN,ACSL3,ACSL1,ACSL4,FECH,COASY,FLAD1,G6PD,GART,COQ6,GPHN,GCDH,HMBS,MAT2B,NADKD1,IREB2,TPK1,MTHFD1,MAT2A,COQ9,PCBD1,PPOX,PDHB,PDK3,PDK2,ACSS2,QDPR,SLC25A1,PDP1,PANK4,SPTB,SPTA1,PNPO,SPR,PDPR,ACSS1,UROD,ACSL6,MLYCD,PDHX,QPRT,HAAO,COQ5,NAPRT1
GO: Biological Process	GO:0010941	regulation of cell death	2.792e-09	366	1385	AARS,RIPK1,CRADD,ACTN1,ACTN4,FAM162A,ACTN2,ADAR,ADA,TRADD,NOC2L,MBD4,SERBP1,AGT,VNN1,AKT1,ARHGEF7,AIF1,ALDH1A1,ALB,AKT2,NAE1,ALDH1A2,ANK2,UBE2M,ANXA4,ANXA5,APAF1,SLC25A4,ANXA1,APOE,ARAF,AATF,ARRB1,ARRB2,ARHGDIA,RHOB,ATM,PDCD5,AIFM1,SART1,BAG1,BID,PRDX5,BAK1,BAX,RBM10,BCL2,BTK,STK24,FOXL2,NSMAF,C1QBP,C6,C9,C5,API5,CALR,PRKRA,CBL,CUL4A,CUL3,CUL2,CUL1,CAV1,CASP1,CASP7,CASP8,CAT,AKR1C3,PEA15,SIN3A,CD…
GO: Biological Process	GO:0022403	cell cycle phase	2.874e-09	253	900	CRADD,CEP41,ADCY3,AKT1,AIF1,CDC16,NAE1,APEX1,BUB3,ARHGEF2,ZW10,ATM,SMC3,SUN2,CLTCL1,BID,NIPBL,USP9X,SMC1A,BCL2,CAMK2D,CAMK2G,CALR,CUL4B,CUL4A,CUL3,CUL2,CUL1,GIGYF2,OFD1,SPDYA,NEK7,CDC23,AHCTF1,CDK2,CDK4,CDK6,RUVBL1,SIN3A,CDC42,CDK11B,SEPT7,SH2B1,CDK1,CDK13,KANK2,CHD3,CDKN1B,CETN2,CKAP5,NEDD1,PSMD6,CLTC,CREBBP,RAD50,NUP37,CRLF3,AKAP9,ACTR1A,PSMD14,PSME3,CSNK1A1,DCTN1,NOLC1,TBRG4,DDX3X,DAPK3,DIS3L2…
GO: Biological Process	GO:0006200	ATP catabolic process	3.222e-09	56	131	ACTC1,ABCC3,ABCD1,ASNA1,ATP1A1,ATP5C1,ATP6V0D1,ATP5A1,ATP2A2,ATP6V0C,ATP5J,ATP6V1C1,SMARCA5,ENTPD1,ATP6V1H,PSMD6,DDX5,DDX3X,LONP1,MYH14,VPS4B,CHD1L,ASCC3,RUVBL2,CLPX,SMARCAL1,ABCA8,MSH6,ATP5L,IPO8,HSPA8,HSPA5,IDE,RNF213,MSH2,MLH1,WRNIP1,NSF,MYH9,ATP8B2,MYO9B,OLA1,PPP2R4,PSMC5,PSMC4,PSMC6,PSMC2,PSMC1,ABCD3,HLTF,SMARCA4,TOP1,TOP2A,ACIN1,VCP,KIF1B
GO: Biological Process	GO:0008610	lipid biosynthetic process	3.224e-09	183	611	DPM1,ACACA,ACADL,ACADVL,MTMR1,MTMR2,AGT,AKT1,SGPL1,EIF2B2,ALDH1A1,EIF2B4,ALDH1A2,ALOX15,ALOX5,ANXA1,APOB,APOA4,APOA2,APOE,APOC3,APOC2,ATP1A1,ATM,MTMR6,BHMT,PIP5K1A,GNPAT,AGPS,DEGS1,AKR1C3,DGAT1,PLA2G4C,CD81,CD74,ISYNA1,PTPLAD1,FIG4,PIGT,LPGAT1,ACSL5,CYB5R1,PIGK,COL4A3BP,ALG12,RDH10,VAPB,DBI,CYP11A1,COLGALT1,CYP27A1,CYP17A1,ALG9,CYP7B1,CYB5R3,QKI,GGPS1,PCYT1B,INPP5K,SPTLC2,EIF2B1,FASN,ACSL3,ACSL1,…
GO: Biological Process	GO:0032869	cellular response to insulin stimulus	3.236e-09	86	235	PARP1,AKT1,AHSG,AKT2,ATP6V0D1,ATP6V1B1,ATP6V1B2,ATP6V0C,ATP6V0A1,ATP6V1E1,ATP6V1C1,CDK2,CDK1,C2CD5,ATP6V1H,TBC1D4,ACSL5,CRK,AKT3,ATP6V1D,INPP5K,CAB39,EIF4B,EIF4G1,FBP1,FER,MTOR,GAB1,BAIAP2,GOT1,TCIRG1,GFPT1,SORBS1,GRB2,GRB14,IDE,INPPL1,CAB39L,KRAS,YBX1,PAK1,MYO5A,EEF2K,PPM1A,PPAT,MAP2K1,MAP2K2,PRKDC,MAPK3,MAPK1,PRKAG1,PRKCA,PRKCB,PRKAA1,PRKAB2,PRKAB1,ENPP1,PDPK1,DENND4C,PIK3C2A,PIK3CA,PIK3C3,PIK3…
GO: Biological Process	GO:0051056	regulation of small GTPase mediated signal transduction	3.258e-09	133	412	A2M,ARFGAP3,ABCA1,IQGAP1,ABR,GBF1,GAPVD1,SQSTM1,ARHGEF7,ALDH1A1,AKT2,APOE,APOC3,ARF6,ARRB1,ARHGAP6,ARHGAP5,ARHGAP4,ARHGAP1,ARHGDIB,ARHGDIA,RHOG,RHOB,ARHGEF2,ARHGEF1,PIP5K1A,CAMK2D,TBC1D10B,CDC42BPA,CUL3,PKP4,CDC42,TBC1D5,DOCK4,CHN1,ACAP1,ARHGEF11,GIT2,G3BP2,TBC1D4,IQSEC1,MFN2,ARHGAP25,CRK,FARP1,FLOT1,CYTH1,TRIP10,TBC1D17,ARHGEF6,DOCK2,ARHGEF10,FBP1,RHOT2,PTK2B,ITSN2,ERBB2,EPHB3,IQGAP2,MTOR,AKAP13…
GO: Biological Process	GO:0006733	oxidoreduction coenzyme metabolic process	3.412e-09	36	69	KYNU,PGLS,PRDX5,KMO,DLST,H6PD,FDXR,G6PD,HIBADH,DCXR,COQ6,GPD2,GPD1,IDH3G,IDH3B,IDH3A,IDH1,NADKD1,LDHA,NUDT12,MDH1,MDH2,OGDH,COQ9,NCF2,PGD,PGAM1,TKT,TALDO1,GLYR1,TXNRD1,QPRT,HAAO,COQ5,GPD1L,NAPRT1
GO: Biological Process	GO:0043547	positive regulation of GTPase activity	3.489e-09	64	158	IQGAP1,ARHGEF7,ALDH1A1,AKT2,BIN1,ARRB1,ARHGAP6,ARHGAP5,ARHGAP4,RHOG,RAB3GAP2,PIP5K1A,TBC1D10B,PKP4,RIC8A,DOCK4,PTPLAD1,SNX9,LRRK2,ARHGEF6,DOCK1,PTK2B,ERBB2,VAV3,CDC42EP2,GNB2L1,GNAQ,NCKAP1L,ARHGAP35,PREX1,LLGL1,SNX18,RALGAPA2,MYO9B,TBC1D15,RALGAPB,NF1,TBC1D2,MAP2K1,ARHGAP9,ARFGAP1,PIN1,RGS7,RAP1GDS1,RANGAP1,RASA1,RP2,DAB2IP,ARAP1,SIPA1,RABGAP1,RALGAPA1,THY1,SYDE1,TBCD,DOCK7,RASA3,RAB3GAP1,TSC2,SR…
GO: Biological Process	GO:0048667	cell morphogenesis involved in neuron differentiation	3.632e-09	185	620	NRP1,NRP2,ACTG1,AP2B1,AP2A2,AP2A1,ALCAM,ANK2,ANK3,APOE,WASL,RPS6KA4,DCLK1,ARHGAP4,ARHGDIA,RHOG,RHOB,ARHGEF1,PICALM,BCL2,STK24,NCK2,DST,FZD1,CACNB3,NUMB,CDH11,CDC42,CDK1,EVL,CHN1,ARHGEF11,CNP,COL1A1,CNTN1,AP2M1,CLTA,CLTC,CRMP1,ACTR3,COL5A2,COL6A1,COL6A2,COL6A3,COL4A1,COL3A1,COL4A2,CTNNA1,CTNNA2,PLXNC1,FLOT1,TRPV2,CSNK2A2,CSNK2B,VCAN,LRRK2,DLG1,MYH14,ROCK2,DPYSL3,DPYSL2,DOCK1,EGFR,STIP1,AFG3L2,FES,…
GO: Biological Process	GO:0009083	branched-chain amino acid catabolic process	3.751e-09	16	19	HIBCH,ACAT1,ACADSB,BCAT2,BCKDHB,DBT,DLD,HIBADH,BCKDK,HSD17B10,HMGCL,IVD,ACAD8,ALDH6A1,MCCC1,MCCC2
GO: Biological Process	GO:0051443	positive regulation of ubiquitin-protein ligase activity	3.806e-09	41	84	CDC16,CUL1,CDC23,CDK1,PSMD6,PSMD14,PSME3,PSMF1,ANAPC1,ANAPC4,PIN1,PSMC5,PSMC4,PSMD1,PSMC6,PSMD3,PSMD2,PSMB8,PSMB9,PSMC2,PSMC1,PSME1,PSME2,PSMD7,PSMD11,PSMD12,PSMB6,PSMB7,PSMB4,PSMB5,PSMB2,PSMB3,PSMA7,PSMB1,PSMA5,PSMA3,PSMA4,PSMA1,SKP1,RPS27A,PSME4
GO: Biological Process	GO:0006892	post-Golgi vesicle-mediated transport	3.806e-09	41	84	NAPA,SNAP23,GBF1,AP1M1,AP1S2,AP1B1,AP2A1,AP1G1,ANK3,ARRB1,STX7,RAB14,DOPEY2,VPS29,CLTA,CLTC,SCAMP3,ARFRP1,CSK,DNM2,CLINT1,PUM1,ACSL3,LYPLA1,EXOC5,ARFGEF2,HSPA8,LYPLAL1,TXNDC5,LLGL1,SH3D19,GOPC,KIF16B,PLCB3,KIF13A,SORT1,SPTBN1,AP3B2,MON2,VPS13A,SCFD1
GO: Biological Process	GO:0009066	aspartate family amino acid metabolic process	4.181e-09	26	42	ADSS,EIF2B2,EIF2B4,PHGDH,ALDH7A1,BHMT,DLD,DLST,EIF2B1,ASRGL1,THNSL1,GOT2,GOT1,APIP,GCDH,GNMT,MTHFD1,MTHFR,MTAP,MSRA,MTR,OGDH,SMS,THNSL2,ADI1,MRI1
GO: Biological Process	GO:0010564	regulation of cell cycle process	4.548e-09	146	465	FBXO6,CRADD,MBD4,AKT1,AIF1,AKT2,CDC16,NAE1,APEX1,BUB3,ZW10,ATM,SMC3,TRRAP,BID,SMC1A,CAMK2D,CALR,CUL4B,CUL4A,PKP4,CDC23,INTS7,CDK2,CDC42,CDK11B,SH2B1,CDK1,CDK13,KANK2,CDK9,CDKN1B,BRCC3,PSMD6,CREBBP,TAOK3,CTNNB1,CRLF3,MAPK14,PSMD14,CSNK2A2,PSME3,DDB1,DDX3X,DAPK3,MAPKAPK2,TIPRL,DLG1,PSMF1,NUDT16,ROCK2,BRE,CDC73,FHL1,DYNC1LI1,NDRG1,PRMT5,RPS27L,STAG2,CTCF,H2AFX,MYBBP1A,RPRD1B,TAOK1,CHORDC1,MTA3,MRE11…
GO: Biological Process	GO:0048858	cell projection morphogenesis	4.689e-09	213	737	NRP1,NRP2,AK7,ACTG1,CEP41,TCTN3,AP2B1,AP2A2,AP2A1,ALCAM,ANK2,ANK3,APOE,WASL,RPS6KA4,ARL3,DCLK1,ARHGAP4,ARHGDIA,RHOG,RHOB,ARHGEF1,PICALM,BCL2,STK24,NCK2,DST,FZD1,C21orf2,CACNB3,OFD1,NUMB,CDH11,PTPN23,CDC42,SEPT7,CDK1,EVL,CHN1,ARHGEF11,CNP,COL1A1,CNTN1,AP2M1,CLU,CLTA,CLTC,CRMP1,ABI1,ACTR3,COL5A2,COL6A1,COL6A2,COL6A3,COL4A1,COL3A1,COL4A2,CTNNA1,WASF2,CTNNA2,PLXNC1,FLOT1,TRPV2,CSNK2A2,CSNK2B,VCAN,LRR…
GO: Biological Process	GO:0035966	response to topologically incorrect protein	5.566e-09	60	146	AARS,ACADVL,FBXO6,ADD1,ATP6V0D1,BAK1,BAX,CALR,UPF2,SERPINH1,DERL1,STT3B,CUL7,CLU,TPP1,HDAC6,DNAJB6,PDIA6,VAPB,DCTN1,TOR1A,GOSR2,EIF2S1,PDIA5,EXTL3,HSPH1,F12,DERL2,GFPT1,STUB1,HYOU1,SRPRB,HSPA8,HSP90AB1,DNAJA1,HSPA5,HSPA4,TOR1B,DNAJB1,LMNA,UPF3B,ERO1L,DNAJC3,ARFGAP1,C19orf10,PTPN1,SHC1,TLN1,SRPR,HSPA4L,SEC31A,WFS1,VCP,HSP90B1,ERP44,MANF,CXXC1,FAF2,UBXN4,SYVN1
GO: Biological Process	GO:0009060	aerobic respiration	5.605e-09	27	45	SUCLG1,SUCLA2,ACO2,ACO1,ADSL,CAT,CS,DLD,DLST,FH,ME3,IDH3G,IDH3B,IDH3A,IDH2,IDH1,MDH1,MDH2,OGDH,PDHB,OGDHL,SDHA,UQCRB,UQCRC2,UQCRC1,SIRT3,NNT
GO: Biological Process	GO:0038127	ERBB signaling pathway	5.752e-09	67	170	ADAM10,ADCY3,ADRBK1,AP2B1,AP2A2,AP2A1,AGT,AKT1,ARHGEF7,HGS,NCK2,CALM3,CBL,CDC42,CDK1,CDKN1B,AP2M1,CLTA,CLTC,CSK,EGFR,EFEMP1,PTK2B,FER,ERBB2,EPS8,EPS15,MTOR,GAB1,EPS15L1,SNX6,GRB2,RBPJ,ITPR2,ITPR1,KRAS,EPN1,MAP2K1,MAP2K2,MAPK3,MAPK1,PRKAR1A,PRKACG,PRKCA,PRKAR2A,PRKAR2B,PRKACB,PRKACA,KIF16B,PDPK1,PLCG1,PIK3C2A,PIK3CA,PIK3R1,ERBB2IP,THEM4,PTPN11,PTPRF,DAB2IP,SHC1,RPS27A,SRC,YWHAB,AFAP1L2,TSC2,STAM,A…
GO: Biological Process	GO:0031575	mitotic cell cycle G1/S transition checkpoint	5.791e-09	42	88	CRADD,ATM,CDK2,CDKN1B,PSMD6,PSMD14,PSME3,DLG1,PSMF1,RPS27L,NBN,PML,PSMC5,PSMC4,PSMD1,PSMC6,PSMD3,PSMD2,PSMB8,PSMB9,PSMC2,PSMC1,PSME1,PSME2,PSMD7,PSMD11,PSMD12,PSMB6,PSMB7,PSMB4,PSMB5,PSMB2,PSMB3,PSMA7,PSMB1,PSMA5,PSMA3,PSMA4,PSMA1,PURA,RPS27A,PSME4
GO: Biological Process	GO:0051351	positive regulation of ligase activity	5.791e-09	42	88	CDC16,CUL1,CDC23,CDK1,PSMD6,PSMD14,PSME3,PSMF1,ANAPC1,ANAPC4,PIN1,PSMC5,PSMC4,PSMD1,PSMC6,PSMD3,PSMD2,PSMB8,PSMB9,PSMC2,PSMC1,PSME1,PSME2,PSMD7,PSMD11,PSMD12,PSMB6,PSMB7,PSMB4,PSMB5,PSMB2,PSMB3,PSMA7,PSMB1,PSMA5,PSMA3,PSMA4,PSMA1,SKP1,RPS27A,XRCC4,PSME4
GO: Biological Process	GO:0043094	cellular metabolic compound salvage	6.182e-09	23	35	ADA,ADK,EIF2B2,EIF2B4,AMPD3,AMPD2,APRT,PDXK,CDA,GMPR2,DGUOK,TYMP,CECR1,EIF2B1,GOT1,GMPR,APIP,HPRT1,MTAP,ADI1,UPP1,MRI1,NAPRT1
GO: Biological Process	GO:2000145	regulation of cell motility	6.231e-09	146	467	AAMP,ABR,NRP1,NRP2,ACP5,ADAM10,ADA,AGT,AKT1,AIF1,AKT2,SPAG9,ANXA3,APOE,APEX1,ARHGAP5,ARHGAP4,SUN2,BCL2,STK24,C1QBP,C5,CAMK2D,IKBKAP,CALR,PRKD2,CDK6,CLIC4,AOC3,CD74,CCR1,COL1A1,HDAC6,CTSH,MAPK14,CSNK2B,DAPK3,DAB2,DAG1,SLC9A3R1,DIAPH1,MMRN2,ROCK2,ECM1,DPYSL3,DPEP1,PPM1F,EGFR,PTK2B,FGR,FER,FES,NISCH,CORO1A,GAB1,MIA3,GNB2L1,COL18A1,NCKAP1L,GNA13,HRG,HMOX1,SPATA13,IL6ST,ICAM1,RAP2C,JAK2,EPB41L5,ITGAV,…
GO: Biological Process	GO:0000245	spliceosomal complex assembly	6.268e-09	25	40	SRSF9,CRNKL1,DDX1,GEMIN6,SF3A3,TXNL4A,SF3A1,USP39,CELF2,PRPF19,PTBP2,MBNL1,SNRPG,SNRPD1,SNRPD2,SNRPE,SFSWAP,SRSF1,SRSF5,PRPF6,SRPK2,SF1,SNRNP200,SF3A2,DDX39B
GO: Biological Process	GO:0006903	vesicle targeting	6.268e-09	25	40	SNAP23,GBF1,ARCN1,CUL3,SEC16A,SEC24D,COPA,COPB1,COPB2,SEC24C,TMED10,TMED2,SEC24A,SEC23A,SAR1B,SEC24B,YKT6,COPE,SEPT5,ARFGAP1,TMED9,SEC13,COPG1,SEC31A,SCRIB
GO: Biological Process	GO:0045786	negative regulation of cell cycle	6.329e-09	149	479	FBXO6,CRADD,MBD4,AKT1,AK1,AKT2,CDC16,NAE1,BUB3,RHOB,ZW10,ATM,SART1,TRRAP,SMC1A,BCL2,DST,CALR,CUL4A,CUL3,CUL2,CUL1,PNPT1,CDC23,INTS7,CDK2,CDK6,CDK1,CDK9,CDKN1B,BRCC3,PSMD6,MFN2,TAOK3,CRLF3,MAPK14,PSMD14,CSNK2A2,PSME3,DDB1,TBRG4,MAPKAPK2,TIPRL,DLG1,PSMF1,CAB39,BRE,EIF4G2,CDC73,EGFR,FHL1,DYNC1LI1,NDRG1,RPS27L,HDAC2,KHDRBS1,H2AFX,MYBBP1A,PDCD4,HTRA2,ILK,TAOK1,SMAD3,CAB39L,MRE11A,MSH2,INTS3,MEN1,MCM4,…
GO: Biological Process	GO:0046129	purine ribonucleoside biosynthetic process	6.808e-09	47	104	ACACA,ADA,ADK,ADSL,ADSS,ADSSL1,AK2,AK1,ALDOA,GMPS,PAPSS2,PAPSS1,APRT,ATP1A3,ATP1A1,ATP1A2,ATP5C1,ATP5A1,ATP2B4,ATP2A3,ATP2A2,ATP2B1,ATP1B1,ATP5J,PPCDC,SLC25A13,CECR1,COASY,GBAS,GUK1,ATP5L,AK3,HPRT1,MAT2B,IMPDH2,IMPDH1,MTAP,MAT2A,NT5E,NME7,NME2,NME3,PRPS1,RP2,PRPS2,PID1,PANK4
GO: Biological Process	GO:0042451	purine nucleoside biosynthetic process	6.808e-09	47	104	ACACA,ADA,ADK,ADSL,ADSS,ADSSL1,AK2,AK1,ALDOA,GMPS,PAPSS2,PAPSS1,APRT,ATP1A3,ATP1A1,ATP1A2,ATP5C1,ATP5A1,ATP2B4,ATP2A3,ATP2A2,ATP2B1,ATP1B1,ATP5J,PPCDC,SLC25A13,CECR1,COASY,GBAS,GUK1,ATP5L,AK3,HPRT1,MAT2B,IMPDH2,IMPDH1,MTAP,MAT2A,NT5E,NME7,NME2,NME3,PRPS1,RP2,PRPS2,PID1,PANK4
GO: Biological Process	GO:0000904	cell morphogenesis involved in differentiation	6.936e-09	218	761	NRP1,NRP2,ACTG1,AP2B1,AP2A2,AP2A1,ALCAM,ANK2,ANK3,APOE,WASL,PLOD3,RPS6KA4,DCLK1,ARHGAP4,ARHGDIA,RHOG,RHOB,ARHGEF1,PICALM,BCL2,STK24,NCK2,DST,FZD1,C1QBP,CALR,CACNB3,CUL3,NUMB,CDH11,CLIC4,CDC42,CDK1,EVL,C22orf28,CHN1,ARHGEF11,CNP,COL1A1,CNTN1,AP2M1,CLTA,CLTC,CRMP1,ARPC2,ACTR3,COL5A2,COL6A1,COL6A2,COL6A3,COL4A1,COL3A1,COL4A2,CTNNA1,CTNNB1,CTNNA2,TRIM28,PLXNC1,FLOT1,TRPV2,CSNK2A2,CSNK2B,VCAN,LRRK2,DA…
GO: Biological Process	GO:0006487	protein N-linked glycosylation	7.255e-09	46	101	DPM1,CANX,CALR,MLEC,STT3B,SEC24D,ALG12,ALG3,DDOST,DAD1,ALG9,SEC24C,MAN1A2,SEC24A,MAN1B1,FUT8,SEC23A,SAR1B,SEC24B,GFPT1,PDIA3,STT3A,LMAN1,MAN1A1,MAN2A1,MGAT1,MPI,UGGT1,ALG5,GMPPB,GMPPA,GNPNAT1,PRKCSH,PGM3,PMM2,MCFD2,SERPINA1,SEC13,RPN2,RPN1,ALG2,SEC31A,VCP,MOGS,GANAB,SYVN1
GO: Biological Process	GO:0002504	antigen processing and presentation of peptide or polysaccharide antigen via MHC class II	7.692e-09	45	98	AP1M1,AP1S2,AP2B1,AP1B1,AP2A2,AP2A1,AP1G1,CANX,CD74,SEC24D,AP2M1,CLTA,CLTC,CTSS,CTSD,ACTR1A,ACTR1B,CTSL1,DCTN1,DYNC1H1,DYNC1LI2,DYNC1I2,KIF3B,DNM2,SEC24C,SEC24A,KIF3A,DCTN4,SEC23A,SAR1B,SEC24B,DCTN2,HLA-DRA,HLA-DPA1,KLC1,KIF2A,KIF5A,PYCARD,LGMN,SEC13,THBS1,SPTBN2,SEC31A,KIFAP3,OSBPL1A
GO: Biological Process	GO:0044106	cellular amine metabolic process	8.337e-09	76	203	KYNU,APOA4,APOA2,ALDH7A1,BHMT,KMO,CCBL1,PLA2G4C,CETP,PSMD6,COMT,PSMD14,PSME3,NQO1,PCYT1B,PSMF1,SPTLC2,ACSL3,PNPLA6,FABP5,PLBD1,LPCAT1,GOT1,APIP,GCDH,HPRT1,ENPP6,SLC27A1,SAT2,MTAP,MAOB,MECP2,PEBP1,SLC44A2,PON1,ENPP2,SMPD4,PCYT1A,PAOX,PSMC5,PSMC4,PSMD1,PSMC6,PSMD3,PSMD2,PSMB8,PSMB9,PSMC2,PSMC1,PSME1,PSME2,PSMD7,PSMD11,PSMD12,PSMB6,PSMB7,PSMB4,PSMB5,PSMB2,PSMB3,PSMA7,PSMB1,PSMA5,PSMA3,PSMA4,PSMA1,CC…
GO: Biological Process	GO:0071779	G1/S transition checkpoint	8.494e-09	43	92	CRADD,AKT1,ATM,CDK2,CDKN1B,PSMD6,PSMD14,PSME3,DLG1,PSMF1,RPS27L,NBN,PML,PSMC5,PSMC4,PSMD1,PSMC6,PSMD3,PSMD2,PSMB8,PSMB9,PSMC2,PSMC1,PSME1,PSME2,PSMD7,PSMD11,PSMD12,PSMB6,PSMB7,PSMB4,PSMB5,PSMB2,PSMB3,PSMA7,PSMB1,PSMA5,PSMA3,PSMA4,PSMA1,PURA,RPS27A,PSME4
GO: Biological Process	GO:0016052	carbohydrate catabolic process	8.501e-09	59	144	AGL,ALDOC,ALDOA,PGLS,CALM3,CTBS,H6PD,NCOR1,ENO2,FBP1,G6PD,FUT8,NUDT5,GAA,HIBADH,GLB1,GM2A,AKR1A1,GALT,GALE,GALK1,GYG1,GPD2,GPI,HK2,HK1,HK3,HEXB,DHDH,LDHA,MIF,LDHAL6A,OGDH,ADPGK,NAGA,PPP1CA,ABHD10,RBKS,PRKAG1,PRKAA1,PGD,PGAM1,PGM5,PGM1,PFKM,PFKP,PFKL,PDHB,PHKA1,OGDHL,PYGB,PYGL,PYGM,SORD,TKT,PGM2,TALDO1,GLYR1,PGM2L1
GO: Biological Process	GO:0032272	negative regulation of protein polymerization	8.609e-09	29	51	ADD1,CAPG,CAPZA1,CAPZA2,CAPZB,EVL,FKBP4,TRIOBP,ARFGEF1,GSN,SPTBN4,STMN1,MTPN,TMOD3,PFN2,PFN1,RDX,TWF1,TBCD,SPTB,SPTBN1,SPTA1,SPTAN1,SPTBN2,SCIN,MAPRE1,VDAC2,TPM1,KANK1
GO: Biological Process	GO:0007173	epidermal growth factor receptor signaling pathway	8.666e-09	66	168	ADAM10,ADCY3,ADRBK1,AP2B1,AP2A2,AP2A1,AGT,AKT1,ARHGEF7,HGS,NCK2,CALM3,CBL,CDC42,CDK1,CDKN1B,AP2M1,CLTA,CLTC,CSK,EGFR,EFEMP1,PTK2B,FER,ERBB2,EPS8,EPS15,MTOR,GAB1,EPS15L1,SNX6,GRB2,ITPR2,ITPR1,KRAS,EPN1,MAP2K1,MAP2K2,MAPK3,MAPK1,PRKAR1A,PRKACG,PRKCA,PRKAR2A,PRKAR2B,PRKACB,PRKACA,KIF16B,PDPK1,PLCG1,PIK3C2A,PIK3CA,PIK3R1,ERBB2IP,THEM4,PTPN11,PTPRF,DAB2IP,SHC1,RPS27A,SRC,YWHAB,AFAP1L2,TSC2,STAM,AKT1S1
GO: Biological Process	GO:0007409	axonogenesis	9.47e-09	169	562	NRP1,NRP2,ACTG1,AP2B1,AP2A2,AP2A1,ALCAM,ANK2,ANK3,APOE,WASL,RPS6KA4,DCLK1,ARHGAP4,ARHGDIA,RHOG,RHOB,ARHGEF1,PICALM,BCL2,STK24,NCK2,DST,FZD1,CACNB3,NUMB,CDH11,CDC42,CDK1,EVL,CHN1,ARHGEF11,CNP,COL1A1,CNTN1,AP2M1,CLTA,CLTC,CRMP1,COL5A2,COL6A1,COL6A2,COL6A3,COL4A1,COL3A1,COL4A2,CTNNA1,CTNNA2,PLXNC1,FLOT1,TRPV2,CSNK2A2,CSNK2B,VCAN,DLG1,MYH14,ROCK2,DPYSL3,DPYSL2,DOCK1,EGFR,STIP1,AFG3L2,FES,ERBB2,EPHB3,…
GO: Biological Process	GO:0008286	insulin receptor signaling pathway	1.153e-08	68	176	AKT1,AHSG,AKT2,ATP6V0D1,ATP6V1B1,ATP6V1B2,ATP6V0C,ATP6V0A1,ATP6V1E1,ATP6V1C1,CDK1,ATP6V1H,CRK,ATP6V1D,INPP5K,CAB39,EIF4B,EIF4G1,FER,MTOR,GAB1,BAIAP2,TCIRG1,SORBS1,GRB2,GRB14,IDE,INPPL1,CAB39L,KRAS,YBX1,EEF2K,PPM1A,MAP2K1,MAP2K2,MAPK3,MAPK1,PRKAG1,PRKCA,PRKCB,PRKAA1,PRKAB2,PRKAB1,ENPP1,PDPK1,PIK3C2A,PIK3CA,PIK3C3,PIK3R1,RELA,RHEB,THEM4,PTPN1,PTPN11,PTPRE,PTPRA,PTPRF,SMARCC1,SRSF3,SHC1,PID1,PHIP,SR…
GO: Biological Process	GO:0030835	negative regulation of actin filament depolymerization	1.26e-08	21	31	ADD1,CAPG,CAPZA1,CAPZA2,CAPZB,EVL,LIMA1,TRIOBP,GSN,SPTBN4,MTPN,TMOD3,RDX,TWF1,SPTB,SPTBN1,SPTA1,SPTAN1,SPTBN2,SCIN,TPM1
GO: Biological Process	GO:0060627	regulation of vesicle-mediated transport	1.324e-08	93	267	ABR,NRP1,NAPA,SNAP23,ACTN4,ADD1,MTMR2,AHSG,BIN1,ANXA1,ANXA2,APOC3,APOC2,WASL,ARF6,ARRB2,PICALM,CALR,CBL,CAV1,CD14,ZFYVE16,SNX17,UNC13D,CSK,DAB2,RAB9A,RAB3D,DOCK2,ACSL3,FGR,FES,RUFY1,PACSIN2,KIF3A,LYPLA1,SERPINA10,GNB2L1,HCK,NCKAP1L,HMOX1,HNRNPK,HIP1,LYPLAL1,IGHM,ZP4,ITGAV,LYN,NSF,MYH9,MYO5A,NCAM1,GOPC,SEPT5,MAP2K1,MAP2K2,PRKD1,MAPK3,MAPK1,PRKCA,PRKAA1,PPT1,PFN2,PDPK1,SCYL2,PLD2,EXOC2,PYCARD,RALB,…
GO: Biological Process	GO:0030865	cortical cytoskeleton organization	1.343e-08	17	22	ACTN1,ARF6,FMNL1,CALR,DLG1,EPB41,EPB41L2,TRPV4,NCKAP1L,SYNPO,LLGL1,PLEK,CORO1C,TLN1,STRIP1,EHD2,EPB41L3
GO: Biological Process	GO:0009156	ribonucleoside monophosphate biosynthetic process	1.384e-08	23	36	ADA,ADK,ADSL,ADSS,ADSSL1,GMPS,AMPD3,AMPD2,APRT,ATIC,CECR1,DPYD,GART,PAICS,HPRT1,IMPDH2,IMPDH1,PPAT,PRPS1,PFAS,PRPS2,UPP1,UMPS
GO: Biological Process	GO:0048812	neuron projection morphogenesis	1.389e-08	184	626	NRP1,NRP2,ACTG1,AP2B1,AP2A2,AP2A1,ALCAM,ANK2,ANK3,APOE,WASL,RPS6KA4,DCLK1,ARHGAP4,ARHGDIA,RHOG,RHOB,ARHGEF1,PICALM,BCL2,STK24,NCK2,DST,FZD1,CACNB3,NUMB,CDH11,CDC42,CDK1,EVL,CHN1,ARHGEF11,CNP,COL1A1,CNTN1,AP2M1,CLU,CLTA,CLTC,CRMP1,ACTR3,COL5A2,COL6A1,COL6A2,COL6A3,COL4A1,COL3A1,COL4A2,CTNNA1,CTNNA2,PLXNC1,FLOT1,TRPV2,CSNK2A2,CSNK2B,VCAN,LRRK2,DLG1,MYH14,DMD,ROCK2,DPYSL3,DPYSL2,DOCK1,EGFR,STIP1,AFG…
GO: Biological Process	GO:0051693	actin filament capping	1.759e-08	20	29	ADD1,CAPG,CAPZA1,CAPZA2,CAPZB,EVL,TRIOBP,GSN,SPTBN4,MTPN,TMOD3,RDX,TWF1,SPTB,SPTBN1,SPTA1,SPTAN1,SPTBN2,SCIN,TPM1
GO: Biological Process	GO:0002495	antigen processing and presentation of peptide antigen via MHC class II	1.779e-08	44	97	AP1M1,AP1S2,AP2B1,AP1B1,AP2A2,AP2A1,AP1G1,CANX,CD74,SEC24D,AP2M1,CLTA,CLTC,CTSS,CTSD,ACTR1A,ACTR1B,CTSL1,DCTN1,DYNC1H1,DYNC1LI2,DYNC1I2,KIF3B,DNM2,SEC24C,SEC24A,KIF3A,DCTN4,SEC23A,SAR1B,SEC24B,DCTN2,HLA-DRA,HLA-DPA1,KLC1,KIF2A,KIF5A,PYCARD,LGMN,SEC13,SPTBN2,SEC31A,KIFAP3,OSBPL1A
GO: Biological Process	GO:0019886	antigen processing and presentation of exogenous peptide antigen via MHC class II	1.891e-08	43	94	AP1M1,AP1S2,AP2B1,AP1B1,AP2A2,AP2A1,AP1G1,CANX,CD74,SEC24D,AP2M1,CLTA,CLTC,CTSS,CTSD,ACTR1A,ACTR1B,CTSL1,DCTN1,DYNC1H1,DYNC1LI2,DYNC1I2,KIF3B,DNM2,SEC24C,SEC24A,KIF3A,DCTN4,SEC23A,SAR1B,SEC24B,DCTN2,HLA-DRA,HLA-DPA1,KLC1,KIF2A,KIF5A,LGMN,SEC13,SPTBN2,SEC31A,KIFAP3,OSBPL1A
GO: Biological Process	GO:0072329	monocarboxylic acid catabolic process	1.891e-08	43	94	ACAA1,ACADM,ACADS,ACADL,ACADVL,ACOX1,AKT1,ABCD1,AKT2,ACOX3,ALDH4A1,ACSL5,CPT1A,CRAT,CPT2,ECI1,DBI,DECR1,ECH1,SLC27A4,ETFDH,FAAH,MTOR,ECI2,ACAA2,GOT2,AKR1A1,HADHB,HADH,HADHA,HSD17B4,ACOT7,MUT,PCCB,PCCA,ABCD3,PEX5,PLA2G15,AMACR,SCP2,MLYCD,ALDH5A1,LPIN1
GO: Biological Process	GO:0007044	cell-substrate junction assembly	2.119e-08	32	61	ACTN1,ACTN2,ARHGAP6,BCL2,PIP5K1A,DST,ROCK2,PPM1F,PTK2B,FN1,SORBS1,HRG,EPB41L5,ITGAV,ITGA5,ITGA6,SMAD3,LAMC1,LAMC2,LAMA3,KRT5,MMP14,PDPK1,PLEC,ROCK1,PTK2,THY1,THBS1,TLN1,TNS1,SRC,TRIP6
GO: Biological Process	GO:0034976	response to endoplasmic reticulum stress	2.229e-08	50	117	AARS,ACADVL,ADD1,AIFM1,ATP6V0D1,BAK1,BAX,BCL2,CALR,DERL1,CUL7,TPP1,COL4A3BP,PDIA6,VAPB,DCTN1,GOSR2,EIF2S1,PDIA5,OS9,EXTL3,DERL2,GFPT1,UBE4B,HYOU1,SRPRB,HSPA5,UBE2K,ITPR1,LMNA,ERO1L,CCDC47,DNAJC3,ARFGAP1,C19orf10,PTPN1,DAB2IP,DNAJC10,SEL1L,SHC1,FAM129A,TLN1,SRPR,SEC31A,WFS1,VCP,HSP90B1,CXXC1,BAG6,SYVN1
GO: Biological Process	GO:0046578	regulation of Ras protein signal transduction	2.368e-08	106	319	ARFGAP3,ABCA1,ABR,GBF1,SQSTM1,ARHGEF7,ALDH1A1,AKT2,APOE,APOC3,ARF6,ARRB1,ARHGAP5,ARHGAP4,RHOG,ARHGEF2,ARHGEF1,PIP5K1A,CAMK2D,TBC1D10B,CUL3,PKP4,TBC1D5,DOCK4,CHN1,ACAP1,ARHGEF11,GIT2,TBC1D4,IQSEC1,MFN2,CRK,FARP1,FLOT1,CYTH1,TBC1D17,ARHGEF6,DOCK2,ARHGEF10,FBP1,PTK2B,ITSN2,ERBB2,EPHB3,MTOR,AKAP13,FGD3,ADAP1,VAV3,CDC42EP2,NCKAP1L,AGRN,ARFGEF2,ARFGEF1,ASAP1,ARHGAP35,AGFG1,SPATA13,PREX1,LLGL1,KRAS,SMAP…
GO: Biological Process	GO:0007169	transmembrane receptor protein tyrosine kinase signaling pathway	2.577e-08	193	668	ABR,NRP1,NRP2,ADAM10,ADCY3,ADRBK1,AP2B1,AP2A2,AP2A1,AGT,AKT1,SGPL1,SQSTM1,ARHGEF7,AHSG,AKT2,DOK2,MYOF,AATF,ARHGAP4,ARHGDIA,ARHGEF2,FIBP,HGS,ARHGEF1,ATP6V0D1,ATP6V1B1,ATP6V1B2,ATP6V0C,ATP6V0A1,ATP6V1E1,ATP6V1C1,NCK2,CALM3,CBL,GIGYF2,PRKD2,CDC42,CDK1,CHN1,ARHGEF11,CDKN1B,RAB14,ATP6V1H,AP2M1,CLTA,CLTC,ABI1,CRK,CTNNB1,ATP6V1D,MAPK14,CSPG4,CSK,MAPKAPK2,SLC9A3R1,MMRN2,ARHGEF6,INPP5K,CAB39,DUSP3,EIF4B,E…
GO: Biological Process	GO:1901566	organonitrogen compound biosynthetic process	2.66e-08	198	689	SUCLA2,ABCA1,ACACA,ADA,ADCY3,KYNU,ADK,ADSL,ADSS,ADSSL1,AK2,SGPL1,AK1,EIF2B2,EIF2B4,B3GAT3,PHGDH,ALAD,ALDOA,GMPS,AMPD3,PAPSS2,PAPSS1,AMPD2,NFS1,APOA2,APOE,APRT,ASL,ATP1A3,ATP1A1,ATP1A2,ATIC,ATP5C1,ALDH7A1,ATP5A1,ATP2B4,ATP2A3,ATP2A2,ATP2B1,ATP1B1,ATP5J,BHMT,BGN,BCAT2,KMO,GLCE,DEGS1,CCBL1,PPCDC,MRPS35,ALDH4A1,MTHFD1L,CDA,CPOX,GMPR2,COL4A3BP,ABCB6,SLC25A13,CTPS1,GGCT,VCAN,CSPG4,DCN,DCTD,VAPB,QTRTD1,…
GO: Biological Process	GO:0044724	single-organism carbohydrate catabolic process	2.673e-08	57	141	AGL,ALDOC,ALDOA,PGLS,CALM3,CTBS,H6PD,NCOR1,ENO2,FBP1,G6PD,FUT8,NUDT5,GAA,HIBADH,GLB1,GM2A,AKR1A1,GALT,GALE,GALK1,GYG1,GPD2,GPI,HK2,HK1,HK3,HEXB,DHDH,LDHA,MIF,LDHAL6A,OGDH,ADPGK,PPP1CA,ABHD10,RBKS,PRKAG1,PRKAA1,PGD,PGAM1,PGM5,PGM1,PFKM,PFKP,PFKL,PDHB,PHKA1,OGDHL,PYGB,PYGL,PYGM,SORD,TKT,PGM2,TALDO1,GLYR1
GO: Biological Process	GO:0001932	regulation of protein phosphorylation	2.854e-08	244	883	IQGAP1,NRP1,ACADVL,RIPK1,ADAR,ADCY3,ADD1,ADRBK2,AGT,AKT1,SQSTM1,AIF1,AKT2,SPAG9,APOE,ARAF,RPS6KA4,ARRB1,ARRB2,ATP6V0D1,BAK1,BAX,BCL2,NCK2,FZD1,C5,CALR,CAV1,SPDYA,LAMTOR3,PRKD2,CDC42,CDK1,CD81,CD74,CD44,CHI3L1,PTPLAD1,CDKN1B,CUL7,CCR1,TPP1,ABI1,CRK,RAD50,TAOK3,PDIA6,MAPK14,CSNK2B,CSPG4,CSK,VAPB,DCTN1,LRRK2,MAPKAPK2,DAB2,SLC9A3R1,DLG1,INPP5K,CAB39,DUSP9,DUSP3,GOSR2,PPM1F,EGFR,EIF2S1,PTK2B,ACSL1,FEC…
GO: Biological Process	GO:2000602	regulation of interphase of mitotic cell cycle	2.951e-08	65	169	CRADD,AIF1,NAE1,APEX1,ATM,BID,CAMK2D,CUL4B,CUL4A,CDK2,CDK1,KANK2,CDKN1B,PSMD6,CRLF3,PSMD14,PSME3,DDX3X,DLG1,PSMF1,CDC73,FHL1,RPS27L,MTA3,NBN,PML,PSMC5,PSMC4,PSMD1,PSMC6,PSMD3,PSMD2,PSMB8,PSMB9,PSMC2,PSMC1,PSME1,PSME2,PSMD7,PSMD11,PSMD12,PSMB6,PSMB7,PSMB4,PSMB5,PSMB2,PSMB3,PSMA7,PSMB1,PSMA5,PSMA3,PSMA4,PSMA1,PTPN6,PURA,SMARCA4,PAF1,RPS27A,PID1,USP47,TOP2A,TOP2B,UBE2L3,BRD4,PSME4
GO: Biological Process	GO:0051338	regulation of transferase activity	3.127e-08	202	707	IQGAP1,ACADVL,RIPK1,ADAR,ADCY3,ADD1,AGT,AKT1,SPAG9,APOE,ARAF,ARRB1,ATP6V0D1,NCK2,C5,CALR,CAV1,SPDYA,LAMTOR3,POT1,CDC42,CDK1,CD81,CD74,CHI3L1,PTPLAD1,CDKN1B,CUL7,CCR1,TPP1,ABI1,CRK,RAD50,TAOK3,PDIA6,MAPK14,CSNK2B,CSPG4,CSK,VAPB,DCTN1,LRRK2,MAPKAPK2,DAB2,SLC9A3R1,DLG1,INPP5K,CAB39,DUSP9,DUSP3,GOSR2,PPM1F,EGFR,EIF2S1,PTK2B,ACSL1,PDIA5,FGR,PRDX3,CDK5RAP3,MALT1,ERBB2,CLN8,EXTL3,PDCD10,CHP1,MTOR,AKAP13…
GO: Biological Process	GO:0010951	negative regulation of endopeptidase activity	3.179e-08	58	145	SERPINA3,AGT,AKT1,AKT2,ARRB1,SERPINC1,USP14,PRDX5,RECK,SERPING1,CAST,SERPINA6,SERPINH1,CD44,DNAJB6,CSTB,UCHL5,CRYAB,DDX3X,PSMF1,DPEP1,SERPINB1,PRDX3,SERPINA10,SERPIND1,HTT,GPX1,GPI,HRG,IGBP1,IFI16,ITIH3,ITIH2,ITIH4,BIRC6,LXN,PAK2,SERPINA5,MICAL1,POR,SERPINF1,SERPINF2,PCID2,SERPINA1,SERPINA4,SERPINB6,SERPINB8,SERPINE2,SERPINB10,SERPINB9,RENBP,RPS6KA1,RPS6KA3,THBS1,USP47,TNFAIP3,SERPINA7,SRC
GO: Biological Process	GO:0006890	retrograde vesicle-mediated transport, Golgi to ER	3.223e-08	18	25	GBF1,ARCN1,COG4,COPA,COPB1,COPB2,TMED10,RER1,HTT,COPE,COPG2,SCYL1,COG3,COG7,ARFGAP1,RAB6A,COPG1,SCFD1
GO: Biological Process	GO:0051648	vesicle localization	3.449e-08	39	83	VPS33B,SNAP23,GBF1,ARCN1,WASL,CUL3,SEC16A,SEC24D,COPA,COPB1,RAB11B,COPB2,KIF3B,SEC24C,TMED10,TMED2,SEC24A,KIF3A,SEC23A,SAR1B,SEC24B,HTT,YKT6,KIF5B,COPE,MYO5A,SEPT5,MAP2K1,ARFGAP1,KIF13A,RAB27A,TMED9,SEC13,FNBP1L,BBS7,COPG1,SEC31A,KIFAP3,SCRIB
GO: Biological Process	GO:0071156	regulation of cell cycle arrest	3.468e-08	96	283	FBXO6,CRADD,MBD4,AKT1,AKT2,CDC16,NAE1,BUB3,ZW10,ATM,TRRAP,SMC1A,CDC23,INTS7,CDK2,CDK1,CDK9,CDKN1B,BRCC3,PSMD6,TAOK3,CRLF3,MAPK14,PSMD14,CSNK2A2,PSME3,DDB1,MAPKAPK2,TIPRL,DLG1,PSMF1,BRE,DYNC1LI1,NDRG1,RPS27L,H2AFX,MYBBP1A,TAOK1,MRE11A,MSH2,INTS3,MCM4,MCM3,MCM6,MCM5,MCM2,MCM7,MIF,ORC4,ANAPC1,ORC2,NBN,ANAPC4,PRKACA,PML,PCID2,RFC2,RFC5,RFC4,PSMC5,PSMC4,PSMD1,PSMC6,PSMD3,PSMD2,PSMB8,PSMB9,PSMC2,PSMC1,…
GO: Biological Process	GO:0051438	regulation of ubiquitin-protein ligase activity	3.774e-08	44	99	CDC16,BUB3,CUL1,CDC23,CDK2,CDK1,PSMD6,PSMD14,PSME3,PSMF1,BAG5,ANAPC1,ANAPC4,PIN1,PSMC5,PSMC4,PSMD1,PSMC6,PSMD3,PSMD2,PSMB8,PSMB9,PSMC2,PSMC1,PSME1,PSME2,PSMD7,PSMD11,PSMD12,PSMB6,PSMB7,PSMB4,PSMB5,PSMB2,PSMB3,PSMA7,PSMB1,PSMA5,PSMA3,PSMA4,PSMA1,SKP1,RPS27A,PSME4
GO: Biological Process	GO:0009108	coenzyme biosynthetic process	3.796e-08	48	112	ACACA,KYNU,NFS1,ATIC,PDXK,KMO,PPCDC,MTHFD1L,ACSL5,DBT,DLD,FASN,ACSL3,ACSL1,ACSL4,COASY,FLAD1,G6PD,GART,COQ6,GPHN,GCDH,MAT2B,NADKD1,TPK1,MTHFD1,MAT2A,COQ9,PCBD1,PDHB,PDK3,PDK2,ACSS2,QDPR,SLC25A1,PDP1,PANK4,PNPO,SPR,PDPR,ACSS1,ACSL6,MLYCD,PDHX,QPRT,HAAO,COQ5,NAPRT1
GO: Biological Process	GO:0009124	nucleoside monophosphate biosynthetic process	3.971e-08	24	40	ADA,ADK,ADSL,ADSS,ADSSL1,GMPS,AMPD3,AMPD2,APRT,ATIC,DUT,CECR1,DPYD,GART,PAICS,HPRT1,IMPDH2,IMPDH1,PPAT,PRPS1,PFAS,PRPS2,UPP1,UMPS
GO: Biological Process	GO:0006986	response to unfolded protein	4.063e-08	56	139	AARS,ACADVL,FBXO6,ADD1,ATP6V0D1,BAK1,BAX,CALR,UPF2,SERPINH1,DERL1,STT3B,CUL7,TPP1,DNAJB6,PDIA6,VAPB,DCTN1,TOR1A,GOSR2,EIF2S1,PDIA5,EXTL3,HSPH1,DERL2,GFPT1,HYOU1,SRPRB,HSPA8,HSP90AB1,DNAJA1,HSPA5,HSPA4,TOR1B,DNAJB1,LMNA,UPF3B,ERO1L,DNAJC3,ARFGAP1,C19orf10,PTPN1,SHC1,TLN1,SRPR,HSPA4L,SEC31A,WFS1,VCP,HSP90B1,ERP44,MANF,CXXC1,FAF2,UBXN4,SYVN1
GO: Biological Process	GO:0031398	positive regulation of protein ubiquitination	4.063e-08	56	139	FBXO4,CDC16,ARRB1,ARRB2,CUL1,CDC23,CDK1,PSMD6,CLU,PSMD14,PSME3,LRRK2,PSMF1,PTK2B,MALT1,STUB1,HSPA5,ANAPC1,ANAPC4,PIN1,PSMC5,PSMC4,PSMD1,PSMC6,PSMD3,PSMD2,PSMB8,PSMB9,PSMC2,PSMC1,PSME1,PSME2,PSMD7,PSMD11,PSMD12,PTK2,NDNL2,PSMB6,PSMB7,PSMB4,PSMB5,PSMB2,PSMB3,PSMA7,PSMB1,PSMA5,PSMA3,PSMA4,PSMA1,SKP1,HSPBP1,RPS27A,TSPYL5,WFS1,AIMP2,PSME4
GO: Biological Process	GO:0009081	branched-chain amino acid metabolic process	4.176e-08	17	23	HIBCH,ACAT1,ACADSB,BCAT2,BCKDHB,DBT,DLD,HIBADH,BCKDK,HSD17B10,HMGCL,IVD,ACAD8,ALDH6A1,MCCC1,MCCC2,STAT5A
GO: Biological Process	GO:0048011	neurotrophin TRK receptor signaling pathway	4.204e-08	81	228	ABR,ADCY3,ADRBK1,AP2B1,AP2A2,AP2A1,AGT,AKT1,SQSTM1,ARHGEF7,AATF,ARHGAP4,ARHGDIA,ARHGEF2,ARHGEF1,CALM3,CDK1,ARHGEF11,CDKN1B,AP2M1,CLTA,CLTC,CRK,MAPK14,MAPKAPK2,ARHGEF6,DUSP3,MTOR,AKAP13,FGD3,VAV3,HDAC2,GRB2,RAPGEF1,ITPR2,ITPR1,PREX1,KIDINS220,KRAS,RTN4,NFKB1,MAP2K1,MAP2K2,MAPK13,MAPK3,MAPK1,PRKAR1A,PRKACG,PRKCA,PRKAR2A,PRKAR2B,PRKACB,PRKACA,PPP2R5D,PDPK1,PLCG1,PIK3CA,PIK3R1,RELA,RAP1A,RALB,RALA,TH…
GO: Biological Process	GO:0018208	peptidyl-proline modification	4.274e-08	20	30	P4HA2,FKBP10,FKBP7,PPIF,PPIG,FKBP4,FKBP5,FKBP3,FKBP2,PPIE,CRTAP,PPIH,FKBP9,P4HA1,P4HB,PPIB,PIN1,NTMT1,FKBP8,EGLN1
GO: Biological Process	GO:0008652	cellular amino acid biosynthetic process	4.804e-08	49	116	EIF2B2,EIF2B4,PHGDH,ASL,ATIC,ALDH7A1,BHMT,BCAT2,CCBL1,ALDH4A1,MTHFD1L,GGCT,UPB1,DPYD,EIF2B1,PADI2,THNSL1,GLS,GCLC,GOT2,GOT1,APIP,GLUL,GART,GAMT,GATM,HAGH,GSS,MAT2B,SLC27A1,MTHFD1,MTHFR,MTAP,MTR,MAT2A,MGST2,MGST3,OAT,CNDP2,SRR,ALDH18A1,SLC1A3,SHMT1,SHMT2,PADI4,THNSL2,ADI1,SEPHS2,MRI1
GO: Biological Process	GO:0006458	'de novo' protein folding	4.889e-08	29	54	CCT6A,CD74,TOR1A,HSPH1,HSPA14,TUBA1B,TUBB4B,TUBB3,SH3GLB1,CCT8,CCT4,CCT2,HSPA8,TOR1B,TOR2A,DNAJB1,DNAJC2,TUBB2B,UGGT1,ERO1L,TOR3A,TBCE,TBCD,TBCC,CCT5,TUBB6,TUBB2A,TUBA4A,CCT3
GO: Biological Process	GO:0051017	actin filament bundle assembly	4.928e-08	40	87	ACTN1,ACTN4,ACTN2,ADD1,AIF1,ARRB1,ARHGAP6,CALD1,CUL3,CDC42,KANK2,LIMA1,SORBS3,INPP5K,ROCK2,DPYSL3,ARHGEF10,PPM1F,PTK2B,EPS8,MTOR,BAIAP2,SORBS1,SYNPO,SMAD3,LCP1,MYO1B,PAWR,PAK1,KANK3,NF2,PFN1,SERPINF2,PLEK,FHOD1,ROCK1,ARAP1,FSCN1,EZR,TPM1
GO: Biological Process	GO:0051340	regulation of ligase activity	4.992e-08	45	103	CDC16,BUB3,CUL1,CDC23,CDK2,CDK1,PSMD6,PSMD14,PSME3,PSMF1,BAG5,ANAPC1,ANAPC4,PIN1,PSMC5,PSMC4,PSMD1,PSMC6,PSMD3,PSMD2,PSMB8,PSMB9,PSMC2,PSMC1,PSME1,PSME2,PSMD7,PSMD11,PSMD12,PSMB6,PSMB7,PSMB4,PSMB5,PSMB2,PSMB3,PSMA7,PSMB1,PSMA5,PSMA3,PSMA4,PSMA1,SKP1,RPS27A,XRCC4,PSME4
GO: Biological Process	GO:0043549	regulation of kinase activity	5.023e-08	196	686	IQGAP1,ACADVL,RIPK1,ADAR,ADCY3,ADD1,AGT,AKT1,SPAG9,APOE,ARAF,ARRB1,ATP6V0D1,NCK2,C5,CALR,CAV1,SPDYA,LAMTOR3,CDC42,CDK1,CD81,CD74,CHI3L1,PTPLAD1,CDKN1B,CUL7,CCR1,TPP1,ABI1,CRK,RAD50,TAOK3,PDIA6,MAPK14,CSNK2B,CSPG4,CSK,VAPB,DCTN1,LRRK2,MAPKAPK2,DAB2,SLC9A3R1,DLG1,INPP5K,CAB39,DUSP9,DUSP3,GOSR2,PPM1F,EGFR,EIF2S1,PTK2B,ACSL1,PDIA5,FGR,PRDX3,CDK5RAP3,MALT1,ERBB2,EXTL3,PDCD10,CHP1,MTOR,AKAP13,MAP4K5,CD…
GO: Biological Process	GO:0045333	cellular respiration	5.048e-08	63	164	SUCLG1,SUCLA2,ACO2,ACO1,ADSL,ATP5C1,ATP5A1,ATP5J,BAX,CAT,PNPT1,SLC25A12,COX6B1,COX4I1,SLC25A13,CS,TBRG4,CYC1,COX5A,DLD,DLST,FH,ME3,ETFDH,ETFB,ETFA,NDUFA13,ATP5L,MYBBP1A,IDH3G,IDH3B,IDH3A,IDH2,IDH1,MAT2A,MECP2,MDH1,MDH2,OGDH,NDUFA8,NDUFA10,NDUFB5,NDUFB9,NDUFB6,NDUFS1,NDUFS3,NDUFV1,NDUFS2,NDUFS8,NFATC3,PRKACA,PDHB,OGDHL,CISD1,NDUFA12,SLC1A3,SDHA,UQCRB,UQCRC2,UQCRC1,SIRT3,NNT,ALDH5A1
GO: Biological Process	GO:0048666	neuron development	5.053e-08	246	897	NRP1,NRP2,ACTG1,AP2B1,MTMR2,AP2A2,AP2A1,AKT1,ALCAM,PHGDH,ANK2,ANK3,APOE,WASL,ARF6,RPS6KA4,ARL3,DCLK1,ARHGAP4,ARHGDIA,RHOG,RHOB,ARHGEF1,PICALM,ATXN10,BCL2,STK24,NCK2,DST,FZD1,CACNB3,NUMB,CDH11,CDH1,CDC42,CDK1,CD44,EVL,CHN1,ARHGEF11,FIG4,CNP,COL1A1,CNTN1,AP2M1,CLU,CLTA,CLTC,CRMP1,ACTR3,COL5A2,COL6A1,COL6A2,COL6A3,COL4A1,COL3A1,COL4A2,CTNNA1,CTNNA2,PLXNC1,ABI2,FLOT1,TRPV2,TRAPPC4,CSNK2A2,CSNK2B,VCAN…
GO: Biological Process	GO:0006644	phospholipid metabolic process	5.108e-08	116	362	DPM1,MTMR1,MTMR2,SGPL1,APOA4,APOA2,APOC2,ARSA,ARSB,ARSD,ASAH1,ATM,MTMR6,PIP5K1A,GNPAT,DEGS1,DGAT1,PLA2G4C,CD81,ISYNA1,IP6K1,CETP,FIG4,PIGT,LPGAT1,ACSL5,PIGK,COL4A3BP,ALG12,VAPB,PLAA,ALG9,GGPS1,PCYT1B,INPP5K,SPTLC2,PRDX6,ACSL3,FDPS,PNPLA6,CLN8,FABP5,KDSR,PLBD1,LPCAT1,GLB1,GLA,BPNT1,ABHD5,SH3GLB1,CDIPT,GM2A,GALC,HADHB,HADHA,GPD1,AGPAT1,HEXA,HEXB,IDI1,SLC27A1,INPPL1,INPP5B,INPP5A,MGLL,INPP4A,INPP1,I…
GO: Biological Process	GO:0044262	cellular carbohydrate metabolic process	5.132e-08	84	240	ACADM,MTMR2,AGL,AKT1,AKT2,DAK,CALM3,ISYNA1,GNPTAB,IP6K1,CS,COLGALT1,INPP5K,NCOR1,FBP1,PTK2B,CHP1,MTOR,GAA,CERCAM,GOT1,GALK2,GALK1,GFPT1,GBE1,GYS1,GYG1,PTGES3,MGEA5,ARFGEF1,SORBS1,GPD2,GNMT,HK2,HK1,HK3,IL6ST,MAT2B,IDH2,IDH1,INPP5A,IMPA1,LDHA,MECP2,MDH1,MDH2,MIF,LDHAL6A,SMEK2,PPP1CC,PPP1CA,ABHD10,CSGALNACT2,PRKAG1,PRKAA1,PPP1R2,PGD,PGAM1,PGM5,PGM1,PFKM,PFKP,NAGK,PFKL,ENPP1,PDK3,SMEK1,PLCD1,PLEK,PHK…
GO: Biological Process	GO:0072330	monocarboxylic acid biosynthetic process	5.257e-08	78	218	ACACA,ACADM,ACADL,ACADVL,AGT,EIF2B2,ALDH9A1,ALDH1A1,EIF2B4,ALDH1A2,ALOX15,ALOX5,ANXA1,APOA4,APOC3,APOC2,BHMT,BGN,DEGS1,AKR1C3,CD74,PTPLAD1,RDH10,VCAN,CSPG4,DCN,CYP27A1,CYP7B1,QKI,EIF2B1,FASN,ACSL3,PTGES2,GOT1,MECR,APIP,PTGES3,HTT,HSD17B4,MCAT,HPGDS,PTPLAD2,MGLL,LTA4H,FADS1,MTHFD1,MTHFR,MTAP,MTR,MGST2,MIF,MYO5A,MAPK9,PRKAG1,PRKAA1,PRKAB2,PRKAB1,ACSF3,ACSS2,RNPEP,PTGS1,PTGIS,PTGDS,SRR,SLC1A3,SHMT1,…
GO: Biological Process	GO:0045087	innate immune response	5.513e-08	168	571	A2M,RIPK1,ADAR,KYNU,VNN1,AIF1,APOA4,ARF6,ARRB2,BCL2,BTK,C1R,C1QC,C2,C1QBP,SERPING1,C6,C7,C8A,C8B,C8G,C9,C4BPA,C5,DAK,CAMK2D,CAMK2G,CAPZA1,CAPZA2,PIAS1,LSM14A,CASP1,CASP8,CD14,SAMHD1,SIN3A,CDK1,CD74,CD44,CCR1,CLU,CREBBP,ECSIT,UNC13D,CTSS,CTSB,CTSL1,MAPK14,ATG9A,TNFAIP8L2,UBE2L6,DDOST,DDX3X,DAPK3,MAPKAPK2,NLRX1,CYLD,CYBB,CFD,ERAP1,ATG5,DUSP3,FGR,SUGT1,MALT1,EPRS,IGKV1-5,F12,CORO1A,CDC37,TMEM173,POL…
GO: Biological Process	GO:0031333	negative regulation of protein complex assembly	5.635e-08	37	78	ADD1,CAPG,CAPZA1,CAPZA2,CAPZB,CDC42,EVL,CLU,DDX3X,FKBP4,TRIOBP,CRBN,ARFGEF1,GSN,SPTBN4,STMN1,MTPN,TMOD3,PPM1A,PFN2,PFN1,PEX14,RDX,TWF1,PEX5,TBCD,SPTB,SPTBN1,SPTA1,SPTAN1,SRC,SPTBN2,SCIN,MAPRE1,VDAC2,TPM1,KANK1
GO: Biological Process	GO:0000209	protein polyubiquitination	5.731e-08	64	168	FBXO4,CDC16,BCL2,BLMH,CDC23,PSMD6,HDAC6,HUWE1,UBR5,PSMD14,PSME3,TRIP12,UBE4A,PSMF1,NPEPPS,STUB1,UBE4B,PRPF19,UBE2K,TRIM56,LNPEP,ITCH,ANAPC1,ANAPC4,NEDD4,PSMC5,PSMC4,PSMD1,PSMC6,PSMD3,PSMD2,PSMB8,PSMB9,PSMC2,PSMC1,PSME1,PSME2,PSMD7,PSMD11,PSMD12,PSMB6,PSMB7,PSMB4,PSMB5,PSMB2,PSMB3,PSMA7,PSMB1,PSMA5,PSMA3,PSMA4,PSMA1,RNF20,MARCH5,RPS27A,TNFAIP3,TRIM5,TRIM21,UBE2H,UBE2L3,UBE3A,TPP2,PSME4,FBXW11
GO: Biological Process	GO:0044273	sulfur compound catabolic process	6.064e-08	23	38	ARSB,BGN,CSAD,PCYOX1L,VCAN,CSPG4,PCYOX1,DCN,FMOD,GLB1,GNS,GALNS,GPC1,HEXA,HEXB,IDS,LUM,OMD,OGN,PRELP,SUOX,TST,ETHE1
GO: Biological Process	GO:0006555	methionine metabolic process	6.08e-08	15	19	EIF2B2,EIF2B4,BHMT,EIF2B1,GOT1,APIP,GNMT,MTHFD1,MTHFR,MTAP,MSRA,MTR,SMS,ADI1,MRI1
GO: Biological Process	GO:0032868	response to insulin stimulus	6.189e-08	96	286	PARP1,AKT1,AHSG,AKT2,GGH,ATP6V0D1,ATP6V1B1,ATP6V1B2,ATP6V0C,ATP6V0A1,ATP6V1E1,ATP6V1C1,BDH1,BCL2,CDK2,CDK1,C2CD5,ATP6V1H,TBC1D4,ACSL5,CRK,AKT3,ATP6V1D,INPP5K,CAB39,EIF4B,EIF4G1,FBP1,FER,MTOR,GAB1,BAIAP2,GOT1,TCIRG1,GFPT1,HADH,HADHA,SORBS1,GRB2,GRB14,IDE,SLC27A1,INPPL1,LYN,CAB39L,FADS1,KRAS,YBX1,PAK1,MYO5A,EEF2K,PPM1A,PPAT,MAP2K1,MAP2K2,PRKDC,MAPK3,MAPK1,PRKAG1,PRKCA,PRKCB,PRKAA1,PRKAB2,PRKAB1,ENP…
GO: Biological Process	GO:0034504	protein localization to nucleus	6.371e-08	92	271	ADAR,PARP1,AGT,AKT1,MCM3AP,SUN2,FZD1,CALR,TOR1AIP1,AKR1C3,SIN3A,CDH1,CDK1,NCKIPSD,G3BP2,NOP58,COL1A1,SUFU,DNAJB6,UBR5,MAPK14,NUTF2,NOLC1,DAB2,DAG1,IPO4,CYLD,NUP155,EMD,EGFR,CHP1,MTOR,NR5A1,TMEM173,FLNA,FAF1,RBPMS,TACC3,IPO11,GNAQ,NDUFA13,TXNIP,HTT,HCLS1,PDIA3,CHERP,IPO7,HSP90AB1,KPNA3,KPNA1,KPNB1,JUP,JAK2,SMAD3,SMAD4,LMNA,MAVS,TNPO1,IPO5,KPNA4,PRDX1,NF1,MED1,MAPK3,MAPK1,PPP3CA,PPP1R10,PML,IPO9,PI…
GO: Biological Process	GO:0016311	dephosphorylation	6.657e-08	104	317	IQGAP1,MTMR1,ACP5,ACP2,ACP1,RNGTT,MTMR2,ALPL,ATP1A1,MTMR6,BCL2,PTPN23,THTPA,SEC16A,FARP1,MPHOSPH10,TIPRL,INPP5K,DUSP9,DUSP3,PPM1F,KIAA0430,PPP6R2,FBP1,EPHX2,CHP1,BPNT1,CD2BP2,HTT,NCKAP1L,RPRD1B,IGBP1,JAK2,PNKP,INPP5B,INPP5A,INPP4A,IMPA1,NCEH1,SMAD3,WNK1,MTM1,NT5E,OCRL,MYO1D,PPP1R12A,SMEK2,MTMR9,PPP1CC,PPM1G,PPP1CA,PPM1A,LHPP,RBM26,PPP5C,PPP6C,PPP2R3A,PPP2R4,PPP4C,PPP3CA,PPP3CB,PPP1R2,PPP2CA,PPP2R…
GO: Biological Process	GO:0042325	regulation of phosphorylation	7.717e-08	256	944	IQGAP1,NRP1,ACADVL,RIPK1,ADAR,ADCY3,ADD1,ADRBK2,AGT,AKT1,SQSTM1,AHSG,AIF1,AKT2,SPAG9,APOE,ARAF,RPS6KA4,ARRB1,ARRB2,ATP6V0D1,BAK1,BAX,BCL2,NCK2,FZD1,C5,CALR,CAV1,SPDYA,LAMTOR3,PRKD2,CDC42,CDK1,CD81,CD74,CD44,CHI3L1,PTPLAD1,CDKN1B,CUL7,CCR1,TPP1,ABI1,CRK,RAD50,TAOK3,PDIA6,PPP1R14A,MAPK14,CSNK2B,CSPG4,CSK,VAPB,DCTN1,LRRK2,MAPKAPK2,DAB2,SLC9A3R1,DLG1,INPP5K,CAB39,DUSP9,DUSP3,GOSR2,PPM1F,EGFR,EIF2S1,P…
GO: Biological Process	GO:0030042	actin filament depolymerization	7.744e-08	24	41	ADD1,CAPG,CAPZA1,CAPZA2,CAPZB,EVL,LIMA1,CFL2,TRIOBP,GSN,SPTBN4,MTPN,MICAL1,TMOD3,PLEK,RDX,TWF1,SPTB,SPTBN1,SPTA1,SPTAN1,SPTBN2,SCIN,TPM1
GO: Biological Process	GO:0030837	negative regulation of actin filament polymerization	7.744e-08	24	41	ADD1,CAPG,CAPZA1,CAPZA2,CAPZB,EVL,TRIOBP,ARFGEF1,GSN,SPTBN4,MTPN,TMOD3,PFN2,PFN1,RDX,TWF1,SPTB,SPTBN1,SPTA1,SPTAN1,SPTBN2,SCIN,TPM1,KANK1
GO: Biological Process	GO:0009725	response to hormone stimulus	7.925e-08	225	812	SERPINA3,ACAA1,ACADM,ACADS,ACAT1,ADCY3,PARP1,AGL,AKT1,AHSG,AIF1,EIF2B2,EIF2B5,EIF2B4,EIF2B3,AKT2,GGH,ALPL,ALDH1A2,ASH2L,ANXA3,ANXA1,APOB,APOA2,APOC3,PLOD3,ARSA,ARSB,ATP6V0D1,ATP2A2,ATP6V1B1,ATP6V1B2,ATP6V0C,ATP6V0A1,ATP6V1E1,ATP6V1C1,BDH1,BID,TXN2,BCKDHB,BCL2,FZD1,CA4,CA2,CALR,CAV1,CASP8,AKR1C3,CDK2,CDK1,C2CD5,ATP6V1H,COL1A1,TBC1D4,ACSL5,CPN1,CRK,AKT3,CTNNA1,CTNNB1,ATP6V1D,CTSS,CTSB,CTSH,CTSL1,CR…
GO: Biological Process	GO:0030330	DNA damage response, signal transduction by p53 class mediator	8.203e-08	47	111	CRADD,ATM,USP10,CDK2,CD74,CD44,CDKN1B,PSMD6,PSMD14,PSME3,DDX5,PSMF1,NDRG1,MIF,MYO6,NBN,PML,PSMC5,PSMC4,PSMD1,PSMC6,PSMD3,PSMD2,PSMB8,PSMB9,PSMC2,PSMC1,PSME1,PSME2,PSMD7,PSMD11,PSMD12,PSMB6,PSMB7,PSMB4,PSMB5,PSMB2,PSMB3,PSMA7,PSMB1,PSMA5,PSMA3,PSMA4,PSMA1,RPS27A,KDM1A,PSME4
GO: Biological Process	GO:0042770	signal transduction in response to DNA damage	8.208e-08	50	121	CRADD,ATM,USP10,SMC1A,CDK2,CD74,CD44,CDKN1B,PSMD6,MAPK14,PSMD14,PSME3,DDX5,PSMF1,NDRG1,GRB2,MIF,MYO6,NBN,PML,PSMC5,PSMC4,PSMD1,PSMC6,PSMD3,PSMD2,PSMB8,PSMB9,PSMC2,PSMC1,PSME1,PSME2,PSMD7,PSMD11,PSMD12,PSMB6,PSMB7,PSMB4,PSMB5,PSMB2,PSMB3,PSMA7,PSMB1,PSMA5,PSMA3,PSMA4,PSMA1,RPS27A,KDM1A,PSME4
GO: Biological Process	GO:0046486	glycerolipid metabolic process	8.714e-08	108	334	DPM1,ACACA,MTMR1,MTMR2,APOB,APOA4,APOA2,APOE,APOC3,APOC2,ATM,MTMR6,PIP5K1A,GNPAT,CAV1,CAT,DGAT1,PLA2G4C,CD81,IP6K1,CETP,FIG4,PIGT,LPGAT1,ACSL5,CPT1A,PIGK,ALG12,DBI,ALG9,PCYT1B,INPP5K,FASN,ACSL3,ACSL1,ACSL4,PNPLA6,FABP5,PLBD1,LPCAT1,BPNT1,ABHD5,SH3GLB1,CDIPT,HADHB,HADHA,GPX1,GPD1,AGPAT1,IL6ST,SLC27A1,INPPL1,INPP5B,INPP5A,MGLL,INPP4A,INPP1,IMPA1,LIPE,MTM1,MECP2,OCRL,AGPAT3,SLC44A2,PPP1CC,PPP1CA,PON…
GO: Biological Process	GO:0000082	G1/S transition of mitotic cell cycle	8.77e-08	79	224	CRADD,AKT1,AIF1,ATM,BID,BCL2,CAMK2D,CAMK2G,CUL4A,CUL3,CUL2,CUL1,SPDYA,CDK2,CDK4,CDK6,CDK1,KANK2,CDKN1B,PSMD6,PSMD14,PSME3,DDX3X,DLG1,PSMF1,CDC73,EGFR,FHL1,RPS27L,GSPT1,MCM4,MCM3,MCM6,MCM5,MCM2,MCM7,MNAT1,ORC4,ORC2,PCNA,NBN,PPP6C,PPP3CA,PML,PSMC5,PSMC4,PSMD1,PSMC6,PSMD3,PSMD2,PSMB8,PSMB9,PSMC2,PSMC1,PSME1,PSME2,PSMD7,PSMD11,PSMD12,PSMB6,PSMB7,PSMB4,PSMB5,PSMB2,PSMB3,PSMA7,PSMB1,PSMA5,PSMA3,PSMA4,P…
GO: Biological Process	GO:0030834	regulation of actin filament depolymerization	9.227e-08	22	36	ADD1,CAPG,CAPZA1,CAPZA2,CAPZB,EVL,LIMA1,TRIOBP,GSN,SPTBN4,MTPN,TMOD3,PLEK,RDX,TWF1,SPTB,SPTBN1,SPTA1,SPTAN1,SPTBN2,SCIN,TPM1
GO: Biological Process	GO:0040012	regulation of locomotion	9.968e-08	150	502	AAMP,ABR,NRP1,NRP2,ACP5,ADAM10,ADA,AGT,AKT1,AIF1,AKT2,SPAG9,ANXA3,APOE,APEX1,ARHGAP5,ARHGAP4,USP14,SUN2,BCL2,STK24,C1QBP,C5,CAMK2D,IKBKAP,CALR,PRKD2,CDK6,CLIC4,AOC3,CD74,CCR1,COL1A1,HDAC6,CTSH,MAPK14,CSNK2B,LRRK2,DAPK3,DAB2,DAG1,SLC9A3R1,DIAPH1,MMRN2,ROCK2,ECM1,DPYSL3,DPEP1,PPM1F,EGFR,PTK2B,FGR,FER,FES,NISCH,CORO1A,GAB1,MIA3,GNB2L1,COL18A1,NCKAP1L,GNA13,HRG,HMOX1,SPATA13,IL6ST,ICAM1,RAP2C,JAK2,EP…
GO: Biological Process	GO:0051494	negative regulation of cytoskeleton organization	1.067e-07	40	89	ADD1,ARHGAP6,ARHGEF2,CAPG,CAPZA1,CAPZA2,CAPZB,KANK2,EVL,LIMA1,HDAC6,INPP5K,FKBP4,CORO1A,TRIOBP,ARFGEF1,GSN,SPTBN4,STMN1,MAP1B,MAP1A,MTPN,KANK3,TMOD3,PFN2,PFN1,RDX,TWF1,ARAP1,TBCD,SPTB,SPTBN1,SPTA1,SPTAN1,SPTBN2,SCIN,MAPRE1,TPM1,CLASP1,KANK1
GO: Biological Process	GO:0000077	DNA damage checkpoint	1.101e-07	55	139	FBXO6,CRADD,MBD4,ATM,INTS7,CDK2,CDK1,CDKN1B,BRCC3,PSMD6,TAOK3,MAPK14,PSMD14,PSME3,MAPKAPK2,TIPRL,PSMF1,BRE,RPS27L,H2AFX,TAOK1,MSH2,NBN,PML,PSMC5,PSMC4,PSMD1,PSMC6,PSMD3,PSMD2,PSMB8,PSMB9,PSMC2,PSMC1,PSME1,PSME2,PSMD7,PSMD11,PSMD12,PSMB6,PSMB7,PSMB4,PSMB5,PSMB2,PSMB3,PSMA7,PSMB1,PSMA5,PSMA3,PSMA4,PSMA1,PTPN11,RPS27A,XPC,PSME4
GO: Biological Process	GO:0032535	regulation of cellular component size	1.101e-07	73	203	NRP1,ADD1,AKT1,APOE,WASL,ARF6,ARHGAP5,ARHGAP4,NCK2,CAPG,CAPZA1,CAPZA2,CAPZB,EVL,LIMA1,ARPC2,ACTR3,ARPC3,ARPC1B,ARPC4,TRPV2,DLG1,PTK2B,FER,CLN8,MTOR,CORO1A,TRIOBP,WDR36,CDC42EP2,HCK,NCKAP1L,HCLS1,ARFGEF1,GSN,GRB2,ARPC1A,HSP90AB1,ARPC5L,SPTBN4,ILK,PREX1,MAP1B,MAPT,MTPN,ACTR3B,DEPTOR,NCK1,RTN4,TMOD3,PFN2,PFN1,PLXNA3,PLEK,RDX,PYCARD,RASA1,TWF1,RAC1,SSH1,SSH3,SPTB,SPTBN1,SPTA1,SPTAN1,SPTBN2,SCIN,TSC2,…
GO: Biological Process	GO:0006575	cellular modified amino acid metabolic process	1.104e-07	76	214	KYNU,VNN1,GGACT,P4HA2,GSTK1,ASL,ATIC,ALDH7A1,BHMT,KMO,CCBL1,AASDHPPT,PPCDC,ALDH4A1,MTHFD1L,CKB,COMT,GGCT,PCYOX1L,CRYM,PCYOX1,DNMT1,DNMT3A,DPEP1,FASN,COASY,ALDH1L1,PADI2,G6PD,FOLH1,GLO1,GCLC,GOT2,CPQ,GART,GAMT,GATM,GSTZ1,GSTT1,GSTP1,GSTM3,GSTM1,HTT,HAGH,GPX1,GSS,GSTA4,GNMT,MAT2B,IDH1,SLC27A1,MTHFD1,MTHFR,MUT,MTR,MAT2A,MGST2,MGST3,MGST1,P4HA1,P4HB,MED1,CNDP2,ALDH18A1,CCBL2,SOD1,SHMT1,SHMT2,DDAH1,PA…
GO: Biological Process	GO:0006401	RNA catabolic process	1.104e-07	76	214	PABPC4,ATM,UPF2,PNPT1,CNOT10,EIF4A3,THRAP3,RBM8A,DDX6,NUDT16,EIF4B,EIF4G1,FEN1,POP1,RNPS1,ETF1,EDC3,PAIP1,GSPT1,RNASEH2A,LSM3,HNRNPD,LSM2,EIF3E,PABPC1,UPF3B,MAGOH,ZC3HAV1,MLH1,OAS2,CNOT7,NCBP1,RPL10A,CNOT3,CNOT2,POLD1,EXOSC10,PPP1R8,PPP2CA,PPP2R1A,DCP1B,UPF1,RPL10,RPL19,RNASE6,RNASE3,DCPS,RNH1,ABCE1,XRN1,EDC4,RPS5,RPS9,RPS12,RPS10,RPLP1,RPS4X,RPS3A,RPS3,RPLP0,RPL22,RPS21,GSPT2,RPS27A,RPS15,RPS15A…
GO: Biological Process	GO:0000075	cell cycle checkpoint	1.17e-07	88	259	FBXO6,CRADD,MBD4,AKT1,CDC16,NAE1,BUB3,ZW10,ATM,TRRAP,SMC1A,CDC23,INTS7,CDK2,CDK1,CDKN1B,BRCC3,PSMD6,TAOK3,MAPK14,PSMD14,CSNK2A2,PSME3,DDB1,MAPKAPK2,TIPRL,DLG1,PSMF1,BRE,DYNC1LI1,NDRG1,RPS27L,H2AFX,TAOK1,MRE11A,MSH2,INTS3,MCM4,MCM3,MCM6,MCM5,MCM2,MCM7,ORC4,ANAPC1,ORC2,NBN,ANAPC4,PML,PCID2,RFC2,RFC5,RFC4,PSMC5,PSMC4,PSMD1,PSMC6,PSMD3,PSMD2,PSMB8,PSMB9,PSMC2,PSMC1,PSME1,PSME2,PSMD7,PSMD11,PSMD12,PSM…
GO: Biological Process	GO:0032984	macromolecular complex disassembly	1.175e-07	71	196	NAPA,ADD1,BAZ1B,ARHGEF2,ARID1A,CAPG,CAPZA1,CAPZA2,CAPZB,EVL,LIMA1,NEDD1,CFL2,HDAC6,TRPV4,ETF1,SUPT16H,TRIOBP,MGEA5,GSN,KLC1,KIF5B,SPTBN4,STMN1,MAP1B,MAP1A,MTPN,MICAL1,RPL10A,TMOD3,PEX14,ARID2,PLEK,UPF1,RDX,RPL10,RPL19,TWF1,SMARCD3,SMARCE1,SMARCD2,SMARCC2,SMARCB1,SMARCC1,SMARCA4,SET,RPS5,RPS9,RPS12,RPS10,RPLP1,RPS4X,RPS3A,RPS3,RPLP0,RPL22,RPS21,GSPT2,RPS27A,RPS15,RPS15A,RPS19,RPS16,SPTB,SPTBN1,SPT…
GO: Biological Process	GO:0016051	carbohydrate biosynthetic process	1.189e-07	66	178	ACADM,AGL,AKT1,AKT2,ALDOC,ALDOA,RGN,SLC25A11,SLC25A12,ISYNA1,GNPDA1,SLC25A13,COLGALT1,INPP5K,MPDU1,ENO2,FBP1,PTK2B,MTOR,G6PD,FUT8,CERCAM,GOT2,GOT1,AKR1A1,GFPT1,GBE1,GYS1,GYG1,PTGES3,SORBS1,GPD2,GPI,GPD1,GNMT,MAT2B,IMPA1,MDH1,MDH2,PCK2,PC,NFKB1,SMEK2,PPP1CA,CSGALNACT2,PRKACG,PRKACB,PRKACA,PGD,PGAM1,PGM5,PGM1,ENPP1,SMEK1,PMM2,PLCD1,PLEK,CMAS,SLC25A1,SORD,TKT,IMPAD1,PGM2,TALDO1,COG2,UGP2
GO: Biological Process	GO:0051084	'de novo' posttranslational protein folding	1.215e-07	27	50	CCT6A,CD74,TOR1A,HSPH1,TUBA1B,TUBB4B,TUBB3,SH3GLB1,CCT8,CCT4,CCT2,HSPA8,TOR1B,TOR2A,DNAJB1,TUBB2B,UGGT1,ERO1L,TOR3A,TBCE,TBCD,TBCC,CCT5,TUBB6,TUBB2A,TUBA4A,CCT3
GO: Biological Process	GO:0097193	intrinsic apoptotic signaling pathway	1.257e-07	49	119	RIPK1,MBD4,APAF1,ATM,AIFM1,SART1,BAK1,BAX,BCL2,STK24,CUL4A,CUL3,CUL2,CUL1,CAV1,BCLAF1,CLU,DNM1L,DDX5,DDX3X,PPM1F,GNB2L1,RPS27L,FIS1,MSH6,GPX1,MYBBP1A,HMOX1,UBE2K,HTRA2,IFI16,JAK2,ITPR1,MSH2,MAP3K5,MLH1,OPA1,ERO1L,PRKCA,ZNF622,PML,PYCARD,DAB2IP,DNAJC10,SRC,UACA,VDAC2,CUL5,BAG6
GO: Biological Process	GO:0051346	negative regulation of hydrolase activity	1.348e-07	97	294	A2M,SERPINA3,AGT,AKT1,AKT2,AMBP,AIP,APOA2,APOC3,ARRB1,ARRB2,SERPINC1,USP14,PRDX5,RECK,SERPING1,CAST,SERPINA6,SERPINH1,CD44,CNN3,DNAJB6,FARP1,CSTB,UCHL5,CRYAB,MPHOSPH10,LRRK2,DDX3X,TIPRL,PSMF1,ECM1,DPEP1,SERPINB1,KIAA0430,PAPLN,TMED2,PRDX3,CHP1,SERPINA10,CD2BP2,ITIH5,GCHFR,SERPIND1,HTT,NCKAP1L,ARFGEF1,GPX1,GPI,HRG,IGBP1,IFIT1,IFI16,KNG1,ITIH3,ITIH2,ITIH1,ITIH4,LEPR,BIRC6,WNK1,PI16,LXN,PEBP1,PAK2,S…
GO: Biological Process	GO:0010466	negative regulation of peptidase activity	1.442e-07	68	186	A2M,SERPINA3,AGT,AKT1,AKT2,AMBP,ARRB1,SERPINC1,USP14,PRDX5,RECK,SERPING1,CAST,SERPINA6,SERPINH1,CD44,DNAJB6,CSTB,UCHL5,CRYAB,DDX3X,PSMF1,ECM1,DPEP1,SERPINB1,PAPLN,PRDX3,SERPINA10,ITIH5,SERPIND1,HTT,GPX1,GPI,HRG,IGBP1,IFI16,KNG1,ITIH3,ITIH2,ITIH1,ITIH4,BIRC6,PI16,LXN,PEBP1,PAK2,SERPINA5,MICAL1,POR,CD109,SERPINF1,SERPINF2,PCID2,SERPINA1,SERPINA4,SERPINB6,SERPINB8,SERPINE2,SERPINB10,SERPINB9,RENBP,R…
GO: Biological Process	GO:0051650	establishment of vesicle localization	1.453e-07	30	59	SNAP23,GBF1,ARCN1,CUL3,SEC16A,SEC24D,COPA,COPB1,RAB11B,COPB2,SEC24C,TMED10,TMED2,SEC24A,SEC23A,SAR1B,SEC24B,YKT6,COPE,MYO5A,SEPT5,MAP2K1,ARFGAP1,RAB27A,TMED9,SEC13,BBS7,COPG1,SEC31A,SCRIB
GO: Biological Process	GO:0051790	short-chain fatty acid biosynthetic process	1.544e-07	16	22	EIF2B2,EIF2B4,BHMT,EIF2B1,GOT1,APIP,MTHFD1,MTHFR,MTAP,MTR,ACSS2,SLC1A3,THNSL2,ADI1,ACSS1,MRI1
GO: Biological Process	GO:0045859	regulation of protein kinase activity	1.571e-07	186	654	IQGAP1,ACADVL,RIPK1,ADAR,ADCY3,ADD1,AGT,AKT1,SPAG9,APOE,ARAF,ARRB1,ATP6V0D1,NCK2,C5,CALR,CAV1,SPDYA,LAMTOR3,CDC42,CDK1,CD81,CD74,CHI3L1,PTPLAD1,CDKN1B,CUL7,CCR1,TPP1,ABI1,CRK,TAOK3,PDIA6,MAPK14,CSNK2B,CSPG4,CSK,VAPB,DCTN1,LRRK2,MAPKAPK2,DAB2,SLC9A3R1,DLG1,INPP5K,CAB39,DUSP9,DUSP3,GOSR2,PPM1F,EGFR,EIF2S1,PTK2B,ACSL1,PDIA5,FGR,CDK5RAP3,MALT1,ERBB2,EXTL3,PDCD10,CHP1,MTOR,AKAP13,MAP4K5,CDC37,GAB1,FAF…
GO: Biological Process	GO:0030334	regulation of cell migration	1.669e-07	134	441	AAMP,ABR,NRP1,NRP2,ACP5,ADAM10,ADA,AGT,AKT1,AIF1,AKT2,SPAG9,ANXA3,APOE,APEX1,ARHGAP5,ARHGAP4,SUN2,BCL2,STK24,C1QBP,C5,CAMK2D,IKBKAP,CALR,PRKD2,CLIC4,AOC3,CD74,CCR1,COL1A1,HDAC6,CTSH,MAPK14,CSNK2B,DAB2,DAG1,SLC9A3R1,DIAPH1,MMRN2,ECM1,DPYSL3,DPEP1,PPM1F,EGFR,PTK2B,FGR,FER,NISCH,CORO1A,GAB1,MIA3,GNB2L1,COL18A1,NCKAP1L,GNA13,HRG,HMOX1,SPATA13,IL6ST,ICAM1,RAP2C,JAK2,EPB41L5,ITGAV,ITGA5,ILK,LYN,SMAD3,L…
GO: Biological Process	GO:0032318	regulation of Ras GTPase activity	1.714e-07	70	194	ARFGAP3,ALDH1A1,AKT2,ARHGAP5,ARHGAP4,RHOG,PIP5K1A,TBC1D10B,PKP4,TBC1D5,DOCK4,CHN1,ACAP1,GIT2,TBC1D4,CRK,TBC1D17,PTK2B,ERBB2,EPHB3,MTOR,FGD3,ADAP1,CDC42EP2,NCKAP1L,AGRN,ARFGEF1,ASAP1,ARHGAP35,AGFG1,PREX1,LLGL1,SMAP2,RALGAPA2,MYO9B,TBC1D15,RALGAPB,NF1,TBC1D2,MAP2K1,ARFGAP1,PIN1,TBC1D23,RAP1GDS1,PYCARD,RANGAP1,RASA1,GIT1,PTK2,DAB2IP,ARAP1,AGAP3,SIPA1,PLXNB2,RABGAP1,TBC1D13,RALGAPA1,THY1,RASIP1,SYDE1…
GO: Biological Process	GO:0072331	signal transduction by p53 class mediator	1.889e-07	53	134	CRADD,ATM,USP10,CDK2,CD74,CD44,CDKN1B,PSMD6,PSMD14,PSME3,DDX5,PSMF1,NDRG1,RPS27L,MYBBP1A,IFI16,MSH2,MIF,MYO6,NBN,PML,PYCARD,PSMC5,PSMC4,PSMD1,PSMC6,PSMD3,PSMD2,PSMB8,PSMB9,PSMC2,PSMC1,PSME1,PSME2,PSMD7,PSMD11,PSMD12,PSMB6,PSMB7,PSMB4,PSMB5,PSMB2,PSMB3,PSMA7,PSMB1,PSMA5,PSMA3,PSMA4,PSMA1,RPS27A,KDM1A,BAG6,PSME4
GO: Biological Process	GO:0030155	regulation of cell adhesion	1.933e-07	97	296	ACP5,ADAM10,ADA,ALOX15,ANK3,ARHGAP6,ARHGDIB,ARHGDIA,BCL2,C1QBP,CALR,CASK,PRKD2,CDK6,CDH1,CD44,SPOCK2,COL1A1,ARPC2,DAB2,CYTH1,LPXN,ROCK2,DPP4,PPM1F,PTK2B,FES,PLEKHA2,ERBB2,EPHB3,EMILIN1,FAF1,TRIOBP,MIA3,VAV3,GSTP1,NCKAP1L,GSN,HRG,RBPJ,ICAM1,KNG1,JAK2,ITGAL,EPB41L5,ITGAV,ITGA5,ITGA6,ILK,LYN,SMAD3,LGALS1,LAMB1,LAMA4,LAMA2,LAMA3,FERMT3,MYO1F,MMP14,MMP2,PPP1R12A,NF1,NF2,NID1,MAP2K1,PRKG1,PRKCA,PPP2CA,…
GO: Biological Process	GO:0030162	regulation of proteolysis	2.101e-07	62	166	SERPINA3,AGT,AKT1,APOE,SERPINC1,USP14,SERPING1,SERPINA6,SERPINH1,CLU,SUFU,HDAC6,UCHL5,PSMD14,PSME3,LRRK2,DAB2,RAB23,SERPINB1,PTK2B,CLN8,F2,GCLC,SERPINA10,GNB2L1,STUB1,MGEA5,SERPIND1,HDAC2,GPX1,HSP90AB1,UBE2K,IDE,KNG1,SH3D19,NRD1,UBQLN4,SERPINA5,PRKACA,SERPINF1,SERPINF2,PML,PIK3R1,SERPINA1,SERPINA4,SERPINB6,SERPINB8,SERPINE2,SERPINB10,SERPINB9,PTK2,RAD23B,RAD23A,HSPBP1,TAF1,SERPINA7,WFS1,VCP,NR1H2…
GO: Biological Process	GO:0006907	pinocytosis	2.163e-07	11	12	ACTN4,AHSG,MAPKAPK2,DAB2,DOCK2,SNX5,PPT1,PYCARD,NR1H2,EHD4,MAPKAPK3
GO: Biological Process	GO:0001775	cell activation	2.226e-07	229	839	A2M,ABR,ACTN1,ACTN4,ACTN2,ADAM10,ADA,AP3D1,ADK,SKAP2,AGT,VNN1,AKT1,AIF1,ALB,ALDOA,ANXA3,ANXA1,APOE,ARRB1,ARRB2,RHOG,RHOB,ATM,SART1,BAK1,BAX,BCL2,BTK,NCK2,SERPING1,CAST,CALU,CALM3,AP3B1,CAV1,CASP1,ENTPD1,ENTPD2,CD9,CDK6,CDC42,CD81,CD74,CD59,EVL,COL1A1,CLU,CLPTM1,WDR1,CRK,COL3A1,MAP3K8,UNC13D,CTNNB1,MAPK14,CSK,TNFAIP8L2,DDOST,DLG1,CFD,DUSP3,DPP4,DOCK2,NCOR1,EGFR,PTK2B,FGR,FGG,FGB,FER,FGA,FES,MALT1,…
GO: Biological Process	GO:0051130	positive regulation of cellular component organization	2.362e-07	164	566	ABR,ACTN4,FAM162A,ADD1,AKT1,AHSG,BIN1,ANXA1,ANXA2,APOE,APOC2,WASL,ARF6,RPS6KA4,ARRB1,ARRB2,ARHGDIA,RHOG,BID,BAK1,BAX,NIPBL,STK24,NCK2,C1QBP,CALR,CBL,CAV1,NUMB,CD14,POT1,CDC42,SH2B1,BCLAF1,EVL,CDKN1B,FIG4,COL1A1,CNTN1,HDAC6,ARPC2,ACTR3,ARPC4,DNM1L,SORBS3,CTNNB1,CTBP1,TRPV2,SNX9,DAB2,DNMT1,DLG1,RAB8B,ROCK2,DPYSL3,DOCK2,NCOR1,ARHGEF10,PPM1F,CTR9,PTK2B,WDR61,FER,FES,MPP7,TRPV4,EPHB3,MTOR,CORO1A,KIF3A…
GO: Biological Process	GO:0030866	cortical actin cytoskeleton organization	2.398e-07	14	18	ARF6,FMNL1,CALR,DLG1,EPB41,EPB41L2,NCKAP1L,LLGL1,PLEK,CORO1C,TLN1,STRIP1,EHD2,EPB41L3
GO: Biological Process	GO:0007411	axon guidance	2.568e-07	116	372	NRP1,NRP2,ACTG1,AP2B1,AP2A2,AP2A1,ALCAM,ANK2,ANK3,WASL,RPS6KA4,RHOG,RHOB,NCK2,CACNB3,NUMB,CDC42,CDK1,EVL,CHN1,ARHGEF11,COL1A1,CNTN1,AP2M1,CLTA,CLTC,CRMP1,COL5A2,COL6A1,COL6A2,COL6A3,COL4A1,COL3A1,COL4A2,PLXNC1,FLOT1,CSNK2A2,CSNK2B,DLG1,MYH14,ROCK2,DPYSL3,DPYSL2,DOCK1,EGFR,STIP1,FES,ERBB2,EPHB3,CAP2,CAP1,MYL9,TUBB3,AGRN,DPYSL4,GPC1,GRB2,ARHGAP35,HSP90AB1,SPTBN4,ITGA9,ITGAV,ITGA1,ITGA5,ABLIM1,LAMC1…
GO: Biological Process	GO:0007005	mitochondrion organization	2.727e-07	85	252	FAM162A,AKT1,TIMM13,AIP,SLC25A4,SLC25A6,AIFM1,BCS1L,SAMM50,BID,BAK1,BAX,BCL2,C1QBP,CASP7,PNPT1,TOMM70A,CNP,CLU,MFN2,AKT3,PPIF,COL4A3BP,DNM1L,GGCT,LRRK2,LONP1,TYMP,PMPCB,AFG3L2,PRDX3,CLN8,TARS2,TOMM40,VAT1,TIMM44,SH3GLB1,TRNT1,YARS2,FIS1,GFER,HTT,MTX2,GPX1,HSPA4,HMGCL,HK2,HTRA2,IFIT2,PARK7,SMAD3,AARS2,LETM1,MTM1,MAN2A1,MIPEP,OPA1,TOMM22,NDUFS8,GOLPH3,MAPK9,MFN1,ATG3,PYCARD,MRPL15,NDUFAF4,PEX5,MRPL…
GO: Biological Process	GO:0001934	positive regulation of protein phosphorylation	2.729e-07	176	617	IQGAP1,NRP1,ACADVL,RIPK1,ADCY3,ADD1,ADRBK2,AGT,AKT1,SQSTM1,AIF1,AKT2,SPAG9,ARAF,RPS6KA4,ARRB1,ARRB2,ATP6V0D1,BCL2,FZD1,C5,CALR,CAV1,SPDYA,LAMTOR3,PRKD2,CDC42,CDK1,CD81,CD74,CD44,CHI3L1,PTPLAD1,CUL7,CCR1,TPP1,ABI1,CRK,RAD50,TAOK3,PDIA6,MAPK14,CSNK2B,CSPG4,CSK,VAPB,DCTN1,LRRK2,MAPKAPK2,DAB2,DLG1,CAB39,GOSR2,EGFR,EIF2S1,PTK2B,ACSL1,PDIA5,MALT1,ERBB2,EXTL3,F2,PDCD10,MTOR,MAP4K5,GAB1,RBPMS,TAB1,GNB2L1…
GO: Biological Process	GO:0051170	nuclear import	2.78e-07	81	237	ADAR,PARP1,AGT,AKT1,MCM3AP,FZD1,AKR1C3,CDH1,CDK1,NCKIPSD,G3BP2,NOP58,SUFU,UBR5,MAPK14,NUTF2,NOLC1,DAB2,DAG1,IPO4,CYLD,NUP155,EMD,EGFR,CHP1,MTOR,TMEM173,FLNA,FAF1,RBPMS,TACC3,IPO11,GNAQ,NDUFA13,TXNIP,HTT,HCLS1,PDIA3,CHERP,IPO7,HTATIP2,HSP90AB1,KPNA3,KPNA1,KPNB1,JUP,JAK2,SMAD3,SMAD4,LMNA,MAVS,TNPO1,IPO5,KPNA4,PRDX1,NF1,MED1,MAPK3,MAPK1,PPP3CA,PPP1R10,PML,IPO9,PIK3R1,RAN,DAB2IP,AGAP3,KPNA6,DDX58,PHI…
GO: Biological Process	GO:0031570	DNA integrity checkpoint	2.897e-07	56	146	FBXO6,CRADD,MBD4,NAE1,ATM,INTS7,CDK2,CDK1,CDKN1B,BRCC3,PSMD6,TAOK3,MAPK14,PSMD14,PSME3,MAPKAPK2,TIPRL,PSMF1,BRE,RPS27L,H2AFX,TAOK1,MSH2,NBN,PML,PSMC5,PSMC4,PSMD1,PSMC6,PSMD3,PSMD2,PSMB8,PSMB9,PSMC2,PSMC1,PSME1,PSME2,PSMD7,PSMD11,PSMD12,PSMB6,PSMB7,PSMB4,PSMB5,PSMB2,PSMB3,PSMA7,PSMB1,PSMA5,PSMA3,PSMA4,PSMA1,PTPN11,RPS27A,XPC,PSME4
GO: Biological Process	GO:0006921	cellular component disassembly involved in execution phase of apoptosis	3.171e-07	35	76	ADD1,APAF1,AIFM1,BAX,STK24,FOXL2,CASP7,CASP8,CDH1,DNM1L,CTNNB1,TJP2,DSP,DSG2,ENDOG,NDUFA13,GSN,HMGB2,HTRA2,KPNA1,KPNB1,LMNB1,LMNA,MAPT,PAK2,PPT1,PLEC,ROCK1,PTK2,SOD1,TJP1,TOP2A,SPTAN1,ACIN1,VIM
GO: Biological Process	GO:0010827	regulation of glucose transport	3.179e-07	40	92	AKT1,AK1,AKT2,CLTCL1,RAE1,PEA15,AOC3,C2CD5,NUPL1,NUP153,NUP35,NUP37,ASPSCR1,INPP5K,NUP155,NUP93,NUP50,NUPL2,NUP85,MGEA5,SORBS1,HK2,MIF,NUP88,NUP107,PRKCA,PRKCB,PRKAA1,ITLN1,ENPP1,PIK3R1,NUP133,SEH1L,PTPN11,PID1,NUP54,NUP214,NUP205,NUP210,NUP160
GO: Biological Process	GO:0006606	protein import into nucleus	3.235e-07	80	234	ADAR,PARP1,AGT,AKT1,MCM3AP,FZD1,AKR1C3,CDH1,CDK1,NCKIPSD,G3BP2,NOP58,SUFU,UBR5,MAPK14,NUTF2,NOLC1,DAB2,DAG1,IPO4,CYLD,NUP155,EMD,EGFR,CHP1,MTOR,TMEM173,FLNA,FAF1,RBPMS,TACC3,IPO11,GNAQ,NDUFA13,TXNIP,HTT,HCLS1,PDIA3,CHERP,IPO7,HSP90AB1,KPNA3,KPNA1,KPNB1,JUP,JAK2,SMAD3,SMAD4,LMNA,MAVS,TNPO1,IPO5,KPNA4,PRDX1,NF1,MED1,MAPK3,MAPK1,PPP3CA,PPP1R10,PML,IPO9,PIK3R1,RAN,DAB2IP,AGAP3,KPNA6,DDX58,PHIP,TLR2,S…
GO: Biological Process	GO:0044744	protein targeting to nucleus	3.235e-07	80	234	ADAR,PARP1,AGT,AKT1,MCM3AP,FZD1,AKR1C3,CDH1,CDK1,NCKIPSD,G3BP2,NOP58,SUFU,UBR5,MAPK14,NUTF2,NOLC1,DAB2,DAG1,IPO4,CYLD,NUP155,EMD,EGFR,CHP1,MTOR,TMEM173,FLNA,FAF1,RBPMS,TACC3,IPO11,GNAQ,NDUFA13,TXNIP,HTT,HCLS1,PDIA3,CHERP,IPO7,HSP90AB1,KPNA3,KPNA1,KPNB1,JUP,JAK2,SMAD3,SMAD4,LMNA,MAVS,TNPO1,IPO5,KPNA4,PRDX1,NF1,MED1,MAPK3,MAPK1,PPP3CA,PPP1R10,PML,IPO9,PIK3R1,RAN,DAB2IP,AGAP3,KPNA6,DDX58,PHIP,TLR2,S…
GO: Biological Process	GO:0040011	locomotion	3.257e-07	342	1336	AAMP,ABR,NRP1,NRP2,ACP5,ACTG1,ADAM10,ADA,AP2B1,AP2A2,AP2A1,AGT,AKT1,SGPL1,ARHGEF7,AIF1,ALCAM,AKT2,ANK2,SPAG9,ANXA3,DOK2,ANK3,APOB,APOE,LIMD1,APEX1,WASL,RPS6KA4,ARRB2,DCLK1,ARHGAP5,ARHGAP4,RHOG,RHOB,ATP1A2,SLC16A3,USP14,ATP1B1,SUN2,BAX,BCL2,PIP5K1A,STK24,NCK2,DST,FMNL1,C1QBP,C5,CAMK2D,IKBKAP,CALR,CACNB3,CDC42BPA,CUL3,CAV1,PRKD2,NUMB,CDK6,RIC8A,CLIC4,CDC42,AOC3,CDK1,CD81,CD74,CD44,EVL,DOCK4,CHN1,AR…
GO: Biological Process	GO:0022604	regulation of cell morphogenesis	3.753e-07	105	331	NRP1,ALDOA,ANXA7,APOE,LIMD1,ZMYM3,ARHGAP4,ARHGDIA,ARHGEF1,STK24,C21orf2,FMNL1,C1QBP,CALR,CAPZB,NUMB,SEPT7,CHN1,COL1A1,ARPC2,ACTR3,CTNNB1,TRPV2,LRRK2,DAB2,DIAPH1,MYH14,EPB41,EPB41L2,PTK2B,FERMT2,FGR,FES,EPHB3,F2,CORO1A,FN1,TRIOBP,FGD3,WDR36,CDC42EP2,STK25,GOLGA2,CFDP1,GDI1,HCK,MYL12A,GNA13,CDC42EP3,PDLIM5,ARHGAP35,HEXB,ICAM1,ITGB2,EPB41L5,ILK,CAPRIN1,SMAD2,SMAD3,SMAD4,MAP1B,MAPT,MIF,SH3D19,MYH9,RT…
GO: Biological Process	GO:0021700	developmental maturation	4.08e-07	117	379	AP3D1,AP1M1,AP1S2,AP2B1,AP1B1,AP2A2,AP2A1,AP1G1,AKT1,ALDH1A2,BCL2,BTK,RECK,CANX,CALR,AP3B1,CD74,PSMD6,SEC24D,AP2M1,CLTA,CLTC,PTBP3,CTNNB1,CTSS,CTSD,ACTR1A,ACTR1B,CTSL1,PSMD14,PSME3,CSPG4,DCTN1,LRRK2,DAG1,CYBB,DYNC1H1,DYNC1LI2,DYNC1I2,KIF3B,DNM2,DLD,PSMF1,SEC24C,PTK2B,SEC24A,G6PD,KIF3A,DCTN4,SEC23A,SAR1B,GNAQ,SEC24B,AGRN,PDIA3,DCTN2,HLA-DRA,HLA-DPA1,RBPJ,KLC1,KIF2A,KIF5A,SPTBN4,ITGB5,ITGAV,LNPEP,M…
GO: Biological Process	GO:0010639	negative regulation of organelle organization	4.531e-07	68	191	ADD1,NOC2L,AKT1,CDC16,ARHGAP6,BUB3,ARHGEF2,ATM,CAPG,CAPZA1,CAPZA2,CAPZB,POT1,CDC23,SIN3A,KANK2,EVL,LIMA1,HDAC6,CTBP1,UBR5,TRIP12,DNMT1,INPP5K,FKBP4,ERCC4,CORO1A,TRIOBP,VAT1,DYNC1LI1,ARFGEF1,GSN,SPTBN4,STMN1,MAP1B,MAP1A,MTPN,MECP2,OPA1,ANAPC1,KANK3,ANAPC4,TMOD3,PFN2,PFN1,PML,PCID2,RDX,TWF1,ARAP1,TERF2IP,SET,SETMAR,TAF7,TBCD,SPTB,SPTBN1,SPTA1,SPTAN1,SPTBN2,SCIN,MAPRE1,KDM1A,OMA1,TPM1,CLASP1,WAPAL,K…
GO: Biological Process	GO:0071495	cellular response to endogenous stimulus	4.652e-07	224	825	ADCY3,PARP1,ADRBK1,AKT1,AHSG,AIF1,AKT2,APAF1,ANXA1,APOB,PLOD3,ARRB2,FIBP,ATP6V0D1,ATP6V1B1,ATP6V1B2,ATP6V0C,ATP6V0A1,ATP6V1E1,ATP6V1C1,USP9X,FZD1,CALM3,CBL,LAMTOR3,PRKD2,AKR1C3,CDK2,CDH1,CDK1,CD44,CDK9,CDKN1B,C2CD5,RAB14,ATP6V1H,COL1A1,TBC1D4,USP15,ACSL5,CRK,AKT3,COL5A2,COL6A1,COL4A6,COL4A1,COL3A1,COL4A2,CTNNA1,CTNNB1,ATP6V1D,CTSS,UCHL5,CTSB,CTSH,CTSL1,CSK,DAB2,CYP11A1,CYP17A1,DNMT1,DNMT3A,TGFBRA…
GO: Biological Process	GO:0008544	epidermis development	4.717e-07	142	481	AARS,TRADD,AP3D1,AP1M1,AP1S2,AP2B1,AP1B1,AP2A2,AP2A1,AP1G1,AKT1,ALDH3A2,ANXA1,PLOD3,ATP2A2,BCL2,BTD,PIP5K1A,CANX,CALR,AP3B1,AKR1C3,CLIC4,CDC42,CD74,PSMD6,SEC24D,COL1A1,AP2M1,SUFU,CLTA,CLTC,CRABP2,COL5A2,COL3A1,ABCB6,CTNND1,CTNNB1,CTSS,CTSD,ACTR1A,ACTR1B,CTSL1,PSMD14,PSME3,DCTN1,DBI,CYBB,DYNC1H1,DYNC1LI2,DYNC1I2,KIF3B,DNM2,PSMF1,ROCK2,DSP,SEC24C,EGFR,SLC27A4,SEC24A,FABP5,GAB1,FLOT2,KIF3A,DCTN4,SEC…
GO: Biological Process	GO:0018209	peptidyl-serine modification	4.884e-07	56	148	ADRBK1,AKT1,AKT2,ARAF,RPS6KA4,ARRB1,ATM,BGN,BAK1,BAX,BCL2,CAMK2D,CAV1,PRKD2,CDC42,CD44,SPOCK2,AKT3,MAPK14,DCN,LRRK2,MAPKAPK2,INPP5K,PPM1F,MTOR,GALNT2,HCLS1,HK1,SPTBN4,ILK,MIF,PAK1,PAK2,MAMDC2,MAP2K2,MAPK13,PRKDC,PRKD1,MAPK1,PRKCA,PRKACA,PDK3,PIK3CA,TBK1,NTMT1,MAPK12,RPS6KA2,TGFBR2,PHIP,STK4,TAF1,DOCK7,SRC,TTBK2,MORC3,MAPKAPK3
GO: Biological Process	GO:1901293	nucleoside phosphate biosynthetic process	4.943e-07	101	317	ABCA1,ACACA,ADA,ADCY3,KYNU,ADK,ADSL,ADSS,ADSSL1,AK4,AK2,AK1,ALDOA,GMPS,AMPD3,PAPSS2,PAPSS1,AMPD2,APOE,APRT,ATP1A3,ATP1A1,ATP1A2,ATIC,ATP5C1,ATP5A1,ATP2B4,ATP2A3,ATP2A2,ATP2B1,ATP1B1,ATP5J,KMO,PPCDC,SLC25A13,CTPS1,DCTD,DGUOK,DUT,CECR1,AKAP12,DPYD,PTK2B,COASY,FLAD1,G6PD,CAP2,CAP1,GNAS,GNAI2,GNAI3,GART,GARS,GFPT1,GBAS,GUK1,GUCY1B3,ATP5L,AK3,PAICS,HPRT1,KARS,NADKD1,IMPDH2,IMPDH1,MTHFD1,CTPS2,MPI,NT5E…
GO: Biological Process	GO:0017038	protein import	5.309e-07	88	267	ADAR,PARP1,AGT,AKT1,MCM3AP,TIMM13,SAMM50,FZD1,AKR1C3,CDH1,CDK1,NCKIPSD,G3BP2,NOP58,SUFU,UBR5,MAPK14,NUTF2,NOLC1,DAB2,DAG1,IPO4,CYLD,RAB8B,NUP155,EMD,EGFR,CHP1,MTOR,TMEM173,FLNA,FAF1,RBPMS,TACC3,IPO11,GNAQ,NDUFA13,TXNIP,HTT,HCLS1,PDIA3,CHERP,IPO7,HSP90AB1,HSPA4,KPNA3,KPNA1,KPNB1,JUP,JAK2,SMAD3,SMAD4,LMNA,MAVS,TNPO1,IPO5,KPNA4,PRDX1,TOMM22,NF1,MED1,MAPK3,MAPK1,PPP3CA,PPP1R10,PEX14,PML,IPO9,PIK3R1,R…
GO: Biological Process	GO:0051049	regulation of transport	5.491e-07	317	1232	ABCA1,IQGAP1,ABR,NRP1,NAPA,SNAP23,RIPK1,ACTN4,ACTN2,ADA,ADD1,PARP1,ADRBK1,MTMR2,GAPVD1,AGT,AKT1,AK1,AHSG,AKT2,BIN1,ANK2,ANK3,ANPEP,SLC25A4,SLC25A5,SLC25A6,ANXA1,ANXA2,APOA4,APOA2,APOE,APOC3,APOC2,WASL,ARF6,ARRB1,ARRB2,ASPH,ATP1A1,PICALM,CLTCL1,BAK1,BAX,BCL2,FZD1,C5,CAMK2D,CAMK2G,KCNAB2,CALM3,CALR,CACNB3,CASK,CBL,CAV1,CASP1,RAE1,SPCS3,CD14,PEA15,CLIC4,CDH1,CDC42,AOC3,CDK1,CD74,ZFYVE16,SNX17,C2CD5,…
GO: Biological Process	GO:0009165	nucleotide biosynthetic process	5.749e-07	100	314	ABCA1,ACACA,ADA,ADCY3,KYNU,ADK,ADSL,ADSS,ADSSL1,AK4,AK2,AK1,ALDOA,GMPS,AMPD3,PAPSS2,PAPSS1,AMPD2,APOE,APRT,ATP1A3,ATP1A1,ATP1A2,ATIC,ATP5C1,ATP5A1,ATP2B4,ATP2A3,ATP2A2,ATP2B1,ATP1B1,ATP5J,KMO,PPCDC,SLC25A13,CTPS1,DCTD,DGUOK,DUT,AKAP12,DPYD,PTK2B,COASY,FLAD1,G6PD,CAP2,CAP1,GNAS,GNAI2,GNAI3,GART,GARS,GFPT1,GBAS,GUK1,GUCY1B3,ATP5L,AK3,PAICS,HPRT1,KARS,NADKD1,IMPDH2,IMPDH1,MTHFD1,CTPS2,MPI,NT5E,OAS2,…
GO: Biological Process	GO:0051260	protein homooligomerization	6.542e-07	83	249	ACACA,ACADM,ACADS,ACADL,ACAT1,RIPK1,ACTN2,ALDH1A1,ALAD,ALDOC,ALDOA,SPAG9,ANXA5,APAF1,BID,BAX,CAV1,CAT,PNPT1,ATL3,CDH1,CDA,EVL,CUTA,CLU,CPT1A,DNM1L,CRYZ,CRYAB,LONP1,DECR1,TOR1A,DPYSL3,STOM,FBP1,EHD1,APOA1BP,SCUBE1,GLS,CRBN,DCXR,GNB2L1,GLUL,ATL1,FIS1,GFPT1,GPHN,HSD17B10,AK3,GNMT,HPRT1,HMOX1,TOR1B,TOR2A,IDE,IMPDH2,MGST1,MIF,SMARCAD1,PCBD1,GOPC,PPAT,ATL2,PEX14,PFKM,PFKP,PFKL,SRR,PEX5,SHMT1,SHMT2,TGM2…
GO: Biological Process	GO:0042327	positive regulation of phosphorylation	6.548e-07	178	633	IQGAP1,NRP1,ACADVL,RIPK1,ADCY3,ADD1,ADRBK2,AGT,AKT1,SQSTM1,AIF1,AKT2,SPAG9,ARAF,RPS6KA4,ARRB1,ARRB2,ATP6V0D1,BCL2,FZD1,C5,CALR,CAV1,SPDYA,LAMTOR3,PRKD2,CDC42,CDK1,CD81,CD74,CD44,CHI3L1,PTPLAD1,CUL7,CCR1,TPP1,ABI1,CRK,RAD50,TAOK3,PDIA6,MAPK14,CSNK2B,CSPG4,CSK,VAPB,DCTN1,LRRK2,MAPKAPK2,DAB2,DLG1,CAB39,GOSR2,EGFR,EIF2S1,PTK2B,ACSL1,PDIA5,MALT1,ERBB2,EXTL3,F2,PDCD10,MTOR,MAP4K5,GAB1,RBPMS,TAB1,GNB2L1…
GO: Biological Process	GO:0007093	mitotic cell cycle checkpoint	8.102e-07	56	150	CRADD,CDC16,NAE1,BUB3,ZW10,ATM,TRRAP,CDC23,CDK2,CDK1,CDKN1B,PSMD6,PSMD14,CSNK2A2,PSME3,DLG1,PSMF1,DYNC1LI1,RPS27L,ANAPC1,NBN,ANAPC4,PML,PCID2,PSMC5,PSMC4,PSMD1,PSMC6,PSMD3,PSMD2,PSMB8,PSMB9,PSMC2,PSMC1,PSME1,PSME2,PSMD7,PSMD11,PSMD12,PSMB6,PSMB7,PSMB4,PSMB5,PSMB2,PSMB3,PSMA7,PSMB1,PSMA5,PSMA3,PSMA4,PSMA1,PURA,RPS27A,TOP2A,TOP2B,PSME4
GO: Biological Process	GO:0033674	positive regulation of kinase activity	8.347e-07	138	469	IQGAP1,ACADVL,RIPK1,ADCY3,ADD1,AGT,AKT1,SPAG9,ARAF,ARRB1,ATP6V0D1,C5,CALR,SPDYA,LAMTOR3,CDC42,CDK1,CD81,CD74,CHI3L1,PTPLAD1,CUL7,CCR1,TPP1,ABI1,CRK,RAD50,TAOK3,PDIA6,MAPK14,CSPG4,CSK,VAPB,DCTN1,LRRK2,MAPKAPK2,DAB2,DLG1,CAB39,GOSR2,EGFR,EIF2S1,PTK2B,ACSL1,PDIA5,FGR,MALT1,ERBB2,EXTL3,PDCD10,MAP4K5,GAB1,TAB1,VAV3,GNAI2,GFPT1,NCKAP1L,CAMKK2,HYOU1,RAPGEF1,SRPRB,HSP90AB1,HSPA5,IGHM,ZP4,JAK2,SLC27A1,ITG…
GO: Biological Process	GO:0006633	fatty acid biosynthetic process	8.567e-07	59	161	ACACA,ACADL,ACADVL,AGT,EIF2B2,EIF2B4,ALOX15,ALOX5,ANXA1,APOA4,APOC3,APOC2,BHMT,DEGS1,CD74,PTPLAD1,QKI,EIF2B1,FASN,ACSL3,PTGES2,GOT1,MECR,APIP,PTGES3,MCAT,HPGDS,PTPLAD2,MGLL,LTA4H,FADS1,MTHFD1,MTHFR,MTAP,MTR,MGST2,MIF,MYO5A,MAPK9,PRKAG1,PRKAA1,PRKAB2,PRKAB1,ACSF3,ACSS2,RNPEP,PTGS1,PTGIS,PTGDS,SLC1A3,ACSM3,TBXAS1,THNSL2,ADI1,SYK,ACSS1,NR1H2,MLYCD,MRI1
GO: Biological Process	GO:0032075	positive regulation of nuclease activity	8.674e-07	31	66	ACADVL,ADD1,ATP6V0D1,CALR,CUL7,TPP1,PDIA6,VAPB,DCTN1,GOSR2,EIF2S1,PDIA5,EXTL3,GFPT1,HYOU1,SRPRB,HSPA5,HMGB2,LMNA,PCNA,DNAJC3,ARFGAP1,C19orf10,SHC1,TLN1,SRPR,SEC31A,WFS1,HSP90B1,CXXC1,SYVN1
GO: Biological Process	GO:0022008	neurogenesis	9.509e-07	324	1270	NRP1,NRP2,NAPA,ACTG1,AP2B1,MTMR2,AP2A2,AP2A1,AGT,AKT1,ARHGEF7,EIF2B2,EIF2B5,EIF2B4,EIF2B3,ALCAM,AKT2,PHGDH,ALDH1A2,ANK2,SPAG9,ANK3,ANXA1,APOE,WASL,ARF6,RPS6KA4,ARL3,DCLK1,ARHGAP4,ARHGDIA,RHOG,RHOB,ARHGEF2,ARHGEF1,AIFM1,BAG1,PICALM,ATXN10,BAX,BCL2,STK24,NCK2,DST,FZD1,CALR,CACNB3,GIGYF2,CAV1,NUMB,CD9,CDK6,CDH11,CDH1,CDC42,CDK1,CD44,EVL,CHN1,ARHGEF11,FIG4,PIGT,CNP,COL1A1,CNTN1,AP2M1,CLU,SUFU,CLTA,CL…
GO: Biological Process	GO:0006734	NADH metabolic process	9.872e-07	10	11	DLST,GPD2,GPD1,IDH3G,IDH3B,IDH3A,MDH1,MDH2,OGDH,GPD1L
GO: Biological Process	GO:0080134	regulation of response to stress	1.02e-06	217	803	A2M,ABR,ACP5,RIPK1,ADA,AP1M1,AP1S2,AP2B1,AP1B1,AP2A2,AP2A1,AP1G1,AGT,AKT1,AHSG,AKT2,AMBP,SPAG9,SLC25A6,ANXA1,ANXA2,APOE,APEX1,ARF6,ARRB2,ATM,SERPINC1,BAK1,BAX,BTK,STK24,C2,C1QBP,SERPING1,C6,C4BPA,CASK,PIAS1,LSM14A,CAV1,CASP8,PNPT1,CD14,CDK6,SAMHD1,SIN3A,CDC42,AOC3,CDK1,CD74,CD44,CD59,BCLAF1,PTPLAD1,CDK9,ELMO1,BRCC3,CCR1,ATP6V1H,AP2M1,CPB2,TAOK3,TRIM28,UBR5,MAPK14,TNFAIP8L2,DDX5,MAPKAPK2,DAB2,TRIP…
GO: Biological Process	GO:0010035	response to inorganic substance	1.065e-06	97	306	IQGAP1,ACADM,ACO1,ACTG1,ALB,ALAD,GGH,ANXA11,ANXA7,APOB,ASPH,BAG1,BDH1,BCL2,CA2,CALM3,CALR,CAV1,CASP8,AKR1C3,CD9,CDK2,SLC25A12,CLIC4,CDH1,CDK1,CDKN1B,CUTA,CPOX,CP,PDCD6,ABCB6,SLC25A13,CTNNB1,CYP11A1,DPEP1,EGFR,FBP1,PTK2B,FECH,FGG,FGB,FGA,NDRG1,COL18A1,GART,GDI1,GATM,TXNIP,HTT,GPX1,TXNRD2,GSN,GSS,HMOX1,HMBS,ICAM1,IMPA1,LTA4H,KRT10,MAP1B,MAOB,MNAT1,NPC1,PEBP1,PCNA,NCAM1,NEDD4,NFATC3,SLC30A5,NFKB1,MA…
GO: Biological Process	GO:0006518	peptide metabolic process	1.089e-06	41	99	GSTK1,MRPS35,SPCS3,TPP1,GGCT,CTSH,DMD,ECE1,DPEP1,TMED10,G6PD,GLO1,GCLC,CPQ,GSTZ1,GSTT1,GSTP1,GSTM3,GSTM1,HAGH,GPX1,GSS,GSTA4,IDH1,IDE,LTA4H,LNPEP,MGST2,MGST3,MGST1,MME,MRPS9,CNDP2,SEC11C,SOD1,THOP1,XPNPEP1,NCSTN,DNPEP,ALDH5A1,PGLYRP2
GO: Biological Process	GO:0048207	vesicle targeting, rough ER to cis-Golgi	1.093e-06	12	15	CUL3,SEC16A,SEC24D,SEC24C,TMED10,TMED2,SEC24A,SEC23A,SAR1B,SEC24B,SEC13,SEC31A
GO: Biological Process	GO:0048208	COPII vesicle coating	1.093e-06	12	15	CUL3,SEC16A,SEC24D,SEC24C,TMED10,TMED2,SEC24A,SEC23A,SAR1B,SEC24B,SEC13,SEC31A
GO: Biological Process	GO:0046040	IMP metabolic process	1.147e-06	11	13	ADSL,ADSS,AMPD3,AMPD2,ATIC,GART,PAICS,HPRT1,PPAT,PFAS,NT5C2
GO: Biological Process	GO:0048200	Golgi transport vesicle coating	1.147e-06	11	13	GBF1,ARCN1,COPA,COPB1,COPB2,TMED10,TMED2,COPE,ARFGAP1,TMED9,COPG1
GO: Biological Process	GO:0048205	COPI coating of Golgi vesicle	1.147e-06	11	13	GBF1,ARCN1,COPA,COPB1,COPB2,TMED10,TMED2,COPE,ARFGAP1,TMED9,COPG1
GO: Biological Process	GO:0035964	COPI-coated vesicle budding	1.147e-06	11	13	GBF1,ARCN1,COPA,COPB1,COPB2,TMED10,TMED2,COPE,ARFGAP1,TMED9,COPG1
GO: Biological Process	GO:0051347	positive regulation of transferase activity	1.194e-06	140	480	IQGAP1,ACADVL,RIPK1,ADCY3,ADD1,AGT,AKT1,SPAG9,ARAF,ARRB1,ATP6V0D1,C5,CALR,SPDYA,LAMTOR3,POT1,CDC42,CDK1,CD81,CD74,CHI3L1,PTPLAD1,CUL7,CCR1,TPP1,ABI1,CRK,RAD50,TAOK3,PDIA6,MAPK14,CSPG4,CSK,VAPB,DCTN1,LRRK2,MAPKAPK2,DAB2,DLG1,CAB39,GOSR2,EGFR,EIF2S1,PTK2B,ACSL1,PDIA5,FGR,MALT1,ERBB2,EXTL3,PDCD10,MAP4K5,GAB1,TAB1,VAV3,GNAI2,GFPT1,NCKAP1L,CAMKK2,HYOU1,RAPGEF1,SRPRB,HSP90AB1,HSPA5,IGHM,ZP4,JAK2,SLC27A…
GO: Biological Process	GO:0035967	cellular response to topologically incorrect protein	1.356e-06	39	93	AARS,ACADVL,ADD1,ATP6V0D1,BAK1,BAX,CALR,DERL1,CUL7,TPP1,HDAC6,PDIA6,VAPB,DCTN1,GOSR2,EIF2S1,PDIA5,EXTL3,DERL2,GFPT1,STUB1,HYOU1,SRPRB,HSPA5,LMNA,ERO1L,DNAJC3,ARFGAP1,C19orf10,PTPN1,SHC1,TLN1,SRPR,SEC31A,WFS1,VCP,HSP90B1,CXXC1,SYVN1
GO: Biological Process	GO:0009067	aspartate family amino acid biosynthetic process	1.435e-06	15	22	EIF2B2,EIF2B4,BHMT,EIF2B1,THNSL1,GOT2,GOT1,APIP,MTHFD1,MTHFR,MTAP,MTR,THNSL2,ADI1,MRI1
GO: Biological Process	GO:0006140	regulation of nucleotide metabolic process	1.441e-06	124	416	ARFGAP3,ABCA1,IQGAP1,ADCY3,ARHGEF7,ALDH1A1,AKT2,BIN1,APOE,ARRB1,ARRB2,ARHGAP6,ARHGAP5,ARHGAP4,ARHGAP1,RHOG,RGN,RAB3GAP2,PIP5K1A,TBC1D10B,PKP4,RIC8A,CDA,TBC1D5,DOCK4,PTPLAD1,CHN1,ACAP1,GIT2,CNN3,TBC1D4,CRK,DNAJB6,SNX9,LRRK2,TBC1D17,ARHGEF6,AKAP12,DOCK1,ARHGEF10,PTK2B,TMED2,ERBB2,EPHB3,MTOR,FGD3,ADAP1,VAV3,CDC42EP2,CAP2,CAP1,GNB2L1,GNAQ,GNAS,GNAI2,GNAI3,NCKAP1L,AGRN,ARFGEF1,ASAP1,AHSA1,ARHGAP35,AGF…
GO: Biological Process	GO:0043242	negative regulation of protein complex disassembly	1.482e-06	26	52	ADD1,ARHGEF2,CAPG,CAPZA1,CAPZA2,CAPZB,EVL,LIMA1,HDAC6,TRIOBP,GSN,SPTBN4,MAP1B,MAP1A,MTPN,TMOD3,RDX,TWF1,SPTB,SPTBN1,SPTA1,SPTAN1,SPTBN2,SCIN,TPM1,CLASP1
GO: Biological Process	GO:0046364	monosaccharide biosynthetic process	1.554e-06	34	77	ACADM,ALDOC,ALDOA,RGN,SLC25A11,SLC25A12,GNPDA1,SLC25A13,ENO2,FBP1,G6PD,GOT2,GOT1,AKR1A1,GPD2,GPI,GPD1,GNMT,MDH1,MDH2,PCK2,PC,SMEK2,PRKACG,PRKACB,PRKACA,PGD,PGAM1,SMEK1,PMM2,SLC25A1,SORD,TKT,TALDO1
GO: Biological Process	GO:0030968	endoplasmic reticulum unfolded protein response	1.671e-06	37	87	AARS,ACADVL,ADD1,ATP6V0D1,BAK1,BAX,CALR,DERL1,CUL7,TPP1,PDIA6,VAPB,DCTN1,GOSR2,EIF2S1,PDIA5,EXTL3,DERL2,GFPT1,HYOU1,SRPRB,HSPA5,LMNA,ERO1L,DNAJC3,ARFGAP1,C19orf10,PTPN1,SHC1,TLN1,SRPR,SEC31A,WFS1,VCP,HSP90B1,CXXC1,SYVN1
GO: Biological Process	GO:0046777	protein autophosphorylation	1.718e-06	69	201	RIPK1,AKT1,ATM,BTK,STK24,CAMK2D,CAMK2G,PRKD2,SLK,RAD50,TAOK3,TRIM28,MAPK14,CSNK1G3,CSK,LRRK2,DAPK3,EGFR,EIF2S1,PTK2B,FGR,FER,FES,ERBB2,EPHB3,EPHB4,CHP1,MTOR,HCK,CAMKK2,GRK5,HTATIP2,HK1,RAP2C,JAK2,JAK1,LYN,MRE11A,WNK1,PAK1,PAK2,NBN,EEF2K,NME2,MAP2K2,PRKD1,MAPK3,PRKCA,PRKACA,PPP2R5D,PPP2CA,ENPP1,PDGFRB,PDGFRA,PDPK1,PHKA1,RAP2B,RAP2A,PTK2,PTPRC,STK10,STK4,TAF1,SYK,SRC,AAK1,YES1,VRK1,CSNK1G1
GO: Biological Process	GO:1901137	carbohydrate derivative biosynthetic process	1.749e-06	194	710	DPM1,ABCA1,ACACA,ADA,ADCY3,PARP1,ADK,ADSL,ADSS,ADSSL1,AK2,AK1,B3GAT3,ALDOA,GMPS,AMPD3,PAPSS2,PAPSS1,AMPD2,APOE,APRT,AATF,ATP1A3,ATP1A1,ATP1A2,ATIC,ATP5C1,ATP5A1,ATP2B4,ATP2A3,ATP2A2,ATP2B1,ATP1B1,ATP5J,BGN,BCL2,CANX,CALR,GLCE,PPCDC,CDA,MLEC,STT3B,PIGT,SEC24D,PARP3,PARP2,PIGK,SLC25A13,CTPS1,CTNNB1,ALG12,ALG3,VCAN,CSPG4,DCN,DCTD,DDOST,DAD1,QTRTD1,COLGALT1,ALG9,ITM2B,TYMP,MPDU1,DUT,CECR1,AKAP12,DPYD…
GO: Biological Process	GO:0051261	protein depolymerization	1.811e-06	32	71	ADD1,ARHGEF2,CAPG,CAPZA1,CAPZA2,CAPZB,EVL,LIMA1,NEDD1,CFL2,HDAC6,TRPV4,TRIOBP,GSN,SPTBN4,STMN1,MAP1B,MAP1A,MTPN,MICAL1,TMOD3,PLEK,RDX,TWF1,SPTB,SPTBN1,SPTA1,SPTAN1,SPTBN2,SCIN,TPM1,CLASP1
GO: Biological Process	GO:0006354	DNA-dependent transcription, elongation	1.869e-06	44	111	IKBKAP,POLR1A,NELFB,NELFCD,CDK9,THOC1,DAB2,POLR1C,CTR9,CDC73,WDR61,SUPT16H,POLR3A,ADRM1,GTF2B,GTF2F2,GTF2E1,GTF2E2,HTATSF1,KIAA1967,MNAT1,NCBP1,POLR2C,POLR2E,POLR2G,POLR2H,POLR2A,POLR2B,MAP2K1,ZNF326,POLR3E,PAF1,TCEB1,ELP2,SUPT6H,SUPT5H,TAF1,ELP3,SSRP1,NELFA,UBTF,BRD4,POLR1B,NELFE
GO: Biological Process	GO:0006103	2-oxoglutarate metabolic process	2.009e-06	14	20	DLD,DLST,GOT2,GOT1,IDH3G,IDH3B,IDH3A,IDH2,IDH1,OGDH,CCBL2,D2HGDH,STAT5A,ADHFE1
GO: Biological Process	GO:0000413	protein peptidyl-prolyl isomerization	2.009e-06	14	20	FKBP10,FKBP7,PPIF,PPIG,FKBP4,FKBP5,FKBP3,FKBP2,PPIE,PPIH,FKBP9,PPIB,PIN1,FKBP8
GO: Biological Process	GO:0019674	NAD metabolic process	2.033e-06	18	30	KYNU,KMO,DLST,GPD2,GPD1,IDH3G,IDH3B,IDH3A,NADKD1,LDHA,NUDT12,MDH1,MDH2,OGDH,QPRT,HAAO,GPD1L,NAPRT1
GO: Biological Process	GO:0034097	response to cytokine stimulus	2.093e-06	161	572	SERPINA3,ACP5,RIPK1,ADAM10,ADAR,TRADD,KYNU,AIF1,ALAD,ALDH1A2,ANXA1,APOB,RPS6KA4,ARIH1,BCL2,CAMK2D,CAMK2G,PIAS1,LSM14A,CAV1,RAE1,CASP8,PNPT1,CD14,CD74,CD44,EIF4A3,CHI3L1,CDK9,NUPL1,CCR1,CNTFR,NUP153,NUP35,COL3A1,CTNNB1,NUP37,CTSB,CSNK2B,DDX41,UBE2L6,DDOST,DAPK3,CYP11A1,CYP17A1,INPP5K,ECM1,DPYSL3,NUP155,ENDOG,CTR9,EIF4G1,EIF4G2,NUP93,FASN,PTK2B,ACSL1,ACSL4,FER,EPRS,NUP50,CORO1A,CDC37,TMEM173,GAB1,F…
GO: Biological Process	GO:1900542	regulation of purine nucleotide metabolic process	2.199e-06	122	411	ARFGAP3,ABCA1,IQGAP1,ADCY3,ARHGEF7,ALDH1A1,AKT2,BIN1,APOE,ARRB1,ARRB2,ARHGAP6,ARHGAP5,ARHGAP4,ARHGAP1,RHOG,RGN,RAB3GAP2,PIP5K1A,TBC1D10B,PKP4,RIC8A,TBC1D5,DOCK4,PTPLAD1,CHN1,ACAP1,GIT2,CNN3,TBC1D4,CRK,DNAJB6,SNX9,LRRK2,TBC1D17,ARHGEF6,AKAP12,DOCK1,ARHGEF10,PTK2B,TMED2,ERBB2,EPHB3,MTOR,FGD3,ADAP1,VAV3,CDC42EP2,CAP2,CAP1,GNB2L1,GNAQ,GNAS,GNAI2,GNAI3,NCKAP1L,AGRN,ARFGEF1,ASAP1,AHSA1,ARHGAP35,AGFG1,P…
GO: Biological Process	GO:0061025	membrane fusion	2.277e-06	40	98	VPS33B,NAPG,NAPA,SNAP23,ANXA7,ANXA1,ANXA2,RABEP1,DYSF,BAK1,BAX,TECPR1,EEA1,STX7,WIPI2,CD9,STX11,USO1,C2CD5,MFN2,GOSR2,AFG3L2,VCPIP1,CHP1,VAV3,VAT1,GNAI3,GM2A,ATG7,ITGA3,RAB8A,NSF,OPA1,SERPINA5,NPLOC4,MFN1,NSFL1C,PVRL2,PID1,OMA1
GO: Biological Process	GO:1901606	alpha-amino acid catabolic process	2.326e-06	37	88	HIBCH,KYNU,ASL,ALDH7A1,BCAT2,KMO,CCBL1,ALDH4A1,CSAD,DLD,DLST,SARDH,FAH,ASRGL1,GLS,GOT2,GOT1,GLUL,GCDH,GSTZ1,HMGCL,IVD,DTD2,ACAD8,ALDH6A1,MCCC1,OGDH,PCBD1,MCCC2,PPAT,QDPR,CCBL2,SHMT1,DDAH1,DDAH2,PDPR,HAAO
GO: Biological Process	GO:0034620	cellular response to unfolded protein	2.326e-06	37	88	AARS,ACADVL,ADD1,ATP6V0D1,BAK1,BAX,CALR,DERL1,CUL7,TPP1,PDIA6,VAPB,DCTN1,GOSR2,EIF2S1,PDIA5,EXTL3,DERL2,GFPT1,HYOU1,SRPRB,HSPA5,LMNA,ERO1L,DNAJC3,ARFGAP1,C19orf10,PTPN1,SHC1,TLN1,SRPR,SEC31A,WFS1,VCP,HSP90B1,CXXC1,SYVN1
GO: Biological Process	GO:0006112	energy reserve metabolic process	2.492e-06	61	173	IQGAP1,ACACA,ACADM,ADCY3,AGL,AKT1,AKT2,SLC25A4,SLC25A5,SLC25A6,CALM3,SPCS3,INPP5K,FASN,GNB4,MTOR,GAA,GNAS,GNB1,GNB2,GFPT1,GBE1,GYS1,GYG1,PTGES3,SORBS1,AGPAT1,GNMT,IL6ST,ITPR2,ITPR1,MARCKS,LEPR,PPP1CC,PPP1CA,PRKAR1A,PRKACG,PRKCA,PRKAR2A,PRKAR2B,PRKAB2,PRKACB,PRKACA,PPP1R2,PGM5,PGM1,ENPP1,PHKA1,RAP1B,RAP1A,SEC11C,PYGB,PYGL,PYGM,SLC2A1,PID1,TKT,STXBP1,PGM2,TALDO1,UGP2
GO: Biological Process	GO:0032069	regulation of nuclease activity	2.633e-06	32	72	ACADVL,ADD1,ATP6V0D1,CALR,CUL7,TPP1,PDIA6,VAPB,DCTN1,GOSR2,EIF2S1,PDIA5,EXTL3,GFPT1,HYOU1,SRPRB,HSPA5,HMGB2,LMNA,OAS1,PCNA,DNAJC3,ARFGAP1,C19orf10,SHC1,TLN1,SRPR,SEC31A,WFS1,HSP90B1,CXXC1,SYVN1
GO: Biological Process	GO:0006413	translational initiation	2.701e-06	59	166	ABCF1,EIF2B2,EIF2B5,EIF2S2,EIF2B4,EIF2B3,EIF3I,EIF3J,EIF3D,EIF3F,EIF3G,EIF3H,EIF3B,EIF4A3,TRMT6,DDX3X,DDX1,EIF4B,EIF2S3,EIF4G1,EIF4G2,EIF5,EIF5B,EIF2S1,EIF2B1,EIF2D,COPS5,FECH,FMR1,EIF3M,EIF1B,PAIP1,EIF3K,EIF3E,PABPC1,EIF4ENIF1,EIF2A,NCBP1,RPL10A,RPL10,RPL19,DHX29,RPS5,RPS9,RPS12,RPS10,RPLP1,RPS4X,RPS3A,RPS3,RPLP0,RPL22,RPS21,RPS27A,RPS15,RPS15A,RPS19,RPS16,EIF4H
GO: Biological Process	GO:0046365	monosaccharide catabolic process	2.726e-06	41	102	ALDOC,ALDOA,PGLS,H6PD,NCOR1,ENO2,FBP1,G6PD,FUT8,NUDT5,HIBADH,GLB1,AKR1A1,GALT,GALE,GALK1,GPI,HK2,HK1,HK3,DHDH,LDHA,MIF,LDHAL6A,OGDH,ADPGK,RBKS,PRKAG1,PRKAA1,PGD,PGAM1,PGM5,PGM1,PFKM,PFKP,PFKL,PDHB,OGDHL,TKT,TALDO1,GLYR1
GO: Biological Process	GO:0009605	response to external stimulus	2.728e-06	343	1369	A2M,ABR,NRP1,NRP2,ACAA1,ACADM,ACADS,ACAT1,ACP5,ACTG1,CRADD,ADAM10,ADA,KYNU,ADSL,AP2B1,AP2A2,AP2A1,AGL,AGT,AKT1,SQSTM1,AHSG,AIF1,ALB,ALCAM,AKT2,ALAD,ALPL,ALDH1A2,ALOX5,ANK2,ANK3,ANXA1,ANXA2,APOE,WASL,RPS6KA4,ARSA,ARSB,ARRB1,ARRB2,RHOG,RHOB,ATP1A1,ATP1A2,SERPINC1,USP14,UNC119,BDH1,BAK1,TXN2,BCKDHB,BCL2,TECPR1,PIP5K1A,STK24,NCK2,GNPAT,FZD1,C2,C1QBP,SERPING1,C6,C4BPA,C5,HAT1,CALR,CACNB3,CASK,WIPI2,CA…
GO: Biological Process	GO:0031589	cell-substrate adhesion	2.837e-06	77	234	ACTN1,ACTN2,SGCE,AGT,ARHGAP6,BCL2,PIP5K1A,C1QBP,CALR,CASK,CDK6,CD44,C22orf28,SPOCK2,COL1A1,ARPC2,COL3A1,SORBS3,CTNNB1,DAB2,DAG1,ROCK2,PPM1F,PTK2B,FER,PLEKHA2,EPHB3,CORO1A,EMILIN1,FN1,TRIOBP,SORBS1,FBLN5,HRG,JAK2,ITGB2,ITGB5,EPB41L5,ITGAV,ITGA1,ITGA3,ITGA5,ITGA6,ILK,SMAD3,BCAM,LGALS1,LAMC1,LAMB1,RAPH1,MMP14,NF1,NF2,NID1,PARVG,PDPK1,PARVA,PLG,PIK3R1,RASA1,ROCK1,PTK2,RAC1,SIGLEC1,EPDR1,THY1,THBS1,TN…
GO: Biological Process	GO:0043244	regulation of protein complex disassembly	2.84e-06	31	69	ADD1,ARHGEF2,CAPG,CAPZA1,CAPZA2,CAPZB,EVL,LIMA1,HDAC6,TRPV4,ETF1,TRIOBP,MGEA5,GSN,SPTBN4,MAP1B,MAP1A,MTPN,TMOD3,PLEK,UPF1,RDX,TWF1,SPTB,SPTBN1,SPTA1,SPTAN1,SPTBN2,SCIN,TPM1,CLASP1
GO: Biological Process	GO:0090068	positive regulation of cell cycle process	2.895e-06	60	170	CRADD,AIF1,APEX1,ATM,CUL4B,CUL4A,PKP4,CDK2,CDC42,SH2B1,CDKN1B,PSMD6,CRLF3,PSMD14,PSME3,DDX3X,PSMF1,NUDT16,MYBBP1A,MTA3,PEBP1,MED1,PKN2,PRKACA,PDGFRB,PML,RANBP1,PSMC5,PSMC4,PSMD1,PSMC6,PSMD3,PSMD2,PSMB8,PSMB9,PSMC2,PSMC1,PSME1,PSME2,PSMD7,PSMD11,PSMD12,PSMB6,PSMB7,PSMB4,PSMB5,PSMB2,PSMB3,PSMA7,PSMB1,PSMA5,PSMA3,PSMA4,PSMA1,RPS27A,PHIP,UHRF2,BRD4,PSME4,PLCB1
GO: Biological Process	GO:1900117	regulation of execution phase of apoptosis	2.899e-06	72	215	RIPK1,CRADD,FAM162A,TRADD,MBD4,AKT1,APAF1,ATM,AIFM1,SART1,BID,BAK1,BAX,BCL2,BTK,STK24,CUL4A,CUL3,CUL2,CUL1,CAV1,CASP7,CASP8,BCLAF1,CLU,PDCD6,DNM1L,GGCT,DDX5,DDX3X,DAPK3,CYLD,PPM1F,GNB2L1,SH3GLB1,NDUFA13,RPS27L,FIS1,MSH6,HTT,GPX1,MYBBP1A,HMOX1,UBE2K,HTRA2,IFI16,JAK2,ITPR1,PARK7,SMAD3,MSH2,MAP3K5,MLH1,OPA1,ERO1L,PAK2,MAPK9,PRKCA,PPP2R1B,ZNF622,PML,DPF2,PYCARD,DAB2IP,DNAJC10,SORT1,SRC,UACA,VDAC2,CUL…
GO: Biological Process	GO:0097190	apoptotic signaling pathway	2.899e-06	72	215	RIPK1,CRADD,FAM162A,TRADD,MBD4,AKT1,APAF1,ATM,AIFM1,SART1,BID,BAK1,BAX,BCL2,BTK,STK24,CUL4A,CUL3,CUL2,CUL1,CAV1,CASP7,CASP8,BCLAF1,CLU,PDCD6,DNM1L,GGCT,DDX5,DDX3X,DAPK3,CYLD,PPM1F,GNB2L1,SH3GLB1,NDUFA13,RPS27L,FIS1,MSH6,HTT,GPX1,MYBBP1A,HMOX1,UBE2K,HTRA2,IFI16,JAK2,ITPR1,PARK7,SMAD3,MSH2,MAP3K5,MLH1,OPA1,ERO1L,PAK2,MAPK9,PRKCA,PPP2R1B,ZNF622,PML,DPF2,PYCARD,DAB2IP,DNAJC10,SORT1,SRC,UACA,VDAC2,CUL…
GO: Biological Process	GO:0006026	aminoglycan catabolic process	3.042e-06	30	66	ARSB,BGN,CD44,CHI3L1,CHIT1,CTBS,VCAN,CSPG4,DCN,GPC4,FUCA1,FMOD,GLB1,GNS,GALNS,GUSB,AGRN,GPC1,HEXA,HEXB,IDS,HSPG2,LUM,OMD,OGN,NAGLU,CHID1,PRELP,SGSH,PGLYRP2
GO: Biological Process	GO:0006650	glycerophospholipid metabolic process	3.066e-06	80	246	DPM1,MTMR1,MTMR2,APOA4,APOA2,ATM,MTMR6,PIP5K1A,GNPAT,DGAT1,PLA2G4C,CD81,IP6K1,CETP,FIG4,PIGT,LPGAT1,PIGK,ALG12,ALG9,PCYT1B,INPP5K,ACSL3,PNPLA6,FABP5,PLBD1,LPCAT1,BPNT1,ABHD5,SH3GLB1,CDIPT,HADHB,HADHA,GPD1,AGPAT1,SLC27A1,INPPL1,INPP5B,INPP5A,MGLL,INPP4A,INPP1,IMPA1,MTM1,MECP2,OCRL,AGPAT3,SLC44A2,PON1,PDGFRB,ENPP2,SMPD4,PCYT1A,VAC14,PLEK,PLD1,PLCG2,PLD2,PIK3C2A,PIK3CA,PIK3C3,PIK3R1,PI4KA,PIP4K2A,MT…
GO: Biological Process	GO:0008645	hexose transport	3.227e-06	48	127	AKT1,AK1,AKT2,CLTCL1,RAE1,PEA15,AOC3,C2CD5,NUPL1,NUP153,NUP35,NUP37,ASPSCR1,INPP5K,NUP155,NUP93,FABP5,NUP50,NUPL2,NUP85,MGEA5,SORBS1,HK2,HK1,HK3,M6PR,MIF,NUP88,NUP107,PRKCA,PRKCB,PRKAA1,ITLN1,ENPP1,PIK3R1,NUP133,SEH1L,PTPN11,SLC2A1,SORT1,PID1,STXBP3,YES1,NUP54,NUP214,NUP205,NUP210,NUP160
GO: Biological Process	GO:0061077	chaperone-mediated protein folding	3.353e-06	15	23	BAG1,CD74,CLU,TOR1A,HSPH1,PTGES3,HSPA8,TOR1B,TOR2A,DNAJB1,CHORDC1,ERO1L,TOR3A,UNC45A,ST13
GO: Biological Process	GO:0030032	lamellipodium assembly	3.516e-06	22	42	ARHGEF7,NCK2,CAPZB,SH2B1,ACTR3,WASF2,ARHGEF6,FER,NCKAP1,MTOR,NUP85,VAV3,HRG,SPATA13,NCK1,PARVB,RAC1,SSH1,SSH3,VCL,SRGAP2,CYFIP1
GO: Biological Process	GO:0009086	methionine biosynthetic process	3.564e-06	12	16	EIF2B2,EIF2B4,BHMT,EIF2B1,GOT1,APIP,MTHFD1,MTHFR,MTAP,MTR,ADI1,MRI1
GO: Biological Process	GO:0090114	COPII-coated vesicle budding	3.564e-06	12	16	CUL3,SEC16A,SEC24D,SEC24C,TMED10,TMED2,SEC24A,SEC23A,SAR1B,SEC24B,SEC13,SEC31A
GO: Biological Process	GO:0045937	positive regulation of phosphate metabolic process	4.08e-06	192	710	ABCA1,IQGAP1,NRP1,ACADVL,RIPK1,ADCY3,ADD1,ADRBK2,AGT,AKT1,SQSTM1,AIF1,AKT2,SPAG9,APOE,APOC2,ARAF,RPS6KA4,ARRB1,ARRB2,ATP6V0D1,BCL2,FZD1,C5,CALR,CAV1,SPDYA,LAMTOR3,PRKD2,CDC42,CDK1,CD81,CD74,CD44,CHI3L1,PTPLAD1,CUL7,CCR1,TPP1,ABI1,CRK,RAD50,TAOK3,PDIA6,MAPK14,CSNK2B,CSPG4,CSK,VAPB,DCTN1,LRRK2,MAPKAPK2,DAB2,DLG1,CAB39,AKAP12,GOSR2,ARHGEF10,EGFR,EIF2S1,PTK2B,ACSL3,ACSL1,PDIA5,MALT1,ERBB2,EXTL3,F2,PD…
GO: Biological Process	GO:0010562	positive regulation of phosphorus metabolic process	4.08e-06	192	710	ABCA1,IQGAP1,NRP1,ACADVL,RIPK1,ADCY3,ADD1,ADRBK2,AGT,AKT1,SQSTM1,AIF1,AKT2,SPAG9,APOE,APOC2,ARAF,RPS6KA4,ARRB1,ARRB2,ATP6V0D1,BCL2,FZD1,C5,CALR,CAV1,SPDYA,LAMTOR3,PRKD2,CDC42,CDK1,CD81,CD74,CD44,CHI3L1,PTPLAD1,CUL7,CCR1,TPP1,ABI1,CRK,RAD50,TAOK3,PDIA6,MAPK14,CSNK2B,CSPG4,CSK,VAPB,DCTN1,LRRK2,MAPKAPK2,DAB2,DLG1,CAB39,AKAP12,GOSR2,ARHGEF10,EGFR,EIF2S1,PTK2B,ACSL3,ACSL1,PDIA5,MALT1,ERBB2,EXTL3,F2,PD…
GO: Biological Process	GO:0007346	regulation of mitotic cell cycle	4.322e-06	104	343	CRADD,AIF1,CDC16,NAE1,APEX1,AATF,BUB3,ZW10,ATM,TRRAP,BID,BCL2,CAMK2D,CUL4B,CUL4A,NEK7,CDC23,CDK2,CDC42,CDK11B,SH2B1,CDK1,CDK13,KANK2,CDKN1B,PSMD6,CRLF3,PSMD14,CSNK2A2,PSME3,DDX3X,DAPK3,CYLD,DLG1,PSMF1,DUSP3,CDC73,EGFR,FHL1,DYNC1LI1,PRMT5,RPS27L,SMAD3,MTA3,ANAPC1,PEBP1,NBN,ANAPC4,POLD1,PKN2,PRKCA,PDGFRB,ASUN,PML,PCID2,PIN1,RANBP1,PSMC5,PSMC4,PSMD1,PSMC6,PSMD3,PSMD2,PSMB8,PSMB9,PSMC2,PSMC1,PSME1,PS…
GO: Biological Process	GO:0042493	response to drug	4.348e-06	120	408	ACACA,ACADM,ACTC1,ADA,ABCC3,ADD3,ALDH1A1,ALAD,GGH,ANXA1,APOA2,ATP1A3,ATP1A1,BAG1,BDH1,BAK1,TXN2,BCL2,BTK,BLMH,GNPAT,FZD1,CA4,CALR,CAV1,CASP1,CDK4,CDH1,CDK1,MVP,CPT1A,CPB2,COMT,CTPS1,CTNNB1,MFSD10,DAD1,CYP11A1,CYP17A1,CYBB,CYP7B1,ABCG2,ATG5,DPYSL2,DPYD,DPEP1,ENO2,PPM1F,FBP1,PTK2B,ACSL1,FECH,ERBB2,VAV3,COL18A1,GNAS,ABCC4,GSTM3,GSTM1,TXNIP,NCKAP1L,HADH,HADHA,GRK5,HMBS,ICAM1,PARK7,INPPL1,LYN,SNX27,LI…
GO: Biological Process	GO:0048194	Golgi vesicle budding	4.369e-06	11	14	GBF1,ARCN1,COPA,COPB1,COPB2,TMED10,TMED2,COPE,ARFGAP1,TMED9,COPG1
GO: Biological Process	GO:0043603	cellular amide metabolic process	4.541e-06	57	161	VNN1,GSTK1,ASL,BTD,AASDHPPT,PPCDC,MRPS35,SPCS3,TPP1,GGCT,CTSH,DLD,DMD,ECE1,SPTLC2,DPEP1,FASN,TMED10,COASY,ASRGL1,G6PD,GLO1,GCLC,CPQ,GSTZ1,GSTT1,GSTP1,GSTM3,GSTM1,HTT,HAGH,GPX1,GSS,GSTA4,IDH1,IDE,LTA4H,LNPEP,MGST2,MGST3,MGST1,MME,MCCC1,MRPS9,PGAM1,SMPD4,CNDP2,SEC11C,SOD1,THOP1,STAT5A,XPNPEP1,NCSTN,DNPEP,ALDH5A1,PGLYRP2,NAPRT1
GO: Biological Process	GO:0007162	negative regulation of cell adhesion	4.695e-06	39	97	ACP5,ADAM10,ARHGAP6,ARHGDIB,ARHGDIA,CASK,CDH1,COL1A1,LPXN,MIA3,GSTP1,HRG,KNG1,JAK2,EPB41L5,LGALS1,LAMB1,MYO1F,MMP14,MMP2,NF1,NF2,MAP2K1,PRKG1,PLG,PIK3R1,SERPINE2,RASA1,PTK2,PTPRC,SIPA1,GTPBP4,TGFBI,THBS1,TNFAIP3,TBCD,SRC,UBASH3B,KANK1
GO: Biological Process	GO:0006987	activation of signaling protein activity involved in unfolded protein response	4.782e-06	29	64	ACADVL,ADD1,ATP6V0D1,CALR,CUL7,TPP1,PDIA6,VAPB,DCTN1,GOSR2,EIF2S1,PDIA5,EXTL3,GFPT1,HYOU1,SRPRB,HSPA5,LMNA,DNAJC3,ARFGAP1,C19orf10,SHC1,TLN1,SRPR,SEC31A,WFS1,HSP90B1,CXXC1,SYVN1
GO: Biological Process	GO:0007163	establishment or maintenance of cell polarity	4.796e-06	47	125	ARF6,ARHGEF2,ZW10,DST,CLIC4,CDC42,ARHGEF11,CKAP5,ACTR2,ACTR3,CTNNA1,CYTH1,DLG1,ROCK2,CDC42BPB,DOCK2,PTK2B,MPP7,NCKAP1,STK25,CAP2,CAP1,GNB2L1,HTT,NCKAP1L,ARFGEF1,ILK,LMNA,LLGL1,MAP1B,MAP4,NUMA1,MYH9,MYO9B,PARVB,PARVA,RAP1B,ERBB2IP,ROCK1,PTK7,PTK2,FBF1,DOCK7,EZR,CLASP1,SCRIB,KANK1
GO: Biological Process	GO:0009113	purine nucleobase biosynthetic process	4.842e-06	10	12	ADA,GMPS,APRT,CECR1,GART,PAICS,HPRT1,PPAT,PRPS1,SHMT1
GO: Biological Process	GO:0042340	keratan sulfate catabolic process	4.842e-06	10	12	FMOD,GLB1,GNS,GALNS,HEXA,HEXB,LUM,OMD,OGN,PRELP
GO: Biological Process	GO:0032870	cellular response to hormone stimulus	4.924e-06	136	475	ADCY3,PARP1,AKT1,AHSG,AIF1,AKT2,ANXA1,APOB,PLOD3,ATP6V0D1,ATP6V1B1,ATP6V1B2,ATP6V0C,ATP6V0A1,ATP6V1E1,ATP6V1C1,FZD1,AKR1C3,CDK2,CDK1,C2CD5,ATP6V1H,TBC1D4,ACSL5,CRK,AKT3,ATP6V1D,CTSS,CTSB,CTSH,CTSL1,CSK,CYP11A1,CYP17A1,INPP5K,CAB39,EIF4B,EIF4G1,FBP1,FECH,FER,GNB4,MTOR,AKAP13,NR5A1,GAB1,ADRM1,BAIAP2,GOT1,PGRMC2,GNAS,GNB1,GNB2,TCIRG1,GFPT1,SORBS1,GRB2,GRB14,HMBS,IDE,JAK2,INPPL1,LYN,CAB39L,LEPR,KRAS,…
GO: Biological Process	GO:0018105	peptidyl-serine phosphorylation	5.112e-06	50	136	ADRBK1,AKT1,AKT2,ARAF,RPS6KA4,ARRB1,ATM,BAK1,BAX,BCL2,CAMK2D,CAV1,PRKD2,CDC42,CD44,AKT3,MAPK14,LRRK2,MAPKAPK2,INPP5K,PPM1F,MTOR,HCLS1,HK1,SPTBN4,ILK,MIF,PAK1,PAK2,MAP2K2,MAPK13,PRKDC,PRKD1,MAPK1,PRKCA,PRKACA,PDK3,PIK3CA,TBK1,MAPK12,RPS6KA2,TGFBR2,PHIP,STK4,TAF1,DOCK7,SRC,TTBK2,MORC3,MAPKAPK3
GO: Biological Process	GO:0010952	positive regulation of peptidase activity	5.112e-06	50	136	RIPK1,FAM162A,TRADD,APAF1,AIFM1,BAK1,BAX,FOXL2,C6,C9,CAV1,CASP1,CASP7,CASP8,CDKN1B,PDCD6,CTSH,PSMD14,PSME3,DDX3X,PPM1F,FBLN1,CLPX,FN1,ADRM1,GNB2L1,RPS27L,FIS1,HIP1,HTRA2,IFI16,JAK2,SMAD3,MEN1,MAP3K5,MMP14,PCOLCE,MAPK9,NLRP2,PML,PYCARD,PSME1,PSME2,S100A9,S100A8,MTCH1,RPS3,UACA,IFT57,VCP
GO: Biological Process	GO:0071616	acyl-CoA biosynthetic process	5.186e-06	20	37	ACACA,ACSL5,DBT,DLD,FASN,ACSL3,ACSL1,ACSL4,GCDH,PDHB,PDK3,PDK2,ACSS2,SLC25A1,PDP1,PDPR,ACSS1,ACSL6,MLYCD,PDHX
GO: Biological Process	GO:0035384	thioester biosynthetic process	5.186e-06	20	37	ACACA,ACSL5,DBT,DLD,FASN,ACSL3,ACSL1,ACSL4,GCDH,PDHB,PDK3,PDK2,ACSS2,SLC25A1,PDP1,PDPR,ACSS1,ACSL6,MLYCD,PDHX
GO: Biological Process	GO:0022406	membrane docking	5.186e-06	20	37	VPS33B,CHP1,YKT6,EXOC5,ICAM1,VPS45,MSN,RAB8A,NCAM1,PLEK,SCFD2,RALB,ROCK1,EXOC6,STXBP2,STXBP1,STXBP3,EZR,SCFD1,EXOC6B
GO: Biological Process	GO:0015749	monosaccharide transport	5.345e-06	48	129	AKT1,AK1,AKT2,CLTCL1,RAE1,PEA15,AOC3,C2CD5,NUPL1,NUP153,NUP35,NUP37,ASPSCR1,INPP5K,NUP155,NUP93,FABP5,NUP50,NUPL2,NUP85,MGEA5,SORBS1,HK2,HK1,HK3,M6PR,MIF,NUP88,NUP107,PRKCA,PRKCB,PRKAA1,ITLN1,ENPP1,PIK3R1,NUP133,SEH1L,PTPN11,SLC2A1,SORT1,PID1,STXBP3,YES1,NUP54,NUP214,NUP205,NUP210,NUP160
GO: Biological Process	GO:0006402	mRNA catabolic process	5.489e-06	64	188	ATM,UPF2,PNPT1,CNOT10,EIF4A3,THRAP3,RBM8A,DDX6,NUDT16,EIF4B,EIF4G1,RNPS1,ETF1,EDC3,PAIP1,GSPT1,LSM3,LSM2,EIF3E,PABPC1,UPF3B,MAGOH,ZC3HAV1,MLH1,CNOT7,NCBP1,RPL10A,CNOT3,CNOT2,EXOSC10,PPP2CA,PPP2R1A,DCP1B,UPF1,RPL10,RPL19,DCPS,RNH1,XRN1,EDC4,RPS5,RPS9,RPS12,RPS10,RPLP1,RPS4X,RPS3A,RPS3,RPLP0,RPL22,RPS21,GSPT2,RPS27A,RPS15,RPS15A,RPS19,RPS16,TNKS1BP1,CASC3,ZHX2,DIS3,EXOSC7,CNOT1,EXOSC2
GO: Biological Process	GO:0015758	glucose transport	6.167e-06	47	126	AKT1,AK1,AKT2,CLTCL1,RAE1,PEA15,AOC3,C2CD5,NUPL1,NUP153,NUP35,NUP37,ASPSCR1,INPP5K,NUP155,NUP93,FABP5,NUP50,NUPL2,NUP85,MGEA5,SORBS1,HK2,HK1,HK3,MIF,NUP88,NUP107,PRKCA,PRKCB,PRKAA1,ITLN1,ENPP1,PIK3R1,NUP133,SEH1L,PTPN11,SLC2A1,SORT1,PID1,STXBP3,YES1,NUP54,NUP214,NUP205,NUP210,NUP160
GO: Biological Process	GO:1901607	alpha-amino acid biosynthetic process	6.439e-06	30	68	EIF2B2,EIF2B4,PHGDH,ASL,BHMT,BCAT2,ALDH4A1,EIF2B1,PADI2,THNSL1,GLS,GOT2,GOT1,APIP,GLUL,MTHFD1,MTHFR,MTAP,MTR,OAT,SRR,ALDH18A1,SLC1A3,SHMT1,SHMT2,PADI4,THNSL2,ADI1,SEPHS2,MRI1
GO: Biological Process	GO:0071345	cellular response to cytokine stimulus	6.479e-06	134	469	RIPK1,ADAR,TRADD,AIF1,ALAD,APOB,RPS6KA4,ARIH1,CAMK2D,CAMK2G,PIAS1,LSM14A,CAV1,RAE1,PNPT1,CD74,CD44,EIF4A3,CHI3L1,CDK9,NUPL1,CCR1,CNTFR,NUP153,NUP35,NUP37,CSNK2B,DDX41,UBE2L6,DAPK3,CYP11A1,INPP5K,ECM1,DPYSL3,NUP155,CTR9,EIF4G1,EIF4G2,NUP93,FASN,PTK2B,ACSL1,FER,EPRS,NUP50,CORO1A,CDC37,TMEM173,GAB1,FLNB,NUPL2,NUP85,SYNCRIP,TUBA1B,GBP1,GSTP1,HCK,HCLS1,GPD1,AGPAT1,HSP90AB1,HSPA5,HPX,HMBS,HLA-DRA,HLA-D…
GO: Biological Process	GO:0072384	organelle transport along microtubule	7.296e-06	18	32	CDC42,LRPPRC,KIF3B,RHOT2,KIF3A,HTT,KIF5B,MAP1B,MAPT,MAP2K1,PEX14,KIF13A,RAB6A,RHOT1,MAP1S,COPG1,KIFAP3,KIF1B
GO: Biological Process	GO:0000387	spliceosomal snRNP assembly	7.296e-06	18	32	PRPF31,SART1,GEMIN5,WDR77,GEMIN6,GEMIN4,DDX20,PRMT5,CD2BP2,LSM2,NCBP1,SNRPG,SNRPD1,SNRPD2,SNRPD3,SNRPE,SNRPB,PRPF6
GO: Biological Process	GO:0006984	ER-nucleus signaling pathway	7.351e-06	40	102	AARS,ACADVL,ADD1,ATP6V0D1,ATP2A2,BAK1,BAX,CALR,DERL1,CUL7,TPP1,PDIA6,VAPB,DCTN1,GOSR2,EIF2S1,PDIA5,EXTL3,DERL2,GFPT1,HYOU1,SRPRB,HSPA5,LMNA,EIF2A,ERO1L,CCDC47,DNAJC3,ARFGAP1,C19orf10,PTPN1,SHC1,TLN1,SRPR,SEC31A,WFS1,VCP,HSP90B1,CXXC1,SYVN1
GO: Biological Process	GO:0007167	enzyme linked receptor protein signaling pathway	7.365e-06	245	947	ABR,NRP1,NRP2,ADAM10,ADCY3,PARP1,ADRBK1,AP2B1,AP2A2,AP2A1,AGT,AKT1,SGPL1,SQSTM1,ARHGEF7,AHSG,AKT2,DOK2,MYOF,AATF,ARRB2,ARHGAP4,ARHGDIA,ARHGEF2,FIBP,HGS,ARHGEF1,ATP6V0D1,ATP6V1B1,ATP6V1B2,ATP6V0C,ATP6V0A1,ATP6V1E1,ATP6V1C1,USP9X,NCK2,FZD1,CALM3,CBL,GIGYF2,CAV1,PRKD2,CDC42,CDK1,ZFYVE16,CHN1,CDK9,ARHGEF11,CDKN1B,RAB14,ATP6V1H,USP15,AP2M1,CLTA,CLTC,ABI1,CRK,ECSIT,COL3A1,CTNNB1,ATP6V1D,UCHL5,MAPK14,CS…
GO: Biological Process	GO:0008360	regulation of cell shape	7.399e-06	42	109	ALDOA,ANXA7,LIMD1,C21orf2,FMNL1,SEPT7,DIAPH1,MYH14,EPB41,EPB41L2,PTK2B,FERMT2,FGR,FES,F2,CORO1A,FN1,FGD3,CDC42EP2,CFDP1,HCK,MYL12A,GNA13,CDC42EP3,ARHGAP35,HEXB,ICAM1,ITGB2,MYH9,PARVB,PRPF40A,PARVA,SYNE3,RASA1,PTK2,FMNL3,ARAP1,PLXNB2,CDC42EP4,SPTA1,EZR,CYFIP1
GO: Biological Process	GO:0002253	activation of immune response	7.793e-06	99	327	A2M,RIPK1,ADA,ARF6,ARRB2,BCL2,BTK,C1R,C1QC,C2,C1QBP,SERPING1,C6,C7,C8A,C8B,C8G,C9,C4BPA,C5,CACNB3,LSM14A,CASP8,PRKD2,CD14,SIN3A,CDK1,CD59,CLU,SPG21,MAPK14,CSK,MAPKAPK2,CYLD,LPXN,CFD,DUSP3,MALT1,IGKV1-5,TMEM173,TAB1,VAV3,MASP2,HCK,NCKAP1L,HLA-DRA,HLA-DPA1,IGHM,IFI16,IRF3,LYN,MAVS,LCP2,ZC3HAV1,MNDA,ITCH,PAWR,PAK1,PAK2,NCK1,NFKB2,NFKB1,MAP2K1,MAP2K2,MAP2K3,MAPK9,MAP2K6,MAPK3,MAPK1,PRKCB,DDX60,PDPK1,…
GO: Biological Process	GO:0006944	cellular membrane fusion	8.091e-06	37	92	VPS33B,NAPG,NAPA,SNAP23,ANXA7,ANXA1,ANXA2,RABEP1,DYSF,BAK1,BAX,TECPR1,EEA1,STX7,WIPI2,CD9,STX11,USO1,C2CD5,MFN2,GOSR2,AFG3L2,VCPIP1,VAV3,VAT1,GNAI3,GM2A,ATG7,ITGA3,RAB8A,NSF,OPA1,SERPINA5,NPLOC4,MFN1,PID1,OMA1
GO: Biological Process	GO:0007009	plasma membrane organization	8.475e-06	41	106	AKT1,AKT2,ANK2,ANK3,MYOF,WASL,ARF6,RHOG,DYSF,PIP5K1A,CDH1,C2CD5,FLOT1,DLG1,INPP5K,TMED2,GNB2L1,NDRG1,MYL12A,AGRN,SORBS1,KIF5B,SPTBN4,MYO5A,PDPK1,DENND4C,ANO6,PACS1,PIK3R1,SOD1,S100A9,SCP2,PID1,FNBP1L,SPTB,SPTBN1,SPTA1,FCHO2,A4GALT,EHD3,PACS2
GO: Biological Process	GO:0031334	positive regulation of protein complex assembly	8.475e-06	41	106	WASL,ARF6,BID,BAX,NCK2,CAV1,BCLAF1,EVL,CDKN1B,HDAC6,ARPC2,ACTR3,ARPC4,SNX9,DLG1,PTK2B,FER,FES,MPP7,MTOR,CORO1A,FAF1,CDC42EP2,GNB2L1,SH3GLB1,STUB1,HCK,NCKAP1L,GRB2,IDE,MAP1B,MAPT,NCK1,PFN2,PLEK,PYCARD,RAC1,TAF1,SRC,SCIN,VCP
GO: Biological Process	GO:0051235	maintenance of location	8.48e-06	71	217	AP3D1,ALB,ANK2,ANK3,APOE,BUB3,ASPH,SUN2,BAX,CAMK2D,CALM3,CALR,CAV1,CDC42,G3BP2,SUFU,CTNNB1,DAG1,DBN1,DBI,DIAPH1,FBN1,PTK2B,OS9,F2,NR5A1,GAA,FLNA,FLNB,FAF1,TACC3,ABHD5,PDIA3,CHERP,ASPM,SPTBN4,JUP,ITPR1,ITGAV,LYN,LTBP1,TLN2,ERO1L,PCM1,GOPC,PFN1,PEX14,ENPP1,PML,PLCG2,SYNE3,SEH1L,TWF1,PTPRC,S100A9,S100A8,ARL2BP,THY1,TLN1,SRI,YWHAB,EZR,TRIP6,UBASH3B,HSP90B1,CLASP1,SYNE1,SUN1,CHAMP1,MORC3,HOOK3
GO: Biological Process	GO:0010038	response to metal ion	8.911e-06	85	272	IQGAP1,ACADM,ACO1,ACTG1,ALB,ALAD,GGH,ANXA11,ANXA7,ASPH,BAG1,BDH1,BCL2,CA2,CALM3,CALR,CAV1,CASP8,AKR1C3,SLC25A12,CLIC4,CDH1,CDK1,CDKN1B,CUTA,CPOX,CP,PDCD6,ABCB6,SLC25A13,CTNNB1,CYP11A1,DPEP1,EGFR,FBP1,PTK2B,FECH,FGG,FGB,FGA,NDRG1,GDI1,GATM,TXNIP,HTT,GSN,GSS,HMOX1,HMBS,ICAM1,IMPA1,LTA4H,KRT10,MAOB,MNAT1,NPC1,PEBP1,PCNA,NCAM1,NEDD4,NFATC3,SLC30A5,NFKB1,MAPK9,PPP3CA,PLCD1,PLCG2,PIK3R1,SERPINA1,QDPR,S…
GO: Biological Process	GO:0010638	positive regulation of organelle organization	9.089e-06	74	229	FAM162A,ANXA1,ANXA2,WASL,ARF6,RPS6KA4,ARRB1,BID,BAK1,BAX,NIPBL,NCK2,C1QBP,CAV1,POT1,SH2B1,EVL,CDKN1B,ARPC2,ACTR3,ARPC4,DNM1L,SORBS3,CTBP1,DNMT1,DLG1,ROCK2,NCOR1,ARHGEF10,PPM1F,CTR9,PTK2B,WDR61,FER,FES,TRPV4,MTOR,CORO1A,CDC42EP2,SH3GLB1,HCK,NCKAP1L,HCLS1,GRB2,SYNPO,SMAD3,LMAN1,MAP1B,MAPT,MEN1,PEBP1,PAK1,NCK1,NF2,MAPK3,PFN2,PFN1,PLXNA3,PDGFRB,SERPINF2,PML,PLEK,FHOD1,PYCARD,RANBP1,RAC1,RNF20,TMED9,M…
GO: Biological Process	GO:0045860	positive regulation of protein kinase activity	9.185e-06	128	447	IQGAP1,ACADVL,RIPK1,ADCY3,ADD1,AGT,AKT1,SPAG9,ARAF,ARRB1,ATP6V0D1,C5,CALR,SPDYA,LAMTOR3,CDK1,CD81,CD74,CHI3L1,PTPLAD1,CUL7,CCR1,TPP1,ABI1,CRK,TAOK3,PDIA6,MAPK14,CSPG4,CSK,VAPB,DCTN1,LRRK2,MAPKAPK2,DAB2,DLG1,CAB39,GOSR2,EGFR,EIF2S1,PTK2B,ACSL1,PDIA5,MALT1,ERBB2,EXTL3,PDCD10,MAP4K5,GAB1,TAB1,GNAI2,GFPT1,NCKAP1L,CAMKK2,HYOU1,RAPGEF1,SRPRB,HSP90AB1,HSPA5,IGHM,ZP4,JAK2,SLC27A1,ITGA1,ILK,TAOK1,LMNB1,LM…
GO: Biological Process	GO:0006368	transcription elongation from RNA polymerase II promoter	9.508e-06	33	79	IKBKAP,NELFB,NELFCD,CDK9,DAB2,CTR9,CDC73,WDR61,SUPT16H,ADRM1,GTF2B,GTF2F2,GTF2E1,GTF2E2,MNAT1,NCBP1,POLR2C,POLR2E,POLR2G,POLR2H,POLR2A,POLR2B,MAP2K1,PAF1,TCEB1,ELP2,SUPT5H,TAF1,ELP3,SSRP1,NELFA,BRD4,NELFE
GO: Biological Process	GO:0070646	protein modification by small protein removal	9.508e-06	33	79	USP13,USP8,USP10,TRRAP,USP11,USP9X,COPS3,USP34,BRCC3,USP15,UCHL5,PSMD14,CYLD,COPS5,COPS6,COPS8,COPS4,COPS7A,GPS1,STAMBP,WDR48,ITCH,OTUD7B,USP25,USP47,TNFAIP3,TRIM21,USP4,UCHL3,UCHL1,USP22,USP5,USP7
GO: Biological Process	GO:0006337	nucleosome disassembly	9.881e-06	12	17	BAZ1B,ARID1A,SUPT16H,ARID2,SMARCD3,SMARCE1,SMARCD2,SMARCC2,SMARCB1,SMARCC1,SMARCA4,SET
GO: Biological Process	GO:0065005	protein-lipid complex assembly	9.881e-06	12	17	ABCA1,APOB,APOA4,APOA2,APOE,APOC3,DGAT1,ACSL3,FECH,APOM,SOAT1,NR1H2
GO: Biological Process	GO:0031498	chromatin disassembly	9.881e-06	12	17	BAZ1B,ARID1A,SUPT16H,ARID2,SMARCD3,SMARCE1,SMARCD2,SMARCC2,SMARCB1,SMARCC1,SMARCA4,SET
GO: Biological Process	GO:0034377	plasma lipoprotein particle assembly	9.881e-06	12	17	ABCA1,APOB,APOA4,APOA2,APOE,APOC3,DGAT1,ACSL3,FECH,APOM,SOAT1,NR1H2
GO: Biological Process	GO:0032986	protein-DNA complex disassembly	9.881e-06	12	17	BAZ1B,ARID1A,SUPT16H,ARID2,SMARCD3,SMARCE1,SMARCD2,SMARCC2,SMARCB1,SMARCC1,SMARCA4,SET
GO: Biological Process	GO:0007266	Rho protein signal transduction	1.013e-05	71	218	ABCA1,ABR,CTNNAL1,ARHGEF7,APOE,APOC3,ARRB1,ARHGAP6,ARHGAP5,ARHGAP4,ARHGAP1,ARHGDIB,ARHGDIA,RHOG,RHOB,ARHGEF2,ARHGEF1,PIP5K1A,CUL3,PKP4,CDC42,DOCK4,PTPLAD1,CHN1,ARHGEF11,CRK,FARP1,FLOT1,ARHGEF6,ROCK2,ARHGEF10,PTK2B,ITSN2,ERBB2,EPHB3,MTOR,AKAP13,FGD3,BAIAP2,VAV3,CDC42EP2,NCKAP1L,AGRN,GNA13,ARFGEF1,ARHGAP35,SPATA13,PREX1,MYO9B,PIN1,RAP1GDS1,PYCARD,ROCK1,PTK2,RAC1,ARAP1,PLXNB2,CDC42EP4,THY1,RASIP1,SY…
GO: Biological Process	GO:0043900	regulation of multi-organism process	1.013e-05	71	218	ADAR,ADA,AP1M1,AP1S2,AP2B1,AP1B1,AP2A2,AP2A1,AP1G1,BCL2,C1QBP,SIN3A,NELFB,NELFCD,CDK9,ELMO1,ATP6V1H,AP2M1,VAPB,DDX5,RSF1,INPP5K,DOCK2,SUPT16H,TMEM173,GTF2F2,HCK,IFIT1,IFI16,ITGAV,IRF3,MAVS,MPO,MX1,MIF,ZC3HAV1,MNAT1,ITCH,OAS1,PAK2,PCBP2,NCBP1,POLR2C,POLR2E,POLR2G,POLR2H,POLR2A,POLR2B,PRKCA,PFN1,DDX60,PML,PACS1,PYCARD,RAC1,RAD23A,SMARCB1,SMARCA4,DDX58,TLR2,TNFAIP3,TOP2A,TCEB1,PRDX2,TRIM5,SUPT5H,SSR…
GO: Biological Process	GO:0090066	regulation of anatomical structure size	1.014e-05	102	341	NRP1,ACTA2,ADD1,AGT,AKT1,ALOX5,APOE,WASL,ARF6,PLOD3,ARHGAP5,ARHGAP4,ATP1A2,NCK2,CAPG,CAPZA1,CAPZA2,CAV1,CAPZB,EVL,LIMA1,ARPC2,ACTR3,ARPC3,ARPC1B,ARPC4,TRPV2,LRRK2,DLG1,ECE1,ATG5,PTK2B,FER,EPHX2,CLN8,MTOR,CORO1A,G6PD,TRIOBP,WDR36,GCLC,CDC42EP2,HCK,NCKAP1L,HCLS1,ARFGEF1,GPX1,GSN,GRB2,ARPC1A,HSP90AB1,HMOX1,ICAM1,KNG1,ARPC5L,SPTBN4,ITGA1,ILK,PREX1,MAP1B,MAPT,MTPN,MMP2,ACTR3B,DEPTOR,NCK1,RTN4,TMOD3,MA…
GO: Biological Process	GO:0042440	pigment metabolic process	1.094e-05	28	63	ADA,AP3D1,ADRBK2,ALAD,GMPS,AMBP,APRT,BCL2,BLVRB,BLVRA,CPOX,CECR1,FECH,GART,HEBP1,PAICS,HPRT1,HPX,HMOX2,HMOX1,HMBS,IREB2,MYO5A,PPOX,PPAT,PRPS1,SHMT1,UROD
GO: Biological Process	GO:0045022	early endosome to late endosome transport	1.097e-05	14	22	MTMR2,EEA1,DAB2,VPS4B,FLNA,IGHM,MAP2K1,MAP2K2,MAPK3,MAPK1,KIF16B,PIK3C3,AKTIP,HOOK3
GO: Biological Process	GO:0030100	regulation of endocytosis	1.101e-05	54	154	ABR,ACTN4,ADD1,MTMR2,AHSG,BIN1,APOC3,APOC2,WASL,ARF6,ARRB2,PICALM,CALR,CBL,CAV1,CD14,ZFYVE16,SNX17,CSK,DAB2,DOCK2,FGR,RUFY1,PACSIN2,KIF3A,GNB2L1,HCK,NCKAP1L,HNRNPK,HIP1,IGHM,ITGAV,MYH9,PRKD1,PRKCA,PPT1,SCYL2,PLD2,PYCARD,PTK2,RAB4A,RAB5B,RAC1,RAB5C,PTPN1,CD2AP,SYK,EPN2,AAK1,NR1H2,TSC2,NEDD4L,SYNE1,EHD4
GO: Biological Process	GO:0032320	positive regulation of Ras GTPase activity	1.109e-05	39	100	ALDH1A1,AKT2,ARHGAP5,ARHGAP4,RHOG,PIP5K1A,TBC1D10B,PKP4,DOCK4,PTK2B,ERBB2,CDC42EP2,NCKAP1L,ARHGAP35,PREX1,LLGL1,RALGAPA2,MYO9B,RALGAPB,NF1,TBC1D2,MAP2K1,PIN1,RAP1GDS1,RANGAP1,RASA1,DAB2IP,ARAP1,SIPA1,RALGAPA1,THY1,SYDE1,DOCK7,RASA3,RAB3GAP1,SRGAP2,SCRIB,ARHGAP26,TAX1BP3
GO: Biological Process	GO:0030182	neuron differentiation	1.142e-05	281	1112	NRP1,NRP2,NAPA,ACTG1,AP2B1,MTMR2,AP2A2,AP2A1,AKT1,ALCAM,PHGDH,ALDH1A2,ANK2,SPAG9,ANK3,APOE,WASL,ARF6,RPS6KA4,ARL3,DCLK1,ARHGAP4,ARHGDIA,RHOG,RHOB,ARHGEF1,AIFM1,BAG1,PICALM,ATXN10,BCL2,STK24,NCK2,DST,FZD1,CALR,CACNB3,GIGYF2,CAV1,NUMB,CDH11,CDH1,CDC42,CDK1,CD44,EVL,CHN1,ARHGEF11,FIG4,PIGT,CNP,COL1A1,CNTN1,AP2M1,CLU,SUFU,CLTA,CLTC,CRMP1,ACTR3,COL5A2,COL6A1,COL6A2,COL6A3,COL4A1,COL3A1,COL4A2,CTNNA1,C…
GO: Biological Process	GO:0010970	microtubule-based transport	1.177e-05	31	73	AP3D1,ARL3,DST,AP3B1,CDC42,LRPPRC,KIF3B,TTC21B,RHOT2,KIF3A,HTT,KLC1,KIF5B,AP3M1,MAP1B,MAPT,OPA1,NME7,MAP2K1,PEX14,KIF13A,RAB6A,SOD1,RHOT1,MAP1S,SPG7,COPG1,KIFAP3,UCHL1,AP3B2,KIF1B
GO: Biological Process	GO:0031532	actin cytoskeleton reorganization	1.181e-05	27	60	PIP5K1A,CDC42BPA,DAPK3,CDC42BPB,PTK2B,FER,FES,TRPV4,EPS8,FLNA,HCK,HCLS1,PAK1,MYH9,PARVB,PDGFRA,PLEK,RAP2A,RALA,PHPT1,PTK7,PTPN1,ARAP1,SHC1,S100A9,SPTAN1,LPIN1
GO: Biological Process	GO:0006898	receptor-mediated endocytosis	1.198e-05	52	147	ADRBK1,ADRBK2,MTMR2,APOB,APOE,APOC3,APOC2,WASL,ARF6,ARRB1,ARRB2,PICALM,CLTCL1,CANX,CBL,CAV1,SNX17,CETP,CLTC,SNX9,PDLIM7,DAB2,DNM2,DNM1,CTTN,KIF3A,CAP1,GRB2,HNRNPK,HIP1,IGF2R,M6PR,LRP1,MSR1,NEDD4,MAPK3,MAPK1,PRKCA,PPT1,SCYL2,PLD2,RAC1,SORL1,CD2AP,TGFBR2,REPS1,FNBP1L,AAK1,VLDLR,FCHO2,SYNE1,STAB1
GO: Biological Process	GO:0045454	cell redox homeostasis	1.265e-05	26	57	APEX1,AIFM1,TXN2,C11orf31,GLRX5,PDIA6,TXNL1,DLD,PDIA5,PTGES2,GCLC,GPX1,TXNRD2,PDIA3,GLRX3,TMX1,TXNDC5,P4HB,SH3BGRL3,TMX4,QSOX1,TMX3,DNAJC10,QSOX2,TXNRD1,ERP44
GO: Biological Process	GO:0070647	protein modification by small protein conjugation or removal	1.281e-05	182	679	FBXO4,FBXO6,AKT1,CDC16,NAE1,UBE2M,UBA3,USP13,ARRB1,ARRB2,BUB3,USP8,USP10,TRRAP,ARIH1,HECTD1,USP11,USP9X,BCL2,BLMH,COPS3,LTN1,PIAS1,CUL4B,CBL,CUL4A,CUL3,CUL2,CUL1,CAV1,HERC4,CDC23,CDK2,CDK1,USP34,UFC1,CUL7,RNF40,BRCC3,PSMD6,USP15,CLU,SUFU,HDAC6,HUWE1,UBA2,SAE1,TRIM28,UCHL5,UBR5,PSMD14,PSME3,DDB1,LRRK2,HECTD3,TRIP12,CYLD,UBE4A,KLHL36,PSMF1,ATG5,BAG5,NPEPPS,CTR9,CDC73,PTK2B,COPS5,COPS6,OS9,COPS8,MAL…
GO: Biological Process	GO:0046112	nucleobase biosynthetic process	1.338e-05	11	15	ADA,GMPS,APRT,CECR1,GART,PAICS,HPRT1,PPAT,PRPS1,SHMT1,UMPS
GO: Biological Process	GO:0006167	AMP biosynthetic process	1.347e-05	7	7	ADK,ADSL,ADSS,ADSSL1,APRT,PRPS1,PRPS2
GO: Biological Process	GO:0034470	ncRNA processing	1.435e-05	71	220	AARS,RRP9,ELAC2,INTS7,EIF4A3,C22orf28,SRRT,TRMT6,NOP58,MPHOSPH10,NOC4L,NOLC1,QTRTD1,NOL9,DKC1,NUDT16,WBP11,GEMIN4,PUS1,POP1,FBL,UTP14A,FRG1,WDR36,INTS5,UTP18,TRNT1,NPM3,FARS2,HSD17B10,TBL3,NOP56,RPP30,UTP20,KARS,SMAD2,SMAD3,URM1,TRMT1L,INTS2,NOL6,INTS3,METTL1,PA2G4,INTS4,NOP2,EXOSC10,TRMT1,OSGEP,INTS9,UTP6,NOB1,SARS,RPS21,RPS15,RPS19,RPS16,TRMT10C,THG1L,NSUN2,CDKAL1,INTS10,HEATR1,SSB,DIS3,EXOSC7,…
GO: Biological Process	GO:0006378	mRNA polyadenylation	1.478e-05	15	25	PNPT1,CSTF3,CSTF1,CDC73,PAPOLA,AHCYL1,CPSF6,NUDT21,GRSF1,PABPC1,FIP1L1,PAPOLG,CPSF1,PAF1,CSTF2T
GO: Biological Process	GO:0042176	regulation of protein catabolic process	1.597e-05	57	167	AKT1,APOE,HGS,USP14,CUL4B,CUL4A,GGA1,CDC42,CDKN1B,CLU,SUFU,UCHL5,PSMD14,PSME3,LRRK2,DAB2,SERPINB1,EGFR,PTK2B,FLNA,FAF1,LPCAT1,GCLC,GNB2L1,STUB1,GPX1,HSP90AB1,UBE2K,SMAD3,SMAD4,ITCH,SH3D19,NRD1,UBQLN4,NEDD4,PRKACA,PPP2R3A,PPP2CA,PML,SERPINE2,RELA,PSMD1,PSMD3,PSMD2,PTK2,RAD23B,RAD23A,SNX1,HSPBP1,TNFAIP3,TAF1,XPO1,VCP,NEDD4L,USP5,BAG6,ATG4B
GO: Biological Process	GO:0051651	maintenance of location in cell	1.618e-05	42	112	ALB,ANK3,APOE,BUB3,SUN2,CAV1,CDC42,G3BP2,SUFU,CTNNB1,DAG1,DBN1,OS9,NR5A1,GAA,FLNA,FLNB,FAF1,TACC3,PDIA3,ASPM,SPTBN4,JUP,TLN2,PCM1,GOPC,PEX14,PML,SYNE3,SEH1L,ARL2BP,TLN1,SRI,YWHAB,EZR,TRIP6,CLASP1,SYNE1,SUN1,CHAMP1,MORC3,HOOK3
GO: Biological Process	GO:0000910	cytokinesis	1.658e-05	40	105	ANXA11,ANK3,ARL3,RHOB,USP8,CALM3,CUL3,PKP4,NEK7,AHCTF1,CDC42,SEPT7,ARHGEF11,CETN2,ACTR2,ACTR3,DAPK3,DIAPH2,CENPV,ROCK2,NUDC,STAMBP,BIRC6,MYH9,SEPT2,SEPT5,PKN2,PRPF40A,PIK3C3,PIN1,RALB,RALA,RASA1,ROCK1,KIF13A,SON,SPTBN1,ZFYVE26,SPG20,SEPT6
GO: Biological Process	GO:0048699	generation of neurons	1.949e-05	299	1200	NRP1,NRP2,NAPA,ACTG1,AP2B1,MTMR2,AP2A2,AP2A1,AKT1,ALCAM,PHGDH,ALDH1A2,ANK2,SPAG9,ANK3,APOE,WASL,ARF6,RPS6KA4,ARL3,DCLK1,ARHGAP4,ARHGDIA,RHOG,RHOB,ARHGEF2,ARHGEF1,AIFM1,BAG1,PICALM,ATXN10,BAX,BCL2,STK24,NCK2,DST,FZD1,CALR,CACNB3,GIGYF2,CAV1,NUMB,CDK6,CDH11,CDH1,CDC42,CDK1,CD44,EVL,CHN1,ARHGEF11,FIG4,PIGT,CNP,COL1A1,CNTN1,AP2M1,CLU,SUFU,CLTA,CLTC,CRMP1,ACTR3,COL5A2,COL6A1,COL6A2,COL6A3,COL4A1,COL3A…
GO: Biological Process	GO:0001676	long-chain fatty acid metabolic process	1.993e-05	25	55	ACAA1,ACADL,ACOX1,ABCD1,ALOX15,ALOX5,PLA2G4C,ACSL5,CPT1A,QKI,SLC27A3,SLC27A4,ACSL3,ACSL1,ACSL4,EPHX2,HSD17B4,SLC27A1,MGLL,FADS1,MYO5A,DAGLB,PTGS1,SCP2,ACSL6
GO: Biological Process	GO:0019509	L-methionine salvage from methylthioadenosine	2.004e-05	8	9	EIF2B2,EIF2B4,EIF2B1,GOT1,APIP,MTAP,ADI1,MRI1
GO: Biological Process	GO:0043102	amino acid salvage	2.004e-05	8	9	EIF2B2,EIF2B4,EIF2B1,GOT1,APIP,MTAP,ADI1,MRI1
GO: Biological Process	GO:0071267	L-methionine salvage	2.004e-05	8	9	EIF2B2,EIF2B4,EIF2B1,GOT1,APIP,MTAP,ADI1,MRI1
GO: Biological Process	GO:0071265	L-methionine biosynthetic process	2.004e-05	8	9	EIF2B2,EIF2B4,EIF2B1,GOT1,APIP,MTAP,ADI1,MRI1
GO: Biological Process	GO:0030705	cytoskeleton-dependent intracellular transport	2.008e-05	32	78	AP3D1,ARL3,DST,AP3B1,CDC42,LRPPRC,KIF3B,TTC21B,RHOT2,KIF3A,TUBA1B,HTT,KLC1,KIF5B,AP3M1,MAP1B,MAPT,OPA1,NME7,MAP2K1,PEX14,KIF13A,RAB6A,SOD1,RHOT1,MAP1S,SPG7,COPG1,KIFAP3,UCHL1,AP3B2,KIF1B
GO: Biological Process	GO:0006188	IMP biosynthetic process	2.014e-05	9	11	ADSL,AMPD3,AMPD2,ATIC,GART,PAICS,HPRT1,PPAT,PFAS
GO: Biological Process	GO:0008654	phospholipid biosynthetic process	2.015e-05	71	222	DPM1,MTMR1,MTMR2,APOA2,ATM,MTMR6,PIP5K1A,GNPAT,DGAT1,PLA2G4C,CD81,ISYNA1,FIG4,PIGT,LPGAT1,ACSL5,PIGK,ALG12,ALG9,GGPS1,PCYT1B,INPP5K,SPTLC2,ACSL3,FDPS,FABP5,PLBD1,LPCAT1,ABHD5,SH3GLB1,CDIPT,HADHB,HADHA,GPD1,AGPAT1,HEXB,IDI1,SLC27A1,INPPL1,MGLL,INPP4A,IMPA1,FADS1,MTM1,OCRL,AGPAT3,SLC44A2,PCYT1A,VAC14,PLD1,PLCG2,PLD2,PIK3C2A,PIK3CA,PIK3C3,PIK3R1,PI4KA,PIP4K2A,MTMR14,PCYT2,GPCPD1,PLD3,PIGN,PITPNB,PIG…
GO: Biological Process	GO:0050688	regulation of defense response to virus	2.023e-05	29	68	AP1M1,AP1S2,AP2B1,AP1B1,AP2A2,AP2A1,AP1G1,C1QBP,SIN3A,ELMO1,ATP6V1H,AP2M1,DOCK2,TMEM173,HCK,IFIT1,IRF3,MAVS,ZC3HAV1,ITCH,PAK2,PCBP2,DDX60,PML,PACS1,PYCARD,RAC1,DDX58,TNFAIP3
GO: Biological Process	GO:0000956	nuclear-transcribed mRNA catabolic process	2.114e-05	59	176	ATM,UPF2,CNOT10,EIF4A3,THRAP3,RBM8A,DDX6,EIF4B,EIF4G1,RNPS1,ETF1,EDC3,PAIP1,GSPT1,LSM3,LSM2,EIF3E,PABPC1,UPF3B,MAGOH,MLH1,CNOT7,NCBP1,RPL10A,CNOT3,CNOT2,EXOSC10,PPP2CA,PPP2R1A,DCP1B,UPF1,RPL10,RPL19,DCPS,XRN1,EDC4,RPS5,RPS9,RPS12,RPS10,RPLP1,RPS4X,RPS3A,RPS3,RPLP0,RPL22,RPS21,GSPT2,RPS27A,RPS15,RPS15A,RPS19,RPS16,TNKS1BP1,CASC3,DIS3,EXOSC7,CNOT1,EXOSC2
GO: Biological Process	GO:0010876	lipid localization	2.216e-05	83	270	ABCA1,AKT1,ABCD1,AKT2,ANXA1,APOB,APOA4,APOA2,APOE,APOC3,APOC2,VPS51,SLC25A20,CAV1,DGAT1,APOO,CETP,OSBPL2,CLU,ACSL5,CPT1A,GLTP,CPT2,COL4A3BP,FTO,SLC9A3R1,VPS4B,NCOR1,SLC27A3,SLC27A4,ACSL3,ACSL1,ACSL4,EHD1,CLN8,ATP8A1,GOT2,ABHD5,GM2A,SIGMAR1,HDLBP,HNRNPK,HEXA,HEXB,SLC27A1,ITGAV,LRP1,MSR1,MIF,NPC1,OSBP,SERPINA5,ATP8B2,NFKB1,ATP11C,PON1,MAPK9,PRKAB2,ENPP1,PLTP,PITPNA,APOBR,APOM,PSAP,PTPN11,SORL1,SOAT…
GO: Biological Process	GO:2000116	regulation of cysteine-type endopeptidase activity	2.47e-05	64	196	RIPK1,FAM162A,TRADD,AKT1,AKT2,APAF1,ARRB1,AIFM1,PRDX5,BAK1,BAX,FOXL2,C6,C9,CASP1,CASP7,CASP8,CDH1,CD44,CDKN1B,PDCD6,DNAJB6,CRYAB,DDX3X,DPEP1,PPM1F,PRDX3,GNB2L1,RPS27L,FIS1,HTT,GPX1,GPI,HIP1,HTRA2,IGBP1,IFI16,JAK2,SMAD3,MEN1,MAP3K5,MGMT,PAK2,MICAL1,POR,MAPK9,NLRP2,PML,PCID2,SERPINB9,PYCARD,S100A9,S100A8,RPS6KA1,RPS6KA3,MTCH1,RPS3,THBS1,USP47,TNFAIP3,SRC,UACA,IFT57,VCP
GO: Biological Process	GO:0022610	biological adhesion	2.503e-05	255	1007	NRP1,NRP2,ACP5,ACTN1,ACTN2,ADAM10,ADA,CTNNAL1,SGCE,AEBP1,AGT,VNN1,ALCAM,ALOX15,AMBP,ANK3,APOA4,ARF6,AATF,ARHGAP6,ARHGAP5,ARHGDIB,ARHGDIA,RHOB,ARVCF,ATP2A2,AZGP1,BCL2,PIP5K1A,DST,C1QBP,CALR,CASK,PPFIBP1,PKP4,ENTPD1,SCARB2,PRKD2,CD9,CDK6,RIC8A,CDH11,CDH3,CDH1,CDC42,AOC3,CD81,CD44,C22orf28,SPOCK2,CCR1,COL1A1,CNTN1,COL15A1,ARPC2,COL12A1,COL6A1,COL4A6,COL6A2,COL6A3,COL3A1,DNAJB6,CTNNA1,SORBS3,CTNND1,C…
GO: Biological Process	GO:0007160	cell-matrix adhesion	2.525e-05	54	158	ACTN1,ACTN2,SGCE,AGT,ARHGAP6,BCL2,PIP5K1A,CASK,CDK6,CD44,C22orf28,COL3A1,CTNNB1,DAG1,ROCK2,PPM1F,PTK2B,PLEKHA2,FN1,SORBS1,FBLN5,HRG,ITGB2,ITGB5,EPB41L5,ITGAV,ITGA1,ITGA3,ITGA6,ILK,SMAD3,BCAM,RAPH1,MMP14,NF1,NF2,NID1,PARVG,PDPK1,PIK3R1,RASA1,ROCK1,PTK2,RAC1,SIGLEC1,EPDR1,THY1,THBS1,TNXB,SRC,NID2,VCL,UTRN,TRIP6
GO: Biological Process	GO:0016477	cell migration	2.632e-05	235	919	AAMP,ABR,NRP1,NRP2,ACP5,ADAM10,ADA,AGT,AKT1,SGPL1,ARHGEF7,AIF1,AKT2,SPAG9,ANXA3,DOK2,APOB,APOE,LIMD1,APEX1,ARRB2,DCLK1,ARHGAP5,ARHGAP4,RHOG,SLC16A3,ATP1B1,SUN2,BAX,BCL2,PIP5K1A,STK24,NCK2,FMNL1,C1QBP,C5,CAMK2D,IKBKAP,CALR,CDC42BPA,CUL3,CAV1,PRKD2,RIC8A,CLIC4,AOC3,CDK1,CD74,CD44,DOCK4,CCR1,COL1A1,HDAC6,WASF2,CTNNB1,CTNNA2,ABI2,CTSH,MAPK14,CSNK2B,VCAN,CSPG4,LRRK2,DAB2,DAG1,AIMP1,CYP1B1,SLC9A3R1,DIA…
GO: Biological Process	GO:0006027	glycosaminoglycan catabolic process	2.685e-05	26	59	ARSB,BGN,CD44,VCAN,CSPG4,DCN,GPC4,FUCA1,FMOD,GLB1,GNS,GALNS,GUSB,AGRN,GPC1,HEXA,HEXB,IDS,HSPG2,LUM,OMD,OGN,NAGLU,PRELP,SGSH,PGLYRP2
GO: Biological Process	GO:0000302	response to reactive oxygen species	2.798e-05	52	151	ADA,ADRBK1,ALDH3A2,ANXA1,APOA4,APOE,APEX1,RHOB,PRDX5,BAK1,BCL2,BTK,CAT,AKR1C3,CDK2,CDK1,COL1A1,HDAC6,CRYAB,CRYGD,CYP11A1,PRDX6,DPEP1,PTK2B,PRDX3,FER,GSTP1,TXNIP,GPX1,TXNRD2,FBLN5,HMOX1,ITGAV,PARK7,MPO,MAP3K5,MMP2,PRDX1,PRKCA,PRKAA1,PPP2CB,PLCG1,PLD2,RELA,AGAP3,SOD3,SOD1,SHC1,EGLN1,PRDX2,TXNRD1,TPM1
GO: Biological Process	GO:0072358	cardiovascular system development	2.834e-05	213	823	AAMP,NRP1,NRP2,ACADM,FBXW8,ACTA2,ACTC1,ADD1,ADRBK1,AGT,AKT1,SGPL1,ALDH1A2,ANK2,ANXA3,ANPEP,BAZ1B,ANXA2,APOB,APOE,PLCD3,RHOB,ATM,NIPBL,RECK,FZD1,C6,C5,CAMK2D,CALR,CAV1,CASP7,CASP8,PRKD2,RIC8A,CLIC4,CDC42,CDK1,CHI3L1,CUL7,COL1A1,MED12,SUFU,CRKL,SLC12A6,COL15A1,COL4A1,COL3A1,COL4A3BP,COL4A2,WASF2,CTNNB1,CTSH,MAPK14,VCAN,CSPG4,AIMP1,CYP1B1,MMRN2,QKI,ERAP1,ECE1,TYMP,ATG5,ROCK2,ECM1,DSP,ENPEP,NCOR2,FBN…
GO: Biological Process	GO:0072359	circulatory system development	2.834e-05	213	823	AAMP,NRP1,NRP2,ACADM,FBXW8,ACTA2,ACTC1,ADD1,ADRBK1,AGT,AKT1,SGPL1,ALDH1A2,ANK2,ANXA3,ANPEP,BAZ1B,ANXA2,APOB,APOE,PLCD3,RHOB,ATM,NIPBL,RECK,FZD1,C6,C5,CAMK2D,CALR,CAV1,CASP7,CASP8,PRKD2,RIC8A,CLIC4,CDC42,CDK1,CHI3L1,CUL7,COL1A1,MED12,SUFU,CRKL,SLC12A6,COL15A1,COL4A1,COL3A1,COL4A3BP,COL4A2,WASF2,CTNNB1,CTSH,MAPK14,VCAN,CSPG4,AIMP1,CYP1B1,MMRN2,QKI,ERAP1,ECE1,TYMP,ATG5,ROCK2,ECM1,DSP,ENPEP,NCOR2,FBN…
GO: Biological Process	GO:0043631	RNA polyadenylation	2.841e-05	15	26	PNPT1,CSTF3,CSTF1,CDC73,PAPOLA,AHCYL1,CPSF6,NUDT21,GRSF1,PABPC1,FIP1L1,PAPOLG,CPSF1,PAF1,CSTF2T
GO: Biological Process	GO:0007155	cell adhesion	3.097e-05	253	1001	NRP1,NRP2,ACP5,ACTN1,ACTN2,ADAM10,ADA,CTNNAL1,SGCE,AEBP1,AGT,VNN1,ALCAM,ALOX15,AMBP,ANK3,APOA4,ARF6,AATF,ARHGAP6,ARHGAP5,ARHGDIB,ARHGDIA,RHOB,ARVCF,ATP2A2,AZGP1,BCL2,PIP5K1A,DST,C1QBP,CALR,CASK,PPFIBP1,PKP4,ENTPD1,SCARB2,PRKD2,CD9,CDK6,RIC8A,CDH11,CDH3,CDH1,CDC42,AOC3,CD44,C22orf28,SPOCK2,CCR1,COL1A1,CNTN1,COL15A1,ARPC2,COL12A1,COL6A1,COL4A6,COL6A2,COL6A3,COL3A1,DNAJB6,CTNNA1,SORBS3,CTNND1,CTNNB1…
GO: Biological Process	GO:0050684	regulation of mRNA processing	3.141e-05	24	53	C1QBP,SRSF9,CDK11B,EIF4A3,THRAP3,DDX5,CDC73,AHCYL1,RBM25,HNRNPA2B1,PRPF19,U2AF2,MBNL1,NCBP1,PTBP1,SFSWAP,SRSF7,TRA2B,SRSF4,SAFB,PAF1,TIA1,SRPK2,JMJD6
GO: Biological Process	GO:0019320	hexose catabolic process	3.276e-05	37	97	ALDOC,ALDOA,PGLS,H6PD,NCOR1,ENO2,FBP1,G6PD,FUT8,HIBADH,GLB1,GALT,GALE,GALK1,GPI,HK2,HK1,HK3,LDHA,MIF,LDHAL6A,OGDH,ADPGK,PRKAG1,PRKAA1,PGD,PGAM1,PGM5,PGM1,PFKM,PFKP,PFKL,PDHB,OGDHL,TKT,TALDO1,GLYR1
GO: Biological Process	GO:0006066	alcohol metabolic process	3.462e-05	99	338	DPM1,ABCA1,ACADL,ACADVL,ADH1B,ADH7,ADRBK2,MTMR2,ALDH1A1,ALDH1B1,ALDH3A2,APOB,APOA4,APOA2,APOE,APOC3,ALDH7A1,DAK,CAT,AKR1C3,PLA2G4C,SNX17,ISYNA1,IP6K1,CETP,CYB5R1,CYP11A1,CYP27A1,CYP7B1,CYB5R3,GGPS1,PCYT1B,INPP5K,SPTLC2,PTK2B,ACSL3,FECH,FDXR,FDPS,PNPLA6,EPHX2,CLN8,FABP5,G6PD,PLBD1,LPCAT1,ACAA2,GOT1,GALK1,SIGMAR1,GC,HDLBP,NSDHL,GPD2,HSD17B1,ENPP6,IDI1,SLC27A1,INPPL1,INPP5A,IMPA1,LRP1,LSS,LIPE,LIPA,…
GO: Biological Process	GO:0007033	vacuole organization	3.478e-05	27	63	ABCA1,ACP2,ARSB,ATP6V0C,WIPI2,FIG4,TPP1,CTSD,ATG9A,ATG5,CLN8,GAA,HEXA,HEXB,VPS18,MTM1,MAN2A1,NAGLU,PPT1,PIK3C3,AKTIP,ATG3,WDR45B,LAMTOR1,ATG4C,ATG4B,HOOK3
GO: Biological Process	GO:0043101	purine-containing compound salvage	3.496e-05	11	16	ADA,ADK,AMPD3,AMPD2,APRT,GMPR2,DGUOK,CECR1,GMPR,HPRT1,MTAP
GO: Biological Process	GO:0006541	glutamine metabolic process	3.508e-05	13	21	PHGDH,GGH,GMPS,ASL,CTPS1,GLS,GLUL,GFPT1,CTPS2,MECP2,PPAT,PFAS,ALDH5A1
GO: Biological Process	GO:0007584	response to nutrient	3.59e-05	58	175	ACAA1,ACADM,KYNU,ADSL,AGL,ALB,ALAD,ALPL,ALDH1A2,ALOX5,ARSA,ARSB,SERPINC1,BDH1,TXN2,BCKDHB,BCL2,GNPAT,FZD1,HAT1,CAV1,CAT,AKR1C3,COL1A1,ACSL5,COX4I1,DAD1,CYP11A1,DPYD,SLC27A4,ACSL3,ACSL1,ACSL4,MTOR,GNAI2,GGCX,GATM,GSN,HMOX1,HMGCL,HMBS,IL6ST,FADS1,MAP1B,MAPT,MGMT,MMP9,MED1,POR,PLEC,PIK3R1,RELA,RBP1,TFRC,SUOX,SERPINA7,STAT1,VLDLR
GO: Biological Process	GO:0048041	focal adhesion assembly	3.695e-05	21	44	ACTN1,ACTN2,ARHGAP6,BCL2,PIP5K1A,ROCK2,PPM1F,PTK2B,SORBS1,HRG,EPB41L5,ITGAV,SMAD3,MMP14,PDPK1,ROCK1,PTK2,THY1,THBS1,SRC,TRIP6
GO: Biological Process	GO:0019217	regulation of fatty acid metabolic process	3.767e-05	34	87	ACADL,ACADVL,AGT,AKT1,AKT2,ANXA1,APOA4,APOC3,APOC2,SLC25A20,CAV1,ACSL5,CPT1A,CPT2,DBI,DLD,CAB39,ACSL1,ACSL4,MTOR,CAB39L,MAPK9,PRKAG1,PRKAA1,PRKAB2,PRKAB1,PDHB,PDK3,PDK2,PDP1,PDPR,NR1H2,MLYCD,PDHX
GO: Biological Process	GO:0043488	regulation of mRNA stability	3.821e-05	19	38	SERBP1,APEX1,RBM10,CIRBP,THRAP3,MAPK14,DHX9,MAPKAPK2,ELAVL1,HNRNPA0,SYNCRIP,PAIP1,HNRNPU,HNRNPD,PABPC1,YBX1,PCID2,CARHSP1,TARDBP
GO: Biological Process	GO:0006997	nucleus organization	3.834e-05	26	60	SUN2,BAX,TOR1AIP1,AHCTF1,CDK1,NOLC1,TOR1A,NUP155,EMD,ZMPSTE24,AGFG1,HMGB2,TOR1B,LMNA,NUMA1,GOPC,PML,NUP133,SEH1L,PVRL2,AGAP3,SRPK2,CDAN1,SYNE1,SUN1,POLR1B
GO: Biological Process	GO:0032273	positive regulation of protein polymerization	3.834e-05	26	60	WASL,ARF6,NCK2,CAV1,EVL,CDKN1B,ARPC2,ACTR3,ARPC4,DLG1,PTK2B,FER,FES,MTOR,CORO1A,CDC42EP2,HCK,NCKAP1L,GRB2,MAP1B,MAPT,NCK1,PFN2,PYCARD,RAC1,SCIN
GO: Biological Process	GO:0006869	lipid transport	3.981e-05	75	242	ABCA1,AKT1,ABCD1,AKT2,ANXA1,APOB,APOA4,APOA2,APOE,APOC3,APOC2,VPS51,SLC25A20,CAV1,APOO,CETP,OSBPL2,CLU,ACSL5,CPT1A,GLTP,CPT2,COL4A3BP,SLC9A3R1,VPS4B,NCOR1,SLC27A3,SLC27A4,ACSL3,ACSL1,ACSL4,CLN8,ATP8A1,GOT2,GM2A,SIGMAR1,HDLBP,HNRNPK,SLC27A1,ITGAV,LRP1,MSR1,MIF,NPC1,OSBP,SERPINA5,ATP8B2,NFKB1,ATP11C,PON1,MAPK9,PRKAB2,PLTP,PITPNA,APOBR,APOM,PSAP,PTPN11,SORL1,SOAT1,STX12,SCP2,APOL2,PITPNB,LAMTOR1,THB…
GO: Biological Process	GO:0001701	in utero embryonic development	4.003e-05	106	368	FBXW8,ADAM10,ADA,ADD1,AKT1,EIF2S2,APOB,PLOD3,PLCD3,ATP1B1,C6,C5,COPS3,CAPN2,CUL3,RIC8A,SIN3A,CDH1,CDK11B,C22orf28,SETDB1,MFN2,COL4A3BP,DNAJB6,CTNNB1,TRIM28,RDH10,DDX5,DAB2,DAD1,INPP5K,DUSP3,ENDOG,NCOR2,EGFR,TMED2,NCKAP1,FUT8,GAB1,GABPA,KIF3A,TAB1,GNA13,NSDHL,GRB2,PRMT1,PRPF19,RBPJ,EPB41L5,ITGAV,INPP5B,SMAD2,SMAD3,SMAD4,KIDINS220,BIRC6,MSH2,CCM2,MBNL1,MAN2A1,MGAT1,XAB2,YBX1,OCRL,MYH9,MYO1E,EPN1,NA…
GO: Biological Process	GO:0042254	ribosome biogenesis	4.047e-05	56	168	ABCF1,GNL3,AATF,RRP9,C1QBP,EIF4A3,NOP58,MPHOSPH10,NOC4L,EFTUD1,NOLC1,DDX3X,NOL9,IPO4,DKC1,NUDT16,WBP11,GEMIN4,FBL,UTP14A,FRG1,WDR36,GNL1,UTP18,NPM3,TBL3,NOP56,UTP20,NOL6,EIF2A,PA2G4,NOP2,LSG1,EXOSC10,TSR1,IPO9,UTP6,NOB1,GTPBP10,GTPBP4,RPLP0,RPS21,RPS15,RPS19,RPS16,HEATR1,SDAD1,DIS3,EXOSC7,PDCD11,MINA,EXOSC2,UTP15,IMP4,SKIV2L2,RRS1
GO: Biological Process	GO:0001101	response to acid	4.251e-05	37	98	AARS,ANXA2,BAX,BCL2,LAMTOR3,CDH1,COL1A1,COL5A2,COL6A1,COL4A6,COL4A1,COL3A1,CYP11A1,DNMT1,DNMT3A,MTOR,GSN,GSS,HMBS,ICAM1,LYN,MSH2,MGMT,MMP2,OXCT1,UBR1,RRAGC,PDGFRA,PIK3C3,PIK3R1,RELA,LAMTOR2,LGMN,SLC1A3,S100A10,LAMTOR1,HIST1H2BA
GO: Biological Process	GO:2001242	regulation of intrinsic apoptotic signaling pathway	4.461e-05	14	24	RIPK1,BAX,CAV1,BCLAF1,CLU,DNM1L,DDX3X,GNB2L1,FIS1,HTRA2,OPA1,PYCARD,SRC,VDAC2
GO: Biological Process	GO:0060249	anatomical structure homeostasis	4.47e-05	69	219	FBXO4,SERPINA3,ACACA,ACP5,ADD1,PARP1,AHSG,ALDOA,ATM,PRDX5,BAX,BCL2,CA2,GIGYF2,POT1,TPP1,RAD50,CTNNB1,CTSS,CTSH,CSK,DKC1,DMD,PTK2B,FEN1,FH,ERCC4,CTC1,CORO1A,GAA,XRCC6,LPCAT1,WDR36,GNAS,PTGES3,ITGAV,LIPA,MRE11A,MTM1,PCNA,NBN,NF1,POLD1,PRKDC,PPP3CB,PFKM,PDGFRB,PML,PLG,RFC2,RFC5,RFC4,RAC1,RAC2,YLPM1,XRN1,SASH3,SOD1,TERF2IP,TNFAIP3,TEP1,TF,TFRC,FGGY,SYK,TNKS1BP1,SRC,HAAO,NCDN
GO: Biological Process	GO:0051348	negative regulation of transferase activity	4.554e-05	60	184	ADAR,AKT1,APOE,CAV1,POT1,CDKN1B,TAOK3,CSK,INPP5K,DUSP9,DUSP3,PPM1F,PRDX3,CLN8,CHP1,GNB2L1,GNAQ,GMFB,GBAS,SNX6,GSTP1,GPS1,PDCD4,KNG1,INPPL1,STK38,ILK,LYN,CHORDC1,WNK1,MEN1,MLLT1,PAK2,DEPTOR,AIDA,NF1,NF2,DNAJC3,PRKAR1A,PRKCA,PPP2CA,PPP2R1A,PDPK1,PML,TRIM27,PYCARD,PHPT1,PRPSAP1,PTPN6,PTPRC,DAB2IP,THY1,TNFAIP3,NR2F2,TAF7,YWHAG,UCHL1,TSC2,UBASH3B,AKT1S1
GO: Biological Process	GO:0043281	regulation of cysteine-type endopeptidase activity involved in apoptotic process	4.661e-05	61	188	RIPK1,FAM162A,TRADD,AKT1,AKT2,APAF1,ARRB1,AIFM1,PRDX5,BAK1,BAX,FOXL2,C6,C9,CASP1,CASP7,CASP8,CDH1,CD44,CDKN1B,PDCD6,DNAJB6,CRYAB,DDX3X,DPEP1,PPM1F,PRDX3,GNB2L1,RPS27L,FIS1,GPX1,GPI,HIP1,HTRA2,IGBP1,JAK2,SMAD3,MEN1,MAP3K5,MGMT,PAK2,MICAL1,POR,MAPK9,NLRP2,PML,SERPINB9,PYCARD,S100A9,S100A8,RPS6KA1,RPS6KA3,MTCH1,RPS3,THBS1,USP47,TNFAIP3,SRC,UACA,IFT57,VCP
GO: Biological Process	GO:0043624	cellular protein complex disassembly	4.88e-05	56	169	NAPA,ADD1,ARHGEF2,CAPG,CAPZA1,CAPZA2,CAPZB,EVL,LIMA1,NEDD1,CFL2,HDAC6,TRPV4,ETF1,TRIOBP,GSN,SPTBN4,STMN1,MAP1B,MAP1A,MTPN,MICAL1,RPL10A,TMOD3,PEX14,PLEK,UPF1,RDX,RPL10,RPL19,TWF1,RPS5,RPS9,RPS12,RPS10,RPLP1,RPS4X,RPS3A,RPS3,RPLP0,RPL22,RPS21,GSPT2,RPS27A,RPS15,RPS15A,RPS19,RPS16,SPTB,SPTBN1,SPTA1,SPTAN1,SPTBN2,SCIN,TPM1,CLASP1
GO: Biological Process	GO:0046835	carbohydrate phosphorylation	4.914e-05	10	14	GNPTAB,GALK2,GALK1,HK2,HK1,HK3,PFKM,PFKP,NAGK,PFKL
GO: Biological Process	GO:0072350	tricarboxylic acid metabolic process	4.914e-05	10	14	ACO2,ACO1,ASL,CS,IDH3G,IDH3B,IDH3A,IDH2,IDH1,STAT5A
GO: Biological Process	GO:0097006	regulation of plasma lipoprotein particle levels	4.95e-05	23	51	ABCA1,AGT,APOB,APOA4,APOA2,APOE,APOC3,APOC2,DGAT1,CETP,CSK,ACSL3,FECH,EHD1,HMOX1,HNRNPK,LRPAP1,MPO,MSR1,APOM,SOAT1,VLDLR,NR1H2
GO: Biological Process	GO:0051495	positive regulation of cytoskeleton organization	4.955e-05	41	113	WASL,ARF6,NCK2,CAV1,EVL,CDKN1B,ARPC2,ACTR3,ARPC4,SORBS3,DLG1,ARHGEF10,PPM1F,PTK2B,FER,FES,TRPV4,MTOR,CORO1A,CDC42EP2,HCK,NCKAP1L,HCLS1,GRB2,SYNPO,SMAD3,MAP1B,MAPT,PAK1,NCK1,NF2,PFN2,PFN1,PLXNA3,SERPINF2,PLEK,FHOD1,PYCARD,RAC1,SCIN,TPM1
GO: Biological Process	GO:0030048	actin filament-based movement	4.961e-05	34	88	ACTC1,ACTN2,ANK2,WASL,ATP1A1,ATP1A2,SUN2,MYL6B,EVL,WASF2,MYH14,DMD,DES,DSP,DSG2,NUP155,JUP,EPB41L5,MYO1B,MYH9,MYL6,MYO6,MYO5A,MYO1E,MYO9B,PARVA,ROCK1,TMOD1,FNBP1L,VIM,WAS,TPM1,TPM4,TPM3
GO: Biological Process	GO:0048255	mRNA stabilization	5.202e-05	15	27	RBM10,CIRBP,THRAP3,MAPK14,DHX9,MAPKAPK2,ELAVL1,HNRNPA0,SYNCRIP,PAIP1,HNRNPU,HNRNPD,PABPC1,YBX1,TARDBP
GO: Biological Process	GO:1900077	negative regulation of cellular response to insulin stimulus	5.202e-05	15	27	AHSG,INPP5K,GRB14,INPPL1,YBX1,PRKCA,PRKCB,PRKAA1,ENPP1,RELA,PTPN1,PTPRE,PTPRF,PID1,KANK1
GO: Biological Process	GO:0043489	RNA stabilization	5.202e-05	15	27	RBM10,CIRBP,THRAP3,MAPK14,DHX9,MAPKAPK2,ELAVL1,HNRNPA0,SYNCRIP,PAIP1,HNRNPU,HNRNPD,PABPC1,YBX1,TARDBP
GO: Biological Process	GO:0032386	regulation of intracellular transport	5.347e-05	72	232	PARP1,MTMR2,ANK2,ANK3,ASPH,FZD1,CAMK2D,CALM3,CDH1,CDC42,CDK1,G3BP2,SUFU,UBR5,MAPK14,CRYAB,CSK,NOLC1,DAB2,CYLD,INPP5K,EMD,EGFR,ACSL3,CHP1,MTOR,TMEM173,FLNA,FAF1,RBPMS,TACC3,LYPLA1,GNAQ,SH3GLB1,HCLS1,KHDRBS1,CHERP,HSP90AB1,LYPLAL1,JUP,JAK2,SMAD3,SMAD4,MAVS,LCP1,MAP1B,MAPT,PRDX1,PPP1R12A,GOPC,NEDD4,NF1,PPP1CC,MED1,MAP2K1,MAP2K2,MAPK3,MAPK1,PRKACA,XPO4,RANGAP1,PTPN11,DAB2IP,DDX58,SCP2,TLR2,UACA,XPO1,…
GO: Biological Process	GO:0002682	regulation of immune system process	5.86e-05	238	943	A2M,ABR,RIPK1,ADAM10,ADA,AP3D1,ADK,AP1M1,AP1S2,AP2B1,AP1B1,AP2A2,AP2A1,AP1G1,VNN1,AKT1,AIF1,AMBP,ANXA1,APOA2,ARF6,ARRB2,ATM,SART1,BCL2,BTK,NCK2,CA2,C1R,C1QC,C2,C1QBP,SERPING1,C6,C7,C8A,C8B,C8G,C9,C4BPA,C5,CALR,THOC5,CACNB3,AP3B1,PIAS1,LSM14A,CAV1,CASP8,PRKD2,CD14,CDK6,SAMHD1,SIN3A,CDH1,CDC42,AOC3,CDK1,CD81,CD74,CD44,CD59,ELMO1,CCR1,ATP6V1H,AP2M1,CLU,CLPTM1,COL3A1,SPG21,MAP3K8,UNC13D,CTNNB1,CTSH,M…
GO: Biological Process	GO:1900076	regulation of cellular response to insulin stimulus	5.877e-05	20	42	AHSG,AKT2,C2CD5,INPP5K,GRB14,INPPL1,YBX1,PRKCA,PRKCB,PRKAA1,ENPP1,RELA,PTPN1,PTPN11,PTPRE,PTPRF,PID1,SRC,TSC2,KANK1
GO: Biological Process	GO:1901185	negative regulation of ERBB signaling pathway	5.877e-05	20	42	AP2B1,AP2A2,AP2A1,ARHGEF7,HGS,CBL,CDC42,AP2M1,CLTA,CLTC,EGFR,EPS15,EPS15L1,SNX6,GRB2,EPN1,PTPRF,DAB2IP,RPS27A,STAM
GO: Biological Process	GO:0042059	negative regulation of epidermal growth factor receptor signaling pathway	5.877e-05	20	42	AP2B1,AP2A2,AP2A1,ARHGEF7,HGS,CBL,CDC42,AP2M1,CLTA,CLTC,EGFR,EPS15,EPS15L1,SNX6,GRB2,EPN1,PTPRF,DAB2IP,RPS27A,STAM
GO: Biological Process	GO:0006739	NADP metabolic process	6.001e-05	17	33	PGLS,PRDX5,H6PD,FDXR,G6PD,HIBADH,DCXR,IDH1,NADKD1,NUDT12,NCF2,PGD,PGAM1,TKT,TALDO1,GLYR1,TXNRD1
GO: Biological Process	GO:0006767	water-soluble vitamin metabolic process	6.001e-05	28	68	ACP5,VNN1,NFS1,RGN,BTD,PDXK,AASDHPPT,PPCDC,THTPA,CYB5A,CYB5R3,FASN,COASY,FLAD1,GCLC,AKR1A1,GPHN,TPK1,MTHFD1,MTHFR,MCCC1,ENPP1,SLC2A1,SHMT1,TCN2,PNPO,QPRT,NAPRT1
GO: Biological Process	GO:0043241	protein complex disassembly	6.031e-05	57	174	NAPA,ADD1,ARHGEF2,CAPG,CAPZA1,CAPZA2,CAPZB,EVL,LIMA1,NEDD1,CFL2,HDAC6,TRPV4,ETF1,TRIOBP,MGEA5,GSN,SPTBN4,STMN1,MAP1B,MAP1A,MTPN,MICAL1,RPL10A,TMOD3,PEX14,PLEK,UPF1,RDX,RPL10,RPL19,TWF1,RPS5,RPS9,RPS12,RPS10,RPLP1,RPS4X,RPS3A,RPS3,RPLP0,RPL22,RPS21,GSPT2,RPS27A,RPS15,RPS15A,RPS19,RPS16,SPTB,SPTBN1,SPTA1,SPTAN1,SPTBN2,SCIN,TPM1,CLASP1
GO: Biological Process	GO:0051291	protein heterooligomerization	6.33e-05	36	96	RIPK1,TRADD,SQSTM1,ALDOC,KCNAB2,CASP8,SEPT7,COL1A1,RAD50,COL6A1,COL6A2,CTNNA1,CTNNB1,CAB39,SEPT9,GCHFR,GRB2,IDE,JUP,ILK,PCBD1,MAP2K1,PRKCSH,PRKAG1,PRKAR2A,PRKAA1,PRKAB1,PPP5C,PPP2CA,PARVA,SEPT11,RRM1,STXBP3,YWHAB,UQCRB,TSC2
GO: Biological Process	GO:0016125	sterol metabolic process	6.608e-05	45	129	ABCA1,ACADL,ACADVL,APOB,APOA4,APOA2,APOE,APOC3,CAT,SNX17,CETP,CYB5R1,CYP11A1,CYP27A1,CYP7B1,CYB5R3,GGPS1,FECH,FDXR,FDPS,EPHX2,CLN8,G6PD,ACAA2,SIGMAR1,HDLBP,NSDHL,IDI1,LRP1,LSS,LIPE,LIPA,LEPR,LBR,NPC1,POR,PON1,PRKAA1,APOBR,SORL1,SOD1,SOAT1,APOL2,VLDLR,OSBPL1A
GO: Biological Process	GO:0019388	galactose catabolic process	6.692e-05	6	6	GLB1,GALT,GALE,GALK1,PGM5,PGM1
GO: Biological Process	GO:0006102	isocitrate metabolic process	6.692e-05	6	6	ACO2,IDH3G,IDH3B,IDH3A,IDH2,IDH1
GO: Biological Process	GO:2000641	regulation of early endosome to late endosome transport	6.692e-05	6	6	MTMR2,DAB2,MAP2K1,MAP2K2,MAPK3,MAPK1
GO: Biological Process	GO:0046060	dATP metabolic process	6.692e-05	6	6	ADA,ADK,AK2,GUK1,MGEA5,AK3
GO: Biological Process	GO:0006189	'de novo' IMP biosynthetic process	6.692e-05	6	6	ADSL,ATIC,GART,PAICS,PPAT,PFAS
GO: Biological Process	GO:0006935	chemotaxis	6.936e-05	165	624	NRP1,NRP2,ACTG1,ADAM10,AP2B1,AP2A2,AP2A1,AIF1,ALCAM,AKT2,ANK2,ANK3,WASL,RPS6KA4,ARRB2,RHOG,RHOB,USP14,PIP5K1A,NCK2,C1QBP,C5,CALR,CACNB3,PRKD2,NUMB,CDC42,CDK1,CD74,EVL,DOCK4,CHN1,ARHGEF11,CCR1,COL1A1,CNTN1,AP2M1,CLTA,CLTC,CRMP1,COL5A2,COL6A1,COL6A2,COL6A3,COL4A1,COL3A1,COL4A2,PLXNC1,MAPK14,FLOT1,CSNK2A2,CSNK2B,AIMP1,DLG1,MYH14,TYMP,ROCK2,DPYSL3,DPYSL2,DOCK2,DOCK1,PPM1F,EGFR,PTK2B,STIP1,FER,FES,ERB…
GO: Biological Process	GO:0048870	cell motility	6.987e-05	250	999	AAMP,ABR,NRP1,NRP2,ACP5,ADAM10,ADA,AGT,AKT1,SGPL1,ARHGEF7,AIF1,AKT2,SPAG9,ANXA3,DOK2,APOB,APOE,LIMD1,APEX1,ARRB2,DCLK1,ARHGAP5,ARHGAP4,RHOG,SLC16A3,ATP1B1,SUN2,BAX,BCL2,PIP5K1A,STK24,NCK2,DST,FMNL1,C1QBP,C5,CAMK2D,IKBKAP,CALR,CDC42BPA,CUL3,CAV1,PRKD2,CDK6,RIC8A,CLIC4,AOC3,CDK1,CD74,CD44,DOCK4,CCR1,COL1A1,HDAC6,WASF2,CTNNB1,CTNNA2,ABI2,CTSH,MAPK14,CSNK2B,VCAN,CSPG4,LRRK2,DAPK3,DAB2,DAG1,AIMP1,CYP1…
GO: Biological Process	GO:0051674	localization of cell	6.987e-05	250	999	AAMP,ABR,NRP1,NRP2,ACP5,ADAM10,ADA,AGT,AKT1,SGPL1,ARHGEF7,AIF1,AKT2,SPAG9,ANXA3,DOK2,APOB,APOE,LIMD1,APEX1,ARRB2,DCLK1,ARHGAP5,ARHGAP4,RHOG,SLC16A3,ATP1B1,SUN2,BAX,BCL2,PIP5K1A,STK24,NCK2,DST,FMNL1,C1QBP,C5,CAMK2D,IKBKAP,CALR,CDC42BPA,CUL3,CAV1,PRKD2,CDK6,RIC8A,CLIC4,AOC3,CDK1,CD74,CD44,DOCK4,CCR1,COL1A1,HDAC6,WASF2,CTNNB1,CTNNA2,ABI2,CTSH,MAPK14,CSNK2B,VCAN,CSPG4,LRRK2,DAPK3,DAB2,DAG1,AIMP1,CYP1…
GO: Biological Process	GO:0007034	vacuolar transport	7.192e-05	23	52	ARSB,RHOB,HGS,VPS26B,STX7,AP3B1,SCARB2,ZFYVE16,VPS29,VPS26A,DSCR3,M6PR,AP3M1,SNX27,MTM1,NPC1,NEDD4,SCYL2,AKTIP,KIF13A,SORT1,TSG101,HOOK3
GO: Biological Process	GO:0048284	organelle fusion	7.192e-05	23	52	ANXA1,ANXA2,DYSF,BAK1,BAX,TECPR1,EEA1,STX7,WIPI2,CDK1,USO1,C2CD5,MFN2,AFG3L2,VCPIP1,VAV3,VAT1,GNAI3,RAB8A,OPA1,MFN1,PID1,OMA1
GO: Biological Process	GO:0043149	stress fiber assembly	7.192e-05	23	52	ARRB1,ARHGAP6,CUL3,KANK2,SORBS3,INPP5K,ROCK2,ARHGEF10,PPM1F,PTK2B,MTOR,SORBS1,SYNPO,SMAD3,PAK1,KANK3,NF2,PFN1,SERPINF2,FHOD1,ROCK1,ARAP1,TPM1
GO: Biological Process	GO:0072593	reactive oxygen species metabolic process	7.375e-05	47	137	ACP5,RIPK1,AGT,AOX1,APOA4,AATF,PRDX5,BCL2,CAT,AKR1C3,HDAC6,MAPK14,CRYAB,CYBB,NQO1,PRDX6,SH3PXD2A,PTK2B,PRDX3,EPHX2,F2,NDUFA13,GSTP1,GPX1,FBLN5,GRB2,PRDX4,PARK7,PREX1,MPO,PRDX1,NCF2,NDUFS1,NDUFS3,PDK3,PDGFRB,RAC1,RAC2,SOD3,SOD1,TGFBR2,THBS1,PID1,PRDX2,SYK,TXNRD1,NNT
GO: Biological Process	GO:0042330	taxis	7.579e-05	165	625	NRP1,NRP2,ACTG1,ADAM10,AP2B1,AP2A2,AP2A1,AIF1,ALCAM,AKT2,ANK2,ANK3,WASL,RPS6KA4,ARRB2,RHOG,RHOB,USP14,PIP5K1A,NCK2,C1QBP,C5,CALR,CACNB3,PRKD2,NUMB,CDC42,CDK1,CD74,EVL,DOCK4,CHN1,ARHGEF11,CCR1,COL1A1,CNTN1,AP2M1,CLTA,CLTC,CRMP1,COL5A2,COL6A1,COL6A2,COL6A3,COL4A1,COL3A1,COL4A2,PLXNC1,MAPK14,FLOT1,CSNK2A2,CSNK2B,AIMP1,DLG1,MYH14,TYMP,ROCK2,DPYSL3,DPYSL2,DOCK2,DOCK1,PPM1F,EGFR,PTK2B,STIP1,FER,FES,ERB…
GO: Biological Process	GO:0090150	establishment of protein localization to membrane	7.801e-05	22	49	AKT1,ANK2,ANK3,ARF6,RHOG,BID,PIP5K1A,DLG1,INPP5K,TMED2,GNB2L1,MYL12A,SORBS1,KIF5B,SPTBN4,PDPK1,PACS1,PIK3R1,PID1,SPTBN1,EHD3,PACS2
GO: Biological Process	GO:0046474	glycerophospholipid biosynthetic process	7.91e-05	62	195	DPM1,MTMR1,MTMR2,APOA2,ATM,MTMR6,PIP5K1A,GNPAT,DGAT1,PLA2G4C,CD81,FIG4,PIGT,LPGAT1,PIGK,ALG12,ALG9,PCYT1B,INPP5K,ACSL3,FABP5,PLBD1,LPCAT1,ABHD5,SH3GLB1,CDIPT,HADHB,HADHA,GPD1,AGPAT1,SLC27A1,INPPL1,MGLL,INPP4A,IMPA1,MTM1,OCRL,AGPAT3,SLC44A2,PCYT1A,VAC14,PLD1,PLCG2,PLD2,PIK3C2A,PIK3CA,PIK3C3,PIK3R1,PI4KA,PIP4K2A,MTMR14,PCYT2,GPCPD1,PLD3,PIGN,PITPNB,PIGS,SACM1L,SLC44A1,GPD1L,LPIN1,PIK3R4
GO: Biological Process	GO:0019319	hexose biosynthetic process	8.173e-05	28	69	ACADM,ALDOC,ALDOA,SLC25A11,SLC25A12,GNPDA1,SLC25A13,ENO2,FBP1,GOT2,GOT1,GPD2,GPI,GPD1,GNMT,MDH1,MDH2,PCK2,PC,SMEK2,PRKACG,PRKACB,PRKACA,PGAM1,SMEK1,PMM2,SLC25A1,SORD
GO: Biological Process	GO:0051654	establishment of mitochondrion localization	8.234e-05	8	10	LRPPRC,RHOT2,MAP1B,MAPT,PVRL2,RHOT1,MAP1S,KIF1B
GO: Biological Process	GO:0007016	cytoskeletal anchoring at plasma membrane	8.234e-05	8	10	CTNNB1,DAG1,FLNB,SPTBN4,JUP,TLN2,TLN1,EZR
GO: Biological Process	GO:0046627	negative regulation of insulin receptor signaling pathway	8.258e-05	14	25	AHSG,INPP5K,GRB14,INPPL1,YBX1,PRKCA,PRKCB,ENPP1,RELA,PTPN1,PTPRE,PTPRF,PID1,KANK1
GO: Biological Process	GO:0019058	viral infectious cycle	8.378e-05	69	223	ADAR,SLC25A6,BCL2,NELFB,NELFCD,CDK9,CTBP2,CTBP1,VAPB,DDX5,NMT2,RSF1,INPP5K,SUPT16H,VPS28,GTF2F2,HTATSF1,IFIT1,IFI16,KPNA1,KPNB1,MAVS,MX1,ZC3HAV1,MNAT1,OAS1,NCBP1,RPL10A,NFIA,POLR2C,POLR2E,POLR2G,POLR2H,POLR2A,POLR2B,PFN1,RAN,RPL10,RPL19,RAD23A,SMARCB1,SMARCA4,RPS5,RPS9,RPS12,RPS10,RPLP1,RPS4X,RPS3A,RPS3,RPLP0,RPL22,RPS21,RPS27A,RPS15,RPS15A,RPS19,RPS16,TOP2A,TCEB1,SUPT5H,SSRP1,SRPK2,XPO1,NELFA,UB…
GO: Biological Process	GO:0030838	positive regulation of actin filament polymerization	8.385e-05	21	46	WASL,ARF6,NCK2,EVL,ARPC2,ACTR3,ARPC4,DLG1,PTK2B,FER,MTOR,CORO1A,CDC42EP2,HCK,NCKAP1L,GRB2,NCK1,PFN2,PYCARD,RAC1,SCIN
GO: Biological Process	GO:0035023	regulation of Rho protein signal transduction	8.598e-05	57	176	ABCA1,ABR,ARHGEF7,APOE,APOC3,ARRB1,ARHGAP5,ARHGAP4,RHOG,ARHGEF2,ARHGEF1,PIP5K1A,CUL3,PKP4,DOCK4,CHN1,ARHGEF11,CRK,FARP1,FLOT1,ARHGEF6,ARHGEF10,PTK2B,ITSN2,ERBB2,EPHB3,MTOR,AKAP13,FGD3,VAV3,CDC42EP2,NCKAP1L,AGRN,ARFGEF1,ARHGAP35,SPATA13,PREX1,MYO9B,PIN1,RAP1GDS1,PYCARD,PTK2,RAC1,ARAP1,PLXNB2,THY1,RASIP1,SYDE1,DOCK7,ARHGEF25,VAV1,SRGAP2,SCRIB,ARHGAP26,KANK1,DNMBP,TAX1BP3
GO: Biological Process	GO:1901700	response to oxygen-containing compound	8.675e-05	226	895	AARS,ABCA1,ABR,ACP5,ACTC1,ADA,ADD1,ADH7,ADRBK1,EIF2B2,EIF2B5,ALDH1A1,EIF2B4,EIF2B3,ALAD,GGH,ALDH3A2,ALPL,ALDH1A2,ANXA1,APOB,APOA4,APOA2,APOE,APEX1,ARSA,ARRB1,RHOB,ASPH,BDH1,BID,PRDX5,BAK1,TXN2,BCKDHB,BCL2,BTK,GNPAT,FZD1,CALR,CAV1,CASP1,CASP8,CAT,LAMTOR3,AKR1C3,CD14,CD9,CDK2,SIN3A,CDH1,CDK1,CCR1,COL1A1,ACSL5,HDAC6,ACTR3,COL5A2,COL6A1,COL4A6,COL6A2,COL6A3,COL4A1,COL3A1,SCAMP3,COMT,CTNNA1,CTNNB1,CTS…
GO: Biological Process	GO:0047497	mitochondrion transport along microtubule	8.881e-05	7	8	LRPPRC,RHOT2,MAP1B,MAPT,RHOT1,MAP1S,KIF1B
GO: Biological Process	GO:0006002	fructose 6-phosphate metabolic process	8.881e-05	7	8	GNPDA1,FBP1,GFPT1,PFKM,PFKP,PFKL,TALDO1
GO: Biological Process	GO:0034643	establishment of mitochondrion localization, microtubule-mediated	8.881e-05	7	8	LRPPRC,RHOT2,MAP1B,MAPT,RHOT1,MAP1S,KIF1B
GO: Biological Process	GO:0032507	maintenance of protein location in cell	8.961e-05	37	101	ANK3,BUB3,SUN2,CAV1,CDC42,G3BP2,SUFU,CTNNB1,DAG1,DBN1,OS9,NR5A1,FLNA,FLNB,FAF1,TACC3,PDIA3,SPTBN4,JUP,TLN2,PCM1,GOPC,PEX14,PML,SYNE3,SEH1L,ARL2BP,TLN1,YWHAB,EZR,TRIP6,CLASP1,SYNE1,SUN1,CHAMP1,MORC3,HOOK3
GO: Biological Process	GO:0006641	triglyceride metabolic process	9.113e-05	40	112	ACACA,APOB,APOA4,APOA2,APOE,APOC3,APOC2,CAV1,CAT,DGAT1,CETP,ACSL5,CPT1A,DBI,FASN,ACSL3,ACSL1,ACSL4,LPCAT1,ABHD5,GPX1,GPD1,AGPAT1,IL6ST,MGLL,LIPE,AGPAT3,PPP1CC,PPP1CA,PRKACG,PRKACB,PRKACA,APOBR,PTPN11,SLC25A1,TNXB,NR1H2,ACSL6,GPD1L,LPIN1
GO: Biological Process	GO:0050690	regulation of defense response to virus by virus	9.118e-05	15	28	AP1M1,AP1S2,AP2B1,AP1B1,AP2A2,AP2A1,AP1G1,ELMO1,ATP6V1H,AP2M1,DOCK2,HCK,PAK2,PACS1,RAC1
GO: Biological Process	GO:0006206	pyrimidine nucleobase metabolic process	9.598e-05	16	31	CDA,CRMP1,DCTD,TYMP,UPB1,DUT,DPYSL3,DPYSL2,DPYD,DPYSL4,ALDH6A1,NT5E,MAPK1,UPP1,UMPS,NT5C
GO: Biological Process	GO:0045088	regulation of innate immune response	9.745e-05	73	240	A2M,RIPK1,ARF6,ARRB2,BTK,C1QBP,SERPING1,PIAS1,LSM14A,CASP8,CD14,SAMHD1,SIN3A,CDK1,CD74,CCR1,MAPK14,MAPKAPK2,CYLD,ERAP1,DUSP3,FGR,CDC37,TMEM173,TAB1,HCK,HSP90AB1,HPX,IFI16,JAK2,JAK1,IRF3,LYN,MAVS,MYO1F,ZC3HAV1,ITCH,NFKB2,NFKB1,MED1,MAP2K1,MAP2K2,MAP2K3,MAPK9,MAP2K6,MAPK3,MAPK1,DDX60,PDPK1,RELA,TBK1,PYCARD,PTPN1,PTPN11,PTPN6,PVRL2,MAP2K4,DDX58,RPS6KA1,RPS6KA2,RPS6KA3,CADM1,RPS27A,TLR2,TNFAIP3,TRIM5…
GO: Biological Process	GO:0009225	nucleotide-sugar metabolic process	9.754e-05	17	34	DPM1,CMAHP,GALT,GFPT1,GUK1,MGAT1,MPI,UGGT1,GMPPB,GMPPA,GNPNAT1,PGM3,PMM2,CMAS,UGP2,UGDH,TSTA3
GO: Biological Process	GO:0045185	maintenance of protein location	9.786e-05	41	116	ANK3,BUB3,SUN2,CAV1,CDC42,G3BP2,SUFU,CTNNB1,DAG1,DBN1,FBN1,OS9,NR5A1,FLNA,FLNB,FAF1,TACC3,PDIA3,SPTBN4,JUP,LTBP1,TLN2,PCM1,GOPC,PFN1,PEX14,PML,SYNE3,SEH1L,TWF1,ARL2BP,TLN1,YWHAB,EZR,TRIP6,CLASP1,SYNE1,SUN1,CHAMP1,MORC3,HOOK3
GO: Biological Process	GO:0006446	regulation of translational initiation	0.000103	23	53	EIF2B2,EIF2B5,EIF2B4,EIF2B3,EIF3H,EIF3B,TRMT6,DDX3X,DDX1,EIF4B,EIF4G1,EIF4G2,EIF5,EIF5B,EIF2S1,EIF2B1,FECH,FMR1,EIF1B,EIF3K,EIF3E,NCBP1,EIF4H
GO: Biological Process	GO:0006259	DNA metabolic process	0.0001055	231	920	FBXO4,BANF1,FBXO6,ACTL6A,PARP1,MBD4,MCM3AP,NAE1,ANXA3,APAF1,BAZ1B,APEX1,ATM,AIFM1,SMC3,USP10,ATRX,BAX,SMC1A,FOXL2,HAT1,CALR,SMARCA5,CUL4B,CUL4A,PPFIBP2,PRKD2,POT1,CDK2,RUVBL1,SIN3A,CDC42,SH2B1,CDK1,CDK9,CETN2,BRCC3,PARP3,PARP2,RAD50,HUWE1,TAOK3,TRIM28,UCHL5,UBR5,PSMD14,H2AFV,FTO,DDB1,MTA2,DDX1,TRIP12,NEIL2,DNASE1L1,LONP1,DNMT1,DNMT3A,DKC1,CENPV,RSF1,NUDT16,TYMP,DUT,CHD1L,H2AFY,BRE,ENDOG,EGFR,FEN1…
GO: Biological Process	GO:0051272	positive regulation of cellular component movement	0.0001067	81	273	AAMP,NRP1,NRP2,ACP5,ACTN4,ADAM10,AGT,AKT1,AIF1,AKT2,SPAG9,ANXA3,ARHGAP5,SUN2,BCL2,C1QBP,CAMK2D,IKBKAP,CALR,PRKD2,AOC3,CD74,CCR1,COL1A1,HDAC6,CTSH,MAPK14,DAB2,DIAPH1,PPM1F,EGFR,PTK2B,FGR,FER,CORO1A,MIA3,GNB2L1,COL18A1,NCKAP1L,IL6ST,ICAM1,JAK2,EPB41L5,ITGAV,ITGA5,ILK,LYN,SMAD3,LAMB1,STMN1,MYO1F,MIF,MMP14,MMP9,MYLK,MAP2K1,MAP2K2,PRKD1,MAPK1,PRKCA,PDGFRB,PDGFRA,PLCG1,PLD1,PLD2,PIK3R1,RARRES2,PYCARD,P…
GO: Biological Process	GO:0006952	defense response	0.0001071	291	1190	A2M,SERPINA3,ABCF1,ABR,ACP5,AK7,RIPK1,ADAR,ADA,KYNU,AP1M1,AP1S2,AP2B1,AP1B1,AP2A2,AP2A1,AP1G1,AGT,VNN1,AKT1,AHSG,AIF1,ALOX15,ALOX5,ANXA3,APAF1,AOX1,SLC25A6,ANXA1,APOA4,APOA2,APOE,APCS,ARF6,RPS6KA4,ARRB2,SERPINC1,PRDX5,BCL2,BTK,C1R,C1QC,C2,C1QBP,SERPING1,C6,C7,C8A,C8B,C8G,C9,C4BPA,C5,DAK,CAMK2D,CAMK2G,CAPZA1,CAPZA2,PIAS1,LSM14A,ATRN,CASP1,CASP8,CD14,PLA2G4C,SAMHD1,SIN3A,AOC3,CDK1,CD74,CD44,CD59,CH…
GO: Biological Process	GO:0001525	angiogenesis	0.0001075	109	389	AAMP,NRP1,NRP2,ADD1,ANXA3,ANPEP,ANXA2,PLCD3,RHOB,C6,C5,CAV1,CASP8,PRKD2,CLIC4,CDC42,CHI3L1,SLC12A6,COL15A1,COL4A1,COL4A2,WASF2,CTNNB1,CTSH,MAPK14,CSPG4,AIMP1,CYP1B1,MMRN2,ERAP1,TYMP,ROCK2,ECM1,ENPEP,PTK2B,PNPLA6,ERBB2,EPHB3,EPHB4,NAA15,PDCD10,FN1,VAV3,COL18A1,GTF2I,GNA13,GPX1,GPI,HTATIP2,HRG,HMOX1,RBPJ,HSPG2,ITGB2,ITGAV,ITGA5,SMAD5,LEPR,MEIS1,MCAM,MMP19,MMP14,MMP9,MMP2,MYH9,RBM15,MTDH,NCL,RTN4,NF…
GO: Biological Process	GO:0007017	microtubule-based process	0.0001084	126	461	AK7,AP3D1,AP1G1,ARL3,BUB3,ARHGEF2,ZW10,SMC3,SUN2,SMC1A,DST,AP3B1,CDC42BPA,CAV1,OFD1,NEK7,CDK2,CDC42,CDK1,CHD3,CDKN1B,CETN2,CKAP5,NEDD1,CNP,TPPP3,CLTC,HDAC6,CTNNB1,LRPPRC,CRYAB,DAG1,CYLD,DYNC1H1,DYNC1LI2,DYNC1I2,KIF3B,DIAPH1,TTC21B,TUBAL3,ROCK2,NCOR1,ARHGEF10,CROCC,RHOT2,FER,FES,FKBP4,TRPV4,ERBB2,TUBGCP2,HSPH1,CHP1,CEP250,FLNA,KIF3A,TACC3,DYNC1LI1,TUBA1B,TUBB4B,TUBB3,TUBGCP3,HTT,DCTN2,TUBGCP4,EML4…
GO: Biological Process	GO:0000097	sulfur amino acid biosynthetic process	0.0001093	12	20	EIF2B2,EIF2B4,BHMT,EIF2B1,GOT1,APIP,MTHFD1,MTHFR,MTAP,MTR,ADI1,MRI1
GO: Biological Process	GO:0002831	regulation of response to biotic stimulus	0.0001203	35	95	AP1M1,AP1S2,AP2B1,AP1B1,AP2A2,AP2A1,AP1G1,C1QBP,SIN3A,ELMO1,ATP6V1H,AP2M1,DOCK2,TMEM173,HCK,HRG,IFIT1,IRF3,MAVS,MIF,ZC3HAV1,ITCH,PAK2,PCBP2,PRKCA,DDX60,PML,PACS1,PYCARD,RAC1,PVRL2,DDX58,TNFAIP3,PRDX2,TRIM5
GO: Biological Process	GO:0006740	NADPH regeneration	0.0001207	10	15	PGLS,H6PD,G6PD,HIBADH,IDH1,PGD,PGAM1,TKT,TALDO1,GLYR1
GO: Biological Process	GO:0090002	establishment of protein localization to plasma membrane	0.000123	21	47	AKT1,ANK2,ANK3,ARF6,RHOG,PIP5K1A,DLG1,INPP5K,TMED2,GNB2L1,MYL12A,SORBS1,KIF5B,SPTBN4,PDPK1,PACS1,PIK3R1,PID1,SPTBN1,EHD3,PACS2
GO: Biological Process	GO:0006766	vitamin metabolic process	0.0001232	38	106	ACP5,VNN1,ALDH1A2,NFS1,RGN,BTD,PDXK,AASDHPPT,PPCDC,CBR1,AKR1C3,THTPA,CYB5A,CYP11A1,CYB5R3,FASN,COASY,FLAD1,GCLC,AKR1A1,GPHN,GC,TPK1,MTHFD1,MTHFR,MCCC1,NFKB1,ENPP1,PLTP,RBP1,LGMN,SLC2A1,SHMT1,TCN2,PNPO,VKORC1L1,QPRT,NAPRT1
GO: Biological Process	GO:0022603	regulation of anatomical structure morphogenesis	0.0001253	171	657	NRP1,ADD1,AGT,ALDOA,ALOX15,ANXA3,ANXA7,APOE,LIMD1,ZMYM3,ARHGAP4,ARHGDIA,RHOB,ARHGEF1,BAX,BCL2,STK24,FZD1,C21orf2,FMNL1,C1QBP,C6,C5,CALR,CAPZB,PRKD2,NUMB,CDH1,SEPT7,CD44,CHI3L1,CHN1,COL1A1,MED12,ARPC2,ACTR3,COL4A2,DNM1L,CTNNB1,CTSH,TRPV2,LRRK2,DAB2,DIAPH1,MYH14,MMRN2,ERAP1,ROCK2,ECM1,EPB41,EPB41L2,PTK2B,FERMT2,FGR,FES,ERBB2,EPHB3,F2,CORO1A,FN1,TRIOBP,FGD3,WDR36,CDC42EP2,VAT1,STK25,GNB2L1,GOLGA2,CF…
GO: Biological Process	GO:0007568	aging	0.0001315	69	226	ADA,ADRBK1,AGT,AKT1,ALDOC,APOE,APEX1,ATM,ATP6AP1,BAK1,BCL2,CANX,CALR,CASP7,CAT,PNPT1,CDK6,SIN3A,CDK1,CTSC,CTNNA1,MAPK14,CRYAB,DCN,LRRK2,DLD,CLN8,NR5A1,MSH6,MGEA5,HTT,HSD17B10,GSN,GSS,GRB2,PDCD4,IDE,ICAM1,ILK,LRP1,LMNA,FADS1,MPO,MSH2,MSRA,MIF,MME,OPA1,PEBP1,NCAM1,NCF2,RTN4,MAP2K1,PRKCA,PRELP,SERPINF1,PML,RELA,RNPEP,PTGS1,SRR,XRN1,SOD1,SHC1,MARCH5,TOP2A,TFRC,SERPINA7,MORC3
GO: Biological Process	GO:0001568	blood vessel development	0.0001329	143	536	AAMP,NRP1,NRP2,FBXW8,ACTA2,ADD1,AGT,AKT1,SGPL1,ALDH1A2,ANXA3,ANPEP,ANXA2,APOB,APOE,PLCD3,RHOB,RECK,C6,C5,CAV1,CASP8,PRKD2,CLIC4,CDC42,CHI3L1,CUL7,COL1A1,CRKL,SLC12A6,COL15A1,COL4A1,COL3A1,COL4A2,WASF2,CTNNB1,CTSH,MAPK14,CSPG4,AIMP1,CYP1B1,MMRN2,QKI,ERAP1,TYMP,ROCK2,ECM1,ENPEP,PTK2B,PNPLA6,ERBB2,EPHB3,EPHB4,NAA15,PDCD10,FN1,VAV3,COL18A1,YAP1,WARS2,GTF2I,GNA13,GPX1,NSDHL,GPI,RAPGEF1,HTATIP2,HRG,HMO…
GO: Biological Process	GO:0006839	mitochondrial transport	0.0001363	43	125	KIAA1279,TIMM13,AIP,SLC25A6,ATP5C1,ATP5A1,ATP5J,SAMM50,BID,BAK1,BAX,BCL2,SLC25A20,PNPT1,SLC25A12,TOMM70A,CNP,MFN2,CPT1A,CPT2,PPIF,SLC25A13,PMPCB,TOMM40,TIMM44,SH3GLB1,TRNT1,FIS1,GFER,ATP5L,HTT,MTX2,HSPA4,KIF5B,MIPEP,TOMM22,PRKAB2,MCU,SLC25A1,SLC1A3,YWHAZ,TST,PMPCA
GO: Biological Process	GO:0010950	positive regulation of endopeptidase activity	0.0001363	43	125	RIPK1,FAM162A,TRADD,APAF1,AIFM1,BAK1,BAX,FOXL2,C6,C9,CASP1,CASP7,CASP8,CDKN1B,PDCD6,PSMD14,PSME3,DDX3X,PPM1F,ADRM1,GNB2L1,RPS27L,FIS1,HIP1,HTRA2,IFI16,JAK2,SMAD3,MEN1,MAP3K5,MAPK9,NLRP2,PML,PYCARD,PSME1,PSME2,S100A9,S100A8,MTCH1,RPS3,UACA,IFT57,VCP
GO: Biological Process	GO:0051276	chromosome organization	0.0001434	192	751	FBXO4,ACTL6A,NOC2L,PARP1,ASH2L,BAZ1B,RPS6KA4,ARRB1,BUB3,ZW10,ATM,SMC3,TRRAP,ARID1A,NIPBL,SMC1A,HAT1,CHD5,SMARCA5,HIRIP3,POT1,CDC23,CDK2,RUVBL1,SIN3A,CDK1,CHD4,CHD3,MLL4,CDK9,RNF40,BRCC3,HDAC6,CREBBP,RAD50,HUWE1,CTNNB1,CTBP1,UBR5,H2AFV,MTA2,DAPK3,DIS3L2,TRIP12,TBL1XR1,GTF3C4,DNMT1,DNMT3A,DKC1,CENPV,RSF1,NUDT16,CHD1L,H2AFY,BRE,KDM3B,NCOR1,CTR9,CDC73,WDR61,FEN1,WDR82,MORF4L1,BRD8,ERCC4,RUVBL2,SRCAP,…
GO: Biological Process	GO:0002757	immune response-activating signal transduction	0.0001464	76	255	RIPK1,ADA,ARF6,ARRB2,BCL2,BTK,C1QBP,CACNB3,LSM14A,CASP8,PRKD2,CD14,CDK1,SPG21,MAPK14,CSK,MAPKAPK2,CYLD,LPXN,DUSP3,MALT1,TAB1,VAV3,HCK,NCKAP1L,HLA-DRA,HLA-DPA1,IGHM,IRF3,LYN,MAVS,LCP2,ZC3HAV1,MNDA,ITCH,PAWR,PAK1,PAK2,NCK1,NFKB2,NFKB1,MAP2K1,MAP2K2,MAP2K3,MAPK9,MAP2K6,MAPK3,MAPK1,PRKCB,DDX60,PDPK1,ENAH,PLCG1,PLCG2,PIK3CA,PIK3R1,RELA,TBK1,PHPT1,PTPN6,PTPRC,MAP2K4,DDX58,RPS6KA1,RPS6KA2,RPS6KA3,RPS27A…
GO: Biological Process	GO:0005977	glycogen metabolic process	0.0001473	28	71	ACADM,AGL,AKT1,AKT2,CALM3,INPP5K,MTOR,GAA,GFPT1,GBE1,GYS1,GYG1,PTGES3,SORBS1,GNMT,IL6ST,PPP1CC,PPP1CA,PPP1R2,PGM5,PGM1,ENPP1,PHKA1,PYGB,PYGL,PYGM,PGM2,UGP2
GO: Biological Process	GO:0042542	response to hydrogen peroxide	0.0001531	35	96	ADA,ADRBK1,ANXA1,APOA4,APEX1,RHOB,PRDX5,BAK1,BCL2,CAT,CDK1,COL1A1,HDAC6,CRYAB,CYP11A1,PRDX6,PTK2B,PRDX3,TXNIP,GPX1,HMOX1,PARK7,MPO,MAP3K5,MMP2,PRDX1,PRKAA1,PPP2CB,PLCG1,PLD2,RELA,SOD1,SHC1,PRDX2,TXNRD1
GO: Biological Process	GO:0071825	protein-lipid complex subunit organization	0.0001562	16	32	ABCA1,AGT,APOB,APOA4,APOA2,APOE,APOC3,APOC2,DGAT1,CETP,ACSL3,FECH,MPO,APOM,SOAT1,NR1H2
GO: Biological Process	GO:0071827	plasma lipoprotein particle organization	0.0001562	16	32	ABCA1,AGT,APOB,APOA4,APOA2,APOE,APOC3,APOC2,DGAT1,CETP,ACSL3,FECH,MPO,APOM,SOAT1,NR1H2
GO: Biological Process	GO:0008203	cholesterol metabolic process	0.000159	42	122	ABCA1,ACADL,ACADVL,APOB,APOA4,APOA2,APOE,APOC3,CAT,SNX17,CETP,CYP11A1,CYP27A1,CYP7B1,CYB5R3,GGPS1,FECH,FDXR,FDPS,EPHX2,CLN8,G6PD,ACAA2,HDLBP,NSDHL,IDI1,LRP1,LSS,LIPE,LEPR,LBR,NPC1,POR,PON1,PRKAA1,APOBR,SORL1,SOD1,SOAT1,APOL2,VLDLR,OSBPL1A
GO: Biological Process	GO:0048585	negative regulation of response to stimulus	0.0001594	214	850	A2M,ABR,NRP1,ACP5,RIPK1,ADA,ADH7,ADRBK1,ADRBK2,AP2B1,AP2A2,AP2A1,AGT,AKT1,ARHGEF7,AHSG,AIF1,AMBP,ANXA1,APOE,LIMD1,ARRB1,ARRB2,HGS,ARHGEF1,SERPINC1,BCL2,FZD1,C1QBP,SERPING1,C5,CALR,CASK,CBL,CUL3,CAV1,CASP8,NUMB,CDK6,CDC42,CD74,CD44,CD59,KANK2,ARHGEF11,CCR1,G3BP2,USP15,MED12,AP2M1,MFN2,SUFU,CLTA,CLTC,COL3A1,TAOK3,CTNND1,CTNNA2,G3BP1,UCHL5,UBR5,CSK,TNFAIP8L2,DDX3X,DAB2,DAG1,TRIP12,CYLD,SLC9A3R1,LPXN…
GO: Biological Process	GO:0030518	intracellular steroid hormone receptor signaling pathway	0.0001651	39	111	ARRB2,ARID1A,CALR,PIAS1,KANK2,THRAP3,MED12,HDAC6,CTNNB1,DDX54,UBR5,DDX5,DAB2,CYP7B1,MED17,FKBP4,RBM14,PTGES3,CARM1,DDX17,DNAJA1,JAK2,PARK7,STRN3,PAK1,NEDD4,MED1,PHB,PGR,RAN,SMARCA4,SAFB,TGFB1I1,TAF7,SRC,YWHAH,UBE2I,UBE3A,MLL2
GO: Biological Process	GO:0008543	fibroblast growth factor receptor signaling pathway	0.0001672	48	145	ADCY3,ADRBK1,AKT1,FIBP,CALM3,CBL,PRKD2,CDK1,CDKN1B,RAB14,CTNNB1,MTOR,GAB1,GPC1,GRB2,ITPR2,ITPR1,NPTN,KRAS,FAM20C,MAP2K1,MAP2K2,MAPK3,MAPK1,PRKAR1A,PRKACG,PRKCA,PRKAR2A,PRKAR2B,PRKACB,PRKACA,PPP2CA,PPP2R1A,PPP2CB,KIF16B,PDPK1,PLCG1,PIK3CA,PIK3R1,THEM4,PTPN11,SHC1,RPS27A,THBS1,SRC,YWHAB,TSC2,AKT1S1
GO: Biological Process	GO:0048514	blood vessel morphogenesis	0.0001685	128	474	AAMP,NRP1,NRP2,ADD1,SGPL1,ANXA3,ANPEP,ANXA2,APOB,APOE,PLCD3,RHOB,C6,C5,CAV1,CASP8,PRKD2,CLIC4,CDC42,CHI3L1,CUL7,SLC12A6,COL15A1,COL4A1,COL4A2,WASF2,CTNNB1,CTSH,MAPK14,CSPG4,AIMP1,CYP1B1,MMRN2,QKI,ERAP1,TYMP,ROCK2,ECM1,ENPEP,PTK2B,PNPLA6,ERBB2,EPHB3,EPHB4,NAA15,PDCD10,FN1,VAV3,COL18A1,YAP1,WARS2,GTF2I,GNA13,GPX1,GPI,HTATIP2,HRG,HMOX1,RBPJ,HSPG2,ITGB2,ITGAV,ITGA5,SMAD5,LRP1,LEPR,CCM2,MEIS1,MCAM,MMP…
GO: Biological Process	GO:0072659	protein localization to plasma membrane	0.0001701	29	75	AKT1,AKT2,ANK2,ANK3,ARF6,RHOG,PIP5K1A,CDH1,C2CD5,FLOT1,DLG1,INPP5K,TMED2,GNB2L1,MYL12A,SORBS1,KIF5B,SPTBN4,MYO5A,PDPK1,DENND4C,PACS1,PIK3R1,SCP2,PID1,SPTBN1,FCHO2,EHD3,PACS2
GO: Biological Process	GO:0009226	nucleotide-sugar biosynthetic process	0.0001702	11	18	GFPT1,MPI,GMPPB,GMPPA,GNPNAT1,PGM3,PMM2,CMAS,UGP2,UGDH,TSTA3
GO: Biological Process	GO:0006998	nuclear envelope organization	0.0001702	11	18	SUN2,BAX,TOR1AIP1,TOR1A,NUP155,EMD,ZMPSTE24,TOR1B,LMNA,CDAN1,SUN1
GO: Biological Process	GO:0048268	clathrin coat assembly	0.000176	9	13	AP2B1,AP1B1,PICALM,DAB2,CLINT1,EPS15,HIP1,PIK3C2A,FCHO2
GO: Biological Process	GO:0043555	regulation of translation in response to stress	0.000176	9	13	EIF2B5,EIF2B4,EIF2B3,EIF2S1,EIF2B1,FECH,PML,RPS6KA1,RPS6KA3
GO: Biological Process	GO:0032968	positive regulation of transcription elongation from RNA polymerase II promoter	0.000176	9	13	DAB2,CTR9,CDC73,WDR61,MAP2K1,PAF1,TCEB1,SUPT5H,BRD4
GO: Biological Process	GO:0051085	chaperone mediated protein folding requiring cofactor	0.000176	9	13	CD74,TOR1A,HSPH1,HSPA8,TOR1B,TOR2A,DNAJB1,ERO1L,TOR3A
GO: Biological Process	GO:2000147	positive regulation of cell motility	0.0001876	78	265	AAMP,NRP1,NRP2,ACP5,ADAM10,AGT,AKT1,AIF1,AKT2,SPAG9,ANXA3,ARHGAP5,SUN2,BCL2,C1QBP,CAMK2D,IKBKAP,CALR,PRKD2,AOC3,CD74,CCR1,COL1A1,HDAC6,CTSH,MAPK14,DAB2,DIAPH1,PPM1F,EGFR,PTK2B,FGR,FER,CORO1A,MIA3,GNB2L1,COL18A1,NCKAP1L,IL6ST,ICAM1,JAK2,EPB41L5,ITGAV,ITGA5,ILK,LYN,SMAD3,LAMB1,MYO1F,MIF,MMP14,MMP9,MYLK,MAP2K1,MAP2K2,PRKD1,MAPK1,PRKCA,PDGFRB,PDGFRA,PLCG1,PLD1,PLD2,PIK3R1,RARRES2,PYCARD,PHPT1,PTK2,PT…
GO: Biological Process	GO:0071229	cellular response to acid	0.0001938	20	45	ANXA2,LAMTOR3,CDH1,COL1A1,COL5A2,COL6A1,COL4A6,COL4A1,COL3A1,DNMT1,DNMT3A,MMP2,OXCT1,UBR1,RRAGC,PDGFRA,LAMTOR2,S100A10,LAMTOR1,HIST1H2BA
GO: Biological Process	GO:0033673	negative regulation of kinase activity	0.0001947	55	173	ADAR,AKT1,APOE,CAV1,CDKN1B,TAOK3,CSK,INPP5K,DUSP9,DUSP3,PPM1F,PRDX3,CHP1,GNB2L1,GNAQ,GMFB,SNX6,GSTP1,GPS1,PDCD4,KNG1,INPPL1,STK38,ILK,LYN,CHORDC1,WNK1,MEN1,MLLT1,PAK2,DEPTOR,AIDA,NF1,NF2,DNAJC3,PRKAR1A,PRKCA,PPP2CA,PPP2R1A,PDPK1,TRIM27,PYCARD,PRPSAP1,PTPN6,PTPRC,DAB2IP,THY1,TNFAIP3,NR2F2,TAF7,YWHAG,UCHL1,TSC2,UBASH3B,AKT1S1
GO: Biological Process	GO:0044042	glucan metabolic process	0.0001952	28	72	ACADM,AGL,AKT1,AKT2,CALM3,INPP5K,MTOR,GAA,GFPT1,GBE1,GYS1,GYG1,PTGES3,SORBS1,GNMT,IL6ST,PPP1CC,PPP1CA,PPP1R2,PGM5,PGM1,ENPP1,PHKA1,PYGB,PYGL,PYGM,PGM2,UGP2
GO: Biological Process	GO:0006073	cellular glucan metabolic process	0.0001952	28	72	ACADM,AGL,AKT1,AKT2,CALM3,INPP5K,MTOR,GAA,GFPT1,GBE1,GYS1,GYG1,PTGES3,SORBS1,GNMT,IL6ST,PPP1CC,PPP1CA,PPP1R2,PGM5,PGM1,ENPP1,PHKA1,PYGB,PYGL,PYGM,PGM2,UGP2
GO: Biological Process	GO:0009636	response to toxic substance	0.0001992	57	181	ALPL,ASNA1,BDH1,BAK1,BAX,BCL2,BLMH,BPHL,CASP1,CASP8,SIN3A,CDH1,AOC3,CDK1,CDKN1B,CES1,CNP,CPOX,HDAC6,ACTR3,ABCB6,CYP11A1,CYP17A1,CYP1B1,NQO1,INPP5K,ENDOG,FECH,EPHX1,EPHX2,GPX1,GPD1,HMBS,JAK2,JAK1,ITPR2,LYN,MPST,MAP1B,MAOB,MGMT,MLH1,PEBP1,PON1,MAPK3,MAPK1,PRKCA,PPP2CB,PDE3A,SSH1,SLC1A3,SHC1,MARC2,UROD,HSP90B1,WAPAL,SCFD1
GO: Biological Process	GO:0072594	establishment of protein localization to organelle	0.0002051	66	217	TIMM13,AIP,SLC25A6,SAMM50,BID,BAX,AP3B1,SCARB2,SPCS3,ZFYVE16,TOMM70A,MFN2,DDOST,RAB8B,PMPCB,TOMM40,TIMM44,SH3GLB1,TRNT1,FIS1,GFER,MTX2,SRPRB,HSPA4,AP3M1,MIPEP,TOMM22,SEC61A1,NEDD4,RPL10A,LRWD1,PEX14,PACS1,RPL10,RPL19,SEC11C,PEX5,RAB6A,RPS5,RPS9,RPS12,RPS10,RPLP1,RPN2,RPN1,RPS4X,RPS3A,RPS3,RPLP0,RPL22,RPS21,RPS27A,RPS15,RPS15A,RPS19,RPS16,SSR3,SSR4,SRP14,SRP54,SRP72,SRP68,SRPR,YWHAZ,WDR24,PMPCA
GO: Biological Process	GO:0044264	cellular polysaccharide metabolic process	0.0002061	33	90	ACADM,AGL,AKT1,AKT2,CALM3,COLGALT1,INPP5K,MTOR,GAA,CERCAM,GFPT1,GBE1,GYS1,GYG1,PTGES3,SORBS1,GNMT,IL6ST,MAT2B,PPP1CC,PPP1CA,CSGALNACT2,PPP1R2,PGM5,PGM1,ENPP1,PHKA1,CMAS,PYGB,PYGL,PYGM,PGM2,UGP2
GO: Biological Process	GO:0007029	endoplasmic reticulum organization	0.0002082	12	21	ATL3,SEC16A,GET4,DOPEY2,COL4A3BP,ATL1,RTN3,HTT,RTN4,ATL2,PEX5,BAG6
GO: Biological Process	GO:0043487	regulation of RNA stability	0.0002099	19	42	SERBP1,APEX1,RBM10,CIRBP,THRAP3,MAPK14,DHX9,MAPKAPK2,ELAVL1,HNRNPA0,SYNCRIP,PAIP1,HNRNPU,HNRNPD,PABPC1,YBX1,PCID2,CARHSP1,TARDBP
GO: Biological Process	GO:0007243	intracellular protein kinase cascade	0.0002113	235	948	RIPK1,TRADD,AGT,AKT1,SQSTM1,AKT2,AMBP,SPAG9,DOK2,AIP,APOE,ARAF,RPS6KA4,ARRB1,ARRB2,HGS,BTK,C1QBP,C5,CAMK2D,IKBKAP,PIAS1,CAV1,CASP1,CASP8,LAMTOR3,PRKD2,AKR1C3,CD14,CDC42,CDK1,CD81,CD74,CD44,CHI3L1,PTPLAD1,CCR1,G3BP2,OXSR1,CRKL,CRK,TAOK3,SORBS3,CTNNB1,ATP6AP2,CRLF3,CTSH,MAPK14,CRYAB,CSPG4,CSK,LRRK2,DDX3X,DAPK3,MAPKAPK2,DAB2,DAG1,CYLD,SLC9A3R1,MAP4K4,ARHGEF6,INPP5K,ECM1,DUSP9,DUSP3,AKAP12,NCOR1,CTR9…
GO: Biological Process	GO:0006469	negative regulation of protein kinase activity	0.0002199	52	162	ADAR,AKT1,APOE,CAV1,CDKN1B,TAOK3,INPP5K,DUSP9,DUSP3,PPM1F,CHP1,GNB2L1,GNAQ,GMFB,SNX6,GSTP1,GPS1,PDCD4,KNG1,INPPL1,STK38,ILK,LYN,CHORDC1,WNK1,MEN1,MLLT1,PAK2,DEPTOR,AIDA,NF1,NF2,DNAJC3,PRKAR1A,PRKCA,PPP2CA,PPP2R1A,PDPK1,TRIM27,PYCARD,PTPN6,PTPRC,DAB2IP,THY1,TNFAIP3,NR2F2,TAF7,YWHAG,UCHL1,TSC2,UBASH3B,AKT1S1
GO: Biological Process	GO:0072527	pyrimidine-containing compound metabolic process	0.0002226	29	76	MBD4,CDA,THTPA,CRMP1,CTPS1,DCTD,TYMP,UPB1,DUT,DPYSL3,DPYSL2,DPYD,ERH,DPYSL4,AK3,TPK1,CTPS2,ALDH6A1,NT5E,NME7,NME2,NME3,PRPS1,MAPK1,RP2,SMUG1,UPP1,UMPS,NT5C
GO: Biological Process	GO:0046320	regulation of fatty acid oxidation	0.0002248	18	39	ACADL,ACADVL,AKT1,AKT2,SLC25A20,ACSL5,CPT1A,CPT2,DBI,CAB39,ACSL1,MTOR,CAB39L,PRKAG1,PRKAA1,PRKAB2,PRKAB1,MLYCD
GO: Biological Process	GO:0019216	regulation of lipid metabolic process	0.0002281	72	242	SERPINA3,ACADL,ACADVL,AGT,AKT1,AKT2,ANXA1,APOB,APOA4,APOA2,APOE,APOC3,APOC2,ATP1A1,SLC25A20,CAV1,AKR1C3,CDC42,CD81,ACSL5,CPT1A,CPT2,DBI,CYP17A1,DLD,CAB39,PTK2B,ACSL3,ACSL1,ACSL4,FDPS,FGR,EPHX2,MTOR,NR5A1,LPCAT1,VAV3,ABHD5,STUB1,SORBS1,SLC27A1,LYN,CAB39L,NFKB1,SMEK2,POR,MAPK9,PRKAG1,PRKAA1,PRKAB2,PRKAB1,PDHB,PDK3,PDK2,PDGFRB,PDGFRA,PIK3R1,PTK2,PSAP,RAC1,SOD1,PDP1,SCP2,LAMTOR1,SRC,PDPR,STAT5A,SF1,N…
GO: Biological Process	GO:0045017	glycerolipid biosynthetic process	0.0002319	70	234	DPM1,ACACA,MTMR1,MTMR2,APOA2,ATM,MTMR6,PIP5K1A,GNPAT,DGAT1,PLA2G4C,CD81,FIG4,PIGT,LPGAT1,ACSL5,PIGK,ALG12,ALG9,PCYT1B,INPP5K,FASN,ACSL3,ACSL1,ACSL4,FABP5,PLBD1,LPCAT1,ABHD5,SH3GLB1,CDIPT,HADHB,HADHA,GPD1,AGPAT1,SLC27A1,INPPL1,MGLL,INPP4A,IMPA1,MTM1,OCRL,AGPAT3,SLC44A2,PCYT1A,VAC14,PLD1,PLCG2,PLD2,PIK3C2A,PIK3CA,PIK3C3,PIK3R1,PI4KA,PIP4K2A,MTMR14,PCYT2,GPCPD1,SLC25A1,PLD3,PIGN,PITPNB,PIGS,SACM1L,N…
GO: Biological Process	GO:0006281	DNA repair	0.0002346	112	409	FBXO6,ACTL6A,PARP1,MBD4,BAZ1B,APEX1,ATM,SMC3,USP10,ATRX,SMC1A,SMARCA5,CUL4B,CUL4A,CDK2,RUVBL1,CDK1,CDK9,CETN2,BRCC3,PARP3,PARP2,RAD50,HUWE1,TAOK3,TRIM28,UCHL5,UBR5,PSMD14,FTO,DDB1,DDX1,TRIP12,NEIL2,NUDT16,CHD1L,BRE,EGFR,FEN1,ASCC3,MORF4L1,ERCC4,RUVBL2,POLG2,POLI,SUPT16H,XRCC6,ACTR5,RBM14,RPS27L,STUB1,MSH6,H2AFX,HMGB2,PRPF19,PNKP,TAOK1,MRE11A,MSH2,MSH3,INTS3,BCCIP,MEN1,MGMT,MNAT1,MLH1,SMARCAD1,WRN…
GO: Biological Process	GO:0030433	ER-associated protein catabolic process	0.0002376	17	36	FBXO6,DERL1,STT3B,OS9,MAN1B1,ERLIN2,DERL2,ERLIN1,ERLEC1,HSPA5,NPLOC4,DNAJC10,WFS1,VCP,HSP90B1,KIAA0368,SYVN1
GO: Biological Process	GO:0009215	purine deoxyribonucleoside triphosphate metabolic process	0.0002482	8	11	ADA,ADK,AK2,DGUOK,NUDT16,GUK1,MGEA5,AK3
GO: Biological Process	GO:0006107	oxaloacetate metabolic process	0.0002482	8	11	CS,GOT2,GOT1,MDH1,MDH2,PCK2,PC,STAT5A
GO: Biological Process	GO:0033540	fatty acid beta-oxidation using acyl-CoA oxidase	0.0002482	8	11	ACAA1,ACOX1,ABCD1,ACOX3,CRAT,HSD17B4,AMACR,SCP2
GO: Biological Process	GO:0048524	positive regulation of viral reproduction	0.00025	30	80	ADAR,NELFB,NELFCD,CDK9,VAPB,RSF1,INPP5K,SUPT16H,GTF2F2,IFIT1,MNAT1,NCBP1,POLR2C,POLR2E,POLR2G,POLR2H,POLR2A,POLR2B,PFN1,RAD23A,SMARCB1,SMARCA4,TOP2A,TCEB1,SUPT5H,SSRP1,SRPK2,NELFA,TARDBP,NELFE
GO: Biological Process	GO:0032508	DNA duplex unwinding	0.0002504	15	30	ATRX,POT1,RUVBL1,RAD50,DDX1,ASCC3,RUVBL2,MRE11A,MCM4,MCM6,MCM2,MCM7,NBN,RECQL,PURA
GO: Biological Process	GO:0048278	vesicle docking	0.0002504	15	30	VPS33B,YKT6,EXOC5,VPS45,RAB8A,NCAM1,PLEK,SCFD2,RALB,EXOC6,STXBP2,STXBP1,STXBP3,SCFD1,EXOC6B
GO: Biological Process	GO:0072522	purine-containing compound biosynthetic process	0.0002528	75	255	ABCA1,ACACA,ADA,ADCY3,ADK,ADSL,ADSS,ADSSL1,AK2,AK1,ALDOA,GMPS,AMPD3,PAPSS2,PAPSS1,AMPD2,APOE,APRT,ATP1A3,ATP1A1,ATP1A2,ATIC,ATP5C1,ATP5A1,ATP2B4,ATP2A3,ATP2A2,ATP2B1,ATP1B1,ATP5J,PPCDC,GMPR2,SLC25A13,DGUOK,CECR1,AKAP12,PTK2B,COASY,CAP2,CAP1,GNAS,GNAI2,GNAI3,GMPR,GART,GBAS,GUK1,GUCY1B3,ATP5L,AK3,PAICS,HPRT1,MAT2B,IMPDH2,IMPDH1,MTHFD1,MTAP,MAT2A,NT5E,OAS2,OAS1,NME7,NF1,NME2,NME3,PPAT,PRPS1,PRKCA,PF…
GO: Biological Process	GO:0043065	positive regulation of apoptotic process	0.0002558	130	487	RIPK1,CRADD,FAM162A,TRADD,AGT,AKT1,ARHGEF7,ALDH1A1,NAE1,ALDH1A2,UBE2M,ANXA5,APAF1,ANXA1,APOE,ARRB1,RHOB,ATM,PDCD5,BAG1,BID,BAK1,BAX,RBM10,STK24,FOXL2,NSMAF,C1QBP,C6,C9,C5,PRKRA,CASP1,CASP7,AKR1C3,CDC42,CD44,BCLAF1,CDKN1B,CLU,HDAC6,CTNNB1,DDX3X,DAPK3,CYLD,DNM2,NQO1,ITM2B,DFNA5,ENDOG,DDX20,FAF1,GNB2L1,COL18A1,SH3GLB1,NDUFA13,TXNIP,AGRN,GPX1,PDIA3,HTATIP2,HRG,HIP1,HTRA2,IGF2R,IFIT2,KNG1,KIAA1967,JAK…
GO: Biological Process	GO:0016579	protein deubiquitination	0.0002559	26	66	USP13,USP8,USP10,TRRAP,USP11,USP9X,USP34,BRCC3,USP15,UCHL5,PSMD14,CYLD,STAMBP,WDR48,ITCH,OTUD7B,USP25,USP47,TNFAIP3,TRIM21,USP4,UCHL3,UCHL1,USP22,USP5,USP7
GO: Biological Process	GO:0017148	negative regulation of translation	0.0002563	28	73	EIF2B5,EIF2B4,EIF2B3,AATF,CALR,EIF4A3,CIRBP,DDX3X,DAPK3,ITM2B,EIF2B1,EPRS,FMR1,SYNCRIP,GNB2L1,NDUFA13,MGEA5,IGF2BP3,IGF2BP2,IREB2,EIF3E,CAPRIN1,PRKCA,PML,PURA,TIA1,SRP14,FXR1
GO: Biological Process	GO:0001944	vasculature development	0.0002629	147	561	AAMP,NRP1,NRP2,FBXW8,ACTA2,ADD1,AGT,AKT1,SGPL1,ALDH1A2,ANXA3,ANPEP,ANXA2,APOB,APOE,PLCD3,RHOB,RECK,FZD1,C6,C5,CAV1,CASP8,PRKD2,RIC8A,CLIC4,CDC42,CHI3L1,CUL7,COL1A1,CRKL,SLC12A6,COL15A1,COL4A1,COL3A1,COL4A2,WASF2,CTNNB1,CTSH,MAPK14,CSPG4,AIMP1,CYP1B1,MMRN2,QKI,ERAP1,TYMP,ROCK2,ECM1,ENPEP,PTK2B,PNPLA6,ERBB2,EPHB3,EPHB4,NAA15,PDCD10,FN1,VAV3,COL18A1,YAP1,WARS2,GTF2I,GNA13,GPX1,NSDHL,GPI,RAPGEF1,ANP3…
GO: Biological Process	GO:0009179	purine ribonucleoside diphosphate metabolic process	0.0002635	10	16	AK2,AK1,ATP5C1,ATP5A1,ENTPD1,ENTPD2,NUDT16,NUDT18,GUK1,AK3
GO: Biological Process	GO:0009135	purine nucleoside diphosphate metabolic process	0.0002635	10	16	AK2,AK1,ATP5C1,ATP5A1,ENTPD1,ENTPD2,NUDT16,NUDT18,GUK1,AK3
GO: Biological Process	GO:0002764	immune response-regulating signaling pathway	0.0002724	79	272	RIPK1,ADA,ARF6,ARRB2,BCL2,BTK,C1QBP,CACNB3,LSM14A,CASP8,PRKD2,CD14,CDK1,SPG21,CTSH,MAPK14,CSK,MAPKAPK2,CYLD,LPXN,DUSP3,FGR,FER,MALT1,TAB1,VAV3,HCK,NCKAP1L,HLA-DRA,HLA-DPA1,IGHM,IRF3,LYN,MAVS,LCP2,ZC3HAV1,MNDA,ITCH,PAWR,PAK1,PAK2,NCK1,NFKB2,NFKB1,MAP2K1,MAP2K2,MAP2K3,MAPK9,MAP2K6,MAPK3,MAPK1,PRKCB,DDX60,PDPK1,ENAH,PLCG1,PLCG2,PIK3CA,PIK3R1,RELA,TBK1,PHPT1,PTPN6,PTPRC,MAP2K4,DDX58,RPS6KA1,RPS6KA2,R…
GO: Biological Process	GO:0043068	positive regulation of programmed cell death	0.0002725	131	492	RIPK1,CRADD,FAM162A,TRADD,AGT,AKT1,ARHGEF7,ALDH1A1,NAE1,ALDH1A2,UBE2M,ANXA5,APAF1,ANXA1,APOE,ARRB1,RHOB,ATM,PDCD5,BAG1,BID,BAK1,BAX,RBM10,STK24,FOXL2,NSMAF,C1QBP,C6,C9,C5,PRKRA,CASP1,CASP7,AKR1C3,CDC42,CD44,BCLAF1,CDKN1B,CLU,HDAC6,CTNNB1,LRRK2,DDX3X,DAPK3,CYLD,DNM2,NQO1,ITM2B,DFNA5,ENDOG,DDX20,FAF1,GNB2L1,COL18A1,SH3GLB1,NDUFA13,TXNIP,AGRN,GPX1,PDIA3,HTATIP2,HRG,HIP1,HTRA2,IGF2R,IFIT2,KNG1,KIAA19…
GO: Biological Process	GO:0009991	response to extracellular stimulus	0.0002737	97	347	ACAA1,ACADM,ACADS,ACAT1,KYNU,ADSL,AGL,AKT1,SQSTM1,AIF1,ALB,ALAD,ALPL,ALDH1A2,ALOX5,ARSA,ARSB,SERPINC1,BDH1,TXN2,BCKDHB,BCL2,TECPR1,GNPAT,FZD1,HAT1,WIPI2,CAV1,CAT,AKR1C3,COL1A1,ACSL5,HDAC6,COX4I1,CTSD,ATG9A,DAD1,CYP11A1,CYP17A1,GSDMD,ATG5,DPYD,SLC27A4,ACSL3,ACSL1,ACSL4,MTOR,GNAI2,GGCX,GATM,MYBBP1A,GSN,GSS,ATG7,HSPA5,HMOX1,HMGCL,HMBS,IL6ST,IFI16,ICAM1,ITGA6,LYN,FADS1,LDHA,MPO,MAP1B,MAPT,MGMT,MMP9,N…
GO: Biological Process	GO:0000288	nuclear-transcribed mRNA catabolic process, deadenylation-dependent decay	0.0002788	23	56	CNOT10,EIF4A3,DDX6,EIF4B,EIF4G1,EDC3,PAIP1,LSM3,LSM2,PABPC1,MLH1,CNOT7,CNOT3,CNOT2,DCP1B,DCPS,XRN1,EDC4,TNKS1BP1,DIS3,EXOSC7,CNOT1,EXOSC2
GO: Biological Process	GO:0050776	regulation of immune response	0.0002816	153	588	A2M,ABR,RIPK1,ADA,AMBP,APOA2,ARF6,ARRB2,BCL2,BTK,C1R,C1QC,C2,C1QBP,SERPING1,C6,C7,C8A,C8B,C8G,C9,C4BPA,C5,CACNB3,PIAS1,LSM14A,CASP8,PRKD2,CD14,SAMHD1,SIN3A,CDH1,CDK1,CD81,CD74,CD44,CD59,CCR1,CLU,COL3A1,SPG21,UNC13D,CTSH,MAPK14,CSK,MAPKAPK2,CYLD,LPXN,CFD,ERAP1,ATG5,ECM1,DUSP3,DPP4,FGR,FER,FES,MALT1,IGKV1-5,CDC37,TMEM173,TAB1,VAV3,MASP2,HCK,NCKAP1L,GPX1,HRG,HSP90AB1,HPX,HMOX1,HLA-DRA,HLA-DPA1,IL6ST…
GO: Biological Process	GO:0002218	activation of innate immune response	0.0002877	48	148	RIPK1,ARF6,ARRB2,BTK,C1QBP,LSM14A,CASP8,CD14,SIN3A,CDK1,MAPK14,MAPKAPK2,CYLD,DUSP3,TMEM173,TAB1,HCK,IFI16,IRF3,LYN,MAVS,ZC3HAV1,ITCH,NFKB2,NFKB1,MAP2K1,MAP2K2,MAP2K3,MAPK9,MAP2K6,MAPK3,MAPK1,DDX60,PDPK1,RELA,TBK1,PYCARD,MAP2K4,DDX58,RPS6KA1,RPS6KA2,RPS6KA3,RPS27A,TLR2,TNFAIP3,TRIM5,MAPKAPK3,PGLYRP2
GO: Biological Process	GO:0009968	negative regulation of signal transduction	0.0003017	176	690	RIPK1,ADA,ADH7,ADRBK1,ADRBK2,AP2B1,AP2A2,AP2A1,AGT,AKT1,ARHGEF7,AHSG,AMBP,APOE,LIMD1,ARRB1,ARRB2,HGS,ARHGEF1,BCL2,FZD1,C1QBP,CALR,CBL,CUL3,CAV1,CASP8,NUMB,CDC42,CD74,CD44,KANK2,ARHGEF11,G3BP2,USP15,MED12,AP2M1,MFN2,SUFU,CLTA,CLTC,TAOK3,CTNND1,G3BP1,UCHL5,CSK,DDX3X,DAB2,DAG1,CYLD,SLC9A3R1,LPXN,MMRN2,CYP7B1,INPP5K,ECM1,DUSP9,DUSP3,NCOR1,EGFR,FBN1,FBP1,EPS15,CHP1,STRAP,FAF1,GLG1,GNB2L1,STUB1,EPS15L1…
GO: Biological Process	GO:0005976	polysaccharide metabolic process	0.0003044	35	99	ACADM,AGL,AKT1,AKT2,CALM3,CHIT1,COLGALT1,INPP5K,MTOR,GAA,CERCAM,GFPT1,GBE1,GYS1,GYG1,PTGES3,SORBS1,GNMT,IL6ST,MAT2B,NFKB1,PPP1CC,PPP1CA,CSGALNACT2,PPP1R2,PGM5,PGM1,ENPP1,PHKA1,CMAS,PYGB,PYGL,PYGM,PGM2,UGP2
GO: Biological Process	GO:0006749	glutathione metabolic process	0.0003141	22	53	GSTK1,GGCT,DPEP1,G6PD,GLO1,GCLC,GSTZ1,GSTT1,GSTP1,GSTM3,GSTM1,HAGH,GPX1,GSS,GSTA4,IDH1,MGST2,MGST3,MGST1,CNDP2,SOD1,ALDH5A1
GO: Biological Process	GO:2001233	regulation of apoptotic signaling pathway	0.0003214	30	81	RIPK1,FAM162A,AKT1,BID,BAK1,BAX,BCL2,CAV1,BCLAF1,CLU,DNM1L,DDX3X,DAPK3,CYLD,GNB2L1,SH3GLB1,FIS1,HTT,HTRA2,JAK2,PARK7,SMAD3,OPA1,PAK2,MAPK9,PPP2R1B,PML,PYCARD,SRC,VDAC2
GO: Biological Process	GO:0006007	glucose catabolic process	0.0003214	30	81	ALDOC,ALDOA,PGLS,H6PD,NCOR1,ENO2,FBP1,G6PD,HIBADH,GPI,HK2,HK1,HK3,LDHA,MIF,LDHAL6A,OGDH,ADPGK,PRKAG1,PRKAA1,PGD,PGAM1,PFKM,PFKP,PFKL,PDHB,OGDHL,TKT,TALDO1,GLYR1
GO: Biological Process	GO:0019673	GDP-mannose metabolic process	0.0003295	7	9	DPM1,GUK1,MPI,GMPPB,GMPPA,PMM2,TSTA3
GO: Biological Process	GO:0000338	protein deneddylation	0.0003295	7	9	COPS3,COPS5,COPS6,COPS8,COPS4,COPS7A,GPS1
GO: Biological Process	GO:0010388	cullin deneddylation	0.0003295	7	9	COPS3,COPS5,COPS6,COPS8,COPS4,COPS7A,GPS1
GO: Biological Process	GO:0034110	regulation of homotypic cell-cell adhesion	0.0003305	11	19	ANK3,CD44,GSTP1,LYN,LGALS1,MAP2K1,PRKG1,PRKCA,SERPINE2,SYK,UBASH3B
GO: Biological Process	GO:0033119	negative regulation of RNA splicing	0.0003305	11	19	AKT2,C1QBP,SRSF9,PTBP3,HNRNPA2B1,PTBP2,U2AF2,PTBP1,SFSWAP,SRSF7,SRSF4
GO: Biological Process	GO:0006778	porphyrin-containing compound metabolic process	0.0003323	18	40	SUCLA2,ALAD,AMBP,BLVRB,BLVRA,CPOX,ABCB6,FECH,HEBP1,HPX,HMOX2,HMOX1,HMBS,IREB2,PPOX,SPTB,SPTA1,UROD
GO: Biological Process	GO:0048024	regulation of mRNA splicing, via spliceosome	0.0003323	18	40	C1QBP,SRSF9,EIF4A3,THRAP3,DDX5,RBM25,HNRNPA2B1,PRPF19,U2AF2,MBNL1,PTBP1,SFSWAP,SRSF7,TRA2B,SRSF4,TIA1,SRPK2,JMJD6
GO: Biological Process	GO:0070127	tRNA aminoacylation for mitochondrial protein translation	0.0003323	5	5	TARS2,YARS2,AARS2,EARS2,DARS2
GO: Biological Process	GO:0034498	early endosome to Golgi transport	0.0003323	5	5	LMAN1,SNX8,SNX1,TMED9,SURF4
GO: Biological Process	GO:0051096	positive regulation of helicase activity	0.0003323	5	5	POT1,MSH6,MSH2,MSH3,SSBP1
GO: Biological Process	GO:1900026	positive regulation of substrate adhesion-dependent cell spreading	0.0003323	5	5	C1QBP,CALR,ARPC2,DAB2,TRIOBP
GO: Biological Process	GO:1901184	regulation of ERBB signaling pathway	0.0003388	26	67	AP2B1,AP2A2,AP2A1,AGT,ARHGEF7,HGS,NCK2,CBL,CDC42,AP2M1,CLTA,CLTC,EGFR,FER,EPS15,EPS15L1,SNX6,GRB2,RBPJ,EPN1,PTPRF,DAB2IP,SHC1,RPS27A,AFAP1L2,STAM
GO: Biological Process	GO:0010648	negative regulation of cell communication	0.0003423	186	736	RIPK1,ADA,ADH7,ADRBK1,ADRBK2,AP2B1,AP2A2,AP2A1,AGT,AKT1,ARHGEF7,AHSG,AMBP,APOE,LIMD1,ARRB1,ARRB2,HGS,ARHGEF1,BCL2,FZD1,C1QBP,CALR,CBL,CUL3,CAV1,CASP8,NUMB,CDC42,CD74,CD44,KANK2,ARHGEF11,G3BP2,USP15,MED12,AP2M1,MFN2,SUFU,CLTA,CLTC,TAOK3,CTNND1,CTNNB1,G3BP1,UCHL5,CSK,DDX3X,DAB2,DAG1,CYLD,SLC9A3R1,LPXN,MMRN2,CYP7B1,INPP5K,ECM1,DUSP9,DUSP3,NCOR1,EGFR,FBN1,FBP1,EPS15,CHP1,MTOR,STRAP,FAF1,GLG1,GNB2L1,G…
GO: Biological Process	GO:0040017	positive regulation of locomotion	0.0003495	79	274	AAMP,NRP1,NRP2,ACP5,ADAM10,AGT,AKT1,AIF1,AKT2,SPAG9,ANXA3,ARHGAP5,SUN2,BCL2,C1QBP,C5,CAMK2D,IKBKAP,CALR,PRKD2,AOC3,CD74,CCR1,COL1A1,HDAC6,CTSH,MAPK14,DAB2,DIAPH1,PPM1F,EGFR,PTK2B,FGR,FER,CORO1A,MIA3,GNB2L1,COL18A1,NCKAP1L,IL6ST,ICAM1,JAK2,EPB41L5,ITGAV,ITGA5,ILK,LYN,SMAD3,LAMB1,MYO1F,MIF,MMP14,MMP9,MYLK,MAP2K1,MAP2K2,PRKD1,MAPK1,PRKCA,PDGFRB,PDGFRA,PLCG1,PLD1,PLD2,PIK3R1,RARRES2,PYCARD,PHPT1,PTK2…
GO: Biological Process	GO:0032319	regulation of Rho GTPase activity	0.0003548	34	96	ARHGAP5,ARHGAP4,RHOG,PIP5K1A,PKP4,DOCK4,CHN1,CRK,PTK2B,ERBB2,EPHB3,MTOR,FGD3,CDC42EP2,NCKAP1L,AGRN,ARFGEF1,ARHGAP35,PREX1,MYO9B,PIN1,RAP1GDS1,PYCARD,PTK2,ARAP1,PLXNB2,THY1,RASIP1,SYDE1,DOCK7,SRGAP2,SCRIB,ARHGAP26,TAX1BP3
GO: Biological Process	GO:0032784	regulation of DNA-dependent transcription, elongation	0.0003574	17	37	THOC1,DAB2,CTR9,CDC73,WDR61,SUPT16H,HTATSF1,KIAA1967,MAP2K1,ZNF326,PAF1,TCEB1,SUPT6H,SUPT5H,NELFA,BRD4,NELFE
GO: Biological Process	GO:0032880	regulation of protein localization	0.0003604	111	409	ACTN2,RSL1D1,PARP1,GAPVD1,AKT1,ANK3,ANXA1,APOA2,ARF6,ARHGDIA,RHOG,ASPH,PICALM,BCL2,FZD1,C5,CASP1,CD14,SIN3A,CDH1,CDC42,CDK1,RAB14,NEDD1,G3BP2,SUFU,DNM1L,CTNNB1,UBR5,MAPK14,CSK,NOLC1,DAB2,CYLD,DLG1,INPP5K,ATG5,EMD,EGFR,ACSL3,FGR,NCKAP1,CHP1,MTOR,TMEM173,FLNA,FAF1,RBPMS,TACC3,LYPLA1,GNB2L1,GNAQ,SH3GLB1,HCLS1,SORBS1,CHERP,ARFIP1,HSP90AB1,LYPLAL1,KIF5B,JUP,JAK2,EPB41L5,IRF3,LYN,SMAD3,SMAD4,LRP1,MAVS,…
GO: Biological Process	GO:0043393	regulation of protein binding	0.000362	38	111	NRP1,ADD1,SPAG9,ARRB1,ARRB2,BAK1,BAX,BCL2,CALD1,CAV1,CDC42,DAB2,EPB41,TMEM173,CRBN,CARM1,HSP90AB1,HSPA4,IFIT2,IFIT1,EPB41L5,PARK7,LRPAP1,MEN1,PCBD1,AIDA,MAPK3,PEX14,PACS1,AKTIP,RAN,SMARCD3,GTPBP4,TGFBR3,SPTA1,SRC,KDM1A,ADNP
GO: Biological Process	GO:0042592	homeostatic process	0.0003632	328	1380	FBXO4,SERPINA3,ABCA1,ABCB7,ACACA,ACADL,ACADVL,ACOX1,ACO1,ACP5,ACTN2,ADA,ADD1,AP3D1,PARP1,MTMR2,AGT,AKT1,AHSG,EIF2B2,EIF2B5,EIF2B4,AKT2,ALDOA,ANK2,ANXA7,ANK3,ANPEP,ANXA1,APOB,APOA4,APOA2,APOE,APOC3,APOC2,APEX1,ARRB1,ASPH,ATP1A1,ATP1A2,ATM,AIFM1,ATP6V0D1,RGN,ATP2A2,ATP6V1B1,ATP6V1B2,ATP6V0C,ATP6V0A1,ATP6V1E1,ATP6V1C1,PRDX5,BAK1,BAX,TXN2,BCL2,GNPAT,CA2,C7,C5,CAMK2D,CALM3,CALR,CACNB3,ATRN,GIGYF2,CAV1…
GO: Biological Process	GO:0043687	post-translational protein modification	0.0003731	60	197	DPM1,PROZ,ARSA,ARSB,ARSD,CANX,CALR,SUMF2,MLEC,STT3B,PIGT,SEC24D,PIGK,ALG12,ALG3,LCMT1,DDOST,DAD1,ALG9,ATG5,SEC24C,MAN1A2,SEC24A,F2,F9,MAN1B1,FUT8,SEC23A,SAR1B,SEC24B,GALNT2,GFPT1,GGCX,PDIA3,STT3A,LMAN1,MAN1A1,MAN2A1,MGAT1,MPI,UGGT1,ALG5,GMPPB,GMPPA,GNPNAT1,PROC,PRKCSH,PGM3,PMM2,MCFD2,SUMF1,SEC13,PIGN,RPN2,RPN1,PIGS,ALG2,SEC31A,MOGS,GANAB
GO: Biological Process	GO:0051646	mitochondrion localization	0.0003741	12	22	ALB,MFN2,LRPPRC,LRRK2,RHOT2,MTM1,MAP1B,MAPT,PVRL2,RHOT1,MAP1S,KIF1B
GO: Biological Process	GO:0031347	regulation of defense response	0.0003788	126	474	A2M,ABR,ACP5,RIPK1,ADA,AP1M1,AP1S2,AP2B1,AP1B1,AP2A2,AP2A1,AP1G1,AGT,AHSG,SLC25A6,ANXA1,APOE,ARF6,ARRB2,SERPINC1,BTK,C2,C1QBP,SERPING1,C6,C4BPA,PIAS1,LSM14A,CASP8,CD14,SAMHD1,SIN3A,AOC3,CDK1,CD74,CD59,ELMO1,CCR1,ATP6V1H,AP2M1,MAPK14,TNFAIP8L2,MAPKAPK2,CYLD,ERAP1,DUSP3,DOCK2,FGR,F12,CDC37,TMEM173,TAB1,GSTP1,HCK,GPX1,HSP90AB1,HPX,IL6ST,IFIT1,IFI16,KLKB1,JAK2,JAK1,PARK7,IRF3,MGLL,LYN,SMAD3,MAVS,MYO1…
GO: Biological Process	GO:0034637	cellular carbohydrate biosynthetic process	0.0003854	27	71	ACADM,AGL,AKT1,AKT2,ISYNA1,COLGALT1,INPP5K,MTOR,CERCAM,GOT1,GFPT1,GBE1,GYS1,GYG1,PTGES3,SORBS1,MAT2B,IMPA1,PPP1CA,CSGALNACT2,PGM5,PGM1,ENPP1,CMAS,IMPAD1,PGM2,UGP2
GO: Biological Process	GO:0042159	lipoprotein catabolic process	0.0003876	6	7	APOB,APOE,ATM,LYPLA1,LYPLAL1,PPT1
GO: Biological Process	GO:0048308	organelle inheritance	0.0003876	6	7	VCPIP1,MAP2K1,MAP2K2,MAPK3,MAPK1,VRK1
GO: Biological Process	GO:0048313	Golgi inheritance	0.0003876	6	7	VCPIP1,MAP2K1,MAP2K2,MAPK3,MAPK1,VRK1
GO: Biological Process	GO:0006094	gluconeogenesis	0.0003888	25	64	ACADM,ALDOC,ALDOA,SLC25A11,SLC25A12,SLC25A13,ENO2,FBP1,GOT2,GOT1,GPD2,GPI,GPD1,GNMT,MDH1,MDH2,PCK2,PC,SMEK2,PRKACG,PRKACB,PRKACA,PGAM1,SMEK1,SLC25A1
GO: Biological Process	GO:0031529	ruffle organization	0.0003967	13	25	AIF1,ARF6,PIP5K1A,LIMA1,INPP5K,MTOR,INPPL1,PLEK,RAC1,TPM1,KANK1,CYFIP1,LPIN1
GO: Biological Process	GO:0006904	vesicle docking involved in exocytosis	0.0004023	14	28	VPS33B,YKT6,VPS45,RAB8A,NCAM1,PLEK,SCFD2,RALB,EXOC6,STXBP2,STXBP1,STXBP3,SCFD1,EXOC6B
GO: Biological Process	GO:0006098	pentose-phosphate shunt	0.0004045	9	14	PGLS,H6PD,G6PD,HIBADH,PGD,PGAM1,TKT,TALDO1,GLYR1
GO: Biological Process	GO:0006662	glycerol ether metabolic process	0.0004045	9	14	TXN2,PDIA6,TXNL1,PDIA5,PDIA3,TXNDC5,P4HB,TMX3,DNAJC10
GO: Biological Process	GO:0019321	pentose metabolic process	0.0004045	9	14	PGLS,G6PD,NUDT5,DCXR,DHDH,RBKS,PGD,TKT,TALDO1
GO: Biological Process	GO:0031667	response to nutrient levels	0.000409	89	317	ACAA1,ACADM,ACADS,ACAT1,KYNU,ADSL,AGL,AKT1,SQSTM1,ALB,ALAD,ALPL,ALDH1A2,ALOX5,ARSA,ARSB,SERPINC1,BDH1,TXN2,BCKDHB,BCL2,TECPR1,GNPAT,FZD1,HAT1,WIPI2,CAV1,CAT,AKR1C3,COL1A1,ACSL5,HDAC6,COX4I1,CTSD,ATG9A,DAD1,CYP11A1,CYP17A1,ATG5,DPYD,SLC27A4,ACSL3,ACSL1,ACSL4,MTOR,GNAI2,GGCX,GATM,MYBBP1A,GSN,GSS,ATG7,HSPA5,HMOX1,HMGCL,HMBS,IL6ST,IFI16,ICAM1,FADS1,MPO,MAP1B,MAPT,MGMT,MMP9,NPC1,PAFAH1B2,MED1,POR,PRKA…
GO: Biological Process	GO:0043200	response to amino acid stimulus	0.0004102	30	82	AARS,BCL2,LAMTOR3,CDH1,COL1A1,COL5A2,COL6A1,COL4A6,COL4A1,COL3A1,DNMT1,DNMT3A,MTOR,GSN,GSS,HMBS,ICAM1,LYN,MSH2,MGMT,MMP2,UBR1,RRAGC,PDGFRA,PIK3C3,PIK3R1,RELA,LAMTOR2,SLC1A3,LAMTOR1
GO: Biological Process	GO:0002684	positive regulation of immune system process	0.000411	154	597	A2M,RIPK1,ADAM10,ADA,AP3D1,ADK,VNN1,AKT1,AIF1,ARF6,ARRB2,SART1,BCL2,BTK,NCK2,C1R,C1QC,C2,C1QBP,SERPING1,C6,C7,C8A,C8B,C8G,C9,C4BPA,C5,CALR,CACNB3,AP3B1,LSM14A,CAV1,CASP8,PRKD2,CD14,SIN3A,CDC42,AOC3,CDK1,CD81,CD74,CD44,CD59,CCR1,CLU,SPG21,MAP3K8,UNC13D,MAPK14,CSK,MAPKAPK2,CYLD,LPXN,CFD,DUSP3,DPP4,PTK2B,FGR,FER,FES,MALT1,IGKV1-5,HSPH1,MTOR,CORO1A,TMEM173,MIA3,TAB1,VAV3,MASP2,HCK,NCKAP1L,GRB2,HRG,HP…
GO: Biological Process	GO:0006470	protein dephosphorylation	0.0004224	51	162	ACP1,RNGTT,MTMR2,MTMR6,BCL2,PTPN23,DUSP9,DUSP3,PPM1F,RPRD1B,IGBP1,NCEH1,MTM1,PPP1R12A,SMEK2,PPP1CC,PPM1G,PPP1CA,PPM1A,LHPP,PPP5C,PPP6C,PPP2R3A,PPP2R4,PPP3CA,PPP3CB,PPP2CA,PPP2R1A,PPP2CB,SMEK1,PHPT1,PTPN1,PTPN11,PTPN9,PTPN12,PTPN6,PTPRD,PTPRC,PTPRE,PTPRA,PTPRF,PTPRG,PTPRS,SSH1,SBF1,PDP1,SSH3,RPRD1A,YWHAB,UBASH3B,FBXW11
GO: Biological Process	GO:0051492	regulation of stress fiber assembly	0.0004369	19	44	ARHGAP6,KANK2,SORBS3,INPP5K,ROCK2,ARHGEF10,PPM1F,MTOR,SYNPO,SMAD3,PAK1,KANK3,NF2,PFN1,SERPINF2,FHOD1,ROCK1,ARAP1,TPM1
GO: Biological Process	GO:0043484	regulation of RNA splicing	0.0004445	26	68	AKT2,C1QBP,SRSF9,EIF4A3,THRAP3,PTBP3,DDX5,RBM25,HNRNPH1,HNRNPF,HNRNPA2B1,PRPF19,PTBP2,U2AF2,MBNL1,PTBP1,SNRNP70,SON,SFSWAP,SRSF7,TRA2B,SRSF4,TIA1,SRPK2,HNRPLL,JMJD6
GO: Biological Process	GO:0006879	cellular iron ion homeostasis	0.0004445	26	68	ABCB7,ACO1,ATP6V0D1,ATP6V1B1,ATP6V1B2,ATP6V0C,ATP6V0A1,ATP6V1E1,ATP6V1C1,ATP6V1H,CP,ABCB6,ATP6V1D,ABCG2,TCIRG1,HPX,HMOX2,HMOX1,IREB2,LTF,NUBP1,TTC7A,SOD1,TF,TFRC,SRI
GO: Biological Process	GO:0006260	DNA replication	0.0004645	83	293	MCM3AP,NAE1,SMC3,SMC1A,CALR,POT1,CDK2,SIN3A,CDC42,CDK1,CDK9,RAD50,DKC1,TYMP,DUT,EGFR,FEN1,CTC1,POLG2,POLI,SUPT16H,MCMBP,RBM14,STAG2,RNASEH2A,DNAJA1,PNKP,INPPL1,TMX1,DNAJC2,MRE11A,MCM4,MCM3,MCM6,MCM5,MCM2,MCM7,WRNIP1,ORC4,ORC2,PCNA,NASP,NBN,NFIC,NFIB,NFIA,NF2,NFIX,MED1,POLD1,LRWD1,PPP2CA,PPP2R1A,PHB,PDGFRA,PML,UPF1,RFC2,RECQL,RFC5,RFC4,RBBP7,RAC1,PURA,MCM9,TERF2IP,SET,MAP2K4,SHC1,ORC3,GTPBP4,RRM1,…
GO: Biological Process	GO:0030335	positive regulation of cell migration	0.0004781	75	260	AAMP,NRP1,NRP2,ACP5,ADAM10,AGT,AKT1,AIF1,AKT2,SPAG9,ANXA3,ARHGAP5,SUN2,BCL2,C1QBP,CAMK2D,IKBKAP,CALR,PRKD2,AOC3,CD74,CCR1,COL1A1,HDAC6,CTSH,MAPK14,DAB2,DIAPH1,PPM1F,EGFR,PTK2B,FGR,FER,CORO1A,MIA3,GNB2L1,COL18A1,NCKAP1L,IL6ST,ICAM1,JAK2,EPB41L5,ITGAV,ITGA5,ILK,LYN,SMAD3,LAMB1,MYO1F,MIF,MMP14,MMP9,MYLK,MAP2K1,PRKD1,MAPK1,PRKCA,PDGFRB,PDGFRA,PLCG1,PLD1,PLD2,PIK3R1,RARRES2,PYCARD,PTK2,PTPRC,TGFBR2,TH…
GO: Biological Process	GO:0006639	acylglycerol metabolic process	0.0004788	40	120	ACACA,APOB,APOA4,APOA2,APOE,APOC3,APOC2,CAV1,CAT,DGAT1,CETP,ACSL5,CPT1A,DBI,FASN,ACSL3,ACSL1,ACSL4,LPCAT1,ABHD5,GPX1,GPD1,AGPAT1,IL6ST,MGLL,LIPE,AGPAT3,PPP1CC,PPP1CA,PRKACG,PRKACB,PRKACA,APOBR,PTPN11,SLC25A1,TNXB,NR1H2,ACSL6,GPD1L,LPIN1
GO: Biological Process	GO:0023057	negative regulation of signaling	0.0004877	184	732	RIPK1,ADA,ADH7,ADRBK1,ADRBK2,AP2B1,AP2A2,AP2A1,AGT,AKT1,ARHGEF7,AHSG,AMBP,APOE,LIMD1,ARRB1,ARRB2,HGS,ARHGEF1,BCL2,FZD1,C1QBP,CALR,CBL,CUL3,CAV1,CASP8,NUMB,CDC42,CD74,CD44,KANK2,ARHGEF11,G3BP2,USP15,MED12,AP2M1,MFN2,SUFU,CLTA,CLTC,TAOK3,CTNND1,CTNNB1,G3BP1,UCHL5,CSK,DDX3X,DAB2,DAG1,CYLD,SLC9A3R1,LPXN,MMRN2,CYP7B1,INPP5K,ECM1,DUSP9,DUSP3,NCOR1,EGFR,FBN1,FBP1,EPS15,CHP1,STRAP,FAF1,GLG1,GNB2L1,GNAI1,…
GO: Biological Process	GO:0070848	response to growth factor stimulus	0.0005116	125	473	NRP1,NRP2,ADCY3,PARP1,ADRBK1,AKT1,ANXA3,APAF1,MYOF,APOE,ARRB2,FIBP,USP9X,FZD1,CALM3,CASK,CBL,CAT,PRKD2,CDK1,CD44,CDK9,CDKN1B,RAB14,COL1A1,USP15,CLU,HDAC6,COL3A1,COL4A2,CTNNB1,UCHL5,MAPK14,MAPKAPK2,DAB2,CYP11A1,TGFBRAP1,MMRN2,INPP5K,NCOR1,NCOR2,EMD,FBN1,FER,MTOR,STRAP,FUT8,GAB1,FMOD,TAB1,GLG1,STUB1,SNX6,F11R,GPC1,GRB2,HRG,HSPA5,HTRA2,ITPR2,ITPR1,EPB41L5,ITGA5,SMAD2,SMAD3,SMAD4,SMAD5,LTBP1,LUM,NPTN…
GO: Biological Process	GO:0009100	glycoprotein metabolic process	0.000517	105	387	DPM1,FBXO6,PARP1,B3GAT3,AATF,ARSB,BGN,BCL2,CANX,CALR,GLCE,MLEC,STT3B,SPOCK2,SEC24D,PARP3,PARP2,CTNNB1,ALG12,ALG3,VCAN,CSPG4,DCN,DDOST,DAD1,ALG9,ITM2B,SEC24C,GPC4,MAN1A2,SEC24A,EXTL3,CHP1,MAN1B1,FUT8,SEC23A,SAR1B,GNAQ,SEC24B,GNA11,GALNT2,GFPT1,MGEA5,AGRN,ARFGEF1,GPC1,PDIA3,HEXA,HEXB,IDS,HSPG2,STT3A,LMAN1,B3GALTL,COG3,MAN1A1,MAN2A1,MANBA,MGAT1,MPI,NPC1,OAS2,UGGT1,PAWR,POGLUT1,ALG5,GMPPB,GMPPA,GNPNA…
GO: Biological Process	GO:0050792	regulation of viral reproduction	0.0005174	37	109	ADAR,BCL2,NELFB,NELFCD,CDK9,VAPB,DDX5,RSF1,INPP5K,SUPT16H,GTF2F2,IFIT1,IFI16,MAVS,MX1,ZC3HAV1,MNAT1,OAS1,NCBP1,POLR2C,POLR2E,POLR2G,POLR2H,POLR2A,POLR2B,PFN1,RAD23A,SMARCB1,SMARCA4,TOP2A,TCEB1,SUPT5H,SSRP1,SRPK2,NELFA,TARDBP,NELFE
GO: Biological Process	GO:0006577	amino-acid betaine metabolic process	0.0005242	10	17	ACADM,ACADL,ALDH9A1,ALDH7A1,BHMT,CPT1A,CRAT,POR,SHMT1,TMLHE
GO: Biological Process	GO:0006085	acetyl-CoA biosynthetic process	0.0005242	10	17	DLD,PDHB,PDK3,PDK2,ACSS2,PDP1,PDPR,ACSS1,MLYCD,PDHX
GO: Biological Process	GO:0072661	protein targeting to plasma membrane	0.0005242	10	17	ANK2,ANK3,PIP5K1A,INPP5K,TMED2,MYL12A,PACS1,SPTBN1,EHD3,PACS2
GO: Biological Process	GO:2001235	positive regulation of apoptotic signaling pathway	0.0005262	17	38	RIPK1,BID,BAX,CAV1,BCLAF1,CLU,DNM1L,DAPK3,CYLD,GNB2L1,FIS1,HTRA2,PAK2,MAPK9,PPP2R1B,PML,PYCARD
GO: Biological Process	GO:0033344	cholesterol efflux	0.0005262	17	38	ABCA1,APOB,APOA4,APOA2,APOE,APOC3,APOC2,CAV1,CETP,LRP1,NPC1,PON1,APOM,SOAT1,STX12,LAMTOR1,NR1H2
GO: Biological Process	GO:0071705	nitrogen compound transport	0.0005268	161	631	ABCA1,ABCB7,IQGAP1,ADA,ADRBK1,AGT,SLC25A4,SLC25A5,SLC25A6,ANXA1,ARRB1,BTK,C5,CAMK2G,SLC25A20,THOC5,KHSRP,UPF2,RAE1,PNPT1,SPCS3,DGAT1,AHCTF1,SRSF9,SLC25A12,CD74,EIF4A3,DHX38,THOC6,CKAP5,NUPL1,G3BP2,MVP,NUP153,RBM8A,CPT1A,NUP35,THOC1,CPT2,COL4A3BP,ABCB6,SLC25A13,NUP37,LRPPRC,CDC40,CRYM,DDX39A,ALYREF,SRSF11,SLC9A3R1,ABCG2,QKI,RAB8B,DPYSL2,NUP155,NUP93,RNPS1,TRPV4,CLN8,NUP50,XPOT,NISCH,FMR1,NUPL2,NUP…
GO: Biological Process	GO:0010810	regulation of cell-substrate adhesion	0.0005393	38	113	ARHGAP6,BCL2,C1QBP,CALR,CASK,CDK6,SPOCK2,COL1A1,ARPC2,DAB2,ROCK2,PPM1F,PTK2B,PLEKHA2,EMILIN1,TRIOBP,HRG,JAK2,EPB41L5,ITGA5,ITGA6,ILK,SMAD3,LGALS1,MMP14,NF1,NF2,NID1,PLG,PIK3R1,RASA1,ROCK1,PTK2,THBS1,TBCD,SRC,UTRN,KANK1
GO: Biological Process	GO:0034599	cellular response to oxidative stress	0.0005393	38	113	ANXA1,APOA4,APEX1,RHOB,PRDX5,CAT,PNPT1,AKR1C3,CDK2,SIN3A,CDK1,HDAC6,TRAP1,CRYGD,LONP1,PRDX6,DPEP1,PRDX3,FER,G6PD,GPX1,FBLN5,HMOX1,PARK7,MPO,MAP3K5,MGST1,MGMT,PRDX1,PRKD1,PRKAA1,PML,AGAP3,SOD3,SOD1,PRDX2,TXNRD1,TPM1
GO: Biological Process	GO:0048285	organelle fission	0.0005471	110	409	ACOX1,CDC16,BUB3,ARHGEF2,ZW10,ATM,SMC3,CLTCL1,BAX,NIPBL,USP9X,SMC1A,CUL3,OFD1,CDC23,AHCTF1,CDK2,RUVBL1,CDC42,CDK11B,SEPT7,SH2B1,CDK1,CDK13,CETN2,CKAP5,NEDD1,CLTC,DNM1L,NUP37,CSNK1A1,DCTN1,NOLC1,DAPK3,DIS3L2,KIF3B,CENPV,ARHGEF10,MAPRE2,SUGT1,TXNL4A,VCPIP1,FLNA,MCMBP,NUP85,DYNC1LI1,TUBB3,PRMT5,FIS1,STAG1,STAG2,NUDC,DCTN2,HTATIP2,ASPM,EML4,KIF2A,TAOK1,BIRC6,TUBB2B,NUMA1,OPA1,ANAPC1,PEBP1,NEK9,PPP1R1…
GO: Biological Process	GO:0051271	negative regulation of cellular component movement	0.0005611	47	148	ABR,ACTN1,ACTN4,ADA,AIF1,APOE,APEX1,ARHGAP4,BCL2,STK24,C5,CLIC4,CDKN1B,CSNK2B,DAG1,SLC9A3R1,MMRN2,DPYSL3,DPEP1,NISCH,MIA3,HRG,HMOX1,RAP2C,ILK,LRP1,ABHD6,NF1,NF2,TMOD3,PIN1,RAP2B,RAP2A,PTK2,RNF20,DAB2IP,GTPBP4,RRAS,TGFBR3,THY1,THBS1,NR2F2,VCL,TPM1,SRGAP2,KANK1,PLCB1
GO: Biological Process	GO:0032480	negative regulation of type I interferon production	0.0005687	16	35	UBE2L6,NLRX1,CYLD,ATG5,IRF3,MAVS,ITCH,PCBP2,PIN1,TBK1,PYCARD,DDX58,RPS27A,TNFAIP3,UBA7,TRIM25
GO: Biological Process	GO:0034446	substrate adhesion-dependent cell spreading	0.0005687	16	35	C1QBP,CALR,C22orf28,ARPC2,DAB2,FER,EPHB3,FN1,TRIOBP,ILK,LAMC1,LAMB1,PARVA,RAC1,SRGAP2,KANK1
GO: Biological Process	GO:0046626	regulation of insulin receptor signaling pathway	0.0005687	16	35	AHSG,INPP5K,GRB14,INPPL1,YBX1,PRKCA,PRKCB,ENPP1,RELA,PTPN1,PTPRE,PTPRF,PID1,SRC,TSC2,KANK1
GO: Biological Process	GO:0006612	protein targeting to membrane	0.0005733	49	156	ANK2,ANK3,PIP5K1A,SPCS3,DDOST,INPP5K,RAB8B,TMED2,CHP1,SEC63,MGEA5,MYL12A,SRPRB,RPL10A,PACS1,ATG3,RPL10,RPL19,SEC11C,PEX5,RPS5,RPS9,RPS12,RPS10,RPLP1,RPN2,RPN1,RPS4X,RPS3A,RPS3,RPLP0,RPL22,RPS21,RPS27A,RPS15,RPS15A,RPS19,RPS16,SPTBN1,SSR3,SSR4,SRP14,SRP54,SRP72,SRP68,SRPR,ATG4C,EHD3,PACS2
GO: Biological Process	GO:0071774	response to fibroblast growth factor stimulus	0.0005777	50	160	ADCY3,ADRBK1,AKT1,FIBP,CALM3,CBL,PRKD2,CDK1,CD44,CDKN1B,RAB14,CTNNB1,CYP11A1,MTOR,GAB1,GPC1,GRB2,ITPR2,ITPR1,NPTN,KRAS,FAM20C,MAP2K1,MAP2K2,MAPK3,MAPK1,PRKAR1A,PRKACG,PRKCA,PRKAR2A,PRKAR2B,PRKACB,PRKACA,PPP2CA,PPP2R1A,PPP2CB,KIF16B,PDPK1,PLCG1,PIK3CA,PIK3R1,THEM4,PTPN11,SHC1,RPS27A,THBS1,SRC,YWHAB,TSC2,AKT1S1
GO: Biological Process	GO:0044344	cellular response to fibroblast growth factor stimulus	0.0005777	50	160	ADCY3,ADRBK1,AKT1,FIBP,CALM3,CBL,PRKD2,CDK1,CD44,CDKN1B,RAB14,CTNNB1,CYP11A1,MTOR,GAB1,GPC1,GRB2,ITPR2,ITPR1,NPTN,KRAS,FAM20C,MAP2K1,MAP2K2,MAPK3,MAPK1,PRKAR1A,PRKACG,PRKCA,PRKAR2A,PRKAR2B,PRKACB,PRKACA,PPP2CA,PPP2R1A,PPP2CB,KIF16B,PDPK1,PLCG1,PIK3CA,PIK3R1,THEM4,PTPN11,SHC1,RPS27A,THBS1,SRC,YWHAB,TSC2,AKT1S1
GO: Biological Process	GO:0046939	nucleotide phosphorylation	0.0006009	11	20	AK7,AK4,AK2,AK1,MPP6,GUK1,AK3,PNKP,NME2,NME3,RP2
GO: Biological Process	GO:0034243	regulation of transcription elongation from RNA polymerase II promoter	0.0006009	11	20	DAB2,CTR9,CDC73,WDR61,MAP2K1,PAF1,TCEB1,SUPT5H,NELFA,BRD4,NELFE
GO: Biological Process	GO:0006376	mRNA splice site selection	0.0006009	11	20	SRSF9,SF3A3,SF3A1,CELF2,PTBP2,MBNL1,SFSWAP,SRSF1,SRSF5,SF1,SF3A2
GO: Biological Process	GO:0050778	positive regulation of immune response	0.0006019	110	410	A2M,RIPK1,ADA,ARF6,ARRB2,BCL2,BTK,C1R,C1QC,C2,C1QBP,SERPING1,C6,C7,C8A,C8B,C8G,C9,C4BPA,C5,CACNB3,LSM14A,CASP8,PRKD2,CD14,SIN3A,CDK1,CD74,CD44,CD59,CLU,SPG21,MAPK14,CSK,MAPKAPK2,CYLD,LPXN,CFD,DUSP3,MALT1,IGKV1-5,TMEM173,TAB1,VAV3,MASP2,HCK,NCKAP1L,HRG,HPX,HLA-DRA,HLA-DPA1,IL6ST,IGHM,IFI16,ZP4,IRF3,LYN,MAVS,LCP2,MIF,ZC3HAV1,MNDA,ITCH,PAWR,PAK1,PAK2,NCK1,NFKB2,NFKB1,MAP2K1,MAP2K2,MAP2K3,MAPK9,MAP2K…
GO: Biological Process	GO:0006891	intra-Golgi vesicle-mediated transport	0.0006061	15	32	NAPG,NAPA,GOLGA5,COPB1,COPB2,COG1,GOSR1,COG5,COPE,COPG2,COG6,COG3,PACS1,RAB6A,COG2
GO: Biological Process	GO:0043171	peptide catabolic process	0.0006125	8	12	TPP1,CTSH,ECE1,CPQ,IDE,LTA4H,LNPEP,XPNPEP1
GO: Biological Process	GO:0009437	carnitine metabolic process	0.0006125	8	12	ACADM,ACADL,ALDH9A1,CPT1A,CRAT,POR,SHMT1,TMLHE
GO: Biological Process	GO:0046348	amino sugar catabolic process	0.0006125	8	12	CHI3L1,CHIT1,GNPDA1,CTBS,NPL,CHID1,NAGK,RENBP
GO: Biological Process	GO:0043650	dicarboxylic acid biosynthetic process	0.0006125	8	12	KYNU,MTHFD1L,GLS,GOT2,GOT1,HTT,SLC1A3,HAAO
GO: Biological Process	GO:0007006	mitochondrial membrane organization	0.0006145	19	45	TIMM13,SAMM50,BID,BAK1,BAX,BCL2,CNP,MFN2,PPIF,AFG3L2,CLN8,SH3GLB1,HTT,HSPA4,LETM1,OPA1,TOMM22,PEX5,OMA1
GO: Biological Process	GO:0043409	negative regulation of MAPK cascade	0.0006303	37	110	AKT1,AMBP,APOE,CAV1,TAOK3,CSK,DAB2,DAG1,SLC9A3R1,INPP5K,DUSP9,DUSP3,NCOR1,GSTP1,GPS1,PDCD4,IGBP1,KNG1,INPPL1,STK38,LYN,NDRG2,MEN1,LEMD2,ITCH,PEBP1,AIDA,NF1,NF2,PRKCA,PPP2CA,PPP2R1A,PIN1,PTPN6,DAB2IP,UCHL1,TSC2
GO: Biological Process	GO:0071363	cellular response to growth factor stimulus	0.0006304	121	458	NRP1,NRP2,ADCY3,PARP1,ADRBK1,AKT1,APAF1,MYOF,APOE,ARRB2,FIBP,USP9X,FZD1,CALM3,CASK,CBL,CAT,PRKD2,CDK1,CD44,CDK9,CDKN1B,RAB14,COL1A1,USP15,CLU,COL3A1,COL4A2,CTNNB1,UCHL5,MAPK14,MAPKAPK2,DAB2,CYP11A1,TGFBRAP1,MMRN2,INPP5K,NCOR1,NCOR2,EMD,FBN1,MTOR,STRAP,FUT8,GAB1,FMOD,TAB1,GLG1,STUB1,SNX6,F11R,GPC1,GRB2,HRG,HSPA5,HTRA2,ITPR2,ITPR1,EPB41L5,ITGA5,SMAD2,SMAD3,SMAD4,SMAD5,LTBP1,NPTN,KRAS,MEN1,FAM20C,NE…
GO: Biological Process	GO:1901071	glucosamine-containing compound metabolic process	0.0006476	13	26	GNPDA2,CHI3L1,CHIT1,GNPDA1,CTBS,GFPT1,MGEA5,HEXB,GNPNAT1,CHID1,PGM3,NAGK,RENBP
GO: Biological Process	GO:0046461	neutral lipid catabolic process	0.0006476	13	26	APOB,APOA4,APOA2,APOC3,APOC2,ABHD5,MGLL,LIPE,PPP1CC,PPP1CA,PRKACG,PRKACB,PRKACA
GO: Biological Process	GO:0046464	acylglycerol catabolic process	0.0006476	13	26	APOB,APOA4,APOA2,APOC3,APOC2,ABHD5,MGLL,LIPE,PPP1CC,PPP1CA,PRKACG,PRKACB,PRKACA
GO: Biological Process	GO:0010627	regulation of intracellular protein kinase cascade	0.0006521	188	754	RIPK1,TRADD,AGT,AKT1,SQSTM1,AKT2,AMBP,SPAG9,AIP,APOE,ARAF,ARRB1,ARRB2,HGS,C1QBP,C5,CAMK2D,CAV1,CASP1,CASP8,LAMTOR3,PRKD2,AKR1C3,CDC42,CDK1,CD81,CD74,CD44,CHI3L1,PTPLAD1,CCR1,G3BP2,CRK,TAOK3,SORBS3,CTNNB1,ATP6AP2,CRLF3,MAPK14,CSPG4,CSK,LRRK2,MAPKAPK2,DAB2,DAG1,CYLD,SLC9A3R1,MAP4K4,INPP5K,ECM1,DUSP9,DUSP3,AKAP12,NCOR1,EGFR,PTK2B,COPS5,MALT1,ERBB2,PDCD10,MTOR,MAP4K5,GAB1,WLS,FLNA,FAF1,TAB1,GNB2L1,GN…
GO: Biological Process	GO:0006364	rRNA processing	0.0006539	38	114	RRP9,EIF4A3,NOP58,MPHOSPH10,NOC4L,NOLC1,NOL9,DKC1,NUDT16,WBP11,GEMIN4,FBL,UTP14A,FRG1,WDR36,UTP18,NPM3,TBL3,NOP56,UTP20,NOL6,PA2G4,NOP2,EXOSC10,UTP6,NOB1,RPS21,RPS15,RPS19,RPS16,HEATR1,DIS3,EXOSC7,PDCD11,EXOSC2,UTP15,IMP4,SKIV2L2
GO: Biological Process	GO:1901701	cellular response to oxygen-containing compound	0.0006615	110	411	ABCA1,ADD1,ALDH1A2,ANXA1,APOB,APOA4,APEX1,ARRB1,RHOB,PRDX5,FZD1,CAT,LAMTOR3,AKR1C3,CD14,CDK2,SIN3A,CDH1,CDK1,COL1A1,HDAC6,COL5A2,COL6A1,COL4A6,COL4A1,COL3A1,CTNNA1,CTNNB1,MAPK14,CRYGD,CYP11A1,CYP17A1,DNMT1,DNMT3A,INPP5K,PRDX6,DPEP1,CTR9,CDC73,PTK2B,FECH,PRDX3,FER,GNAS,GNB1,GBP1,GSTP1,HCK,GPX1,GPD1,FBLN5,HMGB2,HMBS,ICAM1,JUP,ITPR2,PARK7,IRF3,LYN,LGALS1,MPO,MAP3K5,MGST1,MIF,MMP2,OXCT1,PRDX1,MTDH,UB…
GO: Biological Process	GO:0042058	regulation of epidermal growth factor receptor signaling pathway	0.0006684	25	66	AP2B1,AP2A2,AP2A1,AGT,ARHGEF7,HGS,NCK2,CBL,CDC42,AP2M1,CLTA,CLTC,EGFR,FER,EPS15,EPS15L1,SNX6,GRB2,EPN1,PTPRF,DAB2IP,SHC1,RPS27A,AFAP1L2,STAM
GO: Biological Process	GO:0048584	positive regulation of response to stimulus	0.0006804	298	1254	A2M,RIPK1,ADAM10,ADA,TRADD,PARP1,MBD2,AGT,AIF1,ALB,AKT2,SPAG9,SLC25A6,APEX1,ARF6,ARRB1,ARRB2,ATM,BID,BAK1,BAX,BCL2,BTK,STK24,C1R,C1QC,C2,C1QBP,SERPING1,C6,C7,C8A,C8B,C8G,C9,C4BPA,C5,CAMK2D,CALR,CACNB3,LSM14A,CBL,CAV1,CASP1,CASP8,CAT,LAMTOR3,PRKD2,AKR1C3,CD14,SIN3A,CDC42,AOC3,CDK1,CD81,CD74,CD44,CD59,BCLAF1,CHI3L1,USP34,PTPLAD1,C2CD5,BRCC3,CCR1,COL1A1,CLU,HDAC6,SPG21,DNM1L,CTNNA1,TAOK3,SORBS3,CTNN…
GO: Biological Process	GO:0006638	neutral lipid metabolic process	0.0006949	40	122	ACACA,APOB,APOA4,APOA2,APOE,APOC3,APOC2,CAV1,CAT,DGAT1,CETP,ACSL5,CPT1A,DBI,FASN,ACSL3,ACSL1,ACSL4,LPCAT1,ABHD5,GPX1,GPD1,AGPAT1,IL6ST,MGLL,LIPE,AGPAT3,PPP1CC,PPP1CA,PRKACG,PRKACB,PRKACA,APOBR,PTPN11,SLC25A1,TNXB,NR1H2,ACSL6,GPD1L,LPIN1
GO: Biological Process	GO:0016568	chromatin modification	0.0007082	123	468	ACTL6A,NOC2L,ASH2L,BAZ1B,RPS6KA4,ARRB1,ATM,TRRAP,ARID1A,NIPBL,HAT1,CHD5,SMARCA5,CDK2,RUVBL1,SIN3A,CDK1,CHD4,CHD3,MLL4,CDK9,RNF40,BRCC3,HDAC6,CREBBP,HUWE1,CTBP1,UBR5,MTA2,DAPK3,TRIP12,TBL1XR1,GTF3C4,DNMT1,DNMT3A,CENPV,RSF1,CHD1L,H2AFY,BRE,KDM3B,NCOR1,CTR9,CDC73,WDR61,WDR82,MORF4L1,BRD8,RUVBL2,SRCAP,SMARCAL1,PHF17,SETD7,RBM14,PRMT5,SAP18,MGEA5,HCFC1,HDAC2,CTCF,CARM1,PRMT1,JAK2,EP400,DNAJC2,ARID1B,M…
GO: Biological Process	GO:0019221	cytokine-mediated signaling pathway	0.0007221	100	369	RIPK1,ADAR,TRADD,RPS6KA4,ARIH1,CAMK2D,CAMK2G,PIAS1,LSM14A,CAV1,RAE1,CD74,CD44,EIF4A3,NUPL1,CCR1,CNTFR,NUP153,NUP35,NUP37,CSNK2B,UBE2L6,ECM1,NUP155,CTR9,EIF4G1,EIF4G2,NUP93,PTK2B,ACSL1,FER,NUP50,CDC37,GAB1,FLNB,NUPL2,NUP85,GBP1,GSTP1,HCK,AGPAT1,HSP90AB1,HPX,HLA-DRA,HLA-DPA1,IL6ST,IFIT3,IFIT2,IFIT1,ICAM1,KPNA3,KPNA1,KPNB1,JAK2,JAK1,SLC27A1,IRF3,MAVS,LEPR,KRAS,KPNA4,MX1,NUP88,OAS2,OAS1,NCAM1,NUP107,…
GO: Biological Process	GO:0009064	glutamine family amino acid metabolic process	0.0007723	24	63	PHGDH,GGH,GMPS,ASL,ALDH4A1,CTPS1,FAH,ASRGL1,GLS,GCLC,GOT2,GOT1,GLUL,GFPT1,CTPS2,MECP2,OAT,PPAT,PFAS,ALDH18A1,SLC1A3,DDAH1,DDAH2,ALDH5A1
GO: Biological Process	GO:0050434	positive regulation of viral transcription	0.0007777	22	56	NELFB,NELFCD,CDK9,RSF1,SUPT16H,GTF2F2,MNAT1,NCBP1,POLR2C,POLR2E,POLR2G,POLR2H,POLR2A,POLR2B,PFN1,SMARCB1,SMARCA4,TCEB1,SUPT5H,SSRP1,NELFA,NELFE
GO: Biological Process	GO:0000226	microtubule cytoskeleton organization	0.0007791	85	306	AK7,AP1G1,BUB3,ARHGEF2,ZW10,SMC3,SUN2,SMC1A,DST,CDC42BPA,CAV1,OFD1,NEK7,CDK2,CDC42,CDK1,CHD3,CDKN1B,CETN2,CKAP5,NEDD1,CNP,TPPP3,CLTC,HDAC6,CTNNB1,CRYAB,DAG1,CYLD,DYNC1H1,DYNC1LI2,KIF3B,ROCK2,NCOR1,ARHGEF10,CROCC,FER,FES,FKBP4,TRPV4,TUBGCP2,HSPH1,CHP1,CEP250,FLNA,TACC3,DYNC1LI1,TUBA1B,TUBB4B,TUBGCP3,HTT,DCTN2,TUBGCP4,KIF2A,CHORDC1,LMNA,STMN1,MAP1B,MAP1A,MAP4,MAPT,MLH1,NUMA1,PCM1,MYH9,PPP1R12A,PPP4…
GO: Biological Process	GO:0016567	protein ubiquitination	0.0007985	148	579	FBXO4,FBXO6,AKT1,CDC16,UBE2M,ARRB1,ARRB2,BUB3,ARIH1,HECTD1,BCL2,BLMH,LTN1,CUL4B,CBL,CUL4A,CUL3,CUL2,CUL1,CAV1,HERC4,CDC23,CDK2,CDK1,CUL7,RNF40,PSMD6,CLU,SUFU,HDAC6,HUWE1,SAE1,TRIM28,UBR5,PSMD14,PSME3,DDB1,LRRK2,HECTD3,TRIP12,UBE4A,KLHL36,PSMF1,ATG5,BAG5,NPEPPS,CTR9,CDC73,PTK2B,OS9,MALT1,VCPIP1,CHP1,CRBN,GCLC,VPS28,TRIM22,STUB1,UBE4B,ATG7,HSPA5,PRPF19,UBE2K,TRIM56,RNF213,LNPEP,BIRC6,ITCH,ANAPC1,UB…
GO: Biological Process	GO:0032446	protein modification by small protein conjugation	0.0008022	155	610	FBXO4,FBXO6,AKT1,CDC16,NAE1,UBE2M,UBA3,ARRB1,ARRB2,BUB3,ARIH1,HECTD1,BCL2,BLMH,LTN1,PIAS1,CUL4B,CBL,CUL4A,CUL3,CUL2,CUL1,CAV1,HERC4,CDC23,CDK2,CDK1,UFC1,CUL7,RNF40,PSMD6,CLU,SUFU,HDAC6,HUWE1,UBA2,SAE1,TRIM28,UBR5,PSMD14,PSME3,DDB1,LRRK2,HECTD3,TRIP12,UBE4A,KLHL36,PSMF1,ATG5,BAG5,NPEPPS,CTR9,CDC73,PTK2B,OS9,MALT1,VCPIP1,CHP1,UBA5,CRBN,GCLC,VPS28,TRIM22,STUB1,UBE4B,ATG7,HSPA5,PRPF19,UBE2K,TRIM56,RN…
GO: Biological Process	GO:0000184	nuclear-transcribed mRNA catabolic process, nonsense-mediated decay	0.0008121	39	119	UPF2,EIF4A3,RBM8A,EIF4G1,RNPS1,ETF1,GSPT1,EIF3E,PABPC1,UPF3B,MAGOH,NCBP1,RPL10A,EXOSC10,PPP2CA,PPP2R1A,DCP1B,UPF1,RPL10,RPL19,DCPS,RPS5,RPS9,RPS12,RPS10,RPLP1,RPS4X,RPS3A,RPS3,RPLP0,RPL22,RPS21,GSPT2,RPS27A,RPS15,RPS15A,RPS19,RPS16,CASC3
GO: Biological Process	GO:0030031	cell projection assembly	0.0008143	65	223	AK7,ACTN2,CEP41,ARHGEF7,AIF1,WASL,ARF6,PIP5K1A,NCK2,CAPG,CAPZB,OFD1,CDC42,SH2B1,ACTR3,WASF2,SLC9A3R1,ARHGEF6,INPP5K,PRDX6,DPYSL3,FER,NCKAP1,MTOR,FLNA,KIF3A,FGD3,NUP85,BAIAP2,VAV3,CDC42EP2,SH3GLB1,ASAP1,HRG,SPATA13,ITGA6,INPPL1,WDR35,RAB8A,SH3GLB2,OCRL,PCM1,MYLK,NCK1,SEPT2,PARVB,RDX,RALA,ROCK1,RAC1,RAC2,ARAP1,SSH1,CD2AP,CDC42EP4,SSH3,FNBP1L,CEP164,VCL,TTC8,RPGRIP1L,SRGAP2,ARHGAP26,KANK1,CYFIP1
GO: Biological Process	GO:0051052	regulation of DNA metabolic process	0.0008143	65	223	ANXA3,APEX1,SMC3,SMC1A,CALR,PRKD2,POT1,CDK2,CDC42,SH2B1,CDK1,CDK9,BRCC3,RAD50,TRIM28,UBR5,TRIP12,DNMT3A,NUDT16,BRE,EGFR,ERCC4,CTC1,STAG2,MSH6,MGEA5,H2AFX,HMGB2,KPNA1,INPPL1,MRE11A,MSH2,MSH3,MGMT,MLH1,SMARCAD1,WRNIP1,PCNA,NBN,NF2,PPP4C,PPP2CA,PPP2R1A,PFN1,PDGFRB,PDGFRA,PML,PIK3CA,RAC1,YLPM1,PTPRC,TERF2IP,SETMAR,MAP2K4,SHC1,MPHOSPH8,GTPBP4,RPS3,PID1,SRC,STAT6,CDAN1,PARP10,WAPAL,PDS5A
GO: Biological Process	GO:0043902	positive regulation of multi-organism process	0.0008195	30	85	ADAR,NELFB,NELFCD,CDK9,VAPB,RSF1,INPP5K,SUPT16H,GTF2F2,IFIT1,MNAT1,NCBP1,POLR2C,POLR2E,POLR2G,POLR2H,POLR2A,POLR2B,PFN1,RAD23A,SMARCB1,SMARCA4,TOP2A,TCEB1,SUPT5H,SSRP1,SRPK2,NELFA,TARDBP,NELFE
GO: Biological Process	GO:0008053	mitochondrial fusion	0.0008302	9	15	BAK1,BAX,MFN2,AFG3L2,VAT1,OPA1,MFN1,PID1,OMA1
GO: Biological Process	GO:0032543	mitochondrial translation	0.0008302	9	15	C1QBP,TARS2,YARS2,AARS2,PTCD3,QRSL1,EARS2,DARS2,GFM1
GO: Biological Process	GO:0046503	glycerolipid catabolic process	0.0008336	16	36	APOB,APOA4,APOA2,APOC3,APOC2,PLA2G4C,ABHD5,MGLL,LIPE,PPP1CC,PPP1CA,PRKACG,PRKACB,PRKACA,ENPP2,SMPD4
GO: Biological Process	GO:0009615	response to virus	0.000835	77	273	BANF1,ACTA2,ADAR,AP1M1,AP1S2,AP2B1,AP1B1,AP2A2,AP2A1,AP1G1,APOB,DCLK1,BCL2,C1QBP,PRKRA,LSM14A,CDK6,SAMHD1,SIN3A,ELMO1,ATP6V1H,AP2M1,CLU,UNC13D,DDX41,DDX3X,DDX1,DOCK2,EEF1G,FGR,TMEM173,POLR3A,HNRNPUL1,TRIM22,GBP1,HCK,IVNS1ABP,IFI44,APOBEC3C,IFIT3,IFIT2,IFIT1,IFI16,TRIM56,IRF3,MAVS,STMN1,MX1,ZC3HAV1,ITCH,OAS2,OAS1,PAK2,PCBP2,ABCF3,DNAJC3,DDX60,POLR3E,PML,PACS1,RELA,TBK1,PYCARD,DHX36,ABCE1,RAC1,PTPR…
GO: Biological Process	GO:0007041	lysosomal transport	0.000851	19	46	ARSB,RHOB,HGS,STX7,AP3B1,SCARB2,ZFYVE16,M6PR,AP3M1,SNX27,MTM1,NPC1,NEDD4,SCYL2,AKTIP,KIF13A,SORT1,TSG101,HOOK3
GO: Biological Process	GO:0035666	TRIF-dependent toll-like receptor signaling pathway	0.0008646	25	67	RIPK1,CD14,CDK1,MAPK14,MAPKAPK2,DUSP3,TAB1,IRF3,NFKB2,NFKB1,MAP2K1,MAP2K2,MAP2K3,MAPK9,MAP2K6,MAPK3,MAPK1,RELA,TBK1,MAP2K4,RPS6KA1,RPS6KA2,RPS6KA3,RPS27A,MAPKAPK3
GO: Biological Process	GO:0055072	iron ion homeostasis	0.0008722	31	89	ABCB7,ACO1,ATP6V0D1,ATP6V1B1,ATP6V1B2,ATP6V0C,ATP6V0A1,ATP6V1E1,ATP6V1C1,ATP6V1H,CP,ABCB6,ATP6V1D,ABCG2,FECH,TCIRG1,HTT,HPX,HMOX2,HMOX1,SFXN3,SFXN2,IREB2,LTF,NUBP1,TTC7A,SOD1,TF,TFRC,SRI,SFXN1
GO: Biological Process	GO:0051098	regulation of binding	0.0008763	59	199	NRP1,ADD1,PARP1,SPAG9,ANXA2,ARRB1,ARRB2,BAK1,BAX,BCL2,CALD1,CAV1,SIN3A,CDC42,CSNK2B,DAB2,RSF1,EPB41,TMEM173,CRBN,CARM1,HSP90AB1,HSPA4,HMOX1,HMGB2,IFIT2,IFIT1,IFI16,JAK2,EPB41L5,PARK7,SMAD2,SMAD3,SMAD4,LRPAP1,MEN1,PCBD1,AIDA,NFIB,PON1,MAPK3,PEX14,PACS1,AKTIP,RAN,SMARCD3,SMARCA4,S100A10,GTPBP4,TGFBR3,THBS1,SPTA1,SRC,HABP4,KDM1A,ADNP,BRD4,WAPAL,HIST1H2BA
GO: Biological Process	GO:0007040	lysosome organization	0.0009056	15	33	ABCA1,ACP2,ARSB,ATP6V0C,TPP1,CLN8,GAA,HEXA,HEXB,VPS18,NAGLU,PPT1,AKTIP,LAMTOR1,HOOK3
GO: Biological Process	GO:0032392	DNA geometric change	0.0009056	15	33	ATRX,POT1,RUVBL1,RAD50,DDX1,ASCC3,RUVBL2,MRE11A,MCM4,MCM6,MCM2,MCM7,NBN,RECQL,PURA
GO: Biological Process	GO:0050853	B cell receptor signaling pathway	0.0009056	15	33	BCL2,BTK,LPXN,VAV3,NCKAP1L,IGHM,LYN,MNDA,MAPK1,PRKCB,PLCG2,PTPN6,PTPRC,SYK,LAT2
GO: Biological Process	GO:0006730	one-carbon metabolic process	0.0009056	15	33	CA4,CA2,CA1,MTHFD1L,ALDH1L1,AHCYL1,CA5B,GNMT,MAT2B,MTHFD1,MTHFR,MAT2A,SHMT1,SHMT2,AHCYL2
GO: Biological Process	GO:0019692	deoxyribose phosphate metabolic process	0.0009056	15	33	ADA,MBD4,ADK,AK2,DGUOK,NUDT16,DUT,NUDT18,DERA,GUK1,MGEA5,AK3,SMUG1,PGM2,NT5C
GO: Biological Process	GO:0006895	Golgi to endosome transport	0.0009061	7	10	AP2A1,RAB14,DOPEY2,KIF16B,SORT1,MON2,VPS13A
GO: Biological Process	GO:0034763	negative regulation of transmembrane transport	0.0009061	7	10	AKT1,AKT2,APOA2,APOC3,CRBN,TRIM27,THBS1
GO: Biological Process	GO:0051016	barbed-end actin filament capping	0.0009061	7	10	ADD1,CAPG,EVL,TRIOBP,GSN,MTPN,TWF1
GO: Biological Process	GO:0006012	galactose metabolic process	0.0009061	7	10	GLB1,GALT,GALE,GALK2,GALK1,PGM5,PGM1
GO: Biological Process	GO:2000114	regulation of establishment of cell polarity	0.0009061	7	10	ROCK2,PTK2B,GNB2L1,ARFGEF1,RAP1B,ROCK1,KANK1
GO: Biological Process	GO:0008643	carbohydrate transport	0.0009188	49	159	AKT1,AK1,AKT2,CLTCL1,RAE1,PEA15,AOC3,SLC35A4,C2CD5,NUPL1,NUP153,NUP35,NUP37,ASPSCR1,INPP5K,NUP155,NUP93,FABP5,NUP50,NUPL2,NUP85,MGEA5,SORBS1,HK2,HK1,HK3,M6PR,MIF,NUP88,NUP107,PRKCA,PRKCB,PRKAA1,ITLN1,ENPP1,PIK3R1,NUP133,SEH1L,PTPN11,SLC2A1,SORT1,PID1,STXBP3,YES1,NUP54,NUP214,NUP205,NUP210,NUP160
GO: Biological Process	GO:0032200	telomere organization	0.0009533	26	71	FBXO4,PARP1,ATM,POT1,RAD50,DKC1,FEN1,ERCC4,CTC1,XRCC6,PTGES3,MRE11A,PCNA,NBN,POLD1,PRKDC,PML,RFC2,RFC5,RFC4,YLPM1,XRN1,TERF2IP,TEP1,TNKS1BP1,WRAP53
GO: Biological Process	GO:0006081	cellular aldehyde metabolic process	0.0009587	18	43	ALDH9A1,ALDH1A1,ALDH3A2,ALDH1A2,ALDH7A1,AKR1C3,RDH10,ESD,GLO1,RDH11,AKR1A1,GPI,IDH2,IDH1,RELA,TKT,TALDO1,AKR7A3
GO: Biological Process	GO:0007597	blood coagulation, intrinsic pathway	0.0009668	10	18	A2M,C1QBP,SERPING1,F12,F2,F9,KNG1,KLKB1,PRCP,VWF
GO: Biological Process	GO:0015682	ferric iron transport	0.0009701	14	30	ATP6V0D1,ATP6V1B1,ATP6V1B2,ATP6V0C,ATP6V0A1,ATP6V1E1,ATP6V1C1,ATP6V1H,CLTC,ATP6V1D,DNM2,TCIRG1,TF,TFRC
GO: Biological Process	GO:0072512	trivalent inorganic cation transport	0.0009701	14	30	ATP6V0D1,ATP6V1B1,ATP6V1B2,ATP6V0C,ATP6V0A1,ATP6V1E1,ATP6V1C1,ATP6V1H,CLTC,ATP6V1D,DNM2,TCIRG1,TF,TFRC
GO: Biological Process	GO:0033572	transferrin transport	0.0009701	14	30	ATP6V0D1,ATP6V1B1,ATP6V1B2,ATP6V0C,ATP6V0A1,ATP6V1E1,ATP6V1C1,ATP6V1H,CLTC,ATP6V1D,DNM2,TCIRG1,TF,TFRC
GO: Biological Process	GO:0016072	rRNA metabolic process	0.0009726	39	120	RRP9,EIF4A3,NOP58,MPHOSPH10,NOC4L,NOLC1,NOL9,DKC1,NUDT16,WBP11,GEMIN4,FBL,UTP14A,FRG1,WDR36,UTP18,NPM3,TBL3,NOP56,UTP20,NOL6,PA2G4,NOP2,EXOSC10,UTP6,NOB1,XRN1,RPS21,RPS15,RPS19,RPS16,HEATR1,DIS3,EXOSC7,PDCD11,EXOSC2,UTP15,IMP4,SKIV2L2
GO: Biological Process	GO:0050851	antigen receptor-mediated signaling pathway	0.001011	41	128	ADA,BCL2,BTK,CACNB3,PRKD2,SPG21,CSK,LPXN,DUSP3,MALT1,VAV3,NCKAP1L,HLA-DRA,HLA-DPA1,IGHM,LYN,LCP2,MNDA,PAWR,PAK1,PAK2,NCK1,NFKB1,MAPK1,PRKCB,PDPK1,ENAH,PLCG1,PLCG2,PIK3CA,PIK3R1,RELA,PHPT1,PTPN6,PTPRC,RPS27A,THY1,SYK,LAT2,WAS,VASP
GO: Biological Process	GO:0034109	homotypic cell-cell adhesion	0.001019	20	50	ANK3,CD44,GSTP1,LYN,LGALS1,FERMT3,NCAM1,MAP2K1,PRKG1,PRKCA,PDGFRA,PLEK,SERPINE2,S100A9,S100A8,STXBP1,STXBP3,STK10,SYK,UBASH3B
GO: Biological Process	GO:0043408	regulation of MAPK cascade	0.001029	130	503	RIPK1,AGT,AKT1,AKT2,AMBP,SPAG9,APOE,ARAF,ARRB1,ARRB2,C5,CAMK2D,CAV1,LAMTOR3,PRKD2,CDC42,CDK1,CD81,CD74,CD44,CHI3L1,PTPLAD1,CCR1,CRK,TAOK3,SORBS3,CTNNB1,ATP6AP2,MAPK14,CSPG4,CSK,LRRK2,MAPKAPK2,DAB2,DAG1,SLC9A3R1,MAP4K4,INPP5K,DUSP9,DUSP3,NCOR1,EGFR,PTK2B,COPS5,ERBB2,PDCD10,MAP4K5,GAB1,TAB1,GNAI2,GSTP1,GPS1,GRB2,RAPGEF1,PDCD4,IGBP1,IGHM,KNG1,JAK2,ITGAV,ITGA1,INPPL1,STK38,ILK,LYN,TAOK1,LMNB1,KIDINS2…
GO: Biological Process	GO:0009185	ribonucleoside diphosphate metabolic process	0.001033	11	21	AK2,AK1,ATP5C1,ATP5A1,ENTPD1,ENTPD2,NUDT16,NUDT5,NUDT18,GUK1,AK3
GO: Biological Process	GO:0043330	response to exogenous dsRNA	0.001033	11	21	DDX1,TMEM173,IFIT1,IRF3,MAVS,ZC3HAV1,MAPK3,MAPK1,DHX36,DDX58,STAT1
GO: Biological Process	GO:0060334	regulation of interferon-gamma-mediated signaling pathway	0.001045	12	24	PIAS1,CDC37,HSP90AB1,HPX,JAK2,JAK1,MED1,PTPN1,PTPN11,PTPN6,STAT1,NR1H2
GO: Biological Process	GO:0019433	triglyceride catabolic process	0.001045	12	24	APOB,APOA4,APOC3,APOC2,ABHD5,MGLL,LIPE,PPP1CC,PPP1CA,PRKACG,PRKACB,PRKACA
GO: Biological Process	GO:0045727	positive regulation of translation	0.001109	25	68	ABCF1,EIF2B5,C1QBP,EIF4A3,CIRBP,CTNNB1,DDX3X,ELAVL1,PTK2B,ERBB2,CHP1,MTOR,RPS27L,ARFGEF1,PAIP1,PABPC1,UPF3B,PAWR,MAPK3,MAPK1,SOAT1,FAM129A,RPS4X,THBS1,PLCB1
GO: Biological Process	GO:0031647	regulation of protein stability	0.00111	37	113	NAPG,ANK2,APOA2,USP13,FBXO7,BCL2,CALR,CDC42,CLU,CTSH,ISOC2,CDC73,NCKAP1,CHP1,FLNA,GNAQ,HCFC1,PARK7,SMAD3,COG3,COG7,PRKDC,CDKN2AIP,PML,IPO9,PYCARD,STX12,GTPBP4,STXBP1,TRIM21,AAK1,WFS1,USP4,MORC3,USP7,BAG6,FBXW11
GO: Biological Process	GO:0010942	positive regulation of cell death	0.001135	132	513	RIPK1,CRADD,FAM162A,TRADD,AGT,AKT1,ARHGEF7,ALDH1A1,NAE1,ALDH1A2,UBE2M,ANXA5,APAF1,ANXA1,APOE,ARRB1,RHOB,ATM,PDCD5,BAG1,BID,BAK1,BAX,RBM10,STK24,FOXL2,NSMAF,C1QBP,C6,C9,C5,PRKRA,CASP1,CASP7,AKR1C3,CDC42,CD44,BCLAF1,CDKN1B,CLU,HDAC6,CTNNB1,LRRK2,DDX3X,DAPK3,CYLD,DNM2,NQO1,ITM2B,DFNA5,ENDOG,DDX20,FAF1,GNB2L1,COL18A1,SH3GLB1,NDUFA13,TXNIP,AGRN,GPX1,PDIA3,HTATIP2,HRG,HIP1,HTRA2,IGF2R,IFIT2,KNG1,KIAA19…
GO: Biological Process	GO:2001056	positive regulation of cysteine-type endopeptidase activity	0.001137	38	117	RIPK1,FAM162A,TRADD,APAF1,AIFM1,BAK1,BAX,FOXL2,C6,C9,CASP1,CASP7,CASP8,CDKN1B,PDCD6,DDX3X,PPM1F,GNB2L1,RPS27L,FIS1,HIP1,HTRA2,IFI16,JAK2,SMAD3,MEN1,MAP3K5,MAPK9,NLRP2,PML,PYCARD,S100A9,S100A8,MTCH1,RPS3,UACA,IFT57,VCP
GO: Biological Process	GO:0046148	pigment biosynthetic process	0.001161	19	47	ADA,AP3D1,ALAD,GMPS,APRT,CPOX,CECR1,FECH,GART,PAICS,HPRT1,HMBS,IREB2,MYO5A,PPOX,PPAT,PRPS1,SHMT1,UROD
GO: Biological Process	GO:0033692	cellular polysaccharide biosynthetic process	0.001162	23	61	ACADM,AGL,AKT1,AKT2,COLGALT1,INPP5K,MTOR,CERCAM,GFPT1,GBE1,GYS1,GYG1,PTGES3,SORBS1,MAT2B,PPP1CA,CSGALNACT2,PGM5,PGM1,ENPP1,CMAS,PGM2,UGP2
GO: Biological Process	GO:0006661	phosphatidylinositol biosynthetic process	0.001179	33	98	DPM1,MTMR1,MTMR2,ATM,MTMR6,PIP5K1A,CD81,FIG4,PIGT,PIGK,ALG12,ALG9,INPP5K,CDIPT,SLC27A1,INPPL1,INPP4A,IMPA1,MTM1,OCRL,VAC14,PLCG2,PIK3C2A,PIK3CA,PIK3C3,PIK3R1,PI4KA,PIP4K2A,MTMR14,PIGN,PIGS,SACM1L,PIK3R4
GO: Biological Process	GO:0033157	regulation of intracellular protein transport	0.001207	54	181	PARP1,ANK3,ASPH,FZD1,CDH1,CDC42,CDK1,G3BP2,SUFU,UBR5,MAPK14,CSK,NOLC1,DAB2,CYLD,INPP5K,EMD,EGFR,ACSL3,CHP1,MTOR,TMEM173,FLNA,FAF1,RBPMS,TACC3,LYPLA1,GNAQ,HCLS1,CHERP,HSP90AB1,LYPLAL1,JUP,JAK2,SMAD3,SMAD4,MAVS,LCP1,PRDX1,GOPC,NF1,MED1,PRKACA,XPO4,RANGAP1,PTPN11,DAB2IP,DDX58,TLR2,UACA,XPO1,TRIP6,KANK1,FBXW11
GO: Biological Process	GO:0000280	nuclear division	0.001212	102	383	CDC16,BUB3,ARHGEF2,ZW10,ATM,SMC3,CLTCL1,NIPBL,USP9X,SMC1A,CUL3,OFD1,CDC23,AHCTF1,CDK2,RUVBL1,CDC42,CDK11B,SEPT7,SH2B1,CDK1,CDK13,CETN2,CKAP5,NEDD1,CLTC,NUP37,CSNK1A1,DCTN1,NOLC1,DAPK3,DIS3L2,KIF3B,CENPV,ARHGEF10,MAPRE2,SUGT1,TXNL4A,VCPIP1,FLNA,MCMBP,NUP85,DYNC1LI1,TUBB3,PRMT5,STAG1,STAG2,NUDC,DCTN2,HTATIP2,ASPM,EML4,KIF2A,TAOK1,BIRC6,TUBB2B,NUMA1,ANAPC1,PEBP1,NEK9,PPP1R12A,ANAPC4,NUP107,SEPT2,PPP…
GO: Biological Process	GO:0007067	mitosis	0.001212	102	383	CDC16,BUB3,ARHGEF2,ZW10,ATM,SMC3,CLTCL1,NIPBL,USP9X,SMC1A,CUL3,OFD1,CDC23,AHCTF1,CDK2,RUVBL1,CDC42,CDK11B,SEPT7,SH2B1,CDK1,CDK13,CETN2,CKAP5,NEDD1,CLTC,NUP37,CSNK1A1,DCTN1,NOLC1,DAPK3,DIS3L2,KIF3B,CENPV,ARHGEF10,MAPRE2,SUGT1,TXNL4A,VCPIP1,FLNA,MCMBP,NUP85,DYNC1LI1,TUBB3,PRMT5,STAG1,STAG2,NUDC,DCTN2,HTATIP2,ASPM,EML4,KIF2A,TAOK1,BIRC6,TUBB2B,NUMA1,ANAPC1,PEBP1,NEK9,PPP1R12A,ANAPC4,NUP107,SEPT2,PPP…
GO: Biological Process	GO:0000086	G2/M transition of mitotic cell cycle	0.001244	47	153	CEP41,NAE1,CAMK2D,OFD1,CDK2,CDK1,CETN2,CKAP5,NEDD1,AKAP9,ACTR1A,DCTN1,DYNC1H1,DYNC1I2,DNM2,FHL1,TUBGCP2,CEP250,CNTRL,TUBB4B,TUBGCP3,KHDRBS1,DCTN2,TUBGCP4,LMNB1,MTA3,MNAT1,NUMA1,ODF2,PCM1,NBN,ANAPC4,PRKAR2B,PRKACA,PPP2R1A,USP47,TOP2A,TOP2B,TAF1,CEP164,YWHAG,MAPRE1,TUBG1,TUBA4A,CLASP1,BRD4,PLCB1
GO: Biological Process	GO:0007229	integrin-mediated signaling pathway	0.00126	30	87	ADAM10,DST,CUL3,COL3A1,DAB2,DOCK1,PTK2B,FGR,FUT8,VAV3,HCK,ARHGAP35,ITGB2,ITGB5,ITGAL,ITGA9,ITGAV,ITGA1,ITGA3,ITGA5,ITGA6,ILK,CCM2,MYH9,PRKD1,PLEK,ERBB2IP,PTK2,SYK,VAV1
GO: Biological Process	GO:0061041	regulation of wound healing	0.00126	30	87	ANXA2,APOE,SERPING1,CASK,CAV1,CPB2,F12,F2,ARFGEF1,HRG,KNG1,KLKB1,LYN,SMAD3,MYLK,PROC,PRKG1,PRKCA,PDGFRA,SERPINF2,ANO6,PLEK,PLG,SERPINE2,THBS1,TNFAIP3,PRDX2,SYK,UBASH3B,KANK1
GO: Biological Process	GO:0090330	regulation of platelet aggregation	0.001284	6	8	LYN,PRKG1,PRKCA,SERPINE2,SYK,UBASH3B
GO: Biological Process	GO:0032261	purine nucleotide salvage	0.001284	6	8	ADA,ADK,AMPD3,AMPD2,APRT,HPRT1
GO: Biological Process	GO:0006208	pyrimidine nucleobase catabolic process	0.001284	6	8	CRMP1,DPYSL3,DPYSL2,DPYD,DPYSL4,ALDH6A1
GO: Biological Process	GO:0051095	regulation of helicase activity	0.001284	6	8	POT1,MSH6,IFIT1,MSH2,MSH3,SSBP1
GO: Biological Process	GO:0006573	valine metabolic process	0.001284	6	8	HIBCH,BCAT2,HIBADH,ACAD8,ALDH6A1,STAT5A
GO: Biological Process	GO:0046784	intronless viral mRNA export from host nucleus	0.001284	6	8	THOC5,THOC6,THOC1,ALYREF,THOC2,DDX39B
GO: Biological Process	GO:0034379	very-low-density lipoprotein particle assembly	0.001284	6	8	APOB,APOC3,DGAT1,ACSL3,FECH,SOAT1
GO: Biological Process	GO:1900024	regulation of substrate adhesion-dependent cell spreading	0.001284	6	8	C1QBP,CALR,ARPC2,DAB2,TRIOBP,KANK1
GO: Biological Process	GO:0030193	regulation of blood coagulation	0.001289	24	65	ANXA2,APOE,SERPING1,CAV1,CPB2,F12,F2,HRG,KNG1,KLKB1,LYN,PROC,PRKG1,PRKCA,PDGFRA,SERPINF2,ANO6,PLEK,PLG,SERPINE2,THBS1,PRDX2,SYK,UBASH3B
GO: Biological Process	GO:1900046	regulation of hemostasis	0.001289	24	65	ANXA2,APOE,SERPING1,CAV1,CPB2,F12,F2,HRG,KNG1,KLKB1,LYN,PROC,PRKG1,PRKCA,PDGFRA,SERPINF2,ANO6,PLEK,PLG,SERPINE2,THBS1,PRDX2,SYK,UBASH3B
GO: Biological Process	GO:0030207	chondroitin sulfate catabolic process	0.001311	8	13	ARSB,BGN,VCAN,CSPG4,DCN,HEXA,HEXB,IDS
GO: Biological Process	GO:0031958	corticosteroid receptor signaling pathway	0.001311	8	13	ARID1A,CALR,RBM14,PTGES3,JAK2,NEDD4,PHB,YWHAH
GO: Biological Process	GO:0034332	adherens junction organization	0.00132	18	44	ACTG1,NUMB,CDH11,CDH3,CDH1,CDC42,CTNNA1,CTNND1,CTNNB1,RAB8B,DSP,JUP,MLLT4,PVRL2,CADM1,TBCD,SRC,VCL
GO: Biological Process	GO:0043280	positive regulation of cysteine-type endopeptidase activity involved in apoptotic process	0.001329	37	114	RIPK1,FAM162A,TRADD,APAF1,AIFM1,BAK1,BAX,FOXL2,C6,C9,CASP1,CASP7,CASP8,CDKN1B,PDCD6,DDX3X,PPM1F,GNB2L1,RPS27L,FIS1,HIP1,HTRA2,JAK2,SMAD3,MEN1,MAP3K5,MAPK9,NLRP2,PML,PYCARD,S100A9,S100A8,MTCH1,RPS3,UACA,IFT57,VCP
GO: Biological Process	GO:0032231	regulation of actin filament bundle assembly	0.001362	20	51	ARHGAP6,KANK2,SORBS3,INPP5K,ROCK2,ARHGEF10,PPM1F,MTOR,SYNPO,SMAD3,PAK1,KANK3,NF2,PFN1,SERPINF2,PLEK,FHOD1,ROCK1,ARAP1,TPM1
GO: Biological Process	GO:0002756	MyD88-independent toll-like receptor signaling pathway	0.00141	25	69	RIPK1,CD14,CDK1,MAPK14,MAPKAPK2,DUSP3,TAB1,IRF3,NFKB2,NFKB1,MAP2K1,MAP2K2,MAP2K3,MAPK9,MAP2K6,MAPK3,MAPK1,RELA,TBK1,MAP2K4,RPS6KA1,RPS6KA2,RPS6KA3,RPS27A,MAPKAPK3
GO: Biological Process	GO:0042168	heme metabolic process	0.001444	14	31	ALAD,AMBP,BLVRB,BLVRA,CPOX,FECH,HEBP1,HPX,HMOX2,HMOX1,HMBS,IREB2,PPOX,UROD
GO: Biological Process	GO:0022407	regulation of cell-cell adhesion	0.001474	29	84	ADA,ALOX15,ANK3,CDH1,CD44,DPP4,EPHB3,GSTP1,JAK2,ITGAL,EPB41L5,ITGA6,LYN,LGALS1,FERMT3,NF2,MAP2K1,PRKG1,PRKCA,SERPINF2,PLG,PIK3R1,SERPINE2,PTK2,GTPBP4,TNFAIP3,SYK,KIFAP3,UBASH3B
GO: Biological Process	GO:0070085	glycosylation	0.001493	76	274	DPM1,PARP1,B3GAT3,CANX,CALR,MLEC,STT3B,SEC24D,PARP3,PARP2,ALG12,ALG3,DDOST,DAD1,ALG9,SEC24C,MAN1A2,SEC24A,CHP1,MAN1B1,FUT8,SEC23A,SAR1B,GNAQ,SEC24B,GNA11,GALNT2,GFPT1,MGEA5,ARFGEF1,PDIA3,STT3A,COG6,LMAN1,B3GALTL,COG3,MAN1A1,MAN2A1,MGAT1,MPI,NPC1,OAS2,UGGT1,POGLUT1,ALG5,GMPPB,GMPPA,GNPNAT1,COG7,TRAK2,PRKCSH,FUT11,PGM3,PMM2,MCFD2,SERPINA1,EOGT,SEC13,RPN2,RPN1,ALG2,COG2,SEC31A,SIRT2,VCP,PARP10,A4GAL…
GO: Biological Process	GO:0016601	Rac protein signal transduction	0.001495	17	41	AIF1,ARF6,RHOG,CAMK2D,PTPLAD1,CHN1,ELMO1,CRK,WASF2,DOCK2,EPHB3,MTOR,NISCH,AGRN,KRAS,NF1,PYCARD
GO: Biological Process	GO:0009311	oligosaccharide metabolic process	0.001495	17	41	CTBS,MPDU1,MAN1A2,MAN1B1,FUT8,GAA,GLA,GM2A,HEXB,MAN2A1,NAGA,PRKCSH,PGM5,PGM1,COG2,MOGS,GANAB
GO: Biological Process	GO:0090305	nucleic acid phosphodiester bond hydrolysis	0.001524	26	73	APAF1,AIFM1,BAX,FOXL2,PCF11,CSTF3,CSTF1,DDX1,ENDOG,ERCC4,NUDT21,HMGB2,UTP20,KPNA1,KPNB1,MRE11A,MOV10,SMARCAD1,NCBP1,CPSF1,PPT1,SOD1,SETMAR,RPS21,XRN2,TSN
GO: Biological Process	GO:0034138	toll-like receptor 3 signaling pathway	0.001524	26	73	RIPK1,CD14,CDK1,MAPK14,MAPKAPK2,DUSP3,TAB1,IRF3,NFKB2,NFKB1,MAP2K1,MAP2K2,MAP2K3,MAPK9,MAP2K6,MAPK3,MAPK1,RELA,TBK1,MAP2K4,RPS6KA1,RPS6KA2,RPS6KA3,RPS27A,TNFAIP3,MAPKAPK3
GO: Biological Process	GO:0051607	defense response to virus	0.001528	57	195	ADAR,AP1M1,AP1S2,AP2B1,AP1B1,AP2A2,AP2A1,AP1G1,BCL2,C1QBP,LSM14A,SAMHD1,SIN3A,ELMO1,ATP6V1H,AP2M1,UNC13D,DDX41,DOCK2,TMEM173,POLR3A,TRIM22,GBP1,HCK,APOBEC3C,IFIT3,IFIT2,IFIT1,IFI16,TRIM56,IRF3,MAVS,MX1,ZC3HAV1,ITCH,OAS2,OAS1,PAK2,PCBP2,ABCF3,DNAJC3,DDX60,POLR3E,PML,PACS1,RELA,TBK1,PYCARD,RAC1,PTPRC,DDX58,TNFAIP3,IFIT5,TRIM5,STAT1,STAT2,TRIM25
GO: Biological Process	GO:0006486	protein glycosylation	0.001529	75	270	DPM1,PARP1,B3GAT3,CANX,CALR,MLEC,STT3B,SEC24D,PARP3,PARP2,ALG12,ALG3,DDOST,DAD1,ALG9,SEC24C,MAN1A2,SEC24A,CHP1,MAN1B1,FUT8,SEC23A,SAR1B,GNAQ,SEC24B,GNA11,GALNT2,GFPT1,MGEA5,ARFGEF1,PDIA3,STT3A,LMAN1,B3GALTL,COG3,MAN1A1,MAN2A1,MGAT1,MPI,NPC1,OAS2,UGGT1,POGLUT1,ALG5,GMPPB,GMPPA,GNPNAT1,COG7,TRAK2,PRKCSH,FUT11,PGM3,PMM2,MCFD2,SERPINA1,EOGT,SEC13,RPN2,RPN1,ALG2,COG2,SEC31A,SIRT2,VCP,PARP10,A4GALT,ADN…
GO: Biological Process	GO:0043413	macromolecule glycosylation	0.001529	75	270	DPM1,PARP1,B3GAT3,CANX,CALR,MLEC,STT3B,SEC24D,PARP3,PARP2,ALG12,ALG3,DDOST,DAD1,ALG9,SEC24C,MAN1A2,SEC24A,CHP1,MAN1B1,FUT8,SEC23A,SAR1B,GNAQ,SEC24B,GNA11,GALNT2,GFPT1,MGEA5,ARFGEF1,PDIA3,STT3A,LMAN1,B3GALTL,COG3,MAN1A1,MAN2A1,MGAT1,MPI,NPC1,OAS2,UGGT1,POGLUT1,ALG5,GMPPB,GMPPA,GNPNAT1,COG7,TRAK2,PRKCSH,FUT11,PGM3,PMM2,MCFD2,SERPINA1,EOGT,SEC13,RPN2,RPN1,ALG2,COG2,SEC31A,SIRT2,VCP,PARP10,A4GALT,ADN…
GO: Biological Process	GO:0060191	regulation of lipase activity	0.001554	36	111	ADCY3,ADRBK1,AGT,APOA4,APOA2,APOC3,APOC2,ARL1,ARHGAP6,CALM3,TIPRL,EGFR,GNAQ,ABHD5,NCKAP1L,GNA13,JAK2,ITPR2,ITPR1,LRP1,POR,PRKAR1A,PRKACG,PRKCA,PRKAR2A,PRKAR2B,PRKACB,PRKACA,PPT1,PPP2R4,PDGFRB,PDGFRA,PLCG1,PLCB2,SORT1,NR1H2
GO: Biological Process	GO:0031952	regulation of protein autophosphorylation	0.001555	13	28	RAD50,CHP1,RAP2C,MRE11A,NBN,EEF2K,PPP2R5D,PPP2CA,ENPP1,RAP2B,RAP2A,PTPRC,SRC
GO: Biological Process	GO:0009151	purine deoxyribonucleotide metabolic process	0.001559	9	16	ADA,ADK,AK2,DGUOK,NUDT16,NUDT18,GUK1,MGEA5,AK3
GO: Biological Process	GO:0033013	tetrapyrrole metabolic process	0.001563	19	48	SUCLA2,ALAD,AMBP,BLVRB,BLVRA,CPOX,ABCB6,FECH,HEBP1,HPX,HMOX2,HMOX1,HMBS,IREB2,PPOX,TCN2,SPTB,SPTA1,UROD
GO: Biological Process	GO:0044272	sulfur compound biosynthetic process	0.001611	38	119	EIF2B2,EIF2B4,B3GAT3,PAPSS2,PAPSS1,BHMT,BGN,GLCE,CTNNB1,GGCT,CSAD,VCAN,CSPG4,DCN,EIF2B1,EXTL3,FMOD,GCLC,GOT1,APIP,HAGH,GSS,MAT2B,LUM,MTHFD1,MTHFR,MTAP,MTR,MAT2A,MGST2,MGST3,OMD,OGN,CSGALNACT2,PRELP,CNDP2,ADI1,MRI1
GO: Biological Process	GO:1901615	organic hydroxy compound metabolic process	0.001625	110	421	DPM1,ABCA1,ACADL,ACADVL,ADH1B,ADH7,ADRBK2,MTMR2,ALDH1A1,ALDH1B1,ALDH3A2,APOB,APOA4,APOA2,APOE,APOC3,ALDH7A1,BCL2,DAK,CAT,AKR1C3,PLA2G4C,SNX17,ISYNA1,IP6K1,CETP,CYB5R1,COMT,CRYM,CYP11A1,CYP27A1,CYP17A1,CYP7B1,CYB5R3,GGPS1,PCYT1B,INPP5K,SPTLC2,PTK2B,ACSL3,FECH,FDXR,FDPS,PNPLA6,EPHX2,CLN8,FABP5,G6PD,PLBD1,LPCAT1,ACAA2,GOT1,CPQ,GALK1,SIGMAR1,GC,HDLBP,NSDHL,GPD2,HSD17B1,HPRT1,ENPP6,IDI1,SLC27A1,INPPL1…
GO: Biological Process	GO:0032147	activation of protein kinase activity	0.001641	72	258	RIPK1,ADCY3,AGT,SPAG9,ARAF,ARRB1,C5,LAMTOR3,CDK1,CD81,CD74,CHI3L1,PTPLAD1,CCR1,CRK,MAPK14,CSPG4,LRRK2,MAPKAPK2,DAB2,DLG1,EGFR,PTK2B,MALT1,MAP4K5,GAB1,TAB1,GNAI2,CAMKK2,RAPGEF1,IGHM,JAK2,ITGA1,KIDINS220,KRAS,MAP3K4,MAP3K5,MAP2K1,MAP2K2,MAP2K3,MAP2K6,PKN1,MAPK3,MAPK1,PRKAR1A,PRKACG,PRKAR2A,PRKAR2B,PRKAA1,PRKACB,PRKACA,PDPK1,PLCG1,RAP1A,LAMTOR2,PTPN11,PTPRC,DAB2IP,SOD1,MAP2K4,SHC1,RPS27A,TGFBR2,THBS…
GO: Biological Process	GO:0060330	regulation of response to interferon-gamma	0.001644	12	25	PIAS1,CDC37,HSP90AB1,HPX,JAK2,JAK1,MED1,PTPN1,PTPN11,PTPN6,STAT1,NR1H2
GO: Biological Process	GO:0007032	endosome organization	0.001644	12	25	USP8,DNM1,VPS4B,ARFGEF2,VPS18,RAB22A,PIK3C3,AKTIP,RAB5B,RAB5C,LAMTOR1,HOOK3
GO: Biological Process	GO:0000271	polysaccharide biosynthetic process	0.001644	24	66	ACADM,AGL,AKT1,AKT2,COLGALT1,INPP5K,MTOR,CERCAM,GFPT1,GBE1,GYS1,GYG1,PTGES3,SORBS1,MAT2B,NFKB1,PPP1CA,CSGALNACT2,PGM5,PGM1,ENPP1,CMAS,PGM2,UGP2
GO: Biological Process	GO:0006970	response to osmotic stress	0.001644	24	66	AGT,AKT2,ANXA7,BAX,KMO,SLC12A6,NOLC1,DDX3X,CYP11A1,TRIP10,PTK2B,TRPV4,XRCC6,HSP90AB1,MYLK,MAPK13,PKN1,PDPK1,VAC14,RAC1,SLC12A2,SLC2A1,NEDD4L,CUL5
GO: Biological Process	GO:0032852	positive regulation of Ral GTPase activity	0.00165	4	4	AKT2,RALGAPA2,RALGAPB,RALGAPA1
GO: Biological Process	GO:0032859	activation of Ral GTPase activity	0.00165	4	4	AKT2,RALGAPA2,RALGAPB,RALGAPA1
GO: Biological Process	GO:0090170	regulation of Golgi inheritance	0.00165	4	4	MAP2K1,MAP2K2,MAPK3,MAPK1
GO: Biological Process	GO:0044351	macropinocytosis	0.00165	4	4	MAPKAPK2,DOCK2,PYCARD,MAPKAPK3
GO: Biological Process	GO:0032485	regulation of Ral protein signal transduction	0.00165	4	4	AKT2,RALGAPA2,RALGAPB,RALGAPA1
GO: Biological Process	GO:0032315	regulation of Ral GTPase activity	0.00165	4	4	AKT2,RALGAPA2,RALGAPB,RALGAPA1
GO: Biological Process	GO:0007182	common-partner SMAD protein phosphorylation	0.00165	4	4	SMAD2,PML,TGFBR2,SPTBN1
GO: Biological Process	GO:0032484	Ral protein signal transduction	0.00165	4	4	AKT2,RALGAPA2,RALGAPB,RALGAPA1
GO: Biological Process	GO:0006041	glucosamine metabolic process	0.00165	4	4	GNPDA1,GFPT1,GNPNAT1,PGM3
GO: Biological Process	GO:0010815	bradykinin catabolic process	0.00165	4	4	CTSH,ECE1,IDE,XPNPEP1
GO: Biological Process	GO:0019322	pentose biosynthetic process	0.00165	4	4	G6PD,PGD,TKT,TALDO1
GO: Biological Process	GO:0051050	positive regulation of transport	0.001658	144	571	ABCA1,ABR,ACTN4,ACTN2,ADD1,PARP1,ADRBK1,MTMR2,AGT,AKT1,AK1,AHSG,AKT2,BIN1,ANK2,ANK3,ANXA1,ANXA2,APOE,WASL,ARRB1,ARRB2,ASPH,CLTCL1,BAK1,BAX,C5,CALM3,CALR,CASK,CBL,CAV1,CASP1,CD14,CDH1,CDC42,AOC3,CDK1,C2CD5,CCR1,CNTN1,ACSL5,AKT3,DNM1L,UNC13D,UBR5,MAPK14,TRPV2,DAB2,DBI,RAB9A,DLG1,INPP5K,RAB8B,DPYSL2,DOCK2,EMD,EGFR,ACSL3,FGR,FHL1,AHCYL1,F2,CHP1,TMEM173,FLNA,KIF3A,RBPMS,GNAS,GLUL,MGEA5,NCKAP1L,HCLS1,S…
GO: Biological Process	GO:0046149	pigment catabolic process	0.001659	5	6	AMBP,BLVRB,BLVRA,HMOX2,HMOX1
GO: Biological Process	GO:0006787	porphyrin-containing compound catabolic process	0.001659	5	6	AMBP,BLVRB,BLVRA,HMOX2,HMOX1
GO: Biological Process	GO:0033539	fatty acid beta-oxidation using acyl-CoA dehydrogenase	0.001659	5	6	ACADM,ACADS,ACADL,ACADVL,ETFDH
GO: Biological Process	GO:0034447	very-low-density lipoprotein particle clearance	0.001659	5	6	APOE,APOC3,APOC2,LRPAP1,VLDLR
GO: Biological Process	GO:0050847	progesterone receptor signaling pathway	0.001659	5	6	UBR5,NEDD4,PHB,PGR,SRC
GO: Biological Process	GO:0010746	regulation of plasma membrane long-chain fatty acid transport	0.001659	5	6	AKT1,AKT2,ACSL5,THBS1,ACSL6
GO: Biological Process	GO:0042797	tRNA transcription from RNA polymerase III promoter	0.001659	5	6	GTF3C4,GTF3C5,GTF3C3,GTF3C2,GTF3C1
GO: Biological Process	GO:0042791	5S class rRNA transcription from RNA polymerase III type 1 promoter	0.001659	5	6	GTF3C4,GTF3C5,GTF3C3,GTF3C2,GTF3C1
GO: Biological Process	GO:0033015	tetrapyrrole catabolic process	0.001659	5	6	AMBP,BLVRB,BLVRA,HMOX2,HMOX1
GO: Biological Process	GO:0042167	heme catabolic process	0.001659	5	6	AMBP,BLVRB,BLVRA,HMOX2,HMOX1
GO: Biological Process	GO:0032463	negative regulation of protein homooligomerization	0.001659	5	6	CLU,CRBN,PEX14,PEX5,SRC
GO: Biological Process	GO:0051403	stress-activated MAPK cascade	0.001671	66	233	RIPK1,AGT,AKT1,AKT2,AMBP,SPAG9,CDC42,CDK1,PTPLAD1,CRKL,TAOK3,MAPK14,CRYAB,MAPKAPK2,DAB2,MAP4K4,ARHGEF6,DUSP9,DUSP3,NCOR1,PTK2B,COPS5,MAP4K5,GAB1,TAB1,GSTP1,GPS1,PDCD4,IGBP1,TAOK1,LMNB1,CCM2,MEN1,MAP3K4,MAP3K5,ITCH,PRDX1,NRBP1,PAK1,AIDA,MAP2K1,MAP2K2,MAP2K3,MAPK9,MAP2K6,PKN1,MAPK3,MAPK1,SERPINF2,ZNF622,RAP2A,PYCARD,PTK2,DAB2IP,MAP2K4,RPS6KA1,RPS6KA2,RPS6KA3,RPS27A,TNXB,TF,STK3,SYK,MAPKAPK3,MAPK8IP…
GO: Biological Process	GO:0032786	positive regulation of DNA-dependent transcription, elongation	0.001674	10	19	DAB2,CTR9,CDC73,WDR61,SUPT16H,MAP2K1,PAF1,TCEB1,SUPT5H,BRD4
GO: Biological Process	GO:0070059	intrinsic apoptotic signaling pathway in response to endoplasmic reticulum stress	0.001674	10	19	AIFM1,BAK1,BAX,BCL2,UBE2K,ITPR1,ERO1L,DAB2IP,DNAJC10,BAG6
GO: Biological Process	GO:0016572	histone phosphorylation	0.001674	10	19	BAZ1B,RPS6KA4,ATM,CDK2,CDK1,JAK2,PKN1,MAPK3,PRKCA,PRKCB
GO: Biological Process	GO:0032091	negative regulation of protein binding	0.001684	16	38	SPAG9,ARRB2,BAX,CAV1,DAB2,CARM1,IFIT2,IFIT1,EPB41L5,PARK7,LRPAP1,MAPK3,PEX14,GTPBP4,KDM1A,ADNP
GO: Biological Process	GO:0009309	amine biosynthetic process	0.001684	16	38	EIF2B2,EIF2B4,BHMT,EIF2B1,GOT1,APIP,MTHFD1,MTHFR,MTAP,MTR,PAOX,SMS,SLC1A3,ADI1,SRM,MRI1
GO: Biological Process	GO:0018904	ether metabolic process	0.001691	11	22	TXN2,GNPAT,AGPS,PDIA6,TXNL1,PDIA5,PDIA3,TXNDC5,P4HB,TMX3,DNAJC10
GO: Biological Process	GO:0034614	cellular response to reactive oxygen species	0.001725	28	81	ANXA1,APOA4,APEX1,RHOB,PRDX5,CAT,AKR1C3,CDK2,CDK1,HDAC6,CRYGD,PRDX6,DPEP1,PRDX3,FER,GPX1,FBLN5,PARK7,MPO,MAP3K5,PRDX1,PRKAA1,AGAP3,SOD3,SOD1,PRDX2,TXNRD1,TPM1
GO: Biological Process	GO:0001933	negative regulation of protein phosphorylation	0.001774	63	221	ADAR,AKT1,APOE,ARRB1,BAK1,BAX,CAV1,CDKN1B,TAOK3,INPP5K,DUSP9,DUSP3,PPM1F,CHP1,GNB2L1,GNAQ,GMFB,SNX6,GSTP1,GPS1,PDCD4,HSPA4,KNG1,INPPL1,STK38,ILK,LYN,SMAD3,CHORDC1,WNK1,MEN1,MLLT1,PEBP1,PAK2,MICAL1,DEPTOR,AIDA,NF1,NF2,DNAJC3,PRKAR1A,PRKCA,PPP2CA,PPP2R1A,ENPP1,PDPK1,TRIM27,PYCARD,PTPN6,PTPRC,DAB2IP,DNAJC10,FAM129A,THY1,PID1,TNFAIP3,NR2F2,TAF7,YWHAG,UCHL1,TSC2,UBASH3B,AKT1S1
GO: Biological Process	GO:0050818	regulation of coagulation	0.00178	25	70	ANXA5,ANXA2,APOE,SERPING1,CAV1,CPB2,F12,F2,HRG,KNG1,KLKB1,LYN,PROC,PRKG1,PRKCA,PDGFRA,SERPINF2,ANO6,PLEK,PLG,SERPINE2,THBS1,PRDX2,SYK,UBASH3B
GO: Biological Process	GO:0000723	telomere maintenance	0.00178	25	70	FBXO4,PARP1,ATM,POT1,RAD50,DKC1,FEN1,ERCC4,CTC1,XRCC6,PTGES3,MRE11A,PCNA,NBN,POLD1,PRKDC,PML,RFC2,RFC5,RFC4,YLPM1,XRN1,TERF2IP,TEP1,TNKS1BP1
GO: Biological Process	GO:0009250	glucan biosynthetic process	0.00179	18	45	ACADM,AGL,AKT1,AKT2,INPP5K,MTOR,GFPT1,GBE1,GYS1,GYG1,PTGES3,SORBS1,PPP1CA,PGM5,PGM1,ENPP1,PGM2,UGP2
GO: Biological Process	GO:0016236	macroautophagy	0.00179	18	45	SQSTM1,TECPR1,WIPI2,HDAC6,CTSD,ATG9A,ATG5,MTOR,ATG7,NPC1,PAFAH1B2,PIK3C3,ATG3,WDR45B,SUPT5H,ATG4C,LARP1,ATG4B
GO: Biological Process	GO:0005978	glycogen biosynthetic process	0.00179	18	45	ACADM,AGL,AKT1,AKT2,INPP5K,MTOR,GFPT1,GBE1,GYS1,GYG1,PTGES3,SORBS1,PPP1CA,PGM5,PGM1,ENPP1,PGM2,UGP2
GO: Biological Process	GO:0007159	leukocyte cell-cell adhesion	0.00179	18	45	APOA4,CD44,CERCAM,GSTP1,ICAM1,ITGB2,ITGAL,ITGA5,FERMT3,MSN,ROCK1,PTPRC,S100A9,S100A8,STK10,SYK,EZR,TSTA3
GO: Biological Process	GO:0045834	positive regulation of lipid metabolic process	0.001818	35	108	AGT,AKT1,AKT2,ANXA1,APOA4,APOA2,APOE,APOC2,CDC42,CD81,ACSL5,CPT1A,DBI,CYP17A1,PTK2B,ACSL3,FDPS,FGR,MTOR,VAV3,ABHD5,SORBS1,LYN,POR,MAPK9,PRKAA1,PDGFRB,PDGFRA,PTK2,RAC1,SCP2,SRC,NR1H2,ACSL6,MLYCD
GO: Biological Process	GO:0006040	amino sugar metabolic process	0.001886	15	35	GNPDA2,CHI3L1,CHIT1,GNPDA1,CTBS,GFPT1,MGEA5,HEXB,NPL,GNPNAT1,CHID1,PGM3,NAGK,RENBP,CMAS
GO: Biological Process	GO:0080135	regulation of cellular response to stress	0.001889	83	306	RIPK1,AKT1,AKT2,AMBP,SPAG9,APEX1,ATM,BAK1,BAX,STK24,PNPT1,CDK6,CDC42,CD74,CD44,BCLAF1,PTPLAD1,CDK9,BRCC3,TAOK3,TRIM28,UBR5,DDX5,DAB2,TRIP12,MAP4K4,NUDT16,DUSP3,BRE,NCOR1,EGFR,PTK2B,COPS5,FECH,MTOR,MAP4K5,GAB1,GSTP1,H2AFX,FBLN5,ATG7,PDCD4,IGBP1,LYN,TAOK1,LMNB1,MEN1,MAP3K4,MAP3K5,MIF,MGMT,ITCH,NPC1,PRDX1,PAFAH1B2,PAK1,AIDA,RTN4,MAP2K1,MAP2K2,MAPK9,PKN1,MAPK3,MAPK1,PPP4C,SERPINF2,ZNF622,RAP2A,PYCARD…
GO: Biological Process	GO:0070201	regulation of establishment of protein localization	0.001899	93	349	PARP1,GAPVD1,AKT1,ANK3,ANXA1,APOA2,ARF6,RHOG,ASPH,PICALM,FZD1,C5,CASP1,CD14,CDH1,CDC42,CDK1,NEDD1,G3BP2,SUFU,DNM1L,UBR5,MAPK14,CSK,NOLC1,DAB2,CYLD,DLG1,INPP5K,ATG5,EMD,EGFR,ACSL3,FGR,CHP1,MTOR,TMEM173,FLNA,FAF1,RBPMS,TACC3,LYPLA1,GNB2L1,GNAQ,SH3GLB1,HCLS1,SORBS1,CHERP,ARFIP1,HSP90AB1,LYPLAL1,KIF5B,JUP,JAK2,EPB41L5,IRF3,LYN,SMAD3,SMAD4,LRP1,MAVS,LCP1,RAB8A,MIF,PRDX1,GOPC,NF1,MED1,PRKACA,XPO4,NLRP2…
GO: Biological Process	GO:0032940	secretion by cell	0.00191	189	775	A2M,VPS33B,ARFGAP3,ABCA1,IQGAP1,ABR,NAPA,SNAP23,ACTN1,ACTN4,ACTN2,ADRBK1,AP2B1,AGT,ALB,ALDOA,ANXA3,SLC25A4,SLC25A5,SLC25A6,ANXA1,APOA2,ARRB1,BTK,SERPING1,C5,CANX,CAMK2G,CALU,CALM3,CASP1,SPCS3,CD14,CD9,DGAT1,CHI3L1,GNPTAB,SCRN1,RAB14,CCR1,CLU,WDR1,CPT1A,GNPDA1,DNM1L,UNC13D,RAB9A,CFD,RAB8B,ATG5,RAB3D,DPYSL2,EXOC8,TMED10,ERP29,FGR,FGG,FGB,FGA,FES,TRPV4,F13A1,CHP1,NISCH,FLNA,FN1,MIA3,GLS,SERPINA10,CA…
GO: Biological Process	GO:0002221	pattern recognition receptor signaling pathway	0.001958	42	136	RIPK1,ARF6,ARRB2,BTK,C1QBP,LSM14A,CASP8,CD14,CDK1,MAPK14,MAPKAPK2,CYLD,DUSP3,TAB1,IRF3,LYN,MAVS,ZC3HAV1,ITCH,NFKB2,NFKB1,MAP2K1,MAP2K2,MAP2K3,MAPK9,MAP2K6,MAPK3,MAPK1,DDX60,PDPK1,RELA,TBK1,MAP2K4,DDX58,RPS6KA1,RPS6KA2,RPS6KA3,RPS27A,TLR2,TNFAIP3,MAPKAPK3,PGLYRP2
GO: Biological Process	GO:0000165	MAPK cascade	0.001992	145	578	RIPK1,AGT,AKT1,AKT2,AMBP,SPAG9,DOK2,APOE,ARAF,ARRB1,ARRB2,C5,CAMK2D,CAV1,LAMTOR3,PRKD2,CDC42,CDK1,CD81,CD74,CD44,CHI3L1,PTPLAD1,CCR1,CRKL,CRK,TAOK3,SORBS3,CTNNB1,ATP6AP2,CTSH,MAPK14,CRYAB,CSPG4,CSK,LRRK2,MAPKAPK2,DAB2,DAG1,SLC9A3R1,MAP4K4,ARHGEF6,INPP5K,DUSP9,DUSP3,NCOR1,EGFR,PTK2B,COPS5,ERBB2,PDCD10,MAP4K5,GAB1,TAB1,GNAI2,GSTP1,CAMKK2,GPS1,GRB2,RAPGEF1,PDCD4,IGBP1,IGHM,KNG1,JAK2,ITGAV,ITGA1,INPP…
GO: Biological Process	GO:0009628	response to abiotic stimulus	0.002044	211	876	ACADM,CRADD,ACTN4,FAM162A,ADA,NOC2L,MBD4,ADSL,AGT,AKT1,AIF1,EIF2B2,EIF2B5,EIF2B4,EIF2B3,AKT2,ALDOC,ALOX5,ANXA7,MYOF,ANXA1,LIMD1,ARSA,ARSB,ARRB1,ARRB2,RHOB,ATP1A3,ATP1A1,ATP1A2,ATM,PDLIM1,UNC119,ATP1B1,BAK1,BAX,TXN2,NIPBL,SMC1A,BCL2,CA2,COPS3,CAMK2D,CAMK2G,CAPN2,KMO,CUL2,CAV1,CASP1,CASP7,CASP8,CAT,CD14,CD9,INTS7,CDK2,RIC8A,CHI3L1,BRCC3,COL1A1,CIRBP,CPB2,CREBBP,SLC12A6,COL3A1,CTSB,MAPK14,TRPV2,CRYA…
GO: Biological Process	GO:0036109	alpha-linolenic acid metabolic process	0.002058	7	11	ACAA1,ACOX1,ABCD1,ACSL1,HSD17B4,FADS1,SCP2
GO: Biological Process	GO:0032456	endocytic recycling	0.002058	7	11	SNX4,RAB14,EHD1,EPS15,EHD4,EHD3,EHD2
GO: Biological Process	GO:0046501	protoporphyrinogen IX metabolic process	0.002058	7	11	ALAD,CPOX,FECH,HMBS,IREB2,PPOX,UROD
GO: Biological Process	GO:0042921	glucocorticoid receptor signaling pathway	0.002058	7	11	ARID1A,CALR,RBM14,PTGES3,NEDD4,PHB,YWHAH
GO: Biological Process	GO:0031098	stress-activated protein kinase signaling cascade	0.002059	67	239	RIPK1,AGT,AKT1,AKT2,AMBP,SPAG9,CDC42,CDK1,PTPLAD1,CRKL,TAOK3,MAPK14,CRYAB,MAPKAPK2,DAB2,MAP4K4,ARHGEF6,DUSP9,DUSP3,NCOR1,PTK2B,COPS5,MAP4K5,GAB1,TAB1,GSTP1,GPS1,PDCD4,IGBP1,LYN,TAOK1,LMNB1,CCM2,MEN1,MAP3K4,MAP3K5,ITCH,PRDX1,NRBP1,PAK1,AIDA,MAP2K1,MAP2K2,MAP2K3,MAPK9,MAP2K6,PKN1,MAPK3,MAPK1,SERPINF2,ZNF622,RAP2A,PYCARD,PTK2,DAB2IP,MAP2K4,RPS6KA1,RPS6KA2,RPS6KA3,RPS27A,TNXB,TF,STK3,SYK,MAPKAPK3,MAP…
GO: Biological Process	GO:0007018	microtubule-based movement	0.002067	54	185	AK7,AP3D1,ARL3,DST,AP3B1,OFD1,CDC42,HDAC6,LRPPRC,DYNC1H1,DYNC1I2,KIF3B,TTC21B,TUBAL3,RHOT2,KIF3A,DYNC1LI1,TUBA1B,TUBB4B,TUBB3,HTT,IGBP1,KLC1,KIF2A,KIF5A,KIF5B,AP3M1,KTN1,DYNLRB1,TUBB2B,MAP1B,MAP4,MAPT,OPA1,NME7,MAP2K1,KIF16B,PEX14,ACTR10,KIF13A,RAB6A,SOD1,RHOT1,MAP1S,SPG7,COPG1,TUBB6,KIFAP3,UCHL1,TUBB2A,TUBA4A,KIF13B,AP3B2,KIF1B
GO: Biological Process	GO:0032011	ARF protein signal transduction	0.002077	19	49	ARFGAP3,GBF1,ACAP1,GIT2,IQSEC1,CYTH1,ADAP1,ARFGEF2,ARFGEF1,ASAP1,AGFG1,SMAP2,MYO9B,ARFGAP1,GIT1,ARAP1,AGAP3,ACAP2,ARFGAP2
GO: Biological Process	GO:0006488	dolichol-linked oligosaccharide biosynthetic process	0.002095	14	32	DPM1,ALG12,ALG3,ALG9,MPDU1,GFPT1,MPI,ALG5,GMPPB,GMPPA,GNPNAT1,PGM3,PMM2,ALG2
GO: Biological Process	GO:0043405	regulation of MAP kinase activity	0.002109	75	273	RIPK1,SPAG9,APOE,ARRB1,C5,CAV1,CDK1,CD81,CD74,PTPLAD1,CCR1,TAOK3,MAPK14,CSPG4,CSK,LRRK2,MAPKAPK2,DAB2,INPP5K,DUSP9,DUSP3,EGFR,PTK2B,ERBB2,PDCD10,MAP4K5,GAB1,TAB1,GSTP1,GPS1,PDCD4,IGHM,KNG1,ITGA1,INPPL1,STK38,ILK,LYN,KRAS,MAP3K4,MAP3K5,MIF,PAK1,AIDA,NF1,MAP2K1,MAP2K2,MAP2K3,MAP2K6,PKN1,MAPK3,MAPK1,PRKCA,PRKAA1,PPP2CA,PPP2R1A,PDGFRB,PTPN11,PTPN6,PTPRC,DAB2IP,SOD1,MAP2K4,SHC1,RPS27A,THBS1,TNXB,PRDX2…
GO: Biological Process	GO:0019725	cellular homeostasis	0.002136	206	854	ABCB7,ACO1,ACTN2,ADD1,AP3D1,MTMR2,AGT,AKT1,EIF2B2,EIF2B5,EIF2B4,AKT2,ALDOA,ANK2,ANXA7,ANK3,APOE,APEX1,ARRB1,ASPH,ATP1A1,ATP1A2,AIFM1,ATP6V0D1,RGN,ATP2A2,ATP6V1B1,ATP6V1B2,ATP6V0C,ATP6V0A1,ATP6V1E1,ATP6V1C1,BAK1,BAX,TXN2,BCL2,GNPAT,CA2,C7,C5,CAMK2D,CALM3,CALR,CACNB3,ATRN,CAV1,CD9,SIN3A,CLIC4,C11orf31,CCR1,FIG4,ATP6V1H,CKB,CLIC1,GLRX5,CP,ABCB6,CTNNB1,ATP6V1D,PDIA6,VAPB,LRRK2,DAG1,DBI,TXNL1,SLC9A3R1…
GO: Biological Process	GO:0032388	positive regulation of intracellular transport	0.002168	35	109	PARP1,MTMR2,ANK3,ASPH,CDH1,CDC42,CDK1,UBR5,MAPK14,DAB2,EMD,EGFR,ACSL3,CHP1,TMEM173,FLNA,RBPMS,HCLS1,CHERP,HSP90AB1,JUP,JAK2,SMAD3,SMAD4,MAVS,NEDD4,MED1,PRKACA,XPO4,DDX58,SCP2,TLR2,UACA,TRIP6,KANK1
GO: Biological Process	GO:0048678	response to axon injury	0.002235	22	60	AIF1,APOE,BAX,TXN2,BCL2,STK24,CDK1,CTNNA1,VCAN,DPYSL3,ERBB2,TNC,JAK2,LYN,LGALS1,LAMB2,MAP1B,MIF,MMP2,RTN4,MAP2K1,SOD1
GO: Biological Process	GO:0046488	phosphatidylinositol metabolic process	0.002273	44	145	DPM1,MTMR1,MTMR2,ATM,MTMR6,PIP5K1A,PLA2G4C,CD81,IP6K1,FIG4,PIGT,PIGK,ALG12,ALG9,INPP5K,PLBD1,BPNT1,CDIPT,SLC27A1,INPPL1,INPP5B,INPP5A,INPP4A,INPP1,IMPA1,MTM1,OCRL,PDGFRB,VAC14,PLEK,PLCG2,PIK3C2A,PIK3CA,PIK3C3,PIK3R1,PI4KA,PIP4K2A,MTMR14,PIGN,IMPAD1,PIGS,SACM1L,PLCB1,PIK3R4
GO: Biological Process	GO:0002758	innate immune response-activating signal transduction	0.002279	43	141	RIPK1,ARF6,ARRB2,BTK,C1QBP,LSM14A,CASP8,CD14,CDK1,MAPK14,MAPKAPK2,CYLD,DUSP3,TAB1,HCK,IRF3,LYN,MAVS,ZC3HAV1,ITCH,NFKB2,NFKB1,MAP2K1,MAP2K2,MAP2K3,MAPK9,MAP2K6,MAPK3,MAPK1,DDX60,PDPK1,RELA,TBK1,MAP2K4,DDX58,RPS6KA1,RPS6KA2,RPS6KA3,RPS27A,TLR2,TNFAIP3,MAPKAPK3,PGLYRP2
GO: Biological Process	GO:2000146	negative regulation of cell motility	0.002279	43	141	ABR,ADA,AIF1,APOE,APEX1,ARHGAP4,BCL2,STK24,C5,CLIC4,CSNK2B,DAG1,SLC9A3R1,MMRN2,DPYSL3,DPEP1,NISCH,MIA3,HRG,HMOX1,RAP2C,ILK,LRP1,ABHD6,NF1,NF2,PIN1,RAP2B,RAP2A,PTK2,RNF20,DAB2IP,GTPBP4,RRAS,TGFBR3,THY1,THBS1,NR2F2,VCL,TPM1,SRGAP2,KANK1,PLCB1
GO: Biological Process	GO:0034142	toll-like receptor 4 signaling pathway	0.0023	30	90	RIPK1,ARF6,BTK,CD14,CDK1,MAPK14,MAPKAPK2,DUSP3,TAB1,IRF3,LYN,NFKB2,NFKB1,MAP2K1,MAP2K2,MAP2K3,MAPK9,MAP2K6,MAPK3,MAPK1,RELA,TBK1,MAP2K4,RPS6KA1,RPS6KA2,RPS6KA3,RPS27A,TLR2,TNFAIP3,MAPKAPK3
GO: Biological Process	GO:0071230	cellular response to amino acid stimulus	0.002327	16	39	LAMTOR3,CDH1,COL1A1,COL5A2,COL6A1,COL4A6,COL4A1,COL3A1,DNMT1,DNMT3A,MMP2,UBR1,RRAGC,PDGFRA,LAMTOR2,LAMTOR1
GO: Biological Process	GO:0060341	regulation of cellular localization	0.002341	175	715	IQGAP1,ABR,NAPA,SNAP23,ACTN2,PARP1,ADRBK1,MTMR2,AGT,AKT1,ANK2,ANK3,SLC25A4,SLC25A5,SLC25A6,ANXA1,APOA2,ARF6,ARRB1,RHOG,ASPH,FZD1,C5,CAMK2D,CALM3,CASP1,SPCS3,CD14,SIN3A,CDH1,CDC42,CDK1,G3BP2,SUFU,CPT1A,DNM1L,UNC13D,CTNNB1,UBR5,MAPK14,CRYAB,CSK,NOLC1,DAB2,CYLD,RAB9A,DLG1,INPP5K,RAB8B,ATG5,RAB3D,DPYSL2,EMD,EGFR,ACSL3,FGR,FES,CHP1,MTOR,TMEM173,FLNA,FAF1,RBPMS,TACC3,LYPLA1,SERPINA10,GNB2L1,GNAQ,GNAS,S…
GO: Biological Process	GO:0010959	regulation of metal ion transport	0.002342	61	215	ACTN4,ACTN2,AGT,AKT1,AKT2,ANK2,ANK3,ARRB2,ASPH,ATP1A1,BAK1,BAX,BCL2,CAMK2D,CAMK2G,CALM3,CASK,CAV1,CCR1,CNTN1,AKT3,CTNNB1,TRPV2,DBI,SLC9A3R1,DIAPH1,DLG1,INPP5K,PTK2B,FHL1,AHCYL1,F2,CHP1,GNAQ,GNAS,GNAI2,MGEA5,ICAM1,KIF5B,SPTBN4,ITPR1,STIM2,LYN,MIF,MYH9,MYLK,MYO5A,NEDD4,PDGFRB,PML,PLCG1,PLCG2,SERPINE2,TRIM27,THY1,STIM1,YWHAH,WFS1,UBASH3B,NEDD4L,PLCB1
GO: Biological Process	GO:0048259	regulation of receptor-mediated endocytosis	0.00235	20	53	MTMR2,APOC3,APOC2,WASL,ARF6,ARRB2,PICALM,CBL,DAB2,KIF3A,HNRNPK,HIP1,PRKCA,PPT1,SCYL2,PLD2,RAC1,CD2AP,AAK1,SYNE1
GO: Biological Process	GO:0009967	positive regulation of signal transduction	0.002366	210	874	RIPK1,ADA,TRADD,PARP1,MBD2,AGT,AKT2,SPAG9,ARRB1,ARRB2,ATM,BID,BAK1,BAX,C1QBP,C5,CAMK2D,LSM14A,CBL,CAV1,CASP1,CASP8,CAT,LAMTOR3,PRKD2,AKR1C3,CDC42,CDK1,CD81,CD74,CD44,BCLAF1,CHI3L1,USP34,PTPLAD1,CCR1,COL1A1,CLU,HDAC6,DNM1L,CTNNA1,TAOK3,SORBS3,CTNNB1,CRLF3,UBR5,MAPK14,CSNK2B,CSPG4,CSK,LRRK2,DDX5,DAPK3,MAPKAPK2,DAB2,CYLD,ECE1,ECM1,AKAP12,DOCK2,CDC73,EGFR,PTK2B,FGR,MPP7,MALT1,ERBB2,F2,PDCD10,MTOR,MAP…
GO: Biological Process	GO:0032606	type I interferon production	0.002366	26	75	RIPK1,UBE2L6,DDX3X,NLRX1,CYLD,ATG5,TMEM173,POLR3A,TRIM56,IRF3,MAVS,ZC3HAV1,ITCH,PCBP2,NFKB2,NFKB1,PIN1,RELA,TBK1,PYCARD,DDX58,RPS27A,TLR2,TNFAIP3,UBA7,TRIM25
GO: Biological Process	GO:2000117	negative regulation of cysteine-type endopeptidase activity	0.002366	26	75	AKT1,AKT2,ARRB1,PRDX5,CD44,DNAJB6,CRYAB,DDX3X,DPEP1,PRDX3,HTT,GPX1,GPI,IGBP1,IFI16,PAK2,MICAL1,POR,PCID2,SERPINB9,RPS6KA1,RPS6KA3,THBS1,USP47,TNFAIP3,SRC
GO: Biological Process	GO:0010769	regulation of cell morphogenesis involved in differentiation	0.00239	60	211	NRP1,APOE,ARHGAP4,ARHGDIA,ARHGEF1,STK24,C1QBP,CALR,NUMB,CHN1,COL1A1,ARPC2,ACTR3,CTNNB1,TRPV2,LRRK2,DAB2,EPHB3,TRIOBP,WDR36,STK25,GOLGA2,GDI1,PDLIM5,EPB41L5,ILK,CAPRIN1,SMAD2,SMAD3,SMAD4,MAP1B,MAPT,MIF,RTN4,NEDD4,MAPK9,PPP2CA,PLXNA3,RAP2A,ROBO2,PTK2,PTPRD,PTPRF,DAB2IP,SSH1,PLXNB2,TGFBR3,TGFB1I1,THY1,SSH3,STAT1,RUFY3,YWHAH,VIM,KIF13B,SYNE1,ADNP,SPG20,KANK1,POFUT2
GO: Biological Process	GO:0043299	leukocyte degranulation	0.002394	18	46	ABR,ANXA3,BTK,UNC13D,FGR,FES,HCK,HMOX1,LYN,MYO1F,PDPK1,PLD2,RAB27A,STXBP2,STXBP3,SYK,YWHAZ,LAT2
GO: Biological Process	GO:0002252	immune effector process	0.002445	132	523	A2M,ABR,ADAR,ADA,AP1M1,AP1S2,AP2B1,AP1B1,AP2A2,AP2A1,AP1G1,ANXA3,APOA2,ARRB2,BCL2,BTK,C1R,C1QC,C2,C1QBP,SERPING1,C6,C7,C8A,C8B,C8G,C9,C4BPA,C5,LSM14A,SAMHD1,SIN3A,CD74,CD59,ELMO1,CTSC,ATP6V1H,AP2M1,CLU,UNC13D,CTSH,DDX41,DLG1,CFD,ATG5,DPP4,DOCK2,PTK2B,FGR,FER,FES,MALT1,IGKV1-5,TMEM173,POLR3A,GNL1,TUBB4B,TRIM22,GBP1,MSH6,MASP2,HCK,HPX,HMOX1,APOBEC3C,IGHM,IFIT3,IFIT2,IFIT1,IFI16,ICAM1,TRIM56,ITGAL,I…
GO: Biological Process	GO:0030010	establishment of cell polarity	0.002489	27	79	ARF6,ARHGEF2,ZW10,ARHGEF11,CYTH1,ROCK2,DOCK2,PTK2B,MPP7,GNB2L1,HTT,ARFGEF1,LMNA,MAP1B,MAP4,NUMA1,MYH9,MYO9B,RAP1B,ROCK1,PTK7,PTK2,FBF1,DOCK7,CLASP1,SCRIB,KANK1
GO: Biological Process	GO:0000289	nuclear-transcribed mRNA poly(A) tail shortening	0.002497	12	26	CNOT10,EIF4A3,EIF4B,EIF4G1,PAIP1,PABPC1,MLH1,CNOT7,CNOT3,CNOT2,TNKS1BP1,CNOT1
GO: Biological Process	GO:0014002	astrocyte development	0.002519	8	14	AGT,EIF2B5,CDK6,EGFR,LAMC3,LAMB2,NF1,VIM
GO: Biological Process	GO:0048025	negative regulation of mRNA splicing, via spliceosome	0.002519	8	14	C1QBP,SRSF9,HNRNPA2B1,U2AF2,PTBP1,SFSWAP,SRSF7,SRSF4
GO: Biological Process	GO:0035458	cellular response to interferon-beta	0.002519	8	14	PNPT1,DDX41,TMEM173,GBP1,IFIT3,IFIT1,IFI16,STAT1
GO: Biological Process	GO:0051917	regulation of fibrinolysis	0.002519	8	14	CPB2,F12,F2,HRG,KLKB1,SERPINF2,PLG,THBS1
GO: Biological Process	GO:0006607	NLS-bearing substrate import into nucleus	0.002519	8	14	NCKIPSD,DAG1,KPNA3,KPNA1,KPNB1,IPO5,KPNA4,KPNA6
GO: Biological Process	GO:0043173	nucleotide salvage	0.002519	8	14	ADA,ADK,AMPD3,AMPD2,APRT,HPRT1,UPP1,NAPRT1
GO: Biological Process	GO:0046903	secretion	0.002566	211	880	A2M,VPS33B,ARFGAP3,ABCA1,IQGAP1,ABR,NAPA,SNAP23,ACTN1,ACTN4,ACTN2,ADA,ADRBK1,AP2B1,AGT,ALB,ALDOA,ANXA3,ANPEP,SLC25A4,SLC25A5,SLC25A6,ANXA1,ANXA2,APOA2,APRT,ARRB1,BCAT2,BTK,CA2,SERPING1,C5,CANX,CAMK2G,CALU,CALM3,CAV1,CASP1,SPCS3,CD14,CD9,DGAT1,CD74,CHI3L1,GNPTAB,SCRN1,RAB14,CCR1,CLU,WDR1,CPT1A,GNPDA1,DNM1L,COPA,UNC13D,RAB9A,SLC9A3R1,CFD,RAB8B,ATG5,RAB3D,DPYSL2,EXOC8,ACSL3,ACSL4,TMED10,ERP29,FGR,FG…
GO: Biological Process	GO:0010741	negative regulation of intracellular protein kinase cascade	0.00257	47	158	AKT1,AMBP,APOE,HGS,CAV1,CASP8,G3BP2,TAOK3,CSK,DAB2,DAG1,SLC9A3R1,INPP5K,DUSP9,DUSP3,NCOR1,FAF1,GNB2L1,GSTP1,GPS1,PDCD4,IGBP1,KNG1,INPPL1,STK38,LYN,NDRG2,MEN1,LEMD2,ITCH,OTUD7B,PEBP1,AIDA,NF1,NF2,PRKCA,PPP2CA,PPP2R1A,PIN1,PYCARD,PTPN6,DAB2IP,TNFAIP3,STAT1,UCHL1,TSC2,TRIP6
GO: Biological Process	GO:0009410	response to xenobiotic stimulus	0.002593	46	154	NAT1,ADH1B,ADH7,ALDH1A1,PAPSS2,PAPSS1,AIP,CYP2U1,COMT,GGCT,CRYZ,CYP11A1,CYP27A1,CYP17A1,CYP1B1,NQO1,CYP7B1,ACSL1,EPHX2,FMO4,GCLC,BPNT1,GSTP1,GSTM4,GSTM1,GPX1,GSS,GSTA4,SULT1C4,MAT2B,NCEH1,MTR,MAOB,MAT2A,MGST2,MGST3,MGST1,CNDP2,ACSS2,PAOX,PTGS1,PTGIS,TBXAS1,ACSS1,UGP2,UGDH
GO: Biological Process	GO:2000243	positive regulation of reproductive process	0.002604	36	114	ADAR,ALB,C1QBP,CASP1,NELFB,NELFCD,CDK9,CTNNB1,VAPB,RSF1,SUPT16H,NR5A1,GTF2F2,IFIT1,ZP4,MNAT1,NCBP1,POLR2C,POLR2E,POLR2G,POLR2H,POLR2A,POLR2B,PFN1,PDE3A,RAD23A,SMARCB1,SMARCA4,TOP2A,TCEB1,SUPT5H,SSRP1,SRPK2,NELFA,NELFE,PLCB1
GO: Biological Process	GO:0019079	viral genome replication	0.002604	21	57	ADAR,BCL2,CTBP2,CTBP1,VAPB,DDX5,INPP5K,HTATSF1,IFIT1,IFI16,MAVS,MX1,ZC3HAV1,OAS1,NFIA,RAD23A,SMARCB1,TOP2A,SUPT5H,SRPK2,UBP1
GO: Biological Process	GO:0000186	activation of MAPKK activity	0.002604	21	57	ARAF,LAMTOR3,CDK1,CRK,LRRK2,EGFR,GNAI2,RAPGEF1,JAK2,KIDINS220,KRAS,MAP3K4,MAP3K5,MAP2K1,MAP2K2,MAPK3,MAPK1,PLCG1,RAP1A,LAMTOR2,YWHAB
GO: Biological Process	GO:0006805	xenobiotic metabolic process	0.002613	45	150	NAT1,ADH1B,ADH7,ALDH1A1,PAPSS2,PAPSS1,AIP,CYP2U1,COMT,GGCT,CRYZ,CYP11A1,CYP27A1,CYP17A1,CYP1B1,NQO1,CYP7B1,ACSL1,EPHX2,FMO4,GCLC,BPNT1,GSTP1,GSTM4,GSTM1,GSS,GSTA4,SULT1C4,MAT2B,NCEH1,MTR,MAOB,MAT2A,MGST2,MGST3,MGST1,CNDP2,ACSS2,PAOX,PTGS1,PTGIS,TBXAS1,ACSS1,UGP2,UGDH
GO: Biological Process	GO:0009262	deoxyribonucleotide metabolic process	0.002637	15	36	ADA,MBD4,ADK,AK2,DGUOK,NUDT16,DUT,NUDT18,DERA,GUK1,MGEA5,AK3,SMUG1,RRM1,NT5C
GO: Biological Process	GO:0030520	intracellular estrogen receptor signaling pathway	0.002637	15	36	ARID1A,KANK2,DDX54,DDX5,CYP7B1,RBM14,CARM1,DDX17,STRN3,PAK1,MED1,SAFB,TAF7,SRC,MLL2
GO: Biological Process	GO:0046165	alcohol biosynthetic process	0.002653	42	138	APOB,APOA2,APOE,AKR1C3,ISYNA1,IP6K1,CYB5R1,CYP11A1,CYB5R3,GGPS1,PCYT1B,SPTLC2,PTK2B,ACSL3,FDPS,FABP5,G6PD,LPCAT1,ACAA2,GOT1,SIGMAR1,NSDHL,HSD17B1,IDI1,SLC27A1,IMPA1,LSS,LBR,SLC44A2,NFKB1,POR,PRKAA1,PCYT1A,PLCD1,PLCG1,PLEK,PLCG2,SOD1,SCP2,IMPAD1,SLC44A1,LPIN1
GO: Biological Process	GO:0030336	negative regulation of cell migration	0.002653	42	138	ABR,ADA,AIF1,APOE,APEX1,ARHGAP4,BCL2,STK24,C5,CLIC4,CSNK2B,DAG1,SLC9A3R1,MMRN2,DPYSL3,DPEP1,NISCH,MIA3,HRG,HMOX1,RAP2C,ILK,LRP1,ABHD6,NF1,NF2,RAP2B,RAP2A,PTK2,RNF20,DAB2IP,GTPBP4,RRAS,TGFBR3,THY1,THBS1,NR2F2,VCL,TPM1,SRGAP2,KANK1,PLCB1
GO: Biological Process	GO:0006914	autophagy	0.002653	39	126	SQSTM1,USP13,ARSA,ARSB,USP10,BCL2,TECPR1,VPS51,WIPI2,HDAC6,CTSD,CTSB,ATG9A,LRRK2,DAPK3,ATG5,MTOR,FIS1,ATG7,IFI16,PARK7,MAPT,NPC1,PAFAH1B2,MTDH,GOPC,PRKAA1,PIK3C3,ATG3,WDR45B,S100A9,S100A8,RASIP1,TNFAIP3,FNBP1L,SUPT5H,ATG4C,LARP1,ATG4B
GO: Biological Process	GO:0001516	prostaglandin biosynthetic process	0.002656	11	23	ANXA1,CD74,PTGES2,PTGES3,HPGDS,MIF,MAPK9,PTGS1,PTGIS,PTGDS,TBXAS1
GO: Biological Process	GO:0046457	prostanoid biosynthetic process	0.002656	11	23	ANXA1,CD74,PTGES2,PTGES3,HPGDS,MIF,MAPK9,PTGS1,PTGIS,PTGDS,TBXAS1
GO: Biological Process	GO:0032459	regulation of protein oligomerization	0.002656	11	23	BID,BAX,CLU,SNX9,CRBN,GNB2L1,SH3GLB1,IDE,PEX14,PEX5,SRC
GO: Biological Process	GO:0009303	rRNA transcription	0.002656	11	23	POLR1A,GTF3C4,GTF3C5,GTF3C3,NPM3,GTF3C2,GTF3C1,MARS,TOP1,TCOF1,POLR1B
GO: Biological Process	GO:0046390	ribose phosphate biosynthetic process	0.002663	70	254	ABCA1,ACACA,ADCY3,ADK,ADSL,ADSS,ADSSL1,AK2,AK1,ALDOA,GMPS,AMPD3,PAPSS2,PAPSS1,AMPD2,APOE,APRT,ATP1A3,ATP1A1,ATP1A2,ATIC,ATP5C1,ATP5A1,ATP2B4,ATP2A3,ATP2A2,ATP2B1,ATP1B1,ATP5J,PPCDC,SLC25A13,CTPS1,AKAP12,DPYD,PTK2B,COASY,G6PD,CAP2,CAP1,GNAS,GNAI2,GNAI3,GART,GBAS,GUK1,GUCY1B3,ATP5L,AK3,PAICS,HPRT1,IMPDH2,IMPDH1,CTPS2,NME7,NF1,NME2,NME3,PPAT,PRPS1,PRKCA,PFAS,RP2,PRPS2,PYGL,PID1,TKT,PANK4,UPP1,UMPS,A…
GO: Biological Process	GO:0043691	reverse cholesterol transport	0.002723	9	17	ABCA1,APOA4,APOA2,APOE,APOC3,APOC2,CETP,CLU,APOM
GO: Biological Process	GO:0046949	fatty-acyl-CoA biosynthetic process	0.002747	10	20	ACACA,ACSL5,DBT,FASN,ACSL3,ACSL1,ACSL4,GCDH,SLC25A1,ACSL6
GO: Biological Process	GO:0075733	intracellular transport of viral material	0.002747	10	20	THOC5,THOC6,THOC1,ALYREF,NMT2,VPS28,THOC2,RPS27A,TSG101,DDX39B
GO: Biological Process	GO:0045089	positive regulation of innate immune response	0.002757	52	179	RIPK1,ARF6,ARRB2,BTK,C1QBP,LSM14A,CASP8,CD14,SIN3A,CDK1,CD74,MAPK14,MAPKAPK2,CYLD,DUSP3,TMEM173,TAB1,HCK,IFI16,IRF3,LYN,MAVS,ZC3HAV1,ITCH,NFKB2,NFKB1,MAP2K1,MAP2K2,MAP2K3,MAPK9,MAP2K6,MAPK3,MAPK1,DDX60,PDPK1,RELA,TBK1,PYCARD,PVRL2,MAP2K4,DDX58,RPS6KA1,RPS6KA2,RPS6KA3,CADM1,RPS27A,TLR2,TNFAIP3,TRIM5,STAT5A,MAPKAPK3,PGLYRP2
GO: Biological Process	GO:0034134	toll-like receptor 2 signaling pathway	0.002772	25	72	BTK,CDK1,MAPK14,MAPKAPK2,DUSP3,TAB1,LYN,NFKB2,NFKB1,MAP2K1,MAP2K2,MAP2K3,MAPK9,MAP2K6,MAPK3,MAPK1,RELA,MAP2K4,RPS6KA1,RPS6KA2,RPS6KA3,RPS27A,TLR2,TNFAIP3,MAPKAPK3
GO: Biological Process	GO:0090288	negative regulation of cellular response to growth factor stimulus	0.002781	30	91	CASK,USP15,UCHL5,MMRN2,FBN1,STRAP,GLG1,STUB1,SNX6,GPC1,HRG,HSPA5,SMAD2,SMAD3,LTBP1,NEDD4,PPP1CC,PPP1CA,PPM1A,PDPK1,PIN1,LEMD3,RPS27A,TGFBR2,TGFBR3,TGFB1I1,THBS1,ASPN,XPO1,NEDD4L
GO: Biological Process	GO:0097202	activation of cysteine-type endopeptidase activity	0.002781	30	91	RIPK1,FAM162A,TRADD,APAF1,AIFM1,BAK1,BAX,C6,C9,CASP1,CASP7,CASP8,CDKN1B,PDCD6,GNB2L1,RPS27L,HIP1,IFI16,JAK2,SMAD3,MAP3K5,MAPK9,PML,PYCARD,S100A9,S100A8,MTCH1,RPS3,IFT57,VCP
GO: Biological Process	GO:0001952	regulation of cell-matrix adhesion	0.00284	22	61	ARHGAP6,BCL2,CASK,CDK6,ROCK2,PPM1F,PTK2B,PLEKHA2,HRG,EPB41L5,ILK,SMAD3,MMP14,NF1,NF2,PIK3R1,RASA1,ROCK1,PTK2,THBS1,SRC,UTRN
GO: Biological Process	GO:0006164	purine nucleotide biosynthetic process	0.002871	67	242	ABCA1,ACACA,ADA,ADCY3,ADK,ADSL,ADSS,ADSSL1,AK2,AK1,ALDOA,GMPS,AMPD3,PAPSS2,PAPSS1,AMPD2,APOE,APRT,ATP1A3,ATP1A1,ATP1A2,ATIC,ATP5C1,ATP5A1,ATP2B4,ATP2A3,ATP2A2,ATP2B1,ATP1B1,ATP5J,PPCDC,SLC25A13,AKAP12,PTK2B,COASY,CAP2,CAP1,GNAS,GNAI2,GNAI3,GART,GBAS,GUK1,GUCY1B3,ATP5L,AK3,PAICS,HPRT1,IMPDH2,IMPDH1,MTHFD1,NT5E,OAS2,OAS1,NME7,NF1,NME2,NME3,PPAT,PRPS1,PRKCA,PFAS,RP2,PRPS2,PID1,PANK4,ADNP
GO: Biological Process	GO:0000087	M phase of mitotic cell cycle	0.002925	102	393	CDC16,BUB3,ARHGEF2,ZW10,ATM,SMC3,CLTCL1,NIPBL,USP9X,SMC1A,CUL3,OFD1,CDC23,AHCTF1,CDK2,RUVBL1,CDC42,CDK11B,SEPT7,SH2B1,CDK1,CDK13,CETN2,CKAP5,NEDD1,CLTC,NUP37,CSNK1A1,DCTN1,NOLC1,DAPK3,DIS3L2,KIF3B,CENPV,ARHGEF10,MAPRE2,SUGT1,TXNL4A,VCPIP1,FLNA,MCMBP,NUP85,DYNC1LI1,TUBB3,PRMT5,STAG1,STAG2,NUDC,DCTN2,HTATIP2,ASPM,EML4,KIF2A,TAOK1,BIRC6,TUBB2B,NUMA1,ANAPC1,PEBP1,NEK9,PPP1R12A,ANAPC4,NUP107,SEPT2,PPP…
GO: Biological Process	GO:0006955	immune response	0.002932	264	1126	A2M,ABR,AK7,RIPK1,ADAR,ADA,KYNU,VNN1,AIF1,AMBP,ANXA3,APOA4,APOA2,ARF6,ARRB2,ARHGDIB,AZGP1,BCL2,BST1,BTK,C1R,C1QC,C2,C1QBP,SERPING1,C6,C7,C8A,C8B,C8G,C9,C4BPA,C5,DAK,CAMK2D,CAMK2G,CAPZA1,CAPZA2,IKBKAP,CACNB3,PRKRA,PIAS1,LSM14A,CASP1,CASP8,PRKD2,CD14,SAMHD1,SIN3A,CDH1,CDK1,CD81,CD74,CD44,CD59,CHIT1,CTSC,CCR1,CLU,CREBBP,ECSIT,COL3A1,COL4A3BP,SPG21,UNC13D,CTSS,CTSB,CTSH,CTSL1,MAPK14,YTHDF2,ATG9A,CSK,…
GO: Biological Process	GO:0036260	RNA capping	0.002971	14	33	RNGTT,RNMT,GTF2F2,METTL1,MNAT1,NCBP1,POLR2C,POLR2E,POLR2G,POLR2H,POLR2A,POLR2B,SUPT5H,FTSJD2
GO: Biological Process	GO:0072529	pyrimidine-containing compound catabolic process	0.002971	14	33	MBD4,CDA,CRMP1,TYMP,UPB1,DPYSL3,DPYSL2,DPYD,DPYSL4,ALDH6A1,NT5E,SMUG1,UPP1,NT5C
GO: Biological Process	GO:0009452	7-methylguanosine RNA capping	0.002971	14	33	RNGTT,RNMT,GTF2F2,METTL1,MNAT1,NCBP1,POLR2C,POLR2E,POLR2G,POLR2H,POLR2A,POLR2B,SUPT5H,FTSJD2
GO: Biological Process	GO:0022900	electron transport chain	0.00298	46	155	ATP5C1,ATP5A1,ATP5J,TXN2,CMAHP,SLC25A12,COX6B1,COX4I1,SLC25A13,CYB5A,CYBB,CYC1,TXNL1,COX5A,DLD,FDXR,ETFDH,ETFB,ETFA,CYB5B,NDUFA13,ATP5L,MYBBP1A,TMX1,FADS1,MECP2,ERO1L,NDUFA8,NDUFA10,NDUFB5,NDUFB9,NDUFB6,NDUFS1,NDUFS3,NDUFV1,NDUFS2,NDUFS8,NDUFA12,TMX4,SLC1A3,SDHA,UQCRB,UQCRC2,UQCRC1,TXNRD1,ALDH5A1
GO: Biological Process	GO:0071466	cellular response to xenobiotic stimulus	0.003009	45	151	NAT1,ADH1B,ADH7,ALDH1A1,PAPSS2,PAPSS1,AIP,CYP2U1,COMT,GGCT,CRYZ,CYP11A1,CYP27A1,CYP17A1,CYP1B1,NQO1,CYP7B1,ACSL1,EPHX2,FMO4,GCLC,BPNT1,GSTP1,GSTM4,GSTM1,GSS,GSTA4,SULT1C4,MAT2B,NCEH1,MTR,MAOB,MAT2A,MGST2,MGST3,MGST1,CNDP2,ACSS2,PAOX,PTGS1,PTGIS,TBXAS1,ACSS1,UGP2,UGDH
GO: Biological Process	GO:0043558	regulation of translational initiation in response to stress	0.003193	6	9	EIF2B5,EIF2B4,EIF2B3,EIF2S1,EIF2B1,FECH
GO: Biological Process	GO:0006782	protoporphyrinogen IX biosynthetic process	0.003193	6	9	ALAD,CPOX,HMBS,IREB2,PPOX,UROD
GO: Biological Process	GO:0042769	DNA damage response, detection of DNA damage	0.003193	6	9	PARP1,MRPS35,DNAJA1,PNKP,MRPS11,MRPS9
GO: Biological Process	GO:0043312	neutrophil degranulation	0.003193	6	9	ABR,ANXA3,MYO1F,STXBP2,STXBP3,SYK
GO: Biological Process	GO:0046037	GMP metabolic process	0.003193	6	9	GMPS,GMPR2,GUK1,HPRT1,IMPDH2,IMPDH1
GO: Biological Process	GO:0008637	apoptotic mitochondrial changes	0.003248	24	69	FAM162A,AKT1,SLC25A4,AIFM1,BID,BAK1,BAX,BCL2,CASP7,CLU,PPIF,DNM1L,GGCT,SH3GLB1,FIS1,GPX1,HK2,IFIT2,SMAD3,OPA1,MAPK9,ATG3,PYCARD,DAP3
GO: Biological Process	GO:0030512	negative regulation of transforming growth factor beta receptor signaling pathway	0.003248	24	69	USP15,UCHL5,FBN1,STRAP,GLG1,STUB1,SNX6,HSPA5,SMAD2,SMAD3,LTBP1,PPP1CC,PPP1CA,PPM1A,PDPK1,PIN1,LEMD3,RPS27A,TGFBR2,TGFBR3,TGFB1I1,ASPN,XPO1,NEDD4L
GO: Biological Process	GO:0046782	regulation of viral transcription	0.003248	24	69	NELFB,NELFCD,CDK9,RSF1,INPP5K,SUPT16H,GTF2F2,MNAT1,NCBP1,POLR2C,POLR2E,POLR2G,POLR2H,POLR2A,POLR2B,PFN1,SMARCB1,SMARCA4,TCEB1,SUPT5H,SSRP1,NELFA,TARDBP,NELFE
GO: Biological Process	GO:0006370	7-methylguanosine mRNA capping	0.003323	13	30	RNGTT,RNMT,GTF2F2,MNAT1,NCBP1,POLR2C,POLR2E,POLR2G,POLR2H,POLR2A,POLR2B,SUPT5H,FTSJD2
GO: Biological Process	GO:0051592	response to calcium ion	0.003474	32	100	IQGAP1,ACTG1,ANXA11,ANXA7,ASPH,CALM3,CAV1,AKR1C3,SLC25A12,CLIC4,PDCD6,SLC25A13,DPEP1,EGFR,PTK2B,FGG,FGB,FGA,GDI1,TXNIP,HTT,KRT10,MNAT1,PEBP1,NEDD4,PPP3CA,PLCD1,THBS1,STIM1,ALG2,D2HGDH,SEC31A
GO: Biological Process	GO:0032368	regulation of lipid transport	0.003574	26	77	ABCA1,AKT1,AKT2,APOA4,APOA2,APOE,APOC3,APOC2,CETP,ACSL5,NCOR1,ACSL4,HNRNPK,ITGAV,LRP1,MIF,NFKB1,PON1,MAPK9,PTPN11,SCP2,LAMTOR1,THBS1,SYK,NR1H2,ACSL6
GO: Biological Process	GO:0070585	protein localization to mitochondrion	0.003577	22	62	TIMM13,AIP,SLC25A6,SAMM50,BID,BAX,TOMM70A,MFN2,PMPCB,TOMM40,TIMM44,SH3GLB1,TRNT1,FIS1,GFER,MTX2,HSPA4,MIPEP,TOMM22,MARCH5,YWHAZ,PMPCA
GO: Biological Process	GO:0072657	protein localization to membrane	0.003583	35	112	AKT1,AKT2,ANK2,ANK3,ARF6,RHOG,BID,PIP5K1A,CDH1,C2CD5,FLOT1,DLG1,INPP5K,TMED2,FLNA,GNB2L1,MYL12A,AGRN,SORBS1,KIF5B,SPTBN4,PAK1,MYO5A,NME7,PDPK1,DENND4C,PACS1,PIK3R1,IFT122,SCP2,PID1,SPTBN1,FCHO2,EHD3,PACS2
GO: Biological Process	GO:0042147	retrograde transport, endosome to Golgi	0.003619	15	37	SPAG9,ARL1,VPS51,STX10,ARFRP1,GOSR1,VPS26A,SNX6,YKT6,LMAN1,SNX8,VPS35,SNX1,TMED9,SURF4
GO: Biological Process	GO:0046854	phosphatidylinositol phosphorylation	0.003619	15	37	PIP5K1A,IP6K1,INPP5K,BPNT1,INPPL1,INPP5B,INPP5A,INPP1,IMPA1,OCRL,PIK3C2A,PIK3CA,PIK3C3,PIK3R1,IMPAD1
GO: Biological Process	GO:0070613	regulation of protein processing	0.003658	17	44	A2M,C2,C1QBP,SERPING1,C6,C4BPA,CD59,F12,GLG1,KLKB1,INPP5B,ASTL,SERPINF2,SERPINE2,RPS6KA2,THBS1,CLEC3B
GO: Biological Process	GO:0050854	regulation of antigen receptor-mediated signaling pathway	0.00368	12	27	ADA,PRKD2,LPXN,DUSP3,MALT1,LYN,PAWR,PRKCB,PHPT1,PTPN6,PTPRC,THY1
GO: Biological Process	GO:0035337	fatty-acyl-CoA metabolic process	0.00368	12	27	ACACA,DGAT1,ACSL5,DBT,FASN,ACSL3,ACSL1,ACSL4,GCDH,HSD17B4,SLC25A1,ACSL6
GO: Biological Process	GO:0014037	Schwann cell differentiation	0.00368	12	27	AKT1,AKT2,CDK1,DAG1,CYP11A1,ARHGEF10,NDRG1,GPC1,LAMB2,NF1,RELA,SOD1
GO: Biological Process	GO:0032414	positive regulation of ion transmembrane transporter activity	0.00368	12	27	ACTN4,ACTN2,ANK2,ANK3,ASPH,CALM3,CHP1,STIM2,PLCG2,STIM1,NEDD4L,PLCB1
GO: Biological Process	GO:0044766	multi-organism transport	0.00368	12	27	THOC5,DERL1,THOC6,THOC1,ALYREF,NMT2,VPS28,IFIT1,THOC2,RPS27A,TSG101,DDX39B
GO: Biological Process	GO:0009101	glycoprotein biosynthetic process	0.003691	89	339	DPM1,PARP1,B3GAT3,AATF,BGN,BCL2,CANX,CALR,GLCE,MLEC,STT3B,SEC24D,PARP3,PARP2,CTNNB1,ALG12,ALG3,VCAN,CSPG4,DCN,DDOST,DAD1,ALG9,ITM2B,SEC24C,MAN1A2,SEC24A,EXTL3,CHP1,MAN1B1,FUT8,SEC23A,SAR1B,GNAQ,SEC24B,GNA11,GALNT2,GFPT1,MGEA5,ARFGEF1,PDIA3,STT3A,LMAN1,B3GALTL,COG3,MAN1A1,MAN2A1,MGAT1,MPI,NPC1,OAS2,UGGT1,PAWR,POGLUT1,ALG5,GMPPB,GMPPA,GNPNAT1,COG7,TRAK2,PRKCSH,CSGALNACT2,FUT11,PGM3,PMM2,MCFD2,SERPI…
GO: Biological Process	GO:0016570	histone modification	0.003793	79	296	ACTL6A,NOC2L,ASH2L,BAZ1B,RPS6KA4,ARRB1,ATM,TRRAP,NIPBL,HAT1,CDK2,RUVBL1,SIN3A,CDK1,MLL4,CDK9,RNF40,BRCC3,HDAC6,CREBBP,HUWE1,CTBP1,UBR5,TRIP12,GTF3C4,DNMT1,NCOR1,CTR9,CDC73,WDR61,WDR82,MORF4L1,BRD8,RUVBL2,SRCAP,PHF17,SETD7,RBM14,PRMT5,MGEA5,HCFC1,HDAC2,CTCF,CARM1,PRMT1,JAK2,EP400,MECP2,MEN1,SMARCAD1,SMYD3,PKN1,MAPK3,PRKCA,PRKCB,PHB,PML,YEATS2,RING1,HDAC8,RBBP5,RNF20,SMARCA4,SET,SKP1,PAF1,TAF1,TAF7…
GO: Biological Process	GO:0051053	negative regulation of DNA metabolic process	0.003809	23	66	SMC3,SMC1A,POT1,CDK9,UBR5,TRIP12,ERCC4,STAG2,MSH6,INPPL1,MRE11A,MSH2,MSH3,MLH1,NF2,PML,TERF2IP,GTPBP4,RPS3,PID1,CDAN1,WAPAL,PDS5A
GO: Biological Process	GO:0032321	positive regulation of Rho GTPase activity	0.003809	23	66	ARHGAP5,ARHGAP4,RHOG,PIP5K1A,PKP4,DOCK4,PTK2B,ERBB2,CDC42EP2,NCKAP1L,ARHGAP35,PREX1,MYO9B,PIN1,RAP1GDS1,ARAP1,THY1,SYDE1,DOCK7,SRGAP2,SCRIB,ARHGAP26,TAX1BP3
GO: Biological Process	GO:0042063	gliogenesis	0.003936	53	186	AGT,AKT1,ARHGEF7,EIF2B2,EIF2B5,EIF2B4,EIF2B3,AKT2,PHGDH,ANXA1,BCL2,CD9,CDK6,CDK1,CTNNB1,VCAN,CSPG4,DAG1,DBI,CYP11A1,DMD,ARHGEF10,EGFR,EIF2B1,PTK2B,ERBB2,F2,NDRG1,LAMC3,HDAC2,GPC1,GSN,HMBS,PRPF19,HEXB,IL6ST,LYN,LAMB2,MMP14,RTN4,NF1,NFIB,NF2,PDGFRA,SERPINE2,RELA,PTK2,PTPRA,SOD1,SMARCA4,STAT3,VIM,SCRIB
GO: Biological Process	GO:0033559	unsaturated fatty acid metabolic process	0.004002	30	93	ACAA1,ACOX1,ABCD1,ALOX15,ALOX5,ANXA1,DEGS1,AKR1C3,PLA2G4C,CD74,ACSL1,EPHX2,PTGES2,PTGES3,HSD17B4,HPGDS,MGLL,LTA4H,FADS1,MGST2,MIF,DAGLB,MAPK9,RNPEP,PTGS1,PTGIS,PTGDS,SCP2,TBXAS1,SYK
GO: Biological Process	GO:0032479	regulation of type I interferon production	0.004014	24	70	RIPK1,UBE2L6,DDX3X,NLRX1,CYLD,ATG5,POLR3A,IRF3,MAVS,ZC3HAV1,ITCH,PCBP2,NFKB2,NFKB1,PIN1,RELA,TBK1,PYCARD,DDX58,RPS27A,TLR2,TNFAIP3,UBA7,TRIM25
GO: Biological Process	GO:0070527	platelet aggregation	0.004019	11	24	LYN,FERMT3,PRKG1,PRKCA,PDGFRA,PLEK,SERPINE2,STXBP1,STXBP3,SYK,UBASH3B
GO: Biological Process	GO:0009065	glutamine family amino acid catabolic process	0.004019	11	24	ASL,ALDH4A1,FAH,ASRGL1,GLS,GOT2,GOT1,GLUL,PPAT,DDAH1,DDAH2
GO: Biological Process	GO:0010543	regulation of platelet activation	0.004019	11	24	APOE,F2,HRG,LYN,PRKG1,PRKCA,PDGFRA,PLEK,SERPINE2,SYK,UBASH3B
GO: Biological Process	GO:0033160	positive regulation of protein import into nucleus, translocation	0.004081	7	12	CDK1,UBR5,TMEM173,HSP90AB1,JAK2,MAVS,MED1
GO: Biological Process	GO:0010510	regulation of acetyl-CoA biosynthetic process from pyruvate	0.004081	7	12	DLD,PDHB,PDK3,PDK2,PDP1,PDPR,PDHX
GO: Biological Process	GO:0043968	histone H2A acetylation	0.004081	7	12	ACTL6A,TRRAP,RUVBL1,MORF4L1,BRD8,RUVBL2,EP400
GO: Biological Process	GO:0072583	clathrin-mediated endocytosis	0.004081	7	12	WASL,CANX,DAB2,SCYL2,FNBP1L,AAK1,FCHO2
GO: Biological Process	GO:0051597	response to methylmercury	0.004081	7	12	ARSA,ARSB,CPOX,CYP17A1,FECH,HMBS,UROD
GO: Biological Process	GO:0031581	hemidesmosome assembly	0.004081	7	12	DST,ITGA6,LAMC1,LAMC2,LAMA3,KRT5,PLEC
GO: Biological Process	GO:0032012	regulation of ARF protein signal transduction	0.004117	18	48	ARFGAP3,GBF1,ACAP1,GIT2,IQSEC1,CYTH1,ADAP1,ARFGEF2,ARFGEF1,ASAP1,AGFG1,SMAP2,ARFGAP1,GIT1,ARAP1,AGAP3,ACAP2,ARFGAP2
GO: Biological Process	GO:0043502	regulation of muscle adaptation	0.004126	14	34	ADK,AGT,AIF1,CAMK2D,CAMK2G,FDPS,AKAP13,MGEA5,GLRX3,IL6ST,MTPN,LMCD1,PRKCA,PPP3CA
GO: Biological Process	GO:0032411	positive regulation of transporter activity	0.004126	14	34	ACTN4,ACTN2,ANK2,ANK3,ASPH,CALM3,CHP1,PARK7,STIM2,PON1,PLCG2,STIM1,NEDD4L,PLCB1
GO: Biological Process	GO:0010812	negative regulation of cell-substrate adhesion	0.004126	14	34	ARHGAP6,CASK,COL1A1,LGALS1,MMP14,NF1,NF2,PLG,PIK3R1,RASA1,THBS1,TBCD,SRC,KANK1
GO: Biological Process	GO:0042398	cellular modified amino acid biosynthetic process	0.004191	21	59	ATIC,ALDH7A1,MTHFD1L,GGCT,PADI2,GCLC,GART,GAMT,GATM,HAGH,GSS,MAT2B,SLC27A1,MTHFD1,MAT2A,MGST2,MGST3,CNDP2,ALDH18A1,PADI4,SEPHS2
GO: Biological Process	GO:2001251	negative regulation of chromosome organization	0.00423	16	41	NOC2L,POT1,SIN3A,CTBP1,UBR5,TRIP12,DNMT1,ERCC4,MECP2,PML,TERF2IP,SET,SETMAR,TAF7,KDM1A,WAPAL
GO: Biological Process	GO:0072378	blood coagulation, fibrin clot formation	0.004305	10	21	A2M,C1QBP,SERPING1,F12,F2,F9,KNG1,KLKB1,PRCP,VWF
GO: Biological Process	GO:0033006	regulation of mast cell activation involved in immune response	0.004305	10	21	UNC13D,FGR,FER,FES,HMOX1,LYN,PDPK1,PLD2,STXBP2,SYK
GO: Biological Process	GO:0033146	regulation of intracellular estrogen receptor signaling pathway	0.004305	10	21	KANK2,DDX5,CYP7B1,CARM1,DDX17,STRN3,PAK1,MED1,SRC,MLL2
GO: Biological Process	GO:0046822	regulation of nucleocytoplasmic transport	0.004314	48	166	PARP1,FZD1,CDH1,CDK1,G3BP2,SUFU,UBR5,MAPK14,NOLC1,DAB2,CYLD,EMD,EGFR,CHP1,MTOR,TMEM173,FLNA,FAF1,RBPMS,TACC3,GNAQ,HCLS1,KHDRBS1,CHERP,HSP90AB1,JUP,JAK2,SMAD3,SMAD4,MAVS,PRDX1,PPP1R12A,NEDD4,NF1,PPP1CC,MED1,PRKACA,XPO4,RANGAP1,PTPN11,DAB2IP,DDX58,TLR2,UACA,XPO1,TRIP6,KANK1,FBXW11
GO: Biological Process	GO:0016569	covalent chromatin modification	0.004436	80	302	ACTL6A,NOC2L,ASH2L,BAZ1B,RPS6KA4,ARRB1,ATM,TRRAP,NIPBL,HAT1,CDK2,RUVBL1,SIN3A,CDK1,MLL4,CDK9,RNF40,BRCC3,HDAC6,CREBBP,HUWE1,CTBP1,UBR5,TRIP12,GTF3C4,DNMT1,DNMT3A,NCOR1,CTR9,CDC73,WDR61,WDR82,MORF4L1,BRD8,RUVBL2,SRCAP,PHF17,SETD7,RBM14,PRMT5,MGEA5,HCFC1,HDAC2,CTCF,CARM1,PRMT1,JAK2,EP400,MECP2,MEN1,SMARCAD1,SMYD3,PKN1,MAPK3,PRKCA,PRKCB,PHB,PML,YEATS2,RING1,HDAC8,RBBP5,RNF20,SMARCA4,SET,SKP1,PAF1,TA…
GO: Biological Process	GO:0050686	negative regulation of mRNA processing	0.004449	8	15	C1QBP,SRSF9,HNRNPA2B1,U2AF2,PTBP1,SFSWAP,SRSF7,SRSF4
GO: Biological Process	GO:0051193	regulation of cofactor metabolic process	0.004449	8	15	DLD,PGAM1,PDHB,PDK3,PDK2,PDP1,PDPR,PDHX
GO: Biological Process	GO:0051196	regulation of coenzyme metabolic process	0.004449	8	15	DLD,PGAM1,PDHB,PDK3,PDK2,PDP1,PDPR,PDHX
GO: Biological Process	GO:0042219	cellular modified amino acid catabolic process	0.004449	8	15	KYNU,GGACT,CCBL1,ALDH4A1,PCYOX1L,PCYOX1,ALDH1L1,GOT2
GO: Biological Process	GO:2001238	positive regulation of extrinsic apoptotic signaling pathway	0.004479	9	18	RIPK1,BID,CAV1,DAPK3,CYLD,PAK2,PPP2R1B,PML,PYCARD
GO: Biological Process	GO:0009200	deoxyribonucleoside triphosphate metabolic process	0.004479	9	18	ADA,ADK,AK2,DGUOK,NUDT16,DUT,GUK1,MGEA5,AK3
GO: Biological Process	GO:0008063	Toll signaling pathway	0.004485	27	82	RIPK1,BTK,CD14,CDK1,MAPK14,MAPKAPK2,DUSP3,TAB1,IRF3,NFKB2,NFKB1,MAP2K1,MAP2K2,MAP2K3,MAPK9,MAP2K6,MAPK3,MAPK1,RELA,TBK1,MAP2K4,RPS6KA1,RPS6KA2,RPS6KA3,RPS27A,TLR2,MAPKAPK3
GO: Biological Process	GO:0045055	regulated secretory pathway	0.004536	19	52	ABR,ANXA3,BTK,UNC13D,TMED10,FGR,FES,HCK,HMOX1,LYN,MYO1F,PDPK1,PLD2,RAB27A,STXBP2,STXBP3,SYK,YWHAZ,LAT2
GO: Biological Process	GO:0010647	positive regulation of cell communication	0.00457	220	932	RIPK1,ADA,TRADD,PARP1,MBD2,AGT,AKT2,SPAG9,ANK3,ARRB1,ARRB2,ATM,BID,BAK1,BAX,C1QBP,C5,CAMK2D,LSM14A,CBL,CAV1,CASP1,CASP8,CAT,LAMTOR3,PRKD2,AKR1C3,CDC42,CDK1,CD81,CD74,CD44,BCLAF1,CHI3L1,USP34,PTPLAD1,CCR1,COL1A1,CLU,HDAC6,DNM1L,CTNNA1,TAOK3,SORBS3,CTNNB1,CRLF3,UBR5,MAPK14,CSNK2B,CSPG4,CSK,LRRK2,DDX5,DAPK3,MAPKAPK2,DAB2,CYLD,ECE1,ECM1,AKAP12,DOCK2,CDC73,EGFR,PTK2B,FGR,MPP7,MALT1,ERBB2,F2,PDCD10,MTO…
GO: Biological Process	GO:0034381	plasma lipoprotein particle clearance	0.00468	13	31	APOB,APOA2,APOE,APOC3,APOC2,CSK,EHD1,HMOX1,HNRNPK,LRPAP1,MSR1,APOM,VLDLR
GO: Biological Process	GO:0009394	2'-deoxyribonucleotide metabolic process	0.00468	13	31	ADA,MBD4,ADK,AK2,DGUOK,NUDT16,DUT,NUDT18,GUK1,MGEA5,AK3,SMUG1,NT5C
GO: Biological Process	GO:0006270	DNA replication initiation	0.00468	13	31	CDK2,MCM4,MCM3,MCM6,MCM5,MCM2,MCM7,WRNIP1,ORC4,ORC2,NBN,LRWD1,PURA
GO: Biological Process	GO:0006919	activation of cysteine-type endopeptidase activity involved in apoptotic process	0.004691	29	90	RIPK1,FAM162A,TRADD,APAF1,AIFM1,BAK1,BAX,C6,C9,CASP1,CASP7,CASP8,CDKN1B,PDCD6,GNB2L1,RPS27L,HIP1,JAK2,SMAD3,MAP3K5,MAPK9,PML,PYCARD,S100A9,S100A8,MTCH1,RPS3,IFT57,VCP
GO: Biological Process	GO:0002429	immune response-activating cell surface receptor signaling pathway	0.004698	42	142	ADA,BCL2,BTK,CACNB3,PRKD2,SPG21,CSK,LPXN,DUSP3,MALT1,VAV3,NCKAP1L,HLA-DRA,HLA-DPA1,IGHM,LYN,LCP2,MNDA,PAWR,PAK1,PAK2,NCK1,NFKB1,MAPK1,PRKCB,PDPK1,ENAH,PLCG1,PLCG2,PIK3CA,PIK3R1,RELA,PHPT1,PTPN6,PTPRC,RPS27A,THY1,TLR2,SYK,LAT2,WAS,VASP
GO: Biological Process	GO:0045785	positive regulation of cell adhesion	0.004698	42	142	ALOX15,ANK3,C1QBP,CALR,PRKD2,CDK6,CD44,SPOCK2,ARPC2,DAB2,PPM1F,PTK2B,PLEKHA2,ERBB2,EMILIN1,TRIOBP,VAV3,NCKAP1L,HRG,JAK2,ITGAL,EPB41L5,ITGAV,ITGA5,ITGA6,ILK,SMAD3,LGALS1,NID1,PRKCA,SERPINF2,PLD2,PTK2,TGM2,THBS1,TNXB,SYK,SRC,KIFAP3,VAV1,UTRN,TPM1
GO: Biological Process	GO:0006220	pyrimidine nucleotide metabolic process	0.004793	17	45	MBD4,CTPS1,DCTD,TYMP,DUT,DPYD,AK3,CTPS2,NME7,NME2,NME3,PRPS1,RP2,SMUG1,UPP1,UMPS,NT5C
GO: Biological Process	GO:0006611	protein export from nucleus	0.004793	17	45	ADAR,CALR,NUTF2,EMD,AHCYL1,CHP1,NUPL2,XPO5,PRKACA,XPO4,RANGAP1,RAN,PTPN11,XPO1,XPO7,NUP214,XPO6
GO: Biological Process	GO:0035999	tetrahydrofolate interconversion	0.004838	5	7	MTHFD1L,MTHFD1,MTHFR,SHMT1,SHMT2
GO: Biological Process	GO:0006610	ribosomal protein import into nucleus	0.004838	5	7	IPO4,IPO11,KPNB1,IPO5,IPO9
GO: Biological Process	GO:0034380	high-density lipoprotein particle assembly	0.004838	5	7	ABCA1,APOA2,APOE,APOM,NR1H2
GO: Biological Process	GO:0006551	leucine metabolic process	0.004838	5	7	BCAT2,HMGCL,IVD,MCCC1,MCCC2
GO: Biological Process	GO:0000244	assembly of spliceosomal tri-snRNP	0.004838	5	7	PRPF31,DDX20,CD2BP2,LSM2,PRPF6
GO: Biological Process	GO:0032460	negative regulation of protein oligomerization	0.004838	5	7	CLU,CRBN,PEX14,PEX5,SRC
GO: Biological Process	GO:0035305	negative regulation of dephosphorylation	0.004838	5	7	IQGAP1,INPP5K,IGBP1,PPP2R4,YWHAB
GO: Biological Process	GO:0006108	malate metabolic process	0.004838	5	7	FH,ME3,ME2,MDH1,MDH2
GO: Biological Process	GO:0030388	fructose 1,6-bisphosphate metabolic process	0.004838	5	7	ALDOC,ALDOA,PFKM,PFKP,PFKL
GO: Biological Process	GO:0032055	negative regulation of translation in response to stress	0.004838	5	7	EIF2B5,EIF2B4,EIF2B3,EIF2B1,PML
GO: Biological Process	GO:0006578	amino-acid betaine biosynthetic process	0.004838	5	7	ACADM,ALDH9A1,ALDH7A1,SHMT1,TMLHE
GO: Biological Process	GO:0009304	tRNA transcription	0.004838	5	7	GTF3C4,GTF3C5,GTF3C3,GTF3C2,GTF3C1
GO: Biological Process	GO:1901339	regulation of store-operated calcium channel activity	0.004838	5	7	ASPH,STIM2,PLCG1,PLCG2,STIM1
GO: Biological Process	GO:2001243	negative regulation of intrinsic apoptotic signaling pathway	0.004838	5	7	RIPK1,DDX3X,OPA1,SRC,VDAC2
GO: Biological Process	GO:0090316	positive regulation of intracellular protein transport	0.004865	32	102	PARP1,ANK3,ASPH,CDH1,CDC42,CDK1,UBR5,MAPK14,DAB2,EMD,EGFR,ACSL3,CHP1,TMEM173,FLNA,RBPMS,HCLS1,CHERP,HSP90AB1,JUP,JAK2,SMAD3,SMAD4,MAVS,MED1,PRKACA,XPO4,DDX58,TLR2,UACA,TRIP6,KANK1
GO: Biological Process	GO:0040013	negative regulation of locomotion	0.004981	47	163	ABR,NRP1,ADA,AIF1,APOE,APEX1,ARHGAP4,BCL2,STK24,C5,CLIC4,CSNK2B,DAG1,SLC9A3R1,MMRN2,DPYSL3,DPEP1,NISCH,MIA3,HRG,HMOX1,RAP2C,ITGAV,ILK,LRP1,ABHD6,NF1,NF2,PLXNA3,PIN1,RAP2B,RAP2A,ROBO2,PTK2,RNF20,DAB2IP,GTPBP4,RRAS,TGFBR3,THY1,THBS1,NR2F2,VCL,TPM1,SRGAP2,KANK1,PLCB1
GO: Biological Process	GO:0014070	response to organic cyclic compound	0.004983	163	673	ACACA,ACAA1,ACADM,ACADS,ACAT1,ADA,KYNU,ADRBK1,AGL,AK4,ALDOC,ALPL,ALDH1A2,ASH2L,ANXA3,ANXA7,ANXA1,APOA4,APOA2,ARSA,ARSB,ASPH,ATP1A2,BAG1,BDH1,BID,BAK1,TXN2,BCKDHB,BCL2,FZD1,CA4,CA2,CALR,PRKRA,CAV1,CASP1,RAE1,CASP8,CAT,AKR1C3,PEA15,CDK2,CDH1,CDK1,CDKN1B,SRRT,COL1A1,ACSL5,CPT1A,CPN1,COMT,CTNNA1,CTNNB1,CTSB,CRYAB,DDX1,CYP11A1,CYP17A1,DIAPH1,CYP7B1,INPP5K,DPYSL2,ENO2,PTK2B,ACSL3,ACSL1,FECH,ERBB2,EPHX1…
GO: Biological Process	GO:0060333	interferon-gamma-mediated signaling pathway	0.00511	25	75	CAMK2D,CAMK2G,PIAS1,CD44,CDC37,GBP1,HCK,HSP90AB1,HPX,HLA-DRA,HLA-DPA1,ICAM1,JAK2,JAK1,IRF3,OAS2,OAS1,NCAM1,MED1,PML,PTPN1,PTPN11,PTPN6,STAT1,NR1H2
GO: Biological Process	GO:0042326	negative regulation of phosphorylation	0.005266	64	235	ADAR,AKT1,AHSG,APOE,ARRB1,BAK1,BAX,CAV1,CDKN1B,TAOK3,INPP5K,DUSP9,DUSP3,PPM1F,CHP1,GNB2L1,GNAQ,GMFB,SNX6,GSTP1,GPS1,PDCD4,HSPA4,KNG1,INPPL1,STK38,ILK,LYN,SMAD3,CHORDC1,WNK1,MEN1,MLLT1,PEBP1,PAK2,MICAL1,DEPTOR,AIDA,NF1,NF2,DNAJC3,PRKAR1A,PRKCA,PPP2CA,PPP2R1A,ENPP1,PDPK1,TRIM27,PYCARD,PTPN6,PTPRC,DAB2IP,DNAJC10,FAM129A,THY1,PID1,TNFAIP3,NR2F2,TAF7,YWHAG,UCHL1,TSC2,UBASH3B,AKT1S1
GO: Biological Process	GO:0009792	embryo development ending in birth or egg hatching	0.00527	148	606	FBXW8,ADAM10,ADA,ADD1,AKT1,EIF2S2,PHGDH,ALDH1A2,APAF1,APOB,PLOD3,PLCD3,ATM,ATP1B1,HECTD1,NIPBL,FZD1,C6,C5,COPS3,CAPN2,CUL3,CASP8,RIC8A,SIN3A,CDH1,CDK11B,C22orf28,SETDB1,COL1A1,MED12,MFN2,SUFU,ABI1,COL4A3BP,DNAJB6,CTNNB1,TRIM28,RDH10,DDX5,DAB2,DAD1,DLG1,ABCG2,INPP5K,ECE1,ROCK2,DUSP3,ENDOG,NCOR2,EGFR,ACSL4,TMED2,NCKAP1,NUP50,FUT8,GAB1,GABPA,KIF3A,TAB1,GNAS,HTT,GNA13,NSDHL,GRB2,ARHGAP35,PRMT1,PRPF19…
GO: Biological Process	GO:0033003	regulation of mast cell activation	0.005273	12	28	UNC13D,FGR,FER,FES,HMOX1,LYN,PDPK1,PLD2,PTPRE,PVRL2,STXBP2,SYK
GO: Biological Process	GO:0003012	muscle system process	0.005297	83	317	ACTA2,ACTC1,ACTN2,ADA,ADK,ADRBK1,AGT,AIF1,ALDOA,ANK2,ANXA6,MYOF,ASPH,ATP1A1,ATP1A2,ATP2A2,LMOD1,MYL6B,CAMK2D,CAMK2G,CALD1,CALM3,CAV1,ARHGEF11,CNN3,CNN1,COL4A3BP,SORBS3,CRYAB,DAPK3,DLG1,DMD,DES,ROCK2,DSP,DSG2,NUP155,EMD,FDPS,AKAP13,GAA,FLII,MYL9,GAMT,MGEA5,SORBS1,GLRX3,HMOX1,IL6ST,KNG1,JUP,ITGB5,ITGA1,SMAD5,MTPN,LMCD1,MYH11,MYL6,MYLK,MAP2K1,MAP2K3,MAP2K6,PRKCA,PPP3CA,PIK3C2A,PIK3CA,RAP1GDS1,ROCK1,…
GO: Biological Process	GO:0030198	extracellular matrix organization	0.005559	62	227	AGT,ANXA2,PLOD3,RECK,SERPINH1,OLFML2B,RIC8A,SPOCK2,COL1A1,COL15A1,COL12A1,COL5A2,COL6A1,COL4A6,COL6A2,COL6A3,COL4A1,COL3A1,COL4A2,COLGALT1,DPT,DPP4,FBLN1,EMILIN1,FN1,CRTAP,COL18A1,POSTN,FBLN5,LEPREL2,HSPG2,KLKB1,ILK,SMAD3,COL21A1,LUM,LGALS3,LAMC1,LAMB2,NPHP3,MMP14,MMP9,MMP2,P4HA1,P4HB,MYH11,MYO1E,VWA1,NF1,NFKB2,NID1,PPIB,LEPRE1,PDGFRA,SERPINF2,PLG,PTK2,SMARCA4,TGFBI,TNXB,TFIP11,COL14A1
GO: Biological Process	GO:0050819	negative regulation of coagulation	0.005574	16	42	ANXA5,ANXA2,APOE,SERPING1,CPB2,F12,F2,HRG,KNG1,KLKB1,PROC,PDGFRA,SERPINF2,PLG,SERPINE2,THBS1
GO: Biological Process	GO:0046834	lipid phosphorylation	0.005574	16	42	PIP5K1A,IP6K1,INPP5K,BPNT1,INPPL1,INPP5B,INPP5A,INPP1,IMPA1,OCRL,PIK3C2A,PIK3CA,PIK3C3,PIK3R1,AGK,IMPAD1
GO: Biological Process	GO:0010975	regulation of neuron projection development	0.005588	69	257	NRP1,AKT1,APOE,ARF6,ARHGAP4,ARHGDIA,ARHGEF1,STK24,NUMB,CHN1,FIG4,CNTN1,ACTR3,TRPV2,CSPG4,LRRK2,DBN1,DGUOK,DPYSL3,PTK2B,FES,FKBP4,TRPV4,EPHB3,WDR36,STK25,GOLGA2,GDI1,HDAC2,PDLIM5,INPPL1,ILK,LYN,CAPRIN1,PREX1,LGALS1,NPTN,MAP1B,MAPT,MIF,RTN4,NEDD4,NME2,PRKCSH,PRKD1,PPP2R5D,PLXNA3,SERPINE2,RAP2A,ROBO2,PTK7,PTK2,PTPRD,PTPRF,PTPRG,SSH1,PLXNB2,THY1,SSH3,RUFY3,YWHAH,VLDLR,VIM,KIF13B,ACSL6,SYNE1,ADNP,SPG2…
GO: Biological Process	GO:0006325	chromatin organization	0.005651	140	571	ACTL6A,NOC2L,ASH2L,BAZ1B,RPS6KA4,ARRB1,ATM,TRRAP,ARID1A,NIPBL,HAT1,CHD5,SMARCA5,HIRIP3,CDK2,RUVBL1,SIN3A,CDK1,CHD4,CHD3,MLL4,CDK9,RNF40,BRCC3,HDAC6,CREBBP,HUWE1,CTBP1,UBR5,H2AFV,MTA2,DAPK3,TRIP12,TBL1XR1,GTF3C4,DNMT1,DNMT3A,CENPV,RSF1,CHD1L,H2AFY,BRE,KDM3B,NCOR1,CTR9,CDC73,WDR61,WDR82,MORF4L1,BRD8,RUVBL2,SRCAP,SMARCAL1,SUPT16H,PHF17,SETD7,RBM14,PRMT5,SAP18,MGEA5,HCFC1,HDAC2,CTCF,H2AFX,HP1BP3,CARM…
GO: Biological Process	GO:0006909	phagocytosis	0.005733	33	107	ABCA1,ABR,AHSG,AIF1,ANXA3,ANXA11,PIP5K1A,CALR,CD14,ELMO1,UNC13D,CSK,DOCK2,DOCK1,FGR,CORO1A,GNB2L1,HCK,NCKAP1L,ITGAV,LRP1,MYH9,PYCARD,PTK2,RAC1,ELMO2,CORO1C,TGM2,THBS1,SYK,CD93,VAV1,JMJD6
GO: Biological Process	GO:0034130	toll-like receptor 1 signaling pathway	0.005788	23	68	BTK,CDK1,MAPK14,MAPKAPK2,DUSP3,TAB1,NFKB2,NFKB1,MAP2K1,MAP2K2,MAP2K3,MAPK9,MAP2K6,MAPK3,MAPK1,RELA,MAP2K4,RPS6KA1,RPS6KA2,RPS6KA3,RPS27A,TLR2,MAPKAPK3
GO: Biological Process	GO:0060548	negative regulation of cell death	0.005913	174	726	AARS,RIPK1,ADAR,ADA,NOC2L,AGT,VNN1,AKT1,AIF1,ALB,AKT2,ANXA4,ANXA5,SLC25A4,ANXA1,APOE,ARAF,AATF,ARRB2,ARHGDIA,ATM,BAG1,PRDX5,BAX,BCL2,API5,CBL,CAV1,CAT,PEA15,SIN3A,CDK1,CD74,CD44,CD59,KANK2,CDKN1B,CNTFR,CLU,CTNNA1,CTNNB1,CTSB,CTSH,CRYAB,DDX3X,DAB2,DAD1,ATG5,BAG3,DPEP1,EGFR,PTK2B,PRDX3,MALT1,ERBB2,CLN8,HSPH1,PDCD10,FN1,GLO1,ACAA2,GCLC,GNAQ,CFDP1,SH3GLB1,YAP1,APIP,PTGES3,GSTP1,HCK,HTT,HDAC2,NCKAP1L,…
GO: Biological Process	GO:0009896	positive regulation of catabolic process	0.006052	43	148	AKT1,AKT2,APOA4,APOA2,APOE,APOC2,CUL4B,CUL4A,GGA1,PNPT1,CDKN1B,CLU,ACSL5,CPT1A,LRRK2,DAB2,ARHGEF10,LPCAT1,GCLC,GNB2L1,ABHD5,STUB1,ATG7,MIF,ZC3HAV1,ITCH,SH3D19,NRD1,PAFAH1B2,MTDH,NEDD4,PRKAA1,PPP2R3A,SNX1,HSPBP1,TNFAIP3,SUPT5H,TAF1,VCP,NEDD4L,LARP1,USP5,ATG4B
GO: Biological Process	GO:0002697	regulation of immune effector process	0.006092	66	245	A2M,ABR,AP1M1,AP1S2,AP2B1,AP1B1,AP2A2,AP2A1,AP1G1,APOA2,ARRB2,BTK,C2,C1QBP,SERPING1,C6,C4BPA,SIN3A,CD74,CD59,ELMO1,ATP6V1H,AP2M1,UNC13D,ATG5,DPP4,DOCK2,FGR,FER,FES,MALT1,TMEM173,HCK,HPX,HMOX1,IFIT1,ICAM1,IRF3,LYN,MAVS,MIF,ZC3HAV1,ITCH,PAK2,PCBP2,PPP3CB,DDX60,PDPK1,PML,PACS1,PLD2,PYCARD,RAC1,PTPN6,PTPRC,PVRL2,SASH3,DDX58,CADM1,TLR2,TNFAIP3,STXBP2,SYK,STAT6,STAT5A,PGLYRP2
GO: Biological Process	GO:0043062	extracellular structure organization	0.006165	62	228	AGT,ANXA2,PLOD3,RECK,SERPINH1,OLFML2B,RIC8A,SPOCK2,COL1A1,COL15A1,COL12A1,COL5A2,COL6A1,COL4A6,COL6A2,COL6A3,COL4A1,COL3A1,COL4A2,COLGALT1,DPT,DPP4,FBLN1,EMILIN1,FN1,CRTAP,COL18A1,POSTN,FBLN5,LEPREL2,HSPG2,KLKB1,ILK,SMAD3,COL21A1,LUM,LGALS3,LAMC1,LAMB2,NPHP3,MMP14,MMP9,MMP2,P4HA1,P4HB,MYH11,MYO1E,VWA1,NF1,NFKB2,NID1,PPIB,LEPRE1,PDGFRA,SERPINF2,PLG,PTK2,SMARCA4,TGFBI,TNXB,TFIP11,COL14A1
GO: Biological Process	GO:0006801	superoxide metabolic process	0.006198	17	46	ACP5,AGT,APOA4,AATF,CYBB,NQO1,SH3PXD2A,GSTP1,FBLN5,PREX1,MPO,PRDX1,NCF2,SOD3,SOD1,PRDX2,SYK
GO: Biological Process	GO:0006692	prostanoid metabolic process	0.006449	13	32	ACOX1,ANXA1,AKR1C3,CD74,PTGES2,PTGES3,HPGDS,MIF,MAPK9,PTGS1,PTGIS,PTGDS,TBXAS1
GO: Biological Process	GO:0010770	positive regulation of cell morphogenesis involved in differentiation	0.006449	13	32	C1QBP,CALR,COL1A1,ARPC2,CTNNB1,DAB2,TRIOBP,EPB41L5,SMAD2,SMAD3,SMAD4,MAPK9,TGFB1I1
GO: Biological Process	GO:0006693	prostaglandin metabolic process	0.006449	13	32	ACOX1,ANXA1,AKR1C3,CD74,PTGES2,PTGES3,HPGDS,MIF,MAPK9,PTGS1,PTGIS,PTGDS,TBXAS1
GO: Biological Process	GO:0042558	pteridine-containing compound metabolic process	0.006449	13	32	ATIC,MTHFD1L,ALDH1L1,FOLH1,GART,MTHFD1,MTHFR,MTR,PCBD1,QDPR,SHMT1,SHMT2,SPR
GO: Biological Process	GO:0045216	cell-cell junction organization	0.006471	38	128	ACTG1,GNPAT,NUMB,CD9,CDH11,CDH3,CDH1,CDC42,CTNNA1,CTNND1,CTNNB1,DLG1,RAB8B,DSP,MPP7,TRPV4,F11R,JUP,SMAD3,TLN2,CCM2,MLLT4,MTDH,NF2,PKN2,PRKCA,PRKACA,RAC1,PVRL2,CADM1,TJP1,TLN1,STRN,TBCD,FBF1,SRC,VCL,NEDD4L
GO: Biological Process	GO:0030195	negative regulation of blood coagulation	0.006478	15	39	ANXA2,APOE,SERPING1,CPB2,F12,F2,HRG,KNG1,KLKB1,PROC,PDGFRA,SERPINF2,PLG,SERPINE2,THBS1
GO: Biological Process	GO:1900047	negative regulation of hemostasis	0.006478	15	39	ANXA2,APOE,SERPING1,CPB2,F12,F2,HRG,KNG1,KLKB1,PROC,PDGFRA,SERPINF2,PLG,SERPINE2,THBS1
GO: Biological Process	GO:0046686	response to cadmium ion	0.006478	15	39	ALAD,BDH1,AKR1C3,CDK1,ABCB6,CTNNB1,CYP11A1,GSN,GSS,HMOX1,NPC1,PCNA,MAPK9,SORD,HAAO
GO: Biological Process	GO:0010611	regulation of cardiac muscle hypertrophy	0.006483	10	22	ADK,AGT,CAMK2D,FDPS,AKAP13,GLRX3,IL6ST,MTPN,LMCD1,PRKCA
GO: Biological Process	GO:0051647	nucleus localization	0.006483	10	22	SUN2,CDC42BPA,CDC42,DMD,TACC3,NUDC,PCM1,PTK2,SYNE1,HOOK3
GO: Biological Process	GO:0072655	establishment of protein localization to mitochondrion	0.006506	21	61	TIMM13,AIP,SLC25A6,SAMM50,BID,BAX,TOMM70A,MFN2,PMPCB,TOMM40,TIMM44,SH3GLB1,TRNT1,FIS1,GFER,MTX2,HSPA4,MIPEP,TOMM22,YWHAZ,PMPCA
GO: Biological Process	GO:0043414	macromolecule methylation	0.006509	46	161	RNMT,MBD4,ASH2L,ATRX,BHMT,MLL4,PRMT3,LCMT1,MTA2,DNMT1,DNMT3A,RAB3D,CTR9,WDR61,WDR82,ETF1,SETD7,GNAS,PRMT5,CTCF,CARM1,GSPT1,PRMT1,ILF3,MTR,MECP2,MEN1,METTL1,MGMT,SMYD3,PIK3CA,PRMT10,RBBP5,NTMT1,RAB6A,RNF20,MEPCE,SMARCA4,MPHOSPH8,NSUN2,KDM1A,MLL2,SETD3,FTSJD2,USP7,CXXC1
GO: Biological Process	GO:0006022	aminoglycan metabolic process	0.006509	46	161	B3GAT3,ARSB,BGN,GLCE,CD44,CHI3L1,CHIT1,SPOCK2,CTBS,VCAN,CSPG4,DCN,GPC4,FUCA1,FMOD,GLB1,GNS,GALNS,ITIH5,GUSB,AGRN,GPC1,HEXA,HEXB,IDS,HSPG2,ITIH3,ITIH2,ITIH1,ITIH4,LUM,OMD,OGN,NAGLU,NFKB1,CHID1,MAMDC2,CSGALNACT2,PRELP,PDGFRB,SGSH,IMPAD1,HABP4,UGDH,GXYLT1,PGLYRP2
GO: Biological Process	GO:0009260	ribonucleotide biosynthetic process	0.006527	67	250	ABCA1,ACACA,ADCY3,ADK,ADSL,ADSS,ADSSL1,AK2,AK1,ALDOA,GMPS,AMPD3,PAPSS2,PAPSS1,AMPD2,APOE,APRT,ATP1A3,ATP1A1,ATP1A2,ATIC,ATP5C1,ATP5A1,ATP2B4,ATP2A3,ATP2A2,ATP2B1,ATP1B1,ATP5J,PPCDC,SLC25A13,CTPS1,AKAP12,DPYD,PTK2B,COASY,CAP2,CAP1,GNAS,GNAI2,GNAI3,GART,GBAS,GUK1,GUCY1B3,ATP5L,AK3,PAICS,HPRT1,IMPDH2,IMPDH1,CTPS2,NME7,NF1,NME2,NME3,PPAT,PRPS1,PRKCA,PFAS,RP2,PRPS2,PID1,PANK4,UPP1,UMPS,ADNP
GO: Biological Process	GO:0023056	positive regulation of signaling	0.006568	218	930	RIPK1,ADA,TRADD,PARP1,MBD2,AGT,AKT2,SPAG9,ARRB1,ARRB2,ATM,BID,BAK1,BAX,C1QBP,C5,CAMK2D,LSM14A,CBL,CAV1,CASP1,CASP8,CAT,LAMTOR3,PRKD2,AKR1C3,CDC42,CDK1,CD81,CD74,CD44,BCLAF1,CHI3L1,USP34,PTPLAD1,CCR1,COL1A1,CLU,HDAC6,DNM1L,CTNNA1,TAOK3,SORBS3,CTNNB1,CRLF3,UBR5,MAPK14,CSNK2B,CSPG4,CSK,LRRK2,DDX5,DAPK3,MAPKAPK2,DAB2,CYLD,ECE1,ECM1,AKAP12,DOCK2,CDC73,EGFR,PTK2B,FGR,MPP7,MALT1,ERBB2,F2,PDCD10,MTOR,MAP…
GO: Biological Process	GO:0051918	negative regulation of fibrinolysis	0.006623	6	10	CPB2,F2,HRG,SERPINF2,PLG,THBS1
GO: Biological Process	GO:0070935	3'-UTR-mediated mRNA stabilization	0.006623	6	10	RBM10,MAPK14,MAPKAPK2,ELAVL1,HNRNPA0,TARDBP
GO: Biological Process	GO:0009180	purine ribonucleoside diphosphate biosynthetic process	0.006623	6	10	AK2,AK1,ATP5C1,ATP5A1,GUK1,AK3
GO: Biological Process	GO:0048261	negative regulation of receptor-mediated endocytosis	0.006623	6	10	MTMR2,APOC3,APOC2,ARF6,PICALM,RAC1
GO: Biological Process	GO:0046113	nucleobase catabolic process	0.006623	6	10	CRMP1,DPYSL3,DPYSL2,DPYD,DPYSL4,ALDH6A1
GO: Biological Process	GO:0009136	purine nucleoside diphosphate biosynthetic process	0.006623	6	10	AK2,AK1,ATP5C1,ATP5A1,GUK1,AK3
GO: Biological Process	GO:0006558	L-phenylalanine metabolic process	0.006623	6	10	CCBL1,FAH,GSTZ1,PCBD1,QDPR,SPR
GO: Biological Process	GO:0019471	4-hydroxyproline metabolic process	0.006623	6	10	P4HA2,ALDH4A1,GOT2,P4HA1,P4HB,EGLN1
GO: Biological Process	GO:0039529	RIG-I signaling pathway	0.006623	6	10	C1QBP,LSM14A,MAVS,ZC3HAV1,DDX60,DDX58
GO: Biological Process	GO:0017157	regulation of exocytosis	0.006689	31	100	ABR,NAPA,SNAP23,UNC13D,RAB9A,RAB3D,FGR,FES,SERPINA10,HMOX1,ZP4,LYN,NSF,MYO5A,NCAM1,SEPT5,PRKCA,PFN2,PDPK1,PLD2,EXOC2,RALB,RALA,RAB27A,STXBP2,STXBP1,STXBP3,SYK,RAB2B,ZP2,PLCB1
GO: Biological Process	GO:0033143	regulation of intracellular steroid hormone receptor signaling pathway	0.006751	18	50	ARRB2,CALR,KANK2,HDAC6,DDX5,DAB2,CYP7B1,CARM1,DDX17,PARK7,STRN3,PAK1,MED1,PHB,SMARCA4,SRC,UBE2I,MLL2
GO: Biological Process	GO:0030301	cholesterol transport	0.006805	22	65	ABCA1,APOB,APOA4,APOA2,APOE,APOC3,APOC2,CAV1,CETP,CLU,VPS4B,LRP1,MSR1,NPC1,NFKB1,PON1,APOM,SOAT1,STX12,SCP2,LAMTOR1,NR1H2
GO: Biological Process	GO:0033135	regulation of peptidyl-serine phosphorylation	0.006805	22	65	AKT1,AKT2,ARAF,ARRB1,BAK1,BAX,BCL2,CAV1,PRKD2,CDC42,CD44,INPP5K,PPM1F,HCLS1,SPTBN4,MIF,PAK1,PRKD1,PIK3CA,TBK1,PHIP,DOCK7
GO: Biological Process	GO:0015918	sterol transport	0.006805	22	65	ABCA1,APOB,APOA4,APOA2,APOE,APOC3,APOC2,CAV1,CETP,CLU,VPS4B,LRP1,MSR1,NPC1,NFKB1,PON1,APOM,SOAT1,STX12,SCP2,LAMTOR1,NR1H2
GO: Biological Process	GO:2000377	regulation of reactive oxygen species metabolic process	0.006805	22	65	ACP5,RIPK1,AGT,AATF,AKR1C3,HDAC6,MAPK14,CRYAB,PTK2B,F2,GSTP1,FBLN5,GRB2,PDK3,PDGFRB,RAC1,RAC2,TGFBR2,THBS1,PID1,PRDX2,SYK
GO: Biological Process	GO:0070389	chaperone cofactor-dependent protein refolding	0.00692	4	5	BAG1,PTGES3,DNAJB1,ST13
GO: Biological Process	GO:0002901	mature B cell apoptotic process	0.00692	4	5	ADA,CD74,CD44,MIF
GO: Biological Process	GO:0071763	nuclear membrane organization	0.00692	4	5	BAX,TOR1AIP1,TOR1A,TOR1B
[truncated: 6,900 more rows]

## Sheet: CC
Supplementary Data 3b: Cellular component analysis of homologous human gene symbols
[truncated: 1,030 more rows]

[truncated: 1 more sheets: KEGG]
