# Supplementary material for: Unravelling the proteome of adult rhesus monkey ovaries
Source: Royal Society of Chemistry journal article supplement (doi:10.1039/c3mb70312f), 2013-11-25
Supplement: c3mb70312f_4.xlsx [file c3mb70312f_4.xlsx]

## Sheet: Antibodies
Supplementary Data 4. Primary antibodies used in immunohistochemistry studies
Protein	Company	Catalog number of antibody	Location
ARHGDIA	santa cruz biotechnology	sc-360	granulosa cell and oocyte cytoplasm
HSP90B1	abgent	AP11926c	granulosa cell and oocyte cytoplasm
FSCN1	santa cruz biotechnology	sc-28265	granulosa cell cytoplasm
ALDH1A2	abcam	ab75674	oocyte cytoplasm
BCAS2	abcam	ab85708	oocyte cytoplasm
CUL1	abcam	ab75812	oocyte cytoplasm
DNM1L	proteintech	12957-1-AP	oocyte cytoplasm
DPYSL2	abcam	ab36201	oocyte cytoplasm
FKBP4	abnova	H00002288-M01	oocyte cytoplasm
GLOD4	proteintech	16788-1-AP	oocyte cytoplasm
GNA11	santa cruz biotechnology	sc-392	oocyte cytoplasm
GNPDA1	abcam	ab72336	oocyte cytoplasm
LCP1	proteintech	13025-1-AP	oocyte cytoplasm
TALDO1	abgent	AP6679c	oocyte cytoplasm
PRDX4	abcam	ab59542	oocyte nuclear and cytoplasm
PSMC5	abcam	ab70832	oocyte nuclear and cytoplasm
RBBP7	abcam	ab3535	oocyte nuclear and cytoplasm
HSPA4L	santa cruz biotechnology	sc-6239	oocyte nuclear and cytoplasm, granulosa cell nuclear
MMP9	cell signaling	3852	oocyte nuclear and cytoplasm, granulosa cell nuclear
XPO1	santa cruz biotechnology	sc-5595	oocyte nuclear and cytoplasm, granulosa cell nuclear
