# Supplementary material for: Unravelling the proteome of adult rhesus monkey ovaries
Source: Royal Society of Chemistry journal article supplement (doi:10.1039/c3mb70312f), 2013-11-25
Supplement: c3mb70312f_5.xlsx [file c3mb70312f_5.xlsx]

## Sheet: High abundance proteins
Supplementary Data 5. High abundance proteins of the present proteome
id	Rhesus Protein ID	iBAQ	Human Gene Name	Human Description	Homology Type
891	ENSMMUP00000005100	7359000000	ALB	albumin [Source:HGNC Symbol;Acc:399]	ortholog_one2one
1674	ENSMMUP00000009222	7307300000	ACTC1	actin, alpha, cardiac muscle 1 [Source:HGNC Symbol;Acc:143]	ortholog_one2one
2545	ENSMMUP00000014597	6535600000	ACTG1	actin, gamma 1 [Source:HGNC Symbol;Acc:144]	ortholog_one2one
1192	ENSMMUP00000006757	4697800000	PEBP1	phosphatidylethanolamine binding protein 1 [Source:HGNC Symbol;Acc:8630]	ortholog_one2one
731	ENSMMUP00000004265	2663000000	VIM	vimentin [Source:HGNC Symbol;Acc:12692]	ortholog_one2one
4635	ENSMMUP00000026879	2360100000	SERPINA1	serpin peptidase inhibitor, clade A (alpha-1 antiproteinase, antitrypsin), member 1 [Source:HGNC Symbol;Acc:8941]	ortholog_one2one
1758	ENSMMUP00000009688	2287800000	IGHM	immunoglobulin heavy constant mu [Source:HGNC Symbol;Acc:5541]	ortholog_one2one
642	ENSMMUP00000039194	2256600000	HIST2H2BF	histone cluster 2, H2bf [Source:HGNC Symbol;Acc:24700]	ortholog_one2one
5529	ENSMMUP00000036343	2207600000	IGKV1-5	immunoglobulin kappa variable 1-5 [Source:HGNC Symbol;Acc:5741]	ortholog_one2one
3054	ENSMMUP00000017493	2116200000	ALDH1A1	aldehyde dehydrogenase 1 family, member A1 [Source:HGNC Symbol;Acc:402]	ortholog_one2one
3892	ENSMMUP00000022354	2078300000	LUM	lumican [Source:HGNC Symbol;Acc:6724]	ortholog_one2one
2131	ENSMMUP00000012054	1965200000	ANXA5	annexin A5 [Source:HGNC Symbol;Acc:543]	ortholog_one2one
2771	ENSMMUP00000015737	1881900000	ANXA2	annexin A2 [Source:HGNC Symbol;Acc:537]	ortholog_one2one
3824	ENSMMUP00000021922	1795100000	TTR	transthyretin [Source:HGNC Symbol;Acc:12405]	ortholog_one2one
4472	ENSMMUP00000025789	1769200000	GSTM4	glutathione S-transferase mu 4 [Source:HGNC Symbol;Acc:4636]	ortholog_one2one
3421	ENSMMUP00000019544	1730500000	RPLP1	ribosomal protein, large, P1 [Source:HGNC Symbol;Acc:10372]	ortholog_one2one
3710	ENSMMUP00000021209	1631800000	APOA4	apolipoprotein A-IV [Source:HGNC Symbol;Acc:602]	ortholog_one2one
3769	ENSMMUP00000021602	1374400000	MYL9	myosin, light chain 9, regulatory [Source:HGNC Symbol;Acc:15754]	ortholog_one2one
4881	ENSMMUP00000028500	1267400000	PRELP	proline/arginine-rich end leucine-rich repeat protein [Source:HGNC Symbol;Acc:9357]	ortholog_one2one
1084	ENSMMUP00000006166	1262300000	OGN	osteoglycin [Source:HGNC Symbol;Acc:8126]	ortholog_one2one
2077	ENSMMUP00000011690	1198500000	TF	transferrin [Source:HGNC Symbol;Acc:11740]	ortholog_one2one
5659	ENSMMUP00000039421	1127400000	MYL6	myosin, light chain 6, alkali, smooth muscle and non-muscle [Source:HGNC Symbol;Acc:7587]	ortholog_one2one
378	ENSMMUP00000002283	1028500000	SOD1	superoxide dismutase 1, soluble [Source:HGNC Symbol;Acc:11179]	ortholog_one2one
833	ENSMMUP00000004838	1016000000	HNRNPA2B1	heterogeneous nuclear ribonucleoprotein A2/B1 [Source:HGNC Symbol;Acc:5033]	ortholog_one2one
113	ENSMMUP00000000663	995670000	FABP5	fatty acid binding protein 5 (psoriasis-associated) [Source:HGNC Symbol;Acc:3560]	ortholog_one2one
1024	ENSMMUP00000005869	974650000	CALR	calreticulin [Source:HGNC Symbol;Acc:1455]	ortholog_one2one
2427	ENSMMUP00000013841	931070000	PGAM1	phosphoglycerate mutase 1 (brain) [Source:HGNC Symbol;Acc:8888]	apparent_ortholog_one2one
301	ENSMMUP00000001807	925010000	ACTBL2	actin, beta-like 2 [Source:HGNC Symbol;Acc:17780]	ortholog_one2one
1541	ENSMMUP00000008547	908110000	YWHAZ	tyrosine 3-monooxygenase/tryptophan 5-monooxygenase activation protein, zeta polypeptide [Source:HGNC Symbol;Acc:12855]	ortholog_one2one
5107	ENSMMUP00000029862	880190000	HSP90AB1	heat shock protein 90kDa alpha (cytosolic), class B member 1 [Source:HGNC Symbol;Acc:5258]	ortholog_one2one
4471	ENSMMUP00000025788	858170000	GSTM4	glutathione S-transferase mu 4 [Source:HGNC Symbol;Acc:4636]	ortholog_one2one
4301	ENSMMUP00000024880	845580000	HRG	histidine-rich glycoprotein [Source:HGNC Symbol;Acc:5181]	ortholog_one2one
138	ENSMMUP00000000842	841480000	SERPINC1	serpin peptidase inhibitor, clade C (antithrombin), member 1 [Source:HGNC Symbol;Acc:775]	ortholog_one2one
818	ENSMMUP00000004748	830770000	LGALS3	lectin, galactoside-binding, soluble, 3 [Source:HGNC Symbol;Acc:6563]	ortholog_one2one
4224	ENSMMUP00000024369	815720000	GSTP1	glutathione S-transferase pi 1 [Source:HGNC Symbol;Acc:4638]	ortholog_one2one
67	ENSMMUP00000000392	793500000	RBP1	retinol binding protein 1, cellular [Source:HGNC Symbol;Acc:9919]	ortholog_one2one
471	ENSMMUP00000002806	784840000	ZP4	zona pellucida glycoprotein 4 [Source:HGNC Symbol;Acc:15770]	ortholog_one2one
321	ENSMMUP00000001933	784450000	HIST3H2A	histone cluster 3, H2a [Source:HGNC Symbol;Acc:20507]	apparent_ortholog_one2one
4374	ENSMMUP00000025247	783270000	CTSB	cathepsin B [Source:HGNC Symbol;Acc:2527]	ortholog_one2one
126	ENSMMUP00000000736	748530000	COL6A1	collagen, type VI, alpha 1 [Source:HGNC Symbol;Acc:2211]	ortholog_one2one
3220	ENSMMUP00000018478	737320000	COL6A3	collagen, type VI, alpha 3 [Source:HGNC Symbol;Acc:2213]	ortholog_one2one
1818	ENSMMUP00000010086	715610000	SERPINH1	serpin peptidase inhibitor, clade H (heat shock protein 47), member 1, (collagen binding protein 1) [Source:HGNC Symbol;Acc:1546]	ortholog_one2one
903	ENSMMUP00000005169	711960000	CTSD	cathepsin D [Source:HGNC Symbol;Acc:2529]	ortholog_one2one
3944	ENSMMUP00000022609	692380000	LGALS1	lectin, galactoside-binding, soluble, 1 [Source:HGNC Symbol;Acc:6561]	ortholog_one2one
2691	ENSMMUP00000015300	682670000	S100A10	S100 calcium binding protein A10 [Source:HGNC Symbol;Acc:10487]	apparent_ortholog_one2one
1893	ENSMMUP00000010527	675770000	GSTM3	glutathione S-transferase mu 3 (brain) [Source:HGNC Symbol;Acc:4635]	ortholog_one2one
1866	ENSMMUP00000017056	675050000	HNRNPA1L2	heterogeneous nuclear ribonucleoprotein A1-like 2 [Source:HGNC Symbol;Acc:27067]	ortholog_one2one
5220	ENSMMUP00000035113	654590000	GC	group-specific component (vitamin D binding protein) [Source:HGNC Symbol;Acc:4187]	ortholog_one2one
364	ENSMMUP00000002187	651280000	GLO1	glyoxalase I [Source:HGNC Symbol;Acc:4323]	ortholog_one2one
595	ENSMMUP00000003491	633670000	COL14A1	collagen, type XIV, alpha 1 [Source:HGNC Symbol;Acc:2191]	ortholog_one2one
3903	ENSMMUP00000022419	633610000	LCP1	lymphocyte cytosolic protein 1 (L-plastin) [Source:HGNC Symbol;Acc:6528]	ortholog_one2one
4004	ENSMMUP00000035311	620010000	CALM3	calmodulin 3 (phosphorylase kinase, delta) [Source:HGNC Symbol;Acc:1449]	ortholog_one2one
3701	ENSMMUP00000021173	616600000	LMNA	lamin A/C [Source:HGNC Symbol;Acc:6636]	ortholog_one2one
1473	ENSMMUP00000008176	589150000	PRDX1	peroxiredoxin 1 [Source:HGNC Symbol;Acc:9352]	ortholog_one2one
4771	ENSMMUP00000027706	586730000	ANXA6	annexin A6 [Source:HGNC Symbol;Acc:544]	ortholog_one2one
370	ENSMMUP00000002254	580500000	PDIA3	protein disulfide isomerase family A, member 3 [Source:HGNC Symbol;Acc:4606]	ortholog_one2one
2287	ENSMMUP00000012976	559980000	MDH2	malate dehydrogenase 2, NAD (mitochondrial) [Source:HGNC Symbol;Acc:6971]	ortholog_one2one
228	ENSMMUP00000001319	533840000	ALDOA	aldolase A, fructose-bisphosphate [Source:HGNC Symbol;Acc:414]	ortholog_one2one
2234	ENSMMUP00000012585	524620000	CALU	calumenin [Source:HGNC Symbol;Acc:1458]	ortholog_one2one
3068	ENSMMUP00000017596	512470000	PRDX5	peroxiredoxin 5 [Source:HGNC Symbol;Acc:9355]	ortholog_one2one
5023	ENSMMUP00000029385	511940000	COL6A2	collagen, type VI, alpha 2 [Source:HGNC Symbol;Acc:2212]	ortholog_one2one
1428	ENSMMUP00000007917	488640000	EHD2	EH-domain containing 2 [Source:HGNC Symbol;Acc:3243]	ortholog_one2one
2306	ENSMMUP00000013065	486730000	HINT1	histidine triad nucleotide binding protein 1 [Source:HGNC Symbol;Acc:4912]	apparent_ortholog_one2one
2052	ENSMMUP00000011500	474670000	PRDX6	peroxiredoxin 6 [Source:HGNC Symbol;Acc:16753]	ortholog_one2one
3318	ENSMMUP00000018994	469070000	PGRMC1	progesterone receptor membrane component 1 [Source:HGNC Symbol;Acc:16090]	ortholog_one2one
1526	ENSMMUP00000008470	466710000	ACTN4	actinin, alpha 4 [Source:HGNC Symbol;Acc:166]	ortholog_one2one
1147	ENSMMUP00000006484	465430000	HNRNPL	heterogeneous nuclear ribonucleoprotein L [Source:HGNC Symbol;Acc:5045]	ortholog_one2one
2355	ENSMMUP00000013336	463620000	CYB5R3	cytochrome b5 reductase 3 [Source:HGNC Symbol;Acc:2873]	ortholog_one2one
1221	ENSMMUP00000006906	455870000	HSPA5	heat shock 70kDa protein 5 (glucose-regulated protein, 78kDa) [Source:HGNC Symbol;Acc:5238]	ortholog_one2one
633	ENSMMUP00000003717	443880000	PFN1	profilin 1 [Source:HGNC Symbol;Acc:8881]	ortholog_one2one
3233	ENSMMUP00000018556	433700000	CAV1	caveolin 1, caveolae protein, 22kDa [Source:HGNC Symbol;Acc:1527]	ortholog_one2one
2388	ENSMMUP00000013585	431050000	MYH11	myosin, heavy chain 11, smooth muscle [Source:HGNC Symbol;Acc:7569]	ortholog_one2one
2005	ENSMMUP00000011186	424360000	SET	SET nuclear oncogene [Source:HGNC Symbol;Acc:10760]	ortholog_one2one
4482	ENSMMUP00000025827	415600000	ABHD14B	abhydrolase domain containing 14B [Source:HGNC Symbol;Acc:28235]	ortholog_one2one
4882	ENSMMUP00000028501	415250000	FMOD	fibromodulin [Source:HGNC Symbol;Acc:3774]	ortholog_one2one
5273	ENSMMUP00000030897	413560000	HSP90B1	heat shock protein 90kDa beta (Grp94), member 1 [Source:HGNC Symbol;Acc:12028]	ortholog_one2one
1347	ENSMMUP00000007512	411520000	PRDX2	peroxiredoxin 2 [Source:HGNC Symbol;Acc:9353]	ortholog_one2one
4854	ENSMMUP00000032167	404380000	CLU	clusterin [Source:HGNC Symbol;Acc:2095]	ortholog_one2one
2960	ENSMMUP00000016899	404000000	PDIA6	protein disulfide isomerase family A, member 6 [Source:HGNC Symbol;Acc:30168]	ortholog_one2one
5561	ENSMMUP00000037015	398930000	LDHA	lactate dehydrogenase A [Source:HGNC Symbol;Acc:6535]	ortholog_one2one
3031	ENSMMUP00000017317	392810000	GDI2	GDP dissociation inhibitor 2 [Source:HGNC Symbol;Acc:4227]	ortholog_one2one
2023	ENSMMUP00000011316	390690000	ARL6IP5	ADP-ribosylation-like factor 6 interacting protein 5 [Source:HGNC Symbol;Acc:16937]	ortholog_one2one
2805	ENSMMUP00000015958	389990000	TUBB4B	tubulin, beta 4B class IVb [Source:HGNC Symbol;Acc:20771]	ortholog_one2one
3308	ENSMMUP00000018959	388360000	TKT	transketolase [Source:HGNC Symbol;Acc:11834]	ortholog_one2one
3453	ENSMMUP00000019703	386460000	ACTR3	ARP3 actin-related protein 3 homolog (yeast) [Source:HGNC Symbol;Acc:170]	ortholog_one2one
1956	ENSMMUP00000010873	384300000	PRDX3	peroxiredoxin 3 [Source:HGNC Symbol;Acc:9354]	ortholog_one2one
2482	ENSMMUP00000014213	381240000	HNRNPH1	heterogeneous nuclear ribonucleoprotein H1 (H) [Source:HGNC Symbol;Acc:5041]	ortholog_one2one
1106	ENSMMUP00000006240	379130000	HSPA8	heat shock 70kDa protein 8 [Source:HGNC Symbol;Acc:5241]	ortholog_one2one
1182	ENSMMUP00000006688	373770000	PHPT1	phosphohistidine phosphatase 1 [Source:HGNC Symbol;Acc:30033]	ortholog_one2one
4825	ENSMMUP00000028067	371580000	FGG	fibrinogen gamma chain [Source:HGNC Symbol;Acc:3694]	ortholog_one2one
5451	ENSMMUP00000033902	368040000	ARHGDIA	Rho GDP dissociation inhibitor (GDI) alpha [Source:HGNC Symbol;Acc:678]	ortholog_one2one
2997	ENSMMUP00000017095	366710000	GSN	gelsolin [Source:HGNC Symbol;Acc:4620]	ortholog_one2one
3211	ENSMMUP00000018439	361490000	HNRNPD	heterogeneous nuclear ribonucleoprotein D (AU-rich element RNA binding protein 1, 37kDa) [Source:HGNC Symbol;Acc:5036]	ortholog_one2one
3601	ENSMMUP00000020537	350520000	MSN	moesin [Source:HGNC Symbol;Acc:7373]	ortholog_one2one
612	ENSMMUP00000003600	348900000	CAPG	capping protein (actin filament), gelsolin-like [Source:HGNC Symbol;Acc:1474]	ortholog_one2one
819	ENSMMUP00000004753	345250000	ATP5A1	ATP synthase, H+ transporting, mitochondrial F1 complex, alpha subunit 1, cardiac muscle [Source:HGNC Symbol;Acc:823]	ortholog_one2one
5699	ENSMMUP00000040537	344150000	CDC42	cell division cycle 42 [Source:HGNC Symbol;Acc:1736]	ortholog_one2one
1118	ENSMMUP00000006294	341280000	SEPT2	septin 2 [Source:HGNC Symbol;Acc:7729]	ortholog_one2one
3575	ENSMMUP00000020332	330270000	ASAH1	N-acylsphingosine amidohydrolase (acid ceramidase) 1 [Source:HGNC Symbol;Acc:735]	ortholog_one2one
4390	ENSMMUP00000025346	327800000	DPYSL3	dihydropyrimidinase-like 3 [Source:HGNC Symbol;Acc:3015]	ortholog_one2one
5267	ENSMMUP00000030856	323780000	KHDRBS1	KH domain containing, RNA binding, signal transduction associated 1 [Source:HGNC Symbol;Acc:18116]	ortholog_one2one
5180	ENSMMUP00000030320	320970000	PGD	phosphogluconate dehydrogenase [Source:HGNC Symbol;Acc:8891]	ortholog_one2one
3698	ENSMMUP00000021152	320680000	IDH1	isocitrate dehydrogenase 1 (NADP+), soluble [Source:HGNC Symbol;Acc:5382]	ortholog_one2one
2984	ENSMMUP00000017012	316800000	GPX1	glutathione peroxidase 1 [Source:HGNC Symbol;Acc:4553]	ortholog_one2one
436	ENSMMUP00000002591	314320000	NME2	NME/NM23 nucleoside diphosphate kinase 2 [Source:HGNC Symbol;Acc:7850]	ortholog_one2one
3131	ENSMMUP00000017981	312290000	FLNA	filamin A, alpha [Source:HGNC Symbol;Acc:3754]	ortholog_one2one
1108	ENSMMUP00000006251	312280000	TAGLN2	transgelin 2 [Source:HGNC Symbol;Acc:11554]	ortholog_one2one
2848	ENSMMUP00000016217	307500000	MPST	mercaptopyruvate sulfurtransferase [Source:HGNC Symbol;Acc:7223]	ortholog_one2one
223	ENSMMUP00000001290	304220000	WDR1	WD repeat domain 1 [Source:HGNC Symbol;Acc:12754]	ortholog_one2one
4823	ENSMMUP00000028060	303370000	FGB	fibrinogen beta chain [Source:HGNC Symbol;Acc:3662]	ortholog_one2one
4847	ENSMMUP00000028260	303330000	KCTD12	potassium channel tetramerisation domain containing 12 [Source:HGNC Symbol;Acc:14678]	ortholog_one2one
5463	ENSMMUP00000034109	301300000	DDX39B	DEAD (Asp-Glu-Ala-Asp) box polypeptide 39B [Source:HGNC Symbol;Acc:13917]	ortholog_one2one
5601	ENSMMUP00000037885	298090000	RPN2	ribophorin II [Source:HGNC Symbol;Acc:10382]	ortholog_one2one
2466	ENSMMUP00000014104	294630000	ACTN1	actinin, alpha 1 [Source:HGNC Symbol;Acc:163]	ortholog_one2one
3593	ENSMMUP00000020467	290850000	BLVRB	biliverdin reductase B (flavin reductase (NADPH)) [Source:HGNC Symbol;Acc:1063]	ortholog_one2one
1392	ENSMMUP00000007737	288240000	GPI	glucose-6-phosphate isomerase [Source:HGNC Symbol;Acc:4458]	ortholog_one2one
5167	ENSMMUP00000030260	288050000	TPT1	tumor protein, translationally-controlled 1 [Source:HGNC Symbol;Acc:12022]	ortholog_one2one
424	ENSMMUP00000002526	287820000	GNB1	guanine nucleotide binding protein (G protein), beta polypeptide 1 [Source:HGNC Symbol;Acc:4396]	ortholog_one2one
4296	ENSMMUP00000024832	287530000	HNRNPK	heterogeneous nuclear ribonucleoprotein K [Source:HGNC Symbol;Acc:5044]	ortholog_one2one
4361	ENSMMUP00000025177	283810000	SFPQ	splicing factor proline/glutamine-rich [Source:HGNC Symbol;Acc:10774]	ortholog_one2one
828	ENSMMUP00000004809	277710000	GNB2L1	guanine nucleotide binding protein (G protein), beta polypeptide 2-like 1 [Source:HGNC Symbol;Acc:4399]	apparent_ortholog_one2one
3997	ENSMMUP00000022942	277020000	UBA1	ubiquitin-like modifier activating enzyme 1 [Source:HGNC Symbol;Acc:12469]	ortholog_one2one
2854	ENSMMUP00000016246	273770000	CANX	calnexin [Source:HGNC Symbol;Acc:1473]	ortholog_one2one
4351	ENSMMUP00000025143	273690000	APEX1	APEX nuclease (multifunctional DNA repair enzyme) 1 [Source:HGNC Symbol;Acc:587]	ortholog_one2one
1115	ENSMMUP00000006280	265640000	SRSF1	serine/arginine-rich splicing factor 1 [Source:HGNC Symbol;Acc:10780]	ortholog_one2one
4749	ENSMMUP00000027540	263750000	RAN	RAN, member RAS oncogene family [Source:HGNC Symbol;Acc:9846]	ortholog_one2one
4321	ENSMMUP00000024964	263110000	CKB	creatine kinase, brain [Source:HGNC Symbol;Acc:1991]	ortholog_one2one
2522	ENSMMUP00000014432	262400000	SRSF7	serine/arginine-rich splicing factor 7 [Source:HGNC Symbol;Acc:10789]	ortholog_one2one
5134	ENSMMUP00000030049	260300000	ABRACL	ABRA C-terminal like [Source:HGNC Symbol;Acc:21230]	ortholog_one2one
3671	ENSMMUP00000020982	260020000	MGST3	microsomal glutathione S-transferase 3 [Source:HGNC Symbol;Acc:7064]	ortholog_one2one
4598	ENSMMUP00000026582	257540000	VCP	valosin containing protein [Source:HGNC Symbol;Acc:12666]	ortholog_one2one
1301	ENSMMUP00000007315	255400000	CP	ceruloplasmin (ferroxidase) [Source:HGNC Symbol;Acc:2295]	ortholog_one2one
115	ENSMMUP00000000697	254020000	CORO1C	coronin, actin binding protein, 1C [Source:HGNC Symbol;Acc:2254]	ortholog_one2one
3770	ENSMMUP00000021615	253490000	PTBP1	polypyrimidine tract binding protein 1 [Source:HGNC Symbol;Acc:9583]	ortholog_one2one
2035	ENSMMUP00000011397	250700000	VDAC2	voltage-dependent anion channel 2 [Source:HGNC Symbol;Acc:12672]	apparent_ortholog_one2one
3150	ENSMMUP00000018100	249370000	PTGES3	prostaglandin E synthase 3 (cytosolic) [Source:HGNC Symbol;Acc:16049]	apparent_ortholog_one2one
563	ENSMMUP00000003264	246730000	CAT	catalase [Source:HGNC Symbol;Acc:1516]	ortholog_one2one
5401	ENSMMUP00000032564	245860000	UQCRC2	ubiquinol-cytochrome c reductase core protein II [Source:HGNC Symbol;Acc:12586]	ortholog_one2one
4193	ENSMMUP00000024143	245820000	RCN1	reticulocalbin 1, EF-hand calcium binding domain [Source:HGNC Symbol;Acc:9934]	ortholog_one2one
373	ENSMMUP00000002263	243520000	SH3BGRL	SH3 domain binding glutamic acid-rich protein like [Source:HGNC Symbol;Acc:10823]	ortholog_one2one
5123	ENSMMUP00000029973	241990000	EEF2	eukaryotic translation elongation factor 2 [Source:HGNC Symbol;Acc:3214]	ortholog_one2one
412	ENSMMUP00000036966	240610000	XRCC6	X-ray repair complementing defective repair in Chinese hamster cells 6 [Source:HGNC Symbol;Acc:4055]	ortholog_one2one
3964	ENSMMUP00000022730	239460000	PPP1CA	protein phosphatase 1, catalytic subunit, alpha isozyme [Source:HGNC Symbol;Acc:9281]	ortholog_one2one
2921	ENSMMUP00000016637	239450000	ANXA1	annexin A1 [Source:HGNC Symbol;Acc:533]	ortholog_one2one
3893	ENSMMUP00000022356	239000000	DCN	decorin [Source:HGNC Symbol;Acc:2705]	ortholog_one2one
3840	ENSMMUP00000022035	237770000	COX6B1	cytochrome c oxidase subunit VIb polypeptide 1 (ubiquitous) [Source:HGNC Symbol;Acc:2280]	ortholog_one2one
4784	ENSMMUP00000027771	236660000	HNRNPU	heterogeneous nuclear ribonucleoprotein U (scaffold attachment factor A) [Source:HGNC Symbol;Acc:5048]	ortholog_one2one
1442	ENSMMUP00000008018	235790000	MYH9	myosin, heavy chain 9, non-muscle [Source:HGNC Symbol;Acc:7579]	ortholog_one2one
2703	ENSMMUP00000015381	234840000	SERPINB9	serpin peptidase inhibitor, clade B (ovalbumin), member 9 [Source:HGNC Symbol;Acc:8955]	ortholog_one2one
4305	ENSMMUP00000024898	234670000	TGM2	transglutaminase 2 (C polypeptide, protein-glutamine-gamma-glutamyltransferase) [Source:HGNC Symbol;Acc:11778]	ortholog_one2one
5461	ENSMMUP00000034070	234260000	CLIC1	chloride intracellular channel 1 [Source:HGNC Symbol;Acc:2062]	ortholog_one2one
2142	ENSMMUP00000012107	233760000	P4HB	prolyl 4-hydroxylase, beta polypeptide [Source:HGNC Symbol;Acc:8548]	ortholog_one2one
5500	ENSMMUP00000035519	233170000	FSCN1	fascin homolog 1, actin-bundling protein (Strongylocentrotus purpuratus) [Source:HGNC Symbol;Acc:11148]	ortholog_one2one
2418	ENSMMUP00000013774	232320000	CLTC	clathrin, heavy chain (Hc) [Source:HGNC Symbol;Acc:2092]	ortholog_one2one
4325	ENSMMUP00000024982	232230000	UBE2L3	ubiquitin-conjugating enzyme E2L 3 [Source:HGNC Symbol;Acc:12488]	ortholog_one2one
1360	ENSMMUP00000007600	232200000	APMAP	adipocyte plasma membrane associated protein [Source:HGNC Symbol;Acc:13238]	ortholog_one2one
1464	ENSMMUP00000008104	230930000	MDH1	malate dehydrogenase 1, NAD (soluble) [Source:HGNC Symbol;Acc:6970]	ortholog_one2one
1642	ENSMMUP00000009048	228710000	AKR7A3	aldo-keto reductase family 7, member A3 (aflatoxin aldehyde reductase) [Source:HGNC Symbol;Acc:390]	ortholog_one2one
5028	ENSMMUP00000029418	226730000	SURF4	surfeit 4 [Source:HGNC Symbol;Acc:11476]	ortholog_one2one
2115	ENSMMUP00000011949	226200000	MIF	macrophage migration inhibitory factor (glycosylation-inhibiting factor) [Source:HGNC Symbol;Acc:7097]	ortholog_one2one
4435	ENSMMUP00000025615	221880000	MAOB	monoamine oxidase B [Source:HGNC Symbol;Acc:6834]	ortholog_one2one
3774	ENSMMUP00000021644	220430000	CBX1	chromobox homolog 1 [Source:HGNC Symbol;Acc:1551]	apparent_ortholog_one2one
1542	ENSMMUP00000008550	218590000	ARPC3	actin related protein 2/3 complex, subunit 3, 21kDa [Source:HGNC Symbol;Acc:706]	ortholog_one2one
3609	ENSMMUP00000020564	215470000	CAPZA1	capping protein (actin filament) muscle Z-line, alpha 1 [Source:HGNC Symbol;Acc:1488]	ortholog_one2one
2628	ENSMMUP00000015052	215160000	SUB1	SUB1 homolog (S. cerevisiae) [Source:HGNC Symbol;Acc:19985]	apparent_ortholog_one2one
189	ENSMMUP00000001116	215080000	LMNB1	lamin B1 [Source:HGNC Symbol;Acc:6637]	ortholog_one2one
4586	ENSMMUP00000026481	214840000	GNAI2	guanine nucleotide binding protein (G protein), alpha inhibiting activity polypeptide 2 [Source:HGNC Symbol;Acc:4385]	ortholog_one2one
2376	ENSMMUP00000013494	213750000	PURA	purine-rich element binding protein A [Source:HGNC Symbol;Acc:9701]	ortholog_one2one
771	ENSMMUP00000004497	213730000	SSR4	signal sequence receptor, delta [Source:HGNC Symbol;Acc:11326]	ortholog_one2one
4716	ENSMMUP00000027334	212200000	CSRP1	cysteine and glycine-rich protein 1 [Source:HGNC Symbol;Acc:2469]	ortholog_one2one
5621	ENSMMUP00000038432	211930000	TMED2	transmembrane emp24 domain trafficking protein 2 [Source:HGNC Symbol;Acc:16996]	ortholog_one2one
4360	ENSMMUP00000025171	211300000	SEBOX	SEBOX homeobox [Source:HGNC Symbol;Acc:32942]	ortholog_one2one
5478	ENSMMUP00000034863	209950000	YWHAQ	tyrosine 3-monooxygenase/tryptophan 5-monooxygenase activation protein, theta polypeptide [Source:HGNC Symbol;Acc:12854]	ortholog_one2one
5104	ENSMMUP00000029834	209250000	SLC25A5	solute carrier family 25 (mitochondrial carrier; adenine nucleotide translocator), member 5 [Source:HGNC Symbol;Acc:10991]	ortholog_one2one
4144	ENSMMUP00000023812	207580000	GANAB	glucosidase, alpha; neutral AB [Source:HGNC Symbol;Acc:4138]	ortholog_one2one
1676	ENSMMUP00000009234	205400000	COTL1	coactosin-like 1 (Dictyostelium) [Source:HGNC Symbol;Acc:18304]	ortholog_one2one
141	ENSMMUP00000000870	204880000	SH3BGRL3	SH3 domain binding glutamic acid-rich protein like 3 [Source:HGNC Symbol;Acc:15568]	ortholog_one2one
2084	ENSMMUP00000011719	203470000	CNDP2	CNDP dipeptidase 2 (metallopeptidase M20 family) [Source:HGNC Symbol;Acc:24437]	ortholog_one2one
4348	ENSMMUP00000025131	203350000	BANF1	barrier to autointegration factor 1 [Source:HGNC Symbol;Acc:17397]	ortholog_one2one
2704	ENSMMUP00000015382	197310000	SERPINB1	serpin peptidase inhibitor, clade B (ovalbumin), member 1 [Source:HGNC Symbol;Acc:3311]	ortholog_one2one
3682	ENSMMUP00000021043	193900000	VAT1	vesicle amine transport protein 1 homolog (T. californica) [Source:HGNC Symbol;Acc:16919]	ortholog_one2one
1181	ENSMMUP00000023785	192530000	NCL	nucleolin [Source:HGNC Symbol;Acc:7667]	ortholog_one2one
1577	ENSMMUP00000008675	192470000	EEF1G	eukaryotic translation elongation factor 1 gamma [Source:HGNC Symbol;Acc:3213]	ortholog_one2one
3381	ENSMMUP00000019293	191870000	UQCRC1	ubiquinol-cytochrome c reductase core protein I [Source:HGNC Symbol;Acc:12585]	ortholog_one2one
4787	ENSMMUP00000027805	191550000	PPIB	peptidylprolyl isomerase B (cyclophilin B) [Source:HGNC Symbol;Acc:9255]	ortholog_one2one
322	ENSMMUP00000001942	191250000	ACO2	aconitase 2, mitochondrial [Source:HGNC Symbol;Acc:118]	ortholog_one2one
5473	ENSMMUP00000034457	191200000	PTRF	polymerase I and transcript release factor [Source:HGNC Symbol;Acc:9688]	ortholog_one2one
460	ENSMMUP00000002752	191200000	TAGLN	transgelin [Source:HGNC Symbol;Acc:11553]	ortholog_one2one
1617	ENSMMUP00000008891	190960000	CYP27A1	cytochrome P450, family 27, subfamily A, polypeptide 1 [Source:HGNC Symbol;Acc:2605]	ortholog_one2one
5076	ENSMMUP00000029685	187750000	LIPA	lipase A, lysosomal acid, cholesterol esterase [Source:HGNC Symbol;Acc:6617]	ortholog_one2one
5349	ENSMMUP00000031381	185320000	MT-CO2	mitochondrially encoded cytochrome c oxidase II [Source:HGNC Symbol;Acc:7421]	ortholog_one2one
3195	ENSMMUP00000018362	180300000	LGMN	legumain [Source:HGNC Symbol;Acc:9472]	ortholog_one2one
1576	ENSMMUP00000008669	179010000	C1QBP	complement component 1, q subcomponent binding protein [Source:HGNC Symbol;Acc:1243]	ortholog_one2one
2917	ENSMMUP00000016613	178470000	GPNMB	glycoprotein (transmembrane) nmb [Source:HGNC Symbol;Acc:4462]	ortholog_one2one
2621	ENSMMUP00000015009	176940000	RAP1B	RAP1B, member of RAS oncogene family [Source:HGNC Symbol;Acc:9857]	apparent_ortholog_one2one
2930	ENSMMUP00000016692	176120000	DPYSL2	dihydropyrimidinase-like 2 [Source:HGNC Symbol;Acc:3014]	ortholog_one2one
200	ENSMMUP00000001151	171220000	ANXA4	annexin A4 [Source:HGNC Symbol;Acc:542]	ortholog_one2one
170	ENSMMUP00000001011	171070000	PDCD6	programmed cell death 6 [Source:HGNC Symbol;Acc:8765]	ortholog_one2one
531	ENSMMUP00000003116	171070000	PRKCSH	protein kinase C substrate 80K-H [Source:HGNC Symbol;Acc:9411]	ortholog_one2one
2129	ENSMMUP00000012041	170900000	CAP1	CAP, adenylate cyclase-associated protein 1 (yeast) [Source:HGNC Symbol;Acc:20040]	ortholog_one2one
