# Supplementary material for: Unravelling the proteome of adult rhesus monkey ovaries
Source: Royal Society of Chemistry journal article supplement (doi:10.1039/c3mb70312f), 2013-11-25
Supplement: c3mb70312f_6.xlsx [file c3mb70312f_6.xlsx]

## Sheet: MGI
Supplementary Data 7: Mapping of the homologous mouse genes of the identified proteins to MGI female mice reproductive phenotypes database
Classification	Reproductive Gene	MGI Gene/Marker ID	Symbol	MP ID	Reproductive phenotype
meiosis
1	ENSMUSG00000028766	MGI:87983	Alpl	MP:0005168	abnormal female meiosis
2	ENSMUSG00000034218	MGI:107202	Atm	MP:0005168	abnormal female meiosis
3	ENSMUSG00000041741	MGI:1860764	Pde3a	MP:0005168	abnormal female meiosis
4	ENSMUSG00000006307	MGI:109565	Wbp7	MP:0010767	abnormal female meiosis I arrest
5	ENSMUSG00000060657	MGI:2444505	Marf1	MP:0010767	abnormal female meiosis I arrest
6	ENSMUSG00000025358	MGI:104772	Cdk2	MP:0001930	abnormal meiosis
7	ENSMUSG00000028766	MGI:87983	Alpl	MP:0009761	abnormal meiotic spindle morphology
oocyte
1	ENSMUSG00000004948	MGI:99215	Zp3	MP:0001125	abnormal oocyte morphology
2	ENSMUSG00000025358	MGI:104772	Cdk2	MP:0001125	abnormal oocyte morphology
3	ENSMUSG00000028356	MGI:88002	Ambp	MP:0001125	abnormal oocyte morphology
4	ENSMUSG00000028766	MGI:87983	Alpl	MP:0001125	abnormal oocyte morphology
5	ENSMUSG00000021540	MGI:1328787	Smad5	MP:0002208	abnormal germ cell morphology
6	ENSMUSG00000019942	MGI:88351	Cdk1	MP:0004805	absent oocytes
7	ENSMUSG00000025358	MGI:104772	Cdk2	MP:0004805	absent oocytes
8	ENSMUSG00000028224	MGI:1351625	Nbn	MP:0004805	absent oocytes
9	ENSMUSG00000034218	MGI:107202	Atm	MP:0004805	absent oocytes
10	ENSMUSG00000057329	MGI:88138	Bcl2	MP:0004805	absent oocytes
11	ENSMUSG00000020346	MGI:96973	Mgat1	MP:0005431	decreased oocyte number
12	ENSMUSG00000024515	MGI:894293	Smad4	MP:0005431	decreased oocyte number
13	ENSMUSG00000024563	MGI:108051	Smad2	MP:0005431	decreased oocyte number
14	ENSMUSG00000025326	MGI:105098	Ube3a	MP:0005431	decreased oocyte number
15	ENSMUSG00000028224	MGI:1351625	Nbn	MP:0005431	decreased oocyte number
16	ENSMUSG00000028766	MGI:87983	Alpl	MP:0005431	decreased oocyte number
17	ENSMUSG00000032402	MGI:1201674	Smad3	MP:0005431	decreased oocyte number
18	ENSMUSG00000057722	MGI:104993	Lepr	MP:0005431	decreased oocyte number
19	ENSMUSG00000034021	MGI:2140945	Pds5b	MP:0002209	decreased germ cell number
20	ENSMUSG00000039656	MGI:98215	Rxrb	MP:0002209	decreased germ cell number
zona pellucida
1	ENSMUSG00000020346	MGI:96973	Mgat1	MP:0003696	abnormal zona pellucida morphology
2	ENSMUSG00000024734	MGI:103073	Zp1	MP:0003696	abnormal zona pellucida morphology
3	ENSMUSG00000004948	MGI:99215	Zp3	MP:0003697	absent zona pellucida
4	ENSMUSG00000028356	MGI:88002	Ambp	MP:0003697	absent zona pellucida
5	ENSMUSG00000004948	MGI:99215	Zp3	MP:0009375	thin zona pellucida
6	ENSMUSG00000020346	MGI:96973	Mgat1	MP:0009375	thin zona pellucida
7	ENSMUSG00000024734	MGI:103073	Zp1	MP:0009375	thin zona pellucida
8	ENSMUSG00000030911	MGI:99214	Zp2	MP:0009375	thin zona pellucida
granulosa/cumulus cell
1	ENSMUSG00000006932	MGI:88276	Ctnnb1	MP:0008868	abnormal granulosa cell morphology
2	ENSMUSG00000024515	MGI:894293	Smad4	MP:0008868	abnormal granulosa cell morphology
3	ENSMUSG00000024734	MGI:103073	Zp1	MP:0008868	abnormal granulosa cell morphology
4	ENSMUSG00000027665	MGI:1206581	Pik3ca	MP:0008868	abnormal granulosa cell morphology
5	ENSMUSG00000006932	MGI:88276	Ctnnb1	MP:0003357	impaired granulosa cell differentiation
6	ENSMUSG00000004948	MGI:99215	Zp3	MP:0009372	abnormal cumulus oophorus
7	ENSMUSG00000030911	MGI:99214	Zp2	MP:0009372	abnormal cumulus oophorus
thecal cell
1	ENSMUSG00000004056	MGI:104874	Akt2	MP:0009371	increased thecal cell number
2	ENSMUSG00000020097	MGI:1261415	Sgpl1	MP:0009370	decreased thecal cell number
3	ENSMUSG00000029231	MGI:97530	Pdgfra	MP:0009370	decreased thecal cell number
corpus luteum
1	ENSMUSG00000047250	MGI:97797	Ptgs1	MP:0002679	abnormal corpus luteum morphology
2	ENSMUSG00000004040	MGI:103038	Stat3	MP:0001134	absent corpus luteum
3	ENSMUSG00000009079	MGI:99960	Ewsr1	MP:0001134	absent corpus luteum
4	ENSMUSG00000020097	MGI:1261415	Sgpl1	MP:0001134	absent corpus luteum
5	ENSMUSG00000025358	MGI:104772	Cdk2	MP:0001134	absent corpus luteum
6	ENSMUSG00000026751	MGI:1346833	Nr5a1	MP:0001134	absent corpus luteum
7	ENSMUSG00000029231	MGI:97530	Pdgfra	MP:0001134	absent corpus luteum
8	ENSMUSG00000031870	MGI:97567	Pgr	MP:0001134	absent corpus luteum
9	ENSMUSG00000035246	MGI:2147987	Pcyt1b	MP:0001134	absent corpus luteum
10	ENSMUSG00000057722	MGI:104993	Lepr	MP:0001134	absent corpus luteum
11	ENSMUSG00000004056	MGI:104874	Akt2	MP:0002680	decreased corpora lutea number
12	ENSMUSG00000029231	MGI:97530	Pdgfra	MP:0002680	decreased corpora lutea number
13	ENSMUSG00000057722	MGI:104993	Lepr	MP:0002680	decreased corpora lutea number
14	ENSMUSG00000025326	MGI:105098	Ube3a	MP:0003356	impaired luteinization
15	ENSMUSG00000031870	MGI:97567	Pgr	MP:0003356	impaired luteinization
16	ENSMUSG00000031278	MGI:1354713	Acsl4	MP:0002681	increased corpora lutea number
follicle
1	ENSMUSG00000003873	MGI:99702	Bax	MP:0001131	abnormal ovarian follicle morphology
2	ENSMUSG00000024122	MGI:1338068	Pdpk1	MP:0001131	abnormal ovarian follicle morphology
3	ENSMUSG00000024515	MGI:894293	Smad4	MP:0001131	abnormal ovarian follicle morphology
4	ENSMUSG00000024563	MGI:108051	Smad2	MP:0001131	abnormal ovarian follicle morphology
5	ENSMUSG00000027905	MGI:1858415	Ddx20	MP:0001131	abnormal ovarian follicle morphology
6	ENSMUSG00000029231	MGI:97530	Pdgfra	MP:0001131	abnormal ovarian follicle morphology
7	ENSMUSG00000032402	MGI:1201674	Smad3	MP:0001131	abnormal ovarian follicle morphology
8	ENSMUSG00000028766	MGI:87983	Alpl	MP:0009361	abnormal primordial ovarian follicle morphology
9	ENSMUSG00000057329	MGI:88138	Bcl2	MP:0009361	abnormal primordial ovarian follicle morphology
10	ENSMUSG00000004266	MGI:96055	Ptpn6	MP:0009363	abnormal secondary ovarian follicle morphology
11	ENSMUSG00000004948	MGI:99215	Zp3	MP:0009363	abnormal secondary ovarian follicle morphology
12	ENSMUSG00000024515	MGI:894293	Smad4	MP:0009363	abnormal secondary ovarian follicle morphology
13	ENSMUSG00000024563	MGI:108051	Smad2	MP:0009363	abnormal secondary ovarian follicle morphology
14	ENSMUSG00000030911	MGI:99214	Zp2	MP:0009363	abnormal secondary ovarian follicle morphology
15	ENSMUSG00000032402	MGI:1201674	Smad3	MP:0009363	abnormal secondary ovarian follicle morphology
16	ENSMUSG00000026751	MGI:1346833	Nr5a1	MP:0001132	absent mature ovarian follicles
17	ENSMUSG00000009079	MGI:99960	Ewsr1	MP:0002777	absent ovarian follicles
18	ENSMUSG00000019942	MGI:88351	Cdk1	MP:0002777	absent ovarian follicles
19	ENSMUSG00000025358	MGI:104772	Cdk2	MP:0002777	absent ovarian follicles
20	ENSMUSG00000028224	MGI:1351625	Nbn	MP:0002777	absent ovarian follicles
21	ENSMUSG00000028766	MGI:87983	Alpl	MP:0002777	absent ovarian follicles
22	ENSMUSG00000030846	MGI:107913	Tial1	MP:0002777	absent ovarian follicles
23	ENSMUSG00000034218	MGI:107202	Atm	MP:0002777	absent ovarian follicles
24	ENSMUSG00000035246	MGI:2147987	Pcyt1b	MP:0002777	absent ovarian follicles
25	ENSMUSG00000057722	MGI:104993	Lepr	MP:0002777	absent ovarian follicles
26	ENSMUSG00000020346	MGI:96973	Mgat1	MP:0002682	decreased mature ovarian follicle number
27	ENSMUSG00000024515	MGI:894293	Smad4	MP:0002682	decreased mature ovarian follicle number
28	ENSMUSG00000026751	MGI:1346833	Nr5a1	MP:0002682	decreased mature ovarian follicle number
29	ENSMUSG00000057722	MGI:104993	Lepr	MP:0002682	decreased mature ovarian follicle number
30	ENSMUSG00000020097	MGI:1261415	Sgpl1	MP:0011129	decreased secondary ovarian follicle number
31	ENSMUSG00000029231	MGI:97530	Pdgfra	MP:0011129	decreased secondary ovarian follicle number
32	ENSMUSG00000003873	MGI:99702	Bax	MP:0008870	increased mature ovarian follicle number
33	ENSMUSG00000031870	MGI:97567	Pgr	MP:0008870	increased mature ovarian follicle number
34	ENSMUSG00000006307	MGI:109565	Wbp7	MP:0008871	abnormal ovarian follicle number
35	ENSMUSG00000032171	MGI:1346036	Pin1	MP:0008871	abnormal ovarian follicle number
oogenesis/folliculogenesis
1	ENSMUSG00000020346	MGI:96973	Mgat1	MP:0001931	abnormal oogenesis
2	ENSMUSG00000025358	MGI:104772	Cdk2	MP:0001931	abnormal oogenesis
3	ENSMUSG00000034218	MGI:107202	Atm	MP:0001931	abnormal oogenesis
4	ENSMUSG00000003873	MGI:99702	Bax	MP:0001130	abnormal ovarian folliculogenesis
5	ENSMUSG00000004948	MGI:99215	Zp3	MP:0001130	abnormal ovarian folliculogenesis
6	ENSMUSG00000024515	MGI:894293	Smad4	MP:0001130	abnormal ovarian folliculogenesis
7	ENSMUSG00000024734	MGI:103073	Zp1	MP:0001130	abnormal ovarian folliculogenesis
8	ENSMUSG00000025326	MGI:105098	Ube3a	MP:0001130	abnormal ovarian folliculogenesis
9	ENSMUSG00000032402	MGI:1201674	Smad3	MP:0001130	abnormal ovarian folliculogenesis
10	ENSMUSG00000026751	MGI:1346833	Nr5a1	MP:0001129	impaired ovarian folliculogenesis
11	ENSMUSG00000071054	MGI:2146974	Safb	MP:0001129	impaired ovarian folliculogenesis
12	ENSMUSG00000006307	MGI:109565	Wbp7	MP:0002678	increased follicle recruitment
cumulus expansion
1	ENSMUSG00000024515	MGI:894293	Smad4	MP:0009373	abnormal cumulus expansion
2	ENSMUSG00000024563	MGI:108051	Smad2	MP:0009373	abnormal cumulus expansion
3	ENSMUSG00000032402	MGI:1201674	Smad3	MP:0009373	abnormal cumulus expansion
4	ENSMUSG00000024515	MGI:894293	Smad4	MP:0009374	absent cumulus expansion
5	ENSMUSG00000028356	MGI:88002	Ambp	MP:0009374	absent cumulus expansion
ovulation
1	ENSMUSG00000004948	MGI:99215	Zp3	MP:0001928	abnormal ovulation
2	ENSMUSG00000026751	MGI:1346833	Nr5a1	MP:0001928	abnormal ovulation
3	ENSMUSG00000028356	MGI:88002	Ambp	MP:0001928	abnormal ovulation
4	ENSMUSG00000030911	MGI:99214	Zp2	MP:0001928	abnormal ovulation
5	ENSMUSG00000031870	MGI:97567	Pgr	MP:0001928	abnormal ovulation
6	ENSMUSG00000004040	MGI:103038	Stat3	MP:0008869	anovulation
7	ENSMUSG00000006307	MGI:109565	Wbp7	MP:0008869	anovulation
8	ENSMUSG00000020097	MGI:1261415	Sgpl1	MP:0008869	anovulation
9	ENSMUSG00000026751	MGI:1346833	Nr5a1	MP:0008869	anovulation
10	ENSMUSG00000029231	MGI:97530	Pdgfra	MP:0008869	anovulation
11	ENSMUSG00000031870	MGI:97567	Pgr	MP:0008869	anovulation
12	ENSMUSG00000057722	MGI:104993	Lepr	MP:0008869	anovulation
13	ENSMUSG00000004948	MGI:99215	Zp3	MP:0003355	decreased ovulation rate
14	ENSMUSG00000024515	MGI:894293	Smad4	MP:0003355	decreased ovulation rate
15	ENSMUSG00000025132	MGI:2178103	Arhgdia	MP:0003355	decreased ovulation rate
16	ENSMUSG00000057722	MGI:104993	Lepr	MP:0003355	decreased ovulation rate
17	ENSMUSG00000006307	MGI:109565	Wbp7	MP:0009648	abnormal superovulation
18	ENSMUSG00000030357	MGI:95543	Fkbp4	MP:0009648	abnormal superovulation
fertilization
1	ENSMUSG00000041550	MGI:107817	Serpina5	MP:0005410	abnormal fertilization
2	ENSMUSG00000017754	MGI:103151	Pltp	MP:0000242	impaired fertilization
3	ENSMUSG00000019861	MGI:2149946	Gopc	MP:0000242	impaired fertilization
4	ENSMUSG00000020654	MGI:99675	Adcy3	MP:0000242	impaired fertilization
5	ENSMUSG00000020681	MGI:87874	Ace	MP:0000242	impaired fertilization
6	ENSMUSG00000021665	MGI:96074	Hexb	MP:0000242	impaired fertilization
7	ENSMUSG00000025132	MGI:2178103	Arhgdia	MP:0000242	impaired fertilization
8	ENSMUSG00000028356	MGI:88002	Ambp	MP:0000242	impaired fertilization
9	ENSMUSG00000030342	MGI:88348	Cd9	MP:0000242	impaired fertilization
10	ENSMUSG00000030357	MGI:95543	Fkbp4	MP:0000242	impaired fertilization
11	ENSMUSG00000053536	MGI:1932622	Cstf2t	MP:0000242	impaired fertilization
12	ENSMUSG00000055319	MGI:2450915	Sec23ip	MP:0000242	impaired fertilization
13	ENSMUSG00000062300	MGI:97822	Pvrl2	MP:0000242	impaired fertilization
fertility
1	ENSMUSG00000020198	MGI:107734	Ap3d1	MP:0002161	abnormal fertility/fecundity
2	ENSMUSG00000020654	MGI:99675	Adcy3	MP:0002161	abnormal fertility/fecundity
3	ENSMUSG00000021595	MGI:107252	Nsun2	MP:0002161	abnormal fertility/fecundity
4	ENSMUSG00000021665	MGI:96074	Hexb	MP:0002161	abnormal fertility/fecundity
5	ENSMUSG00000023026	MGI:2145977	Dip2b	MP:0002161	abnormal fertility/fecundity
6	ENSMUSG00000024974	MGI:1339795	Smc3	MP:0002161	abnormal fertility/fecundity
7	ENSMUSG00000025132	MGI:2178103	Arhgdia	MP:0002161	abnormal fertility/fecundity
8	ENSMUSG00000025358	MGI:104772	Cdk2	MP:0002161	abnormal fertility/fecundity
9	ENSMUSG00000026532	MGI:98385	Spta1	MP:0002161	abnormal fertility/fecundity
10	ENSMUSG00000028766	MGI:87983	Alpl	MP:0002161	abnormal fertility/fecundity
11	ENSMUSG00000031278	MGI:1354713	Acsl4	MP:0002161	abnormal fertility/fecundity
12	ENSMUSG00000031403	MGI:1861727	Dkc1	MP:0002161	abnormal fertility/fecundity
13	ENSMUSG00000032402	MGI:1201674	Smad3	MP:0002161	abnormal fertility/fecundity
14	ENSMUSG00000071054	MGI:2146974	Safb	MP:0002161	abnormal fertility/fecundity
15	ENSMUSG00000001441	MGI:1101358	Npepps	MP:0001935	decreased litter size
16	ENSMUSG00000001506	MGI:88467	Col1a1	MP:0001935	decreased litter size
17	ENSMUSG00000001729	MGI:87986	Akt1	MP:0001935	decreased litter size
18	ENSMUSG00000002748	MGI:1353499	Baz1b	MP:0001935	decreased litter size
19	ENSMUSG00000003099	MGI:102666	Ppp5c	MP:0001935	decreased litter size
20	ENSMUSG00000004948	MGI:99215	Zp3	MP:0001935	decreased litter size
21	ENSMUSG00000005514	MGI:97744	Por	MP:0001935	decreased litter size
22	ENSMUSG00000005566	MGI:109274	Trim28	MP:0001935	decreased litter size
23	ENSMUSG00000006932	MGI:88276	Ctnnb1	MP:0001935	decreased litter size
24	ENSMUSG00000013236	MGI:97815	Ptprs	MP:0001935	decreased litter size
25	ENSMUSG00000017737	MGI:97011	Mmp9	MP:0001935	decreased litter size
26	ENSMUSG00000019929	MGI:94872	Dcn	MP:0001935	decreased litter size
27	ENSMUSG00000020346	MGI:96973	Mgat1	MP:0001935	decreased litter size
28	ENSMUSG00000020467	MGI:1339998	Efemp1	MP:0001935	decreased litter size
29	ENSMUSG00000020654	MGI:99675	Adcy3	MP:0001935	decreased litter size
30	ENSMUSG00000020681	MGI:87874	Ace	MP:0001935	decreased litter size
31	ENSMUSG00000020733	MGI:1349482	Slc9a3r1	MP:0001935	decreased litter size
32	ENSMUSG00000021540	MGI:1328787	Smad5	MP:0001935	decreased litter size
33	ENSMUSG00000023830	MGI:96435	Igf2r	MP:0001935	decreased litter size
34	ENSMUSG00000024513	MGI:1333813	Mbd2	MP:0001935	decreased litter size
35	ENSMUSG00000024515	MGI:894293	Smad4	MP:0001935	decreased litter size
36	ENSMUSG00000024563	MGI:108051	Smad2	MP:0001935	decreased litter size
37	ENSMUSG00000024734	MGI:103073	Zp1	MP:0001935	decreased litter size
38	ENSMUSG00000025225	MGI:1099800	Nfkb2	MP:0001935	decreased litter size
39	ENSMUSG00000025232	MGI:96073	Hexa	MP:0001935	decreased litter size
40	ENSMUSG00000025326	MGI:105098	Ube3a	MP:0001935	decreased litter size
41	ENSMUSG00000026003	MGI:87866	Acadl	MP:0001935	decreased litter size
42	ENSMUSG00000026317	MGI:1349447	Cln8	MP:0001935	decreased litter size
43	ENSMUSG00000026374	MGI:109263	Tsn	MP:0001935	decreased litter size
44	ENSMUSG00000026712	MGI:97142	Mrc1	MP:0001935	decreased litter size
45	ENSMUSG00000028207	MGI:1914186	Asph	MP:0001935	decreased litter size
46	ENSMUSG00000028356	MGI:88002	Ambp	MP:0001935	decreased litter size
47	ENSMUSG00000028426	MGI:105128	Rad23b	MP:0001935	decreased litter size
48	ENSMUSG00000028766	MGI:87983	Alpl	MP:0001935	decreased litter size
49	ENSMUSG00000029455	MGI:99600	Aldh2	MP:0001935	decreased litter size
50	ENSMUSG00000030342	MGI:88348	Cd9	MP:0001935	decreased litter size
51	ENSMUSG00000030357	MGI:95543	Fkbp4	MP:0001935	decreased litter size
52	ENSMUSG00000030795	MGI:1353633	Fus	MP:0001935	decreased litter size
53	ENSMUSG00000030911	MGI:99214	Zp2	MP:0001935	decreased litter size
54	ENSMUSG00000031278	MGI:1354713	Acsl4	MP:0001935	decreased litter size
55	ENSMUSG00000031375	MGI:88158	Bgn	MP:0001935	decreased litter size
56	ENSMUSG00000031402	MGI:105941	Mpp1	MP:0001935	decreased litter size
57	ENSMUSG00000031446	MGI:1914487	Cul4a	MP:0001935	decreased litter size
58	ENSMUSG00000031902	MGI:103296	Nfatc3	MP:0001935	decreased litter size
59	ENSMUSG00000032171	MGI:1346036	Pin1	MP:0001935	decreased litter size
60	ENSMUSG00000032402	MGI:1201674	Smad3	MP:0001935	decreased litter size
61	ENSMUSG00000037242	MGI:1352754	Clic4	MP:0001935	decreased litter size
62	ENSMUSG00000040152	MGI:98737	Thbs1	MP:0001935	decreased litter size
63	ENSMUSG00000042082	MGI:88075	Arsb	MP:0001935	decreased litter size
64	ENSMUSG00000042650	MGI:2144489	Alkbh5	MP:0001935	decreased litter size
65	ENSMUSG00000043733	MGI:99511	Ptpn11	MP:0001935	decreased litter size
66	ENSMUSG00000045103	MGI:94909	Dmd	MP:0001935	decreased litter size
67	ENSMUSG00000046070	MGI:107973	Igfals	MP:0001935	decreased litter size
68	ENSMUSG00000050468	MGI:3046414	Astl	MP:0001935	decreased litter size
69	ENSMUSG00000055322	MGI:104552	Tns1	MP:0001935	decreased litter size
70	ENSMUSG00000071054	MGI:2146974	Safb	MP:0001935	decreased litter size
71	ENSMUSG00000000805	MGI:1096574	Car4	MP:0001926	female infertility
72	ENSMUSG00000002731	MGI:1344375	Prkra	MP:0001926	female infertility
73	ENSMUSG00000003731	MGI:1100836	Kpna6	MP:0001926	female infertility
74	ENSMUSG00000004040	MGI:103038	Stat3	MP:0001926	female infertility
75	ENSMUSG00000004099	MGI:94912	Dnmt1	MP:0001926	female infertility
76	ENSMUSG00000004266	MGI:96055	Ptpn6	MP:0001926	female infertility
77	ENSMUSG00000004880	MGI:2138281	Lbr	MP:0001926	female infertility
78	ENSMUSG00000004948	MGI:99215	Zp3	MP:0001926	female infertility
79	ENSMUSG00000005514	MGI:97744	Por	MP:0001926	female infertility
80	ENSMUSG00000006307	MGI:109565	Wbp7	MP:0001926	female infertility
81	ENSMUSG00000009079	MGI:99960	Ewsr1	MP:0001926	female infertility
82	ENSMUSG00000015243	MGI:99607	Abca1	MP:0001926	female infertility
83	ENSMUSG00000020097	MGI:1261415	Sgpl1	MP:0001926	female infertility
84	ENSMUSG00000020777	MGI:1330812	Acox1	MP:0001926	female infertility
85	ENSMUSG00000021115	MGI:1261847	Vrk1	MP:0001926	female infertility
86	ENSMUSG00000021224	MGI:107423	Numb	MP:0001926	female infertility
87	ENSMUSG00000021686	MGI:1333879	Ap3b1	MP:0001926	female infertility
88	ENSMUSG00000021756	MGI:96560	Il6st	MP:0001926	female infertility
89	ENSMUSG00000022672	MGI:104779	Prkdc	MP:0001926	female infertility
90	ENSMUSG00000023830	MGI:96435	Igf2r	MP:0001926	female infertility
91	ENSMUSG00000024122	MGI:1338068	Pdpk1	MP:0001926	female infertility
92	ENSMUSG00000025358	MGI:104772	Cdk2	MP:0001926	female infertility
93	ENSMUSG00000025854	MGI:2136853	Fam20c	MP:0001926	female infertility
94	ENSMUSG00000026751	MGI:1346833	Nr5a1	MP:0001926	female infertility
95	ENSMUSG00000027199	MGI:1914342	Gatm	MP:0001926	female infertility
96	ENSMUSG00000027646	MGI:98397	Src	MP:0001926	female infertility
97	ENSMUSG00000028224	MGI:1351625	Nbn	MP:0001926	female infertility
98	ENSMUSG00000028356	MGI:88002	Ambp	MP:0001926	female infertility
99	ENSMUSG00000028692	MGI:1929955	Akr1a1	MP:0001926	female infertility
100	ENSMUSG00000028766	MGI:87983	Alpl	MP:0001926	female infertility
101	ENSMUSG00000029231	MGI:97530	Pdgfra	MP:0001926	female infertility
102	ENSMUSG00000029338	MGI:1919164	Antxr2	MP:0001926	female infertility
103	ENSMUSG00000030342	MGI:88348	Cd9	MP:0001926	female infertility
104	ENSMUSG00000030357	MGI:95543	Fkbp4	MP:0001926	female infertility
105	ENSMUSG00000030846	MGI:107913	Tial1	MP:0001926	female infertility
106	ENSMUSG00000030911	MGI:99214	Zp2	MP:0001926	female infertility
107	ENSMUSG00000031870	MGI:97567	Pgr	MP:0001926	female infertility
108	ENSMUSG00000034218	MGI:107202	Atm	MP:0001926	female infertility
109	ENSMUSG00000035246	MGI:2147987	Pcyt1b	MP:0001926	female infertility
110	ENSMUSG00000037012	MGI:96103	Hk1	MP:0001926	female infertility
111	ENSMUSG00000041741	MGI:1860764	Pde3a	MP:0001926	female infertility
112	ENSMUSG00000047879	MGI:1928898	Usp14	MP:0001926	female infertility
113	ENSMUSG00000057722	MGI:104993	Lepr	MP:0001926	female infertility
114	ENSMUSG00000060657	MGI:2444505	Marf1	MP:0001926	female infertility
115	ENSMUSG00000071646	MGI:1346340	Mta2	MP:0001926	female infertility
116	ENSMUSG00000053158	MGI:95514	Fes	MP:0001934	increased litter size
117	ENSMUSG00000001506	MGI:88467	Col1a1	MP:0001924	infertility
118	ENSMUSG00000009073	MGI:97307	Nf2	MP:0001924	infertility
119	ENSMUSG00000019942	MGI:88351	Cdk1	MP:0001924	infertility
120	ENSMUSG00000020366	MGI:1346862	Mapk9	MP:0001924	infertility
121	ENSMUSG00000020467	MGI:1339998	Efemp1	MP:0001924	infertility
122	ENSMUSG00000020612	MGI:104878	Prkar1a	MP:0001924	infertility
123	ENSMUSG00000021061	MGI:98387	Sptb	MP:0001924	infertility
124	ENSMUSG00000021665	MGI:96074	Hexb	MP:0001924	infertility
125	ENSMUSG00000022570	MGI:98857	Tsta3	MP:0001924	infertility
126	ENSMUSG00000024515	MGI:894293	Smad4	MP:0001924	infertility
127	ENSMUSG00000024921	MGI:99603	Smarca2	MP:0001924	infertility
128	ENSMUSG00000025232	MGI:96073	Hexa	MP:0001924	infertility
129	ENSMUSG00000025358	MGI:104772	Cdk2	MP:0001924	infertility
130	ENSMUSG00000025793	MGI:104681	Hgs	MP:0001924	infertility
131	ENSMUSG00000026532	MGI:98385	Spta1	MP:0001924	infertility
132	ENSMUSG00000026751	MGI:1346833	Nr5a1	MP:0001924	infertility
133	ENSMUSG00000028063	MGI:96794	Lmna	MP:0001924	infertility
134	ENSMUSG00000031309	MGI:104557	Rps6ka3	MP:0001924	infertility
135	ENSMUSG00000031502	MGI:88454	Col4a1	MP:0001924	infertility
136	ENSMUSG00000034218	MGI:107202	Atm	MP:0001924	infertility
137	ENSMUSG00000057722	MGI:104993	Lepr	MP:0001924	infertility
138	ENSMUSG00000004880	MGI:2138281	Lbr	MP:0001923	reduced female fertility
139	ENSMUSG00000004948	MGI:99215	Zp3	MP:0001923	reduced female fertility
140	ENSMUSG00000005514	MGI:97744	Por	MP:0001923	reduced female fertility
141	ENSMUSG00000006307	MGI:109565	Wbp7	MP:0001923	reduced female fertility
142	ENSMUSG00000015243	MGI:99607	Abca1	MP:0001923	reduced female fertility
143	ENSMUSG00000019929	MGI:94872	Dcn	MP:0001923	reduced female fertility
144	ENSMUSG00000019979	MGI:1306796	Apaf1	MP:0001923	reduced female fertility
145	ENSMUSG00000020346	MGI:96973	Mgat1	MP:0001923	reduced female fertility
146	ENSMUSG00000020654	MGI:99675	Adcy3	MP:0001923	reduced female fertility
147	ENSMUSG00000023830	MGI:96435	Igf2r	MP:0001923	reduced female fertility
148	ENSMUSG00000024563	MGI:108051	Smad2	MP:0001923	reduced female fertility
149	ENSMUSG00000024734	MGI:103073	Zp1	MP:0001923	reduced female fertility
150	ENSMUSG00000025132	MGI:2178103	Arhgdia	MP:0001923	reduced female fertility
151	ENSMUSG00000025326	MGI:105098	Ube3a	MP:0001923	reduced female fertility
152	ENSMUSG00000026374	MGI:109263	Tsn	MP:0001923	reduced female fertility
153	ENSMUSG00000026532	MGI:98385	Spta1	MP:0001923	reduced female fertility
154	ENSMUSG00000027646	MGI:98397	Src	MP:0001923	reduced female fertility
155	ENSMUSG00000028063	MGI:96794	Lmna	MP:0001923	reduced female fertility
156	ENSMUSG00000028207	MGI:1914186	Asph	MP:0001923	reduced female fertility
157	ENSMUSG00000028356	MGI:88002	Ambp	MP:0001923	reduced female fertility
158	ENSMUSG00000028426	MGI:105128	Rad23b	MP:0001923	reduced female fertility
159	ENSMUSG00000028565	MGI:108056	Nfia	MP:0001923	reduced female fertility
160	ENSMUSG00000028766	MGI:87983	Alpl	MP:0001923	reduced female fertility
161	ENSMUSG00000030342	MGI:88348	Cd9	MP:0001923	reduced female fertility
162	ENSMUSG00000030795	MGI:1353633	Fus	MP:0001923	reduced female fertility
163	ENSMUSG00000030911	MGI:99214	Zp2	MP:0001923	reduced female fertility
164	ENSMUSG00000031278	MGI:1354713	Acsl4	MP:0001923	reduced female fertility
165	ENSMUSG00000031375	MGI:88158	Bgn	MP:0001923	reduced female fertility
166	ENSMUSG00000031446	MGI:1914487	Cul4a	MP:0001923	reduced female fertility
167	ENSMUSG00000031928	MGI:1100512	Mre11a	MP:0001923	reduced female fertility
168	ENSMUSG00000032171	MGI:1346036	Pin1	MP:0001923	reduced female fertility
169	ENSMUSG00000032402	MGI:1201674	Smad3	MP:0001923	reduced female fertility
170	ENSMUSG00000033306	MGI:2441849	Lpp	MP:0001923	reduced female fertility
171	ENSMUSG00000037242	MGI:1352754	Clic4	MP:0001923	reduced female fertility
172	ENSMUSG00000039109	MGI:1921395	F13a1	MP:0001923	reduced female fertility
173	ENSMUSG00000042520	MGI:1921633	Ubap2l	MP:0001923	reduced female fertility
174	ENSMUSG00000043733	MGI:99511	Ptpn11	MP:0001923	reduced female fertility
175	ENSMUSG00000045103	MGI:94909	Dmd	MP:0001923	reduced female fertility
176	ENSMUSG00000050468	MGI:3046414	Astl	MP:0001923	reduced female fertility
177	ENSMUSG00000051177	MGI:97613	Plcb1	MP:0001923	reduced female fertility
178	ENSMUSG00000055322	MGI:104552	Tns1	MP:0001923	reduced female fertility
179	ENSMUSG00000057722	MGI:104993	Lepr	MP:0001923	reduced female fertility
180	ENSMUSG00000071054	MGI:2146974	Safb	MP:0001923	reduced female fertility
181	ENSMUSG00000001036	MGI:1333766	Epn2	MP:0001921	reduced fertility
182	ENSMUSG00000001441	MGI:1101358	Npepps	MP:0001921	reduced fertility
183	ENSMUSG00000005514	MGI:97744	Por	MP:0001921	reduced fertility
184	ENSMUSG00000006589	MGI:88061	Aprt	MP:0001921	reduced fertility
185	ENSMUSG00000006782	MGI:88437	Cnp	MP:0001921	reduced fertility
186	ENSMUSG00000007655	MGI:102709	Cav1	MP:0001921	reduced fertility
187	ENSMUSG00000014426	MGI:1346875	Map3k4	MP:0001921	reduced fertility
188	ENSMUSG00000017737	MGI:97011	Mmp9	MP:0001921	reduced fertility
189	ENSMUSG00000019777	MGI:1097691	Hdac2	MP:0001921	reduced fertility
190	ENSMUSG00000020467	MGI:1339998	Efemp1	MP:0001921	reduced fertility
191	ENSMUSG00000020733	MGI:1349482	Slc9a3r1	MP:0001921	reduced fertility
192	ENSMUSG00000020777	MGI:1330812	Acox1	MP:0001921	reduced fertility
193	ENSMUSG00000021540	MGI:1328787	Smad5	MP:0001921	reduced fertility
194	ENSMUSG00000021957	MGI:105992	Tkt	MP:0001921	reduced fertility
195	ENSMUSG00000025225	MGI:1099800	Nfkb2	MP:0001921	reduced fertility
196	ENSMUSG00000025969	MGI:1100492	Nrp2	MP:0001921	reduced fertility
197	ENSMUSG00000027247	MGI:2445003	Arhgap1	MP:0001921	reduced fertility
198	ENSMUSG00000030802	MGI:1276121	Bckdk	MP:0001921	reduced fertility
199	ENSMUSG00000031502	MGI:88454	Col4a1	MP:0001921	reduced fertility
200	ENSMUSG00000033577	MGI:104785	Myo6	MP:0001921	reduced fertility
201	ENSMUSG00000035203	MGI:1333763	Epn1	MP:0001921	reduced fertility
202	ENSMUSG00000037003	MGI:2387586	Tenc1	MP:0001921	reduced fertility
203	ENSMUSG00000040152	MGI:98737	Thbs1	MP:0001921	reduced fertility
204	ENSMUSG00000042082	MGI:88075	Arsb	MP:0001921	reduced fertility
205	ENSMUSG00000045103	MGI:94909	Dmd	MP:0001921	reduced fertility
206	ENSMUSG00000045594	MGI:88151	Glb1	MP:0001921	reduced fertility
207	ENSMUSG00000052727	MGI:1306778	Map1b	MP:0001921	reduced fertility
208	ENSMUSG00000066406	MGI:2676556	Akap13	MP:0001921	reduced fertility
209	ENSMUSG00000021540	MGI:1328787	Smad5	MP:0008995	early reproductive senescence
ovary
1	ENSMUSG00000004056	MGI:104874	Akt2	MP:0001126	abnormal ovary morphology
2	ENSMUSG00000009079	MGI:99960	Ewsr1	MP:0001126	abnormal ovary morphology
3	ENSMUSG00000015243	MGI:99607	Abca1	MP:0001126	abnormal ovary morphology
4	ENSMUSG00000020097	MGI:1261415	Sgpl1	MP:0001126	abnormal ovary morphology
5	ENSMUSG00000025358	MGI:104772	Cdk2	MP:0001126	abnormal ovary morphology
6	ENSMUSG00000027665	MGI:1206581	Pik3ca	MP:0001126	abnormal ovary morphology
7	ENSMUSG00000027878	MGI:97364	Notch2	MP:0001126	abnormal ovary morphology
8	ENSMUSG00000028224	MGI:1351625	Nbn	MP:0001126	abnormal ovary morphology
9	ENSMUSG00000029231	MGI:97530	Pdgfra	MP:0001126	abnormal ovary morphology
10	ENSMUSG00000034218	MGI:107202	Atm	MP:0001126	abnormal ovary morphology
11	ENSMUSG00000035246	MGI:2147987	Pcyt1b	MP:0001126	abnormal ovary morphology
12	ENSMUSG00000027665	MGI:1206581	Pik3ca	MP:0003507	abnormal ovary physiology
13	ENSMUSG00000039519	MGI:104978	Cyp7b1	MP:0003507	abnormal ovary physiology
14	ENSMUSG00000026751	MGI:1346833	Nr5a1	MP:0009444	ovarian follicular cyst
15	ENSMUSG00000027878	MGI:97364	Notch2	MP:0009444	ovarian follicular cyst
16	ENSMUSG00000004266	MGI:96055	Ptpn6	MP:0004833	ovary atrophy
17	ENSMUSG00000025358	MGI:104772	Cdk2	MP:0004833	ovary atrophy
18	ENSMUSG00000071054	MGI:2146974	Safb	MP:0004833	ovary atrophy
19	ENSMUSG00000000538	MGI:2443306	Tom1l2	MP:0002016	ovary cysts
20	ENSMUSG00000004056	MGI:104874	Akt2	MP:0002016	ovary cysts
21	ENSMUSG00000007655	MGI:102709	Cav1	MP:0002016	ovary cysts
22	ENSMUSG00000024975	MGI:107490	Pdcd4	MP:0002016	ovary cysts
23	ENSMUSG00000026751	MGI:1346833	Nr5a1	MP:0004834	ovary hemorrhage
24	ENSMUSG00000027665	MGI:1206581	Pik3ca	MP:0004834	ovary hemorrhage
25	ENSMUSG00000027878	MGI:97364	Notch2	MP:0004834	ovary hemorrhage
26	ENSMUSG00000030846	MGI:107913	Tial1	MP:0001128	ovary hyperplasia
27	ENSMUSG00000035246	MGI:2147987	Pcyt1b	MP:0001128	ovary hyperplasia
28	ENSMUSG00000026751	MGI:1346833	Nr5a1	MP:0005158	ovary hypoplasia
29	ENSMUSG00000057722	MGI:104993	Lepr	MP:0001868	ovary inflammation
30	ENSMUSG00000004948	MGI:99215	Zp3	MP:0001127	small ovary
31	ENSMUSG00000009079	MGI:99960	Ewsr1	MP:0001127	small ovary
32	ENSMUSG00000019942	MGI:88351	Cdk1	MP:0001127	small ovary
33	ENSMUSG00000020097	MGI:1261415	Sgpl1	MP:0001127	small ovary
34	ENSMUSG00000020777	MGI:1330812	Acox1	MP:0001127	small ovary
35	ENSMUSG00000025358	MGI:104772	Cdk2	MP:0001127	small ovary
36	ENSMUSG00000026751	MGI:1346833	Nr5a1	MP:0001127	small ovary
37	ENSMUSG00000028224	MGI:1351625	Nbn	MP:0001127	small ovary
38	ENSMUSG00000029231	MGI:97530	Pdgfra	MP:0001127	small ovary
39	ENSMUSG00000030846	MGI:107913	Tial1	MP:0001127	small ovary
40	ENSMUSG00000031985	MGI:1343460	Gnpat	MP:0001127	small ovary
41	ENSMUSG00000034218	MGI:107202	Atm	MP:0001127	small ovary
42	ENSMUSG00000025921	MGI:1924238	Rdh10	MP:0001116	small gonad
43	ENSMUSG00000026751	MGI:1346833	Nr5a1	MP:0001116	small gonad
44	ENSMUSG00000028063	MGI:96794	Lmna	MP:0001116	small gonad
45	ENSMUSG00000027905	MGI:1858415	Ddx20	MP:0004855	increased ovary weight
46	ENSMUSG00000004948	MGI:99215	Zp3	MP:0004856	decreased ovary weight
47	ENSMUSG00000025326	MGI:105098	Ube3a	MP:0004856	decreased ovary weight
48	ENSMUSG00000026751	MGI:1346833	Nr5a1	MP:0004856	decreased ovary weight
49	ENSMUSG00000031278	MGI:1354713	Acsl4	MP:0004832	enlarged ovary
