# Supplementary figures and images for: Unravelling the proteome of adult rhesus monkey ovaries
Source: Royal Society of Chemistry journal article supplement (doi:10.1039/c3mb70312f), 2013-11-25

A

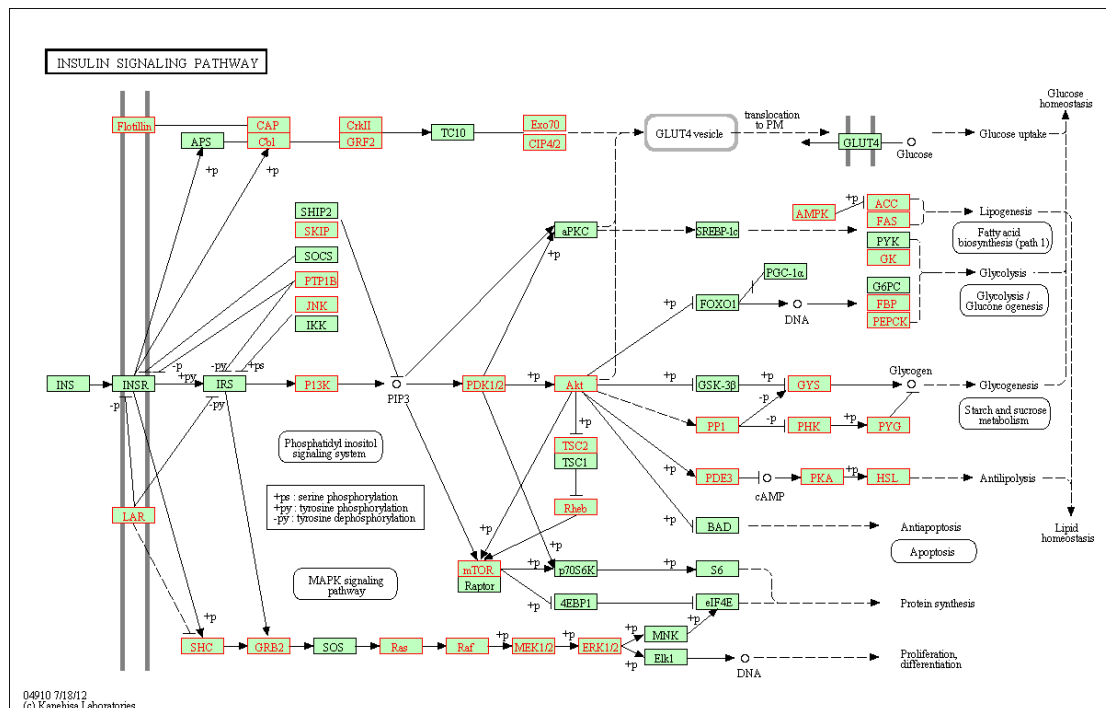

B

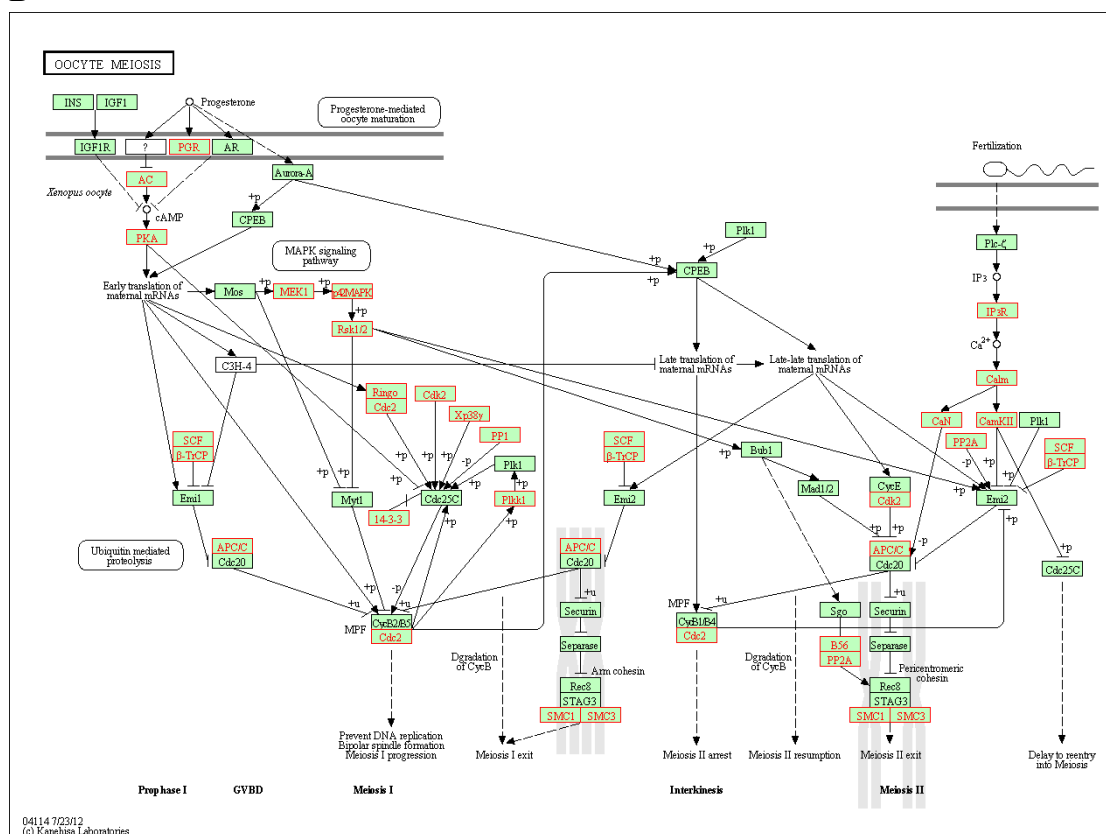

C

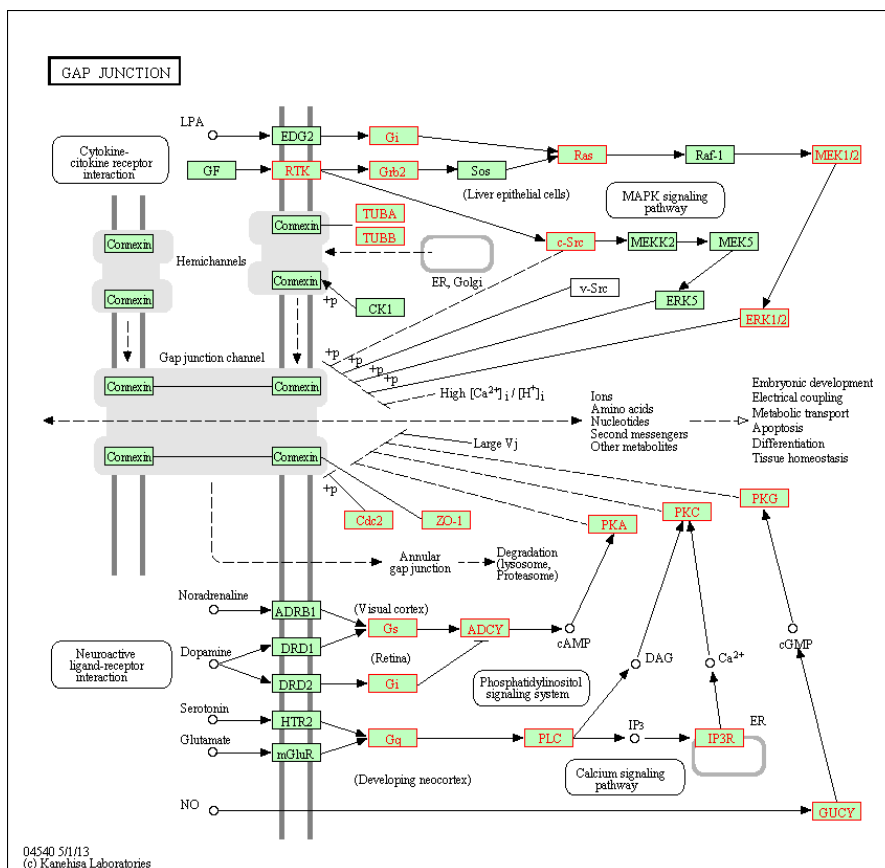

D

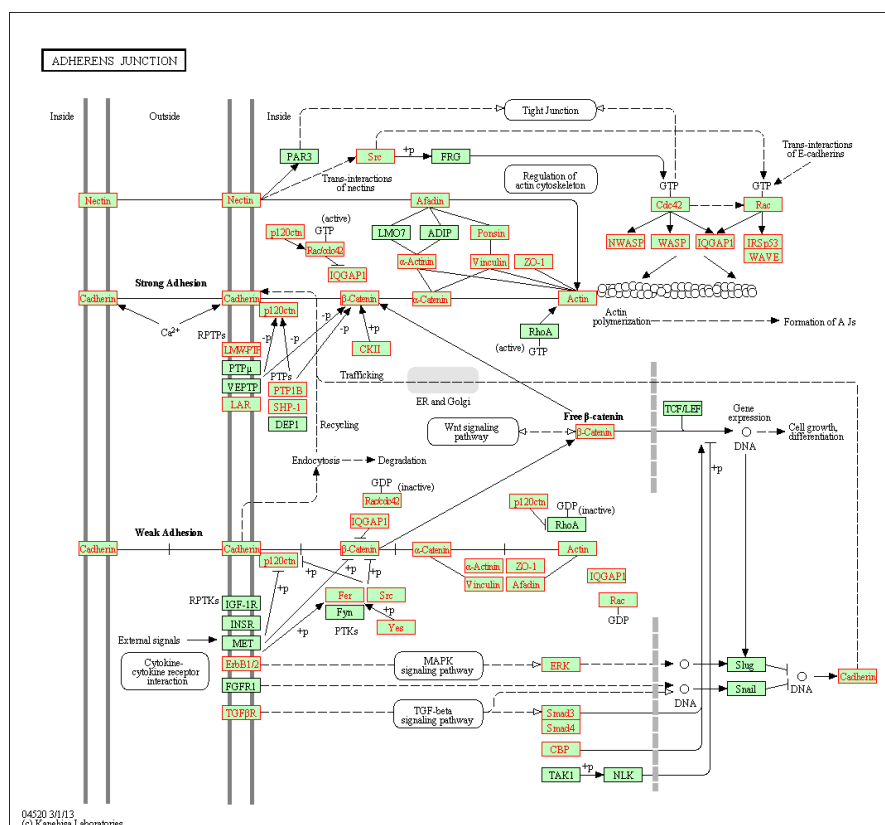

Supplement: c3mb70312f.pdf [file c3mb70312f.pdf]
